# Supplementary material for: Temporal and thermal profiling of the Toxoplasma proteome implicates parasite Protein Phosphatase 1 in the regulation of Ca2+-responsive pathways
Source: eLife. 2022 Aug 17;11:e80336. doi: 10.7554/eLife.80336 (PMC9436416; doi:10.7554/eLife.80336)
Supplement: Supplementary file 3. — 1. Protein and abundance assignments from Proteome Discoverer 2.4 for samples with 0 µM Ca2+, replicate 1. 2. Protein and abundance assignments from Proteome Discoverer 2.4 for samples with 0 µM Ca2+, replicate 2. 3. Protein and abundance assignments from Proteome Discoverer 2.4 for samples with 10 µM Ca2+, replicate 1. 4. Protein and abundance assignments from Proteome Discoverer 2.4 for samples with 10 µM Ca2+, replicate 2. 5. Curve fit output from the mineCETSA package. 6. Area under the euclidean distance score calculations from the mineCETSA package. [file elife-80336-supp3.xlsx]

## Sheet: 4.1_input_noCa_R1
Proteins Unique Sequence ID	Checked	Protein FDR Confidence: Combined	Master	Accession	Description	Exp. q-value: Combined	Sum PEP Score	Coverage [%]	# Peptides	# PSMs	# Unique Peptides	# AAs	MW [kDa]	calc. pI	Score Sequest HT: Sequest HT	# Peptides (by Search Engine): Sequest HT	Abundance Ratio: (41) / (37)	Abundance Ratio: (43) / (37)	Abundance Ratio: (47) / (37)	Abundance Ratio: (50) / (37)	Abundance Ratio: (53) / (37)	Abundance Ratio: (56) / (37)	Abundance Ratio: (59) / (37)	Abundance Ratio: (63) / (37)	Abundance Ratio: (67) / (37)	Abundance: F2: 126, Sample, 37	Abundance: F2: 127N, Sample, 41	Abundance: F2: 127C, Sample, 43	Abundance: F2: 128N, Sample, 47	Abundance: F2: 128C, Sample, 50	Abundance: F2: 129N, Sample, 53	Abundance: F2: 129C, Sample, 56	Abundance: F2: 130N, Sample, 59	Abundance: F2: 130C, Sample, 63	Abundance: F2: 131, Sample, 67	Found in Sample: [S2] F2: 126, Sample, 37	Found in Sample: [S14] F2: 127N, Sample, 41	Found in Sample: [S15] F2: 127C, Sample, 43	Found in Sample: [S16] F2: 128N, Sample, 47	Found in Sample: [S17] F2: 128C, Sample, 50	Found in Sample: [S18] F2: 129N, Sample, 53	Found in Sample: [S19] F2: 129C, Sample, 56	Found in Sample: [S20] F2: 130N, Sample, 59	Found in Sample: [S21] F2: 130C, Sample, 63	Found in Sample: [S22] F2: 131, Sample, 67	# Protein Groups	Modifications
7.05469e+17	FALSE	High	IsMasterProtein	TGGT1_277970-t26_1-p1	transcript=TGGT1_277970-t26_1 | gene=TGGT1_277970 | organism=Toxoplasma_gondii_GT1 | gene_product=Dolichol-phosphate mannosyltransferase subunit 1 [Source:UniProtKB/TrEMBL;Acc:A0A125YFJ5] | transcript_product=dolichol-phosphate-mannose synthase family protein | location=TGGT1_chrXII:6289993-6295627(-) | protein_length=237 | sequence_SO=chromosome | SO=protein_coding_gene | is_pseudo=false	0.001	4.69	7	1	1	1	237	26.9	8.98	3.45	1																				High	High	High	High	High	High	High	High	High	High	1
2.21985e+18	FALSE	High	IsMasterProtein	TGGT1_246960-t26_1-p1	transcript=TGGT1_246960-t26_1 | gene=TGGT1_246960 | organism=Toxoplasma_gondii_GT1 | gene_product=Lactamase_B domain-containing protein [Source:UniProtKB/TrEMBL;Acc:S7V1C7] | transcript_product=hypothetical protein | location=TGGT1_chrXII:2968483-2972456(+) | protein_length=775 | sequence_SO=chromosome | SO=protein_coding_gene | is_pseudo=false	0.001	5.126	2	1	1	1	775	83.6	6.8	4.28	1																				High	High	High	High	High	High	High	High	High	High	1
-6.33425e+18	FALSE	High	IsMasterProtein	TGGT1_265240-t26_1-p1	transcript=TGGT1_265240-t26_1 | gene=TGGT1_265240 | organism=Toxoplasma_gondii_GT1 | gene_product=hypothetical protein | transcript_product=hypothetical protein | location=TGGT1_chrIX:1491577-1498347(+) | protein_length=1238 | sequence_SO=chromosome | SO=protein_coding_gene | is_pseudo=false	0	8.297	2	1	1	1	1238	130.2	6.07	4.36	1																				High	High	High	High	High	High	High	High	High	High	1
5.28014e+18	FALSE	Medium	IsMasterProtein	TGGT1_244680-t26_1-p1	transcript=TGGT1_244680-t26_1 | gene=TGGT1_244680 | organism=Toxoplasma_gondii_GT1 | gene_product=A to I editase domain-containing protein [Source:UniProtKB/TrEMBL;Acc:S7UFV6] | transcript_product=hypothetical protein | location=TGGT1_chrVI:3360571-3365454(-) | protein_length=1473 | sequence_SO=chromosome | SO=protein_coding_gene | is_pseudo=false	0.041	1.405	1	1	1	1	1473	158.4	7.58	2.38	1																				High	High	High	High	High	High	High	High	High	High	1
-8.59301e+18	FALSE	High	IsMasterProtein	TGGT1_268660-t26_1-p1	transcript=TGGT1_268660-t26_1 | gene=TGGT1_268660 | organism=Toxoplasma_gondii_GT1 | gene_product=hypothetical protein | transcript_product=hypothetical protein | location=TGGT1_chrVIII:6371728-6372138(-) | protein_length=102 | sequence_SO=chromosome | SO=protein_coding_gene | is_pseudo=false	0.007	2.732	11	1	1	1	102	11.2	4.82	0	1																				High	High	High	High	High	High	High	High	High	High	1
-6.34085e+18	FALSE	High	IsMasterProtein	TGGT1_313750-t26_1-p1	transcript=TGGT1_313750-t26_1 | gene=TGGT1_313750 | organism=Toxoplasma_gondii_GT1 | gene_product=hypothetical protein | transcript_product=hypothetical protein | location=TGGT1_chrXI:3623027-3625195(-) | protein_length=296 | sequence_SO=chromosome | SO=protein_coding_gene | is_pseudo=false	0.002	4.039	9	1	1	1	296	31	9.14	3.92	1																				High	High	High	High	High	High	High	High	High	High	1
2.13273e+18	FALSE	High	IsMasterProtein	TGGT1_273885-t26_1-p1	transcript=TGGT1_273885-t26_1 | gene=TGGT1_273885 | organism=Toxoplasma_gondii_GT1 | gene_product=hypothetical protein | transcript_product=hypothetical protein | location=TGGT1_chrVIII:3186971-3194757(-) | protein_length=824 | sequence_SO=chromosome | SO=protein_coding_gene | is_pseudo=false	0.005	3.212	1	1	1	1	824	89.4	7.24	0	1																				High	High	High	High	High	High	High	High	High	High	1
2.25332e+18	FALSE	Medium	IsMasterProtein	TGGT1_305900-t26_1-p1	transcript=TGGT1_305900-t26_1 | gene=TGGT1_305900 | organism=Toxoplasma_gondii_GT1 | gene_product=hypothetical protein | transcript_product=hypothetical protein | location=TGGT1_chrIX:5441994-5443269(+) | protein_length=236 | sequence_SO=chromosome | SO=protein_coding_gene | is_pseudo=false	0.027	1.701	3	1	1	1	236	26.1	9.55	1.92	1																				High	High	High	High	High	High	High	High	High	High	1
-7.63353e+18	FALSE	Medium	IsMasterProtein	TGGT1_253470-t26_1-p1	transcript=TGGT1_253470-t26_1 | gene=TGGT1_253470 | organism=Toxoplasma_gondii_GT1 | gene_product=Alveolin domain containing intermediate filament IMC13 [Source:UniProtKB/TrEMBL;Acc:A0A125YG71] | transcript_product=alveolin domain containing intermediate filament IMC13 | location=TGGT1_chrIII:956404-958611(+) | protein_length=398 | sequence_SO=chromosome | SO=protein_coding_gene | is_pseudo=false	0.012	2.275	2	1	1	1	398	45.8	5.1	2.59	1																				High	High	High	High	High	High	High	High	High	High	1
-1.29063e+18	FALSE	High	IsMasterProtein	TGGT1_249380-t26_1-p1	transcript=TGGT1_249380-t26_1 | gene=TGGT1_249380 | organism=Toxoplasma_gondii_GT1 | gene_product=Palmitoyltransferase [Source:UniProtKB/TrEMBL;Acc:S7WGH8] | transcript_product=DHHC zinc finger domain-containing protein | location=TGGT1_chrXII:4434731-4437166(+) | protein_length=465 | sequence_SO=chromosome | SO=protein_coding_gene | is_pseudo=false	0	9.292	5	2	3	2	465	49.9	7.12	8.59	2																				High	High	High	High	High	High	High	High	High	High	1
-7.67535e+18	FALSE	High	IsMasterProtein	TGGT1_232080-t26_1-p1	transcript=TGGT1_232080-t26_1 | gene=TGGT1_232080 | organism=Toxoplasma_gondii_GT1 | gene_product=Chorein_N domain-containing protein [Source:UniProtKB/TrEMBL;Acc:S7WJ08] | transcript_product=hypothetical protein | location=TGGT1_chrVIII:1804634-1839298(-) | protein_length=10329 | sequence_SO=chromosome | SO=protein_coding_gene | is_pseudo=false	0.006	2.825	0	2	3	1	10329	1099.9	8.46	7.2	2																				High	High	High	High	High	High	High	High	High	High	1
1.87569e+18	FALSE	High	IsMasterProtein	TGGT1_275470-t26_1-p1	transcript=TGGT1_275470-t26_1 | gene=TGGT1_275470 | organism=Toxoplasma_gondii_GT1 | gene_product=Dense granule protein GRA15 [Source:UniProtKB/TrEMBL;Acc:S7W510] | transcript_product=dense granule protein GRA15 | location=TGGT1_chrX:7172933-7174840(+) | protein_length=635 | sequence_SO=chromosome | SO=protein_coding_gene | is_pseudo=false	0.001	4.528	3	1	1	1	635	66.5	7.77	2.97	1																				High	High	High	High	High	High	High	High	Not Found	High	1
-6.3764e+18	FALSE	High	IsMasterProtein	TGGT1_251890-t26_1-p1	transcript=TGGT1_251890-t26_1 | gene=TGGT1_251890 | organism=Toxoplasma_gondii_GT1 | gene_product=hypothetical protein | transcript_product=hypothetical protein | location=TGGT1_chrXII:5566860-5575541(-) | protein_length=1667 | sequence_SO=chromosome | SO=protein_coding_gene | is_pseudo=false	0.001	4.887	1	1	1	1	1667	180.7	6.65	3.77	1																				High	High	High	High	High	High	High	High	Not Found	High	1
1.7702e+18	FALSE	High	IsMasterProtein	TGGT1_247780-t26_1-p1	transcript=TGGT1_247780-t26_1 | gene=TGGT1_247780 | organism=Toxoplasma_gondii_GT1 | gene_product=hypothetical protein | transcript_product=hypothetical protein | location=TGGT1_chrXII:3515889-3518645(-) | protein_length=267 | sequence_SO=chromosome | SO=protein_coding_gene | is_pseudo=false	0.003	3.553	3	1	1	1	267	29	7.12	2.99	1																				High	High	High	High	High	High	High	High	High	High	1
6.50366e+18	FALSE	Medium	IsMasterProtein	TGGT1_224830-t26_1-p1	transcript=TGGT1_224830-t26_1 | gene=TGGT1_224830 | organism=Toxoplasma_gondii_GT1 | gene_product=hypothetical protein | transcript_product=hypothetical protein | location=TGGT1_chrX:2712917-2718606(-) | protein_length=1114 | sequence_SO=chromosome | SO=protein_coding_gene | is_pseudo=false	0.033	1.533	1	1	1	1	1114	121	8.22	1.81	1																				High	High	High	High	High	High	High	High	High	High	1
-1.30351e+18	FALSE	Medium	IsMasterProtein	TGGT1_249550-t26_1-p1	transcript=TGGT1_249550-t26_1 | gene=TGGT1_249550 | organism=Toxoplasma_gondii_GT1 | gene_product=hypothetical protein | transcript_product=hypothetical protein | location=TGGT1_chrXII:4556908-4566751(+) | protein_length=1813 | sequence_SO=chromosome | SO=protein_coding_gene | is_pseudo=false	0.011	2.302	0	1	1	1	1813	201	8.1	2.41	1																				High	High	High	High	High	High	High	High	High	High	1
8.622e+18	FALSE	High	IsMasterProtein	TGGT1_225820-t26_1-p1	transcript=TGGT1_225820-t26_1 | gene=TGGT1_225820 | organism=Toxoplasma_gondii_GT1 | gene_product=hypothetical protein | transcript_product=hypothetical protein | location=TGGT1_chrX:1932669-1934201(-) | protein_length=510 | sequence_SO=chromosome | SO=protein_coding_gene | is_pseudo=false	0.003	3.683	3	1	1	1	510	54.1	5.73	3.05	1																				High	High	High	High	High	High	High	High	High	High	1
-1.3592e+18	FALSE	Medium	IsMasterProtein	TGGT1_249702-t26_1-p1	transcript=TGGT1_249702-t26_1 | gene=TGGT1_249702 | organism=Toxoplasma_gondii_GT1 | gene_product=Putative MC family transporter [Source:UniProtKB/TrEMBL;Acc:S7W8X1] | transcript_product=putative MC family transporter | location=TGGT1_chrXII:4680757-4684360(+) | protein_length=287 | sequence_SO=chromosome | SO=protein_coding_gene | is_pseudo=false	0.011	2.286	3	1	1	1	287	31.2	9.82	2.19	1																				High	High	High	High	High	High	High	High	High	High	1
-1.43571e+18	FALSE	Low	IsMasterProtein	TGGT1_214880-t26_1-p1	transcript=TGGT1_214880-t26_1 | gene=TGGT1_214880 | organism=Toxoplasma_gondii_GT1 | gene_product=hypothetical protein | transcript_product=hypothetical protein | location=TGGT1_chrX:6454346-6458141(-) | protein_length=931 | sequence_SO=chromosome | SO=protein_coding_gene | is_pseudo=false	0.053	1.265	1	1	1	1	931	98.1	7.24	2.07	1																				High	High	High	High	High	High	High	High	High	High	1
2.757e+18	FALSE	High	IsMasterProtein	TGGT1_224590-t26_1-p1	transcript=TGGT1_224590-t26_1 | gene=TGGT1_224590 | organism=Toxoplasma_gondii_GT1 | gene_product=DNA-directed RNA polymerase III POLR3C [Source:UniProtKB/TrEMBL;Acc:S7UWK9] | transcript_product=DNA-directed RNA polymerase III POLR3C | location=TGGT1_chrX:2861579-2869181(+) | protein_length=823 | sequence_SO=chromosome | SO=protein_coding_gene | is_pseudo=false	0.001	5.977	2	1	1	1	823	88.6	8.41	4.61	1																				High	High	High	High	High	High	High	High	High	High	1
7.92514e+18	FALSE	High	IsMasterProtein	TGGT1_258160-t26_1-p1	transcript=TGGT1_258160-t26_1 | gene=TGGT1_258160 | organism=Toxoplasma_gondii_GT1 | gene_product=ATP-dependent (S)-NAD(P)H-hydrate dehydratase [Source:UniProtKB/TrEMBL;Acc:S7UYL9] | transcript_product=carbohydrate kinase | location=TGGT1_chrVIIb:3507787-3511764(+) | protein_length=508 | sequence_SO=chromosome | SO=protein_coding_gene | is_pseudo=false	0	7.112	4	1	1	1	508	54.8	7.05	3.86	1																				High	High	High	High	High	High	High	High	High	High	1
-7.4654e+18	FALSE	High	IsMasterProtein	TGGT1_239590-t26_1-p1	transcript=TGGT1_239590-t26_1 | gene=TGGT1_239590 | organism=Toxoplasma_gondii_GT1 | gene_product=WD_REPEATS_REGION domain-containing protein [Source:UniProtKB/TrEMBL;Acc:S7US24] | transcript_product=WD domain, G-beta repeat-containing protein | location=TGGT1_chrVI:776318-783150(-) | protein_length=684 | sequence_SO=chromosome | SO=protein_coding_gene | is_pseudo=false	0.003	3.78	2	1	2	1	684	74.8	7.64	5.11	1																				High	High	High	High	High	High	High	High	High	High	1
-3.06289e+18	FALSE	High	IsMasterProtein	TGGT1_262030-t26_1-p1	transcript=TGGT1_262030-t26_1 | gene=TGGT1_262030 | organism=Toxoplasma_gondii_GT1 | gene_product=ALG6, ALG8 glycosyltransferase family protein [Source:UniProtKB/TrEMBL;Acc:S7W6K5] | transcript_product=ALG6, ALG8 glycosyltransferase family protein | location=TGGT1_chrVIIb:1390723-1397986(-) | protein_length=1580 | sequence_SO=chromosome | SO=protein_coding_gene | is_pseudo=false	0.003	3.694	1	1	1	1	1580	174.7	7.91	3.65	1																				High	High	High	High	High	High	High	High	High	High	1
-3.20851e+18	FALSE	High	IsMasterProtein	TGGT1_289760-t26_1-p1	transcript=TGGT1_289760-t26_1 | gene=TGGT1_289760 | organism=Toxoplasma_gondii_GT1 | gene_product=hypothetical protein | transcript_product=hypothetical protein | location=TGGT1_chrIX:3239408-3242116(-) | protein_length=902 | sequence_SO=chromosome | SO=protein_coding_gene | is_pseudo=false	0	11.238	3	1	1	1	902	96.4	8.4	6.28	1																				High	High	High	High	High	High	High	High	High	High	1
2.70014e+18	FALSE	Medium	IsMasterProtein	TGGT1_266010-t26_1-p1	transcript=TGGT1_266010-t26_1 | gene=TGGT1_266010 | organism=Toxoplasma_gondii_GT1 | gene_product=PI3K/PI4K domain-containing protein [Source:UniProtKB/TrEMBL;Acc:S7UHW0] | transcript_product=phosphatidylinositol 3- and 4-kinase | location=TGGT1_chrIX:1173283-1210213(+) | protein_length=8881 | sequence_SO=chromosome | SO=protein_coding_gene | is_pseudo=false	0.012	2.267	0	1	1	1	8881	964.9	6.87	2.67	1																				High	High	High	High	High	High	High	High	High	High	1
5.11638e+18	FALSE	High	IsMasterProtein	TGGT1_225000-t26_1-p1	transcript=TGGT1_225000-t26_1 | gene=TGGT1_225000 | organism=Toxoplasma_gondii_GT1 | gene_product=hypothetical protein | transcript_product=hypothetical protein | location=TGGT1_chrX:2508309-2515473(-) | protein_length=1474 | sequence_SO=chromosome | SO=protein_coding_gene | is_pseudo=false	0.002	4.133	1	1	1	1	1474	154.6	9.11	3.08	1																				High	High	High	High	High	High	High	High	High	High	1
8.9971e+18	FALSE	Medium	IsMasterProtein	TGGT1_255180-t26_1-p1	transcript=TGGT1_255180-t26_1 | gene=TGGT1_255180 | organism=Toxoplasma_gondii_GT1 | gene_product=USP domain-containing protein [Source:UniProtKB/TrEMBL;Acc:S7V2E3] | transcript_product=ubiquitin carboxyl-terminal hydrolase | location=TGGT1_chrVIIb:4936012-4955378(-) | protein_length=4218 | sequence_SO=chromosome | SO=protein_coding_gene | is_pseudo=false	0.018	1.899	0	1	1	1	4218	453.9	5.78	0	1																				High	High	High	High	High	High	High	High	High	High	1
-1.45415e+18	FALSE	Medium	IsMasterProtein	TGGT1_216435-t26_1-p1	transcript=TGGT1_216435-t26_1 | gene=TGGT1_216435 | organism=Toxoplasma_gondii_GT1 | gene_product=hypothetical protein | transcript_product=hypothetical protein | location=TGGT1_chrXI:6068037-6070827(+) | protein_length=350 | sequence_SO=chromosome | SO=protein_coding_gene | is_pseudo=false	0.012	2.193	2	1	1	1	350	38.3	10.49	2.05	1																				High	High	High	High	High	High	High	High	High	High	1
6.53915e+18	FALSE	Medium	IsMasterProtein	TGGT1_314460-t26_1-p1	transcript=TGGT1_314460-t26_1 | gene=TGGT1_314460 | organism=Toxoplasma_gondii_GT1 | gene_product=hypothetical protein | transcript_product=hypothetical protein | location=TGGT1_chrXI:4077809-4078864(-) | protein_length=351 | sequence_SO=chromosome | SO=protein_coding_gene | is_pseudo=false	0.034	1.529	2	1	2	1	351	38.3	9.94	0	1																				High	High	High	High	High	High	High	High	High	High	1
2.6198e+18	FALSE	Medium	IsMasterProtein	TGGT1_320760-t26_1-p1	transcript=TGGT1_320760-t26_1 | gene=TGGT1_320760 | organism=Toxoplasma_gondii_GT1 | gene_product=hypothetical protein | transcript_product=hypothetical protein | location=TGGT1_chrIV:35039-39691(-) | protein_length=357 | sequence_SO=chromosome | SO=protein_coding_gene | is_pseudo=false	0.018	1.902	3	1	1	1	357	39.4	9.54	2.21	1																				High	High	High	High	High	High	High	High	High	High	1
-6.94485e+18	FALSE	High	IsMasterProtein	TGGT1_287040-t26_1-p1	transcript=TGGT1_287040-t26_1 | gene=TGGT1_287040 | organism=Toxoplasma_gondii_GT1 | gene_product=hypothetical protein | transcript_product=hypothetical protein | location=TGGT1_chrV:1431859-1433429(+) | protein_length=336 | sequence_SO=chromosome | SO=protein_coding_gene | is_pseudo=false	0.002	4.296	3	1	2	1	336	35	4.23	5.04	1																				High	High	High	High	High	High	High	High	High	High	1
-5.06331e+18	FALSE	High	IsMasterProtein	TGGT1_259200B-t26_1-p1	transcript=TGGT1_259200B-t26_1 | gene=TGGT1_259200B | organism=Toxoplasma_gondii_GT1 | gene_product=Na+/H+ exchanger NHE1 [Source:UniProtKB/TrEMBL;Acc:S7WEL3] | transcript_product=Na+/H+ exchanger NHE1 | location=TGGT1_chrVIIb:2842786-2849857(-) | protein_length=1450 | sequence_SO=chromosome | SO=protein_coding_gene | is_pseudo=false	0.003	3.858	2	2	2	2	1450	156.8	9.11	5.06	2																				High	High	High	High	High	High	High	High	High	High	1
-6.31622e+18	FALSE	High	IsMasterProtein	TGGT1_290960-t26_1-p1	transcript=TGGT1_290960-t26_1 | gene=TGGT1_290960 | organism=Toxoplasma_gondii_GT1 | gene_product=CBM20 domain-containing protein [Source:UniProtKB/TrEMBL;Acc:S7W4G5] | transcript_product=pyruvate phosphate dikinase, pep/pyruvate binding domain-containing protein | location=TGGT1_chrIX:3792377-3808924(+) | protein_length=1239 | sequence_SO=chromosome | SO=protein_coding_gene | is_pseudo=false	0.001	5.603	1	1	1	1	1239	135.8	6.25	2.93	1																				High	High	High	High	High	High	High	High	High	High	1
2.44163e+18	FALSE	High	IsMasterProtein	TGGT1_283878-t26_1-p1	transcript=TGGT1_283878-t26_1 | gene=TGGT1_283878 | organism=Toxoplasma_gondii_GT1 | gene_product=RRM domain-containing protein [Source:UniProtKB/TrEMBL;Acc:S7UNP7] | transcript_product=RNA recognition motif-containing protein | location=TGGT1_chrV:2720401-2725785(+) | protein_length=666 | sequence_SO=chromosome | SO=protein_coding_gene | is_pseudo=false	0.006	2.872	2	1	1	1	666	72.6	10.29	2.1	1																				High	High	High	High	High	High	High	High	High	High	1
-3.31235e+18	FALSE	High	IsMasterProtein	TGGT1_201520-t26_1-p1	transcript=TGGT1_201520-t26_1 | gene=TGGT1_201520 | organism=Toxoplasma_gondii_GT1 | gene_product=PPM-type phosphatase domain-containing protein [Source:UniProtKB/TrEMBL;Acc:A0A125YGU4] | transcript_product=protein phosphatase 2C domain-containing protein | location=TGGT1_chrVIIa:3796769-3798550(+) | protein_length=232 | sequence_SO=chromosome | SO=protein_coding_gene | is_pseudo=false	0.001	6.761	5	1	1	1	232	26.4	7.83	2.88	1																				High	High	High	High	High	High	High	High	High	High	1
5.00075e+18	FALSE	Medium	IsMasterProtein	TGGT1_312940-t26_1-p1	transcript=TGGT1_312940-t26_1 | gene=TGGT1_312940 | organism=Toxoplasma_gondii_GT1 | gene_product=hypothetical protein | transcript_product=hypothetical protein | location=TGGT1_chrXI:2953739-2955098(-) | protein_length=109 | sequence_SO=chromosome | SO=protein_coding_gene | is_pseudo=false	0.011	2.353	10	1	3	1	109	11.7	9.29	8.36	1																				High	High	High	High	High	High	High	High	High	High	1
1.73295e+18	FALSE	Medium	IsMasterProtein	TGGT1_290630-t26_1-p1	transcript=TGGT1_290630-t26_1 | gene=TGGT1_290630 | organism=Toxoplasma_gondii_GT1 | gene_product=AP2/ERF domain-containing protein [Source:UniProtKB/TrEMBL;Acc:S7UP83] | transcript_product=AP2 domain transcription factor AP2IX-7 | location=TGGT1_chrIX:3593432-3601897(+) | protein_length=2671 | sequence_SO=chromosome | SO=protein_coding_gene | is_pseudo=false	0.011	2.3	0	1	1	1	2671	278.5	8.21	0	1																				Not Found	High	High	High	High	High	High	High	Not Found	Not Found	1
6.46654e+18	FALSE	High	IsMasterProtein	TGGT1_273445-t26_1-p1	transcript=TGGT1_273445-t26_1 | gene=TGGT1_273445 | organism=Toxoplasma_gondii_GT1 | gene_product=SufB/sufD domain-containing protein [Source:UniProtKB/TrEMBL;Acc:S7V472] | transcript_product=sufB/sufD domain-containing protein | location=TGGT1_chrVIII:3498826-3510099(-) | protein_length=1860 | sequence_SO=chromosome | SO=protein_coding_gene | is_pseudo=false	0.001	5.919	1	1	1	1	1860	202	8.53	4.06	1																				High	High	High	High	High	High	High	High	High	High	1
7.33606e+18	FALSE	Low	IsMasterProtein	TGGT1_305230-t26_1-p1	transcript=TGGT1_305230-t26_1 | gene=TGGT1_305230 | organism=Toxoplasma_gondii_GT1 | gene_product=hypothetical protein | transcript_product=hypothetical protein | location=TGGT1_chrIX:5078176-5083410(-) | protein_length=1744 | sequence_SO=chromosome | SO=protein_coding_gene | is_pseudo=false	0.069	1.108	1	1	1	1	1744	194.1	5.48	0	1																				High	High	High	High	High	High	High	High	Not Found	High	1
-2.48276e+18	FALSE	Medium	IsMasterProtein	TGGT1_292190-t26_1-p1	transcript=TGGT1_292190-t26_1 | gene=TGGT1_292190 | organism=Toxoplasma_gondii_GT1 | gene_product=hypothetical protein | transcript_product=hypothetical protein | location=TGGT1_chrIX:4401858-4407161(-) | protein_length=517 | sequence_SO=chromosome | SO=protein_coding_gene | is_pseudo=false	0.022	1.774	2	1	2	1	517	57.5	9.57	2.08	1																				High	High	High	High	High	High	High	High	High	High	1
-3.59442e+18	FALSE	High	IsMasterProtein	TGGT1_213890-t26_1-p1	transcript=TGGT1_213890-t26_1 | gene=TGGT1_213890 | organism=Toxoplasma_gondii_GT1 | gene_product=SANT domain-containing protein [Source:UniProtKB/TrEMBL;Acc:S7UPD1] | transcript_product=Myb family DNA-binding domain-containing protein | location=TGGT1_chrV:1272830-1281627(+) | protein_length=1129 | sequence_SO=chromosome | SO=protein_coding_gene | is_pseudo=false	0	9.325	2	2	2	2	1129	118.2	9.23	6.74	2																				High	High	High	High	High	High	High	High	High	High	1
-3.59456e+18	FALSE	Medium	IsMasterProtein	TGGT1_313180-t26_1-p1	transcript=TGGT1_313180-t26_1 | gene=TGGT1_313180 | organism=Toxoplasma_gondii_GT1 | gene_product=Protein kinase domain-containing protein [Source:UniProtKB/TrEMBL;Acc:S7UT92] | transcript_product=putative cell-cycle-associated protein kinase PRP4 | location=TGGT1_chrXI:3115853-3121175(-) | protein_length=928 | sequence_SO=chromosome | SO=protein_coding_gene | is_pseudo=false	0.038	1.458	1	1	1	1	928	106.6	8.66	0	1																				High	High	High	High	High	High	High	High	High	High	1
-2.92751e+17	FALSE	Medium	IsMasterProtein	TGGT1_267775-t26_1-p1	transcript=TGGT1_267775-t26_1 | gene=TGGT1_267775 | organism=Toxoplasma_gondii_GT1 | gene_product=hypothetical protein | transcript_product=hypothetical protein | location=TGGT1_chrIX:198142-204579(+) | protein_length=842 | sequence_SO=chromosome | SO=protein_coding_gene | is_pseudo=false	0.012	2.275	2	1	1	1	842	90.5	9.26	3.57	1																				High	High	High	High	High	High	High	High	High	High	1
-2.59696e+17	FALSE	Medium	IsMasterProtein	TGGT1_224490-t26_1-p1	transcript=TGGT1_224490-t26_1 | gene=TGGT1_224490 | organism=Toxoplasma_gondii_GT1 | gene_product=Polyprenyl synthetase superfamily protein [Source:UniProtKB/TrEMBL;Acc:S7W4Y7] | transcript_product=polyprenyl synthetase superfamily protein | location=TGGT1_chrX:2932681-2938226(+) | protein_length=646 | sequence_SO=chromosome | SO=protein_coding_gene | is_pseudo=false	0.013	2.133	1	1	1	1	646	69.5	8.43	2.13	1																				High	High	High	High	High	High	High	High	High	High	1
7.97435e+17	FALSE	Low	IsMasterProtein	TGGT1_231430-t26_1-p1	transcript=TGGT1_231430-t26_1 | gene=TGGT1_231430 | organism=Toxoplasma_gondii_GT1 | gene_product=Putative oligosaccharyl transferase stt3 protein [Source:UniProtKB/TrEMBL;Acc:S7WBT5] | transcript_product=putative oligosaccharyl transferase stt3 protein | location=TGGT1_chrVIII:1410150-1416446(-) | protein_length=753 | sequence_SO=chromosome | SO=protein_coding_gene | is_pseudo=false	0.079	1.066	1	1	1	1	753	84	9.09	1.98	1																				High	High	High	High	High	High	High	High	High	High	1
-6.58049e+18	FALSE	Medium	IsMasterProtein	TGGT1_256830-t26_1-p1	transcript=TGGT1_256830-t26_1 | gene=TGGT1_256830 | organism=Toxoplasma_gondii_GT1 | gene_product=SAC domain-containing protein [Source:UniProtKB/TrEMBL;Acc:S7WF98] | transcript_product=SacI domain-containing protein | location=TGGT1_chrVIIb:4347042-4360097(-) | protein_length=2259 | sequence_SO=chromosome | SO=protein_coding_gene | is_pseudo=false	0.017	1.972	0	1	3	1	2259	245.4	7.9	4.84	1																				High	High	High	High	High	High	High	High	High	High	1
6.15528e+17	FALSE	Medium	IsMasterProtein	TGGT1_247920-t26_1-p1	transcript=TGGT1_247920-t26_1 | gene=TGGT1_247920 | organism=Toxoplasma_gondii_GT1 | gene_product=Methyltransf_11 domain-containing protein [Source:UniProtKB/TrEMBL;Acc:S7WHA6] | transcript_product=methyltransferase domain-containing protein | location=TGGT1_chrXII:3550784-3555402(-) | protein_length=282 | sequence_SO=chromosome | SO=protein_coding_gene | is_pseudo=false	0.043	1.372	4	1	1	1	282	31.4	9.29	0	1																				High	High	High	High	High	High	High	High	High	High	1
6.17928e+18	FALSE	High	IsMasterProtein	TGGT1_283730-t26_1-p1	transcript=TGGT1_283730-t26_1 | gene=TGGT1_283730 | organism=Toxoplasma_gondii_GT1 | gene_product=Transmembrane 9 superfamily member [Source:UniProtKB/TrEMBL;Acc:A0A125YSL5] | transcript_product=endomembrane protein 70 subfamily protein | location=TGGT1_chrV:2839553-2847121(-) | protein_length=674 | sequence_SO=chromosome | SO=protein_coding_gene | is_pseudo=false	0.006	2.889	3	1	1	1	674	76.3	8.16	3.15	1																				High	High	High	High	High	High	High	High	High	High	1
5.82057e+18	FALSE	Low	IsMasterProtein	TGGT1_204350-t26_1-p1	transcript=TGGT1_204350-t26_1 | gene=TGGT1_204350 | organism=Toxoplasma_gondii_GT1 | gene_product=hypothetical protein | transcript_product=hypothetical protein | location=TGGT1_chrVIIa:1760591-1767465(-) | protein_length=1343 | sequence_SO=chromosome | SO=protein_coding_gene | is_pseudo=false	0.057	1.226	1	1	1	1	1343	147	7.91	0	1																				High	High	High	High	High	High	High	High	High	High	1
-3.76322e+18	FALSE	High	IsMasterProtein	TGGT1_306490-t26_1-p1	transcript=TGGT1_306490-t26_1 | gene=TGGT1_306490 | organism=Toxoplasma_gondii_GT1 | gene_product=BSD domain-containing protein [Source:UniProtKB/TrEMBL;Acc:S7UIF3] | transcript_product=hypothetical protein | location=TGGT1_chrIX:5908753-5912719(-) | protein_length=1117 | sequence_SO=chromosome | SO=protein_coding_gene | is_pseudo=false	0.006	2.816	1	1	1	1	1117	120.8	6.43	2.17	1																				High	High	High	High	High	High	High	High	High	High	1
5.88252e+18	FALSE	High	IsMasterProtein	TGGT1_232610-t26_1-p1	transcript=TGGT1_232610-t26_1 | gene=TGGT1_232610 | organism=Toxoplasma_gondii_GT1 | gene_product=Histone acetyltransferase subunit nua4 protein [Source:UniProtKB/TrEMBL;Acc:A0A125YNQ6] | transcript_product=histone acetyltransferase subunit nua4 protein | location=TGGT1_chrVIII:2186346-2188357(-) | protein_length=241 | sequence_SO=chromosome | SO=protein_coding_gene | is_pseudo=false	0.003	3.554	5	1	1	1	241	25.2	9.06	2.6	1																				High	High	High	High	High	High	High	High	High	High	1
-4.0277e+18	FALSE	High	IsMasterProtein	TGGT1_201630A-t26_1-p1	transcript=TGGT1_201630A-t26_1 | gene=TGGT1_201630A | organism=Toxoplasma_gondii_GT1 | gene_product=Protein phosphatase 2C domain-containing protein [Source:UniProtKB/TrEMBL;Acc:S7WB07] | transcript_product=protein phosphatase 2C domain-containing protein | location=TGGT1_chrVIIa:3786202-3788119(+) | protein_length=115 | sequence_SO=chromosome | SO=protein_coding_gene | is_pseudo=false	0.001	6.052	17	1	1	1	115	12.4	8.98	4.19	1																				High	High	High	High	High	High	High	High	High	High	1
8.83479e+18	FALSE	Medium	IsMasterProtein	TGGT1_218200-t26_1-p1	transcript=TGGT1_218200-t26_1 | gene=TGGT1_218200 | organism=Toxoplasma_gondii_GT1 | gene_product=UDP-sugar pyrophospharylase [Source:UniProtKB/TrEMBL;Acc:S7WA78] | transcript_product=UDP-sugar pyrophospharylase | location=TGGT1_chrXII:1640365-1645988(-) | protein_length=623 | sequence_SO=chromosome | SO=protein_coding_gene | is_pseudo=false	0.036	1.484	2	1	2	1	623	67.9	6.43	0	1																				High	High	High	High	High	High	High	High	High	High	1
-8.26044e+18	FALSE	High	IsMasterProtein	TGGT1_251560-t26_1-p1	transcript=TGGT1_251560-t26_1 | gene=TGGT1_251560 | organism=Toxoplasma_gondii_GT1 | gene_product=hypothetical protein | transcript_product=hypothetical protein | location=TGGT1_chrXII:5378101-5383296(+) | protein_length=1731 | sequence_SO=chromosome | SO=protein_coding_gene | is_pseudo=false	0.001	4.796	1	1	2	1	1731	184.4	5.08	5.78	1																				High	Not Found	High	High	High	Not Found	Not Found	Not Found	Not Found	Not Found	1
7.32251e+18	FALSE	Medium	IsMasterProtein	TGGT1_309040-t26_1-p1	transcript=TGGT1_309040-t26_1 | gene=TGGT1_309040 | organism=Toxoplasma_gondii_GT1 | gene_product=SLBP_RNA_bind domain-containing protein [Source:UniProtKB/TrEMBL;Acc:A0A125YYI0] | transcript_product=hypothetical protein | location=TGGT1_chrXI:417449-419299(-) | protein_length=616 | sequence_SO=chromosome | SO=protein_coding_gene | is_pseudo=false	0.022	1.805	1	1	1	1	616	62.9	7.81	1.73	1																				High	High	Not Found	High	High	High	High	High	High	High	1
9.22148e+17	FALSE	High	IsMasterProtein	TGGT1_238230-t26_1-p1	transcript=TGGT1_238230-t26_1 | gene=TGGT1_238230 | organism=Toxoplasma_gondii_GT1 | gene_product=DBR1 domain-containing protein [Source:UniProtKB/TrEMBL;Acc:S7URU5] | transcript_product=Ser/Thr phosphatase family protein | location=TGGT1_chrVI:140425-147185(+) | protein_length=496 | sequence_SO=chromosome | SO=protein_coding_gene | is_pseudo=false	0.001	5.502	3	1	3	1	496	55.5	5.48	6.97	1																				High	High	High	High	High	High	High	High	High	High	1
-8.45874e+18	FALSE	Medium	IsMasterProtein	TGGT1_275980-t26_1-p1	transcript=TGGT1_275980-t26_1 | gene=TGGT1_275980 | organism=Toxoplasma_gondii_GT1 | gene_product=Ubiquinone biosynthesis protein COQ4 homolog, mitochondrial [Source:UniProtKB/TrEMBL;Acc:S7UNL2] | transcript_product=coenzyme q (ubiquinone) biosynthesis protein coq4 protein | location=TGGT1_chrIII:151355-155034(-) | protein_length=434 | sequence_SO=chromosome | SO=protein_coding_gene | is_pseudo=f…	0.014	2.041	2	1	1	1	434	48.3	6.95	0	1																				High	High	High	High	High	High	High	High	High	High	1
1.56585e+18	FALSE	Medium	IsMasterProtein	TGGT1_239680-t26_1-p1	transcript=TGGT1_239680-t26_1 | gene=TGGT1_239680 | organism=Toxoplasma_gondii_GT1 | gene_product=hypothetical protein | transcript_product=hypothetical protein | location=TGGT1_chrVI:820561-824385(-) | protein_length=601 | sequence_SO=chromosome | SO=protein_coding_gene | is_pseudo=false	0.046	1.339	2	1	1	1	601	65.4	7.53	2.57	1																				High	High	High	High	High	High	High	High	High	High	1
8.89418e+18	FALSE	Medium	IsMasterProtein	TGGT1_295850-t26_1-p1	transcript=TGGT1_295850-t26_1 | gene=TGGT1_295850 | organism=Toxoplasma_gondii_GT1 | gene_product=Cyclic nucleotide-binding domain-containing protein [Source:UniProtKB/TrEMBL;Acc:S7VRS7] | transcript_product=cyclic nucleotide-binding domain-containing protein | location=TGGT1_chrIa:1477996-1491633(-) | protein_length=3062 | sequence_SO=chromosome | SO=protein_coding_gene | is_pseudo=false	0.024	1.738	0	1	1	1	3062	331.3	6.48	0	1																				High	High	High	High	High	High	High	High	High	High	1
-8.42965e+18	FALSE	Medium	IsMasterProtein	TGGT1_277790-t26_1-p1	transcript=TGGT1_277790-t26_1 | gene=TGGT1_277790 | organism=Toxoplasma_gondii_GT1 | gene_product=Glutaredoxin domain-containing protein [Source:UniProtKB/TrEMBL;Acc:S7UZY4] | transcript_product=hypothetical protein | location=TGGT1_chrXII:6421384-6429987(-) | protein_length=1442 | sequence_SO=chromosome | SO=protein_coding_gene | is_pseudo=false	0.013	2.125	1	1	1	1	1442	159.1	8.48	0	1																				High	High	High	High	High	Not Found	Not Found	Not Found	High	Not Found	1
-4.62225e+18	FALSE	Low	IsMasterProtein	TGGT1_226010-t26_1-p1	transcript=TGGT1_226010-t26_1 | gene=TGGT1_226010 | organism=Toxoplasma_gondii_GT1 | gene_product=Pterin-4-alpha-carbinolamine dehydratase [Source:UniProtKB/TrEMBL;Acc:A0A125YJC7] | transcript_product=pterin-4-alpha-carbinolamine dehydratase | location=TGGT1_chrX:1778366-1778951(+) | protein_length=104 | sequence_SO=chromosome | SO=protein_coding_gene | is_pseudo=false	0.081	1.056	6	1	2	1	104	11.9	7.14	4.55	1																				High	High	High	High	High	High	High	High	High	High	1
-3.44672e+18	FALSE	High	IsMasterProtein	TGGT1_209090-t26_1-p1	transcript=TGGT1_209090-t26_1 | gene=TGGT1_209090 | organism=Toxoplasma_gondii_GT1 | gene_product=Proteasome maturation factor ump1 protein [Source:UniProtKB/TrEMBL;Acc:A0A125YUZ0] | transcript_product=proteasome maturation factor ump1 protein | location=TGGT1_chrIb:1051009-1051515(+) | protein_length=168 | sequence_SO=chromosome | SO=protein_coding_gene | is_pseudo=false	0.001	5.604	8	1	2	1	168	18.1	6.52	6.67	1																				High	High	High	High	High	High	High	High	High	High	1
1.39362e+18	FALSE	High	IsMasterProtein	TGGT1_319550-t26_1-p1	transcript=TGGT1_319550-t26_1 | gene=TGGT1_319550 | organism=Toxoplasma_gondii_GT1 | gene_product=GDT1 family protein [Source:UniProtKB/TrEMBL;Acc:S7VYN4] | transcript_product=putative membrane protein C17G8.08c | location=TGGT1_chrIV:860678-864817(+) | protein_length=343 | sequence_SO=chromosome | SO=protein_coding_gene | is_pseudo=false	0	9.128	7	2	3	1	343	36.2	5.81	7.96	2																				High	High	High	High	High	High	High	High	High	High	1
-1.00068e+18	FALSE	Medium	IsMasterProtein	TGGT1_288340-t26_1-p1	transcript=TGGT1_288340-t26_1 | gene=TGGT1_288340 | organism=Toxoplasma_gondii_GT1 | gene_product=UBX domain-containing protein [Source:UniProtKB/TrEMBL;Acc:S7UQ83] | transcript_product=UBX domain-containing protein | location=TGGT1_chrIX:2267640-2273138(+) | protein_length=492 | sequence_SO=chromosome | SO=protein_coding_gene | is_pseudo=false	0.028	1.685	2	1	1	1	492	54.3	5.72	0	1																				High	High	High	High	High	High	High	High	High	High	1
-9.9991e+17	FALSE	High	IsMasterProtein	TGGT1_205720-t26_1-p1	transcript=TGGT1_205720-t26_1 | gene=TGGT1_205720 | organism=Toxoplasma_gondii_GT1 | gene_product=A_deaminase domain-containing protein [Source:UniProtKB/TrEMBL;Acc:A0A125YQL8] | transcript_product=Adenosine/AMP deaminase domain-containing protein | location=TGGT1_chrVIIa:1110639-1113876(-) | protein_length=366 | sequence_SO=chromosome | SO=protein_coding_gene | is_pseudo=false	0.002	4.254	6	2	2	2	366	41.1	5.53	3.14	2																				High	High	High	High	High	High	High	High	High	High	1
6.36647e+18	FALSE	Medium	IsMasterProtein	TGGT1_312660-t26_1-p1	transcript=TGGT1_312660-t26_1 | gene=TGGT1_312660 | organism=Toxoplasma_gondii_GT1 | gene_product=AB hydrolase-1 domain-containing protein [Source:UniProtKB/TrEMBL;Acc:S7W1N5] | transcript_product=hypothetical protein | location=TGGT1_chrXI:2852480-2856221(+) | protein_length=610 | sequence_SO=chromosome | SO=protein_coding_gene | is_pseudo=false	0.028	1.645	2	1	1	1	610	66	7.08	1.99	1																				High	High	High	High	High	High	High	High	High	High	1
1.14823e+18	FALSE	High	IsMasterProtein	TGGT1_242625-t26_1-p1	transcript=TGGT1_242625-t26_1 | gene=TGGT1_242625 | organism=Toxoplasma_gondii_GT1 | gene_product=VWFA domain-containing protein [Source:UniProtKB/TrEMBL;Acc:S7W745] | transcript_product=ATPase family associated with various cellular activities (AAA) subfamily protein | location=TGGT1_chrVI:2016753-2051315(+) | protein_length=9029 | sequence_SO=chromosome | SO=protein_coding_gene | is_pseudo=false	0.005	3.036	0	1	1	1	9029	975.6	5.8	3.63	1																				High	High	High	High	High	High	High	High	High	High	1
-3.50308e+18	FALSE	High	IsMasterProtein	TGGT1_202540-t26_1-p1	transcript=TGGT1_202540-t26_1 | gene=TGGT1_202540 | organism=Toxoplasma_gondii_GT1 | gene_product=Phosphodiesterase [Source:UniProtKB/TrEMBL;Acc:S7W3K2] | transcript_product=3'5'-cyclic nucleotide phosphodiesterase domain-containing protein | location=TGGT1_chrVIIa:3136489-3147196(-) | protein_length=1670 | sequence_SO=chromosome | SO=protein_coding_gene | is_pseudo=false	0.009	2.412	1	1	1	1	1670	182.3	7.52	0	1																				High	High	High	High	High	High	High	High	High	High	1
-5.71672e+17	FALSE	High	IsMasterProtein	TGGT1_300380-t26_1-p1	transcript=TGGT1_300380-t26_1 | gene=TGGT1_300380 | organism=Toxoplasma_gondii_GT1 | gene_product=Putative endoplasmic reticulum oxidoreductin [Source:UniProtKB/TrEMBL;Acc:S7UGN7] | transcript_product=putative endoplasmic reticulum oxidoreductin | location=TGGT1_chrXII:4365-8351(+) | protein_length=587 | sequence_SO=chromosome | SO=protein_coding_gene | is_pseudo=false	0.01	2.45	2	1	1	1	587	66.3	8.46	3.08	1																				High	High	High	High	High	High	High	High	High	High	1
-4.26055e+17	FALSE	High	IsMasterProtein	TGGT1_203630-t26_1-p1	transcript=TGGT1_203630-t26_1 | gene=TGGT1_203630 | organism=Toxoplasma_gondii_GT1 | gene_product=Ribosomal protein RPL44 [Source:UniProtKB/TrEMBL;Acc:A0A125YNY0] | transcript_product=ribosomal protein RPL44 | location=TGGT1_chrVIIa:2292915-2293974(-) | protein_length=105 | sequence_SO=chromosome | SO=protein_coding_gene | is_pseudo=false	0.009	2.422	8	1	1	1	105	12.1	10.56	2.33	1																				High	High	High	High	High	High	High	High	High	High	1
-6.81049e+18	FALSE	High	IsMasterProtein	TGGT1_281930-t26_1-p1	transcript=TGGT1_281930-t26_1 | gene=TGGT1_281930 | organism=Toxoplasma_gondii_GT1 | gene_product=SAG-related sequence SRS39 [Source:UniProtKB/TrEMBL;Acc:S7WBD3] | transcript_product=SAG-related sequence SRS39 | location=TGGT1_chrVIIa:4180480-4182034(+) | protein_length=324 | sequence_SO=chromosome | SO=protein_coding_gene | is_pseudo=false	0.001	6.548	6	1	2	1	324	33.8	5.38	6.56	1																				High	High	High	High	High	High	High	High	High	High	1
-1.2319e+18	FALSE	Medium	IsMasterProtein	TGGT1_203730-t26_1-p1	transcript=TGGT1_203730-t26_1 | gene=TGGT1_203730 | organism=Toxoplasma_gondii_GT1 | gene_product=hypothetical protein | transcript_product=hypothetical protein | location=TGGT1_chrVIIa:2184667-2192362(+) | protein_length=1246 | sequence_SO=chromosome | SO=protein_coding_gene | is_pseudo=false	0.036	1.488	1	1	1	1	1246	133.4	7.83	2.43	1																				High	High	High	High	High	High	High	High	High	High	1
-1.54405e+18	FALSE	High	IsMasterProtein	TGGT1_314875-t26_1-p1	transcript=TGGT1_314875-t26_1 | gene=TGGT1_314875 | organism=Toxoplasma_gondii_GT1 | gene_product=RIC1 domain-containing protein [Source:UniProtKB/TrEMBL;Acc:S7VV13] | transcript_product=RIC1 protein | location=TGGT1_chrXI:4309741-4323753(-) | protein_length=3793 | sequence_SO=chromosome | SO=protein_coding_gene | is_pseudo=false	0.001	5.667	1	3	4	2	3793	409.4	8.03	9.77	3																				High	High	High	High	High	High	High	High	High	High	1
-5.02827e+18	FALSE	High	IsMasterProtein	TGGT1_239790-t26_1-p1	transcript=TGGT1_239790-t26_1 | gene=TGGT1_239790 | organism=Toxoplasma_gondii_GT1 | gene_product=Pescadillo homolog [Source:UniProtKB/TrEMBL;Acc:S7URT4] | transcript_product=BRCA1 C Terminus (BRCT) domain-containing protein | location=TGGT1_chrVI:904502-910069(+) | protein_length=733 | sequence_SO=chromosome | SO=protein_coding_gene | is_pseudo=false	0.006	2.855	1	1	1	1	733	82.1	5.78	2.96	1																				High	High	High	High	High	High	High	High	High	High	1
4.02749e+18	FALSE	Medium	IsMasterProtein	TGGT1_288260-t26_1-p1	transcript=TGGT1_288260-t26_1 | gene=TGGT1_288260 | organism=Toxoplasma_gondii_GT1 | gene_product=hypothetical protein | transcript_product=hypothetical protein | location=TGGT1_chrIX:2233990-2237318(+) | protein_length=548 | sequence_SO=chromosome | SO=protein_coding_gene | is_pseudo=false	0.014	2.007	3	1	1	1	548	59	7.69	0	1																				High	High	High	High	High	High	High	High	High	High	1	Phospho [Y322; Y325]
3.55911e+18	FALSE	Low	IsMasterProtein	TGGT1_258070-t26_1-p1	transcript=TGGT1_258070-t26_1 | gene=TGGT1_258070 | organism=Toxoplasma_gondii_GT1 | gene_product=hypothetical protein | transcript_product=hypothetical protein | location=TGGT1_chrVIIb:3570890-3578893(-) | protein_length=678 | sequence_SO=chromosome | SO=protein_coding_gene | is_pseudo=false	0.061	1.181	1	1	1	1	678	75.7	8.73	1.88	1																				High	High	High	High	High	High	High	High	High	High	1
7.97127e+18	FALSE	High	IsMasterProtein	TGGT1_250900-t26_1-p1	transcript=TGGT1_250900-t26_1 | gene=TGGT1_250900 | organism=Toxoplasma_gondii_GT1 | gene_product=hypothetical protein | transcript_product=hypothetical protein | location=TGGT1_chrXII:5232023-5237541(+) | protein_length=262 | sequence_SO=chromosome | SO=protein_coding_gene | is_pseudo=false	0	7.373	5	1	1	1	262	29.1	8.85	4.87	1																				High	High	High	High	High	High	High	High	High	High	1
3.62046e+18	FALSE	High	IsMasterProtein	TGGT1_238870-t26_1-p1	transcript=TGGT1_238870-t26_1 | gene=TGGT1_238870 | organism=Toxoplasma_gondii_GT1 | gene_product=hypothetical protein | transcript_product=hypothetical protein | location=TGGT1_chrVI:271417-273372(+) | protein_length=447 | sequence_SO=chromosome | SO=protein_coding_gene | is_pseudo=false	0.009	2.518	3	1	1	1	447	48.6	8.46	3.18	1																				High	High	High	High	High	High	High	High	High	High	1
3.64305e+18	FALSE	High	IsMasterProtein	TGGT1_310930-t26_1-p1	transcript=TGGT1_310930-t26_1 | gene=TGGT1_310930 | organism=Toxoplasma_gondii_GT1 | gene_product=hypothetical protein | transcript_product=hypothetical protein | location=TGGT1_chrXI:1636895-1641854(-) | protein_length=808 | sequence_SO=chromosome | SO=protein_coding_gene | is_pseudo=false	0.003	3.755	1	1	1	1	808	87.5	7.25	2.58	1																				High	High	High	High	High	High	High	High	High	High	1
7.03048e+18	FALSE	High	IsMasterProtein	TGGT1_264220-t26_1-p1	transcript=TGGT1_264220-t26_1 | gene=TGGT1_264220 | organism=Toxoplasma_gondii_GT1 | gene_product=hypothetical protein | transcript_product=hypothetical protein | location=TGGT1_chrVIIb:32858-41126(+) | protein_length=675 | sequence_SO=chromosome | SO=protein_coding_gene | is_pseudo=false	0.003	3.916	1	1	2	1	675	74.7	5.43	4.82	1																				High	High	High	High	High	High	High	High	High	High	1
6.82558e+18	FALSE	High	IsMasterProtein	TGGT1_286220-t26_1-p1	transcript=TGGT1_286220-t26_1 | gene=TGGT1_286220 | organism=Toxoplasma_gondii_GT1 | gene_product=Epimerase domain-containing protein [Source:UniProtKB/TrEMBL;Acc:S7UNW6] | transcript_product=GDP-L-fucose synthetase | location=TGGT1_chrV:1765335-1772356(+) | protein_length=445 | sequence_SO=chromosome | SO=protein_coding_gene | is_pseudo=false	0.003	3.752	2	1	2	1	445	48.8	8.24	5.05	1																				High	High	High	High	High	High	High	High	High	High	1
4.62486e+18	FALSE	Low	IsMasterProtein	TGGT1_271315-t26_1-p1	transcript=TGGT1_271315-t26_1 | gene=TGGT1_271315 | organism=Toxoplasma_gondii_GT1 | gene_product=hypothetical protein | transcript_product=hypothetical protein | location=TGGT1_chrVIII:4567446-4572291(+) | protein_length=384 | sequence_SO=chromosome | SO=protein_coding_gene | is_pseudo=false	0.058	1.214	2	1	1	1	384	44.5	8.4	1.68	1																				High	High	High	High	High	High	High	High	High	High	1
3.93089e+18	FALSE	Medium	IsMasterProtein	TGGT1_313590A-t26_1-p1	transcript=TGGT1_313590A-t26_1 | gene=TGGT1_313590A | organism=Toxoplasma_gondii_GT1 | gene_product=FPL domain-containing protein [Source:UniProtKB/TrEMBL;Acc:S7W9E0] | transcript_product=hypothetical protein | location=TGGT1_chrXI:3460261-3471307(-) | protein_length=1716 | sequence_SO=chromosome | SO=protein_coding_gene | is_pseudo=false	0.018	1.886	1	1	1	1	1716	186.7	8.76	2.04	1																				High	High	High	High	High	High	High	High	High	High	1
-2.14749e+18	FALSE	High	IsMasterProtein	TGGT1_273550-t26_1-p1	transcript=TGGT1_273550-t26_1 | gene=TGGT1_273550 | organism=Toxoplasma_gondii_GT1 | gene_product=hypothetical protein | transcript_product=hypothetical protein | location=TGGT1_chrVIII:3402961-3408018(-) | protein_length=858 | sequence_SO=chromosome | SO=protein_coding_gene | is_pseudo=false	0.007	2.706	1	1	1	1	858	95.9	7.72	2.67	1																				High	High	High	High	High	High	High	High	High	High	1
8.57064e+18	FALSE	High	IsMasterProtein	TGGT1_318480-t26_1-p1	transcript=TGGT1_318480-t26_1 | gene=TGGT1_318480 | organism=Toxoplasma_gondii_GT1 | gene_product=SWI2/SNF2-containing protein RAD5 [Source:UniProtKB/TrEMBL;Acc:S7UKG9] | transcript_product=SWI2/SNF2-containing protein RAD5 | location=TGGT1_chrIV:1228089-1237499(+) | protein_length=1748 | sequence_SO=chromosome | SO=protein_coding_gene | is_pseudo=false	0.009	2.437	0	1	1	1	1748	191.3	7.06	2.25	1																				High	High	High	High	High	High	High	High	High	High	1
6.67327e+18	FALSE	High	IsMasterProtein	TGGT1_215250-t26_1-p1	transcript=TGGT1_215250-t26_1 | gene=TGGT1_215250 | organism=Toxoplasma_gondii_GT1 | gene_product=TPK_B1_binding domain-containing protein [Source:UniProtKB/TrEMBL;Acc:S7UQP1] | transcript_product=thiamin pyrophosphokinase, catalytic domain-containing protein | location=TGGT1_chrX:6729513-6734697(+) | protein_length=816 | sequence_SO=chromosome | SO=protein_coding_gene | is_pseudo=false	0.001	5.478	2	1	1	1	816	89	8.54	3.17	1																				High	High	High	High	High	High	High	High	High	High	1
-2.71254e+18	FALSE	Medium	IsMasterProtein	TGGT1_314720-t26_1-p1	transcript=TGGT1_314720-t26_1 | gene=TGGT1_314720 | organism=Toxoplasma_gondii_GT1 | gene_product=Putative Sedlin protein [Source:UniProtKB/TrEMBL;Acc:S7UM82] | transcript_product=putative Sedlin protein | location=TGGT1_chrXI:4190952-4193477(+) | protein_length=163 | sequence_SO=chromosome | SO=protein_coding_gene | is_pseudo=false	0.036	1.496	5	1	1	1	163	18	4.98	2.55	1																				High	High	High	High	High	High	High	High	High	High	1
-5.35917e+18	FALSE	High	IsMasterProtein	TGGT1_242240-t26_1-p1	transcript=TGGT1_242240-t26_1 | gene=TGGT1_242240 | organism=Toxoplasma_gondii_GT1 | gene_product=Protein kinase domain-containing protein [Source:UniProtKB/TrEMBL;Acc:S7VNH6] | transcript_product=rhoptry kinase family protein ROP19A | location=AAQM03000478:797-2218(+) | protein_length=474 | sequence_SO=contig | SO=protein_coding_gene | is_pseudo=false	0.002	4.016	4	2	4	1	474	51.9	8.72	8.26	2																				High	High	High	High	High	High	High	High	High	High	1
4.04768e+18	FALSE	Medium	IsMasterProtein	TGGT1_318460-t26_1-p1	transcript=TGGT1_318460-t26_1 | gene=TGGT1_318460 | organism=Toxoplasma_gondii_GT1 | gene_product=P-type ATPase of unknown pump specificity (type V) protein | transcript_product=P-type ATPase of unknown pump specificity (type V) protein | location=TGGT1_chrIV:1253650-1260940(-) | protein_length=1484 | sequence_SO=chromosome | SO=protein_coding_gene | is_pseudo=false	0.022	1.782	1	1	1	1	1484	162.7	7.01	2.2	1																				High	High	High	High	High	High	High	High	High	High	1
-6.14491e+18	FALSE	Medium	IsMasterProtein	TGGT1_213010-t26_1-p1	transcript=TGGT1_213010-t26_1 | gene=TGGT1_213010 | organism=Toxoplasma_gondii_GT1 | gene_product=hypothetical protein | transcript_product=hypothetical protein | location=TGGT1_chrV:649058-659140(-) | protein_length=1036 | sequence_SO=chromosome | SO=protein_coding_gene | is_pseudo=false	0.046	1.334	1	1	1	1	1036	114.8	7.59	0	1																				High	High	High	High	High	High	High	High	High	High	1
4.0778e+18	FALSE	Medium	IsMasterProtein	TGGT1_295380-t26_1-p1	transcript=TGGT1_295380-t26_1 | gene=TGGT1_295380 | organism=Toxoplasma_gondii_GT1 | gene_product=hypothetical protein | transcript_product=hypothetical protein | location=TGGT1_chrIa:1773069-1784382(-) | protein_length=1979 | sequence_SO=chromosome | SO=protein_coding_gene | is_pseudo=false	0.028	1.636	0	1	1	1	1979	209.8	7.49	0	1																				High	High	High	Not Found	High	Not Found	Not Found	Not Found	Not Found	High	1
-5.73251e+18	FALSE	Low	IsMasterProtein	TGGT1_314750-t26_1-p1	transcript=TGGT1_314750-t26_1 | gene=TGGT1_314750 | organism=Toxoplasma_gondii_GT1 | gene_product=hypothetical protein | transcript_product=hypothetical protein | location=TGGT1_chrXI:4214855-4217243(-) | protein_length=469 | sequence_SO=chromosome | SO=protein_coding_gene | is_pseudo=false	0.073	1.085	1	1	2	1	469	50	10.14	2.03	1																				High	High	High	High	High	High	High	High	High	High	1
-5.75017e+18	FALSE	Medium	IsMasterProtein	TGGT1_225360-t26_1-p1	transcript=TGGT1_225360-t26_1 | gene=TGGT1_225360 | organism=Toxoplasma_gondii_GT1 | gene_product=hypothetical protein | transcript_product=hypothetical protein | location=TGGT1_chrX:2193035-2196689(-) | protein_length=756 | sequence_SO=chromosome | SO=protein_coding_gene | is_pseudo=false	0.049	1.309	1	1	1	1	756	82.2	6.3	2.26	1																				High	High	High	High	High	High	High	High	High	High	1
6.94204e+18	FALSE	Medium	IsMasterProtein	TGGT1_205562-t26_1-p1	transcript=TGGT1_205562-t26_1 | gene=TGGT1_205562 | organism=Toxoplasma_gondii_GT1 | gene_product=hypothetical protein | transcript_product=hypothetical protein | location=TGGT1_chrVIIa:1219083-1242949(+) | protein_length=5820 | sequence_SO=chromosome | SO=protein_coding_gene | is_pseudo=false	0.028	1.681	0	1	1	1	5820	624.8	6.32	2.14	1																				High	High	High	High	High	High	High	High	High	High	1
-2.00901e+18	FALSE	Medium	IsMasterProtein	TGGT1_285220-t26_1-p1	transcript=TGGT1_285220-t26_1 | gene=TGGT1_285220 | organism=Toxoplasma_gondii_GT1 | gene_product=CAP-Gly domain-containing protein [Source:UniProtKB/TrEMBL;Acc:S7W2Z8] | transcript_product=CAP-Gly domain-containing protein | location=TGGT1_chrV:2368641-2377488(+) | protein_length=781 | sequence_SO=chromosome | SO=protein_coding_gene | is_pseudo=false	0.013	2.062	2	1	1	1	781	84.7	6.05	2.67	1																				High	High	High	High	High	High	High	High	High	High	1
-7.07652e+18	FALSE	High	IsMasterProtein	TGGT1_241160-t26_1-p1	transcript=TGGT1_241160-t26_1 | gene=TGGT1_241160 | organism=Toxoplasma_gondii_GT1 | gene_product=Hemolysin-III related subfamily protein [Source:UniProtKB/TrEMBL;Acc:S7USD6] | transcript_product=hemolysin-III related subfamily protein | location=TGGT1_chrVI:1630066-1632222(+) | protein_length=300 | sequence_SO=chromosome | SO=protein_coding_gene | is_pseudo=false	0.003	3.788	4	1	1	1	300	33.5	8.82	2.62	1																				High	High	High	High	High	High	High	High	High	High	1
-7.2358e+18	FALSE	High	IsMasterProtein	TGGT1_268630-t26_1-p1	transcript=TGGT1_268630-t26_1 | gene=TGGT1_268630 | organism=Toxoplasma_gondii_GT1 | gene_product=DUF155 domain-containing protein [Source:UniProtKB/TrEMBL;Acc:S7WKS2] | transcript_product=YagE family protein | location=TGGT1_chrVIII:6385527-6388016(+) | protein_length=350 | sequence_SO=chromosome | SO=protein_coding_gene | is_pseudo=false	0.003	3.389	4	1	1	1	350	40.7	6.21	0	1																				High	High	High	High	High	High	High	High	High	High	1
-5.76838e+18	FALSE	High	IsMasterProtein	TGGT1_263150-t26_1-p1	transcript=TGGT1_263150-t26_1 | gene=TGGT1_263150 | organism=Toxoplasma_gondii_GT1 | gene_product=TPR_REGION domain-containing protein [Source:UniProtKB/TrEMBL;Acc:A0A125YNK4] | transcript_product=tetratricopeptide repeat-containing protein | location=TGGT1_chrVIIb:731892-735864(+) | protein_length=414 | sequence_SO=chromosome | SO=protein_coding_gene | is_pseudo=false	0.003	3.888	3	1	1	1	414	45.3	4.81	2.87	1																				High	High	High	High	High	High	High	High	High	High	1
8.11158e+18	FALSE	High	IsMasterProtein	TGGT1_232520-t26_1-p1	transcript=TGGT1_232520-t26_1 | gene=TGGT1_232520 | organism=Toxoplasma_gondii_GT1 | gene_product=Brix domain-containing protein [Source:UniProtKB/TrEMBL;Acc:A0A125YQE1] | transcript_product=brix domain-containing protein | location=TGGT1_chrVIII:2131005-2132727(-) | protein_length=401 | sequence_SO=chromosome | SO=protein_coding_gene | is_pseudo=false	0.009	2.505	2	1	1	1	401	43.2	10.04	0	1																				High	High	High	High	High	High	High	High	High	High	1
-5.96774e+18	FALSE	High	IsMasterProtein	TGGT1_294280-t26_1-p1	transcript=TGGT1_294280-t26_1 | gene=TGGT1_294280 | organism=Toxoplasma_gondii_GT1 | gene_product=HECT domain-containing protein [Source:UniProtKB/TrEMBL;Acc:A0A125YKM0] | transcript_product=putative E3 ubiquitin-protein ligase | location=TGGT1_chrIa:756789-765902(-) | protein_length=1021 | sequence_SO=chromosome | SO=protein_coding_gene | is_pseudo=false	0.001	6.822	1	1	1	1	1021	113.4	5.43	3.98	1																				High	High	High	High	High	High	High	High	High	High	1
-5.84971e+18	FALSE	High	IsMasterProtein	TGGT1_306895-t26_1-p1	transcript=TGGT1_306895-t26_1 | gene=TGGT1_306895 | organism=Toxoplasma_gondii_GT1 | gene_product=hypothetical protein | transcript_product=hypothetical protein | location=TGGT1_chrXI:186031-186540(-) | protein_length=169 | sequence_SO=chromosome | SO=protein_coding_gene | is_pseudo=false	0.001	5.592	8	1	1	1	169	18.2	7.21	2.58	1																				High	High	High	High	High	High	High	High	High	High	1
4.23703e+18	FALSE	High	IsMasterProtein	TGGT1_206490-t26_1-p1	transcript=TGGT1_206490-t26_1 | gene=TGGT1_206490 | organism=Toxoplasma_gondii_GT1 | gene_product=ICE family protease (Caspase) p20 domain-containing protein [Source:UniProtKB/TrEMBL;Acc:S7UUB4] | transcript_product=ICE family protease (caspase) p20 domain-containing protein | location=TGGT1_chrVIIa:908830-917000(+) | protein_length=742 | sequence_SO=chromosome | SO=protein_coding_gene | is_pseud…	0.003	3.947	3	2	3	2	742	80.3	7.44	4.47	2																				High	High	High	High	High	High	High	High	High	High	1
-6.03842e+18	FALSE	High	IsMasterProtein	TGGT1_313040-t26_1-p1	transcript=TGGT1_313040-t26_1 | gene=TGGT1_313040 | organism=Toxoplasma_gondii_GT1 | gene_product=hypothetical protein | transcript_product=hypothetical protein | location=TGGT1_chrXI:3026132-3027398(-) | protein_length=361 | sequence_SO=chromosome | SO=protein_coding_gene | is_pseudo=false	0.007	2.725	2	1	1	1	361	40	5.83	1.67	1																				High	High	High	High	High	High	High	High	High	High	1
-6.0352e+18	FALSE	High	IsMasterProtein	TGGT1_274100-t26_1-p1	transcript=TGGT1_274100-t26_1 | gene=TGGT1_274100 | organism=Toxoplasma_gondii_GT1 | gene_product=hypothetical protein | transcript_product=hypothetical protein | location=TGGT1_chrVIII:3026268-3028549(-) | protein_length=511 | sequence_SO=chromosome | SO=protein_coding_gene | is_pseudo=false	0	9.267	4	1	1	1	511	56.7	9.35	6.36	1																				High	High	High	High	High	High	High	High	High	High	1
4.4382e+18	FALSE	High	IsMasterProtein	TGGT1_313810-t26_1-p1	transcript=TGGT1_313810-t26_1 | gene=TGGT1_313810 | organism=Toxoplasma_gondii_GT1 | gene_product=TAF8_C domain-containing protein [Source:UniProtKB/TrEMBL;Acc:S7UTJ9] | transcript_product=transcription initiation factor TFIID complex subunit TAF8 | location=TGGT1_chrXI:3665097-3667076(+) | protein_length=659 | sequence_SO=chromosome | SO=protein_coding_gene | is_pseudo=false	0	11.48	6	1	1	1	659	66.9	5.91	6.53	1																				High	High	High	High	High	High	High	High	Not Found	High	1
4.54641e+18	FALSE	Low	IsMasterProtein	TGGT1_235350-t26_1-p1	transcript=TGGT1_235350-t26_1 | gene=TGGT1_235350 | organism=Toxoplasma_gondii_GT1 | gene_product=Cwfj family protein [Source:UniProtKB/TrEMBL;Acc:S7UQS5] | transcript_product=cwfj family protein | location=TGGT1_chrX:4683521-4689257(-) | protein_length=821 | sequence_SO=chromosome | SO=protein_coding_gene | is_pseudo=false	0.069	1.109	1	1	1	1	821	90.7	8.91	0	1																				High	High	High	High	High	High	High	High	High	High	1
-6.99651e+18	FALSE	High	IsMasterProtein	TGGT1_318470-t26_1-p1	transcript=TGGT1_318470-t26_1 | gene=TGGT1_318470 | organism=Toxoplasma_gondii_GT1 | gene_product=AP2 domain transcription factor AP2IV-4 [Source:UniProtKB/TrEMBL;Acc:S7VT90] | transcript_product=AP2 domain transcription factor AP2IV-4 | location=TGGT1_chrIV:1243471-1250691(+) | protein_length=2406 | sequence_SO=chromosome | SO=protein_coding_gene | is_pseudo=false	0.001	4.664	1	1	1	1	2406	250	5.72	2.71	1																				High	High	High	High	High	High	High	High	High	High	1
-2.50173e+18	FALSE	Medium	IsMasterProtein	TGGT1_272650-t26_1-p1	transcript=TGGT1_272650-t26_1 | gene=TGGT1_272650 | organism=Toxoplasma_gondii_GT1 | gene_product=PDEase domain-containing protein [Source:UniProtKB/TrEMBL;Acc:S7V394] | transcript_product=3'5'-cyclic nucleotide phosphodiesterase domain-containing protein | location=TGGT1_chrVIII:3812437-3818063(-) | protein_length=1294 | sequence_SO=chromosome | SO=protein_coding_gene | is_pseudo=false	0.04	1.439	1	1	1	1	1294	141.2	7.14	0	1																				High	High	High	High	High	High	High	High	High	High	1
-1.63241e+18	FALSE	High	IsMasterProtein	TGGT1_254365-t26_1-p1	transcript=TGGT1_254365-t26_1 | gene=TGGT1_254365 | organism=Toxoplasma_gondii_GT1 | gene_product=Phosphatidate cytidylyltransferase [Source:UniProtKB/TrEMBL;Acc:S7W1Z3] | transcript_product=phosphatidate cytidylyltransferase | location=TGGT1_chrIII:1628991-1631247(+) | protein_length=255 | sequence_SO=chromosome | SO=protein_coding_gene | is_pseudo=false	0.001	4.94	4	1	1	1	255	27.5	8.31	2.83	1																				High	High	High	High	High	High	High	High	High	High	1
-1.55834e+18	FALSE	High	IsMasterProtein	TGGT1_215010-t26_1-p1	transcript=TGGT1_215010-t26_1 | gene=TGGT1_215010 | organism=Toxoplasma_gondii_GT1 | gene_product=hypothetical protein | transcript_product=hypothetical protein | location=TGGT1_chrX:6568179-6572484(+) | protein_length=777 | sequence_SO=chromosome | SO=protein_coding_gene | is_pseudo=false	0.005	3.208	2	1	1	1	777	81.6	7.97	3.21	1																				High	High	High	High	High	High	High	High	High	High	1
-1.56061e+18	FALSE	High	IsMasterProtein	TGGT1_300010-t26_1-p1	transcript=TGGT1_300010-t26_1 | gene=TGGT1_300010 | organism=Toxoplasma_gondii_GT1 | gene_product=hypothetical protein | transcript_product=hypothetical protein | location=TGGT1_chrXII:241429-247736(-) | protein_length=400 | sequence_SO=chromosome | SO=protein_coding_gene | is_pseudo=false	0.007	2.618	3	1	1	1	400	45.3	9.35	2.12	1																				High	High	High	High	High	High	High	High	High	High	1
-6.18792e+18	FALSE	Medium	IsMasterProtein	TGGT1_240740-t26_1-p1	transcript=TGGT1_240740-t26_1 | gene=TGGT1_240740 | organism=Toxoplasma_gondii_GT1 | gene_product=Sec1 family protein [Source:UniProtKB/TrEMBL;Acc:S7W0C7] | transcript_product=Sec1 family protein | location=TGGT1_chrVI:1394508-1408204(+) | protein_length=633 | sequence_SO=chromosome | SO=protein_coding_gene | is_pseudo=false	0.029	1.618	2	1	1	1	633	71.8	6.65	0	1																				High	High	High	High	High	High	High	High	High	Not Found	1
4.95529e+18	FALSE	High	IsMasterProtein	TGGT1_299130-t26_1-p1	transcript=TGGT1_299130-t26_1 | gene=TGGT1_299130 | organism=Toxoplasma_gondii_GT1 | gene_product=hypothetical protein | transcript_product=hypothetical protein | location=TGGT1_chrIII:2138776-2151293(-) | protein_length=3218 | sequence_SO=chromosome | SO=protein_coding_gene | is_pseudo=false	0.003	3.651	1	1	1	1	3218	346.9	7.03	3.87	1																				High	High	High	High	High	High	High	High	High	High	1
-6.99004e+18	FALSE	High	IsMasterProtein	TGGT1_305590-t26_1-p1	transcript=TGGT1_305590-t26_1 | gene=TGGT1_305590 | organism=Toxoplasma_gondii_GT1 | gene_product=ABC transporter transmembrane region domain-containing protein [Source:UniProtKB/TrEMBL;Acc:A0A125YP76] | transcript_product=ABC transporter transmembrane region domain-containing protein | location=TGGT1_chrIX:5262343-5272888(+) | protein_length=1883 | sequence_SO=chromosome | SO=protein_coding_gene…	0	11.992	1	1	2	1	1883	205.9	7.2	13.11	1																				High	High	High	High	High	Not Found	High	High	Not Found	High	1
7.96234e+18	FALSE	Medium	IsMasterProtein	TGGT1_297120-t26_1-p1	transcript=TGGT1_297120-t26_1 | gene=TGGT1_297120 | organism=Toxoplasma_gondii_GT1 | gene_product=hypothetical protein | transcript_product=hypothetical protein | location=TGGT1_chrII:1525947-1530326(+) | protein_length=760 | sequence_SO=chromosome | SO=protein_coding_gene | is_pseudo=false	0.043	1.368	1	1	1	1	760	83.4	6.8	1.79	1																				High	High	High	High	High	High	High	High	High	High	1
3.35946e+18	FALSE	Medium	IsMasterProtein	TGGT1_286550-t26_1-p1	transcript=TGGT1_286550-t26_1 | gene=TGGT1_286550 | organism=Toxoplasma_gondii_GT1 | gene_product=RNase_PH domain-containing protein [Source:UniProtKB/TrEMBL;Acc:S7W3A5] | transcript_product=hypothetical protein | location=TGGT1_chrV:1642526-1644017(+) | protein_length=223 | sequence_SO=chromosome | SO=protein_coding_gene | is_pseudo=false	0.012	2.273	4	1	1	1	223	23.9	5.16	2.48	1																				High	High	High	High	High	High	High	High	High	High	1
3.36916e+18	FALSE	Medium	IsMasterProtein	TGGT1_310300-t26_1-p1	transcript=TGGT1_310300-t26_1 | gene=TGGT1_310300 | organism=Toxoplasma_gondii_GT1 | gene_product=hypothetical protein | transcript_product=hypothetical protein | location=TGGT1_chrXI:1203992-1214123(+) | protein_length=930 | sequence_SO=chromosome | SO=protein_coding_gene | is_pseudo=false	0.018	1.887	2	1	1	1	930	100.7	6.39	0	1																				High	High	High	High	High	High	High	High	High	High	1
-1.61334e+18	FALSE	High	IsMasterProtein	TGGT1_210390-t26_1-p1	transcript=TGGT1_210390-t26_1 | gene=TGGT1_210390 | organism=Toxoplasma_gondii_GT1 | gene_product=WD domain, G-beta repeat-containing protein [Source:UniProtKB/TrEMBL;Acc:S7VXB5] | transcript_product=WD domain, G-beta repeat-containing protein | location=TGGT1_chrIX:4620093-4623204(+) | protein_length=549 | sequence_SO=chromosome | SO=protein_coding_gene | is_pseudo=false	0.006	2.842	2	1	1	1	549	58.5	5.94	2.66	1																				High	High	High	High	High	High	High	High	High	High	1
3.38888e+18	FALSE	High	IsMasterProtein	TGGT1_204280-t26_1-p1	transcript=TGGT1_204280-t26_1 | gene=TGGT1_204280 | organism=Toxoplasma_gondii_GT1 | gene_product=Protein kinase domain-containing protein [Source:UniProtKB/TrEMBL;Acc:S7UU58] | transcript_product=putative cell-cycle-associated protein kinase DYRK | location=TGGT1_chrVIIa:1825877-1830412(+) | protein_length=1180 | sequence_SO=chromosome | SO=protein_coding_gene | is_pseudo=false	0.002	4.026	1	1	2	1	1180	128.7	6.13	6.28	1																				High	High	High	High	High	High	High	High	High	High	1
-6.17246e+18	FALSE	High	IsMasterProtein	TGGT1_305080-t26_1-p1	transcript=TGGT1_305080-t26_1 | gene=TGGT1_305080 | organism=Toxoplasma_gondii_GT1 | gene_product=hypothetical protein | transcript_product=hypothetical protein | location=TGGT1_chrIX:4990169-4991035(-) | protein_length=288 | sequence_SO=chromosome | SO=protein_coding_gene | is_pseudo=false	0.001	5.665	8	1	1	1	288	27.6	5.31	4.1	1																				High	High	High	High	High	High	High	High	High	High	1
6.96274e+18	FALSE	High	IsMasterProtein	TGGT1_363940-t26_1-p1	transcript=TGGT1_363940-t26_1 | gene=TGGT1_363940 | organism=Toxoplasma_gondii_GT1 | gene_product=Putative transmembrane protein [Source:UniProtKB/TrEMBL;Acc:S7URB9] | transcript_product=putative transmembrane protein | location=TGGT1_chrX:6170184-6171656(+) | protein_length=490 | sequence_SO=chromosome | SO=protein_coding_gene | is_pseudo=false	0.007	2.629	3	1	1	1	490	52.2	5.66	2.81	1																				High	High	High	High	High	High	High	High	High	High	1
9.09761e+18	FALSE	High	IsMasterProtein	TGGT1_218270-t26_1-p1	transcript=TGGT1_218270-t26_1 | gene=TGGT1_218270 | organism=Toxoplasma_gondii_GT1 | gene_product=hypothetical protein | transcript_product=hypothetical protein | location=TGGT1_chrXII:1575192-1576283(-) | protein_length=363 | sequence_SO=chromosome | SO=protein_coding_gene | is_pseudo=false	0.001	5.046	2	1	1	1	363	39	6.93	2.78	1																				High	High	High	High	High	High	High	High	High	High	1
4.76836e+18	FALSE	High	IsMasterProtein	TGGT1_243390-t26_1-p1	transcript=TGGT1_243390-t26_1 | gene=TGGT1_243390 | organism=Toxoplasma_gondii_GT1 | gene_product=DUF2012 domain-containing protein [Source:UniProtKB/TrEMBL;Acc:S7UEE2] | transcript_product=hypothetical protein | location=TGGT1_chrVI:2520721-2521734(+) | protein_length=337 | sequence_SO=chromosome | SO=protein_coding_gene | is_pseudo=false	0.001	5.066	4	1	1	1	337	36.6	7.21	3.28	1																				High	High	High	High	High	High	High	High	High	High	1
-7.38719e+18	FALSE	High	IsMasterProtein	TGGT1_213740-t26_1-p1	transcript=TGGT1_213740-t26_1 | gene=TGGT1_213740 | organism=Toxoplasma_gondii_GT1 | gene_product=Methyltranfer_dom domain-containing protein [Source:UniProtKB/TrEMBL;Acc:S7UPB0] | transcript_product=hypothetical protein | location=TGGT1_chrV:1141663-1151087(+) | protein_length=842 | sequence_SO=chromosome | SO=protein_coding_gene | is_pseudo=false	0.006	2.816	1	1	1	1	842	91.9	6.47	2.44	1																				High	High	High	High	High	High	High	High	High	High	1
5.13192e+18	FALSE	High	IsMasterProtein	TGGT1_311810-t26_1-p1	transcript=TGGT1_311810-t26_1 | gene=TGGT1_311810 | organism=Toxoplasma_gondii_GT1 | gene_product=hypothetical protein | transcript_product=hypothetical protein | location=TGGT1_chrXI:2263557-2266725(+) | protein_length=778 | sequence_SO=chromosome | SO=protein_coding_gene | is_pseudo=false	0	7.969	3	1	1	1	778	85.9	6.33	4.24	1	2.821	1.508	1.141	1.808	1.479	2.019	1.55	0.842	1.112	3.6	10.1	5.4	4.1	6.5	5.3	7.2	5.6	3	4	High	High	High	High	High	High	High	High	High	High	1
-4.12119e+18	FALSE	High	IsMasterProtein	TGGT1_291010-t26_1-p1	transcript=TGGT1_291010-t26_1 | gene=TGGT1_291010 | organism=Toxoplasma_gondii_GT1 | gene_product=hypothetical protein | transcript_product=hypothetical protein | location=TGGT1_chrIX:3850359-3851009(-) | protein_length=216 | sequence_SO=chromosome | SO=protein_coding_gene | is_pseudo=false	0.001	5.555	10	1	1	1	216	23.3	5.19	2.67	1	1.912	2.616	1.813	2.852	1.798	1.738	1.409	1.177	1.05	4.1	7.8	10.7	7.4	11.7	7.4	7.1	5.8	4.8	4.3	High	High	High	High	High	High	High	High	High	High	1
5.3017e+18	FALSE	High	IsMasterProtein	TGGT1_301480-t26_1-p1	transcript=TGGT1_301480-t26_1 | gene=TGGT1_301480 | organism=Toxoplasma_gondii_GT1 | gene_product=hypothetical protein | transcript_product=hypothetical protein | location=AAQM03000431:3-2012(+) | protein_length=669 | sequence_SO=contig | SO=protein_coding_gene | is_pseudo=false	0.001	6.412	3	1	1	1	669	70.1	4.03	4.24	1	3.79	3.637	1.035	2.573	1.102	1.26	1.56	1.517	2.131	4.5	16.9	16.2	4.6	11.5	4.9	5.6	7	6.8	9.5	High	High	High	High	High	High	High	High	High	High	1
7.17724e+17	FALSE	High	IsMasterProtein	TGGT1_226990-t26_1-p1	transcript=TGGT1_226990-t26_1 | gene=TGGT1_226990 | organism=Toxoplasma_gondii_GT1 | gene_product=hypothetical protein | transcript_product=hypothetical protein | location=TGGT1_chrX:1068028-1070058(-) | protein_length=676 | sequence_SO=chromosome | SO=protein_coding_gene | is_pseudo=false	0.001	6.008	4	1	1	1	676	71.6	10.08	4.5	1	0.92	1.587	1.089	1.24	1.301	1.376	0.861	1.087	1.564	4.6	4.3	7.4	5.1	5.8	6	6.4	4	5	7.3	High	High	High	High	High	High	High	High	High	High	1
4.61252e+18	FALSE	High	IsMasterProtein	TGGT1_289710-t26_1-p1	transcript=TGGT1_289710-t26_1 | gene=TGGT1_289710 | organism=Toxoplasma_gondii_GT1 | gene_product=AP2 domain transcription factor AP2IX-5 [Source:UniProtKB/TrEMBL;Acc:S7VXQ6] | transcript_product=AP2 domain transcription factor AP2IX-5 | location=TGGT1_chrIX:3197843-3204697(+) | protein_length=2284 | sequence_SO=chromosome | SO=protein_coding_gene | is_pseudo=false	0.001	5.605	1	1	1	1	2284	231.7	6.76	2.63	1	1.331	1.663	1.241	1.343	0.831	1.119	0.917	0.833	0.71	4.8	6.3	7.9	5.9	6.4	4	5.3	4.4	4	3.4	High	High	High	High	High	High	High	High	High	High	1
-2.52488e+18	FALSE	High	IsMasterProtein	TGGT1_288190-t26_1-p1	transcript=TGGT1_288190-t26_1 | gene=TGGT1_288190 | organism=Toxoplasma_gondii_GT1 | gene_product=hypothetical protein | transcript_product=hypothetical protein | location=TGGT1_chrIX:2174491-2190662(-) | protein_length=5049 | sequence_SO=chromosome | SO=protein_coding_gene | is_pseudo=false	0	8.289	0	2	2	2	5049	539.9	6.18	6.25	2	1.088	2.082	1.544	1.102	1.238	0.942	0.403	1.153	0.966	5.7	6.2	11.9	8.8	6.3	7.1	5.4	2.3	6.6	5.5	High	High	High	High	High	High	High	High	High	High	1
-3.81843e+18	FALSE	Medium	IsMasterProtein	TGGT1_271460-t26_1-p1	transcript=TGGT1_271460-t26_1 | gene=TGGT1_271460 | organism=Toxoplasma_gondii_GT1 | gene_product=Hydrolase_4 domain-containing protein [Source:UniProtKB/TrEMBL;Acc:S7V3V0] | transcript_product=putative protein c14orf29 | location=TGGT1_chrVIII:4472962-4481955(+) | protein_length=884 | sequence_SO=chromosome | SO=protein_coding_gene | is_pseudo=false	0.022	1.776	1	1	3	1	884	97.6	7.62	0	1	1.129	1.509	0.556	1.31	0.576	1.036	0.726	0.514	0.953	5.8	6.6	8.8	3.2	7.6	3.3	6	4.2	3	5.5	High	High	High	High	High	High	High	High	High	High	1
-7.59209e+17	FALSE	High	IsMasterProtein	TGGT1_262990-t26_1-p1	transcript=TGGT1_262990-t26_1 | gene=TGGT1_262990 | organism=Toxoplasma_gondii_GT1 | gene_product=hypothetical protein | transcript_product=hypothetical protein | location=TGGT1_chrVIIb:851355-857400(-) | protein_length=1634 | sequence_SO=chromosome | SO=protein_coding_gene | is_pseudo=false	0.003	3.752	1	1	1	1	1634	176.1	6.65	2.86	1	1.157	2.233	1.33	1.66	1.159	0.893	0.811	1.428	1.282	6.4	7.4	14.3	8.5	10.6	7.4	5.7	5.2	9.1	8.2	High	High	High	High	High	High	High	High	High	High	1
-1.60099e+18	FALSE	High	IsMasterProtein	TGGT1_253950-t26_1-p1	transcript=TGGT1_253950-t26_1 | gene=TGGT1_253950 | organism=Toxoplasma_gondii_GT1 | gene_product=putative protein fam50a | transcript_product=putative protein fam50a | location=TGGT1_chrIII:1345761-1349757(+) | protein_length=462 | sequence_SO=chromosome | SO=protein_coding_gene | is_pseudo=false	0.002	4.192	3	1	1	1	462	53.1	8.57	3.05	1	1.335	1.124	1.035	1.351	0.955	0.692	0.468	0.319	0.503	6.6	8.8	7.4	6.8	8.9	6.3	4.6	3.1	2.1	3.3	High	High	High	High	High	High	High	High	High	High	1
-1.45743e+18	FALSE	High	IsMasterProtein	TGGT1_203020-t26_1-p1	transcript=TGGT1_203020-t26_1 | gene=TGGT1_203020 | organism=Toxoplasma_gondii_GT1 | gene_product=Ribosome biogenesis GTPase Der protein [Source:UniProtKB/TrEMBL;Acc:S7UV60] | transcript_product=ribosome biogenesis GTPase Der protein | location=TGGT1_chrVIIa:2755996-2762289(+) | protein_length=1125 | sequence_SO=chromosome | SO=protein_coding_gene | is_pseudo=false	0	10.054	2	1	1	1	1125	123.4	8.95	4.11	1	1.313	1.675	0.692	1.132	0.623	0.692	0.606	0.39	0.484	7	9.2	11.7	4.8	7.9	4.3	4.8	4.2	2.7	3.4	High	High	High	High	High	High	High	High	High	High	1
5.9905e+18	FALSE	High	IsMasterProtein	TGGT1_216540-t26_1-p1	transcript=TGGT1_216540-t26_1 | gene=TGGT1_216540 | organism=Toxoplasma_gondii_GT1 | gene_product=Dolichyl-phosphate beta-glucosyltransferase [Source:UniProtKB/TrEMBL;Acc:S7UKX8] | transcript_product=dolichyl-phosphate beta-glucosyltransferase | location=TGGT1_chrXI:6008082-6011078(+) | protein_length=689 | sequence_SO=chromosome | SO=protein_coding_gene | is_pseudo=false	0.001	5.603	3	1	3	1	689	74.3	6.76	11.07	1	0.747	1.174	0.883	1.163	0.643	0.362	0.356	0.669	0.569	7	5.2	8.2	6.2	8.2	4.5	2.5	2.5	4.7	4	High	High	High	High	High	High	High	High	High	High	1
3.18166e+18	FALSE	High	IsMasterProtein	TGGT1_227450-t26_1-p1	transcript=TGGT1_227450-t26_1 | gene=TGGT1_227450 | organism=Toxoplasma_gondii_GT1 | gene_product=Nudix hydrolase domain-containing protein [Source:UniProtKB/TrEMBL;Acc:S7UXE1] | transcript_product=hydrolase, NUDIX family protein | location=TGGT1_chrX:834070-841020(+) | protein_length=2063 | sequence_SO=chromosome | SO=protein_coding_gene | is_pseudo=false	0	8.609	1	1	1	1	2063	216.5	8.31	4.31	1	1.188	0.821	1.096	0.787	0.685	0.6	0.558	0.616	0.506	7.3	8.7	6	8	5.8	5	4.4	4.1	4.5	3.7	High	High	High	High	High	High	High	High	High	High	1
-6.09509e+18	FALSE	High	IsMasterProtein	TGGT1_249860-t26_1-p1	transcript=TGGT1_249860-t26_1 | gene=TGGT1_249860 | organism=Toxoplasma_gondii_GT1 | gene_product=hypothetical protein | transcript_product=hypothetical protein | location=TGGT1_chrXII:4841303-4848762(-) | protein_length=802 | sequence_SO=chromosome | SO=protein_coding_gene | is_pseudo=false	0.001	5.059	1	1	2	1	802	90.2	4.98	6.52	1	1.168	0.465	1.173	0.735	0.381	0.737	0.497	0.67	0.01	7.4	8.7	3.5	8.7	5.5	2.8	5.5	3.7	5		High	High	High	High	High	High	High	High	High	High	1
-5.70693e+18	FALSE	High	IsMasterProtein	TGGT1_254280-t26_1-p1	transcript=TGGT1_254280-t26_1 | gene=TGGT1_254280 | organism=Toxoplasma_gondii_GT1 | gene_product=DNA-directed RNA polymerase III RPC9 [Source:UniProtKB/TrEMBL;Acc:S7UN10] | transcript_product=DNA-directed RNA polymerase III RPC9 | location=TGGT1_chrIII:1552774-1554564(-) | protein_length=467 | sequence_SO=chromosome | SO=protein_coding_gene | is_pseudo=false	0	8.579	5	1	1	1	467	49.5	6.89	5.75	1	1.181	1.626	1.169	0.555	0.816	0.382	0.352	0.518	0.413	7.8	9.2	12.7	9.1	4.3	6.4	3	2.8	4.1	3.2	High	High	High	High	High	High	High	High	High	High	1
8.56283e+17	FALSE	Medium	IsMasterProtein	TGGT1_238080-t26_1-p1	transcript=TGGT1_238080-t26_1 | gene=TGGT1_238080 | organism=Toxoplasma_gondii_GT1 | gene_product=HIT-type domain-containing protein [Source:UniProtKB/TrEMBL;Acc:S7UQX7] | transcript_product=hypothetical protein | location=TGGT1_chrVI:56821-58606(+) | protein_length=431 | sequence_SO=chromosome | SO=protein_coding_gene | is_pseudo=false	0.035	1.518	3	1	1	1	431	47.1	5.08	1.84	1	1.156	1.606	0.966	0.894	1.257	1.131	1.383	1.714	1.212	7.8	9	12.6	7.6	7	9.8	8.8	10.8	13.4	9.5	High	High	High	High	High	High	High	High	High	High	1
6.38998e+18	FALSE	High	IsMasterProtein	TGGT1_301450-t26_1-p1	transcript=TGGT1_301450-t26_1 | gene=TGGT1_301450 | organism=Toxoplasma_gondii_GT1 | gene_product=FG-GAP repeat-containing protein [Source:UniProtKB/TrEMBL;Acc:S7VVX6] | transcript_product=FG-GAP repeat-containing protein | location=TGGT1_chrIV:2376905-2388484(+) | protein_length=1684 | sequence_SO=chromosome | SO=protein_coding_gene | is_pseudo=false	0	9.006	1	1	2	1	1684	178.4	5.36	10.75	1	0.758	0.764	0.574	0.984	0.549	0.935	0.612	0.687	0.562	8.1	6.1	6.2	4.6	7.9	4.4	7.5	4.9	5.5	4.5	High	High	High	High	High	High	High	High	High	High	1
-1.52908e+18	FALSE	High	IsMasterProtein	TGGT1_315150-t26_1-p1	transcript=TGGT1_315150-t26_1 | gene=TGGT1_315150 | organism=Toxoplasma_gondii_GT1 | gene_product=Putative eukaryotic initiation factor-4E [Source:UniProtKB/TrEMBL;Acc:S7ULH3] | transcript_product=putative eukaryotic initiation factor-4E | location=TGGT1_chrXI:4467998-4473119(+) | protein_length=455 | sequence_SO=chromosome | SO=protein_coding_gene | is_pseudo=false	0	11.729	9	4	6	3	455	49.9	8.98	11.68	4	2.385	2.78	0.843	2.396	1.039	1.675	1.05	1.064	1.222	8.1	19.3	22.5	6.8	19.4	8.4	13.5	8.5	8.6	9.9	High	High	High	High	High	High	High	High	High	High	1
5.96248e+18	FALSE	High	IsMasterProtein	TGGT1_240250-t26_1-p1	transcript=TGGT1_240250-t26_1 | gene=TGGT1_240250 | organism=Toxoplasma_gondii_GT1 | gene_product=Macro domain-containing protein [Source:UniProtKB/TrEMBL;Acc:S7W065] | transcript_product=macro domain-containing protein | location=TGGT1_chrVI:1105085-1109716(+) | protein_length=817 | sequence_SO=chromosome | SO=protein_coding_gene | is_pseudo=false	0.01	2.404	2	1	1	1	817	87.9	7.62	0	1	1.03	1.511	0.884	0.572	0.28	0.354	0.563	0.441	0.676	8.7	8.9	13.1	7.7	5	2.4	3.1	4.9	3.8	5.9	High	High	High	High	High	High	High	High	High	High	1
-7.22368e+18	FALSE	High	IsMasterProtein	TGGT1_216740A-t26_1-p1	transcript=TGGT1_216740A-t26_1 | gene=TGGT1_216740A | organism=Toxoplasma_gondii_GT1 | gene_product=Flavokinase domain-containing protein [Source:UniProtKB/TrEMBL;Acc:S7W0Y7] | transcript_product=riboflavin kinase | location=TGGT1_chrXI:5846393-5850877(+) | protein_length=985 | sequence_SO=chromosome | SO=protein_coding_gene | is_pseudo=false	0	9.593	3	2	2	2	985	104.3	6.95	6.54	2	1.001	0.881	0.885	0.474	0.603	0.725	0.01	0.377	0.371	8.7	8.7	7.7	7.7	4.1	5.2	6.3		3.3	3.2	High	High	High	High	High	High	High	High	High	High	1
-4.20495e+18	FALSE	High	IsMasterProtein	TGGT1_214960-t26_1-p1	transcript=TGGT1_214960-t26_1 | gene=TGGT1_214960 | organism=Toxoplasma_gondii_GT1 | gene_product=AP2 domain transcription factor AP2X-8 [Source:UniProtKB/TrEMBL;Acc:S7URI0] | transcript_product=AP2 domain transcription factor AP2X-8 | location=TGGT1_chrX:6507474-6521102(+) | protein_length=3817 | sequence_SO=chromosome | SO=protein_coding_gene | is_pseudo=false	0	7.406	1	1	1	1	3817	399.4	6.67	4.26	1	1.087	1.124	1.116	0.948	0.973	0.725	0.703	0.51	0.657	9.5	10.3	10.6	10.6	9	9.2	6.9	6.7	4.8	6.2	High	High	High	High	High	High	High	High	High	High	1
4.59544e+18	FALSE	High	IsMasterProtein	TGGT1_262070-t26_1-p1	transcript=TGGT1_262070-t26_1 | gene=TGGT1_262070 | organism=Toxoplasma_gondii_GT1 | gene_product=KRR1 small subunit processome component [Source:UniProtKB/TrEMBL;Acc:A0A125YI23] | transcript_product=putative ribosomal rna assembly protein mis3 | location=TGGT1_chrVIIb:1365066-1371076(-) | protein_length=394 | sequence_SO=chromosome | SO=protein_coding_gene | is_pseudo=false	0	12.373	9	2	2	2	394	45.1	9.67	7.04	2	1.101	1.363	0.956	1.064	0.835	0.474	0.01	0.292	0.622	10	11	13.7	9.6	10.7	8.4	4.8		2.9	6.2	High	High	High	High	High	High	High	High	High	High	1
-4.84531e+18	FALSE	High	IsMasterProtein	TGGT1_268900-t26_1-p1	transcript=TGGT1_268900-t26_1 | gene=TGGT1_268900 | organism=Toxoplasma_gondii_GT1 | gene_product=RING-type domain-containing protein [Source:UniProtKB/TrEMBL;Acc:S7V5D0] | transcript_product=dense granular protein GRA10 | location=TGGT1_chrVIII:6214329-6218424(-) | protein_length=894 | sequence_SO=chromosome | SO=protein_coding_gene | is_pseudo=false	0.001	6.223	2	1	1	1	894	94.1	6.89	4.74	1	1.617	1.168	1.176	1.176	0.867	0.839	0.652	0.348	0.691	10	16.2	11.7	11.8	11.8	8.7	8.4	6.5	3.5	6.9	High	High	High	High	High	High	High	High	High	High	1
8.24688e+18	FALSE	High	IsMasterProtein	TGGT1_203120-t26_1-p1	transcript=TGGT1_203120-t26_1 | gene=TGGT1_203120 | organism=Toxoplasma_gondii_GT1 | gene_product=hypothetical protein | transcript_product=hypothetical protein | location=TGGT1_chrVIIa:2701221-2703410(+) | protein_length=516 | sequence_SO=chromosome | SO=protein_coding_gene | is_pseudo=false	0.005	2.982	3	1	1	1	516	56.2	5.31	1.79	1	1.041	1.21	0.774	0.65	1.084	0.411	0.576	0.704	0.607	10.4	10.8	12.6	8.1	6.8	11.3	4.3	6	7.3	6.3	High	High	High	High	High	High	High	High	High	High	1
8.68604e+18	FALSE	High	IsMasterProtein	TGGT1_259050-t26_1-p1	transcript=TGGT1_259050-t26_1 | gene=TGGT1_259050 | organism=Toxoplasma_gondii_GT1 | gene_product=hypothetical protein | transcript_product=hypothetical protein | location=TGGT1_chrVIIb:2949510-2951378(-) | protein_length=286 | sequence_SO=chromosome | SO=protein_coding_gene | is_pseudo=false	0	10.664	9	1	1	1	286	31.5	4.79	4.86	1	1.306	1.288	0.936	0.983	0.726	0.582	0.47	0.601	0.598	11.5	15	14.8	10.8	11.3	8.4	6.7	5.4	6.9	6.9	High	High	High	High	High	High	High	High	High	High	1
-5.47362e+18	FALSE	High	IsMasterProtein	TGGT1_269430-t26_1-p1	transcript=TGGT1_269430-t26_1 | gene=TGGT1_269430 | organism=Toxoplasma_gondii_GT1 | gene_product=Polyprenyl synthetase superfamily protein [Source:UniProtKB/TrEMBL;Acc:S7WDN0] | transcript_product=polyprenyl synthetase superfamily protein | location=TGGT1_chrVIII:5799514-5805657(+) | protein_length=676 | sequence_SO=chromosome | SO=protein_coding_gene | is_pseudo=false	0.003	3.448	2	1	1	1	676	72.5	8.5	3.22	1	1.069	1.525	1.342	1.198	0.789	0.378	0.406	0.783	0.927	11.5	12.3	17.6	15.4	13.8	9.1	4.4	4.7	9	10.7	High	High	High	High	High	High	High	High	High	High	1
-1.56769e+18	FALSE	High	IsMasterProtein	TGGT1_288600-t26_1-p1	transcript=TGGT1_288600-t26_1 | gene=TGGT1_288600 | organism=Toxoplasma_gondii_GT1 | gene_product=WD domain, G-beta repeat-containing protein [Source:UniProtKB/TrEMBL;Acc:S7VY82] | transcript_product=WD domain, G-beta repeat-containing protein | location=TGGT1_chrIX:2440558-2442903(-) | protein_length=656 | sequence_SO=chromosome | SO=protein_coding_gene | is_pseudo=false	0	14.047	5	2	2	2	656	71.7	5.63	8.71	2	1.163	1.775	1.313	1.68	0.91	1.301	0.86	0.846	0.753	11.6	13.5	20.6	15.3	19.5	10.6	15.1	10	9.8	8.8	High	High	High	High	High	High	High	High	High	High	1
7.06204e+18	FALSE	High	IsMasterProtein	TGGT1_310350-t26_1-p1	transcript=TGGT1_310350-t26_1 | gene=TGGT1_310350 | organism=Toxoplasma_gondii_GT1 | gene_product=GPI inositol-deacylase [Source:UniProtKB/TrEMBL;Acc:S7W1B8] | transcript_product=PGAP1 family protein | location=TGGT1_chrXI:1239988-1251620(-) | protein_length=2852 | sequence_SO=chromosome | SO=protein_coding_gene | is_pseudo=false	0.001	5.088	1	2	2	2	2852	309	6.51	6.33	2	0.907	1.3	0.995	0.956	0.596	0.441	0.578	0.538	0.53	12	10.9	15.6	12	11.5	7.2	5.3	7	6.5	6.4	High	High	High	High	High	High	High	High	High	High	1
4.6132e+18	FALSE	High	IsMasterProtein	TGGT1_313930-t26_1-p1	transcript=TGGT1_313930-t26_1 | gene=TGGT1_313930 | organism=Toxoplasma_gondii_GT1 | gene_product=CRT-like domain-containing protein [Source:UniProtKB/TrEMBL;Acc:S7W2G3] | transcript_product=transmembrane protein | location=TGGT1_chrXI:3773998-3786202(+) | protein_length=881 | sequence_SO=chromosome | SO=protein_coding_gene | is_pseudo=false	0	8.569	3	1	1	1	881	94.8	7.55	5.06	1	1.194	1.275	1.075	0.917	0.633	0.646	0.639	0.642	0.53	12	14.4	15.3	12.9	11	7.6	7.8	7.7	7.7	6.4	High	High	High	High	High	High	High	High	High	High	1
-1.46251e+18	FALSE	High	IsMasterProtein	TGGT1_227390-t26_1-p1	transcript=TGGT1_227390-t26_1 | gene=TGGT1_227390 | organism=Toxoplasma_gondii_GT1 | gene_product=SET domain-containing protein [Source:UniProtKB/TrEMBL;Acc:S7UX38] | transcript_product=hypothetical protein | location=TGGT1_chrX:876324-880460(-) | protein_length=1066 | sequence_SO=chromosome | SO=protein_coding_gene | is_pseudo=false	0	11.336	4	2	2	2	1066	116.1	5.25	7.61	2	1.572	1.295	0.575	0.81	0.817	0.269	0.313	0.436	0.422	12.1	19.1	15.7	7	9.8	9.9	3.3	3.8	5.3	5.1	High	High	High	High	High	High	High	High	High	High	1
1.40266e+18	FALSE	High	IsMasterProtein	TGGT1_259860-t26_1-p1	transcript=TGGT1_259860-t26_1 | gene=TGGT1_259860 | organism=Toxoplasma_gondii_GT1 | gene_product=SANT domain-containing protein [Source:UniProtKB/TrEMBL;Acc:S7WEG8] | transcript_product=hypothetical protein | location=TGGT1_chrVIIb:2626172-2635179(-) | protein_length=2125 | sequence_SO=chromosome | SO=protein_coding_gene | is_pseudo=false	0	8.334	1	1	1	1	2125	229.7	5.39	3.9	1	1.062	1.456	1.193	1.706	1.281	0.843	0.804	0.843	0.721	12.1	12.9	17.7	14.5	20.7	15.6	10.2	9.8	10.2	8.8	High	High	High	High	High	High	High	High	High	High	1
6.24002e+18	FALSE	High	IsMasterProtein	TGGT1_221330-t26_1-p1	transcript=TGGT1_221330-t26_1 | gene=TGGT1_221330 | organism=Toxoplasma_gondii_GT1 | gene_product=TOP4c domain-containing protein [Source:UniProtKB/TrEMBL;Acc:S7ULD4] | transcript_product=DNA gyrase/topoisomerase IV, A subunit domain-containing protein | location=TGGT1_chrII:238032-251489(-) | protein_length=1594 | sequence_SO=chromosome | SO=protein_coding_gene | is_pseudo=false	0	8.289	1	1	1	1	1594	175.7	7.17	4	1	1.712	1.656	1.043	1.022	0.958	0.728	0.571	0.65	0.671	12.6	21.5	20.8	13.1	12.8	12	9.1	7.2	8.2	8.4	High	High	High	High	High	High	High	High	High	High	1
-3.76375e+18	FALSE	High	IsMasterProtein	TGGT1_278040-t26_1-p1	transcript=TGGT1_278040-t26_1 | gene=TGGT1_278040 | organism=Toxoplasma_gondii_GT1 | gene_product=G-patch domain-containing protein [Source:UniProtKB/TrEMBL;Acc:S7WFX4] | transcript_product=G-patch domain-containing protein | location=TGGT1_chrXII:6251184-6253521(+) | protein_length=318 | sequence_SO=chromosome | SO=protein_coding_gene | is_pseudo=false	0.001	5.442	6	1	2	1	318	35.3	8.59	5.51	1	1.517	1.698	1.091	1.716	1.119	1.304	1.442	1.561	1.479	12.7	19.2	21.5	13.8	21.7	14.2	16.5	18.3	19.8	18.7	High	High	High	High	High	High	High	High	High	High	1
-8.37092e+18	FALSE	Medium	IsMasterProtein	TGGT1_202420-t26_1-p1	transcript=TGGT1_202420-t26_1 | gene=TGGT1_202420 | organism=Toxoplasma_gondii_GT1 | gene_product=hypothetical protein | transcript_product=hypothetical protein | location=TGGT1_chrVIIa:3236336-3238000(+) | protein_length=272 | sequence_SO=chromosome | SO=protein_coding_gene | is_pseudo=false	0.018	1.933	4	1	1	1	272	29.7	6.14	2.62	1	1.588	1.788	1.355	1.463	1.153	0.906	0.808	0.969	0.851	12.8	20.3	22.8	17.3	18.7	14.7	11.6	10.3	12.4	10.9	High	High	High	High	High	High	High	High	High	High	1
-1.44146e+18	FALSE	High	IsMasterProtein	TGGT1_255220-t26_1-p1	transcript=TGGT1_255220-t26_1 | gene=TGGT1_255220 | organism=Toxoplasma_gondii_GT1 | gene_product=AP2 domain transcription factor AP2VIIb-3 [Source:UniProtKB/TrEMBL;Acc:S7WAT4] | transcript_product=AP2 domain transcription factor AP2VIIb-3 | location=TGGT1_chrVIIb:4894610-4902012(-) | protein_length=2287 | sequence_SO=chromosome | SO=protein_coding_gene | is_pseudo=false	0	15.774	2	2	2	2	2287	237.4	5.31	9.28	2	0.822	1.601	1.07	0.576	0.919	0.643	0.746	0.62	0.489	12.9	10.6	20.6	13.8	7.4	11.8	8.3	9.6	8	6.3	High	High	High	High	High	High	High	High	High	High	1
6.1039e+18	FALSE	High	IsMasterProtein	TGGT1_237290-t26_1-p1	transcript=TGGT1_237290-t26_1 | gene=TGGT1_237290 | organism=Toxoplasma_gondii_GT1 | gene_product=hypothetical protein | transcript_product=hypothetical protein | location=TGGT1_chrX:5723084-5730391(-) | protein_length=2085 | sequence_SO=chromosome | SO=protein_coding_gene | is_pseudo=false	0.003	3.522	1	2	3	2	2085	222.3	7.17	6.25	2	1.419	1.781	1.4	1.838	1.25	0.977	0.92	0.571	0.685	13	18.4	23.1	18.2	23.9	16.2	12.7	11.9	7.4	8.9	High	High	High	High	High	High	High	High	High	High	1
4.26209e+18	FALSE	High	IsMasterProtein	TGGT1_214980-t26_1-p1	transcript=TGGT1_214980-t26_1 | gene=TGGT1_214980 | organism=Toxoplasma_gondii_GT1 | gene_product=hypothetical protein | transcript_product=hypothetical protein | location=TGGT1_chrX:6539930-6543566(-) | protein_length=1109 | sequence_SO=chromosome | SO=protein_coding_gene | is_pseudo=false	0.001	5.032	1	1	1	1	1109	117.1	9.63	2.78	1	1.419	1.344	1.291	1.305	1.214	0.79	0.62	0.823	0.833	13.4	19	18	17.3	17.5	16.3	10.6	8.3	11	11.2	High	High	High	High	High	High	High	High	High	High	1
1.78269e+18	FALSE	High	IsMasterProtein	TGGT1_309020-t26_1-p1	transcript=TGGT1_309020-t26_1 | gene=TGGT1_309020 | organism=Toxoplasma_gondii_GT1 | gene_product=PP-loop family protein [Source:UniProtKB/TrEMBL;Acc:S7US27] | transcript_product=PP-loop family protein | location=TGGT1_chrXI:400969-402945(+) | protein_length=658 | sequence_SO=chromosome | SO=protein_coding_gene | is_pseudo=false	0.007	2.656	1	1	1	1	658	69.5	8.6	2.38	1	1.201	1.422	0.837	0.842	0.566	0.491	0.416	0.431	0.618	13.4	16.1	19.1	11.2	11.3	7.6	6.6	5.6	5.8	8.3	High	High	High	High	High	High	High	High	High	High	1
-5.4319e+18	FALSE	High	IsMasterProtein	TGGT1_277850-t26_1-p1	transcript=TGGT1_277850-t26_1 | gene=TGGT1_277850 | organism=Toxoplasma_gondii_GT1 | gene_product=PDZ domain-containing protein [Source:UniProtKB/TrEMBL;Acc:S7W8J4] | transcript_product=trypsin domain-containing protein | location=TGGT1_chrXII:6389375-6396376(+) | protein_length=741 | sequence_SO=chromosome | SO=protein_coding_gene | is_pseudo=false	0	11.384	4	2	2	2	741	81	9.61	6.57	2	1.824	2.509	0.808	2.254	0.656	0.98	0.811	0.405	0.461	13.7	25.1	34.5	11.1	31	9	13.5	11.1	5.6	6.3	High	High	High	High	High	High	High	High	High	High	1
-6.54933e+18	FALSE	High	IsMasterProtein	TGGT1_318390-t26_1-p1	transcript=TGGT1_318390-t26_1 | gene=TGGT1_318390 | organism=Toxoplasma_gondii_GT1 | gene_product=hypothetical protein | transcript_product=hypothetical protein | location=TGGT1_chrIV:1317932-1322384(+) | protein_length=1278 | sequence_SO=chromosome | SO=protein_coding_gene | is_pseudo=false	0.001	6.792	1	1	2	1	1278	137.9	5.9	6.97	1	1.578	1.555	1.065	1.684	0.756	0.792	0.767	0.699	0.533	14	22	21.7	14.9	23.5	10.5	11.1	10.7	9.8	7.4	High	High	High	High	High	High	High	High	High	High	1
-4.89846e+18	FALSE	High	IsMasterProtein	TGGT1_210820-t26_1-p1	transcript=TGGT1_210820-t26_1 | gene=TGGT1_210820 | organism=Toxoplasma_gondii_GT1 | gene_product=hypothetical protein | transcript_product=hypothetical protein | location=TGGT1_chrIV:1959315-1963312(-) | protein_length=1062 | sequence_SO=chromosome | SO=protein_coding_gene | is_pseudo=false	0.007	2.756	1	1	1	1	1062	112.9	6.68	2.39	1	1.246	1.475	0.768	0.88	0.72	0.599	0.383	0.4	0.361	14.3	17.8	21	10.9	12.5	10.3	8.5	5.5	5.7	5.1	High	High	High	High	High	High	High	High	High	High	1
-5.65127e+18	FALSE	High	IsMasterProtein	TGGT1_236950-t26_1-p1	transcript=TGGT1_236950-t26_1 | gene=TGGT1_236950 | organism=Toxoplasma_gondii_GT1 | gene_product=hypothetical protein | transcript_product=hypothetical protein | location=TGGT1_chrX:5495249-5496238(-) | protein_length=112 | sequence_SO=chromosome | SO=protein_coding_gene | is_pseudo=false	0	23.889	35	1	2	1	112	12.5	6.49	12.92	1	0.584	0.965	0.778	0.9	0.907	0.643	0.559	0.668	0.604	14.5	8.4	14	11.2	13	13.1	9.3	8.1	9.6	8.7	High	High	High	High	High	High	High	High	High	High	1
-3.73917e+17	FALSE	High	IsMasterProtein	TGGT1_272720-t26_1-p1	transcript=TGGT1_272720-t26_1 | gene=TGGT1_272720 | organism=Toxoplasma_gondii_GT1 | gene_product=mRNA cap 0 methyltransferase domain-containing protein [Source:UniProtKB/TrEMBL;Acc:S7V416] | transcript_product=methyltransferase domain-containing protein | location=TGGT1_chrVIII:3765617-3770718(+) | protein_length=1286 | sequence_SO=chromosome | SO=protein_coding_gene | is_pseudo=false	0.007	2.607	1	1	1	1	1286	138.4	6.4	2.72	1	1.212	1.118	0.8	1.196	0.806	0.335	0.351	0.512	0.342	14.5	17.5	16.2	11.6	17.3	11.7	4.8	5.1	7.4	4.9	High	High	High	High	High	High	High	High	High	High	1
-8.21492e+18	FALSE	High	IsMasterProtein	TGGT1_267440-t26_1-p1	transcript=TGGT1_267440-t26_1 | gene=TGGT1_267440 | organism=Toxoplasma_gondii_GT1 | gene_product=RING-type domain-containing protein [Source:UniProtKB/TrEMBL;Acc:A0A125YZS6] | transcript_product=RING zinc finger protein | location=TGGT1_chrIX:483796-487877(-) | protein_length=384 | sequence_SO=chromosome | SO=protein_coding_gene | is_pseudo=false	0.001	5.672	4	1	1	1	384	41.5	6.24	3.11	1	1.007	1.003	0.552	0.529	0.478	0.346	0.315	0.241	0.194	15.1	15.2	15.1	8.3	8	7.2	5.2	4.7	3.6	2.9	High	High	High	High	High	High	High	High	High	High	1
8.31622e+18	FALSE	Medium	IsMasterProtein	TGGT1_266030-t26_1-p1	transcript=TGGT1_266030-t26_1 | gene=TGGT1_266030 | organism=Toxoplasma_gondii_GT1 | gene_product=Pre-mRNA-splicing factor 38 [Source:UniProtKB/TrEMBL;Acc:S7UGR0] | transcript_product=putative pre-mRNA splicing factor | location=TGGT1_chrIX:1169984-1171558(-) | protein_length=524 | sequence_SO=chromosome | SO=protein_coding_gene | is_pseudo=false	0.022	1.774	1	1	1	1	524	63	8.88	1.9	1	1.066	1.756	0.596	1.062	0.466	0.737	0.52	0.695	0.586	15.4	16.4	27.1	9.2	16.4	7.2	11.4	8	10.7	9	High	High	High	High	High	High	High	High	High	High	1
-3.93497e+18	FALSE	High	IsMasterProtein	TGGT1_314690-t26_1-p1	transcript=TGGT1_314690-t26_1 | gene=TGGT1_314690 | organism=Toxoplasma_gondii_GT1 | gene_product=hypothetical protein | transcript_product=hypothetical protein | location=TGGT1_chrXI:4168871-4173014(-) | protein_length=468 | sequence_SO=chromosome | SO=protein_coding_gene | is_pseudo=false	0	14.499	5	1	1	1	468	52.2	7.65	7.98	1	1.404	1.111	1.02	0.805	0.679	0.6	0.637	0.674	0.571	15.5	21.8	17.2	15.8	12.5	10.5	9.3	9.9	10.5	8.9	High	High	High	High	High	High	High	High	High	High	1
7.18628e+18	FALSE	High	IsMasterProtein	TGGT1_309960A-t26_1-p1	transcript=TGGT1_309960A-t26_1 | gene=TGGT1_309960A | organism=Toxoplasma_gondii_GT1 | gene_product=hypothetical protein | transcript_product=hypothetical protein | location=TGGT1_chrXI:899459-901392(+) | protein_length=644 | sequence_SO=chromosome | SO=protein_coding_gene | is_pseudo=false	0.001	5.654	3	1	1	1	644	69.9	9.83	3.39	1	0.932	0.637	1.025	0.451	0.68	0.313	0.449	0.475	0.245	15.6	14.5	9.9	16	7	10.6	4.9	7	7.4	3.8	High	High	High	High	High	High	High	High	High	High	1
5.57898e+18	FALSE	Medium	IsMasterProtein	TGGT1_227980-t26_1-p1	transcript=TGGT1_227980-t26_1 | gene=TGGT1_227980 | organism=Toxoplasma_gondii_GT1 | gene_product=hypothetical protein | transcript_product=hypothetical protein | location=TGGT1_chrX:604563-607952(+) | protein_length=802 | sequence_SO=chromosome | SO=protein_coding_gene | is_pseudo=false	0.01	2.376	2	1	1	1	802	82	7.75	2.66	1	1.118	1.118	1.128	1.049	0.722	0.534	0.39	0.372	0.411	15.6	17.5	17.5	17.6	16.4	11.3	8.3	6.1	5.8	6.4	High	High	High	High	High	High	High	High	High	High	1
-6.73986e+18	FALSE	High	IsMasterProtein	TGGT1_316530-t26_1-p1	transcript=TGGT1_316530-t26_1 | gene=TGGT1_316530 | organism=Toxoplasma_gondii_GT1 | gene_product=Putative myosin heavy chain [Source:UniProtKB/TrEMBL;Acc:S7UL82] | transcript_product=putative myosin heavy chain | location=TGGT1_chrXI:5324284-5333125(+) | protein_length=830 | sequence_SO=chromosome | SO=protein_coding_gene | is_pseudo=false	0.003	3.343	1	1	1	1	830	93.1	6.44	2.03	1	0.902	1.125	0.602	0.869	0.391	0.496	0.28	0.359	0.381	15.6	14.1	17.6	9.4	13.6	6.1	7.7	4.4	5.6	6	High	High	High	High	High	High	High	High	High	High	1
-7.84285e+18	FALSE	High	IsMasterProtein	TGGT1_245560-t26_1-p1	transcript=TGGT1_245560-t26_1 | gene=TGGT1_245560 | organism=Toxoplasma_gondii_GT1 | gene_product=hypothetical protein | transcript_product=hypothetical protein | location=TGGT1_chrXII:2306830-2317367(+) | protein_length=1998 | sequence_SO=chromosome | SO=protein_coding_gene | is_pseudo=false	0	7.167	1	1	2	1	1998	207.5	8.07	7.97	1	1.397	1.203	1.297	0.838	1.324	1.031	0.843	0.95	0.934	15.7	21.9	18.9	20.3	13.1	20.7	16.2	13.2	14.9	14.6	High	High	High	High	High	High	High	High	High	High	1
-6.60496e+18	FALSE	Medium	IsMasterProtein	TGGT1_411660-t26_1-p1	transcript=TGGT1_411660-t26_1 | gene=TGGT1_411660 | organism=Toxoplasma_gondii_GT1 | gene_product=hypothetical protein | transcript_product=hypothetical protein | location=AAQM03000526:77-1082(-) | protein_length=129 | sequence_SO=contig | SO=protein_coding_gene | is_pseudo=false	0.021	1.832	5	1	2	1	129	14	7.56	0	1	1.375	1.06	0.837	1.392	0.885	1.01	0.672	0.69	0.778	15.7	21.6	16.6	13.1	21.8	13.9	15.8	10.5	10.8	12.2	High	High	High	High	High	High	High	High	High	High	1
-4.78424e+18	FALSE	High	IsMasterProtein	TGGT1_320592-t26_1-p1	transcript=TGGT1_320592-t26_1 | gene=TGGT1_320592 | organism=Toxoplasma_gondii_GT1 | gene_product=hypothetical protein | transcript_product=hypothetical protein | location=TGGT1_chrIV:159159-176441(+) | protein_length=2072 | sequence_SO=chromosome | SO=protein_coding_gene | is_pseudo=false	0.008	2.57	1	1	1	1	2072	222.5	8.02	2.48	1	1.313	1.537	0.887	0.997	0.989	0.874	0.602	0.528	0.462	15.7	20.7	24.2	14	15.7	15.6	13.7	9.5	8.3	7.3	High	High	High	High	High	High	High	High	High	High	1
5.91863e+18	FALSE	High	IsMasterProtein	TGGT1_251610-t26_1-p1	transcript=TGGT1_251610-t26_1 | gene=TGGT1_251610 | organism=Toxoplasma_gondii_GT1 | gene_product=hypothetical protein | transcript_product=hypothetical protein | location=TGGT1_chrXII:5408666-5416556(+) | protein_length=1421 | sequence_SO=chromosome | SO=protein_coding_gene | is_pseudo=false	0.001	4.766	1	1	1	1	1421	152.2	6.38	3.9	1	1.7	1.813	1.148	1.826	0.96	0.746	0.693	0.608	0.702	15.9	27.1	28.9	18.3	29.1	15.3	11.9	11	9.7	11.2	High	High	High	High	High	High	High	High	High	High	1
-1.31556e+18	FALSE	High	IsMasterProtein	TGGT1_259720-t26_1-p1	transcript=TGGT1_259720-t26_1 | gene=TGGT1_259720 | organism=Toxoplasma_gondii_GT1 | gene_product=hypothetical protein | transcript_product=hypothetical protein | location=TGGT1_chrVIIb:2665015-2671224(+) | protein_length=976 | sequence_SO=chromosome | SO=protein_coding_gene | is_pseudo=false	0.002	4.222	1	1	1	1	976	105.8	5.55	2.7	1	1.088	0.865	0.79	0.868	0.589	0.553	0.669	0.195	0.513	16.1	17.6	14	12.7	14	9.5	8.9	10.8	3.1	8.3	High	High	High	High	High	High	High	High	High	High	1
8.87167e+18	FALSE	High	IsMasterProtein	TGGT1_281675-t26_1-p1	transcript=TGGT1_281675-t26_1 | gene=TGGT1_281675 | organism=Toxoplasma_gondii_GT1 | gene_product=Protein kinase domain-containing protein [Source:UniProtKB/TrEMBL;Acc:S7UW93] | transcript_product=putative protein kinase | location=TGGT1_chrVIIa:4156147-4159857(+) | protein_length=1236 | sequence_SO=chromosome | SO=protein_coding_gene | is_pseudo=false	0.006	2.817	1	1	1	1	1236	133.9	8.91	2.26	1	1.569	1.394	0.972	1.359	1.056	0.835	0.986	0.973	0.956	16.2	25.3	22.5	15.7	22	17.1	13.5	15.9	15.7	15.4	High	High	High	High	High	High	High	High	High	High	1
1.0105e+18	FALSE	High	IsMasterProtein	TGGT1_310770-t26_1-p1	transcript=TGGT1_310770-t26_1 | gene=TGGT1_310770 | organism=Toxoplasma_gondii_GT1 | gene_product=hypothetical protein | transcript_product=hypothetical protein | location=TGGT1_chrXI:1547362-1550728(-) | protein_length=342 | sequence_SO=chromosome | SO=protein_coding_gene | is_pseudo=false	0.001	6.764	5	1	1	1	342	38.8	9.38	4.3	1	1.525	1.587	1.062	1.321	1.228	0.948	0.724	0.791	0.572	16.3	24.8	25.8	17.3	21.5	20	15.4	11.8	12.9	9.3	High	High	High	High	High	High	High	High	High	High	1
7.1869e+18	FALSE	High	IsMasterProtein	TGGT1_220230B-t26_1-p1	transcript=TGGT1_220230B-t26_1 | gene=TGGT1_220230B | organism=Toxoplasma_gondii_GT1 | gene_product=Leucine rich repeat-containing protein [Source:UniProtKB/TrEMBL;Acc:S7UFW7] | transcript_product=leucine rich repeat-containing protein | location=TGGT1_chrV:125444-126743(-) | protein_length=324 | sequence_SO=chromosome | SO=protein_coding_gene | is_pseudo=false	0.001	6.8	10	1	1	1	324	34.5	4.78	5.77	1	1.3	1.25	1.085	1.324	0.974	0.999	1.039	0.695	0.905	16.3	21.1	20.3	17.6	21.5	15.8	16.2	16.9	11.3	14.7	High	High	High	High	High	High	High	High	High	High	1	Phospho [S275]
8.51714e+18	FALSE	Medium	IsMasterProtein	TGGT1_234220-t26_1-p1	transcript=TGGT1_234220-t26_1 | gene=TGGT1_234220 | organism=Toxoplasma_gondii_GT1 | gene_product=hypothetical protein | transcript_product=hypothetical protein | location=TGGT1_chrX:4095111-4102760(+) | protein_length=1072 | sequence_SO=chromosome | SO=protein_coding_gene | is_pseudo=false	0.012	2.23	1	1	2	1	1072	116	6.43	0	1	1.237	1.071	0.66	0.66	0.395	0.255	0.292	0.275	0.29	16.8	20.8	18	11.1	11.1	6.6	4.3	4.9	4.6	4.9	High	High	High	High	High	High	High	High	High	High	1
8.80076e+18	FALSE	High	IsMasterProtein	TGGT1_299100-t26_1-p1	transcript=TGGT1_299100-t26_1 | gene=TGGT1_299100 | organism=Toxoplasma_gondii_GT1 | gene_product=hypothetical protein | transcript_product=hypothetical protein | location=TGGT1_chrIII:2162728-2169237(-) | protein_length=2169 | sequence_SO=chromosome | SO=protein_coding_gene | is_pseudo=false	0.001	5.523	1	2	2	2	2169	231.7	5.53	5.11	2	1.131	1.243	0.917	1.004	0.851	0.902	0.713	0.956	0.691	16.8	19	20.9	15.4	16.9	14.3	15.1	12	16.1	11.6	High	High	High	High	High	High	High	High	High	High	1
-6.68085e+18	FALSE	Medium	IsMasterProtein	TGGT1_236260-t26_1-p1	transcript=TGGT1_236260-t26_1 | gene=TGGT1_236260 | organism=Toxoplasma_gondii_GT1 | gene_product=PPM-type phosphatase domain-containing protein [Source:UniProtKB/TrEMBL;Acc:S7URR0] | transcript_product=protein phosphatase 2C domain-containing protein | location=TGGT1_chrX:5251094-5255991(+) | protein_length=882 | sequence_SO=chromosome | SO=protein_coding_gene | is_pseudo=false	0.042	1.386	1	1	1	1	882	101.4	8.37	2.21	1	0.998	1.406	0.81	1.072	0.807	0.838	0.522	0.364	0.5	17.2	17.2	24.2	13.9	18.5	13.9	14.4	9	6.3	8.6	High	High	High	High	High	High	High	High	High	High	1
5.23114e+17	FALSE	High	IsMasterProtein	TGGT1_270690-t26_1-p1	transcript=TGGT1_270690-t26_1 | gene=TGGT1_270690 | organism=Toxoplasma_gondii_GT1 | gene_product=Arginyl-tRNA synthetase [Source:UniProtKB/TrEMBL;Acc:A0A125YS10] | transcript_product=arginyl-tRNA synthetase | location=TGGT1_chrVIII:5067864-5080628(-) | protein_length=1174 | sequence_SO=chromosome | SO=protein_coding_gene | is_pseudo=false	0	12.784	2	1	1	1	1174	130.2	6.58	8.35	1	1.313	1.356	1.027	0.937	0.771	0.75	0.511	0.551	0.327	17.4	22.9	23.6	17.9	16.3	13.4	13.1	8.9	9.6	5.7	High	High	High	High	High	High	High	High	High	High	1
6.02992e+18	FALSE	High	IsMasterProtein	TGGT1_298980-t26_1-p1	transcript=TGGT1_298980-t26_1 | gene=TGGT1_298980 | organism=Toxoplasma_gondii_GT1 | gene_product=RNA pseudouridine synthase superfamily protein [Source:UniProtKB/TrEMBL;Acc:S7VV76] | transcript_product=RNA pseudouridine synthase superfamily protein | location=TGGT1_chrIII:2264306-2270133(-) | protein_length=884 | sequence_SO=chromosome | SO=protein_coding_gene | is_pseudo=false	0.001	4.859	1	1	1	1	884	97.4	7.05	2.49	1	1.061	1.37	0.721	1.098	0.724	0.509	0.397	0.469	0.331	17.4	18.5	23.9	12.6	19.1	12.6	8.9	6.9	8.2	5.8	High	High	High	High	High	High	High	High	High	High	1
7.92805e+16	FALSE	Low	IsMasterProtein	TGGT1_268000-t26_1-p1	transcript=TGGT1_268000-t26_1 | gene=TGGT1_268000 | organism=Toxoplasma_gondii_GT1 | gene_product=hypothetical protein | transcript_product=hypothetical protein | location=TGGT1_chrVIII:6721802-6732429(-) | protein_length=1190 | sequence_SO=chromosome | SO=protein_coding_gene | is_pseudo=false	0.058	1.218	2	1	1	1	1190	132.8	5.3	0	1	1.08	1.32	0.775	0.777	0.886	0.396	0.278	0.295	0.18	17.4	18.8	23	13.5	13.5	15.4	6.9	4.8	5.1	3.1	High	High	High	High	High	High	High	High	High	High	1
7.93635e+18	FALSE	Low	IsMasterProtein	TGGT1_254250-t26_1-p1	transcript=TGGT1_254250-t26_1 | gene=TGGT1_254250 | organism=Toxoplasma_gondii_GT1 | gene_product=PRELI/MSF1 domain-containing protein [Source:UniProtKB/TrEMBL;Acc:S7W1Y0] | transcript_product=PRELI family protein | location=TGGT1_chrIII:1539597-1543028(-) | protein_length=485 | sequence_SO=chromosome | SO=protein_coding_gene | is_pseudo=false	0.053	1.273	2	1	1	1	485	53.6	8.5	1.8	1	0.951	1.324	0.852	0.901	0.937	0.517	0.449	0.424	0.394	17.5	16.7	23.2	14.9	15.8	16.4	9.1	7.9	7.4	6.9	High	High	High	High	High	High	High	High	High	High	1
-4.81228e+18	FALSE	High	IsMasterProtein	TGGT1_295105-t26_1-p1	transcript=TGGT1_295105-t26_1 | gene=TGGT1_295105 | organism=Toxoplasma_gondii_GT1 | gene_product=Putative rhoptry protein [Source:UniProtKB/TrEMBL;Acc:A0A125YNF1] | transcript_product=putative rhoptry protein | location=TGGT1_chrIa:1392959-1393267(-) | protein_length=102 | sequence_SO=chromosome | SO=protein_coding_gene | is_pseudo=false	0	11.624	31	2	4	1	102	10.7	4.61	15.84	2	0.945	1.108	1.054	1.574	0.691	0.785	0.646	0.548	0.545	17.6	16.6	19.5	18.5	27.7	12.2	13.8	11.4	9.6	9.6	High	High	High	High	High	High	High	High	High	High	1
-5.33585e+18	FALSE	High	IsMasterProtein	TGGT1_219640-t26_1-p1	transcript=TGGT1_219640-t26_1 | gene=TGGT1_219640 | organism=Toxoplasma_gondii_GT1 | gene_product=RING-type domain-containing protein [Source:UniProtKB/TrEMBL;Acc:S7V1Q2] | transcript_product=hypothetical protein | location=TGGT1_chrXII:726877-737690(+) | protein_length=1815 | sequence_SO=chromosome | SO=protein_coding_gene | is_pseudo=false	0	7.573	1	1	1	1	1815	197.2	8.57	5.07	1	1.238	1.481	1.124	1.161	1.03	0.836	0.831	0.761	0.791	18	22.2	26.6	20.2	20.8	18.5	15	14.9	13.7	14.2	High	High	High	High	High	High	High	High	High	High	1
4.246e+18	FALSE	High	IsMasterProtein	TGGT1_261960-t26_1-p1	transcript=TGGT1_261960-t26_1 | gene=TGGT1_261960 | organism=Toxoplasma_gondii_GT1 | gene_product=C2H2-type domain-containing protein [Source:UniProtKB/TrEMBL;Acc:S7UY82] | transcript_product=hypothetical protein | location=TGGT1_chrVIIb:1433296-1436946(+) | protein_length=1216 | sequence_SO=chromosome | SO=protein_coding_gene | is_pseudo=false	0.001	5.073	2	2	2	2	1216	130.1	6.4	5.99	2	1.488	1.77	1.327	1.202	0.848	0.873	0.906	0.685	1.001	18.1	26.9	32	24	21.7	15.3	15.8	16.4	12.4	18.1	High	High	High	High	High	High	High	High	High	High	1
-9.18493e+18	FALSE	Low	IsMasterProtein	TGGT1_253560-t26_1-p1	transcript=TGGT1_253560-t26_1 | gene=TGGT1_253560 | organism=Toxoplasma_gondii_GT1 | gene_product=hypothetical protein | transcript_product=hypothetical protein | location=TGGT1_chrIII:1008714-1014747(-) | protein_length=1904 | sequence_SO=chromosome | SO=protein_coding_gene | is_pseudo=false	0.062	1.177	0	1	1	1	1904	203.8	9.72	0	1	1.193	1.263	0.815	1.172	0.614	0.875	0.786	0.773	0.661	18.1	21.6	22.8	14.7	21.2	11.1	15.8	14.2	14	11.9	High	High	High	High	High	High	High	High	High	High	1
-2.7887e+18	FALSE	Medium	IsMasterProtein	TGGT1_294960-t26_1-p1	transcript=TGGT1_294960-t26_1 | gene=TGGT1_294960 | organism=Toxoplasma_gondii_GT1 | gene_product=hypothetical protein | transcript_product=hypothetical protein | location=TGGT1_chrIa:1275002-1279921(+) | protein_length=519 | sequence_SO=chromosome | SO=protein_coding_gene | is_pseudo=false	0.013	2.163	3	1	1	1	519	55.9	6.18	2.27	1	1.256	1.49	0.971	0.809	0.659	0.358	0.224	0.387	0.334	18.2	22.8	27.1	17.6	14.7	12	6.5	4.1	7	6.1	High	High	High	High	High	High	High	High	High	High	1
-7.63317e+16	FALSE	High	IsMasterProtein	TGGT1_215440-t26_1-p1	transcript=TGGT1_215440-t26_1 | gene=TGGT1_215440 | organism=Toxoplasma_gondii_GT1 | gene_product=WWE domain-containing protein [Source:UniProtKB/TrEMBL;Acc:A0A125YWF9] | transcript_product=WWE domain-containing protein | location=TGGT1_chrX:6850332-6855642(-) | protein_length=756 | sequence_SO=chromosome | SO=protein_coding_gene | is_pseudo=false	0.001	6.376	2	1	1	1	756	81.4	7.74	3.31	1	1.088	1.392	1.055	0.948	0.767	0.786	0.589	0.552	0.505	18.2	19.8	25.3	19.2	17.2	13.9	14.3	10.7	10	9.2	High	High	High	High	High	High	High	High	High	High	1
-1.12157e+18	FALSE	High	IsMasterProtein	TGGT1_263330-t26_1-p1	transcript=TGGT1_263330-t26_1 | gene=TGGT1_263330 | organism=Toxoplasma_gondii_GT1 | gene_product=DUF1681 domain-containing protein [Source:UniProtKB/TrEMBL;Acc:S7UXC0] | transcript_product=Adaptin ear-binding coat-associated protein 2 (NECAP-2) isoform 2 family protein | location=TGGT1_chrVIIb:597171-603066(-) | protein_length=294 | sequence_SO=chromosome | SO=protein_coding_gene | is_pseudo=fal…	0.006	2.866	4	1	1	1	294	33	5.4	2.57	1	1.435	1.478	0.874	1.062	0.646	0.751	0.729	0.822	0.712	18.5	26.5	27.3	16.2	19.6	11.9	13.9	13.5	15.2	13.2	High	High	High	High	High	High	High	High	High	High	1
-5.29992e+18	FALSE	High	IsMasterProtein	TGGT1_260800-t26_1-p1	transcript=TGGT1_260800-t26_1 | gene=TGGT1_260800 | organism=Toxoplasma_gondii_GT1 | gene_product=hypothetical protein | transcript_product=hypothetical protein | location=TGGT1_chrVIIb:2015456-2021790(+) | protein_length=1447 | sequence_SO=chromosome | SO=protein_coding_gene | is_pseudo=false	0	7.109	1	1	1	1	1447	160.4	5.62	4.6	1	1.344	1.355	0.919	1.155	0.82	0.609	0.782	0.682	0.594	18.6	25	25.2	17.1	21.5	15.2	11.3	14.5	12.7	11	High	High	High	High	High	High	High	High	High	High	1
2.67166e+18	FALSE	High	IsMasterProtein	TGGT1_210380-t26_1-p1	transcript=TGGT1_210380-t26_1 | gene=TGGT1_210380 | organism=Toxoplasma_gondii_GT1 | gene_product=hypothetical protein | transcript_product=hypothetical protein | location=TGGT1_chrIX:4625209-4631947(-) | protein_length=657 | sequence_SO=chromosome | SO=protein_coding_gene | is_pseudo=false	0.009	2.522	2	1	1	1	657	70.8	7.14	2.09	1	1.536	1.68	0.848	1.404	1.015	0.656	0.398	0.573	0.658	18.8	28.9	31.6	15.9	26.4	19.1	12.3	7.5	10.8	12.4	High	High	High	High	High	High	High	High	High	High	1
-8.49739e+18	FALSE	High	IsMasterProtein	TGGT1_315940-t26_1-p1	transcript=TGGT1_315940-t26_1 | gene=TGGT1_315940 | organism=Toxoplasma_gondii_GT1 | gene_product=Putative rhoptry protein [Source:UniProtKB/TrEMBL;Acc:S7UM44] | transcript_product=putative rhoptry protein | location=TGGT1_chrXI:5029109-5035385(+) | protein_length=1063 | sequence_SO=chromosome | SO=protein_coding_gene | is_pseudo=false	0	10.431	3	2	4	1	1063	118.3	8.51	12.83	2	1.288	1.779	0.955	1.041	2.385	1.688	0.789	1.703	0.92	18.9	24.3	33.5	18	19.6	45	31.8	14.9	32.1	17.3	High	High	High	High	High	High	High	High	High	High	1
2.6583e+18	FALSE	Medium	IsMasterProtein	TGGT1_320670-t26_1-p1	transcript=TGGT1_320670-t26_1 | gene=TGGT1_320670 | organism=Toxoplasma_gondii_GT1 | gene_product=Putative vacuolar protein sorting 16 [Source:UniProtKB/TrEMBL;Acc:S7UIZ1] | transcript_product=putative vacuolar protein sorting 16 | location=TGGT1_chrIV:94373-109895(+) | protein_length=920 | sequence_SO=chromosome | SO=protein_coding_gene | is_pseudo=false	0.021	1.819	1	1	1	1	920	101.4	7.27	2.21	1	1.5	1.644	1.292	1.144	0.913	0.58	0.653	0.76	0.459	18.9	28.4	31.1	24.4	21.6	17.3	11	12.3	14.4	8.7	High	High	High	High	High	High	High	High	High	High	1
-4.22744e+18	FALSE	High	IsMasterProtein	TGGT1_271290-t26_1-p1	transcript=TGGT1_271290-t26_1 | gene=TGGT1_271290 | organism=Toxoplasma_gondii_GT1 | gene_product=SURP motif domain-containing protein [Source:UniProtKB/TrEMBL;Acc:A0A125YGS9] | transcript_product=hypothetical protein | location=TGGT1_chrVIII:4582582-4591232(+) | protein_length=1116 | sequence_SO=chromosome | SO=protein_coding_gene | is_pseudo=false	0.002	4.264	1	1	1	1	1116	120.8	5.15	2.68	1	1.121	1.256	1.148	0.959	0.688	0.67	0.434	0.684	0.66	19.2	21.5	24.1	22.1	18.4	13.2	12.9	8.3	13.1	12.7	High	High	High	High	High	High	High	High	High	High	1
4.78891e+18	FALSE	High	IsMasterProtein	TGGT1_267480-t26_1-p1	transcript=TGGT1_267480-t26_1 | gene=TGGT1_267480 | organism=Toxoplasma_gondii_GT1 | gene_product=Putative tRNA (Guanine(26)-N(2))-dimethyltransferase [Source:UniProtKB/TrEMBL;Acc:S7UHU1] | transcript_product=putative tRNA (guanine(26)-N(2))-dimethyltransferase | location=TGGT1_chrIX:450756-457443(-) | protein_length=697 | sequence_SO=chromosome | SO=protein_coding_gene | is_pseudo=false	0	10.259	5	2	4	2	697	76.1	8.32	12.58	2	1.049	1.347	0.962	1.171	0.652	0.635	0.602	0.629	0.634	19.3	20.2	25.9	18.5	22.6	12.6	12.2	11.6	12.1	12.2	High	High	High	High	High	High	High	High	High	High	1
8.92703e+18	FALSE	High	IsMasterProtein	TGGT1_235380-t26_1-p1	transcript=TGGT1_235380-t26_1 | gene=TGGT1_235380 | organism=Toxoplasma_gondii_GT1 | gene_product=hypothetical protein | transcript_product=hypothetical protein | location=TGGT1_chrX:4705213-4712437(-) | protein_length=583 | sequence_SO=chromosome | SO=protein_coding_gene | is_pseudo=false	0.002	4.398	4	1	1	1	583	65.2	9.26	3.72	1	1.95	2.082	1.48	1.363	1.225	0.744	0.729	0.973	1.132	19.5	38.1	40.7	28.9	26.6	23.9	14.5	14.2	19	22.1	High	High	High	High	High	High	High	High	High	High	1
-7.58389e+18	FALSE	Medium	IsMasterProtein	TGGT1_230990-t26_1-p1	transcript=TGGT1_230990-t26_1 | gene=TGGT1_230990 | organism=Toxoplasma_gondii_GT1 | gene_product=hypothetical protein | transcript_product=hypothetical protein | location=TGGT1_chrVIII:1171049-1174495(+) | protein_length=1148 | sequence_SO=chromosome | SO=protein_coding_gene | is_pseudo=false	0.038	1.459	1	1	1	1	1148	124.9	6.7	0	1	1.394	1.888	1.47	1.425	0.871	1.051	0.988	0.656	0.381	19.6	27.4	37.1	28.9	28	17.1	20.6	19.4	12.9	7.5	High	High	High	High	High	High	High	High	High	High	1
-7.95467e+18	FALSE	High	IsMasterProtein	TGGT1_243310-t26_1-p1	transcript=TGGT1_243310-t26_1 | gene=TGGT1_243310 | organism=Toxoplasma_gondii_GT1 | gene_product=hypothetical protein | transcript_product=hypothetical protein | location=TGGT1_chrVI:2455507-2460208(+) | protein_length=1266 | sequence_SO=chromosome | SO=protein_coding_gene | is_pseudo=false	0.001	4.618	2	1	1	1	1266	132.4	8.54	0	1	1.231	1.394	1.014	1.102	1.395	1.035	0.945	1.022	0.939	19.6	24.2	27.4	19.9	21.6	27.4	20.3	18.6	20.1	18.4	High	High	High	High	High	High	High	High	High	High	1
4.2457e+18	FALSE	High	IsMasterProtein	TGGT1_247590-t26_1-p1	transcript=TGGT1_247590-t26_1 | gene=TGGT1_247590 | organism=Toxoplasma_gondii_GT1 | gene_product=Methyltransf_11 domain-containing protein [Source:UniProtKB/TrEMBL;Acc:S7W9T9] | transcript_product=methyltransferase domain-containing protein | location=TGGT1_chrXII:3359459-3364217(+) | protein_length=883 | sequence_SO=chromosome | SO=protein_coding_gene | is_pseudo=false	0.002	4.158	3	2	2	2	883	95.9	6.76	1.94	2	1.019	1.124	0.967	1.047	0.628	0.445	0.199	0.297	0.28	19.8	20.1	22.2	19.1	20.7	12.4	8.8	3.9	5.9	5.5	High	High	High	High	High	High	High	High	High	High	1
-1.35867e+18	FALSE	High	IsMasterProtein	TGGT1_310380-t26_1-p1	transcript=TGGT1_310380-t26_1 | gene=TGGT1_310380 | organism=Toxoplasma_gondii_GT1 | gene_product=Brix domain-containing protein [Source:UniProtKB/TrEMBL;Acc:S7USC7] | transcript_product=brix domain containing protein | location=TGGT1_chrXI:1271637-1274677(+) | protein_length=314 | sequence_SO=chromosome | SO=protein_coding_gene | is_pseudo=false	0	10.824	14	3	3	3	314	35.4	8.62	6.51	3	1.444	1.529	1.074	1.105	0.73	0.705	0.524	0.32	0.399	20	28.8	30.5	21.4	22.1	14.6	14.1	10.5	6.4	8	High	High	High	High	High	High	High	High	High	High	1
-4.21715e+18	FALSE	High	IsMasterProtein	TGGT1_262700-t26_1-p1	transcript=TGGT1_262700-t26_1 | gene=TGGT1_262700 | organism=Toxoplasma_gondii_GT1 | gene_product=TPR_REGION domain-containing protein [Source:UniProtKB/TrEMBL;Acc:S7WE11] | transcript_product=tetratricopeptide repeat-containing protein | location=TGGT1_chrVIIb:1043763-1053183(-) | protein_length=1556 | sequence_SO=chromosome | SO=protein_coding_gene | is_pseudo=false	0.002	4.236	1	2	2	2	1556	165.8	7.09	4.5	2	1.56	1.655	1.446	1.606	1.229	0.931	0.728	1.222	0.902	20	31.2	33.2	29	32.2	24.6	18.6	14.6	24.5	18.1	High	High	High	High	High	High	High	High	High	High	1
-4.41108e+18	FALSE	High	IsMasterProtein	TGGT1_262060-t26_1-p1	transcript=TGGT1_262060-t26_1 | gene=TGGT1_262060 | organism=Toxoplasma_gondii_GT1 | gene_product=hypothetical protein | transcript_product=hypothetical protein | location=TGGT1_chrVIIb:1374061-1380187(+) | protein_length=936 | sequence_SO=chromosome | SO=protein_coding_gene | is_pseudo=false	0	7.993	2	2	2	2	936	102.3	6.54	6.02	2	0.942	0.97	0.797	0.939	0.61	0.401	0.304	0.194	0.205	20.2	19	19.6	16.1	18.9	12.3	8.1	6.1	3.9	4.1	High	High	High	High	High	High	High	High	High	High	1
-8.09645e+18	FALSE	High	IsMasterProtein	TGGT1_288620-t26_1-p1	transcript=TGGT1_288620-t26_1 | gene=TGGT1_288620 | organism=Toxoplasma_gondii_GT1 | gene_product=Sulfhydryl oxidase [Source:UniProtKB/TrEMBL;Acc:A0A125YQC5] | transcript_product=Erv1 / Alr family protein | location=TGGT1_chrIX:2451913-2453502(-) | protein_length=204 | sequence_SO=chromosome | SO=protein_coding_gene | is_pseudo=false	0.001	5.498	19	3	4	3	204	22.2	6.43	8.34	3	1.018	1.175	1.241	0.804	0.717	0.827	0.543	0.649	0.785	20.3	20.7	23.8	25.2	16.3	14.5	16.8	11	13.2	15.9	High	High	High	High	High	High	High	High	High	High	1
8.19639e+18	FALSE	High	IsMasterProtein	TGGT1_313422-t26_1-p1	transcript=TGGT1_313422-t26_1 | gene=TGGT1_313422 | organism=Toxoplasma_gondii_GT1 | gene_product=hypothetical protein | transcript_product=hypothetical protein | location=TGGT1_chrXI:3325070-3329568(-) | protein_length=858 | sequence_SO=chromosome | SO=protein_coding_gene | is_pseudo=false	0	7.436	2	1	3	1	858	94.3	7.21	10.42	1	1.113	1.079	0.939	1.273	0.769	0.775	0.85	0.729	0.491	20.6	22.9	22.2	19.3	26.2	15.8	15.9	17.5	15	10.1	High	High	High	High	High	High	High	High	High	High	1
1.41647e+18	FALSE	High	IsMasterProtein	TGGT1_261690-t26_1-p1	transcript=TGGT1_261690-t26_1 | gene=TGGT1_261690 | organism=Toxoplasma_gondii_GT1 | gene_product=hypothetical protein | transcript_product=hypothetical protein | location=TGGT1_chrVIIb:1552220-1553711(-) | protein_length=234 | sequence_SO=chromosome | SO=protein_coding_gene | is_pseudo=false	0	10.177	10	1	2	1	234	26.8	4.92	10.6	1	1.525	1.413	0.92	1.351	0.847	0.889	0.834	0.932	0.756	20.7	31.6	29.2	19	28	17.5	18.4	17.3	19.3	15.6	High	High	High	High	High	High	High	High	High	High	1
1.56837e+18	FALSE	High	IsMasterProtein	TGGT1_310400-t26_1-p1	transcript=TGGT1_310400-t26_1 | gene=TGGT1_310400 | organism=Toxoplasma_gondii_GT1 | gene_product=Glycosyl transferase family 8 protein [Source:UniProtKB/TrEMBL;Acc:S7W1B4] | transcript_product=glycosyl transferase family 8 protein | location=TGGT1_chrXI:1282502-1283539(+) | protein_length=345 | sequence_SO=chromosome | SO=protein_coding_gene | is_pseudo=false	0	7.126	8	2	2	2	345	38.5	6.13	2.45	2	1.066	1.226	0.879	1.134	0.804	0.526	0.663	0.634	0.484	20.7	22.1	25.4	18.2	23.5	16.6	10.9	13.7	13.1	10	High	High	High	High	High	High	High	High	High	High	1
6.789e+17	FALSE	High	IsMasterProtein	TGGT1_229790-t26_1-p1	transcript=TGGT1_229790-t26_1 | gene=TGGT1_229790 | organism=Toxoplasma_gondii_GT1 | gene_product=hypothetical protein | transcript_product=hypothetical protein | location=TGGT1_chrVIII:444340-448577(-) | protein_length=1082 | sequence_SO=chromosome | SO=protein_coding_gene | is_pseudo=false	0.005	3.175	1	1	1	1	1082	112.5	9.13	0	1	0.743	1.33	0.793	0.858	0.482	0.499	0.423	0.424	0.421	20.7	15.4	27.5	16.4	17.8	10	10.3	8.8	8.8	8.7	High	High	High	High	High	High	High	High	High	High	1
4.12525e+18	FALSE	Medium	IsMasterProtein	TGGT1_245510-t26_1-p1	transcript=TGGT1_245510-t26_1 | gene=TGGT1_245510 | organism=Toxoplasma_gondii_GT1 | gene_product=Phospholipid-translocating P-type ATPase, flippase subfamily protein [Source:UniProtKB/TrEMBL;Acc:S7V185] | transcript_product=phospholipid-translocating P-type ATPase, flippase subfamily protein | location=TGGT1_chrXII:2263282-2278901(-) | protein_length=2427 | sequence_SO=chromosome | SO=protein_co…	0.018	1.896	0	1	1	1	2427	265.6	7.17	1.69	1	1.031	1.041	1.004	0.756	0.648	0.488	0.36	0.314	0.3	20.8	21.5	21.7	20.9	15.7	13.5	10.2	7.5	6.5	6.2	High	High	High	High	High	High	High	High	High	High	1
-1.45604e+18	FALSE	High	IsMasterProtein	TGGT1_237520-t26_1-p1	transcript=TGGT1_237520-t26_1 | gene=TGGT1_237520 | organism=Toxoplasma_gondii_GT1 | gene_product=SANT domain-containing protein [Source:UniProtKB/TrEMBL;Acc:S7UR69] | transcript_product=hypothetical protein | location=TGGT1_chrX:5838186-5841629(-) | protein_length=1147 | sequence_SO=chromosome | SO=protein_coding_gene | is_pseudo=false	0	10.996	4	2	2	2	1147	114.6	8.4	8.22	2	1.375	1.774	0.965	1.257	1.027	0.676	0.89	0.794	0.78	21.6	29.8	38.4	20.9	27.2	22.2	14.6	19.3	17.2	16.9	High	High	High	High	High	High	High	High	High	High	1
-4.09541e+18	FALSE	High	IsMasterProtein	TGGT1_222192-t26_1-p1	transcript=TGGT1_222192-t26_1 | gene=TGGT1_222192 | organism=Toxoplasma_gondii_GT1 | gene_product=DUF384 domain-containing protein [Source:UniProtKB/TrEMBL;Acc:S7UL89] | transcript_product=hypothetical protein | location=TGGT1_chrII:923041-929302(+) | protein_length=594 | sequence_SO=chromosome | SO=protein_coding_gene | is_pseudo=false	0	10.866	3	1	1	1	594	64.7	5.83	5.92	1	1.188	1.321	0.919	1.09	0.886	0.548	0.473	0.432	0.417	21.8	25.8	28.7	20	23.7	19.3	11.9	10.3	9.4	9.1	High	High	High	High	High	High	High	High	High	High	1
-7.20972e+18	FALSE	High	IsMasterProtein	TGGT1_223080-t26_1-p1	transcript=TGGT1_223080-t26_1 | gene=TGGT1_223080 | organism=Toxoplasma_gondii_GT1 | gene_product=hypothetical protein | transcript_product=hypothetical protein | location=TGGT1_chrII:1409911-1420473(-) | protein_length=2909 | sequence_SO=chromosome | SO=protein_coding_gene | is_pseudo=false	0.009	2.465	0	1	1	1	2909	306.4	9.01	2.19	1	1.037	1.203	0.661	0.864	0.642	0.457	0.32	0.329	0.377	21.8	22.6	26.2	14.4	18.8	14	10	7	7.2	8.2	High	High	High	High	High	High	High	High	High	High	1
7.71869e+18	FALSE	High	IsMasterProtein	TGGT1_248500-t26_1-p1	transcript=TGGT1_248500-t26_1 | gene=TGGT1_248500 | organism=Toxoplasma_gondii_GT1 | gene_product=Nup54 domain-containing protein [Source:UniProtKB/TrEMBL;Acc:S7V107] | transcript_product=hypothetical protein | location=TGGT1_chrXII:3823885-3826856(+) | protein_length=346 | sequence_SO=chromosome | SO=protein_coding_gene | is_pseudo=false	0	7.81	6	1	1	1	346	37.5	6.43	4.61	1	1.269	1.244	1.025	1.17	0.98	0.807	0.631	0.648	0.482	21.9	27.7	27.2	22.4	25.6	21.4	17.6	13.8	14.2	10.5	High	High	High	High	High	High	High	High	High	High	1
4.60178e+18	FALSE	High	IsMasterProtein	TGGT1_223570-t26_1-p1	transcript=TGGT1_223570-t26_1 | gene=TGGT1_223570 | organism=Toxoplasma_gondii_GT1 | gene_product=C2H2-type domain-containing protein [Source:UniProtKB/TrEMBL;Acc:S7UWR2] | transcript_product=hypothetical protein | location=TGGT1_chrX:3634987-3640689(-) | protein_length=830 | sequence_SO=chromosome | SO=protein_coding_gene | is_pseudo=false	0	9.092	4	1	1	1	830	85	8.22	5.67	1	1.192	1.506	0.776	0.96	0.478	0.529	0.346	0.381	0.436	22	26.2	33.1	17	21.1	10.5	11.6	7.6	8.4	9.6	High	High	High	High	High	High	High	High	High	High	1
-6.03873e+18	FALSE	Medium	IsMasterProtein	TGGT1_311250-t26_1-p1	transcript=TGGT1_311250-t26_1 | gene=TGGT1_311250 | organism=Toxoplasma_gondii_GT1 | gene_product=BTB domain-containing protein [Source:UniProtKB/TrEMBL;Acc:S7UTR3] | transcript_product=hypothetical protein | location=TGGT1_chrXI:1874376-1883214(+) | protein_length=1848 | sequence_SO=chromosome | SO=protein_coding_gene | is_pseudo=false	0.044	1.358	1	1	1	1	1848	201.2	5.92	1.78	1	1.244	1.9	0.962	1.19	0.907	0.909	0.611	0.544	0.657	22.1	27.5	41.9	21.2	26.3	20	20.1	13.5	12	14.5	High	High	High	High	High	High	High	High	High	High	1
8.93674e+18	FALSE	High	IsMasterProtein	TGGT1_261980-t26_1-p1	transcript=TGGT1_261980-t26_1 | gene=TGGT1_261980 | organism=Toxoplasma_gondii_GT1 | gene_product=Gorasp2-prov protein [Source:UniProtKB/TrEMBL;Acc:S7W6J8] | transcript_product=gorasp2-prov protein | location=TGGT1_chrVIIb:1419741-1424645(+) | protein_length=475 | sequence_SO=chromosome | SO=protein_coding_gene | is_pseudo=false	0.001	6.599	5	1	1	1	475	50.5	4.89	5.48	1	0.785	0.954	0.983	0.744	0.527	0.577	0.438	0.489	0.262	22.2	17.4	21.2	21.8	16.5	11.7	12.8	9.7	10.9	5.8	High	High	High	High	High	High	High	High	High	High	1
1.39315e+18	FALSE	High	IsMasterProtein	TGGT1_213880-t26_1-p1	transcript=TGGT1_213880-t26_1 | gene=TGGT1_213880 | organism=Toxoplasma_gondii_GT1 | gene_product=hypothetical protein | transcript_product=hypothetical protein | location=TGGT1_chrV:1268769-1269353(+) | protein_length=194 | sequence_SO=chromosome | SO=protein_coding_gene | is_pseudo=false	0	7.76	10	1	1	1	194	21.2	4.64	3.92	1	1.187	1.187	1.149	1.006	0.884	0.772	0.809	0.736	0.556	22.3	26.5	26.5	25.6	22.4	19.7	17.2	18	16.4	12.4	High	High	High	High	High	High	High	High	High	High	1
5.60799e+18	FALSE	High	IsMasterProtein	TGGT1_236000-t26_1-p1	transcript=TGGT1_236000-t26_1 | gene=TGGT1_236000 | organism=Toxoplasma_gondii_GT1 | gene_product=2Fe-2S ferredoxin-type domain-containing protein [Source:UniProtKB/TrEMBL;Acc:S7UQQ4] | transcript_product=putative ferredoxin | location=TGGT1_chrX:5123510-5126856(+) | protein_length=317 | sequence_SO=chromosome | SO=protein_coding_gene | is_pseudo=false	0	7.595	7	1	1	1	317	33.2	5.91	4.49	1	1.081	1.355	0.812	0.809	0.958	0.831	0.611	0.915	0.846	22.4	24.2	30.3	18.2	18.1	21.4	18.6	13.7	20.5	18.9	High	High	High	High	High	High	High	High	High	High	1
-3.14263e+17	FALSE	High	IsMasterProtein	TGGT1_202410-t26_1-p1	transcript=TGGT1_202410-t26_1 | gene=TGGT1_202410 | organism=Toxoplasma_gondii_GT1 | gene_product=CRAL-TRIO domain-containing protein [Source:UniProtKB/TrEMBL;Acc:S7UUZ0] | transcript_product=hypothetical protein | location=TGGT1_chrVIIa:3240895-3248510(+) | protein_length=1948 | sequence_SO=chromosome | SO=protein_coding_gene | is_pseudo=false	0.003	3.829	0	1	1	1	1948	209.2	7.24	2.95	1	1.042	1.494	0.861	1.183	0.783	0.829	0.816	0.678	0.677	22.5	23.4	33.6	19.4	26.6	17.6	18.6	18.4	15.2	15.2	High	High	High	High	High	High	High	High	High	High	1
5.11066e+18	FALSE	High	IsMasterProtein	TGGT1_276220-t26_1-p1	transcript=TGGT1_276220-t26_1 | gene=TGGT1_276220 | organism=Toxoplasma_gondii_GT1 | gene_product=hypothetical protein | transcript_product=hypothetical protein | location=TGGT1_chrIII:26218-29235(+) | protein_length=1005 | sequence_SO=chromosome | SO=protein_coding_gene | is_pseudo=false	0.001	6.238	3	3	4	3	1005	106.3	7.91	9.21	3	0.951	1.369	1.098	0.995	1.052	0.717	0.688	0.824	0.715	22.6	21.5	30.9	24.8	22.5	23.8	16.2	15.5	18.6	16.2	High	High	High	High	High	High	High	High	High	High	1
8.97888e+18	FALSE	High	IsMasterProtein	TGGT1_319910-t26_1-p1	transcript=TGGT1_319910-t26_1 | gene=TGGT1_319910 | organism=Toxoplasma_gondii_GT1 | gene_product=WD_REPEATS_REGION domain-containing protein [Source:UniProtKB/TrEMBL;Acc:S7UJE2] | transcript_product=WD domain, G-beta repeat-containing protein | location=TGGT1_chrIV:614295-620319(-) | protein_length=535 | sequence_SO=chromosome | SO=protein_coding_gene | is_pseudo=false	0	9.089	5	1	1	1	535	57.3	6.02	6.84	1	1.25	1.381	1.148	1.165	0.943	0.653	0.578	0.632	0.57	22.7	28.4	31.4	26.1	26.5	21.4	14.8	13.1	14.3	13	High	High	High	High	High	High	High	High	High	High	1
-2.70003e+18	FALSE	High	IsMasterProtein	TGGT1_262780-t26_1-p1	transcript=TGGT1_262780-t26_1 | gene=TGGT1_262780 | organism=Toxoplasma_gondii_GT1 | gene_product=FHA domain-containing protein [Source:UniProtKB/TrEMBL;Acc:S7UY40] | transcript_product=FHA domain-containing protein | location=TGGT1_chrVIIb:997278-1005795(-) | protein_length=1864 | sequence_SO=chromosome | SO=protein_coding_gene | is_pseudo=false	0.005	3.026	1	1	1	1	1864	196.3	5.3	2.59	1	1.319	1.4	0.874	0.999	0.806	0.6	0.616	0.563	0.4	23	30.4	32.2	20.1	23	18.6	13.8	14.2	13	9.2	High	High	High	High	High	High	High	High	High	High	1
2.82415e+18	FALSE	High	IsMasterProtein	TGGT1_232780-t26_1-p1	transcript=TGGT1_232780-t26_1 | gene=TGGT1_232780 | organism=Toxoplasma_gondii_GT1 | gene_product=hypothetical protein | transcript_product=hypothetical protein | location=TGGT1_chrVIII:2255308-2260311(-) | protein_length=713 | sequence_SO=chromosome | SO=protein_coding_gene | is_pseudo=false	0.008	2.531	2	1	1	1	713	77.6	7.39	2.39	1	1.131	1.494	1.162	0.97	1.399	1.01	1.051	1.455	1.092	23.3	26.4	34.9	27.1	22.6	32.7	23.6	24.5	34	25.5	High	High	High	High	High	High	High	High	High	High	1
-5.03878e+18	FALSE	High	IsMasterProtein	TGGT1_257110-t26_1-p1	transcript=TGGT1_257110-t26_1 | gene=TGGT1_257110 | organism=Toxoplasma_gondii_GT1 | gene_product=hypothetical protein | transcript_product=hypothetical protein | location=TGGT1_chrVIIb:4149291-4151532(-) | protein_length=526 | sequence_SO=chromosome | SO=protein_coding_gene | is_pseudo=false	0.009	2.496	2	1	1	1	526	57.3	7.59	2.5	1	1.544	1.469	1.307	1.077	0.87	0.488	0.552	0.563	0.417	23.5	36.4	34.6	30.8	25.4	20.5	11.5	13	13.3	9.8	High	High	High	High	High	High	High	High	High	High	1
-2.70749e+18	FALSE	High	IsMasterProtein	TGGT1_202920-t26_1-p1	transcript=TGGT1_202920-t26_1 | gene=TGGT1_202920 | organism=Toxoplasma_gondii_GT1 | gene_product=Glutamine amidotransferase type-1 domain-containing protein [Source:UniProtKB/TrEMBL;Acc:S7W3Q7] | transcript_product=p-aminobenzoic acid synthase | location=TGGT1_chrVIIa:2842071-2846072(-) | protein_length=988 | sequence_SO=chromosome | SO=protein_coding_gene | is_pseudo=false	0.005	2.924	1	1	1	1	988	107.1	6.04	2.39	1	1.189	1.188	0.979	0.966	0.85	0.828	0.585	0.631	0.516	23.5	28	28	23.1	22.7	20	19.5	13.8	14.9	12.1	High	High	High	High	High	High	High	High	High	High	1
6.58121e+17	FALSE	Low	IsMasterProtein	TGGT1_205650-t26_1-p1	transcript=TGGT1_205650-t26_1 | gene=TGGT1_205650 | organism=Toxoplasma_gondii_GT1 | gene_product=AP2 domain transcription factor AP2VIIa-3 [Source:UniProtKB/TrEMBL;Acc:S7W340] | transcript_product=AP2 domain transcription factor AP2VIIa-3 | location=TGGT1_chrVIIa:1146601-1151044(-) | protein_length=998 | sequence_SO=chromosome | SO=protein_coding_gene | is_pseudo=false	0.061	1.191	1	1	1	1	998	105.8	6.71	1.74	1	1.288	1.406	0.931	1.16	0.626	0.618	0.592	0.573	0.531	23.7	30.5	33.3	22	27.4	14.8	14.6	14	13.6	12.6	High	High	High	High	High	High	High	High	High	High	1
4.97112e+18	FALSE	High	IsMasterProtein	TGGT1_228150-t26_1-p1	transcript=TGGT1_228150-t26_1 | gene=TGGT1_228150 | organism=Toxoplasma_gondii_GT1 | gene_product=hypothetical protein | transcript_product=hypothetical protein | location=TGGT1_chrX:450432-458115(+) | protein_length=2115 | sequence_SO=chromosome | SO=protein_coding_gene | is_pseudo=false	0	8.957	1	3	3	3	2115	214.4	9.09	9.57	3	1.086	1.17	0.926	0.869	0.636	0.739	0.521	0.574	0.531	23.8	25.8	27.8	22	20.7	15.1	17.6	12.4	13.7	12.6	High	High	High	High	High	High	High	High	High	High	1
-6.8647e+17	FALSE	High	IsMasterProtein	TGGT1_305870-t26_1-p1	transcript=TGGT1_305870-t26_1 | gene=TGGT1_305870 | organism=Toxoplasma_gondii_GT1 | gene_product=Dolichyl-diphosphooligosaccharide--protein glycosyltransferase subunit OST2 [Source:UniProtKB/TrEMBL;Acc:S7UI02] | transcript_product=DAD family protein | location=TGGT1_chrIX:5420221-5421568(+) | protein_length=180 | sequence_SO=chromosome | SO=protein_coding_gene | is_pseudo=false	0.001	6.443	7	1	2	1	180	19.7	8.4	5.34	1	1.381	1.573	1.133	1.01	0.9	0.579	0.659	0.512	0.385	23.9	33	37.5	27	24.1	21.5	13.8	15.7	12.2	9.2	High	High	High	High	High	High	High	High	High	High	1
-5.38167e+18	FALSE	High	IsMasterProtein	TGGT1_240070-t26_1-p1	transcript=TGGT1_240070-t26_1 | gene=TGGT1_240070 | organism=Toxoplasma_gondii_GT1 | gene_product=RNA recognition motif-containing protein [Source:UniProtKB/TrEMBL;Acc:A0A125YPT7] | transcript_product=RNA recognition motif-containing protein | location=TGGT1_chrVI:1033205-1035458(-) | protein_length=307 | sequence_SO=chromosome | SO=protein_coding_gene | is_pseudo=false	0.007	2.606	8	1	1	1	307	32.1	8.56	2.8	1	1.231	1.606	1.027	1.139	1.118	0.738	0.632	0.713	0.806	23.9	29.4	38.3	24.5	27.2	26.7	17.6	15.1	17	19.2	High	High	High	High	High	High	High	High	High	High	1
7.22417e+18	FALSE	High	IsMasterProtein	TGGT1_232650-t26_1-p1	transcript=TGGT1_232650-t26_1 | gene=TGGT1_232650 | organism=Toxoplasma_gondii_GT1 | gene_product=ELM2 domain-containing protein [Source:UniProtKB/TrEMBL;Acc:S7V2V1] | transcript_product=hypothetical protein | location=TGGT1_chrVIII:2201161-2202939(-) | protein_length=442 | sequence_SO=chromosome | SO=protein_coding_gene | is_pseudo=false	0.001	6.874	4	1	2	1	442	48.2	8.69	6.51	1	1.117	1.318	1.206	1.198	1.122	1.19	0.842	1.073	1.144	24	26.8	31.6	28.9	28.7	26.9	28.5	20.2	25.7	27.4	High	High	High	High	High	High	High	High	High	High	1
-8.88838e+18	FALSE	High	IsMasterProtein	TGGT1_313130-t26_1-p1	transcript=TGGT1_313130-t26_1 | gene=TGGT1_313130 | organism=Toxoplasma_gondii_GT1 | gene_product=hypothetical protein | transcript_product=hypothetical protein | location=TGGT1_chrXI:3084517-3093785(+) | protein_length=1210 | sequence_SO=chromosome | SO=protein_coding_gene | is_pseudo=false	0	8.633	3	2	2	2	1210	134.2	4.87	7.36	2	1.225	1.319	0.773	0.844	0.741	0.498	0.546	0.462	0.436	24.4	29.9	32.2	18.9	20.6	18.1	12.2	13.3	11.3	10.6	High	High	High	High	High	High	High	High	High	High	1
-8.71469e+18	FALSE	High	IsMasterProtein	TGGT1_223855-t26_1-p1	transcript=TGGT1_223855-t26_1 | gene=TGGT1_223855 | organism=Toxoplasma_gondii_GT1 | gene_product=RRM domain-containing protein [Source:UniProtKB/TrEMBL;Acc:S7WBY7] | transcript_product=RNA recognition motif-containing protein | location=TGGT1_chrX:3429742-3436856(-) | protein_length=565 | sequence_SO=chromosome | SO=protein_coding_gene | is_pseudo=false	0	9.24	4	1	3	1	565	62.7	9.29	15.01	1	1.496	1.602	0.844	1.453	0.875	1.085	1.153	1.095	1.112	24.5	36.7	39.3	20.7	35.6	21.4	26.6	28.3	26.8	27.2	High	High	High	High	High	High	High	High	High	High	1
-4.9562e+18	FALSE	Medium	IsMasterProtein	TGGT1_235890-t26_1-p1	transcript=TGGT1_235890-t26_1 | gene=TGGT1_235890 | organism=Toxoplasma_gondii_GT1 | gene_product=Dual-specificity protein phosphatase [Source:UniProtKB/TrEMBL;Acc:S7UQP5] | transcript_product=dual-specificity protein phosphatase | location=TGGT1_chrX:5006715-5010015(-) | protein_length=165 | sequence_SO=chromosome | SO=protein_coding_gene | is_pseudo=false	0.027	1.702	8	1	1	1	165	18.7	5.07	2.27	1	1.1	1.189	0.798	1.062	0.788	0.696	0.486	0.591	0.448	24.8	27.3	29.5	19.8	26.3	19.5	17.3	12	14.7	11.1	High	High	High	High	High	High	High	High	High	High	1
-5.93384e+18	FALSE	High	IsMasterProtein	TGGT1_280510-t26_1-p1	transcript=TGGT1_280510-t26_1 | gene=TGGT1_280510 | organism=Toxoplasma_gondii_GT1 | gene_product=Dpy-30 motif protein [Source:UniProtKB/TrEMBL;Acc:A0A125YUX4] | transcript_product=Dpy-30 motif protein | location=TGGT1_chrVIIa:322179-322616(-) | protein_length=145 | sequence_SO=chromosome | SO=protein_coding_gene | is_pseudo=false	0.003	3.809	13	1	1	1	145	15.2	5.24	2.52	1	1.209	1.369	1.268	0.968	0.981	0.914	0.581	0.944	0.849	24.8	30	34	31.5	24	24.3	22.7	14.4	23.4	21.1	High	High	High	High	High	High	High	High	High	High	1
-4.53901e+18	FALSE	High	IsMasterProtein	TGGT1_313385-t26_1-p1	transcript=TGGT1_313385-t26_1 | gene=TGGT1_313385 | organism=Toxoplasma_gondii_GT1 | gene_product=hypothetical protein | transcript_product=hypothetical protein | location=TGGT1_chrXI:3296399-3296994(-) | protein_length=85 | sequence_SO=chromosome | SO=protein_coding_gene | is_pseudo=false	0.001	5.385	19	1	1	1	85	9.1	10.64	4.55	1	1.381	1.368	1.062	1.361	0.925	0.961	0.656	0.544	0.875	25.3	35	34.7	26.9	34.5	23.4	24.4	16.6	13.8	22.2	High	High	High	High	High	High	High	High	High	High	1
-8.19976e+18	FALSE	Medium	IsMasterProtein	TGGT1_272740-t26_1-p1	transcript=TGGT1_272740-t26_1 | gene=TGGT1_272740 | organism=Toxoplasma_gondii_GT1 | gene_product=DNA-directed RNA polymerase subunit beta [Source:UniProtKB/TrEMBL;Acc:S7WCA7] | transcript_product=DNA-directed RNA polymerase III RPC2 | location=TGGT1_chrVIII:3749490-3755483(+) | protein_length=1338 | sequence_SO=chromosome | SO=protein_coding_gene | is_pseudo=false	0.018	1.9	1	1	1	1	1338	147.1	8.41	2.19	1	1.575	1.331	1.078	1.08	0.654	0.536	0.297	0.43	0.246	25.3	39.9	33.7	27.3	27.4	16.6	13.6	7.5	10.9	6.2	High	High	High	High	High	High	High	High	High	High	1
-2.37358e+18	FALSE	Medium	IsMasterProtein	TGGT1_300110-t26_1-p1	transcript=TGGT1_300110-t26_1 | gene=TGGT1_300110 | organism=Toxoplasma_gondii_GT1 | gene_product=hypothetical protein | transcript_product=hypothetical protein | location=TGGT1_chrXII:169162-172319(+) | protein_length=287 | sequence_SO=chromosome | SO=protein_coding_gene | is_pseudo=false	0.045	1.35	3	1	1	1	287	31.5	5.16	2.41	1	1.123	0.921	0.896	0.637	0.489	0.413	0.305	0.273	0.338	25.8	28.9	23.7	23.1	16.4	12.6	10.6	7.9	7	8.7	High	High	High	High	High	High	High	High	High	High	1
-4.91619e+18	FALSE	Low	IsMasterProtein	TGGT1_211440-t26_1-p1	transcript=TGGT1_211440-t26_1 | gene=TGGT1_211440 | organism=Toxoplasma_gondii_GT1 | gene_product=hypothetical protein | transcript_product=hypothetical protein | location=TGGT1_chrIV:1640416-1651617(+) | protein_length=1665 | sequence_SO=chromosome | SO=protein_coding_gene | is_pseudo=false	0.071	1.091	1	1	1	1	1665	182.8	6.95	0	1	1.364	1.452	0.649	0.774	0.547	0.497	0.345	0.371	0.406	25.9	35.3	37.6	16.8	20	14.1	12.9	8.9	9.6	10.5	High	High	High	High	High	High	High	High	High	High	1
-6.86119e+18	FALSE	Medium	IsMasterProtein	TGGT1_315950-t26_1-p1	transcript=TGGT1_315950-t26_1 | gene=TGGT1_315950 | organism=Toxoplasma_gondii_GT1 | gene_product=RING-type domain-containing protein [Source:UniProtKB/TrEMBL;Acc:S7ULB6] | transcript_product=zinc finger, C3HC4 type (RING finger) domain-containing protein | location=TGGT1_chrXI:5038165-5044103(+) | protein_length=1822 | sequence_SO=chromosome | SO=protein_coding_gene | is_pseudo=false	0.011	2.328	0	1	1	1	1822	190.8	7.91	1.82	1	1.175	1.231	1.259	1.119	0.938	0.91	0.768	0.941	0.814	26.1	30.6	32.1	32.8	29.2	24.5	23.7	20	24.5	21.2	High	High	High	High	High	High	High	High	High	High	1
-4.15383e+18	FALSE	High	IsMasterProtein	TGGT1_227820-t26_1-p1	transcript=TGGT1_227820-t26_1 | gene=TGGT1_227820 | organism=Toxoplasma_gondii_GT1 | gene_product=hypothetical protein | transcript_product=hypothetical protein | location=TGGT1_chrX:705130-713114(+) | protein_length=2006 | sequence_SO=chromosome | SO=protein_coding_gene | is_pseudo=false	0	9.423	2	3	3	2	2006	213	6.67	6.38	3	1.744	1.65	1.447	1.058	1.321	1.017	0.737	1.098	0.68	26.2	45.7	43.2	37.9	27.7	34.6	26.6	19.3	28.8	17.8	High	High	High	High	High	High	High	High	High	High	1
-6.03846e+17	FALSE	High	IsMasterProtein	TGGT1_241010-t26_1-p1	transcript=TGGT1_241010-t26_1 | gene=TGGT1_241010 | organism=Toxoplasma_gondii_GT1 | gene_product=BTB domain-containing protein [Source:UniProtKB/TrEMBL;Acc:S7W6V8] | transcript_product=K+ channel tetramerisation domain-containing protein | location=TGGT1_chrVI:1592344-1594134(+) | protein_length=336 | sequence_SO=chromosome | SO=protein_coding_gene | is_pseudo=false	0.001	5.778	4	1	1	1	336	35.8	5.64	3.65	1	1.731	1.669	1.267	1.495	1.029	1.21	1.316	0.96	1.165	26.4	45.7	44.1	33.4	39.5	27.2	31.9	34.7	25.3	30.7	High	High	High	High	High	High	High	High	High	High	1
-2.73258e+18	FALSE	High	IsMasterProtein	TGGT1_215170-t26_1-p1	transcript=TGGT1_215170-t26_1 | gene=TGGT1_215170 | organism=Toxoplasma_gondii_GT1 | gene_product=Serine/threonine-protein phosphatase [Source:UniProtKB/TrEMBL;Acc:S7UR31] | transcript_product=putative serine/threonine-protein phosphatase 2A catalytic subunit beta isoform | location=TGGT1_chrX:6687141-6692981(-) | protein_length=552 | sequence_SO=chromosome | SO=protein_coding_gene | is_pseudo=fa…	0.003	3.599	3	1	1	1	552	60.4	5.64	2.88	1	1.194	1.557	1.141	0.801	0.74	0.616	0.459	0.574	0.327	26.4	31.5	41.1	30.1	21.1	19.5	16.3	12.1	15.1	8.6	High	High	High	High	High	High	High	High	High	High	1
-8.51388e+18	FALSE	High	IsMasterProtein	TGGT1_260390-t26_1-p1	transcript=TGGT1_260390-t26_1 | gene=TGGT1_260390 | organism=Toxoplasma_gondii_GT1 | gene_product=hypothetical protein | transcript_product=hypothetical protein | location=TGGT1_chrVIIb:2288724-2295585(-) | protein_length=1717 | sequence_SO=chromosome | SO=protein_coding_gene | is_pseudo=false	0.001	6.017	1	1	1	1	1717	185.8	6.65	3.89	1	1.054	1.394	0.76	0.926	0.912	0.73	0.647	0.527	0.659	26.4	27.8	36.8	20.1	24.4	24.1	19.3	17.1	13.9	17.4	High	High	High	High	High	High	High	High	High	High	1
-8.92909e+18	FALSE	High	IsMasterProtein	TGGT1_261490-t26_1-p1	transcript=TGGT1_261490-t26_1 | gene=TGGT1_261490 | organism=Toxoplasma_gondii_GT1 | gene_product=hypothetical protein | transcript_product=hypothetical protein | location=TGGT1_chrVIIb:1674000-1684152(+) | protein_length=2402 | sequence_SO=chromosome | SO=protein_coding_gene | is_pseudo=false	0	7.255	1	2	2	2	2402	263.4	10.56	5.1	2	1.061	1.104	0.778	0.942	0.721	0.689	0.652	0.671	0.557	26.4	28	29.2	20.5	24.9	19.1	18.2	17.2	17.7	14.7	High	High	High	High	High	High	High	High	High	High	1
4.18325e+18	FALSE	High	IsMasterProtein	TGGT1_203910-t26_1-p1	transcript=TGGT1_203910-t26_1 | gene=TGGT1_203910 | organism=Toxoplasma_gondii_GT1 | gene_product=Rab-GAP TBC domain-containing protein [Source:UniProtKB/TrEMBL;Acc:S7WA72] | transcript_product=TBC domain-containing protein | location=TGGT1_chrVIIa:2031779-2041259(-) | protein_length=2113 | sequence_SO=chromosome | SO=protein_coding_gene | is_pseudo=false	0.005	3.106	1	1	1	1	2113	228.6	6.67	2.85	1	1.019	1.112	0.995	0.704	0.396	0.545	0.455	0.387	0.43	26.5	27	29.4	26.3	18.6	10.5	14.4	12.1	10.2	11.4	High	High	High	High	High	High	High	High	High	High	1
-6.08778e+18	FALSE	High	IsMasterProtein	TGGT1_313690-t26_1-p1	transcript=TGGT1_313690-t26_1 | gene=TGGT1_313690 | organism=Toxoplasma_gondii_GT1 | gene_product=Sel1 repeat-containing protein [Source:UniProtKB/TrEMBL;Acc:S7UUJ6] | transcript_product=Sel1 repeat-containing protein | location=TGGT1_chrXI:3574530-3585874(-) | protein_length=1012 | sequence_SO=chromosome | SO=protein_coding_gene | is_pseudo=false	0.005	2.963	1	1	1	1	1012	111.5	6.28	3.32	1	1.325	1.191	1.147	1.082	0.865	0.709	0.748	0.545	0.594	26.5	35.1	31.6	30.4	28.7	22.9	18.8	19.8	14.5	15.8	High	High	High	High	High	High	High	High	High	High	1
4.37492e+18	FALSE	High	IsMasterProtein	TGGT1_217020-t26_1-p1	transcript=TGGT1_217020-t26_1 | gene=TGGT1_217020 | organism=Toxoplasma_gondii_GT1 | gene_product=ATPase, AFG1 family protein [Source:UniProtKB/TrEMBL;Acc:S7UM60] | transcript_product=ATPase, AFG1 family protein | location=TGGT1_chrXI:5634337-5643151(+) | protein_length=708 | sequence_SO=chromosome | SO=protein_coding_gene | is_pseudo=false	0.009	2.427	4	1	1	1	708	79.7	7.21	2.6	1	0.923	0.911	0.795	0.695	0.638	0.709	0.385	0.409	0.398	26.6	24.5	24.2	21.1	18.5	17	18.8	10.2	10.9	10.6	High	High	High	High	High	High	High	High	High	High	1
-7.48314e+18	FALSE	High	IsMasterProtein	TGGT1_316690-t26_1-p1	transcript=TGGT1_316690-t26_1 | gene=TGGT1_316690 | organism=Toxoplasma_gondii_GT1 | gene_product=hypothetical protein | transcript_product=hypothetical protein | location=TGGT1_chrXI:5450078-5450512(-) | protein_length=144 | sequence_SO=chromosome | SO=protein_coding_gene | is_pseudo=false	0.009	2.521	6	1	1	1	144	15.4	7.75	2.46	1	1.369	1.413	1.151	1.473	0.639	1.134	1.043	1.412	1.565	26.6	36.4	37.6	30.6	39.2	17	30.2	27.7	37.6	41.7	High	High	High	High	High	High	High	High	High	High	1
2.25385e+18	FALSE	High	IsMasterProtein	TGGT1_261760-t26_1-p1	transcript=TGGT1_261760-t26_1 | gene=TGGT1_261760 | organism=Toxoplasma_gondii_GT1 | gene_product=CDP-alcohol phosphatidyltransferase superfamily protein [Source:UniProtKB/TrEMBL;Acc:S7UYP1] | transcript_product=CDP-alcohol phosphatidyltransferase superfamily protein | location=TGGT1_chrVIIb:1513735-1518555(+) | protein_length=449 | sequence_SO=chromosome | SO=protein_coding_gene | is_pseudo=false	0.001	4.762	3	1	1	1	449	49.3	8.25	2.86	1	1.334	1.396	0.838	0.813	0.687	0.38	0.33	0.37	0.328	26.8	35.8	37.4	22.5	21.8	18.4	10.2	8.9	9.9	8.8	High	High	High	High	High	High	High	High	High	High	1
-7.18006e+17	FALSE	Medium	IsMasterProtein	TGGT1_220350-t26_1-p1	transcript=TGGT1_220350-t26_1 | gene=TGGT1_220350 | organism=Toxoplasma_gondii_GT1 | gene_product=AA_TRNA_LIGASE_II domain-containing protein [Source:UniProtKB/TrEMBL;Acc:S7VPG7] | transcript_product=tRNA ligases class II (D, K and N) domain-containing protein | location=TGGT1_chrV:213778-219673(+) | protein_length=1170 | sequence_SO=chromosome | SO=protein_coding_gene | is_pseudo=false	0.019	1.875	1	1	1	1	1170	127.2	9.22	1.76	1	1.316	1.444	0.732	0.768	0.62	0.31	0.396	0.282	0.349	26.8	35.3	38.7	19.6	20.6	16.6	8.3	10.6	7.6	9.4	High	High	High	High	High	High	High	High	High	High	1
-8.93407e+17	FALSE	High	IsMasterProtein	TGGT1_292055-t26_1-p1	transcript=TGGT1_292055-t26_1 | gene=TGGT1_292055 | organism=Toxoplasma_gondii_GT1 | gene_product=Calcium dependent protein kinase CDPK8 [Source:UniProtKB/TrEMBL;Acc:S7W446] | transcript_product=calcium dependent protein kinase CDPK8 | location=TGGT1_chrIX:4332594-4340938(-) | protein_length=1498 | sequence_SO=chromosome | SO=protein_coding_gene | is_pseudo=false	0.001	6.264	2	2	2	2	1498	161.3	6.1	5.4	2	0.975	1.413	0.962	0.855	0.791	0.457	0.441	0.399	0.455	26.9	26.3	38.1	25.9	23	21.3	12.3	11.9	10.7	12.3	High	High	High	High	High	High	High	High	High	High	1
-1.32543e+18	FALSE	High	IsMasterProtein	TGGT1_245432-t26_1-p1	transcript=TGGT1_245432-t26_1 | gene=TGGT1_245432 | organism=Toxoplasma_gondii_GT1 | gene_product=hypothetical protein | transcript_product=hypothetical protein | location=TGGT1_chrXII:2190528-2192456(-) | protein_length=411 | sequence_SO=chromosome | SO=protein_coding_gene | is_pseudo=false	0.001	5.185	2	1	2	1	411	46	9.51	5.72	1	1.1	1.416	1.103	0.692	0.687	0.453	0.677	0.575	0.451	27	29.7	38.3	29.8	18.7	18.6	12.2	18.3	15.5	12.2	High	High	High	High	High	High	High	High	High	High	1
8.02445e+18	FALSE	High	IsMasterProtein	TGGT1_212930-t26_1-p1	transcript=TGGT1_212930-t26_1 | gene=TGGT1_212930 | organism=Toxoplasma_gondii_GT1 | gene_product=Nfu_N domain-containing protein [Source:UniProtKB/TrEMBL;Acc:S7UNN8] | transcript_product=NifU family domain-containing protein | location=TGGT1_chrV:569656-571705(-) | protein_length=370 | sequence_SO=chromosome | SO=protein_coding_gene | is_pseudo=false	0	10.036	7	2	3	2	370	40.5	5.59	8.1	2	1.268	1.441	1.241	1.16	1.146	0.897	0.8	0.747	0.698	27.1	34.4	39.1	33.7	31.5	31.1	24.3	21.7	20.3	18.9	High	High	High	High	High	High	High	High	High	High	1
-2.99251e+18	FALSE	High	IsMasterProtein	TGGT1_281500-t26_1-p1	transcript=TGGT1_281500-t26_1 | gene=TGGT1_281500 | organism=Toxoplasma_gondii_GT1 | gene_product=hypothetical protein | transcript_product=hypothetical protein | location=TGGT1_chrVIIa:4056527-4059270(-) | protein_length=745 | sequence_SO=chromosome | SO=protein_coding_gene | is_pseudo=false	0	12.647	4	2	4	2	745	80.1	5.11	18.15	2	1.087	1.457	1.01	1.23	0.754	0.735	0.624	0.358	0.607	27.2	29.6	39.7	27.5	33.5	20.5	20	17	9.8	16.5	High	High	High	High	High	High	High	High	High	High	1
7.5433e+17	FALSE	High	IsMasterProtein	TGGT1_319090-t26_1-p1	transcript=TGGT1_319090-t26_1 | gene=TGGT1_319090 | organism=Toxoplasma_gondii_GT1 | gene_product=IgA-specific serine endopeptidase [Source:UniProtKB/TrEMBL;Acc:S7VYV1] | transcript_product=IgA-specific serine endopeptidase | location=TGGT1_chrIV:1027216-1030871(+) | protein_length=604 | sequence_SO=chromosome | SO=protein_coding_gene | is_pseudo=false	0	10.392	6	2	5	1	604	62.9	4.16	19.06	2	1.319	1.288	0.917	0.98	0.806	0.65	0.357	0.345	0.473	27.4	36.1	35.2	25.1	26.8	22	17.8	9.8	9.4	12.9	High	High	High	High	High	High	High	High	High	High	1
-1.51972e+18	FALSE	High	IsMasterProtein	TGGT1_224970-t26_1-p1	transcript=TGGT1_224970-t26_1 | gene=TGGT1_224970 | organism=Toxoplasma_gondii_GT1 | gene_product=Nucleolar protein,nop52 protein [Source:UniProtKB/TrEMBL;Acc:S7UWG5] | transcript_product=nucleolar protein | location=TGGT1_chrX:2534848-2538890(+) | protein_length=1095 | sequence_SO=chromosome | SO=protein_coding_gene | is_pseudo=false	0.005	2.955	1	1	1	1	1095	117	9.48	2.27	1	1.263	1.181	0.976	1.056	0.971	0.881	0.626	0.681	0.796	27.5	34.7	32.4	26.8	29	26.7	24.2	17.2	18.7	21.9	High	High	High	High	High	High	High	High	High	High	1
8.41157e+18	FALSE	Medium	IsMasterProtein	TGGT1_221850-t26_1-p1	transcript=TGGT1_221850-t26_1 | gene=TGGT1_221850 | organism=Toxoplasma_gondii_GT1 | gene_product=Putative prohibitin family protein [Source:UniProtKB/TrEMBL;Acc:S7ULD3] | transcript_product=putative prohibitin family protein | location=TGGT1_chrII:614246-616432(+) | protein_length=210 | sequence_SO=chromosome | SO=protein_coding_gene | is_pseudo=false	0.019	1.872	4	1	1	1	210	23.8	7.97	1.71	1	0.874	0.799	0.821	0.667	0.482	0.32	0.391	0.312	0.243	27.8	24.3	22.2	22.8	18.6	13.4	8.9	10.9	8.7	6.8	High	High	High	High	High	High	High	High	High	High	1
4.69128e+18	FALSE	Medium	IsMasterProtein	TGGT1_202480-t26_1-p1	transcript=TGGT1_202480-t26_1 | gene=TGGT1_202480 | organism=Toxoplasma_gondii_GT1 | gene_product=hypothetical protein | transcript_product=hypothetical protein | location=TGGT1_chrVIIa:3195653-3198003(+) | protein_length=430 | sequence_SO=chromosome | SO=protein_coding_gene | is_pseudo=false	0.025	1.74	2	1	1	1	430	43.6	7.01	0	1	1.131	1.563	0.982	1.043	0.955	0.676	0.517	0.68	0.959	27.9	31.5	43.6	27.4	29.1	26.6	18.8	14.4	19	26.7	High	High	High	High	High	High	High	High	High	High	1
-7.34145e+18	FALSE	Medium	IsMasterProtein	TGGT1_234390-t26_1-p1	transcript=TGGT1_234390-t26_1 | gene=TGGT1_234390 | organism=Toxoplasma_gondii_GT1 | gene_product=hypothetical protein | transcript_product=hypothetical protein | location=TGGT1_chrX:4229816-4231984(+) | protein_length=425 | sequence_SO=chromosome | SO=protein_coding_gene | is_pseudo=false	0.025	1.725	3	1	1	1	425	45.8	9.79	2.19	1	1.275	1.263	0.994	0.952	0.719	0.414	0.41	0.434	0.35	28	35.7	35.3	27.8	26.6	20.1	11.6	11.5	12.1	9.8	High	High	High	High	High	High	High	High	High	High	1
-6.89274e+17	FALSE	High	IsMasterProtein	TGGT1_227990-t26_1-p1	transcript=TGGT1_227990-t26_1 | gene=TGGT1_227990 | organism=Toxoplasma_gondii_GT1 | gene_product=hypothetical protein | transcript_product=hypothetical protein | location=TGGT1_chrX:593180-598760(+) | protein_length=900 | sequence_SO=chromosome | SO=protein_coding_gene | is_pseudo=false	0.005	3.199	1	1	1	1	900	98.6	9.44	2.59	1	1.402	1.455	0.771	0.7	0.523	0.358	0.319	0.342	0.337	28	39.2	40.7	21.6	19.6	14.6	10	8.9	9.6	9.4	High	High	High	High	High	High	High	High	High	High	1
-5.01279e+18	FALSE	High	IsMasterProtein	TGGT1_255740-t26_1-p1	transcript=TGGT1_255740-t26_1 | gene=TGGT1_255740 | organism=Toxoplasma_gondii_GT1 | gene_product=RTR1-type domain-containing protein [Source:UniProtKB/TrEMBL;Acc:S7WI29] | transcript_product=hypothetical protein | location=TGGT1_chrVIIb:4590851-4599916(-) | protein_length=1706 | sequence_SO=chromosome | SO=protein_coding_gene | is_pseudo=false	0	11.922	1	1	2	1	1706	182.1	4.86	11.86	1	1.044	1.175	1.014	1.067	1.174	0.846	0.652	0.824	0.912	28	29.2	32.9	28.4	29.9	32.9	23.7	18.2	23.1	25.5	High	High	High	High	High	High	High	High	High	High	1
-6.13308e+18	FALSE	High	IsMasterProtein	TGGT1_302050-t26_1-p1	transcript=TGGT1_302050-t26_1 | gene=TGGT1_302050 | organism=Toxoplasma_gondii_GT1 | gene_product=GTP_EFTU_D3 domain-containing protein [Source:UniProtKB/TrEMBL;Acc:S7VN96] | transcript_product=putative elongation factor tu, apicoplast | location=AAQM03000554:896-1006(-) | protein_length=36 | sequence_SO=apicoplast_chromosome | SO=protein_coding_gene | is_pseudo=false	0.003	3.421	33	1	1	1	36	3.9	9.7	2.01	1	1.178	1.45	0.798	0.821	0.579	0.346	0.315	0.221	0.249	28.3	33.3	41	22.6	23.2	16.4	9.8	8.9	6.3	7.1	High	High	High	High	High	High	High	High	High	High	1
-1.14116e+18	FALSE	Medium	IsMasterProtein	TGGT1_226350-t26_1-p1	transcript=TGGT1_226350-t26_1 | gene=TGGT1_226350 | organism=Toxoplasma_gondii_GT1 | gene_product=hypothetical protein | transcript_product=hypothetical protein | location=TGGT1_chrX:1595834-1601384(-) | protein_length=1633 | sequence_SO=chromosome | SO=protein_coding_gene | is_pseudo=false	0.04	1.44	1	1	1	1	1633	168	7.02	1.79	1	1.036	1.05	0.885	0.714	0.625	0.491	0.427	0.429	0.258	28.4	29.4	29.8	25.1	20.2	17.7	13.9	12.1	12.2	7.3	High	High	High	High	High	High	High	High	High	High	1
-1.01372e+16	FALSE	High	IsMasterProtein	TGGT1_253360-t26_1-p1	transcript=TGGT1_253360-t26_1 | gene=TGGT1_253360 | organism=Toxoplasma_gondii_GT1 | gene_product=t-SNARE coiled-coil homology domain-containing protein [Source:UniProtKB/TrEMBL;Acc:A0A125YRN5] | transcript_product=hypothetical protein | location=TGGT1_chrIII:852946-857015(-) | protein_length=391 | sequence_SO=chromosome | SO=protein_coding_gene | is_pseudo=false	0.001	6.918	4	1	1	1	391	43.6	6.58	3.53	1	1.642	2.415	1.088	1.541	1.445	1.244	0.829	0.699	0.681	28.4	46.7	68.7	31	43.8	41.1	35.4	23.6	19.9	19.4	High	High	High	High	High	High	High	High	High	High	1
-8.68883e+18	FALSE	High	IsMasterProtein	TGGT1_293610-t26_1-p1	transcript=TGGT1_293610-t26_1 | gene=TGGT1_293610 | organism=Toxoplasma_gondii_GT1 | gene_product=Amidohydro-rel domain-containing protein [Source:UniProtKB/TrEMBL;Acc:A0A125YRM4] | transcript_product=dihydroorotase | location=TGGT1_chrIa:438541-443390(+) | protein_length=403 | sequence_SO=chromosome | SO=protein_coding_gene | is_pseudo=false	0.001	5.879	5	2	3	2	403	44.2	6.09	7.98	2	1.236	1.146	1.016	0.861	0.872	0.859	0.664	0.661	0.651	28.5	35.2	32.6	28.9	24.5	24.8	24.5	18.9	18.8	18.5	High	High	High	High	High	High	High	High	High	High	1
-7.03491e+18	FALSE	Medium	IsMasterProtein	TGGT1_297780-t26_1-p1	transcript=TGGT1_297780-t26_1 | gene=TGGT1_297780 | organism=Toxoplasma_gondii_GT1 | gene_product=DNA topoisomerase 2 [Source:UniProtKB/TrEMBL;Acc:S7VTJ5] | transcript_product=ATPase/histidine kinase/DNA gyrase B/HSP90 domain-containing protein | location=TGGT1_chrII:1965698-1975996(+) | protein_length=1386 | sequence_SO=chromosome | SO=protein_coding_gene | is_pseudo=false	0.013	2.08	1	1	1	1	1386	148.2	8.73	2.23	1	1.146	1.026	0.933	0.773	0.613	0.394	0.333	0.309	0.335	28.8	33	29.5	26.9	22.3	17.6	11.3	9.6	8.9	9.6	High	High	High	High	High	High	High	High	High	High	1
-3.47243e+18	FALSE	High	IsMasterProtein	TGGT1_202470-t26_1-p1	transcript=TGGT1_202470-t26_1 | gene=TGGT1_202470 | organism=Toxoplasma_gondii_GT1 | gene_product=C2H2-type domain-containing protein [Source:UniProtKB/TrEMBL;Acc:S7UVH7] | transcript_product=rRNA metabolism protein, SBDS family protein | location=TGGT1_chrVIIa:3201329-3205558(+) | protein_length=735 | sequence_SO=chromosome | SO=protein_coding_gene | is_pseudo=false	0	7.923	4	3	4	3	735	80.5	8.22	8.6	3	1.304	1.087	1.002	1.057	0.633	0.444	0.487	0.492	0.527	28.9	37.7	31.4	29	30.5	18.3	12.8	14.1	14.2	15.2	High	High	High	High	High	High	High	High	High	High	1
-6.81871e+18	FALSE	Medium	IsMasterProtein	TGGT1_259200A-t26_1-p1	transcript=TGGT1_259200A-t26_1 | gene=TGGT1_259200A | organism=Toxoplasma_gondii_GT1 | gene_product=Na_H_Exchanger domain-containing protein [Source:UniProtKB/TrEMBL;Acc:S7UZ33] | transcript_product=Na+/H+ exchanger NHE1 | location=TGGT1_chrVIIb:2850485-2855582(-) | protein_length=847 | sequence_SO=chromosome | SO=protein_coding_gene | is_pseudo=false	0.018	1.902	2	1	2	1	847	92.1	6.74	4.24	1	1.366	1.271	1.22	1.009	0.956	1.045	1.048	0.982	0.722	28.9	39.5	36.8	35.3	29.2	27.7	30.2	30.3	28.4	20.9	High	High	High	High	High	High	High	High	High	High	1
1.28529e+18	FALSE	Medium	IsMasterProtein	TGGT1_201790-t26_1-p1	transcript=TGGT1_201790-t26_1 | gene=TGGT1_201790 | organism=Toxoplasma_gondii_GT1 | gene_product=FHA domain-containing protein [Source:UniProtKB/TrEMBL;Acc:S7UV44] | transcript_product=FHA domain-containing protein | location=TGGT1_chrVIIa:3683201-3688810(-) | protein_length=556 | sequence_SO=chromosome | SO=protein_coding_gene | is_pseudo=false	0.013	2.134	1	1	1	1	556	62.6	9.55	2.16	1	0.967	1.081	0.622	0.729	0.588	0.539	0.333	0.518	0.431	29	28	31.4	18.1	21.1	17.1	15.6	9.7	15	12.5	High	High	High	High	High	High	High	High	High	High	1
8.38921e+18	FALSE	Medium	IsMasterProtein	TGGT1_306300-t26_1-p1	transcript=TGGT1_306300-t26_1 | gene=TGGT1_306300 | organism=Toxoplasma_gondii_GT1 | gene_product=hypothetical protein | transcript_product=hypothetical protein | location=TGGT1_chrIX:5705474-5714461(+) | protein_length=2995 | sequence_SO=chromosome | SO=protein_coding_gene | is_pseudo=false	0.023	1.765	0	1	1	1	2995	317.4	7.52	2.6	1	1.031	1.375	1.042	1.256	0.945	0.91	0.856	0.75	0.591	29	29.9	39.9	30.3	36.5	27.4	26.4	24.8	21.8	17.2	High	High	High	High	High	High	High	High	High	High	1
-3.15262e+18	FALSE	High	IsMasterProtein	TGGT1_248830-t26_1-p1	transcript=TGGT1_248830-t26_1 | gene=TGGT1_248830 | organism=Toxoplasma_gondii_GT1 | gene_product=Phosphoinositide phospholipase C [Source:UniProtKB/TrEMBL;Acc:S7V0V3] | transcript_product=phosphoinositide phospholipase PIPLC | location=TGGT1_chrXII:4131545-4144034(-) | protein_length=1097 | sequence_SO=chromosome | SO=protein_coding_gene | is_pseudo=false	0	12.642	2	1	1	1	1097	121.9	7.69	7.2	1	1.127	1.264	0.983	1.196	0.779	0.603	0.581	0.515	0.444	29	32.7	36.7	28.5	34.7	22.6	17.5	16.9	14.9	12.9	High	High	High	High	High	High	High	High	High	High	1
6.67461e+18	FALSE	High	IsMasterProtein	TGGT1_258110-t26_1-p1	transcript=TGGT1_258110-t26_1 | gene=TGGT1_258110 | organism=Toxoplasma_gondii_GT1 | gene_product=N-acetylglucosaminylphosphatidylinositol deacetylase [Source:UniProtKB/TrEMBL;Acc:S7UYL4] | transcript_product=N-acetylglucosaminylphosphatidylinositol deacetylase | location=TGGT1_chrVIIb:3532662-3536407(-) | protein_length=383 | sequence_SO=chromosome | SO=protein_coding_gene | is_pseudo=false	0.001	5.795	5	2	2	2	383	43.4	9.31	3.53	2	1.325	1.563	1.027	1.132	0.84	0.483	0.417	0.539	0.636	29.3	38.8	45.7	30	33.1	24.6	14.1	12.2	15.8	18.6	High	High	High	High	High	High	High	High	High	High	1
-4.89133e+18	FALSE	Medium	IsMasterProtein	TGGT1_236820-t26_1-p1	transcript=TGGT1_236820-t26_1 | gene=TGGT1_236820 | organism=Toxoplasma_gondii_GT1 | gene_product=hypothetical protein | transcript_product=hypothetical protein | location=TGGT1_chrX:5416227-5418613(-) | protein_length=475 | sequence_SO=chromosome | SO=protein_coding_gene | is_pseudo=false	0.028	1.654	2	1	1	1	475	50.5	8.91	0	1	1.088	1.35	1.295	1.142	0.98	0.785	0.799	0.853	0.892	29.8	32.4	40.2	38.5	34	29.2	23.4	23.8	25.4	26.6	High	High	High	High	High	High	High	High	High	High	1
1.1024e+18	FALSE	Low	IsMasterProtein	TGGT1_203760-t26_1-p1	transcript=TGGT1_203760-t26_1 | gene=TGGT1_203760 | organism=Toxoplasma_gondii_GT1 | gene_product=hypothetical protein | transcript_product=hypothetical protein | location=TGGT1_chrVIIa:2153059-2162964(-) | protein_length=1396 | sequence_SO=chromosome | SO=protein_coding_gene | is_pseudo=false	0.084	1.044	1	1	1	1	1396	151	5.73	2.13	1	1.162	1.297	1.076	0.852	0.806	0.46	0.556	0.392	0.397	30	34.9	38.9	32.3	25.6	24.2	13.8	16.7	11.8	11.9	High	High	High	High	High	High	High	High	High	High	1
-3.68255e+18	FALSE	High	IsMasterProtein	TGGT1_218880-t26_1-p1	transcript=TGGT1_218880-t26_1 | gene=TGGT1_218880 | organism=Toxoplasma_gondii_GT1 | gene_product=Putative SF-assemblin [Source:UniProtKB/TrEMBL;Acc:S7V259] | transcript_product=putative SF-assemblin | location=TGGT1_chrXII:1177534-1181051(-) | protein_length=268 | sequence_SO=chromosome | SO=protein_coding_gene | is_pseudo=false	0.001	4.8	5	1	2	1	268	30.6	5.26	5.21	1	1.691	1.6	0.95	1.197	1.009	0.676	0.694	0.626	0.685	30.1	50.9	48.2	28.6	36	30.4	20.3	20.9	18.8	20.6	High	High	High	High	High	High	High	High	High	High	1
-7.38779e+18	FALSE	High	IsMasterProtein	TGGT1_201180A-t26_1-p1	transcript=TGGT1_201180A-t26_1 | gene=TGGT1_201180A | organism=Toxoplasma_gondii_GT1 | gene_product=hypothetical protein | transcript_product=hypothetical protein | location=TGGT1_chrVIIa:3887165-3889485(-) | protein_length=774 | sequence_SO=chromosome | SO=protein_coding_gene | is_pseudo=false	0.001	6.901	2	1	2	1	774	83.1	4.32	5.44	1	1.133	1.227	0.942	1.079	1.081	0.829	0.789	0.727	0.87	30.3	34.3	37.2	28.6	32.7	32.8	25.1	23.9	22	26.4	High	High	High	High	High	High	High	High	High	High	1
-4.4557e+18	FALSE	High	IsMasterProtein	TGGT1_286590-t26_1-p1	transcript=TGGT1_286590-t26_1 | gene=TGGT1_286590 | organism=Toxoplasma_gondii_GT1 | gene_product=Microtubule associated protein SPM2 [Source:UniProtKB/TrEMBL;Acc:S7VWS9] | transcript_product=microtubule associated protein SPM2 | location=TGGT1_chrV:1625039-1626577(+) | protein_length=357 | sequence_SO=chromosome | SO=protein_coding_gene | is_pseudo=false	0	8.198	5	2	2	2	357	39.6	9.92	5.17	2	1.434	2.038	1.147	2.001	0.928	1.864	1.978	1.976	1.876	30.3	43.5	61.8	34.8	60.7	28.1	56.5	60	59.9	56.9	High	High	High	High	High	High	High	High	High	High	1
6.90423e+18	FALSE	Medium	IsMasterProtein	TGGT1_231930-t26_1-p1	transcript=TGGT1_231930-t26_1 | gene=TGGT1_231930 | organism=Toxoplasma_gondii_GT1 | gene_product=RING-type domain-containing protein [Source:UniProtKB/TrEMBL;Acc:S7V3F4] | transcript_product=hypothetical protein | location=TGGT1_chrVIII:1647608-1653496(-) | protein_length=805 | sequence_SO=chromosome | SO=protein_coding_gene | is_pseudo=false	0.037	1.475	1	1	1	1	805	85.8	5.07	2.29	1	1.029	1.001	0.859	0.794	0.717	0.562	0.21	0.511	0.385	30.6	31.5	30.6	26.3	24.3	21.9	17.2	6.4	15.6	11.8	High	High	High	High	High	High	High	High	High	High	1
-3.69203e+18	FALSE	High	IsMasterProtein	TGGT1_288710-t26_1-p1	transcript=TGGT1_288710-t26_1 | gene=TGGT1_288710 | organism=Toxoplasma_gondii_GT1 | gene_product=hypothetical protein | transcript_product=hypothetical protein | location=TGGT1_chrIX:2510070-2515657(-) | protein_length=661 | sequence_SO=chromosome | SO=protein_coding_gene | is_pseudo=false	0	18.154	9	4	5	4	661	71.4	8.38	17.07	4	1.224	1.495	1.007	0.998	0.946	0.774	0.502	0.632	0.514	31.3	38.2	46.7	31.5	31.2	29.6	24.2	15.7	19.7	16.1	High	High	High	High	High	High	High	High	High	High	1
6.63019e+18	FALSE	High	IsMasterProtein	TGGT1_281490-t26_1-p1	transcript=TGGT1_281490-t26_1 | gene=TGGT1_281490 | organism=Toxoplasma_gondii_GT1 | gene_product=Putative glutamine amidotransferase subunit pdxt [Source:UniProtKB/TrEMBL;Acc:A0A125YZ51] | transcript_product=putative glutamine amidotransferase subunit pdxt | location=TGGT1_chrVIIa:4051019-4054801(+) | protein_length=284 | sequence_SO=chromosome | SO=protein_coding_gene | is_pseudo=false	0	11.705	13	3	3	3	284	30.5	7.14	8.35	3	1.019	1.219	0.933	0.943	0.872	0.885	0.77	0.81	0.747	31.4	32	38.2	29.3	29.6	27.3	27.8	24.2	25.4	23.4	High	High	High	High	High	High	High	High	High	High	1
-8.80338e+18	FALSE	Medium	IsMasterProtein	TGGT1_293710-t26_1-p1	transcript=TGGT1_293710-t26_1 | gene=TGGT1_293710 | organism=Toxoplasma_gondii_GT1 | gene_product=Zn-finger in Ran binding protein and others domain-containing protein [Source:UniProtKB/TrEMBL;Acc:A0A125YUP5] | transcript_product=Zn-finger in Ran binding protein and others domain-containing protein | location=TGGT1_chrIa:505713-507776(-) | protein_length=687 | sequence_SO=chromosome | SO=protein_…	0.017	1.971	2	1	1	1	687	70.6	6.48	2.17	1	1.513	1.726	1.118	1.337	1.325	0.94	1.031	1.017	1.018	31.4	47.4	54.1	35.1	41.9	41.6	29.5	32.3	31.9	31.9	High	High	High	High	High	High	High	High	High	High	1
3.51467e+18	FALSE	Medium	IsMasterProtein	TGGT1_216460-t26_1-p1	transcript=TGGT1_216460-t26_1 | gene=TGGT1_216460 | organism=Toxoplasma_gondii_GT1 | gene_product=hypothetical protein | transcript_product=hypothetical protein | location=TGGT1_chrXI:6052022-6054177(+) | protein_length=604 | sequence_SO=chromosome | SO=protein_coding_gene | is_pseudo=false	0.044	1.363	2	1	1	1	604	65.1	5.73	2.16	1	1.25	1.35	1.17	1.029	1.089	0.856	0.636	0.789	0.774	31.5	39.3	42.5	36.8	32.4	34.3	27	20	24.8	24.3	High	High	High	High	High	High	High	High	High	High	1	Phospho [S547]
2.3289e+18	FALSE	High	IsMasterProtein	TGGT1_259980-t26_1-p1	transcript=TGGT1_259980-t26_1 | gene=TGGT1_259980 | organism=Toxoplasma_gondii_GT1 | gene_product=J domain-containing protein [Source:UniProtKB/TrEMBL;Acc:S7W763] | transcript_product=DnaJ domain-containing protein | location=TGGT1_chrVIIb:2531634-2539640(-) | protein_length=476 | sequence_SO=chromosome | SO=protein_coding_gene | is_pseudo=false	0.003	3.886	3	1	1	1	476	53.5	9.36	2	1	1.184	1.18	0.756	0.93	0.447	0.548	0.33	0.326	0.332	31.6	37.4	37.2	23.9	29.3	14.1	17.3	10.4	10.3	10.5	High	High	High	High	High	High	High	High	High	High	1
-3.37827e+18	FALSE	High	IsMasterProtein	TGGT1_249580-t26_1-p1	transcript=TGGT1_249580-t26_1 | gene=TGGT1_249580 | organism=Toxoplasma_gondii_GT1 | gene_product=hypothetical protein | transcript_product=hypothetical protein | location=TGGT1_chrXII:4596459-4598513(+) | protein_length=684 | sequence_SO=chromosome | SO=protein_coding_gene | is_pseudo=false	0.002	4.462	2	1	2	1	684	74.3	7.37	4.26	1	1.375	1.535	0.98	0.893	0.969	0.754	0.635	0.694	0.403	31.6	43.4	48.5	30.9	28.2	30.6	23.8	20.1	21.9	12.7	High	High	High	High	High	High	High	High	High	High	1
3.29969e+18	FALSE	High	IsMasterProtein	TGGT1_216030B-t26_1-p1	transcript=TGGT1_216030B-t26_1 | gene=TGGT1_216030B | organism=Toxoplasma_gondii_GT1 | gene_product=hypothetical protein | transcript_product=hypothetical protein | location=TGGT1_chrXI:6369639-6370661(-) | protein_length=340 | sequence_SO=chromosome | SO=protein_coding_gene | is_pseudo=false	0	7.659	9	2	2	2	340	35	4.37	5.5	2	1.138	1.412	0.933	1.084	1	0.639	0.52	0.518	0.523	31.9	36.3	45	29.7	34.6	31.9	20.4	16.6	16.5	16.7	High	High	High	High	High	High	High	High	High	High	1
9.03902e+18	FALSE	Medium	IsMasterProtein	TGGT1_229780-t26_1-p1	transcript=TGGT1_229780-t26_1 | gene=TGGT1_229780 | organism=Toxoplasma_gondii_GT1 | gene_product=GHMP kinase, N-terminal domain-containing protein [Source:UniProtKB/TrEMBL;Acc:S7V341] | transcript_product=GHMP kinase, N-terminal domain-containing protein | location=TGGT1_chrVIII:433412-442672(+) | protein_length=923 | sequence_SO=chromosome | SO=protein_coding_gene | is_pseudo=false	0.04	1.42	2	1	1	1	923	98.7	8.06	1.69	1	1.513	1.806	5.114	1.23	0.474	0.767	0.677	0.608	0.516	31.9	48.2	57.6	163.1	39.2	15.1	24.4	21.6	19.4	16.5	High	High	High	High	High	High	High	High	High	High	1
5.48387e+18	FALSE	High	IsMasterProtein	TGGT1_248130-t26_1-p1	transcript=TGGT1_248130-t26_1 | gene=TGGT1_248130 | organism=Toxoplasma_gondii_GT1 | gene_product=hypothetical protein | transcript_product=hypothetical protein | location=TGGT1_chrXII:3609842-3616211(+) | protein_length=861 | sequence_SO=chromosome | SO=protein_coding_gene | is_pseudo=false	0.003	3.821	2	1	1	1	861	93	8.78	2.55	1	0.915	1.165	0.641	0.776	0.973	0.537	0.387	0.625	0.491	32.3	29.6	37.6	20.7	25.1	31.4	17.3	12.5	20.2	15.8	High	High	High	High	High	High	High	High	High	High	1
-7.27471e+17	FALSE	Medium	IsMasterProtein	TGGT1_306280-t26_1-p1	transcript=TGGT1_306280-t26_1 | gene=TGGT1_306280 | organism=Toxoplasma_gondii_GT1 | gene_product=Mediator of RNA polymerase II transcription subunit 7 [Source:UniProtKB/TrEMBL;Acc:A0A125YJP7] | transcript_product=mediator complex subunit MED7 | location=TGGT1_chrIX:5688093-5688875(-) | protein_length=260 | sequence_SO=chromosome | SO=protein_coding_gene | is_pseudo=false	0.013	2.139	3	1	2	1	260	28.7	5.77	5.69	1	1.356	1.731	0.994	1.391	1.024	0.758	0.643	0.625	0.769	32.3	43.8	55.9	32.1	44.9	33.1	24.5	20.8	20.2	24.9	High	High	High	High	High	High	High	High	High	High	1
-4.32258e+18	FALSE	High	IsMasterProtein	TGGT1_213300-t26_1-p1	transcript=TGGT1_213300-t26_1 | gene=TGGT1_213300 | organism=Toxoplasma_gondii_GT1 | gene_product=hypothetical protein | transcript_product=hypothetical protein | location=TGGT1_chrV:771094-788399(+) | protein_length=4983 | sequence_SO=chromosome | SO=protein_coding_gene | is_pseudo=false	0	8.86	1	3	8	2	4983	538.1	6.3	17.82	3	1.281	1.613	1.267	1.071	1.038	0.738	0.582	0.712	0.598	32.4	41.5	52.3	41.1	34.7	33.7	23.9	18.9	23.1	19.4	High	High	High	High	High	High	High	High	High	High	1
-1.6879e+18	FALSE	High	IsMasterProtein	TGGT1_305760-t26_1-p1	transcript=TGGT1_305760-t26_1 | gene=TGGT1_305760 | organism=Toxoplasma_gondii_GT1 | gene_product=SP-RING-type domain-containing protein [Source:UniProtKB/TrEMBL;Acc:S7VQI5] | transcript_product=hypothetical protein | location=TGGT1_chrIX:5333566-5337379(-) | protein_length=334 | sequence_SO=chromosome | SO=protein_coding_gene | is_pseudo=false	0	18.088	13	2	4	2	334	37.2	4.94	17.83	2	1.503	1.741	1.355	1.576	1.139	1.271	1.304	1.145	1.073	32.5	48.8	56.6	44	51.2	37	41.3	42.4	37.2	34.9	High	High	High	High	High	High	High	High	High	High	1
-1.28929e+18	FALSE	High	IsMasterProtein	TGGT1_220190-t26_1-p1	transcript=TGGT1_220190-t26_1 | gene=TGGT1_220190 | organism=Toxoplasma_gondii_GT1 | gene_product=t-SNARE coiled-coil homology domain-containing protein [Source:UniProtKB/TrEMBL;Acc:S7UH53] | transcript_product=hypothetical protein | location=TGGT1_chrV:94557-99395(-) | protein_length=560 | sequence_SO=chromosome | SO=protein_coding_gene | is_pseudo=false	0.006	2.835	1	1	1	1	560	60.9	8.47	2.5	1	1.469	1.763	0.88	1.488	0.485	0.891	0.846	0.831	0.662	32.6	47.9	57.5	28.7	48.6	15.8	29.1	27.6	27.1	21.6	High	High	High	High	High	High	High	High	High	High	1
7.35847e+18	FALSE	Medium	IsMasterProtein	TGGT1_220200-t26_1-p1	transcript=TGGT1_220200-t26_1 | gene=TGGT1_220200 | organism=Toxoplasma_gondii_GT1 | gene_product=hypothetical protein | transcript_product=hypothetical protein | location=TGGT1_chrV:100743-103365(+) | protein_length=680 | sequence_SO=chromosome | SO=protein_coding_gene | is_pseudo=false	0.013	2.06	2	1	1	1	680	74.9	6.29	2.01	1	1.125	1.456	0.913	1.062	0.622	0.589	0.464	0.578	0.503	32.6	36.7	47.5	29.8	34.7	20.3	19.2	15.1	18.9	16.4	High	High	High	High	High	High	High	High	High	High	1
-3.29532e+18	FALSE	High	IsMasterProtein	TGGT1_215490-t26_1-p1	transcript=TGGT1_215490-t26_1 | gene=TGGT1_215490 | organism=Toxoplasma_gondii_GT1 | gene_product=Transporter, major facilitator family protein [Source:UniProtKB/TrEMBL;Acc:S7W572] | transcript_product=transporter, major facilitator family protein | location=TGGT1_chrX:6872539-6874346(+) | protein_length=534 | sequence_SO=chromosome | SO=protein_coding_gene | is_pseudo=false	0.001	5.49	3	1	1	1	534	58.1	5.95	2.9	1	1.13	0.753	0.628	0.627	0.394	0.18	0.229	0.298	0.224	32.7	36.9	24.6	20.5	20.5	12.9	5.9	7.5	9.7	7.3	High	High	High	High	High	High	High	High	High	High	1
-7.33619e+18	FALSE	High	IsMasterProtein	TGGT1_270800-t26_1-p1	transcript=TGGT1_270800-t26_1 | gene=TGGT1_270800 | organism=Toxoplasma_gondii_GT1 | gene_product=GAF domain-containing protein [Source:UniProtKB/TrEMBL;Acc:S7V534] | transcript_product=GAF domain-containing protein | location=TGGT1_chrVIII:4984957-4987035(+) | protein_length=692 | sequence_SO=chromosome | SO=protein_coding_gene | is_pseudo=false	0.002	4.432	2	2	3	2	692	74.1	7.24	6.13	2	1.269	1.801	1.107	0.883	1.015	0.747	0.693	0.877	0.92	32.8	41.7	59.2	36.4	29	33.3	24.5	22.8	28.8	30.2	High	High	High	High	High	High	High	High	High	High	1
-1.74559e+17	FALSE	High	IsMasterProtein	TGGT1_239320-t26_1-p1	transcript=TGGT1_239320-t26_1 | gene=TGGT1_239320 | organism=Toxoplasma_gondii_GT1 | gene_product=BolA family protein [Source:UniProtKB/TrEMBL;Acc:S7UR55] | transcript_product=BolA family protein | location=TGGT1_chrVI:540807-543071(-) | protein_length=286 | sequence_SO=chromosome | SO=protein_coding_gene | is_pseudo=false	0	11.934	10	1	2	1	286	31	9.57	9.24	1	1.198	1.569	1.063	1.094	1.014	0.782	0.621	0.647	0.598	32.8	39.3	51.5	34.9	35.9	33.3	25.7	20.4	21.3	19.6	High	High	High	High	High	High	High	High	High	High	1
-3.79276e+17	FALSE	High	IsMasterProtein	TGGT1_249260-t26_1-p1	transcript=TGGT1_249260-t26_1 | gene=TGGT1_249260 | organism=Toxoplasma_gondii_GT1 | gene_product=Protein kinase domain-containing protein [Source:UniProtKB/TrEMBL;Acc:S7W928] | transcript_product=putative cell-cycle-associated protein kinase CDK | location=TGGT1_chrXII:4333758-4345741(-) | protein_length=1910 | sequence_SO=chromosome | SO=protein_coding_gene | is_pseudo=false	0.003	3.798	1	2	2	1	1910	212.1	9.13	2.53	2	1.221	1.225	0.862	1.162	0.995	0.668	0.73	0.677	0.495	33.1	40.4	40.5	28.5	38.4	32.9	22.1	24.1	22.4	16.4	High	High	High	High	High	High	High	High	High	High	1
-4.68536e+18	FALSE	Medium	IsMasterProtein	TGGT1_257420-t26_1-p1	transcript=TGGT1_257420-t26_1 | gene=TGGT1_257420 | organism=Toxoplasma_gondii_GT1 | gene_product=hypothetical protein | transcript_product=hypothetical protein | location=TGGT1_chrVIIb:3995821-3997596(-) | protein_length=591 | sequence_SO=chromosome | SO=protein_coding_gene | is_pseudo=false	0.013	2.054	3	1	1	1	591	63.4	6.62	1.99	1	2.35	1.35	0.978	1.48	0.878	0.987	0.885	0.721	0.755	33.2	77.9	44.8	32.4	49.1	29.1	32.7	29.3	23.9	25	High	High	High	High	High	High	High	High	High	High	1
6.31137e+18	FALSE	High	IsMasterProtein	TGGT1_238400-t26_1-p1	transcript=TGGT1_238400-t26_1 | gene=TGGT1_238400 | organism=Toxoplasma_gondii_GT1 | gene_product=SAC domain-containing protein [Source:UniProtKB/TrEMBL;Acc:S7URL6] | transcript_product=endonuclease/exonuclease/phosphatase domain-containing protein | location=TGGT1_chrVI:193990-207145(+) | protein_length=2684 | sequence_SO=chromosome | SO=protein_coding_gene | is_pseudo=false	0.001	6.766	1	2	2	2	2684	287.5	6.92	4.76	2	1.219	1.297	0.842	0.758	0.788	0.595	0.521	0.486	0.528	33.6	40.9	43.6	28.3	25.4	26.5	20	17.5	16.3	17.7	High	High	High	High	High	High	High	High	High	High	1
-2.33403e+18	FALSE	High	IsMasterProtein	TGGT1_257640-t26_1-p1	transcript=TGGT1_257640-t26_1 | gene=TGGT1_257640 | organism=Toxoplasma_gondii_GT1 | gene_product=hypothetical protein | transcript_product=hypothetical protein | location=TGGT1_chrVIIb:3866839-3869955(+) | protein_length=858 | sequence_SO=chromosome | SO=protein_coding_gene | is_pseudo=false	0.001	6.615	3	1	1	1	858	93.1	5.48	5.08	1	0.942	1.035	0.836	0.784	0.703	0.577	0.495	0.525	0.458	34	32	35.2	28.4	26.7	23.9	19.6	16.8	17.8	15.6	High	High	High	High	High	High	High	High	High	High	1
-8.31873e+18	FALSE	High	IsMasterProtein	TGGT1_274120-t26_1-p1	transcript=TGGT1_274120-t26_1 | gene=TGGT1_274120 | organism=Toxoplasma_gondii_GT1 | gene_product=hypothetical protein | transcript_product=hypothetical protein | location=TGGT1_chrVIII:3007395-3013886(-) | protein_length=674 | sequence_SO=chromosome | SO=protein_coding_gene | is_pseudo=false	0.009	2.421	2	1	1	1	674	74.3	7.71	0	1	1.326	1.431	0.918	1.468	0.882	1.103	1.198	0.664	0.996	34	45.1	48.7	31.2	49.9	30	37.5	40.7	22.6	33.9	High	High	High	High	High	High	High	High	High	High	1
4.30807e+18	FALSE	High	IsMasterProtein	TGGT1_288000-t26_1-p1	transcript=TGGT1_288000-t26_1 | gene=TGGT1_288000 | organism=Toxoplasma_gondii_GT1 | gene_product=bMG10 domain-containing protein [Source:UniProtKB/TrEMBL;Acc:S7UPE0] | transcript_product=hypothetical protein | location=TGGT1_chrIX:2102790-2113779(+) | protein_length=2983 | sequence_SO=chromosome | SO=protein_coding_gene | is_pseudo=false	0.001	6.592	1	3	3	3	2983	327.8	8.09	4.86	3	1.35	1.294	1.196	1.035	0.88	0.597	0.533	0.448	0.513	34.1	46	44.1	40.8	35.3	30	20.4	18.2	15.3	17.5	High	High	High	High	High	High	High	High	High	High	1
-7.16728e+18	FALSE	Medium	IsMasterProtein	TGGT1_282150-t26_1-p1	transcript=TGGT1_282150-t26_1 | gene=TGGT1_282150 | organism=Toxoplasma_gondii_GT1 | gene_product=hypothetical protein | transcript_product=hypothetical protein | location=TGGT1_chrVIIa:4306901-4317324(+) | protein_length=891 | sequence_SO=chromosome | SO=protein_coding_gene | is_pseudo=false	0.014	2.034	2	1	1	1	891	98.4	5.03	2.19	1	1.538	1.838	0.882	1.451	0.947	1.258	1.324	1.104	1.656	34.1	52.4	62.7	30.1	49.5	32.3	42.9	45.2	37.7	56.5	High	High	High	High	High	High	High	High	High	High	1
3.59232e+17	FALSE	High	IsMasterProtein	TGGT1_240520-t26_1-p1	transcript=TGGT1_240520-t26_1 | gene=TGGT1_240520 | organism=Toxoplasma_gondii_GT1 | gene_product=hypothetical protein | transcript_product=hypothetical protein | location=TGGT1_chrVI:1274924-1276276(+) | protein_length=399 | sequence_SO=chromosome | SO=protein_coding_gene | is_pseudo=false	0.001	4.534	4	1	2	1	399	44.4	8.35	4.68	1	1.557	1.649	1.335	1.116	0.993	0.664	0.517	0.559	0.527	34.1	53.1	56.2	45.6	38.1	33.9	22.6	17.6	19.1	18	High	High	High	High	High	High	High	High	High	High	1
4.1228e+18	FALSE	Medium	IsMasterProtein	TGGT1_299030-t26_1-p1	transcript=TGGT1_299030-t26_1 | gene=TGGT1_299030 | organism=Toxoplasma_gondii_GT1 | gene_product=RRM_2 domain-containing protein [Source:UniProtKB/TrEMBL;Acc:S7VV91] | transcript_product=RNA recognition motif 2 protein | location=TGGT1_chrIII:2217648-2220571(+) | protein_length=429 | sequence_SO=chromosome | SO=protein_coding_gene | is_pseudo=false	0.017	1.966	2	1	1	1	429	46.1	6.54	2.4	1	1.244	1.27	0.908	0.717	0.644	0.495	0.515	0.465	0.411	34.3	42.7	43.6	31.2	24.6	22.1	17	17.7	15.9	14.1	High	High	High	High	High	High	High	High	High	High	1
-8.74351e+18	FALSE	High	IsMasterProtein	TGGT1_316230-t26_1-p1	transcript=TGGT1_316230-t26_1 | gene=TGGT1_316230 | organism=Toxoplasma_gondii_GT1 | gene_product=SAC domain-containing protein [Source:UniProtKB/TrEMBL;Acc:S7W181] | transcript_product=putative SAC1 phosphoinositide phosphatase | location=TGGT1_chrXI:5135506-5143895(-) | protein_length=1000 | sequence_SO=chromosome | SO=protein_coding_gene | is_pseudo=false	0	11.381	3	1	1	1	1000	108.3	8.29	6.93	1	1.444	1.638	1.139	1.291	0.95	0.808	0.725	0.735	0.695	34.4	49.7	56.4	39.2	44.4	32.7	27.8	25	25.3	23.9	High	High	High	High	High	High	High	High	High	High	1
6.73255e+17	FALSE	High	IsMasterProtein	TGGT1_201250-t26_1-p1	transcript=TGGT1_201250-t26_1 | gene=TGGT1_201250 | organism=Toxoplasma_gondii_GT1 | gene_product=Putative histone lysine methyltransferase, SET [Source:UniProtKB/TrEMBL;Acc:S7UV73] | transcript_product=putative histone lysine methyltransferase, SET | location=TGGT1_chrVIIa:3839435-3846508(+) | protein_length=1635 | sequence_SO=chromosome | SO=protein_coding_gene | is_pseudo=false	0.001	4.701	1	1	1	1	1635	177.9	6.3	4.2	1	1.4	1.669	0.923	1.125	0.808	0.815	0.65	0.588	0.646	35	48.9	58.3	32.3	39.3	28.2	28.5	22.7	20.6	22.6	High	High	High	High	High	High	High	High	High	High	1
7.47316e+18	FALSE	High	IsMasterProtein	TGGT1_299168-t26_1-p1	transcript=TGGT1_299168-t26_1 | gene=TGGT1_299168 | organism=Toxoplasma_gondii_GT1 | gene_product=AAA domain-containing protein [Source:UniProtKB/TrEMBL;Acc:S7W298] | transcript_product=ATPase, AAA family protein | location=TGGT1_chrIII:2118555-2122018(-) | protein_length=423 | sequence_SO=chromosome | SO=protein_coding_gene | is_pseudo=false	0	8.84	4	1	1	1	423	45.5	5.82	5.38	1	1.188	1.5	1.207	1.389	0.816	0.661	0.715	0.591	0.645	35.3	41.9	52.9	42.6	49	28.8	23.3	25.2	20.8	22.8	High	High	High	High	High	High	High	High	High	High	1
-5.20833e+18	FALSE	High	IsMasterProtein	TGGT1_214870-t26_1-p1	transcript=TGGT1_214870-t26_1 | gene=TGGT1_214870 | organism=Toxoplasma_gondii_GT1 | gene_product=RIBOSOMAL_L9 domain-containing protein [Source:UniProtKB/TrEMBL;Acc:S7VZE4] | transcript_product=ribosomal protein L9, N-terminal domain-containing protein | location=TGGT1_chrX:6446776-6448774(+) | protein_length=491 | sequence_SO=chromosome | SO=protein_coding_gene | is_pseudo=false	0	9.882	7	2	4	2	491	53.8	8.84	14.58	2	1.242	1.709	0.985	1.156	1.035	0.81	0.863	0.76	0.765	35.4	43.9	60.5	34.9	40.9	36.6	28.6	30.5	26.9	27.1	High	High	High	High	High	High	High	High	High	High	1
6.09018e+18	FALSE	Medium	IsMasterProtein	TGGT1_276130-t26_1-p1	transcript=TGGT1_276130-t26_1 | gene=TGGT1_276130 | organism=Toxoplasma_gondii_GT1 | gene_product=Pept_C1 domain-containing protein [Source:UniProtKB/TrEMBL;Acc:S7UNK8] | transcript_product=cathepsin CPC2 | location=TGGT1_chrIII:114076-122551(-) | protein_length=753 | sequence_SO=chromosome | SO=protein_coding_gene | is_pseudo=false	0.036	1.492	2	1	1	1	753	83	5.62	1.79	1	1.125	1.313	0.917	1.087	0.863	0.98	0.651	0.625	0.886	35.5	39.9	46.6	32.5	38.6	30.6	34.8	23.1	22.2	31.4	High	High	High	High	High	High	High	High	High	High	1
7.36696e+18	FALSE	High	IsMasterProtein	TGGT1_246670-t26_1-p1	transcript=TGGT1_246670-t26_1 | gene=TGGT1_246670 | organism=Toxoplasma_gondii_GT1 | gene_product=hypothetical protein | transcript_product=hypothetical protein | location=TGGT1_chrXII:2851344-2853405(+) | protein_length=358 | sequence_SO=chromosome | SO=protein_coding_gene | is_pseudo=false	0	11.622	4	1	1	1	358	37.3	5.34	4.67	1	1.953	1.909	0.929	1.809	0.762	1.424	1.128	1.073	1.298	35.5	69.4	67.8	33	64.2	27.1	50.6	40.1	38.1	46.1	High	High	High	High	High	High	High	High	High	High	1
2.05001e+18	FALSE	High	IsMasterProtein	TGGT1_267750-t26_1-p1	transcript=TGGT1_267750-t26_1 | gene=TGGT1_267750 | organism=Toxoplasma_gondii_GT1 | gene_product=hypothetical protein | transcript_product=hypothetical protein | location=TGGT1_chrIX:218329-226396(+) | protein_length=1643 | sequence_SO=chromosome | SO=protein_coding_gene | is_pseudo=false	0.001	6.071	2	2	2	2	1643	175.2	8.22	4.86	2	1.613	1.281	1.103	1.14	0.674	0.648	0.678	0.568	0.46	35.6	57.4	45.6	39.3	40.6	24	23	24.1	20.2	16.4	High	High	High	High	High	High	High	High	High	High	1
5.2775e+16	FALSE	High	IsMasterProtein	TGGT1_285700-t26_1-p1	transcript=TGGT1_285700-t26_1 | gene=TGGT1_285700 | organism=Toxoplasma_gondii_GT1 | gene_product=Ubiquitin fusion degradation protein UFD1AP [Source:UniProtKB/TrEMBL;Acc:S7W333] | transcript_product=ubiquitin fusion degradation protein UFD1AP | location=TGGT1_chrV:2132793-2138253(-) | protein_length=732 | sequence_SO=chromosome | SO=protein_coding_gene | is_pseudo=false	0	7.142	3	2	3	2	732	80.5	8.57	8.38	2	1.682	1.509	0.872	1.465	0.736	0.592	0.421	0.709	0.583	35.7	60	53.8	31.1	52.3	26.3	21.1	15	25.3	20.8	High	High	High	High	High	High	High	High	High	High	1
4.38104e+18	FALSE	High	IsMasterProtein	TGGT1_241240-t26_1-p1	transcript=TGGT1_241240-t26_1 | gene=TGGT1_241240 | organism=Toxoplasma_gondii_GT1 | gene_product=hypothetical protein | transcript_product=hypothetical protein | location=TGGT1_chrVI:1657567-1659295(+) | protein_length=474 | sequence_SO=chromosome | SO=protein_coding_gene | is_pseudo=false	0	12.735	7	2	2	2	474	52.8	10.08	7.83	2	1.288	1.449	1.08	1.01	1.037	0.568	0.415	0.628	0.532	35.8	46.1	51.9	38.7	36.2	37.1	20.3	14.8	22.5	19	High	High	High	High	High	High	High	High	High	High	1
-4.03172e+18	FALSE	High	IsMasterProtein	TGGT1_315700-t26_1-p1	transcript=TGGT1_315700-t26_1 | gene=TGGT1_315700 | organism=Toxoplasma_gondii_GT1 | gene_product=GYF domain-containing protein [Source:UniProtKB/TrEMBL;Acc:S7UMB8] | transcript_product=hypothetical protein | location=TGGT1_chrXI:4854311-4859905(-) | protein_length=825 | sequence_SO=chromosome | SO=protein_coding_gene | is_pseudo=false	0	8.795	2	1	1	1	825	88	9.5	4.26	1	1.182	1.581	0.883	0.96	0.771	0.681	0.67	0.527	0.565	35.9	42.5	56.8	31.7	34.5	27.7	24.5	24.1	18.9	20.3	High	High	High	High	High	High	High	High	High	High	1
8.3061e+18	FALSE	High	IsMasterProtein	TGGT1_262390-t26_1-p1	transcript=TGGT1_262390-t26_1 | gene=TGGT1_262390 | organism=Toxoplasma_gondii_GT1 | gene_product=TLDc domain-containing protein [Source:UniProtKB/TrEMBL;Acc:S7UYB4] | transcript_product=TLD protein | location=TGGT1_chrVIIb:1280695-1289391(+) | protein_length=1392 | sequence_SO=chromosome | SO=protein_coding_gene | is_pseudo=false	0	17.244	3	3	4	3	1392	148	6.24	11.21	3	1.413	1.594	1.037	0.855	0.768	0.656	0.543	0.56	0.626	36.6	51.8	58.4	38	31.3	28.1	24	19.9	20.5	22.9	High	High	High	High	High	High	High	High	High	High	1
1.1555e+18	FALSE	High	IsMasterProtein	TGGT1_230340-t26_1-p1	transcript=TGGT1_230340-t26_1 | gene=TGGT1_230340 | organism=Toxoplasma_gondii_GT1 | gene_product=hypothetical protein | transcript_product=hypothetical protein | location=TGGT1_chrVIII:711206-715922(+) | protein_length=949 | sequence_SO=chromosome | SO=protein_coding_gene | is_pseudo=false	0	15.375	4	3	4	3	949	102.3	7.23	11.31	3	1.075	1.348	1.097	1.522	1.606	1.854	2.029	2.752	2.707	36.7	39.5	49.5	40.3	55.9	59	68.1	74.6	101.1	99.5	High	High	High	High	High	High	High	High	High	High	1
2.10214e+18	FALSE	High	IsMasterProtein	TGGT1_265990-t26_1-p1	transcript=TGGT1_265990-t26_1 | gene=TGGT1_265990 | organism=Toxoplasma_gondii_GT1 | gene_product=hypothetical protein | transcript_product=hypothetical protein | location=TGGT1_chrIX:1211362-1212602(-) | protein_length=231 | sequence_SO=chromosome | SO=protein_coding_gene | is_pseudo=false	0.005	3.174	3	1	1	1	231	25.7	9.8	2.51	1	1.093	1.475	0.883	1.148	0.974	0.572	0.629	0.705	0.765	36.9	40.3	54.4	32.6	42.3	35.9	21.1	23.2	26	28.2	High	High	High	High	High	High	High	High	High	High	1
2.10235e+18	FALSE	High	IsMasterProtein	TGGT1_236270-t26_1-p1	transcript=TGGT1_236270-t26_1 | gene=TGGT1_236270 | organism=Toxoplasma_gondii_GT1 | gene_product=RING-type domain-containing protein [Source:UniProtKB/TrEMBL;Acc:S7URM1] | transcript_product=hypothetical protein | location=TGGT1_chrX:5261682-5264457(+) | protein_length=384 | sequence_SO=chromosome | SO=protein_coding_gene | is_pseudo=false	0	12.498	12	2	3	2	384	39.8	5.96	11.28	2	1.309	1.597	1.203	1.078	1.047	1.013	1.025	1.078	1.225	37	48.5	59.2	44.5	39.9	38.8	37.5	38	39.9	45.4	High	High	High	High	High	High	High	High	High	High	1
-9.56067e+16	FALSE	Medium	IsMasterProtein	TGGT1_247290-t26_1-p1	transcript=TGGT1_247290-t26_1 | gene=TGGT1_247290 | organism=Toxoplasma_gondii_GT1 | gene_product=hypothetical protein | transcript_product=hypothetical protein | location=TGGT1_chrXII:3154693-3164074(+) | protein_length=2239 | sequence_SO=chromosome | SO=protein_coding_gene | is_pseudo=false	0.017	1.997	0	1	1	1	2239	238.3	8.69	2.2	1	1.344	1.294	1.159	1.001	0.841	0.655	0.587	0.709	0.556	37.1	49.8	48	43	37.1	31.2	24.3	21.8	26.3	20.6	High	High	High	High	High	High	High	High	High	High	1
-2.30779e+18	FALSE	Medium	IsMasterProtein	TGGT1_227800-t26_1-p1	transcript=TGGT1_227800-t26_1 | gene=TGGT1_227800 | organism=Toxoplasma_gondii_GT1 | gene_product=EF hand domain-containing protein [Source:UniProtKB/TrEMBL;Acc:S7UXC8] | transcript_product=EF hand domain-containing protein | location=TGGT1_chrX:720180-729168(-) | protein_length=1280 | sequence_SO=chromosome | SO=protein_coding_gene | is_pseudo=false	0.017	1.989	1	1	1	1	1280	135.8	6.04	2.04	1	1.188	1.375	0.786	1.013	0.945	0.769	0.507	0.407	0.474	37.2	44.1	51.1	29.2	37.6	35.1	28.6	18.8	15.1	17.6	High	High	High	High	High	High	High	High	High	High	1
8.48381e+18	FALSE	High	IsMasterProtein	TGGT1_253310-t26_1-p1	transcript=TGGT1_253310-t26_1 | gene=TGGT1_253310 | organism=Toxoplasma_gondii_GT1 | gene_product=hypothetical protein | transcript_product=hypothetical protein | location=TGGT1_chrIII:827087-832327(-) | protein_length=845 | sequence_SO=chromosome | SO=protein_coding_gene | is_pseudo=false	0.003	3.977	3	2	3	2	845	90.4	6.02	6.55	2	1.177	1.424	1.231	1.316	1.088	0.803	0.839	0.769	0.684	37.4	44	53.2	46	49.2	40.7	30	31.3	28.7	25.6	High	High	High	High	High	High	High	High	High	High	1
6.55588e+18	FALSE	Medium	IsMasterProtein	TGGT1_273360-t26_1-p1	transcript=TGGT1_273360-t26_1 | gene=TGGT1_273360 | organism=Toxoplasma_gondii_GT1 | gene_product=ABC transporter transmembrane region domain-containing protein [Source:UniProtKB/TrEMBL;Acc:S7V3D3] | transcript_product=ABC transporter transmembrane region domain-containing protein | location=TGGT1_chrVIII:3562100-3574403(-) | protein_length=1163 | sequence_SO=chromosome | SO=protein_coding_gene |…	0.012	2.266	1	1	1	1	1163	127.2	6.28	2.4	1	1.219	1.55	1.098	1.135	0.895	0.383	0.29	0.437	0.45	37.5	45.7	58.1	41.1	42.5	33.6	14.4	10.9	16.4	16.9	High	High	High	High	High	High	High	High	High	High	1
-1.83394e+18	FALSE	High	IsMasterProtein	TGGT1_257780-t26_1-p1	transcript=TGGT1_257780-t26_1 | gene=TGGT1_257780 | organism=Toxoplasma_gondii_GT1 | gene_product=hypothetical protein | transcript_product=hypothetical protein | location=TGGT1_chrVIIb:3753494-3759044(-) | protein_length=1698 | sequence_SO=chromosome | SO=protein_coding_gene | is_pseudo=false	0.001	4.728	1	2	2	2	1698	181.8	6.02	5.74	2	1.444	1.773	1.409	0.905	1.008	0.73	0.419	0.627	1.276	37.7	54.4	66.8	53.1	34.1	38	27.5	15.8	23.6	48.1	High	High	High	High	High	High	High	High	High	High	1
-3.26178e+18	FALSE	Medium	IsMasterProtein	TGGT1_264940-t26_1-p1	transcript=TGGT1_264940-t26_1 | gene=TGGT1_264940 | organism=Toxoplasma_gondii_GT1 | gene_product=Kelch repeat-containing protein [Source:UniProtKB/TrEMBL;Acc:S7VV31] | transcript_product=kelch repeat-containing protein | location=TGGT1_chrIX:1716679-1727049(+) | protein_length=2048 | sequence_SO=chromosome | SO=protein_coding_gene | is_pseudo=false	0.019	1.853	1	1	1	1	2048	215.7	5.99	2.42	1	1.119	1.513	1.15	1.088	1.006	0.731	0.906	0.653	0.617	37.7	42.2	57	43.3	41	37.9	27.6	34.1	24.6	23.3	High	High	High	High	High	High	High	High	High	High	1
-2.31575e+18	FALSE	Medium	IsMasterProtein	TGGT1_246910-t26_1-p1	transcript=TGGT1_246910-t26_1 | gene=TGGT1_246910 | organism=Toxoplasma_gondii_GT1 | gene_product=SET domain-containing protein [Source:UniProtKB/TrEMBL;Acc:S7V1B8] | transcript_product=putative histone lysine methyltransferase, SET | location=TGGT1_chrXII:2945069-2946688(-) | protein_length=539 | sequence_SO=chromosome | SO=protein_coding_gene | is_pseudo=false	0.011	2.315	2	1	2	1	539	59.2	5.24	2.98	1	1.004	1.078	1.001	0.735	0.82	0.68	0.595	0.523	0.533	38	38.2	41	38.1	27.9	31.2	25.9	22.6	19.9	20.3	High	High	High	High	High	High	High	High	High	High	1
8.22427e+18	FALSE	High	IsMasterProtein	TGGT1_268840-t26_1-p1	transcript=TGGT1_268840-t26_1 | gene=TGGT1_268840 | organism=Toxoplasma_gondii_GT1 | gene_product=Putative N6-adenosine-methyltransferase [Source:UniProtKB/TrEMBL;Acc:S7V4L7] | transcript_product=putative N6-adenosine-methyltransferase | location=TGGT1_chrVIII:6253001-6256297(-) | protein_length=525 | sequence_SO=chromosome | SO=protein_coding_gene | is_pseudo=false	0	7.993	4	1	3	1	525	57.8	6.44	9.98	1	1.25	1.137	0.82	0.757	0.448	0.27	0.239	0.332	0.224	38.3	47.8	43.5	31.4	29	17.2	10.3	9.1	12.7	8.6	High	High	High	High	High	High	High	High	High	High	1
-2.23537e+18	FALSE	Low	IsMasterProtein	TGGT1_224760-t26_1-p1	transcript=TGGT1_224760-t26_1 | gene=TGGT1_224760 | organism=Toxoplasma_gondii_GT1 | gene_product=SAG-related sequence SRS40E [Source:UniProtKB/TrEMBL;Acc:S7W551] | transcript_product=SAG-related sequence SRS40E | location=TGGT1_chrX:2744239-2745429(-) | protein_length=396 | sequence_SO=chromosome | SO=protein_coding_gene | is_pseudo=false	0.053	1.271	2	1	1	1	396	42.1	7.44	2.06	1	0.898	1.056	0.701	1.005	0.766	0.748	0.516	0.751	0.612	38.9	34.9	41.1	27.3	39.1	29.8	29.1	20.1	29.2	23.8	High	High	High	High	High	High	High	High	High	High	1
6.20084e+17	FALSE	High	IsMasterProtein	TGGT1_221460-t26_1-p1	transcript=TGGT1_221460-t26_1 | gene=TGGT1_221460 | organism=Toxoplasma_gondii_GT1 | gene_product=Phosphoglycerate mutase family protein [Source:UniProtKB/TrEMBL;Acc:S7ULE8] | transcript_product=phosphoglycerate mutase family protein | location=TGGT1_chrII:349484-355588(+) | protein_length=450 | sequence_SO=chromosome | SO=protein_coding_gene | is_pseudo=false	0.001	4.703	3	1	1	1	450	48.4	7.11	4.01	1	1.288	1.493	0.971	1.236	0.997	0.781	0.797	0.706	0.687	39	50.2	58.2	37.8	48.2	38.9	30.4	31.1	27.5	26.8	High	High	High	High	High	High	High	High	High	High	1
-2.6948e+18	FALSE	High	IsMasterProtein	TGGT1_275840-t26_1-p1	transcript=TGGT1_275840-t26_1 | gene=TGGT1_275840 | organism=Toxoplasma_gondii_GT1 | gene_product=PPM-type phosphatase domain-containing protein [Source:UniProtKB/TrEMBL;Acc:S7UNL6] | transcript_product=protein phosphatase 2C domain-containing protein | location=TGGT1_chrIII:177308-186515(-) | protein_length=744 | sequence_SO=chromosome | SO=protein_coding_gene | is_pseudo=false	0.002	4.454	3	1	1	1	744	80.7	8.43	2.65	1	1.381	1.388	0.964	1.116	0.643	0.92	0.679	0.66	0.576	39	53.8	54.1	37.6	43.5	25.1	35.8	26.5	25.7	22.4	High	High	High	High	High	High	High	High	High	High	1
-1.01977e+17	FALSE	High	IsMasterProtein	TGGT1_320015-t26_1-p1	transcript=TGGT1_320015-t26_1 | gene=TGGT1_320015 | organism=Toxoplasma_gondii_GT1 | gene_product=hypothetical protein | transcript_product=hypothetical protein | location=TGGT1_chrIV:524070-526223(+) | protein_length=389 | sequence_SO=chromosome | SO=protein_coding_gene | is_pseudo=false	0.001	5.888	7	2	2	2	389	42.2	8.59	2.52	2	1.45	1.481	1.168	1.459	0.956	0.83	0.871	0.819	0.781	39.2	56.8	58	45.8	57.1	37.4	32.5	34.1	32.1	30.6	High	High	High	High	High	High	High	High	High	High	1
-1.97879e+18	FALSE	Medium	IsMasterProtein	TGGT1_243790-t26_1-p1	transcript=TGGT1_243790-t26_1 | gene=TGGT1_243790 | organism=Toxoplasma_gondii_GT1 | gene_product=SAG-related sequence SRS33 [Source:UniProtKB/TrEMBL;Acc:S7VN60] | transcript_product=SAG-related sequence SRS33 | location=TGGT1_chrVI:2773368-2774249(-) | protein_length=293 | sequence_SO=chromosome | SO=protein_coding_gene | is_pseudo=false	0.028	1.677	7	1	1	1	293	31.8	9.88	2.28	1	1.044	1.187	1.057	0.924	0.758	0.628	0.418	0.542	0.359	39.2	40.9	46.5	41.4	36.2	29.7	24.6	16.4	21.2	14.1	High	High	High	High	High	High	High	High	High	High	1
-7.46556e+18	FALSE	High	IsMasterProtein	TGGT1_291120-t26_1-p1	transcript=TGGT1_291120-t26_1 | gene=TGGT1_291120 | organism=Toxoplasma_gondii_GT1 | gene_product=Trafficking protein mon1 subfamily protein [Source:UniProtKB/TrEMBL;Acc:S7W4I0] | transcript_product=trafficking protein mon1 subfamily protein | location=TGGT1_chrIX:3938096-3949369(+) | protein_length=1086 | sequence_SO=chromosome | SO=protein_coding_gene | is_pseudo=false	0	8.71	2	1	1	1	1086	116.4	5.41	5	1	1.45	1.469	0.917	0.938	0.818	0.501	0.515	0.425	0.48	39.2	56.8	57.5	35.9	36.8	32	19.6	20.2	16.6	18.8	High	High	High	High	High	High	High	High	High	High	1
5.76015e+18	FALSE	High	IsMasterProtein	TGGT1_293220-t26_1-p1	transcript=TGGT1_293220-t26_1 | gene=TGGT1_293220 | organism=Toxoplasma_gondii_GT1 | gene_product=DHHC domain-containing protein [Source:UniProtKB/TrEMBL;Acc:S7VRH5] | transcript_product=DHHC zinc finger domain-containing protein | location=TGGT1_chrIa:151541-159618(+) | protein_length=1327 | sequence_SO=chromosome | SO=protein_coding_gene | is_pseudo=false	0.001	6.554	1	1	1	1	1327	146.3	8	4.68	1	1.231	1.2	0.973	1.064	0.802	0.585	0.57	0.493	0.387	39.2	48.2	47	38.1	41.7	31.4	22.9	22.3	19.3	15.1	High	High	High	High	High	High	High	High	High	High	1
-5.37628e+18	FALSE	High	IsMasterProtein	TGGT1_221940-t26_1-p1	transcript=TGGT1_221940-t26_1 | gene=TGGT1_221940 | organism=Toxoplasma_gondii_GT1 | gene_product=Adaptin_N domain-containing protein [Source:UniProtKB/TrEMBL;Acc:S7VU32] | transcript_product=adaptin n terminal region domain-containing protein | location=TGGT1_chrII:689725-699521(-) | protein_length=1348 | sequence_SO=chromosome | SO=protein_coding_gene | is_pseudo=false	0.001	5.626	2	2	2	2	1348	147.4	8.31	5.86	2	1.292	1.003	1.01	0.751	0.508	0.181	0.227	0.332	0.292	39.2	50.7	39.3	39.6	29.5	19.9	7.1	8.9	13	11.5	High	High	High	High	High	High	High	High	High	High	1
-3.47659e+18	FALSE	Medium	IsMasterProtein	TGGT1_264140-t26_1-p1	transcript=TGGT1_264140-t26_1 | gene=TGGT1_264140 | organism=Toxoplasma_gondii_GT1 | gene_product=hypothetical protein | transcript_product=hypothetical protein | location=TGGT1_chrVIIb:110564-129976(-) | protein_length=6086 | sequence_SO=chromosome | SO=protein_coding_gene | is_pseudo=false	0.029	1.605	0	1	1	1	6086	653.1	8.57	2.15	1	1.081	1.185	1.074	0.728	0.987	0.658	0.592	0.598	0.491	39.8	43	47.2	42.8	29	39.3	26.2	23.6	23.8	19.6	High	High	High	High	High	High	High	High	High	High	1
-6.41718e+18	FALSE	High	IsMasterProtein	TGGT1_278740-t26_1-p1	transcript=TGGT1_278740-t26_1 | gene=TGGT1_278740 | organism=Toxoplasma_gondii_GT1 | gene_product=Diaminopimelate decarboxylase [Source:UniProtKB/TrEMBL;Acc:S7W8B6] | transcript_product=diaminopimelate decarboxylase | location=TGGT1_chrXII:5822054-5825645(-) | protein_length=686 | sequence_SO=chromosome | SO=protein_coding_gene | is_pseudo=false	0	12.627	5	2	2	2	686	75.7	6.93	7.33	2	1.276	1.335	0.913	1.028	0.729	0.541	0.494	0.4	0.424	40	51	53.4	36.5	41.1	29.1	21.6	19.7	16	17	High	High	High	High	High	High	High	High	High	High	1
-8.84835e+17	FALSE	High	IsMasterProtein	TGGT1_283520-t26_1-p1	transcript=TGGT1_283520-t26_1 | gene=TGGT1_283520 | organism=Toxoplasma_gondii_GT1 | gene_product=hypothetical protein | transcript_product=hypothetical protein | location=TGGT1_chrV:2933572-2940120(-) | protein_length=2182 | sequence_SO=chromosome | SO=protein_coding_gene | is_pseudo=false	0.001	5.726	1	1	2	1	2182	233.6	8.19	6.84	1	1.427	1.511	0.888	1.435	0.733	0.607	0.509	0.761	0.705	40.1	57.3	60.6	35.6	57.6	29.4	24.4	20.4	30.5	28.3	High	High	High	High	High	High	High	High	High	High	1
5.58279e+18	FALSE	High	IsMasterProtein	TGGT1_315470-t26_1-p1	transcript=TGGT1_315470-t26_1 | gene=TGGT1_315470 | organism=Toxoplasma_gondii_GT1 | gene_product=hypothetical protein | transcript_product=hypothetical protein | location=TGGT1_chrXI:4680568-4685273(-) | protein_length=1278 | sequence_SO=chromosome | SO=protein_coding_gene | is_pseudo=false	0.007	2.72	1	1	1	1	1278	135.7	8.07	2.48	1	1.119	1.488	1.038	1.127	1.162	1.057	0.873	1.113	1.066	40.2	45	59.8	41.8	45.3	46.7	42.5	35.1	44.8	42.9	High	High	High	High	High	High	High	High	High	High	1
-4.35465e+18	FALSE	High	IsMasterProtein	TGGT1_232550-t26_1-p1	transcript=TGGT1_232550-t26_1 | gene=TGGT1_232550 | organism=Toxoplasma_gondii_GT1 | gene_product=hypothetical protein | transcript_product=hypothetical protein | location=TGGT1_chrVIII:2153593-2154710(+) | protein_length=227 | sequence_SO=chromosome | SO=protein_coding_gene | is_pseudo=false	0.001	5.981	13	2	2	2	227	24.7	5.12	6.63	2	1.25	1.396	1.167	1.329	1.038	0.748	0.832	0.9	0.746	40.3	50.4	56.3	47.1	53.6	41.9	30.2	33.6	36.3	30.1	High	High	High	High	High	High	High	High	High	High	1
-5.12382e+18	FALSE	Medium	IsMasterProtein	TGGT1_260620-t26_1-p1	transcript=TGGT1_260620-t26_1 | gene=TGGT1_260620 | organism=Toxoplasma_gondii_GT1 | gene_product=hypothetical protein | transcript_product=hypothetical protein | location=TGGT1_chrVIIb:2092458-2093165(-) | protein_length=115 | sequence_SO=chromosome | SO=protein_coding_gene | is_pseudo=false	0.011	2.355	10	1	1	1	115	11.5	4.78	2.62	1	1.069	1.288	0.988	0.994	0.991	0.729	0.7	0.744	0.909	40.3	43.1	51.9	39.9	40.1	40	29.4	28.2	30	36.7	High	High	High	High	High	High	High	High	High	High	1
-7.66963e+18	FALSE	High	IsMasterProtein	TGGT1_243290-t26_1-p1	transcript=TGGT1_243290-t26_1 | gene=TGGT1_243290 | organism=Toxoplasma_gondii_GT1 | gene_product=hypothetical protein | transcript_product=hypothetical protein | location=TGGT1_chrVI:2431106-2433804(-) | protein_length=633 | sequence_SO=chromosome | SO=protein_coding_gene | is_pseudo=false	0.001	4.565	3	1	1	1	633	68.8	8.4	2.33	1	1.331	1.575	0.95	0.91	0.946	0.995	0.657	0.683	0.573	40.4	53.8	63.7	38.4	36.8	38.3	40.2	26.6	27.6	23.2	High	High	High	High	High	High	High	High	High	High	1
-5.51904e+18	FALSE	High	IsMasterProtein	TGGT1_242090-t26_1-p1	transcript=TGGT1_242090-t26_1 | gene=TGGT1_242090 | organism=Toxoplasma_gondii_GT1 | gene_product=Zinc finger (CCCH type) motif-containing protein [Source:UniProtKB/TrEMBL;Acc:S7US98] | transcript_product=zinc finger (CCCH type) motif-containing protein | location=TGGT1_chrVI:1823873-1827103(+) | protein_length=852 | sequence_SO=chromosome | SO=protein_coding_gene | is_pseudo=false	0.001	6.894	3	2	3	2	852	89.9	6.06	4.93	2	1.356	1.469	1.294	1.07	1.28	0.809	0.994	0.99	1.02	40.6	55	59.6	52.5	43.4	51.9	32.8	40.3	40.2	41.3	High	High	High	High	High	High	High	High	High	High	1
-4.31621e+18	FALSE	High	IsMasterProtein	TGGT1_207080-t26_1-p1	transcript=TGGT1_207080-t26_1 | gene=TGGT1_207080 | organism=Toxoplasma_gondii_GT1 | gene_product=Histone acetyltransferase [Source:UniProtKB/TrEMBL;Acc:S7UQJ2] | transcript_product=histone lysine acetyltransferase MYST-B | location=TGGT1_chrX:7247562-7254295(+) | protein_length=1087 | sequence_SO=chromosome | SO=protein_coding_gene | is_pseudo=false	0	8.388	2	1	2	1	1087	121	8.62	4.29	1	1.463	1.513	1.063	1.188	0.676	1.039	0.735	0.7	0.644	40.8	59.6	61.7	43.3	48.4	27.6	42.4	30	28.5	26.3	High	High	High	High	High	High	High	High	High	High	1
-5.15559e+18	FALSE	Medium	IsMasterProtein	TGGT1_309390-t26_1-p1	transcript=TGGT1_309390-t26_1 | gene=TGGT1_309390 | organism=Toxoplasma_gondii_GT1 | gene_product=hypothetical protein | transcript_product=hypothetical protein | location=TGGT1_chrXI:623150-625134(+) | protein_length=493 | sequence_SO=chromosome | SO=protein_coding_gene | is_pseudo=false	0.012	2.234	3	1	1	1	493	54.2	8.44	3.09	1	1.622	2.079	1.005	1.365	1.147	0.703	0.5	0.508	0.464	41	66.5	85.2	41.2	56	47	28.8	20.5	20.8	19	High	High	High	High	High	High	High	High	High	High	1
3.11077e+18	FALSE	High	IsMasterProtein	TGGT1_278390-t26_1-p1	transcript=TGGT1_278390-t26_1 | gene=TGGT1_278390 | organism=Toxoplasma_gondii_GT1 | gene_product=Toxoplasma gondii family A protein [Source:UniProtKB/TrEMBL;Acc:S7UZS7] | transcript_product=Toxoplasma gondii family A protein | location=TGGT1_chrXII:6039146-6040261(-) | protein_length=371 | sequence_SO=chromosome | SO=protein_coding_gene | is_pseudo=false	0	50.786	24	6	14	2	371	38.8	4.49	56.96	6	1.208	1.61	1.244	1.37	1.173	1.325	1.02	1.057	1.386	41.1	49.6	66.1	51.1	56.3	48.2	54.4	41.9	43.4	56.9	High	High	High	High	High	High	High	High	High	High	1
4.41568e+18	FALSE	High	IsMasterProtein	TGGT1_204390-t26_1-p1	transcript=TGGT1_204390-t26_1 | gene=TGGT1_204390 | organism=Toxoplasma_gondii_GT1 | gene_product=hypothetical protein | transcript_product=hypothetical protein | location=TGGT1_chrVIIa:1728571-1730153(+) | protein_length=375 | sequence_SO=chromosome | SO=protein_coding_gene | is_pseudo=false	0.001	5.207	5	2	2	2	375	40.1	8.82	4.09	2	1.331	1.425	0.976	0.934	0.723	0.689	0.408	0.427	0.459	41.2	54.8	58.7	40.2	38.5	29.8	28.4	16.8	17.6	18.9	High	High	High	High	High	High	High	High	High	High	1
-9.17036e+18	FALSE	High	IsMasterProtein	TGGT1_309920-t26_1-p1	transcript=TGGT1_309920-t26_1 | gene=TGGT1_309920 | organism=Toxoplasma_gondii_GT1 | gene_product=hypothetical protein | transcript_product=hypothetical protein | location=TGGT1_chrXI:864279-869407(+) | protein_length=893 | sequence_SO=chromosome | SO=protein_coding_gene | is_pseudo=false	0.003	3.419	1	1	1	1	893	94.1	8.32	2.8	1	1.162	1.406	0.833	1.031	0.778	0.594	0.522	0.58	0.535	41.6	48.3	58.5	34.6	42.9	32.4	24.7	21.7	24.1	22.3	High	High	High	High	High	High	High	High	High	High	1
-1.04741e+17	FALSE	High	IsMasterProtein	TGGT1_261260A-t26_1-p1	transcript=TGGT1_261260A-t26_1 | gene=TGGT1_261260A | organism=Toxoplasma_gondii_GT1 | gene_product=JmjC domain-containing protein [Source:UniProtKB/TrEMBL;Acc:S7WEE9] | transcript_product=histone lysine demethylase JMJD6a | location=TGGT1_chrVIIb:1769864-1774963(-) | protein_length=395 | sequence_SO=chromosome | SO=protein_coding_gene | is_pseudo=false	0.001	5.18	3	1	1	1	395	45.6	8.88	2.7	1	1.413	1.394	1.027	0.996	0.703	0.706	0.647	0.343	0.492	41.8	59.1	58.3	42.9	41.7	29.4	29.5	27.1	14.4	20.6	High	High	High	High	High	High	High	High	High	High	1
3.91336e+18	FALSE	High	IsMasterProtein	TGGT1_311320-t26_1-p1	transcript=TGGT1_311320-t26_1 | gene=TGGT1_311320 | organism=Toxoplasma_gondii_GT1 | gene_product=hypothetical protein | transcript_product=hypothetical protein | location=TGGT1_chrXI:1936967-1939312(+) | protein_length=176 | sequence_SO=chromosome | SO=protein_coding_gene | is_pseudo=false	0.001	5.391	8	1	1	1	176	20.2	8.28	3.66	1	1.088	1.463	0.954	1.154	1.058	0.668	0.696	0.718	0.671	42	45.7	61.5	40.1	48.5	44.5	28.1	29.3	30.2	28.2	High	High	High	High	High	High	High	High	High	High	1
6.68419e+18	FALSE	High	IsMasterProtein	TGGT1_278890-t26_1-p1	transcript=TGGT1_278890-t26_1 | gene=TGGT1_278890 | organism=Toxoplasma_gondii_GT1 | gene_product=CASP_C domain-containing protein [Source:UniProtKB/TrEMBL;Acc:S7WFM4] | transcript_product=hypothetical protein | location=TGGT1_chrXII:5691113-5698851(+) | protein_length=1101 | sequence_SO=chromosome | SO=protein_coding_gene | is_pseudo=false	0	11.307	2	1	3	1	1101	119.2	6.15	16.44	1	1.147	1.279	0.92	1.132	0.956	0.876	0.612	0.631	0.623	42.2	48.4	53.9	38.8	47.7	40.3	36.9	25.8	26.6	26.3	High	High	High	High	High	High	High	High	High	High	1
-1.33255e+18	FALSE	High	IsMasterProtein	TGGT1_229310-t26_1-p1	transcript=TGGT1_229310-t26_1 | gene=TGGT1_229310 | organism=Toxoplasma_gondii_GT1 | gene_product=Mediator of RNA polymerase II transcription subunit 14 [Source:UniProtKB/TrEMBL;Acc:S7V2L0] | transcript_product=mediator complex subunit MED14 | location=TGGT1_chrVIII:143392-161704(+) | protein_length=4345 | sequence_SO=chromosome | SO=protein_coding_gene | is_pseudo=false	0	7.13	1	2	2	2	4345	463.4	6.62	5.43	2	1.288	1.506	1.002	0.741	0.924	0.551	0.443	0.444	0.45	42.3	54.5	63.8	42.4	31.4	39.1	23.3	18.8	18.8	19.1	High	High	High	High	High	High	High	High	High	High	1
-2.25596e+18	FALSE	High	IsMasterProtein	TGGT1_243610-t26_1-p1	transcript=TGGT1_243610-t26_1 | gene=TGGT1_243610 | organism=Toxoplasma_gondii_GT1 | gene_product=C-5 cytosine-specific DNA methylase superfamily protein [Source:UniProtKB/TrEMBL;Acc:S7UEF7] | transcript_product=C-5 cytosine-specific DNA methylase superfamily protein | location=TGGT1_chrVI:2664010-2666755(+) | protein_length=883 | sequence_SO=chromosome | SO=protein_coding_gene | is_pseudo=false	0.006	2.773	1	1	1	1	883	96.8	8.37	2.43	1	1.39	1.513	1.328	1.308	1.089	0.823	0.798	0.823	0.584	42.8	59.5	64.7	56.8	56	46.6	35.2	34.1	35.2	25	High	High	High	High	High	High	High	High	High	High	1
5.08483e+18	FALSE	High	IsMasterProtein	TGGT1_266140-t26_1-p1	transcript=TGGT1_266140-t26_1 | gene=TGGT1_266140 | organism=Toxoplasma_gondii_GT1 | gene_product=Peptidase, M50 family protein [Source:UniProtKB/TrEMBL;Acc:A0A125YNX6] | transcript_product=peptidase, M50 family protein | location=TGGT1_chrIX:1094707-1101194(-) | protein_length=378 | sequence_SO=chromosome | SO=protein_coding_gene | is_pseudo=false	0.005	3.22	3	1	1	1	378	41.6	7.5	3.27	1	1.494	1.637	0.928	1.244	0.702	0.766	0.679	0.605	0.555	42.9	64	70.2	39.8	53.3	30.1	32.9	29.1	25.9	23.8	High	High	High	High	High	High	High	High	High	High	1
-5.97818e+18	FALSE	High	IsMasterProtein	TGGT1_243210-t26_1-p1	transcript=TGGT1_243210-t26_1 | gene=TGGT1_243210 | organism=Toxoplasma_gondii_GT1 | gene_product=DUF862 domain-containing protein [Source:UniProtKB/TrEMBL;Acc:S7URT5] | transcript_product=DUF862 domain-containing protein | location=TGGT1_chrVI:2363419-2368679(-) | protein_length=1093 | sequence_SO=chromosome | SO=protein_coding_gene | is_pseudo=false	0.001	5.329	2	2	2	2	1093	120	6.86	3.9	2	1.385	1.695	1.085	1.307	0.77	0.911	0.699	0.613	0.539	43	59.5	72.8	46.6	56.2	33.1	39.2	30	26.3	23.2	High	High	High	High	High	High	High	High	High	High	1
4.0271e+18	FALSE	High	IsMasterProtein	TGGT1_235905-t26_1-p1	transcript=TGGT1_235905-t26_1 | gene=TGGT1_235905 | organism=Toxoplasma_gondii_GT1 | gene_product=Lactamase_B domain-containing protein [Source:UniProtKB/TrEMBL;Acc:S7URN7] | transcript_product=putative ribonuclease z | location=TGGT1_chrX:5011602-5024262(+) | protein_length=1077 | sequence_SO=chromosome | SO=protein_coding_gene | is_pseudo=false	0.004	3.276	1	1	1	1	1077	116.7	6.62	2.41	1	0.972	0.924	0.933	0.62	0.724	0.411	0.346	0.401	0.28	43	41.8	39.8	40.1	26.7	31.2	17.7	14.9	17.2	12.1	High	High	High	High	High	High	High	High	High	High	1
5.1442e+18	FALSE	High	IsMasterProtein	TGGT1_261430-t26_1-p1	transcript=TGGT1_261430-t26_1 | gene=TGGT1_261430 | organism=Toxoplasma_gondii_GT1 | gene_product=hypothetical protein | transcript_product=hypothetical protein | location=TGGT1_chrVIIb:1731479-1735470(-) | protein_length=1072 | sequence_SO=chromosome | SO=protein_coding_gene | is_pseudo=false	0.006	2.897	1	1	1	1	1072	117.2	9.52	2.16	1	1.3	1.306	0.968	1.023	0.807	0.556	0.615	0.563	0.533	43.1	56	56.3	41.7	44.1	34.8	24	26.5	24.3	23	High	High	High	High	High	High	High	High	High	High	1
7.61596e+18	FALSE	High	IsMasterProtein	TGGT1_311040-t26_1-p1	transcript=TGGT1_311040-t26_1 | gene=TGGT1_311040 | organism=Toxoplasma_gondii_GT1 | gene_product=hypothetical protein | transcript_product=hypothetical protein | location=TGGT1_chrXI:1712492-1713547(+) | protein_length=351 | sequence_SO=chromosome | SO=protein_coding_gene | is_pseudo=false	0	8.111	7	2	3	2	351	38.1	6.54	4.83	2	1.544	1.829	0.968	1.403	0.791	1.38	1.391	1.298	1.353	43.1	66.5	78.8	41.7	60.4	34.1	59.5	60	56	58.3	High	High	High	High	High	High	High	High	High	High	1
7.53724e+18	FALSE	High	IsMasterProtein	TGGT1_264200-t26_1-p1	transcript=TGGT1_264200-t26_1 | gene=TGGT1_264200 | organism=Toxoplasma_gondii_GT1 | gene_product=Uroporphyrinogen-III synthase [Source:UniProtKB/TrEMBL;Acc:S7WDF8] | transcript_product=hypothetical protein | location=TGGT1_chrVIIb:56953-61319(-) | protein_length=1275 | sequence_SO=chromosome | SO=protein_coding_gene | is_pseudo=false	0.001	4.833	1	1	2	1	1275	137.7	7.58	6.13	1	1.366	1.676	1.248	1.086	0.996	0.71	0.601	0.734	0.603	43.3	59.1	72.6	54	47	43.1	30.7	26	31.8	26.1	High	High	High	High	High	High	High	High	High	High	1
5.75065e+18	FALSE	Medium	IsMasterProtein	TGGT1_271120-t26_1-p1	transcript=TGGT1_271120-t26_1 | gene=TGGT1_271120 | organism=Toxoplasma_gondii_GT1 | gene_product=Endo/exonuclease/phosphatase domain-containing protein [Source:UniProtKB/TrEMBL;Acc:S7WD41] | transcript_product=endonuclease/exonuclease/phosphatase family protein | location=TGGT1_chrVIII:4685606-4692063(-) | protein_length=1236 | sequence_SO=chromosome | SO=protein_coding_gene | is_pseudo=false	0.028	1.635	1	1	1	1	1236	132.6	5.5	1.61	1	1.344	1.621	1.083	1.469	0.97	0.645	0.71	0.865	0.663	43.3	58.2	70.2	46.9	63.6	42	27.9	30.8	37.5	28.7	High	High	High	High	High	High	High	High	High	High	1
-3.68264e+18	FALSE	High	IsMasterProtein	TGGT1_239610-t26_1-p1	transcript=TGGT1_239610-t26_1 | gene=TGGT1_239610 | organism=Toxoplasma_gondii_GT1 | gene_product=hypothetical protein | transcript_product=hypothetical protein | location=TGGT1_chrVI:792572-794410(+) | protein_length=612 | sequence_SO=chromosome | SO=protein_coding_gene | is_pseudo=false	0.006	2.887	2	1	1	1	612	65.6	8.02	2.76	1	1.6	1.413	1.401	1.399	0.937	0.639	0.48	0.665	0.454	43.3	69.3	61.2	60.7	60.6	40.5	27.7	20.8	28.8	19.7	High	High	High	High	High	High	High	High	High	High	1
3.06384e+18	FALSE	Medium	IsMasterProtein	TGGT1_213660-t26_1-p1	transcript=TGGT1_213660-t26_1 | gene=TGGT1_213660 | organism=Toxoplasma_gondii_GT1 | gene_product=Zinc finger (CCCH type) motif-containing protein [Source:UniProtKB/TrEMBL;Acc:S7UPG3] | transcript_product=zinc finger (CCCH type) motif-containing protein | location=TGGT1_chrV:1080657-1085300(-) | protein_length=1220 | sequence_SO=chromosome | SO=protein_coding_gene | is_pseudo=false	0.019	1.869	1	1	1	1	1220	129.8	5.9	2.12	1	1.081	1.174	1.112	0.707	0.675	0.504	0.357	0.556	0.344	43.7	47.2	51.3	48.6	30.9	29.5	22	15.6	24.3	15	High	High	High	High	High	High	High	High	High	High	1
-7.4809e+18	FALSE	High	IsMasterProtein	TGGT1_245485-t26_1-p1	transcript=TGGT1_245485-t26_1 | gene=TGGT1_245485 | organism=Toxoplasma_gondii_GT1 | gene_product=EGF-like domain-containing protein [Source:UniProtKB/TrEMBL;Acc:S7V1S7] | transcript_product=microneme protein MIC9 | location=TGGT1_chrXII:2239526-2240428(+) | protein_length=300 | sequence_SO=chromosome | SO=protein_coding_gene | is_pseudo=false	0.005	3.226	4	1	1	1	300	31.6	6.46	2.42	1	1.133	1.269	0.862	0.928	0.929	0.768	0.857	0.62	0.595	43.9	49.8	55.7	37.8	40.7	40.8	33.8	37.7	27.2	26.1	High	High	High	High	High	High	High	High	High	High	1
1.75631e+18	FALSE	High	IsMasterProtein	TGGT1_299080-t26_1-p1	transcript=TGGT1_299080-t26_1 | gene=TGGT1_299080 | organism=Toxoplasma_gondii_GT1 | gene_product=VTC domain-containing protein [Source:UniProtKB/TrEMBL;Acc:S7VV85] | transcript_product=VTC domain-containing protein | location=TGGT1_chrIII:2173714-2186038(+) | protein_length=1230 | sequence_SO=chromosome | SO=protein_coding_gene | is_pseudo=false	0.001	4.798	1	1	4	1	1230	138.5	6.68	8.97	1	1.461	1.668	1.112	1.148	0.843	0.43	0.399	0.44	0.295	43.9	64.2	73.3	48.8	50.4	37.1	18.9	17.5	19.3	13	High	High	High	High	High	High	High	High	High	High	1
-5.0524e+18	FALSE	Medium	IsMasterProtein	TGGT1_286740-t26_1-p1	transcript=TGGT1_286740-t26_1 | gene=TGGT1_286740 | organism=Toxoplasma_gondii_GT1 | gene_product=Microneme-like protein [Source:UniProtKB/TrEMBL;Acc:S7W387] | transcript_product=microneme-like protein | location=TGGT1_chrV:1554594-1556873(+) | protein_length=759 | sequence_SO=chromosome | SO=protein_coding_gene | is_pseudo=false	0.013	2.065	1	1	1	1	759	79.7	5.08	1.88	1	1.144	1.4	0.901	1.032	0.866	0.823	0.644	0.682	0.574	44.1	50.5	61.8	39.8	45.5	38.2	36.3	28.4	30.1	25.3	High	High	High	High	High	High	High	High	High	High	1
2.10195e+18	FALSE	High	IsMasterProtein	TGGT1_262130-t26_1-p1	transcript=TGGT1_262130-t26_1 | gene=TGGT1_262130 | organism=Toxoplasma_gondii_GT1 | gene_product=hypothetical protein | transcript_product=hypothetical protein | location=TGGT1_chrVIIb:1327288-1332580(-) | protein_length=782 | sequence_SO=chromosome | SO=protein_coding_gene | is_pseudo=false	0.006	2.772	1	1	2	1	782	87.8	4.74	4.49	1	1.605	1.16	1.251	1.164	1.109	0.851	0.74	1.056	0.976	44.1	70.9	51.2	55.2	51.4	49	37.5	32.7	46.6	43.1	High	High	High	High	High	High	High	High	High	High	1
6.47684e+18	FALSE	High	IsMasterProtein	TGGT1_233710-t26_1-p1	transcript=TGGT1_233710-t26_1 | gene=TGGT1_233710 | organism=Toxoplasma_gondii_GT1 | gene_product=Inorganic anion transporter, sulfate permease (SulP) family protein [Source:UniProtKB/TrEMBL;Acc:S7V3U4] | transcript_product=inorganic anion transporter, sulfate permease (SulP) family protein | location=TGGT1_chrVIII:2731831-2741058(+) | protein_length=1490 | sequence_SO=chromosome | SO=protein_cod…	0.003	3.455	1	1	1	1	1490	158.6	8.22	2.43	1	1.4	1.575	1.109	1.479	1.072	0.94	0.976	0.802	0.896	44.4	62.1	69.9	49.2	65.6	47.6	41.7	43.3	35.6	39.8	High	High	High	High	High	High	High	High	High	High	1
-2.57152e+18	FALSE	Medium	IsMasterProtein	TGGT1_271470-t26_1-p1	transcript=TGGT1_271470-t26_1 | gene=TGGT1_271470 | organism=Toxoplasma_gondii_GT1 | gene_product=hypothetical protein | transcript_product=hypothetical protein | location=TGGT1_chrVIII:4454119-4466187(-) | protein_length=2399 | sequence_SO=chromosome | SO=protein_coding_gene | is_pseudo=false	0.017	1.975	0	1	1	1	2399	260.8	6.54	1.93	1	1.119	0.921	0.762	0.509	0.407	0.226	0.319	0.286	0.265	44.5	49.8	41	33.9	22.7	18.1	10.1	14.2	12.7	11.8	High	High	High	High	High	High	High	High	High	High	1
8.59647e+18	FALSE	High	IsMasterProtein	TGGT1_215700-t26_1-p1	transcript=TGGT1_215700-t26_1 | gene=TGGT1_215700 | organism=Toxoplasma_gondii_GT1 | gene_product=Phosphatidylinositol 3-and 4-kinase [Source:UniProtKB/TrEMBL;Acc:S7W5A1] | transcript_product=phosphatidylinositol 3- and 4-kinase | location=TGGT1_chrX:6992178-7006444(-) | protein_length=2981 | sequence_SO=chromosome | SO=protein_coding_gene | is_pseudo=false	0.007	2.612	1	2	2	1	2981	317.1	6.48	3.66	2	0.96	0.992	0.894	0.784	0.745	0.478	0.375	0.557	0.488	45.1	43.2	44.7	40.3	35.3	33.6	21.5	16.9	25.1	22	High	High	High	High	High	High	High	High	High	High	1
2.41809e+18	FALSE	High	IsMasterProtein	TGGT1_245550-t26_1-p1	transcript=TGGT1_245550-t26_1 | gene=TGGT1_245550 | organism=Toxoplasma_gondii_GT1 | gene_product=hypothetical protein | transcript_product=hypothetical protein | location=TGGT1_chrXII:2300568-2301146(-) | protein_length=192 | sequence_SO=chromosome | SO=protein_coding_gene | is_pseudo=false	0.005	3.197	14	1	2	1	192	20.5	8	7.37	1	1.285	1.247	1.04	1.079	0.8	0.723	0.643	0.694	0.468	45.3	58.2	56.5	47.1	48.8	36.2	32.7	29.1	31.4	21.2	High	High	High	High	High	High	High	High	High	High	1
1.31827e+18	FALSE	Medium	IsMasterProtein	TGGT1_311020-t26_1-p1	transcript=TGGT1_311020-t26_1 | gene=TGGT1_311020 | organism=Toxoplasma_gondii_GT1 | gene_product=hypothetical protein | transcript_product=hypothetical protein | location=TGGT1_chrXI:1689881-1691118(+) | protein_length=307 | sequence_SO=chromosome | SO=protein_coding_gene | is_pseudo=false	0.019	1.856	3	1	1	1	307	33.1	9.28	2.03	1	1.238	1.731	1.015	1.278	1.074	0.824	0.701	0.768	0.707	45.3	56.1	78.4	46	57.9	48.6	37.3	31.8	34.8	32	High	High	High	High	High	High	High	High	High	High	1
3.60056e+18	FALSE	High	IsMasterProtein	TGGT1_214230-t26_1-p1	transcript=TGGT1_214230-t26_1 | gene=TGGT1_214230 | organism=Toxoplasma_gondii_GT1 | gene_product=Dopey_N domain-containing protein [Source:UniProtKB/TrEMBL;Acc:S7W5K2] | transcript_product=Dopey, N-terminal domain-containing protein | location=TGGT1_chrX:6016084-6037423(+) | protein_length=3100 | sequence_SO=chromosome | SO=protein_coding_gene | is_pseudo=false	0.001	6.408	1	2	2	2	3100	332.7	6.46	6.53	2	1.363	1.431	0.959	1.076	0.856	0.579	0.523	0.55	0.517	45.5	62	65.1	43.7	49	38.9	26.3	23.8	25	23.5	High	High	High	High	High	High	High	High	High	High	1
1.77835e+17	FALSE	Low	IsMasterProtein	TGGT1_223580-t26_1-p1	transcript=TGGT1_223580-t26_1 | gene=TGGT1_223580 | organism=Toxoplasma_gondii_GT1 | gene_product=Mediator complex subunit MED4 [Source:UniProtKB/TrEMBL;Acc:S7UVY7] | transcript_product=mediator complex subunit MED4 | location=TGGT1_chrX:3628884-3633071(+) | protein_length=519 | sequence_SO=chromosome | SO=protein_coding_gene | is_pseudo=false	0.068	1.121	2	1	1	1	519	55.7	7.34	0	1	1.156	1.694	1.059	1.096	0.937	0.729	0.712	0.563	0.53	45.5	52.6	77.1	48.2	49.9	42.7	33.2	32.4	25.6	24.1	High	High	High	High	High	High	High	High	High	High	1
-1.50762e+18	FALSE	Medium	IsMasterProtein	TGGT1_312700-t26_1-p1	transcript=TGGT1_312700-t26_1 | gene=TGGT1_312700 | organism=Toxoplasma_gondii_GT1 | gene_product=hypothetical protein | transcript_product=hypothetical protein | location=TGGT1_chrXI:2873744-2886278(+) | protein_length=2967 | sequence_SO=chromosome | SO=protein_coding_gene | is_pseudo=false	0.047	1.32	0	1	1	1	2967	321.7	8.37	0	1	1.031	1.269	1.124	0.733	1.328	0.489	0.491	0.599	0.621	45.7	47.2	58	51.4	33.5	60.7	22.4	22.5	27.4	28.4	High	High	High	High	High	High	High	High	High	High	1
-7.24865e+18	FALSE	Low	IsMasterProtein	TGGT1_280660-t26_1-p1	transcript=TGGT1_280660-t26_1 | gene=TGGT1_280660 | organism=Toxoplasma_gondii_GT1 | gene_product=HECT domain-containing protein [Source:UniProtKB/TrEMBL;Acc:S7UUN0] | transcript_product=HECT-domain (ubiquitin-transferase) domain-containing protein | location=TGGT1_chrVIIa:173679-235804(-) | protein_length=17226 | sequence_SO=chromosome | SO=protein_coding_gene | is_pseudo=false	0.053	1.268	0	1	1	1	17226	1853.3	7.33	1.89	1	1.375	1.375	1.302	1.153	0.978	0.908	0.825	0.933	1.15	45.8	63	63	59.7	52.9	44.8	41.6	37.8	42.7	52.7	High	High	High	High	High	High	High	High	High	High	1
4.27418e+18	FALSE	High	IsMasterProtein	TGGT1_315810-t26_1-p1	transcript=TGGT1_315810-t26_1 | gene=TGGT1_315810 | organism=Toxoplasma_gondii_GT1 | gene_product=PolyA_pol domain-containing protein [Source:UniProtKB/TrEMBL;Acc:S7VUV9] | transcript_product=tRNA nucleotidyltransferase/poly(A) polymerase family protein | location=TGGT1_chrXI:4947054-4952786(-) | protein_length=1123 | sequence_SO=chromosome | SO=protein_coding_gene | is_pseudo=false	0.001	6.073	2	1	2	1	1123	123.3	8.54	8.91	1	1.127	1.035	0.762	0.788	0.599	0.451	0.447	0.445	0.345	46	51.9	47.6	35.1	36.3	27.6	20.7	20.6	20.5	15.9	High	High	High	High	High	High	High	High	High	High	1
-1.72505e+18	FALSE	High	IsMasterProtein	TGGT1_277840-t26_1-p1	transcript=TGGT1_277840-t26_1 | gene=TGGT1_277840 | organism=Toxoplasma_gondii_GT1 | gene_product=Ras family protein [Source:UniProtKB/TrEMBL;Acc:A0A125YQY5] | transcript_product=Ras family protein | location=TGGT1_chrXII:6397828-6402631(-) | protein_length=257 | sequence_SO=chromosome | SO=protein_coding_gene | is_pseudo=false	0	8.28	10	2	2	2	257	29	5.76	6.83	2	1.442	1.681	0.826	1.022	0.734	0.465	0.315	0.422	0.376	46	66.4	77.4	38	47.1	33.8	21.4	14.5	19.4	17.3	High	High	High	High	High	High	High	High	High	High	1
8.35045e+18	FALSE	High	IsMasterProtein	TGGT1_300330-t26_1-p1	transcript=TGGT1_300330-t26_1 | gene=TGGT1_300330 | organism=Toxoplasma_gondii_GT1 | gene_product=hypothetical protein | transcript_product=hypothetical protein | location=TGGT1_chrXII:36167-42508(+) | protein_length=1284 | sequence_SO=chromosome | SO=protein_coding_gene | is_pseudo=false	0	13.541	3	2	3	2	1284	139.8	5.36	11.82	2	1.243	1.1	0.924	0.869	0.602	0.369	0.305	0.416	0.338	46.4	57.7	51	42.9	40.3	27.9	17.1	14.2	19.3	15.7	High	High	High	High	High	High	High	High	High	High	1
-8.906e+18	FALSE	High	IsMasterProtein	TGGT1_247730-t26_1-p1	transcript=TGGT1_247730-t26_1 | gene=TGGT1_247730 | organism=Toxoplasma_gondii_GT1 | gene_product=AP2 domain transcription factor AP2XII-5 [Source:UniProtKB/TrEMBL;Acc:S7V143] | transcript_product=AP2 domain transcription factor AP2XII-5 | location=TGGT1_chrXII:3468697-3473688(-) | protein_length=1502 | sequence_SO=chromosome | SO=protein_coding_gene | is_pseudo=false	0.001	5.83	1	2	2	2	1502	161.6	5.85	4.41	2	1.42	1.369	1.047	1.109	0.832	0.652	0.516	0.635	0.584	46.6	66.1	63.7	48.8	51.6	38.7	30.4	24	29.6	27.2	High	High	High	High	High	High	High	High	High	High	1
5.60956e+18	FALSE	High	IsMasterProtein	TGGT1_248980-t26_1-p1	transcript=TGGT1_248980-t26_1 | gene=TGGT1_248980 | organism=Toxoplasma_gondii_GT1 | gene_product=CS domain-containing protein [Source:UniProtKB/TrEMBL;Acc:S7W966] | transcript_product=NudC family protein | location=TGGT1_chrXII:4218148-4220480(+) | protein_length=384 | sequence_SO=chromosome | SO=protein_coding_gene | is_pseudo=false	0.005	3.109	3	1	2	1	384	42.5	6.39	4.78	1	1.19	1.238	0.931	0.918	0.99	0.672	0.63	0.747	0.747	46.7	55.5	57.8	43.5	42.9	46.2	31.4	29.4	34.9	34.9	High	High	High	High	High	High	High	High	High	High	1
9.69824e+17	FALSE	Medium	IsMasterProtein	TGGT1_263290-t26_1-p1	transcript=TGGT1_263290-t26_1 | gene=TGGT1_263290 | organism=Toxoplasma_gondii_GT1 | gene_product=RHOMBOID-like protein [Source:UniProtKB/TrEMBL;Acc:S7UXN0] | transcript_product=rhomboid protease ROM2 | location=TGGT1_chrVIIb:625248-629940(-) | protein_length=283 | sequence_SO=chromosome | SO=protein_coding_gene | is_pseudo=false	0.012	2.259	4	1	1	1	283	30.6	7.05	2.27	1	0.953	1.019	0.943	0.95	0.771	0.676	0.509	0.515	0.357	46.8	44.5	47.7	44.1	44.4	36	31.6	23.8	24.1	16.7	High	High	High	High	High	High	High	High	High	High	1
5.69268e+18	FALSE	Medium	IsMasterProtein	TGGT1_315300-t26_1-p1	transcript=TGGT1_315300-t26_1 | gene=TGGT1_315300 | organism=Toxoplasma_gondii_GT1 | gene_product=DUF667 domain-containing protein [Source:UniProtKB/TrEMBL;Acc:A0A125YSW5] | transcript_product=putative transcription factor IIB | location=TGGT1_chrXI:4583866-4586373(-) | protein_length=191 | sequence_SO=chromosome | SO=protein_coding_gene | is_pseudo=false	0.04	1.43	5	1	1	1	191	22.5	9.33	2.25	1	1.194	1.162	1.202	0.81	0.791	0.534	0.48	0.433	0.319	46.9	55.9	54.4	56.3	37.9	37.1	25	22.5	20.3	14.9	High	High	High	High	High	High	High	High	High	High	1
4.50871e+18	FALSE	High	IsMasterProtein	TGGT1_262520-t26_1-p1	transcript=TGGT1_262520-t26_1 | gene=TGGT1_262520 | organism=Toxoplasma_gondii_GT1 | gene_product=PPIase cyclophilin-type domain-containing protein [Source:UniProtKB/TrEMBL;Acc:S7UY14] | transcript_product=putative cyclophilin | location=TGGT1_chrVIIb:1173800-1177155(-) | protein_length=311 | sequence_SO=chromosome | SO=protein_coding_gene | is_pseudo=false	0.002	4.456	5	1	1	1	311	34.6	9.28	4.46	1	0.93	1.096	0.796	0.906	0.737	0.61	0.558	0.506	0.6	47	43.7	51.5	37.4	42.6	34.6	28.7	26.2	23.8	28.2	High	High	High	High	High	High	High	High	High	High	1
-1.97053e+18	FALSE	High	IsMasterProtein	TGGT1_271420-t26_1-p1	transcript=TGGT1_271420-t26_1 | gene=TGGT1_271420 | organism=Toxoplasma_gondii_GT1 | gene_product=Porphobilinogen deaminase [Source:UniProtKB/TrEMBL;Acc:S7V4T8] | transcript_product=porphobilinogen deaminase | location=TGGT1_chrVIII:4506559-4508757(-) | protein_length=732 | sequence_SO=chromosome | SO=protein_coding_gene | is_pseudo=false	0.002	4.344	1	1	2	1	732	76.7	8.92	5.58	1	1.291	1.226	1.141	1.237	0.895	0.881	0.697	0.789	0.78	47	60.7	57.6	53.6	58.1	42.1	41.4	32.7	37.1	36.6	High	High	High	High	High	High	High	High	High	High	1
6.32267e+18	FALSE	High	IsMasterProtein	TGGT1_320690-t26_1-p1	transcript=TGGT1_320690-t26_1 | gene=TGGT1_320690 | organism=Toxoplasma_gondii_GT1 | gene_product=Putative gamma-soluble NSF attachment protein [Source:UniProtKB/TrEMBL;Acc:S7VYF8] | transcript_product=putative gamma-soluble NSF attachment protein | location=TGGT1_chrIV:79374-81917(-) | protein_length=407 | sequence_SO=chromosome | SO=protein_coding_gene | is_pseudo=false	0	7.955	5	2	3	2	407	44.5	6.21	10.06	2	2.019	2.409	0.901	1.682	0.683	1.007	0.785	0.574	0.661	47	94.9	113.2	42.4	79.1	32.1	47.3	36.9	27	31.1	High	High	High	High	High	High	High	High	High	High	1
7.75898e+18	FALSE	High	IsMasterProtein	TGGT1_201130-t26_1-p1	transcript=TGGT1_201130-t26_1 | gene=TGGT1_201130 | organism=Toxoplasma_gondii_GT1 | gene_product=Protein kinase domain-containing protein [Source:UniProtKB/TrEMBL;Acc:S7UV83] | transcript_product=rhoptry kinase family protein ROP33 | location=TGGT1_chrVIIa:3922773-3926189(+) | protein_length=746 | sequence_SO=chromosome | SO=protein_coding_gene | is_pseudo=false	0	35.329	12	4	8	4	746	80.1	5.87	33.73	4	1.012	1.39	1.168	1.059	0.886	0.771	0.536	0.558	0.345	47.3	47.9	65.7	55.2	50.1	41.9	36.5	25.3	26.4	16.3	High	High	High	High	High	High	High	High	High	High	1
-2.70283e+18	FALSE	High	IsMasterProtein	TGGT1_203150-t26_1-p1	transcript=TGGT1_203150-t26_1 | gene=TGGT1_203150 | organism=Toxoplasma_gondii_GT1 | gene_product=hypothetical protein | transcript_product=hypothetical protein | location=TGGT1_chrVIIa:2636476-2642600(+) | protein_length=1797 | sequence_SO=chromosome | SO=protein_coding_gene | is_pseudo=false	0	9.412	2	2	2	2	1797	187.6	5.07	5.78	2	1.099	1.413	1.048	1.049	0.884	0.857	0.659	0.78	0.706	47.5	52.2	67.1	49.8	49.8	42	40.7	31.3	37.1	33.5	High	High	High	High	High	High	High	High	High	High	1
-1.20706e+18	FALSE	Medium	IsMasterProtein	TGGT1_283590B-t26_1-p1	transcript=TGGT1_283590B-t26_1 | gene=TGGT1_283590B | organism=Toxoplasma_gondii_GT1 | gene_product=NLI interacting factor family phosphatase [Source:UniProtKB/TrEMBL;Acc:S7UNH5] | transcript_product=NLI interacting factor family phosphatase | location=TGGT1_chrV:2903379-2904543(+) | protein_length=123 | sequence_SO=chromosome | SO=protein_coding_gene | is_pseudo=false	0.023	1.766	11	1	1	1	123	13.7	9.17	2.64	1	1.244	1.502	0.863	0.904	0.785	0.716	0.447	0.508	0.417	47.6	59.3	71.6	41.1	43.1	37.4	34.1	21.3	24.2	19.9	High	High	High	High	High	High	High	High	High	High	1
2.73985e+18	FALSE	Medium	IsMasterProtein	TGGT1_267530-t26_1-p1	transcript=TGGT1_267530-t26_1 | gene=TGGT1_267530 | organism=Toxoplasma_gondii_GT1 | gene_product=hypothetical protein | transcript_product=hypothetical protein | location=TGGT1_chrIX:432761-434266(-) | protein_length=501 | sequence_SO=chromosome | SO=protein_coding_gene | is_pseudo=false	0.043	1.376	3	1	1	1	501	54.3	7.05	0	1	1.373	0.643	0.731	0.677	0.598	0.495	0.632	0.383	0.427	47.9	65.7	30.8	35	32.4	28.6	23.7	30.2	18.3	20.4	High	High	High	High	High	High	High	High	High	High	1
6.96571e+18	FALSE	Low	IsMasterProtein	TGGT1_309780-t26_1-p1	transcript=TGGT1_309780-t26_1 | gene=TGGT1_309780 | organism=Toxoplasma_gondii_GT1 | gene_product=hypothetical protein | transcript_product=hypothetical protein | location=TGGT1_chrXI:768347-771655(+) | protein_length=270 | sequence_SO=chromosome | SO=protein_coding_gene | is_pseudo=false	0.067	1.13	4	1	2	1	270	30.4	9.96	3.76	1	1.2	1.314	1.145	0.99	0.836	0.659	0.606	0.645	0.622	48	57.6	63.1	54.9	47.5	40.1	31.6	29.1	30.9	29.8	High	High	High	High	High	High	High	High	High	High	1
1.6731e+18	FALSE	High	IsMasterProtein	TGGT1_310720B-t26_1-p1	transcript=TGGT1_310720B-t26_1 | gene=TGGT1_310720B | organism=Toxoplasma_gondii_GT1 | gene_product=hypothetical protein | transcript_product=hypothetical protein | location=TGGT1_chrXI:1499057-1507039(-) | protein_length=1189 | sequence_SO=chromosome | SO=protein_coding_gene | is_pseudo=false	0.003	3.8	1	1	1	1	1189	124.7	6.58	2.46	1	1.038	1.565	0.901	0.808	0.596	0.407	0.301	0.289	0.285	48	49.9	75.2	43.3	38.8	28.6	19.5	14.5	13.9	13.7	High	High	High	High	High	High	High	High	High	High	1
-6.45535e+18	FALSE	Medium	IsMasterProtein	TGGT1_202310-t26_1-p1	transcript=TGGT1_202310-t26_1 | gene=TGGT1_202310 | organism=Toxoplasma_gondii_GT1 | gene_product=Probable tRNA N6-adenosine threonylcarbamoyltransferase [Source:UniProtKB/TrEMBL;Acc:S7UUY1] | transcript_product=O-sialoglycoprotein endopeptidase | location=TGGT1_chrVIIa:3327812-3330409(+) | protein_length=580 | sequence_SO=chromosome | SO=protein_coding_gene | is_pseudo=false	0.048	1.313	3	1	1	1	580	62.6	7.09	2.6	1	1.331	1.5	1.062	1.14	0.815	0.632	0.508	0.555	0.425	48.5	64.5	72.7	51.5	55.3	39.5	30.7	24.6	26.9	20.6	High	High	High	High	High	High	High	High	High	High	1
-1.6943e+18	FALSE	High	IsMasterProtein	TGGT1_321300-t26_1-p1	transcript=TGGT1_321300-t26_1 | gene=TGGT1_321300 | organism=Toxoplasma_gondii_GT1 | gene_product=Ubiquitin-like protein ATG12 [Source:UniProtKB/TrEMBL;Acc:S7UJ65] | transcript_product=putative autophagy-related 12 variant 1 | location=TGGT1_chrIb:1902556-1907847(+) | protein_length=681 | sequence_SO=chromosome | SO=protein_coding_gene | is_pseudo=false	0	15.286	5	2	4	2	681	73.4	5.1	14.23	2	1.21	1.32	1.051	1.004	0.849	0.73	0.718	0.719	0.69	48.6	58.8	64.1	51.1	48.8	41.2	35.5	34.9	34.9	33.5	High	High	High	High	High	High	High	High	High	High	1
4.90777e+18	FALSE	High	IsMasterProtein	TGGT1_205220-t26_1-p1	transcript=TGGT1_205220-t26_1 | gene=TGGT1_205220 | organism=Toxoplasma_gondii_GT1 | gene_product=PRP1_N domain-containing protein [Source:UniProtKB/TrEMBL;Acc:S7UTZ4] | transcript_product=putative U5 snRNP-associated subunit | location=TGGT1_chrVIIa:1443394-1451209(+) | protein_length=1113 | sequence_SO=chromosome | SO=protein_coding_gene | is_pseudo=false	0	9.488	3	2	2	2	1113	122.7	8.88	5.78	2	0.939	1.193	0.718	0.685	0.407	0.393	0.34	0.242	0.211	48.8	45.8	58.2	35	33.4	19.9	19.2	16.6	11.8	10.3	High	High	High	High	High	High	High	High	High	High	1
-7.14335e+18	FALSE	High	IsMasterProtein	TGGT1_275802-t26_1-p1	transcript=TGGT1_275802-t26_1 | gene=TGGT1_275802 | organism=Toxoplasma_gondii_GT1 | gene_product=SRP72 domain-containing protein [Source:UniProtKB/TrEMBL;Acc:S7UNG8] | transcript_product=SRP72 RNA-binding domain-containing protein | location=TGGT1_chrIII:207327-214479(-) | protein_length=731 | sequence_SO=chromosome | SO=protein_coding_gene | is_pseudo=false	0.005	2.933	1	1	3	1	731	79.9	8.24	7.52	1	0.746	0.701	0.718	0.619	0.906	0.27	0.331	0.803	0.623	48.9	36.5	34.3	35.1	30.3	44.3	13.2	16.2	39.3	30.5	High	High	High	High	High	High	High	High	High	High	1
-7.89313e+18	FALSE	Low	IsMasterProtein	TGGT1_208800-t26_1-p1	transcript=TGGT1_208800-t26_1 | gene=TGGT1_208800 | organism=Toxoplasma_gondii_GT1 | gene_product=Mediator complex subunit MED18 [Source:UniProtKB/TrEMBL;Acc:S7UJH8] | transcript_product=mediator complex subunit MED18 | location=TGGT1_chrIb:882627-885696(+) | protein_length=302 | sequence_SO=chromosome | SO=protein_coding_gene | is_pseudo=false	0.053	1.259	2	1	1	1	302	33.8	6.55	0	1	1.194	1.611	1.077	1.091	0.826	0.694	0.598	0.523	0.466	49	58.5	78.9	52.8	53.4	40.5	34	29.3	25.6	22.8	High	High	High	High	High	High	High	High	High	High	1
3.74188e+18	FALSE	Medium	IsMasterProtein	TGGT1_203280-t26_1-p1	transcript=TGGT1_203280-t26_1 | gene=TGGT1_203280 | organism=Toxoplasma_gondii_GT1 | gene_product=hypothetical protein | transcript_product=hypothetical protein | location=TGGT1_chrVIIa:2520041-2522364(-) | protein_length=192 | sequence_SO=chromosome | SO=protein_coding_gene | is_pseudo=false	0.018	1.936	4	1	2	1	192	22.5	9.96	5.24	1	1.222	1.271	1.035	1.079	0.977	0.907	0.786	0.741	0.81	49.3	60.3	62.7	51	53.2	48.2	44.7	38.7	36.5	39.9	High	High	High	High	High	High	High	High	High	High	1
2.44585e+18	FALSE	High	IsMasterProtein	TGGT1_301120-t26_1-p1	transcript=TGGT1_301120-t26_1 | gene=TGGT1_301120 | organism=Toxoplasma_gondii_GT1 | gene_product=Acetyl-CoA acetyltransferase [Source:UniProtKB/TrEMBL;Acc:A0A125YTZ2] | transcript_product=acetyl-CoA acetyltransferase | location=TGGT1_chrIV:2160787-2165762(-) | protein_length=413 | sequence_SO=chromosome | SO=protein_coding_gene | is_pseudo=false	0	11.847	8	3	4	3	413	43.9	8.27	14.17	3	1.051	1.025	0.921	0.789	0.735	0.287	0.338	0.3	0.35	49.4	51.9	50.6	45.5	39	36.3	14.2	16.7	14.8	17.3	High	High	High	High	High	High	High	High	High	High	1
8.61877e+18	FALSE	High	IsMasterProtein	TGGT1_251490-t26_1-p1	transcript=TGGT1_251490-t26_1 | gene=TGGT1_251490 | organism=Toxoplasma_gondii_GT1 | gene_product=ACR, COG2135 domain-containing protein [Source:UniProtKB/TrEMBL;Acc:S7V032] | transcript_product=ACR, COG2135 domain-containing protein | location=TGGT1_chrXII:5348097-5352442(-) | protein_length=466 | sequence_SO=chromosome | SO=protein_coding_gene | is_pseudo=false	0	9.647	6	1	1	1	466	50.2	9.25	6.38	1	1.245	1.438	1.001	1.157	0.719	0.603	0.575	0.43	0.579	49.4	61.5	71	49.5	57.2	35.5	29.8	28.4	21.2	28.6	High	High	High	High	High	High	High	High	High	High	1
5.3915e+18	FALSE	High	IsMasterProtein	TGGT1_244050-t26_1-p1	transcript=TGGT1_244050-t26_1 | gene=TGGT1_244050 | organism=Toxoplasma_gondii_GT1 | gene_product=hypothetical protein | transcript_product=hypothetical protein | location=TGGT1_chrVI:2902668-2909942(+) | protein_length=1738 | sequence_SO=chromosome | SO=protein_coding_gene | is_pseudo=false	0	7.411	1	2	4	1	1738	189.8	6.15	11.6	2	1.206	1.463	1.122	1.231	0.805	0.72	0.577	0.488	0.441	49.4	59.6	72.3	55.5	60.8	39.8	35.6	28.5	24.1	21.8	High	High	High	High	High	High	High	High	High	High	1
7.8979e+18	FALSE	High	IsMasterProtein	TGGT1_202850-t26_1-p1	transcript=TGGT1_202850-t26_1 | gene=TGGT1_202850 | organism=Toxoplasma_gondii_GT1 | gene_product=Diphthami_syn_2 domain-containing protein [Source:UniProtKB/TrEMBL;Acc:S7WAM4] | transcript_product=ATP-binding domain-containing protein | location=TGGT1_chrVIIa:2880401-2888538(+) | protein_length=1916 | sequence_SO=chromosome | SO=protein_coding_gene | is_pseudo=false	0.001	6.073	1	2	2	2	1916	207.3	6.09	6	2	0.943	0.932	0.951	0.765	0.645	0.563	0.37	0.386	0.361	49.6	46.8	46.2	47.2	37.9	32	27.9	18.4	19.2	17.9	High	High	High	High	High	High	High	High	High	High	1
3.56468e+18	FALSE	High	IsMasterProtein	TGGT1_208750-t26_1-p1	transcript=TGGT1_208750-t26_1 | gene=TGGT1_208750 | organism=Toxoplasma_gondii_GT1 | gene_product=RWD domain-containing protein [Source:UniProtKB/TrEMBL;Acc:S7UJH2] | transcript_product=RWD domain-containing protein | location=TGGT1_chrIb:861884-864672(+) | protein_length=268 | sequence_SO=chromosome | SO=protein_coding_gene | is_pseudo=false	0	20.773	10	1	5	1	268	30.3	4.32	27.68	1	1.29	1.872	1.079	1.618	1.418	1.558	1.332	1.591	1.732	49.7	64.1	93	53.6	80.4	70.5	77.4	66.2	79.1	86	High	High	High	High	High	High	High	High	High	High	1
-3.37813e+18	FALSE	High	IsMasterProtein	TGGT1_266310-t26_1-p1	transcript=TGGT1_266310-t26_1 | gene=TGGT1_266310 | organism=Toxoplasma_gondii_GT1 | gene_product=Alpha-1,3-mannosyl-glycoprotein 2-beta-N-acetylglucosaminyltransferase [Source:UniProtKB/TrEMBL;Acc:S7UHT8] | transcript_product=Alpha-1,3-mannosyl-glycoprotein 2-beta-N-acetylglucosaminyltransferase | location=TGGT1_chrIX:1048778-1055191(+) | protein_length=599 | sequence_SO=chromosome | SO=protein_…	0	10.937	4	1	1	1	599	65.1	8.29	5.09	1	1.344	1.594	1.024	1.188	0.924	0.759	0.519	0.619	0.387	49.7	66.8	79.3	50.9	59.1	46	37.8	25.8	30.8	19.3	High	High	High	High	High	High	High	High	High	High	1
-8.41127e+18	FALSE	High	IsMasterProtein	TGGT1_230700-t26_1-p1	transcript=TGGT1_230700-t26_1 | gene=TGGT1_230700 | organism=Toxoplasma_gondii_GT1 | gene_product=hypothetical protein | transcript_product=hypothetical protein | location=TGGT1_chrVIII:972869-983217(+) | protein_length=1962 | sequence_SO=chromosome | SO=protein_coding_gene | is_pseudo=false	0.005	3.08	1	2	2	1	1962	212.4	5.71	4.37	2	1.057	1.084	0.86	0.872	0.802	0.614	0.434	0.501	0.496	49.8	52.7	54	42.9	43.4	39.9	30.6	21.6	24.9	24.7	High	High	High	High	High	High	High	High	High	High	1
3.26023e+18	FALSE	Low	IsMasterProtein	TGGT1_258230-t26_1-p1	transcript=TGGT1_258230-t26_1 | gene=TGGT1_258230 | organism=Toxoplasma_gondii_GT1 | gene_product=Protein kinase domain-containing protein [Source:UniProtKB/TrEMBL;Acc:S7WET0] | transcript_product=rhoptry kinase family protein ROP20 | location=TGGT1_chrVIIb:3456955-3458613(-) | protein_length=552 | sequence_SO=chromosome | SO=protein_coding_gene | is_pseudo=false	0.058	1.214	2	1	1	1	552	61	8.18	2.3	1	1.043	1.126	0.811	0.583	0.481	0.3	0.235	0.225	0.292	50.4	52.5	56.7	40.8	29.4	24.2	15.1	11.8	11.3	14.7	High	High	High	High	High	High	High	High	High	High	1
-8.91886e+18	FALSE	High	IsMasterProtein	TGGT1_222240-t26_1-p1	transcript=TGGT1_222240-t26_1 | gene=TGGT1_222240 | organism=Toxoplasma_gondii_GT1 | gene_product=hypothetical protein | transcript_product=hypothetical protein | location=TGGT1_chrII:970146-973217(+) | protein_length=1023 | sequence_SO=chromosome | SO=protein_coding_gene | is_pseudo=false	0.002	4.341	1	1	2	1	1023	107.8	5.76	5.84	1	1.199	1.255	1.065	1.025	1.057	0.804	0.647	0.829	0.811	50.6	60.7	63.5	53.9	51.8	53.5	40.7	32.7	42	41	High	High	High	High	High	High	High	High	High	High	1
1.60691e+18	FALSE	High	IsMasterProtein	TGGT1_255450-t26_1-p1	transcript=TGGT1_255450-t26_1 | gene=TGGT1_255450 | organism=Toxoplasma_gondii_GT1 | gene_product=hypothetical protein | transcript_product=hypothetical protein | location=TGGT1_chrVIIb:4723734-4728848(+) | protein_length=625 | sequence_SO=chromosome | SO=protein_coding_gene | is_pseudo=false	0.001	5.429	2	1	2	1	625	68.3	6.76	3.64	1	1.164	1.156	0.817	1.26	0.847	0.698	0.654	0.463	0.609	50.7	59	58.6	41.4	63.8	42.9	35.3	33.1	23.4	30.9	High	High	High	High	High	High	High	High	High	High	1
-9.12609e+18	FALSE	High	IsMasterProtein	TGGT1_212760-t26_1-p1	transcript=TGGT1_212760-t26_1 | gene=TGGT1_212760 | organism=Toxoplasma_gondii_GT1 | gene_product=hypothetical protein | transcript_product=hypothetical protein | location=TGGT1_chrV:452613-452834(-) | protein_length=73 | sequence_SO=chromosome | SO=protein_coding_gene | is_pseudo=false	0.002	4.097	11	1	1	1	73	8.1	8.18	2.46	1	1.003	1.272	0.864	0.828	0.974	0.791	0.782	0.846	0.974	50.8	50.9	64.6	43.9	42.1	49.5	40.2	39.7	42.9	49.5	High	High	High	High	High	High	High	High	High	High	1
5.77618e+18	FALSE	High	IsMasterProtein	TGGT1_306640-t26_1-p1	transcript=TGGT1_306640-t26_1 | gene=TGGT1_306640 | organism=Toxoplasma_gondii_GT1 | gene_product=t-SNARE coiled-coil homology domain-containing protein [Source:UniProtKB/TrEMBL;Acc:S7UID7] | transcript_product=hypothetical protein | location=TGGT1_chrIX:6015453-6017604(-) | protein_length=376 | sequence_SO=chromosome | SO=protein_coding_gene | is_pseudo=false	0	7.068	5	1	1	1	376	41.1	5.82	4.33	1	1.105	1.242	1.021	1.093	1.022	0.886	0.685	0.821	0.677	50.9	56.2	63.2	51.9	55.6	52	45.1	34.8	41.8	34.4	High	High	High	High	High	High	High	High	High	High	1
1.60855e+18	FALSE	High	IsMasterProtein	TGGT1_247580-t26_1-p1	transcript=TGGT1_247580-t26_1 | gene=TGGT1_247580 | organism=Toxoplasma_gondii_GT1 | gene_product=Glutaredoxin domain-containing protein [Source:UniProtKB/TrEMBL;Acc:S7WH76] | transcript_product=glutaredoxin domain-containing protein | location=TGGT1_chrXII:3356004-3357311(-) | protein_length=312 | sequence_SO=chromosome | SO=protein_coding_gene | is_pseudo=false	0.003	3.964	4	1	1	1	312	34.3	7.53	3.61	1	1.15	1.288	0.989	1.091	1.12	0.745	0.783	0.752	0.657	51.1	58.8	65.8	50.6	55.8	57.2	38.1	40	38.4	33.6	High	High	High	High	High	High	High	High	High	High	1
-3.57817e+17	FALSE	High	IsMasterProtein	TGGT1_224740-t26_1-p1	transcript=TGGT1_224740-t26_1 | gene=TGGT1_224740 | organism=Toxoplasma_gondii_GT1 | gene_product=hypothetical protein | transcript_product=hypothetical protein | location=TGGT1_chrX:2749909-2755523(-) | protein_length=424 | sequence_SO=chromosome | SO=protein_coding_gene | is_pseudo=false	0	16.828	15	3	4	3	424	48.2	8.46	11	3	1.066	1.17	1.044	0.943	0.874	0.664	0.6	0.502	0.676	51.1	54.5	59.8	53.4	48.2	44.7	33.9	30.7	25.7	34.6	High	High	High	High	High	High	High	High	High	High	1
4.18669e+18	FALSE	High	IsMasterProtein	TGGT1_264460-t26_1-p1	transcript=TGGT1_264460-t26_1 | gene=TGGT1_264460 | organism=Toxoplasma_gondii_GT1 | gene_product=DNA-directed RNA polymerase III RPC5 [Source:UniProtKB/TrEMBL;Acc:S7UFQ7] | transcript_product=DNA-directed RNA polymerase III RPC5 | location=TGGT1_chrIX:2029189-2036648(+) | protein_length=827 | sequence_SO=chromosome | SO=protein_coding_gene | is_pseudo=false	0.003	3.521	2	1	1	1	827	90.3	5.02	3.18	1	1.099	1.019	0.928	2.317	1.04	0.569	0.638	0.494	0.487	51.4	56.5	52.4	47.7	119.2	53.5	29.3	32.8	25.4	25.1	High	High	High	High	High	High	High	High	High	High	1
-9.05946e+18	FALSE	High	IsMasterProtein	TGGT1_318760-t26_1-p1	transcript=TGGT1_318760-t26_1 | gene=TGGT1_318760 | organism=Toxoplasma_gondii_GT1 | gene_product=hypothetical protein | transcript_product=hypothetical protein | location=TGGT1_chrIV:1046468-1049934(-) | protein_length=318 | sequence_SO=chromosome | SO=protein_coding_gene | is_pseudo=false	0	12.794	7	1	3	1	318	36.3	6.15	16.87	1	1.404	1.334	1.115	1.163	0.91	0.816	0.792	0.689	0.77	51.7	72.6	69	57.7	60.2	47.1	42.2	41	35.7	39.8	High	High	High	High	High	High	High	High	High	High	1
4.79832e+18	FALSE	High	IsMasterProtein	TGGT1_225580-t26_1-p1	transcript=TGGT1_225580-t26_1 | gene=TGGT1_225580 | organism=Toxoplasma_gondii_GT1 | gene_product=Nas2_N domain-containing protein [Source:UniProtKB/TrEMBL;Acc:S7UWZ0] | transcript_product=putative proteasome (prosome, macropain) 26S subunit, non-ATPase, 9 | location=TGGT1_chrX:2053855-2055459(+) | protein_length=244 | sequence_SO=chromosome | SO=protein_coding_gene | is_pseudo=false	0	9.365	9	1	2	1	244	26.6	5.02	7.99	1	0.922	0.963	0.811	0.806	0.689	0.361	0.287	0.239	0.205	52	47.9	50	42.2	41.9	35.8	18.7	14.9	12.4	10.7	High	High	High	High	High	High	High	High	High	High	1
1.76376e+18	FALSE	High	IsMasterProtein	TGGT1_293200-t26_1-p1	transcript=TGGT1_293200-t26_1 | gene=TGGT1_293200 | organism=Toxoplasma_gondii_GT1 | gene_product=hypothetical protein | transcript_product=hypothetical protein | location=TGGT1_chrIa:144300-147612(+) | protein_length=112 | sequence_SO=chromosome | SO=protein_coding_gene | is_pseudo=false	0	7.252	15	1	1	1	112	12.1	9.28	4.23	1	1.244	1.556	1.221	1.082	0.982	0.679	0.529	0.462	0.512	52.2	64.9	81.2	63.7	56.4	51.2	35.4	27.6	24.1	26.7	High	High	High	High	High	High	High	High	High	High	1
9.99664e+17	FALSE	High	IsMasterProtein	TGGT1_268970-t26_1-p1	transcript=TGGT1_268970-t26_1 | gene=TGGT1_268970 | organism=Toxoplasma_gondii_GT1 | gene_product=hypothetical protein | transcript_product=hypothetical protein | location=TGGT1_chrVIII:6173540-6174541(+) | protein_length=333 | sequence_SO=chromosome | SO=protein_coding_gene | is_pseudo=false	0	8.488	5	1	1	1	333	36.2	8.24	6.34	1	1.212	1.325	1.075	1.168	0.893	0.484	0.553	0.399	0.451	52.4	63.5	69.4	56.3	61.2	46.8	25.3	29	20.9	23.6	High	High	High	High	High	High	High	High	High	High	1
4.75061e+18	FALSE	High	IsMasterProtein	TGGT1_202120-t26_1-p1	transcript=TGGT1_202120-t26_1 | gene=TGGT1_202120 | organism=Toxoplasma_gondii_GT1 | gene_product=PH domain-containing protein [Source:UniProtKB/TrEMBL;Acc:S7UV62] | transcript_product=hypothetical protein | location=TGGT1_chrVIIa:3483252-3507091(-) | protein_length=1323 | sequence_SO=chromosome | SO=protein_coding_gene | is_pseudo=false	0.001	6.19	1	1	3	1	1323	147.2	5.69	9.52	1	1.499	1.655	0.928	1.395	0.881	1.5	1.636	1.242	1.663	52.4	78.6	86.8	48.7	73.1	46.2	78.6	85.7	65.1	87.2	High	High	High	High	High	High	High	High	High	High	1
2.65635e+18	FALSE	High	IsMasterProtein	TGGT1_225840-t26_1-p1	transcript=TGGT1_225840-t26_1 | gene=TGGT1_225840 | organism=Toxoplasma_gondii_GT1 | gene_product=hypothetical protein | transcript_product=hypothetical protein | location=TGGT1_chrX:1921606-1924485(+) | protein_length=686 | sequence_SO=chromosome | SO=protein_coding_gene | is_pseudo=false	0.001	6.184	2	1	2	1	686	73.3	4.91	6.08	1	1.075	1.167	0.888	0.83	0.764	0.618	0.545	0.436	0.421	52.7	56.6	61.4	46.8	43.7	40.2	32.5	28.7	22.9	22.2	High	High	High	High	High	High	High	High	High	High	1
-8.28272e+18	FALSE	High	IsMasterProtein	TGGT1_411770-t26_1-p1	transcript=TGGT1_411770-t26_1 | gene=TGGT1_411770 | organism=Toxoplasma_gondii_GT1 | gene_product=Putative IgA-specific serine endopeptidase [Source:UniProtKB/TrEMBL;Acc:S7UFX5] | transcript_product=putative IgA-specific serine endopeptidase | location=AAQM03000538:82-1007(+) | protein_length=292 | sequence_SO=contig | SO=protein_coding_gene | is_pseudo=false	0	22.151	21	3	9	2	292	30.4	3.88	38.62	3	1.112	1.282	0.983	0.91	1.156	0.765	0.823	0.706	0.735	52.8	58.7	67.7	51.8	48	61	40.4	43.4	37.3	38.8	High	High	High	High	High	High	High	High	High	High	1
-3.28369e+18	FALSE	Medium	IsMasterProtein	TGGT1_229380-t26_1-p1	transcript=TGGT1_229380-t26_1 | gene=TGGT1_229380 | organism=Toxoplasma_gondii_GT1 | gene_product=LRAT domain-containing protein [Source:UniProtKB/TrEMBL;Acc:S7WBL2] | transcript_product=hypothetical protein | location=TGGT1_chrVIII:216517-221261(+) | protein_length=1001 | sequence_SO=chromosome | SO=protein_coding_gene | is_pseudo=false	0.012	2.212	1	1	1	1	1001	108	6.14	2.7	1	1.138	1.338	0.971	0.99	0.805	0.495	0.463	0.554	0.475	53	60.3	70.9	51.5	52.5	42.7	26.2	24.5	29.4	25.2	High	High	High	High	High	High	High	High	High	High	1
6.62256e+18	FALSE	Medium	IsMasterProtein	TGGT1_244130-t26_1-p1	transcript=TGGT1_244130-t26_1 | gene=TGGT1_244130 | organism=Toxoplasma_gondii_GT1 | gene_product=hypothetical protein | transcript_product=hypothetical protein | location=TGGT1_chrVI:2963739-2972106(+) | protein_length=2426 | sequence_SO=chromosome | SO=protein_coding_gene | is_pseudo=false	0.025	1.73	0	1	1	1	2426	254.2	7.88	2.08	1	1.342	1.119	1.209	0.771	0.857	0.572	0.73	0.44	0.473	53.1	71.3	59.5	64.2	41	45.5	30.4	38.8	23.4	25.1	High	High	High	High	High	High	High	High	High	High	1
-3.38774e+18	FALSE	Low	IsMasterProtein	TGGT1_234640-t26_1-p1	transcript=TGGT1_234640-t26_1 | gene=TGGT1_234640 | organism=Toxoplasma_gondii_GT1 | gene_product=Not3 domain-containing protein [Source:UniProtKB/TrEMBL;Acc:S7W4I1] | transcript_product=hypothetical protein | location=TGGT1_chrX:4400226-4410048(+) | protein_length=1761 | sequence_SO=chromosome | SO=protein_coding_gene | is_pseudo=false	0.058	1.219	0	1	1	1	1761	184.5	6.87	2.18	1	1.256	1.444	1.243	1.058	0.938	0.796	0.629	0.712	0.716	53.2	66.9	76.8	66.2	56.3	49.9	42.4	33.5	37.9	38.1	High	High	High	High	High	High	High	High	High	High	1
-4.62638e+18	FALSE	High	IsMasterProtein	TGGT1_301340-t26_1-p1	transcript=TGGT1_301340-t26_1 | gene=TGGT1_301340 | organism=Toxoplasma_gondii_GT1 | gene_product=DnaJ domain-containing protein [Source:UniProtKB/TrEMBL;Acc:S7UHM6] | transcript_product=DnaJ domain-containing protein | location=TGGT1_chrIV:2275000-2278713(+) | protein_length=692 | sequence_SO=chromosome | SO=protein_coding_gene | is_pseudo=false	0.001	4.613	2	2	2	1	692	79.5	5.48	4.92	2	1.147	1.308	0.88	0.801	0.601	0.554	0.422	0.483	0.368	53.4	61.3	69.9	47	42.8	32.1	29.6	22.6	25.8	19.7	High	High	High	High	High	High	High	High	High	High	1
8.48511e+18	FALSE	High	IsMasterProtein	TGGT1_313300-t26_1-p1	transcript=TGGT1_313300-t26_1 | gene=TGGT1_313300 | organism=Toxoplasma_gondii_GT1 | gene_product=YL1_C domain-containing protein [Source:UniProtKB/TrEMBL;Acc:S7UTH5] | transcript_product=YL1 nuclear protein C-terminal domain-containing protein | location=TGGT1_chrXI:3216718-3220045(+) | protein_length=737 | sequence_SO=chromosome | SO=protein_coding_gene | is_pseudo=false	0.001	5.052	3	2	2	2	737	82.4	4.93	4.68	2	1.35	1.454	1.005	1.046	0.916	0.682	0.628	0.57	0.639	53.7	72.5	78.1	54	56.2	49.2	36.6	33.7	30.6	34.3	High	High	High	High	High	High	High	High	High	High	1
-4.37474e+18	FALSE	High	IsMasterProtein	TGGT1_228340-t26_1-p1	transcript=TGGT1_228340-t26_1 | gene=TGGT1_228340 | organism=Toxoplasma_gondii_GT1 | gene_product=hypothetical protein | transcript_product=hypothetical protein | location=TGGT1_chrX:307953-313937(+) | protein_length=1782 | sequence_SO=chromosome | SO=protein_coding_gene | is_pseudo=false	0	9.686	1	1	1	1	1782	190.1	5.9	6.38	1	1.475	1.406	0.885	0.947	0.613	0.456	0.468	0.462	0.401	53.9	79.4	75.7	47.7	51	33	24.6	25.2	24.9	21.6	High	High	High	High	High	High	High	High	High	High	1
3.51177e+18	FALSE	High	IsMasterProtein	TGGT1_255240-t26_1-p1	transcript=TGGT1_255240-t26_1 | gene=TGGT1_255240 | organism=Toxoplasma_gondii_GT1 | gene_product=Cnd1 domain-containing protein [Source:UniProtKB/TrEMBL;Acc:S7V205] | transcript_product=hypothetical protein | location=TGGT1_chrVIIb:4877042-4891479(-) | protein_length=2465 | sequence_SO=chromosome | SO=protein_coding_gene | is_pseudo=false	0.001	5.668	1	2	2	2	2465	270	5.58	5.98	2	1.3	1.569	1.325	1.22	0.818	0.503	0.519	0.5	0.503	54	70.2	84.7	71.5	65.8	44.2	27.2	28	27	27.1	High	High	High	High	High	High	High	High	High	High	1
6.32088e+18	FALSE	High	IsMasterProtein	TGGT1_267730-t26_1-p1	transcript=TGGT1_267730-t26_1 | gene=TGGT1_267730 | organism=Toxoplasma_gondii_GT1 | gene_product=TPT domain-containing protein [Source:UniProtKB/TrEMBL;Acc:S7UHQ6] | transcript_product=hypothetical protein | location=TGGT1_chrIX:233923-235815(-) | protein_length=467 | sequence_SO=chromosome | SO=protein_coding_gene | is_pseudo=false	0.003	3.973	3	1	1	1	467	50.1	9.54	0	1	1.338	1.331	0.95	0.952	1.037	0.557	0.395	0.665	0.496	54.1	72.3	72	51.4	51.5	56.1	30.1	21.3	35.9	26.8	High	High	High	High	High	High	High	High	High	High	1
-8.81893e+18	FALSE	High	IsMasterProtein	TGGT1_248420-t26_1-p1	transcript=TGGT1_248420-t26_1 | gene=TGGT1_248420 | organism=Toxoplasma_gondii_GT1 | gene_product=hypothetical protein | transcript_product=hypothetical protein | location=TGGT1_chrXII:3772416-3776263(-) | protein_length=728 | sequence_SO=chromosome | SO=protein_coding_gene | is_pseudo=false	0	8.221	5	3	3	3	728	79	6.24	6.39	3	1.116	1.413	1.05	1.041	0.8	0.528	0.479	0.537	0.385	54.4	60.7	76.9	57.1	56.6	43.5	28.7	26.1	29.2	20.9	High	High	High	High	High	High	High	High	High	High	1
-1.89749e+18	FALSE	High	IsMasterProtein	TGGT1_319650-t26_1-p1	transcript=TGGT1_319650-t26_1 | gene=TGGT1_319650 | organism=Toxoplasma_gondii_GT1 | gene_product=RNase_PH domain-containing protein [Source:UniProtKB/TrEMBL;Acc:S7VYP8] | transcript_product=3' exoribonuclease family, domain 1 domain-containing protein | location=TGGT1_chrIV:750761-756340(-) | protein_length=303 | sequence_SO=chromosome | SO=protein_coding_gene | is_pseudo=false	0.003	3.797	6	2	3	2	303	32.5	6.42	6.23	2	1.375	1.946	0.953	1.042	1.124	0.789	0.721	0.579	0.937	54.5	74.9	106	51.9	56.8	61.2	43	39.3	31.6	51.1	High	High	High	High	High	High	High	High	High	High	1
-3.99941e+18	FALSE	High	IsMasterProtein	TGGT1_260010-t26_1-p1	transcript=TGGT1_260010-t26_1 | gene=TGGT1_260010 | organism=Toxoplasma_gondii_GT1 | gene_product=N-acetyltransferase domain-containing protein [Source:UniProtKB/TrEMBL;Acc:A0A125YJ51] | transcript_product=acetyltransferase, GNAT family protein | location=TGGT1_chrVIIb:2501650-2503882(+) | protein_length=236 | sequence_SO=chromosome | SO=protein_coding_gene | is_pseudo=false	0.001	5.997	12	2	2	2	236	25.8	7.81	4.35	2	1.081	1.127	0.87	0.884	0.762	0.594	0.525	0.452	0.641	54.5	59	61.4	47.4	48.2	41.5	32.4	28.6	24.7	35	High	High	High	High	High	High	High	High	High	High	1
8.71895e+18	FALSE	High	IsMasterProtein	TGGT1_221922-t26_1-p1	transcript=TGGT1_221922-t26_1 | gene=TGGT1_221922 | organism=Toxoplasma_gondii_GT1 | gene_product=NifU domain-containing protein [Source:UniProtKB/TrEMBL;Acc:S7ULE4] | transcript_product=NifU family domain-containing protein | location=TGGT1_chrII:679360-682896(+) | protein_length=483 | sequence_SO=chromosome | SO=protein_coding_gene | is_pseudo=false	0	13.427	4	1	4	1	483	51.8	5.68	27.79	1	1.201	1.422	1.107	0.996	1.102	1.059	1.048	1.064	1.033	54.6	65.5	77.6	60.4	54.4	60.1	57.8	57.2	58.1	56.4	High	High	High	High	High	High	High	High	High	High	1
-8.69908e+18	FALSE	High	IsMasterProtein	TGGT1_215710-t26_1-p1	transcript=TGGT1_215710-t26_1 | gene=TGGT1_215710 | organism=Toxoplasma_gondii_GT1 | gene_product=hypothetical protein | transcript_product=hypothetical protein | location=TGGT1_chrX:7008463-7019753(+) | protein_length=810 | sequence_SO=chromosome | SO=protein_coding_gene | is_pseudo=false	0	14.388	5	3	3	3	810	89.2	8.24	10.65	3	1.127	1.296	0.845	0.892	0.651	0.468	0.415	0.42	0.323	54.8	61.7	70.9	46.2	48.8	35.7	25.6	22.7	23	17.7	High	High	High	High	High	High	High	High	High	High	1
8.00852e+18	FALSE	High	IsMasterProtein	TGGT1_301480A-t26_1-p1	transcript=TGGT1_301480A-t26_1 | gene=TGGT1_301480A | organism=Toxoplasma_gondii_GT1 | gene_product=hypothetical protein | transcript_product=hypothetical protein | location=AAQM03000332:604-2331(+) | protein_length=576 | sequence_SO=contig | SO=protein_coding_gene | is_pseudo=false	0	14.392	5	2	2	2	576	58.8	4.64	9.08	2	1.171	1.549	1.065	1.064	1.007	0.826	0.63	0.808	0.555	55.1	64.6	85.4	58.7	58.6	55.5	45.5	34.7	44.5	30.6	High	High	High	High	High	High	High	High	High	High	1
-2.83357e+18	FALSE	High	IsMasterProtein	TGGT1_240850-t26_1-p1	transcript=TGGT1_240850-t26_1 | gene=TGGT1_240850 | organism=Toxoplasma_gondii_GT1 | gene_product=WD domain, G-beta repeat-containing protein [Source:UniProtKB/TrEMBL;Acc:S7W6X8] | transcript_product=WD domain, G-beta repeat-containing protein | location=TGGT1_chrVI:1446379-1451610(+) | protein_length=547 | sequence_SO=chromosome | SO=protein_coding_gene | is_pseudo=false	0.003	3.563	2	1	1	1	547	59.2	9.06	2.25	1	1.086	1.414	0.776	0.724	0.574	0.46	0.383	0.389	0.457	56.4	61.2	79.7	43.8	40.8	32.4	26	21.6	21.9	25.8	High	High	High	High	High	High	High	High	High	High	1
-4.4607e+18	FALSE	High	IsMasterProtein	TGGT1_306000-t26_1-p1	transcript=TGGT1_306000-t26_1 | gene=TGGT1_306000 | organism=Toxoplasma_gondii_GT1 | gene_product=AP2 domain transcription factor AP2IX-8 [Source:UniProtKB/TrEMBL;Acc:S7VQV0] | transcript_product=AP2 domain transcription factor AP2IX-8 | location=TGGT1_chrIX:5495092-5500645(+) | protein_length=1757 | sequence_SO=chromosome | SO=protein_coding_gene | is_pseudo=false	0	17.367	4	3	4	3	1757	176.9	7.14	18.16	3	1.381	1.706	0.837	1.166	0.938	0.68	0.63	0.469	0.54	56.8	78.5	96.9	47.5	66.2	53.3	38.6	35.8	26.7	30.7	High	High	High	High	High	High	High	High	High	High	1
8.26768e+18	FALSE	High	IsMasterProtein	TGGT1_287160-t26_1-p1	transcript=TGGT1_287160-t26_1 | gene=TGGT1_287160 | organism=Toxoplasma_gondii_GT1 | gene_product=Kinesin motor domain-containing protein [Source:UniProtKB/TrEMBL;Acc:S7W3C3] | transcript_product=internal kinesin motor domain protein | location=TGGT1_chrV:1414937-1425049(-) | protein_length=1360 | sequence_SO=chromosome | SO=protein_coding_gene | is_pseudo=false	0.009	2.417	1	1	5	1	1360	144	8.87	13.3	1	1.566	1.537	1.023	1.233	0.846	0.594	0.5	0.72	0.566	56.8	88.9	87.3	58.1	70	48.1	33.8	28.4	40.9	32.1	High	High	High	High	High	High	High	High	High	High	1
7.03538e+18	FALSE	High	IsMasterProtein	TGGT1_278770-t26_1-p1	transcript=TGGT1_278770-t26_1 | gene=TGGT1_278770 | organism=Toxoplasma_gondii_GT1 | gene_product=hypothetical protein | transcript_product=hypothetical protein | location=TGGT1_chrXII:5799697-5806443(-) | protein_length=980 | sequence_SO=chromosome | SO=protein_coding_gene | is_pseudo=false	0.001	6.034	3	2	3	2	980	106.3	6.28	7.27	2	1.064	1.432	1.047	1.139	0.955	0.717	0.585	0.557	0.556	56.9	60.6	81.5	59.6	64.8	54.4	40.8	33.3	31.7	31.6	High	High	High	High	High	High	High	High	High	High	1
-8.04469e+18	FALSE	High	IsMasterProtein	TGGT1_249740-t26_1-p1	transcript=TGGT1_249740-t26_1 | gene=TGGT1_249740 | organism=Toxoplasma_gondii_GT1 | gene_product=Translation machinery associated tma7 protein [Source:UniProtKB/TrEMBL;Acc:S7WG98] | transcript_product=translation machinery associated tma7 protein | location=TGGT1_chrXII:4713253-4716150(+) | protein_length=133 | sequence_SO=chromosome | SO=protein_coding_gene | is_pseudo=false	0.001	6.669	10	1	1	1	133	14.6	10.01	2.83	1	1.019	1.544	0.91	1.111	1.194	1.009	0.939	0.912	1.1	57.1	58.2	88.2	52	63.5	68.2	57.6	53.7	52.1	62.9	High	High	High	High	High	High	High	High	High	High	1
-3.86486e+18	FALSE	High	IsMasterProtein	TGGT1_206580-t26_1-p1	transcript=TGGT1_206580-t26_1 | gene=TGGT1_206580 | organism=Toxoplasma_gondii_GT1 | gene_product=FH2 domain-containing protein [Source:UniProtKB/TrEMBL;Acc:S7W9L4] | transcript_product=formin FRM2 | location=TGGT1_chrVIIa:788142-805346(+) | protein_length=4709 | sequence_SO=chromosome | SO=protein_coding_gene | is_pseudo=false	0	7.518	1	2	3	2	4709	491.2	8.12	8.37	2	1.31	1.326	1.067	1.133	0.83	0.74	0.721	0.54	0.467	57.1	74.8	75.7	61	64.7	47.4	42.3	41.2	30.8	26.7	High	High	High	High	High	High	High	High	High	High	1
-3.58058e+18	FALSE	High	IsMasterProtein	TGGT1_285520-t26_1-p1	transcript=TGGT1_285520-t26_1 | gene=TGGT1_285520 | organism=Toxoplasma_gondii_GT1 | gene_product=RNA cap guanine-N2 methyltransferase [Source:UniProtKB/TrEMBL;Acc:S7W2Y1] | transcript_product=RNA cap guanine-N2 methyltransferase | location=TGGT1_chrV:2204953-2213630(+) | protein_length=1659 | sequence_SO=chromosome | SO=protein_coding_gene | is_pseudo=false	0.005	3.234	1	1	1	1	1659	181.4	6.44	2.5	1	1.188	1.488	0.984	1.025	0.891	0.553	0.446	0.491	0.483	57.2	68	85.1	56.3	58.7	51	31.6	25.6	28.1	27.7	High	High	High	High	High	High	High	High	High	High	1
1.32758e+17	FALSE	High	IsMasterProtein	TGGT1_257730-t26_1-p1	transcript=TGGT1_257730-t26_1 | gene=TGGT1_257730 | organism=Toxoplasma_gondii_GT1 | gene_product=Methionine aminopeptidase [Source:UniProtKB/TrEMBL;Acc:S7WF72] | transcript_product=putative methionine aminopeptidase, type i | location=TGGT1_chrVIIb:3796036-3802967(+) | protein_length=484 | sequence_SO=chromosome | SO=protein_coding_gene | is_pseudo=false	0.003	3.95	2	1	3	1	484	52.3	9.03	8.11	1	1.181	1.5	1.124	1.124	0.833	0.563	0.518	0.472	0.459	57.2	67.6	85.9	64.3	64.3	47.7	32.2	29.6	27	26.3	High	High	High	High	High	High	High	High	High	High	1
5.32735e+17	FALSE	High	IsMasterProtein	TGGT1_260850-t26_1-p1	transcript=TGGT1_260850-t26_1 | gene=TGGT1_260850 | organism=Toxoplasma_gondii_GT1 | gene_product=zf-Tim10_DDP domain-containing protein [Source:UniProtKB/TrEMBL;Acc:S7UYS0] | transcript_product=putative mitochondrial import inner membrane translocase subunit TIM10 | location=TGGT1_chrVIIb:1974014-1974334(+) | protein_length=106 | sequence_SO=chromosome | SO=protein_coding_gene | is_pseudo=false	0.001	6.665	31	2	2	2	106	11.1	6.25	3.59	2	1.148	1.251	1.13	1.034	1.11	0.816	0.718	0.77	0.654	57.4	65.9	71.8	64.9	59.4	63.7	46.8	41.2	44.2	37.6	High	High	High	High	High	High	High	High	High	High	1
4.48893e+18	FALSE	High	IsMasterProtein	TGGT1_229450-t26_1-p1	transcript=TGGT1_229450-t26_1 | gene=TGGT1_229450 | organism=Toxoplasma_gondii_GT1 | gene_product=hypothetical protein | transcript_product=hypothetical protein | location=TGGT1_chrVIII:260098-261326(-) | protein_length=136 | sequence_SO=chromosome | SO=protein_coding_gene | is_pseudo=false	0.001	4.81	7	1	2	1	136	15	4.81	5.89	1	2.024	1.987	0.894	2.002	0.668	2.788	2.458	1.826	2.704	57.5	116.4	114.3	51.4	115.1	38.4	160.3	141.4	105	155.5	High	High	High	High	High	High	High	High	High	High	1
2.86285e+18	FALSE	High	IsMasterProtein	TGGT1_216275-t26_1-p1	transcript=TGGT1_216275-t26_1 | gene=TGGT1_216275 | organism=Toxoplasma_gondii_GT1 | gene_product=ACR, YggU family COG1872 domain-containing protein [Source:UniProtKB/TrEMBL;Acc:S7UKR4] | transcript_product=ACR, YggU family COG1872 domain-containing protein | location=TGGT1_chrXI:6184776-6187046(+) | protein_length=190 | sequence_SO=chromosome | SO=protein_coding_gene | is_pseudo=false	0	8.542	9	1	1	1	190	20.3	9.88	5.42	1	1.573	2.101	0.702	2.007	1.217	1.881	1.909	1.551	1.964	57.6	90.6	121	40.4	115.6	70.1	108.4	110	89.4	113.2	High	High	High	High	High	High	High	High	High	High	1
1.97151e+18	FALSE	Medium	IsMasterProtein	TGGT1_264970-t26_1-p1	transcript=TGGT1_264970-t26_1 | gene=TGGT1_264970 | organism=Toxoplasma_gondii_GT1 | gene_product=hypothetical protein | transcript_product=hypothetical protein | location=TGGT1_chrIX:1693077-1700464(+) | protein_length=1299 | sequence_SO=chromosome | SO=protein_coding_gene | is_pseudo=false	0.035	1.518	2	1	1	1	1299	139.2	5.58	3.14	1	1.306	1.513	1.273	1.378	1.228	1.151	0.996	0.792	0.537	57.8	75.5	87.4	73.5	79.6	70.9	66.5	57.5	45.7	31	High	High	High	High	High	High	High	High	High	High	1
2.13385e+18	FALSE	Medium	IsMasterProtein	TGGT1_206380-t26_1-p1	transcript=TGGT1_206380-t26_1 | gene=TGGT1_206380 | organism=Toxoplasma_gondii_GT1 | gene_product=hypothetical protein | transcript_product=hypothetical protein | location=TGGT1_chrVIIa:1008034-1018085(+) | protein_length=2455 | sequence_SO=chromosome | SO=protein_coding_gene | is_pseudo=false	0.014	2.004	0	1	1	1	2455	266.9	6.46	2.31	1	1.566	1.769	0.796	1.706	0.709	1.562	1.272	1.166	1.1	58.6	91.8	103.7	46.7	100	41.5	91.5	74.5	68.3	64.5	High	High	High	High	High	High	High	High	High	High	1
4.23342e+18	FALSE	High	IsMasterProtein	TGGT1_240050-t26_1-p1	transcript=TGGT1_240050-t26_1 | gene=TGGT1_240050 | organism=Toxoplasma_gondii_GT1 | gene_product=hypothetical protein | transcript_product=hypothetical protein | location=TGGT1_chrVI:1016340-1024919(+) | protein_length=1839 | sequence_SO=chromosome | SO=protein_coding_gene | is_pseudo=false	0.003	3.653	1	1	2	1	1839	195.7	8.57	6.56	1	1.361	1.62	1.151	1.647	0.862	0.683	0.691	0.59	0.749	58.7	79.9	95.1	67.6	96.7	50.6	40.1	40.6	34.7	44	High	High	High	High	High	High	High	High	High	High	1
-2.0275e+18	FALSE	High	IsMasterProtein	TGGT1_203300-t26_1-p1	transcript=TGGT1_203300-t26_1 | gene=TGGT1_203300 | organism=Toxoplasma_gondii_GT1 | gene_product=hypothetical protein | transcript_product=hypothetical protein | location=TGGT1_chrVIIa:2506153-2515839(+) | protein_length=1395 | sequence_SO=chromosome | SO=protein_coding_gene | is_pseudo=false	0	18.174	3	3	5	3	1395	148.9	5.6	21.01	3	1.221	1.228	0.938	5.455	0.744	0.387	0.338	0.432	0.402	59	72.1	72.5	55.4	322	43.9	22.9	20	25.5	23.7	High	High	High	High	High	High	High	High	High	High	1
-1.72923e+18	FALSE	High	IsMasterProtein	TGGT1_269620-t26_1-p1	transcript=TGGT1_269620-t26_1 | gene=TGGT1_269620 | organism=Toxoplasma_gondii_GT1 | gene_product=hypothetical protein | transcript_product=hypothetical protein | location=TGGT1_chrVIII:5739359-5741346(+) | protein_length=554 | sequence_SO=chromosome | SO=protein_coding_gene | is_pseudo=false	0.001	6.019	3	2	2	2	554	58.8	5.17	5.16	2	1.155	1.467	1.125	1.019	1.104	1.01	0.814	1.033	0.98	59.2	68.4	86.9	66.7	60.4	65.4	59.8	48.2	61.2	58	High	High	High	High	High	High	High	High	High	High	1
-1.26029e+18	FALSE	High	IsMasterProtein	TGGT1_288245-t26_1-p1	transcript=TGGT1_288245-t26_1 | gene=TGGT1_288245 | organism=Toxoplasma_gondii_GT1 | gene_product=hypothetical protein | transcript_product=hypothetical protein | location=TGGT1_chrIX:2221352-2221510(-) | protein_length=52 | sequence_SO=chromosome | SO=protein_coding_gene | is_pseudo=false	0.007	2.724	33	1	1	1	52	5.9	9.98	3.19	1	1.338	1.541	1.067	1.712	1.059	0.669	0.518	0.762	0.546	59.5	79.5	91.6	63.4	101.8	62.9	39.8	30.8	45.3	32.4	High	High	High	High	High	High	High	High	High	High	1
8.49157e+18	FALSE	High	IsMasterProtein	TGGT1_205300-t26_1-p1	transcript=TGGT1_205300-t26_1 | gene=TGGT1_205300 | organism=Toxoplasma_gondii_GT1 | gene_product=hypothetical protein | transcript_product=hypothetical protein | location=TGGT1_chrVIIa:1393031-1399070(-) | protein_length=697 | sequence_SO=chromosome | SO=protein_coding_gene | is_pseudo=false	0	12.197	6	2	4	2	697	75.2	8.06	17.44	2	1.043	1.103	0.933	0.845	0.743	0.472	0.454	0.358	0.4	59.9	62.4	66	55.9	50.6	44.5	28.2	27.2	21.4	23.9	High	High	High	High	High	High	High	High	High	High	1
4.40758e+18	FALSE	High	IsMasterProtein	TGGT1_316700-t26_1-p1	transcript=TGGT1_316700-t26_1 | gene=TGGT1_316700 | organism=Toxoplasma_gondii_GT1 | gene_product=Uridine kinase [Source:UniProtKB/TrEMBL;Acc:S7ULZ9] | transcript_product=uridine kinase | location=TGGT1_chrXI:5457266-5462108(+) | protein_length=606 | sequence_SO=chromosome | SO=protein_coding_gene | is_pseudo=false	0	7.133	2	1	1	1	606	65.2	6.23	3.28	1	1.012	1.203	0.892	0.984	0.795	0.549	0.417	0.485	0.449	60.1	60.8	72.2	53.5	59.1	47.8	33	25.1	29.1	26.9	High	High	High	High	High	High	High	High	High	High	1
-1.47928e+18	FALSE	High	IsMasterProtein	TGGT1_205360-t26_1-p1	transcript=TGGT1_205360-t26_1 | gene=TGGT1_205360 | organism=Toxoplasma_gondii_GT1 | gene_product=hypothetical protein | transcript_product=hypothetical protein | location=TGGT1_chrVIIa:1355158-1371232(+) | protein_length=2607 | sequence_SO=chromosome | SO=protein_coding_gene | is_pseudo=false	0.001	5.133	1	1	1	1	2607	293.1	7.2	2.78	1	1.208	1.45	0.922	1.025	0.739	0.409	0.41	0.495	0.444	60.6	73.2	87.9	55.9	62.1	44.8	24.8	24.9	30	26.9	High	High	High	High	High	High	High	High	High	High	1
6.47303e+17	FALSE	High	IsMasterProtein	TGGT1_222310-t26_1-p1	transcript=TGGT1_222310-t26_1 | gene=TGGT1_222310 | organism=Toxoplasma_gondii_GT1 | gene_product=DUF1084 domain-containing protein [Source:UniProtKB/TrEMBL;Acc:S7UK95] | transcript_product=hypothetical protein | location=TGGT1_chrII:1007308-1013299(+) | protein_length=536 | sequence_SO=chromosome | SO=protein_coding_gene | is_pseudo=false	0	8.264	4	1	4	1	536	58.6	7.49	16.04	1	1.107	1.305	0.937	0.994	0.775	0.528	0.594	0.47	0.44	60.8	67.3	79.3	57	60.5	47.1	32.1	36.1	28.6	26.8	High	High	High	High	High	High	High	High	High	High	1
-8.3131e+18	FALSE	High	IsMasterProtein	TGGT1_208970-t26_1-p1	transcript=TGGT1_208970-t26_1 | gene=TGGT1_208970 | organism=Toxoplasma_gondii_GT1 | gene_product=RRM domain-containing protein [Source:UniProtKB/TrEMBL;Acc:S7VS87] | transcript_product=RNA recognition motif-containing protein | location=TGGT1_chrIb:942283-944701(-) | protein_length=283 | sequence_SO=chromosome | SO=protein_coding_gene | is_pseudo=false	0.003	3.485	3	2	2	2	283	33.7	10.33	2.23	2	1.2	1.303	0.925	0.792	0.649	0.509	0.423	0.419	0.461	61.1	73.4	79.7	56.5	48.4	39.7	31.1	25.9	25.6	28.2	High	High	High	High	High	High	High	High	High	High	1
8.75411e+17	FALSE	Medium	IsMasterProtein	TGGT1_236620-t26_1-p1	transcript=TGGT1_236620-t26_1 | gene=TGGT1_236620 | organism=Toxoplasma_gondii_GT1 | gene_product=Protein kinase domain-containing protein [Source:UniProtKB/TrEMBL;Acc:S7UQM1] | transcript_product=protein kinase (incomplete catalytic triad) | location=TGGT1_chrX:5341754-5348601(+) | protein_length=556 | sequence_SO=chromosome | SO=protein_coding_gene | is_pseudo=false	0.011	2.327	2	1	2	1	556	63.2	5.91	4.72	1	1.163	1.381	0.974	1.02	0.824	0.553	0.382	0.491	0.447	61.2	71.2	84.6	59.7	62.5	50.4	33.9	23.4	30.1	27.4	High	High	High	High	High	High	High	High	High	High	1
4.12049e+18	FALSE	High	IsMasterProtein	TGGT1_273580-t26_1-p1	transcript=TGGT1_273580-t26_1 | gene=TGGT1_273580 | organism=Toxoplasma_gondii_GT1 | gene_product=DUF3510 domain-containing protein [Source:UniProtKB/TrEMBL;Acc:S7V3H1] | transcript_product=hypothetical protein | location=TGGT1_chrVIII:3363343-3379144(+) | protein_length=1423 | sequence_SO=chromosome | SO=protein_coding_gene | is_pseudo=false	0	7.203	1	2	3	2	1423	154.9	7.84	7.53	2	1.485	1.294	1.133	0.892	0.719	0.491	0.329	0.566	0.335	61.5	91.3	79.5	69.7	54.8	44.2	30.2	20.2	34.8	20.6	High	High	High	High	High	High	High	High	High	High	1
1.48303e+18	FALSE	High	IsMasterProtein	TGGT1_220880-t26_1-p1	transcript=TGGT1_220880-t26_1 | gene=TGGT1_220880 | organism=Toxoplasma_gondii_GT1 | gene_product=hypothetical protein | transcript_product=hypothetical protein | location=TGGT1_chrII:19932-22208(+) | protein_length=203 | sequence_SO=chromosome | SO=protein_coding_gene | is_pseudo=false	0	8.677	9	2	3	1	203	23.5	5.15	8.84	2	1.13	1.283	0.952	0.812	0.744	0.475	0.447	0.399	0.299	61.5	69.5	79	58.5	49.9	45.8	29.2	27.5	24.5	18.4	High	High	High	High	High	High	High	High	High	High	1
-8.53707e+18	FALSE	High	IsMasterProtein	TGGT1_279430-t26_1-p1	transcript=TGGT1_279430-t26_1 | gene=TGGT1_279430 | organism=Toxoplasma_gondii_GT1 | gene_product=Cwf18 pre-mRNA splicing factor protein [Source:UniProtKB/TrEMBL;Acc:A0A125YTW7] | transcript_product=cwf18 pre-mRNA splicing factor protein | location=TGGT1_chrIX:24452-25155(-) | protein_length=152 | sequence_SO=chromosome | SO=protein_coding_gene | is_pseudo=false	0	14.969	17	2	3	2	152	17.5	5.49	11.82	2	1.458	1.615	1.074	1.801	0.977	1.471	1.39	1.182	1.428	61.9	90.2	100	66.5	111.5	60.4	91	86	73.1	88.4	High	High	High	High	High	High	High	High	High	High	1
1.98908e+18	FALSE	High	IsMasterProtein	TGGT1_263360-t26_1-p1	transcript=TGGT1_263360-t26_1 | gene=TGGT1_263360 | organism=Toxoplasma_gondii_GT1 | gene_product=WD_REPEATS_REGION domain-containing protein [Source:UniProtKB/TrEMBL;Acc:S7UXP1] | transcript_product=WD domain, G-beta repeat-containing protein | location=TGGT1_chrVIIb:571346-585455(-) | protein_length=1581 | sequence_SO=chromosome | SO=protein_coding_gene | is_pseudo=false	0.002	4.461	1	1	2	1	1581	169.8	8.9	5.38	1	1.387	1.253	1.036	1.166	0.956	0.663	0.615	0.737	0.437	61.9	85.9	77.6	64.1	72.2	59.2	41	38	45.6	27	High	High	High	High	High	High	High	High	High	High	1
1.16263e+16	FALSE	High	IsMasterProtein	TGGT1_253380-t26_1-p1	transcript=TGGT1_253380-t26_1 | gene=TGGT1_253380 | organism=Toxoplasma_gondii_GT1 | gene_product=AP2/ERF domain-containing protein [Source:UniProtKB/TrEMBL;Acc:S7UMR8] | transcript_product=AP2 domain transcription factor AP2III-2 | location=TGGT1_chrIII:889944-894956(+) | protein_length=1670 | sequence_SO=chromosome | SO=protein_coding_gene | is_pseudo=false	0	7.047	1	1	1	1	1670	165	5.88	3.3	1	0.947	1.238	1.146	0.859	1.126	0.609	0.579	0.771	0.528	62.2	58.9	77	71.3	53.4	70.1	37.9	36	48	32.8	High	High	High	High	High	High	High	High	High	High	1
6.45935e+18	FALSE	High	IsMasterProtein	TGGT1_244350-t26_1-p1	transcript=TGGT1_244350-t26_1 | gene=TGGT1_244350 | organism=Toxoplasma_gondii_GT1 | gene_product=J domain-containing protein [Source:UniProtKB/TrEMBL;Acc:S7UFL6] | transcript_product=DnaJ domain-containing protein | location=TGGT1_chrVI:3114397-3123565(+) | protein_length=442 | sequence_SO=chromosome | SO=protein_coding_gene | is_pseudo=false	0.003	3.418	2	1	1	1	442	49.9	8.41	2.26	1	1.239	1.043	0.808	0.944	0.732	0.552	0.509	0.493	0.456	62.3	77.1	65	50.3	58.8	45.6	34.4	31.7	30.7	28.4	High	High	High	High	High	High	High	High	High	High	1
7.95828e+18	FALSE	High	IsMasterProtein	TGGT1_257500-t26_1-p1	transcript=TGGT1_257500-t26_1 | gene=TGGT1_257500 | organism=Toxoplasma_gondii_GT1 | gene_product=hypothetical protein | transcript_product=hypothetical protein | location=TGGT1_chrVIIb:3943345-3947375(+) | protein_length=1235 | sequence_SO=chromosome | SO=protein_coding_gene | is_pseudo=false	0.001	6.668	2	2	3	2	1235	133	8.41	6.55	2	1.333	1.279	0.847	0.889	0.744	0.606	0.471	0.435	0.492	62.3	83.1	79.7	52.8	55.4	46.4	37.8	29.4	27.1	30.7	High	High	High	High	High	High	High	High	High	High	1
1.75769e+17	FALSE	High	IsMasterProtein	TGGT1_309850-t26_1-p1	transcript=TGGT1_309850-t26_1 | gene=TGGT1_309850 | organism=Toxoplasma_gondii_GT1 | gene_product=Insulin-degrading enzyme [Source:UniProtKB/TrEMBL;Acc:S7UT62] | transcript_product=insulin-degrading enzyme | location=TGGT1_chrXI:803163-808754(-) | protein_length=456 | sequence_SO=chromosome | SO=protein_coding_gene | is_pseudo=false	0.005	3.05	2	1	3	1	456	52	5.44	6.75	1	1.358	1.438	0.962	1.175	0.749	0.618	0.556	0.488	0.506	62.8	85.3	90.3	60.4	73.9	47	38.8	34.9	30.6	31.8	High	High	High	High	High	High	High	High	High	High	1
5.33141e+18	FALSE	High	IsMasterProtein	TGGT1_248260-t26_1-p1	transcript=TGGT1_248260-t26_1 | gene=TGGT1_248260 | organism=Toxoplasma_gondii_GT1 | gene_product=hypothetical protein | transcript_product=hypothetical protein | location=TGGT1_chrXII:3698912-3699508(+) | protein_length=198 | sequence_SO=chromosome | SO=protein_coding_gene | is_pseudo=false	0.001	6.003	11	1	3	1	198	21.2	11.25	6.17	1	0.986	1.319	1.073	1.218	1.033	1.025	0.768	0.936	0.765	62.9	62.1	83	67.6	76.7	65	64.5	48.4	58.9	48.1	High	High	High	High	High	High	High	High	High	High	1
7.1106e+18	FALSE	High	IsMasterProtein	TGGT1_204490-t26_1-p1	transcript=TGGT1_204490-t26_1 | gene=TGGT1_204490 | organism=Toxoplasma_gondii_GT1 | gene_product=hypothetical protein | transcript_product=hypothetical protein | location=TGGT1_chrVIIa:1651032-1653481(-) | protein_length=272 | sequence_SO=chromosome | SO=protein_coding_gene | is_pseudo=false	0.001	6.857	4	1	2	1	272	31.4	10.1	7.06	1	1.165	1.071	1.153	0.992	1.085	1.019	0.913	1.064	1.065	63	73.4	67.5	72.7	62.5	68.4	64.2	57.5	67.1	67.1	High	High	High	High	High	High	High	High	High	High	1
1.10283e+18	FALSE	Medium	IsMasterProtein	TGGT1_249840-t26_1-p1	transcript=TGGT1_249840-t26_1 | gene=TGGT1_249840 | organism=Toxoplasma_gondii_GT1 | gene_product=Putative dynein heavy chain 2 [Source:UniProtKB/TrEMBL;Acc:S7V0N4] | transcript_product=putative dynein heavy chain 2 | location=TGGT1_chrXII:4786016-4835663(+) | protein_length=4140 | sequence_SO=chromosome | SO=protein_coding_gene | is_pseudo=false	0.049	1.303	0	1	1	1	4140	470.6	6.15	2.41	1	1.014	1.449	0.964	0.884	0.95	0.67	0.762	0.861	0.893	63.5	64.3	91.9	61.2	56.1	60.3	42.5	48.4	54.6	56.7	High	High	High	High	High	High	High	High	High	High	1
-5.18567e+18	FALSE	High	IsMasterProtein	TGGT1_226670-t26_1-p1	transcript=TGGT1_226670-t26_1 | gene=TGGT1_226670 | organism=Toxoplasma_gondii_GT1 | gene_product=hypothetical protein | transcript_product=hypothetical protein | location=TGGT1_chrX:1358563-1360047(-) | protein_length=494 | sequence_SO=chromosome | SO=protein_coding_gene | is_pseudo=false	0	7.545	4	2	3	2	494	51.8	7.64	7.31	2	1.313	1.236	1.024	1.059	0.872	0.876	0.809	0.839	0.772	63.5	83.3	78.4	65	67.2	55.4	55.6	51.4	53.3	49	High	High	High	High	High	High	High	High	High	High	1
-2.23857e+18	FALSE	Medium	IsMasterProtein	TGGT1_236030-t26_1-p1	transcript=TGGT1_236030-t26_1 | gene=TGGT1_236030 | organism=Toxoplasma_gondii_GT1 | gene_product=DUF775 domain-containing protein [Source:UniProtKB/TrEMBL;Acc:S7VZL8] | transcript_product=hypothetical protein | location=TGGT1_chrX:5135668-5137476(+) | protein_length=188 | sequence_SO=chromosome | SO=protein_coding_gene | is_pseudo=false	0.04	1.426	5	1	1	1	188	20.7	8.07	0	1	1.2	1.6	0.943	0.954	0.768	0.496	0.448	0.407	0.495	63.8	76.5	102.1	60.2	60.8	49	31.6	28.6	25.9	31.6	High	High	High	High	High	High	High	High	High	High	1
-6466528441323330	FALSE	Low	IsMasterProtein	TGGT1_254625-t26_1-p1	transcript=TGGT1_254625-t26_1 | gene=TGGT1_254625 | organism=Toxoplasma_gondii_GT1 | gene_product=hypothetical protein | transcript_product=hypothetical protein | location=TGGT1_chrIII:1844265-1845836(+) | protein_length=523 | sequence_SO=chromosome | SO=protein_coding_gene | is_pseudo=false	0.083	1.051	1	1	1	1	523	58.9	10.51	1.96	1	1.078	1.238	1.12	0.983	0.954	0.557	0.624	0.697	0.624	63.8	68.8	78.9	71.4	62.7	60.8	35.5	39.8	44.4	39.8	High	High	High	High	High	High	High	High	High	High	1
-2.88319e+18	FALSE	Medium	IsMasterProtein	TGGT1_212770-t26_1-p1	transcript=TGGT1_212770-t26_1 | gene=TGGT1_212770 | organism=Toxoplasma_gondii_GT1 | gene_product=hypothetical protein | transcript_product=hypothetical protein | location=TGGT1_chrV:456259-461225(-) | protein_length=940 | sequence_SO=chromosome | SO=protein_coding_gene | is_pseudo=false	0.012	2.216	1	1	2	1	940	99.8	6.74	4.78	1	1.193	1.153	1.055	0.903	0.669	0.485	0.389	0.467	0.347	63.9	76.2	73.6	67.4	57.7	42.7	31	24.8	29.8	22.1	High	High	High	High	High	High	High	High	High	High	1
-6.86114e+18	FALSE	High	IsMasterProtein	TGGT1_313150-t26_1-p1	transcript=TGGT1_313150-t26_1 | gene=TGGT1_313150 | organism=Toxoplasma_gondii_GT1 | gene_product=Sugar phosphate phosphatase [Source:UniProtKB/TrEMBL;Acc:S7UTJ0] | transcript_product=DUF89/Fructose bisphosphatase | location=TGGT1_chrXI:3102924-3106015(-) | protein_length=551 | sequence_SO=chromosome | SO=protein_coding_gene | is_pseudo=false	0.006	2.787	1	1	1	1	551	61.9	5.54	1.76	1	1.051	1.246	0.766	0.914	0.712	0.491	0.351	0.368	0.388	63.9	67.1	79.6	48.9	58.4	45.5	31.4	22.4	23.5	24.8	High	High	High	High	High	High	High	High	High	High	1
-6.98567e+18	FALSE	High	IsMasterProtein	TGGT1_255330-t26_1-p1	transcript=TGGT1_255330-t26_1 | gene=TGGT1_255330 | organism=Toxoplasma_gondii_GT1 | gene_product=hypothetical protein | transcript_product=hypothetical protein | location=TGGT1_chrVIIb:4806660-4808322(+) | protein_length=327 | sequence_SO=chromosome | SO=protein_coding_gene | is_pseudo=false	0.002	4.019	3	1	2	1	327	34.9	6.95	5.53	1	0.975	1.188	1.062	0.972	1.05	0.863	0.817	0.917	0.816	64	62.4	76	67.9	62.2	67.2	55.2	52.3	58.7	52.2	High	High	High	High	High	High	High	High	High	High	1
3.3572e+17	FALSE	High	IsMasterProtein	TGGT1_207400-t26_1-p1	transcript=TGGT1_207400-t26_1 | gene=TGGT1_207400 | organism=Toxoplasma_gondii_GT1 | gene_product=hypothetical protein | transcript_product=hypothetical protein | location=TGGT1_chrIb:44154-48075(+) | protein_length=436 | sequence_SO=chromosome | SO=protein_coding_gene | is_pseudo=false	0	8.318	7	2	2	2	436	49.4	5.73	7.42	2	1.346	1.519	0.928	1.328	1.134	0.879	0.75	0.598	0.454	64.1	86.3	97.4	59.5	85.1	72.7	56.4	48.1	38.4	29.1	High	High	High	High	High	High	High	High	High	High	1
5.6531e+16	FALSE	High	IsMasterProtein	TGGT1_216960-t26_1-p1	transcript=TGGT1_216960-t26_1 | gene=TGGT1_216960 | organism=Toxoplasma_gondii_GT1 | gene_product=Tr-type G domain-containing protein [Source:UniProtKB/TrEMBL;Acc:S7VUQ4] | transcript_product=elongation factor Tu GTP binding domain-containing protein | location=TGGT1_chrXI:5687605-5695433(-) | protein_length=863 | sequence_SO=chromosome | SO=protein_coding_gene | is_pseudo=false	0.003	3.983	1	1	1	1	863	92	8.24	2.3	1	1.025	1.32	1.053	0.719	0.608	0.407	0.428	0.402	0.335	64.1	65.7	84.6	67.5	46.1	39	26.1	27.4	25.8	21.5	High	High	High	High	High	High	High	High	High	High	1
5.06408e+18	FALSE	High	IsMasterProtein	TGGT1_297160-t26_1-p1	transcript=TGGT1_297160-t26_1 | gene=TGGT1_297160 | organism=Toxoplasma_gondii_GT1 | gene_product=hypothetical protein | transcript_product=hypothetical protein | location=TGGT1_chrII:1555497-1559368(-) | protein_length=564 | sequence_SO=chromosome | SO=protein_coding_gene | is_pseudo=false	0	7.271	4	1	1	1	564	60.6	8.4	4.41	1	1.138	1.319	0.915	0.93	0.819	0.597	0.428	0.426	0.439	64.2	73	84.7	58.8	59.7	52.6	38.3	27.5	27.3	28.2	High	High	High	High	High	High	High	High	High	High	1
6.78396e+18	FALSE	High	IsMasterProtein	TGGT1_246460-t26_1-p1	transcript=TGGT1_246460-t26_1 | gene=TGGT1_246460 | organism=Toxoplasma_gondii_GT1 | gene_product=hypothetical protein | transcript_product=hypothetical protein | location=TGGT1_chrXII:2716581-2719461(+) | protein_length=634 | sequence_SO=chromosome | SO=protein_coding_gene | is_pseudo=false	0	9.105	3	1	2	1	634	68.6	5.34	10.36	1	1.085	0.957	0.838	0.925	0.501	0.402	0.522	0.384	0.271	64.4	69.9	61.7	54	59.6	32.3	25.9	33.6	24.7	17.4	High	High	High	High	High	High	High	High	High	High	1
-3.39292e+18	FALSE	High	IsMasterProtein	TGGT1_230100-t26_1-p1	transcript=TGGT1_230100-t26_1 | gene=TGGT1_230100 | organism=Toxoplasma_gondii_GT1 | gene_product=Putative membrane protein [Source:UniProtKB/TrEMBL;Acc:A0A125YFJ9] | transcript_product=putative membrane protein | location=TGGT1_chrVIII:596923-601206(+) | protein_length=286 | sequence_SO=chromosome | SO=protein_coding_gene | is_pseudo=false	0	12.772	12	3	4	3	286	32.1	7.5	10.87	3	1.131	1.338	1.008	0.964	0.695	0.706	0.684	0.61	0.447	64.4	72.9	86.2	64.9	62.1	44.7	45.5	44.1	39.3	28.8	High	High	High	High	High	High	High	High	High	High	1
-6.52316e+18	FALSE	High	IsMasterProtein	TGGT1_289630-t26_1-p1	transcript=TGGT1_289630-t26_1 | gene=TGGT1_289630 | organism=Toxoplasma_gondii_GT1 | gene_product=Microneme protein MIC16 [Source:UniProtKB/TrEMBL;Acc:A0A125YI60] | transcript_product=microneme protein MIC16 | location=TGGT1_chrIX:3165947-3170340(+) | protein_length=668 | sequence_SO=chromosome | SO=protein_coding_gene | is_pseudo=false	0.003	3.968	2	1	1	1	668	74.5	7.58	2.25	1	1.219	1.255	0.847	1.112	1.106	0.87	0.718	0.694	0.822	64.6	78.8	81.1	54.7	71.9	71.5	56.2	46.4	44.8	53.1	High	High	High	High	High	High	High	High	High	High	1
-6.14862e+18	FALSE	High	IsMasterProtein	TGGT1_226640-t26_1-p1	transcript=TGGT1_226640-t26_1 | gene=TGGT1_226640 | organism=Toxoplasma_gondii_GT1 | gene_product=Protein yippee-like [Source:UniProtKB/TrEMBL;Acc:A0A125YHN7] | transcript_product=putative zinc binding protein | location=TGGT1_chrX:1385243-1387819(-) | protein_length=130 | sequence_SO=chromosome | SO=protein_coding_gene | is_pseudo=false	0.001	6.145	16	2	2	2	130	14.7	6.89	2.73	2	1.081	1.179	0.959	0.655	0.884	0.414	0.452	0.422	0.402	64.6	69.9	76.2	62	42.3	57.2	26.8	29.2	27.3	26	High	High	High	High	High	High	High	High	High	High	1
2.31486e+18	FALSE	High	IsMasterProtein	TGGT1_224800-t26_1-p1	transcript=TGGT1_224800-t26_1 | gene=TGGT1_224800 | organism=Toxoplasma_gondii_GT1 | gene_product=hypothetical protein | transcript_product=hypothetical protein | location=TGGT1_chrX:2734782-2736098(-) | protein_length=294 | sequence_SO=chromosome | SO=protein_coding_gene | is_pseudo=false	0.006	2.822	3	1	1	1	294	33.8	9.09	2.54	1	1.152	1.167	0.96	0.806	0.727	0.438	0.424	0.401	0.364	64.8	74.7	75.7	62.3	52.3	47.1	28.4	27.5	26	23.6	High	High	High	High	High	High	High	High	High	High	1
-7.57831e+18	FALSE	High	IsMasterProtein	TGGT1_212990-t26_1-p1	transcript=TGGT1_212990-t26_1 | gene=TGGT1_212990 | organism=Toxoplasma_gondii_GT1 | gene_product=hypothetical protein | transcript_product=hypothetical protein | location=TGGT1_chrV:626448-635544(+) | protein_length=1064 | sequence_SO=chromosome | SO=protein_coding_gene | is_pseudo=false	0.002	4.382	1	1	1	1	1064	113.6	8.4	3.36	1	1.081	1.331	0.895	0.97	0.793	0.677	0.487	0.513	0.516	65	70.3	86.6	58.2	63.1	51.6	44	31.6	33.4	33.6	High	High	High	High	High	High	High	High	High	High	1
-4.4348e+18	FALSE	High	IsMasterProtein	TGGT1_210270-t26_1-p1	transcript=TGGT1_210270-t26_1 | gene=TGGT1_210270 | organism=Toxoplasma_gondii_GT1 | gene_product=hypothetical protein | transcript_product=hypothetical protein | location=TGGT1_chrIX:4700324-4707522(+) | protein_length=2051 | sequence_SO=chromosome | SO=protein_coding_gene | is_pseudo=false	0	15.228	2	2	2	2	2051	226.7	5.19	10.3	2	1.27	1.502	1.104	1.102	1.002	0.741	0.736	0.712	0.679	65	82.6	97.7	71.8	71.7	65.2	48.2	47.9	46.3	44.2	High	High	High	High	High	High	High	High	High	High	1
-4.21289e+18	FALSE	High	IsMasterProtein	TGGT1_221200A-t26_1-p1	transcript=TGGT1_221200A-t26_1 | gene=TGGT1_221200A | organism=Toxoplasma_gondii_GT1 | gene_product=CW-type Zinc Finger protein [Source:UniProtKB/TrEMBL;Acc:S7ULE9] | transcript_product=CW-type Zinc Finger protein | location=TGGT1_chrII:107067-114345(-) | protein_length=1525 | sequence_SO=chromosome | SO=protein_coding_gene | is_pseudo=false	0	25.563	4	5	8	3	1525	163	4.78	16.35	5	1.225	1.362	0.937	1.011	0.816	0.677	0.76	0.687	0.634	65.2	79.8	88.7	61.1	65.8	53.2	44.1	49.5	44.7	41.3	High	High	High	High	High	High	High	High	High	High	1
1.18508e+18	FALSE	High	IsMasterProtein	TGGT1_222050-t26_1-p1	transcript=TGGT1_222050-t26_1 | gene=TGGT1_222050 | organism=Toxoplasma_gondii_GT1 | gene_product=hypothetical protein | transcript_product=hypothetical protein | location=TGGT1_chrII:769157-774451(-) | protein_length=1477 | sequence_SO=chromosome | SO=protein_coding_gene | is_pseudo=false	0.001	4.804	3	3	4	3	1477	155.8	6.1	7.94	3	1.18	1.399	1.085	0.984	0.879	0.727	0.624	0.671	0.621	65.7	77.5	91.9	71.3	64.6	57.7	47.8	41	44.1	40.8	High	High	High	High	High	High	High	High	High	High	1
-2.33419e+18	FALSE	High	IsMasterProtein	TGGT1_289560-t26_1-p1	transcript=TGGT1_289560-t26_1 | gene=TGGT1_289560 | organism=Toxoplasma_gondii_GT1 | gene_product=Nuclear cap-binding protein subunit 2 [Source:UniProtKB/TrEMBL;Acc:A0A125YFB1] | transcript_product=RNA recognition motif-containing protein | location=TGGT1_chrIX:3112269-3114540(+) | protein_length=282 | sequence_SO=chromosome | SO=protein_coding_gene | is_pseudo=false	0	7.432	5	1	1	1	282	30.6	9.61	3.22	1	1.156	1.428	0.653	0.92	0.369	0.273	0.257	0.161	0.188	65.7	75.9	93.8	42.9	60.4	24.2	17.9	16.9	10.6	12.3	High	High	High	High	High	High	High	High	High	High	1
6.47997e+18	FALSE	High	IsMasterProtein	TGGT1_217870-t26_1-p1	transcript=TGGT1_217870-t26_1 | gene=TGGT1_217870 | organism=Toxoplasma_gondii_GT1 | gene_product=Palmitoyltransferase [Source:UniProtKB/TrEMBL;Acc:A0A125YQG5] | transcript_product=DHHC zinc finger domain-containing protein | location=TGGT1_chrXII:2131811-2136213(-) | protein_length=430 | sequence_SO=chromosome | SO=protein_coding_gene | is_pseudo=false	0.002	4.094	3	1	2	1	430	47.1	5.8	4.79	1	1.278	1.253	1.036	0.902	0.783	0.679	0.54	0.623	0.561	65.8	84.1	82.5	68.2	59.4	51.5	44.7	35.5	41	36.9	High	High	High	High	High	High	High	High	High	High	1
-4.09969e+18	FALSE	Medium	IsMasterProtein	TGGT1_263320-t26_1-p1	transcript=TGGT1_263320-t26_1 | gene=TGGT1_263320 | organism=Toxoplasma_gondii_GT1 | gene_product=hypothetical protein | transcript_product=hypothetical protein | location=TGGT1_chrVIIb:613192-614403(-) | protein_length=403 | sequence_SO=chromosome | SO=protein_coding_gene | is_pseudo=false	0.047	1.317	2	1	1	1	403	42.1	12.21	2.44	1	1.062	1.278	0.876	0.754	0.782	0.656	0.604	0.623	0.628	66.2	70.3	84.6	58	49.9	51.8	43.4	40	41.2	41.6	High	High	High	High	High	High	High	High	High	High	1
-5.80712e+17	FALSE	Medium	IsMasterProtein	TGGT1_206640-t26_1-p1	transcript=TGGT1_206640-t26_1 | gene=TGGT1_206640 | organism=Toxoplasma_gondii_GT1 | gene_product=hypothetical protein | transcript_product=hypothetical protein | location=TGGT1_chrVIIa:732834-742091(+) | protein_length=1282 | sequence_SO=chromosome | SO=protein_coding_gene | is_pseudo=false	0.012	2.221	1	1	1	1	1282	144	5.55	1.94	1	1.188	1.338	0.92	1.193	0.74	0.876	0.832	0.756	0.713	66.4	78.9	88.8	61.1	79.2	49.1	58.2	55.3	50.2	47.4	High	High	High	High	High	High	High	High	High	High	1
6.50447e+18	FALSE	High	IsMasterProtein	TGGT1_313340-t26_1-p1	transcript=TGGT1_313340-t26_1 | gene=TGGT1_313340 | organism=Toxoplasma_gondii_GT1 | gene_product=hypothetical protein | transcript_product=hypothetical protein | location=TGGT1_chrXI:3246107-3255996(-) | protein_length=1444 | sequence_SO=chromosome | SO=protein_coding_gene | is_pseudo=false	0.002	4.364	2	2	2	2	1444	161	6.54	7.47	2	1.181	1.376	0.9	1.102	1.048	1.052	1.007	1.03	1.073	66.5	78.5	91.5	59.9	73.3	69.7	70	67	68.5	71.4	High	High	High	High	High	High	High	High	High	High	1	Phospho [S536]
-7.83517e+18	FALSE	High	IsMasterProtein	TGGT1_241880-t26_1-p1	transcript=TGGT1_241880-t26_1 | gene=TGGT1_241880 | organism=Toxoplasma_gondii_GT1 | gene_product=Phosphodiesterase [Source:UniProtKB/TrEMBL;Acc:S7USB2] | transcript_product=3'5'-cyclic nucleotide phosphodiesterase domain-containing protein | location=TGGT1_chrVI:1724772-1737127(-) | protein_length=1281 | sequence_SO=chromosome | SO=protein_coding_gene | is_pseudo=false	0.002	4.212	1	1	2	1	1281	142.4	6.9	4.68	1	1.079	1.18	0.826	0.818	0.688	0.442	0.372	0.404	0.384	66.6	71.8	78.5	55	54.4	45.8	29.4	24.8	26.9	25.6	High	High	High	High	High	High	High	High	High	High	1
6.08844e+18	FALSE	Low	IsMasterProtein	TGGT1_252250-t26_1-p1	transcript=TGGT1_252250-t26_1 | gene=TGGT1_252250 | organism=Toxoplasma_gondii_GT1 | gene_product=AAA domain-containing protein [Source:UniProtKB/TrEMBL;Acc:S7UMH8] | transcript_product=ATPase, AAA family protein | location=TGGT1_chrIII:404085-410159(-) | protein_length=1299 | sequence_SO=chromosome | SO=protein_coding_gene | is_pseudo=false	0.057	1.23	1	1	2	1	1299	141.2	8.37	4.93	1	1.408	1.269	0.982	1.451	0.841	0.486	0.475	0.521	0.576	66.6	93.8	84.5	65.4	96.7	56	32.4	31.7	34.7	38.4	High	High	High	High	High	High	High	High	High	High	1
-5.25581e+18	FALSE	Medium	IsMasterProtein	TGGT1_278030-t26_1-p1	transcript=TGGT1_278030-t26_1 | gene=TGGT1_278030 | organism=Toxoplasma_gondii_GT1 | gene_product=hypothetical protein | transcript_product=hypothetical protein | location=TGGT1_chrXII:6257076-6266408(+) | protein_length=2220 | sequence_SO=chromosome | SO=protein_coding_gene | is_pseudo=false	0.011	2.325	0	1	1	1	2220	243.3	7.49	2.4	1	1.119	1.256	0.953	0.695	0.616	0.469	0.402	0.398	0.313	66.6	74.5	83.7	63.5	46.3	41.1	31.2	26.8	26.5	20.9	High	High	High	High	High	High	High	High	High	High	1
-8.75516e+18	FALSE	Low	IsMasterProtein	TGGT1_257020-t26_1-p1	transcript=TGGT1_257020-t26_1 | gene=TGGT1_257020 | organism=Toxoplasma_gondii_GT1 | gene_product=hypothetical protein | transcript_product=hypothetical protein | location=TGGT1_chrVIIb:4210014-4214348(-) | protein_length=404 | sequence_SO=chromosome | SO=protein_coding_gene | is_pseudo=false	0.051	1.292	2	1	1	1	404	44.6	5.8	2.56	1	1.35	1.781	1.053	1.216	0.859	0.663	0.64	0.654	0.653	66.8	90.2	119.1	70.4	81.3	57.4	44.3	42.8	43.7	43.6	High	High	High	High	High	High	High	High	High	High	1
1.19911e+18	FALSE	High	IsMasterProtein	TGGT1_263440-t26_1-p1	transcript=TGGT1_263440-t26_1 | gene=TGGT1_263440 | organism=Toxoplasma_gondii_GT1 | gene_product=hypothetical protein | transcript_product=hypothetical protein | location=TGGT1_chrVIIb:523665-529194(-) | protein_length=600 | sequence_SO=chromosome | SO=protein_coding_gene | is_pseudo=false	0	9.359	6	2	2	2	600	66.5	9.96	7.7	2	1.341	1.45	1.096	1.066	0.79	0.887	0.751	0.78	0.713	66.9	89.7	97	73.3	71.3	52.8	59.3	50.2	52.2	47.7	High	High	High	High	High	High	High	High	High	High	1
-5.64153e+18	FALSE	High	IsMasterProtein	TGGT1_281520-t26_1-p1	transcript=TGGT1_281520-t26_1 | gene=TGGT1_281520 | organism=Toxoplasma_gondii_GT1 | gene_product=RING-type domain-containing protein [Source:UniProtKB/TrEMBL;Acc:S7UW58] | transcript_product=zinc finger, C3HC4 type (RING finger) domain-containing protein | location=TGGT1_chrVIIa:4068477-4073451(-) | protein_length=369 | sequence_SO=chromosome | SO=protein_coding_gene | is_pseudo=false	0	13.092	6	1	2	1	369	41	5.3	10.44	1	1.3	1.431	1.094	1.018	0.833	0.67	0.563	0.497	0.474	67.1	87.2	96	73.4	68.3	55.9	44.9	37.7	33.3	31.8	High	High	High	High	High	High	High	High	High	High	1
6.61944e+18	FALSE	High	IsMasterProtein	TGGT1_256820-t26_1-p1	transcript=TGGT1_256820-t26_1 | gene=TGGT1_256820 | organism=Toxoplasma_gondii_GT1 | gene_product=C3H1-type domain-containing protein [Source:UniProtKB/TrEMBL;Acc:S7UZD5] | transcript_product=zinc finger (CCCH type) motif-containing protein | location=TGGT1_chrVIIb:4363987-4371101(+) | protein_length=561 | sequence_SO=chromosome | SO=protein_coding_gene | is_pseudo=false	0.001	5.487	2	1	1	1	561	60.4	7.27	3.37	1	1.125	1.394	0.93	0.973	0.774	0.422	0.296	0.379	0.429	67.1	75.4	93.5	62.4	65.2	51.9	28.3	19.8	25.4	28.7	High	High	High	High	High	High	High	High	High	High	1
8.34238e+18	FALSE	High	IsMasterProtein	TGGT1_307000-t26_1-p1	transcript=TGGT1_307000-t26_1 | gene=TGGT1_307000 | organism=Toxoplasma_gondii_GT1 | gene_product=hypothetical protein | transcript_product=hypothetical protein | location=TGGT1_chrXI:110890-113029(-) | protein_length=306 | sequence_SO=chromosome | SO=protein_coding_gene | is_pseudo=false	0.003	3.797	3	1	3	1	306	35.7	11.05	5.05	1	1.144	1.517	1.067	1.219	1.038	0.799	0.805	0.837	0.857	67.2	76.8	101.9	71.7	81.9	69.7	53.7	54.1	56.2	57.6	High	High	High	High	High	High	High	High	High	High	1
-7.32623e+18	FALSE	High	IsMasterProtein	TGGT1_214780-t26_1-p1	transcript=TGGT1_214780-t26_1 | gene=TGGT1_214780 | organism=Toxoplasma_gondii_GT1 | gene_product=Nudix hydrolase domain-containing protein [Source:UniProtKB/TrEMBL;Acc:S7VZD7] | transcript_product=hydrolase, NUDIX family protein | location=TGGT1_chrX:6381449-6384378(-) | protein_length=220 | sequence_SO=chromosome | SO=protein_coding_gene | is_pseudo=false	0	9.027	8	1	1	1	220	25.2	6.54	5.15	1	1.475	1.668	1.181	1.365	1.074	0.865	0.744	0.611	0.571	67.6	99.7	112.7	79.8	92.2	72.6	58.5	50.3	41.3	38.6	High	High	High	High	High	High	High	High	High	High	1
-3.76034e+17	FALSE	High	IsMasterProtein	TGGT1_318210-t26_1-p1	transcript=TGGT1_318210-t26_1 | gene=TGGT1_318210 | organism=Toxoplasma_gondii_GT1 | gene_product=hypothetical protein | transcript_product=hypothetical protein | location=TGGT1_chrIV:1423684-1427283(-) | protein_length=1199 | sequence_SO=chromosome | SO=protein_coding_gene | is_pseudo=false	0.001	5.645	3	2	2	2	1199	126.5	5.2	5.48	2	1.013	1.335	2.093	0.908	0.735	0.61	0.475	0.509	0.511	68.1	69	90.9	142.6	61.9	50	41.5	32.4	34.7	34.8	High	High	High	High	High	High	High	High	High	High	1
-3.34757e+17	FALSE	Medium	IsMasterProtein	TGGT1_319880-t26_1-p1	transcript=TGGT1_319880-t26_1 | gene=TGGT1_319880 | organism=Toxoplasma_gondii_GT1 | gene_product=MORN repeat-containing protein [Source:UniProtKB/TrEMBL;Acc:S7VYR6] | transcript_product=MORN repeat-containing protein | location=TGGT1_chrIV:642636-655529(+) | protein_length=1872 | sequence_SO=chromosome | SO=protein_coding_gene | is_pseudo=false	0.032	1.56	1	1	1	1	1872	203.4	5.94	1.75	1	1.169	1.28	1.092	0.88	0.75	0.642	0.523	0.46	0.436	68.2	79.7	87.3	74.5	60	51.1	43.8	35.7	31.4	29.8	High	High	High	High	High	High	High	High	High	High	1
1.3048e+18	FALSE	High	IsMasterProtein	TGGT1_313280-t26_1-p1	transcript=TGGT1_313280-t26_1 | gene=TGGT1_313280 | organism=Toxoplasma_gondii_GT1 | gene_product=Probable cytosolic iron-sulfur protein assembly protein CIAO1 homolog [Source:UniProtKB/TrEMBL;Acc:S7W1H9] | transcript_product=WD domain, G-beta repeat-containing protein | location=TGGT1_chrXI:3199515-3206768(+) | protein_length=793 | sequence_SO=chromosome | SO=protein_coding_gene | is_pseudo=false	0	17.942	6	3	5	3	793	86.5	5.53	17.6	3	1.304	1.475	0.917	1.055	0.881	0.591	0.583	0.536	0.439	68.2	89	100.7	62.6	72	60.1	40.3	39.8	36.5	30	High	High	High	High	High	High	High	High	High	High	1
-4.84996e+18	FALSE	High	IsMasterProtein	TGGT1_278370-t26_1-p1	transcript=TGGT1_278370-t26_1 | gene=TGGT1_278370 | organism=Toxoplasma_gondii_GT1 | gene_product=Toxoplasma gondii family A protein [Source:UniProtKB/TrEMBL;Acc:S7V026] | transcript_product=Toxoplasma gondii family A protein | location=TGGT1_chrXII:6046736-6047821(-) | protein_length=361 | sequence_SO=chromosome | SO=protein_coding_gene | is_pseudo=false	0	56.829	24	5	13	1	361	37.7	4.54	57.7	5	1.178	1.66	0.804	1.128	1.058	1.12	0.958	0.978	1.223	68.4	80.6	113.6	55	77.2	72.4	76.7	65.6	66.9	83.7	High	High	High	High	High	High	High	High	High	High	1
5.01041e+18	FALSE	High	IsMasterProtein	TGGT1_315710-t26_1-p1	transcript=TGGT1_315710-t26_1 | gene=TGGT1_315710 | organism=Toxoplasma_gondii_GT1 | gene_product=hypothetical protein | transcript_product=hypothetical protein | location=TGGT1_chrXI:4864287-4867368(+) | protein_length=261 | sequence_SO=chromosome | SO=protein_coding_gene | is_pseudo=false	0.001	5.916	5	1	1	1	261	28.6	9.33	3.91	1	1.188	1.556	0.974	0.966	0.979	0.634	0.509	0.563	0.628	68.5	81.4	106.6	66.8	66.2	67.1	43.4	34.9	38.6	43.1	High	High	High	High	High	High	High	High	High	High	1
9.20474e+18	FALSE	Medium	IsMasterProtein	TGGT1_246970-t26_1-p1	transcript=TGGT1_246970-t26_1 | gene=TGGT1_246970 | organism=Toxoplasma_gondii_GT1 | gene_product=HRDC domain-containing protein [Source:UniProtKB/TrEMBL;Acc:S7WH19] | transcript_product=3'-5' exonuclease domain-containing protein | location=TGGT1_chrXII:2974590-2984891(-) | protein_length=1353 | sequence_SO=chromosome | SO=protein_coding_gene | is_pseudo=false	0.034	1.532	1	1	1	1	1353	145.8	6.43	2.12	1	1.258	1.058	0.722	0.745	0.442	0.594	0.522	0.456	0.314	68.8	86.5	72.8	49.6	51.2	30.4	40.9	35.9	31.4	21.6	High	High	High	High	High	High	High	High	High	High	1
6.41827e+18	FALSE	High	IsMasterProtein	TGGT1_248110-t26_1-p1	transcript=TGGT1_248110-t26_1 | gene=TGGT1_248110 | organism=Toxoplasma_gondii_GT1 | gene_product=hypothetical protein | transcript_product=hypothetical protein | location=TGGT1_chrXII:3594425-3597355(-) | protein_length=493 | sequence_SO=chromosome | SO=protein_coding_gene | is_pseudo=false	0	8.747	5	2	4	2	493	53.7	5.08	10.87	2	1.123	1.236	0.597	0.922	0.674	0.482	0.416	0.311	0.384	69.2	77.7	85.6	41.3	63.8	46.7	33.4	28.8	21.5	26.6	High	High	High	High	High	High	High	High	High	High	1
-9.13274e+18	FALSE	High	IsMasterProtein	TGGT1_209000-t26_1-p1	transcript=TGGT1_209000-t26_1 | gene=TGGT1_209000 | organism=Toxoplasma_gondii_GT1 | gene_product=HECT-domain (Ubiquitin-transferase) domain-containing protein [Source:UniProtKB/TrEMBL;Acc:S7UJI8] | transcript_product=HECT-domain (ubiquitin-transferase) domain-containing protein | location=TGGT1_chrIb:956370-995183(-) | protein_length=12302 | sequence_SO=chromosome | SO=protein_coding_gene | is_p…	0.006	2.875	0	1	1	1	12302	1311.2	7.09	2.54	1	1.06	1.022	0.879	0.797	0.646	0.484	0.451	0.409	0.366	69.3	73.5	70.8	60.9	55.2	44.8	33.6	31.3	28.3	25.4	High	High	High	High	High	High	High	High	High	High	1
2.15662e+18	FALSE	Medium	IsMasterProtein	TGGT1_204070-t26_1-p1	transcript=TGGT1_204070-t26_1 | gene=TGGT1_204070 | organism=Toxoplasma_gondii_GT1 | gene_product=YTH domain-containing protein [Source:UniProtKB/TrEMBL;Acc:S7UUV0] | transcript_product=YT521-B family protein | location=TGGT1_chrVIIa:1914309-1920183(-) | protein_length=496 | sequence_SO=chromosome | SO=protein_coding_gene | is_pseudo=false	0.013	2.099	2	1	1	1	496	54.2	5.11	2.59	1	1.144	1.397	0.992	0.86	0.747	0.528	0.545	0.535	0.525	69.7	79.7	97.4	69.2	60	52.1	36.8	38	37.3	36.6	High	High	High	High	High	High	High	High	High	High	1
4.60076e+18	FALSE	High	IsMasterProtein	TGGT1_234490-t26_1-p1	transcript=TGGT1_234490-t26_1 | gene=TGGT1_234490 | organism=Toxoplasma_gondii_GT1 | gene_product=SAM_MT_TRM5_TYW2 domain-containing protein [Source:UniProtKB/TrEMBL;Acc:S7UVU6] | transcript_product=kelch repeat-containing protein | location=TGGT1_chrX:4310058-4317471(+) | protein_length=1503 | sequence_SO=chromosome | SO=protein_coding_gene | is_pseudo=false	0	7.685	1	1	1	1	1503	164.1	7.59	3.51	1	1.233	1.406	0.801	0.671	0.646	0.481	0.328	0.345	0.452	69.9	86.2	98.3	56	46.9	45.1	33.6	22.9	24.1	31.6	High	High	High	High	High	High	High	High	High	High	1
-1.75826e+18	FALSE	Medium	IsMasterProtein	TGGT1_254150-t26_1-p1	transcript=TGGT1_254150-t26_1 | gene=TGGT1_254150 | organism=Toxoplasma_gondii_GT1 | gene_product=hypothetical protein | transcript_product=hypothetical protein | location=TGGT1_chrIII:1455004-1457943(-) | protein_length=719 | sequence_SO=chromosome | SO=protein_coding_gene | is_pseudo=false	0.028	1.671	1	1	3	1	719	79.6	8.63	3.44	1	1.113	1.191	0.804	0.829	0.398	0.352	0.361	0.363	0.331	70.4	78.4	83.9	56.6	58.3	28	24.8	25.4	25.5	23.3	High	High	High	High	High	High	High	High	High	High	1
7.53172e+18	FALSE	High	IsMasterProtein	TGGT1_222870-t26_1-p1	transcript=TGGT1_222870-t26_1 | gene=TGGT1_222870 | organism=Toxoplasma_gondii_GT1 | gene_product=hypothetical protein | transcript_product=hypothetical protein | location=TGGT1_chrII:1254226-1256064(+) | protein_length=182 | sequence_SO=chromosome | SO=protein_coding_gene | is_pseudo=false	0.005	2.911	6	1	1	1	182	19.8	5.4	2.01	1	1.114	1.255	0.867	0.912	0.706	0.646	0.553	0.475	0.391	71	79.1	89.1	61.6	64.8	50.1	45.9	39.3	33.8	27.7	High	High	High	High	High	High	High	High	High	High	1
6.32782e+17	FALSE	High	IsMasterProtein	TGGT1_278730-t26_1-p1	transcript=TGGT1_278730-t26_1 | gene=TGGT1_278730 | organism=Toxoplasma_gondii_GT1 | gene_product=Putative guanine nucleotide-binding protein [Source:UniProtKB/TrEMBL;Acc:S7UZP5] | transcript_product=putative guanine nucleotide-binding protein | location=TGGT1_chrXII:5829849-5835007(+) | protein_length=705 | sequence_SO=chromosome | SO=protein_coding_gene | is_pseudo=false	0.001	4.505	3	2	2	2	705	76.8	5.85	4.74	2	1.142	1.474	0.905	1.046	1.018	0.695	0.696	0.595	0.54	71.1	81.2	104.8	64.3	74.3	72.3	49.4	49.4	42.3	38.4	High	High	High	High	High	High	High	High	High	High	1
-6.66377e+18	FALSE	High	IsMasterProtein	TGGT1_320120-t26_1-p1	transcript=TGGT1_320120-t26_1 | gene=TGGT1_320120 | organism=Toxoplasma_gondii_GT1 | gene_product=HIT domain-containing protein [Source:UniProtKB/TrEMBL;Acc:A0A125YWX1] | transcript_product=diadenosine tetraphosphatase family protein | location=TGGT1_chrIV:426737-428308(+) | protein_length=228 | sequence_SO=chromosome | SO=protein_coding_gene | is_pseudo=false	0.003	3.506	5	1	1	1	228	25.4	8.76	2.67	1	1.188	1.236	0.917	0.888	0.936	0.712	0.55	0.554	0.499	71.2	84.5	88	65.3	63.2	66.6	50.7	39.2	39.4	35.5	High	High	High	High	High	High	High	High	High	High	1
8.75404e+18	FALSE	High	IsMasterProtein	TGGT1_309960B-t26_1-p1	transcript=TGGT1_309960B-t26_1 | gene=TGGT1_309960B | organism=Toxoplasma_gondii_GT1 | gene_product=hypothetical protein | transcript_product=hypothetical protein | location=TGGT1_chrXI:902600-904017(+) | protein_length=319 | sequence_SO=chromosome | SO=protein_coding_gene | is_pseudo=false	0.005	2.901	3	1	2	1	319	35.4	5.47	5.45	1	1.202	1.393	0.857	0.873	0.734	0.346	0.304	0.331	0.365	71.3	85.7	99.3	61.1	62.2	52.3	24.7	21.7	23.6	26	High	High	High	High	High	High	High	High	High	High	1
1.89017e+18	FALSE	High	IsMasterProtein	TGGT1_316100-t26_1-p1	transcript=TGGT1_316100-t26_1 | gene=TGGT1_316100 | organism=Toxoplasma_gondii_GT1 | gene_product=Queuine trna-ribosyltransferase domain-containing protein [Source:UniProtKB/TrEMBL;Acc:S7UMD8] | transcript_product=queuine trna-ribosyltransferase domain-containing protein | location=TGGT1_chrXI:5071625-5076964(+) | protein_length=762 | sequence_SO=chromosome | SO=protein_coding_gene | is_pseudo=fa…	0	8.462	2	1	2	1	762	82.7	6.83	9.09	1	1.203	1.463	1.098	1.015	0.83	0.719	0.611	0.624	0.439	71.4	85.9	104.4	78.4	72.5	59.3	51.3	43.6	44.5	31.4	High	High	High	High	High	High	High	High	High	High	1
7.63545e+18	FALSE	High	IsMasterProtein	TGGT1_292160-t26_1-p1	transcript=TGGT1_292160-t26_1 | gene=TGGT1_292160 | organism=Toxoplasma_gondii_GT1 | gene_product=Rtf2 domain-containing protein [Source:UniProtKB/TrEMBL;Acc:S7UQ22] | transcript_product=hypothetical protein | location=TGGT1_chrIX:4390324-4391829(-) | protein_length=349 | sequence_SO=chromosome | SO=protein_coding_gene | is_pseudo=false	0.003	3.341	2	1	2	1	349	37.2	9.26	1.98	1	1.331	1.688	1.114	1.076	0.998	0.791	0.602	0.581	0.674	71.5	95.2	120.6	79.6	76.9	71.3	56.5	43	41.5	48.2	High	High	High	High	High	High	High	High	High	High	1
-4.62319e+18	FALSE	High	IsMasterProtein	TGGT1_270640-t26_1-p1	transcript=TGGT1_270640-t26_1 | gene=TGGT1_270640 | organism=Toxoplasma_gondii_GT1 | gene_product=RRM domain-containing protein [Source:UniProtKB/TrEMBL;Acc:A0A125YWZ3] | transcript_product=RNA recognition motif-containing protein | location=TGGT1_chrVIII:5107551-5110685(+) | protein_length=208 | sequence_SO=chromosome | SO=protein_coding_gene | is_pseudo=false	0.003	3.92	5	1	1	1	208	24.5	10.73	3.08	1	1.188	1.169	0.919	0.974	0.698	0.554	0.461	0.585	0.554	71.5	85	83.6	65.7	69.6	49.9	39.6	33	41.8	39.6	High	High	High	High	High	High	High	High	High	High	1
-6.23682e+18	FALSE	High	IsMasterProtein	TGGT1_273150-t26_1-p1	transcript=TGGT1_273150-t26_1 | gene=TGGT1_273150 | organism=Toxoplasma_gondii_GT1 | gene_product=RING-type domain-containing protein [Source:UniProtKB/TrEMBL;Acc:S7V3C5] | transcript_product=zinc finger, C3HC4 type (RING finger) domain-containing protein | location=TGGT1_chrVIII:3626780-3629450(-) | protein_length=779 | sequence_SO=chromosome | SO=protein_coding_gene | is_pseudo=false	0	10.779	6	3	3	3	779	81.5	5.97	10.4	3	1.181	1.263	0.828	0.813	0.76	0.522	0.389	0.437	0.402	71.5	84.5	90.3	59.2	58.2	54.4	37.4	27.8	31.3	28.8	High	High	High	High	High	High	High	High	High	High	1
-7.64538e+18	FALSE	High	IsMasterProtein	TGGT1_203860-t26_1-p1	transcript=TGGT1_203860-t26_1 | gene=TGGT1_203860 | organism=Toxoplasma_gondii_GT1 | gene_product=hypothetical protein | transcript_product=hypothetical protein | location=TGGT1_chrVIIa:2078127-2080127(-) | protein_length=495 | sequence_SO=chromosome | SO=protein_coding_gene | is_pseudo=false	0	12.349	7	2	3	2	495	51.3	6.89	10.25	2	1.25	1.491	1.155	1.131	1.152	0.887	0.848	0.847	0.941	71.8	89.7	107	82.9	81.2	82.7	63.6	60.9	60.8	67.5	High	High	High	High	High	High	High	High	High	High	1
-9.14925e+18	FALSE	High	IsMasterProtein	TGGT1_310100-t26_1-p1	transcript=TGGT1_310100-t26_1 | gene=TGGT1_310100 | organism=Toxoplasma_gondii_GT1 | gene_product=GPI mannosyltransferase 1 [Source:UniProtKB/TrEMBL;Acc:S7W191] | transcript_product=mannosyltransferase (pig-m) protein | location=TGGT1_chrXI:1015727-1021407(+) | protein_length=576 | sequence_SO=chromosome | SO=protein_coding_gene | is_pseudo=false	0	7.579	5	2	2	2	576	63.2	9.6	5.99	2	1.357	1.427	0.889	0.945	0.908	0.712	0.619	0.666	0.463	72	97.7	102.8	64.1	68.1	65.4	51.3	44.6	47.9	33.3	High	High	High	High	High	High	High	High	High	High	1
-9.16965e+18	FALSE	Medium	IsMasterProtein	TGGT1_288840-t26_1-p1	transcript=TGGT1_288840-t26_1 | gene=TGGT1_288840 | organism=Toxoplasma_gondii_GT1 | gene_product=hypothetical protein | transcript_product=hypothetical protein | location=TGGT1_chrIX:2574137-2576083(+) | protein_length=648 | sequence_SO=chromosome | SO=protein_coding_gene | is_pseudo=false	0.046	1.336	2	1	1	1	648	70.8	9.13	1.89	1	1.481	1.619	1.212	1.048	0.956	0.622	0.453	0.59	0.639	72.2	107	116.9	87.5	75.7	69	44.9	32.8	42.6	46.2	High	High	High	High	High	High	High	High	High	High	1
9.16783e+18	FALSE	High	IsMasterProtein	TGGT1_264950-t26_1-p1	transcript=TGGT1_264950-t26_1 | gene=TGGT1_264950 | organism=Toxoplasma_gondii_GT1 | gene_product=C-CAP/cofactor C-like domain-containing protein [Source:UniProtKB/TrEMBL;Acc:S7UGQ8] | transcript_product=hypothetical protein | location=TGGT1_chrIX:1709593-1713667(+) | protein_length=345 | sequence_SO=chromosome | SO=protein_coding_gene | is_pseudo=false	0.001	5.716	6	2	6	2	345	38.1	5.44	11.64	2	1.107	1.194	0.941	0.865	0.552	0.454	0.439	0.388	0.314	72.9	80.8	87.1	68.6	63.1	40.3	33.1	32	28.3	22.9	High	High	High	High	High	High	High	High	High	High	1
6.79207e+18	FALSE	High	IsMasterProtein	TGGT1_281380-t26_1-p1	transcript=TGGT1_281380-t26_1 | gene=TGGT1_281380 | organism=Toxoplasma_gondii_GT1 | gene_product=hypothetical protein | transcript_product=hypothetical protein | location=TGGT1_chrVIIa:3954053-3958576(+) | protein_length=1204 | sequence_SO=chromosome | SO=protein_coding_gene | is_pseudo=false	0	14.851	3	2	4	2	1204	130.1	5.86	18.39	2	1.126	1.351	0.954	1.153	0.894	0.495	0.458	0.473	0.538	73.4	82.6	99.1	70	84.6	65.6	36.3	33.6	34.7	39.5	High	High	High	High	High	High	High	High	High	High	1
-8.80938e+18	FALSE	High	IsMasterProtein	TGGT1_294340-t26_1-p1	transcript=TGGT1_294340-t26_1 | gene=TGGT1_294340 | organism=Toxoplasma_gondii_GT1 | gene_product=hypothetical protein | transcript_product=hypothetical protein | location=TGGT1_chrIa:797278-800698(+) | protein_length=345 | sequence_SO=chromosome | SO=protein_coding_gene | is_pseudo=false	0.001	4.701	5	2	2	2	345	37.7	4.94	4.4	2	1.35	1.518	1.032	1.037	0.857	0.707	0.696	0.657	0.635	73.4	99.1	111.4	75.7	76.1	62.9	51.9	51.1	48.2	46.6	High	High	High	High	High	High	High	High	High	High	1
7.76804e+18	FALSE	Medium	IsMasterProtein	TGGT1_224630-t26_1-p1	transcript=TGGT1_224630-t26_1 | gene=TGGT1_224630 | organism=Toxoplasma_gondii_GT1 | gene_product=Zinc finger (CCCH type) motif-containing protein [Source:UniProtKB/TrEMBL;Acc:S7UWA4] | transcript_product=zinc finger (CCCH type) motif-containing protein | location=TGGT1_chrX:2823288-2829559(-) | protein_length=1934 | sequence_SO=chromosome | SO=protein_coding_gene | is_pseudo=false	0.011	2.345	0	1	1	1	1934	209.1	6.49	2.17	1	1.207	1.463	1.156	1.071	0.931	0.619	0.524	0.481	0.437	73.5	88.7	107.5	84.9	78.7	68.4	45.5	38.5	35.3	32.1	High	High	High	High	High	High	High	High	High	High	1
-1.10216e+18	FALSE	High	IsMasterProtein	TGGT1_236160-t26_1-p1	transcript=TGGT1_236160-t26_1 | gene=TGGT1_236160 | organism=Toxoplasma_gondii_GT1 | gene_product=hypothetical protein | transcript_product=hypothetical protein | location=TGGT1_chrX:5191974-5200637(-) | protein_length=768 | sequence_SO=chromosome | SO=protein_coding_gene | is_pseudo=false	0	9.439	3	1	1	1	768	83.5	9.96	5.89	1	1.238	1.469	1.051	0.854	0.791	0.356	0.294	0.349	0.349	73.6	91.1	108.1	77.4	62.8	58.2	26.2	21.6	25.7	25.7	High	High	High	High	High	High	High	High	High	High	1
-6.9549e+18	FALSE	High	IsMasterProtein	TGGT1_316750-t26_1-p1	transcript=TGGT1_316750-t26_1 | gene=TGGT1_316750 | organism=Toxoplasma_gondii_GT1 | gene_product=Helicase ATP-binding domain-containing protein [Source:UniProtKB/TrEMBL;Acc:S7W105] | transcript_product=DEAD/DEAH box helicase domain-containing protein | location=TGGT1_chrXI:5500551-5515725(-) | protein_length=1984 | sequence_SO=chromosome | SO=protein_coding_gene | is_pseudo=false	0	7.462	1	1	2	1	1984	218.6	8.37	7.14	1	1.26	1.436	1.031	0.995	0.79	0.511	0.382	0.38	0.279	73.7	92.9	105.8	76	73.3	58.2	37.7	28.2	28	20.6	High	High	High	High	High	High	High	High	High	High	1
7.83785e+18	FALSE	Medium	IsMasterProtein	TGGT1_211300-t26_1-p1	transcript=TGGT1_211300-t26_1 | gene=TGGT1_211300 | organism=Toxoplasma_gondii_GT1 | gene_product=Putative DUF74 family protein [Source:UniProtKB/TrEMBL;Acc:S7UJQ2] | transcript_product=putative DUF74 family protein | location=TGGT1_chrIV:1777178-1778772(+) | protein_length=373 | sequence_SO=chromosome | SO=protein_coding_gene | is_pseudo=false	0.028	1.665	2	1	1	1	373	39.7	9.58	1.61	1	1.283	1.488	1.038	1.177	0.898	0.693	0.645	0.688	0.747	73.9	94.9	110	76.7	87	66.4	51.2	47.7	50.9	55.2	High	High	High	High	High	High	High	High	High	High	1
-2.17008e+17	FALSE	Medium	IsMasterProtein	TGGT1_218790-t26_1-p1	transcript=TGGT1_218790-t26_1 | gene=TGGT1_218790 | organism=Toxoplasma_gondii_GT1 | gene_product=EFG_C domain-containing protein [Source:UniProtKB/TrEMBL;Acc:S7WA42] | transcript_product=elongation factor G C-terminus domain-containing protein | location=TGGT1_chrXII:1240487-1247496(+) | protein_length=867 | sequence_SO=chromosome | SO=protein_coding_gene | is_pseudo=false	0.022	1.79	1	1	1	1	867	92.7	6.23	0	1	1.238	1.444	1	1.132	0.95	0.908	0.818	0.801	0.844	74.2	91.9	107.2	74.2	84	70.5	67.4	60.7	59.5	62.7	High	High	High	High	High	High	High	High	High	High	1
-4.48831e+18	FALSE	Medium	IsMasterProtein	TGGT1_241830-t26_1-p1	transcript=TGGT1_241830-t26_1 | gene=TGGT1_241830 | organism=Toxoplasma_gondii_GT1 | gene_product=PPIase cyclophilin-type domain-containing protein [Source:UniProtKB/TrEMBL;Acc:S7USB7] | transcript_product=peptidyl-prolyl cis-trans isomerase | location=TGGT1_chrVI:1669051-1671527(-) | protein_length=575 | sequence_SO=chromosome | SO=protein_coding_gene | is_pseudo=false	0.012	2.186	1	1	3	1	575	64.4	7.55	6.74	1	1.166	1.178	0.833	0.842	0.602	0.581	0.535	0.43	0.554	74.3	86.6	87.5	61.9	62.6	44.7	43.1	39.7	31.9	41.2	High	High	High	High	High	High	High	High	High	High	1
-2.09139e+18	FALSE	High	IsMasterProtein	TGGT1_295630-t26_1-p1	transcript=TGGT1_295630-t26_1 | gene=TGGT1_295630 | organism=Toxoplasma_gondii_GT1 | gene_product=hypothetical protein | transcript_product=hypothetical protein | location=TGGT1_chrIa:1649908-1651185(-) | protein_length=155 | sequence_SO=chromosome | SO=protein_coding_gene | is_pseudo=false	0	23.095	45	3	6	3	155	16.5	9.54	29.38	3	1.117	1.425	1.116	1.489	1.231	1.253	1.171	1.243	1.242	74.7	83.4	106.4	83.4	111.2	91.9	93.6	87.5	92.8	92.8	High	High	High	High	High	High	High	High	High	High	1
4.99814e+18	FALSE	High	IsMasterProtein	TGGT1_290650-t26_1-p1	transcript=TGGT1_290650-t26_1 | gene=TGGT1_290650 | organism=Toxoplasma_gondii_GT1 | gene_product=hypothetical protein | transcript_product=hypothetical protein | location=TGGT1_chrIX:3620947-3627285(+) | protein_length=686 | sequence_SO=chromosome | SO=protein_coding_gene | is_pseudo=false	0.003	3.378	4	2	3	2	686	74.7	9.47	4.98	2	1.338	1.898	1.098	1.524	1.003	1.306	1.247	1.037	1.245	74.8	100	141.9	82.1	113.9	75	97.7	93.3	77.5	93.1	High	High	High	High	High	High	High	High	High	High	1
-3.60988e+18	FALSE	High	IsMasterProtein	TGGT1_263820-t26_1-p1	transcript=TGGT1_263820-t26_1 | gene=TGGT1_263820 | organism=Toxoplasma_gondii_GT1 | gene_product=DEAD/DEAH box helicase domain-containing protein [Source:UniProtKB/TrEMBL;Acc:S7W6E5] | transcript_product=DEAD/DEAH box helicase domain-containing protein | location=TGGT1_chrVIIb:278943-285443(+) | protein_length=1053 | sequence_SO=chromosome | SO=protein_coding_gene | is_pseudo=false	0.003	3.694	1	1	1	1	1053	116	9.89	2.59	1	1.162	1.631	0.87	0.958	0.948	0.75	0.513	0.584	0.907	75	87.1	122.3	65.2	71.9	71.1	56.2	38.4	43.8	68	High	High	High	High	High	High	High	High	High	High	1
-6.48588e+18	FALSE	Medium	IsMasterProtein	TGGT1_236860-t26_1-p1	transcript=TGGT1_236860-t26_1 | gene=TGGT1_236860 | organism=Toxoplasma_gondii_GT1 | gene_product=Haloacid dehalogenase family hydrolase domain-containing protein [Source:UniProtKB/TrEMBL;Acc:S7W5V6] | transcript_product=haloacid dehalogenase family hydrolase domain-containing protein | location=TGGT1_chrX:5441967-5450118(+) | protein_length=2473 | sequence_SO=chromosome | SO=protein_coding_gene …	0.028	1.669	0	1	1	1	2473	270.5	8.47	0	1	1.238	1.363	1.083	1.074	0.927	0.84	0.824	0.613	0.577	75.1	92.9	102.3	81.3	80.6	69.6	63	61.9	46	43.3	High	High	High	High	High	High	High	High	High	High	1
-1.57037e+17	FALSE	High	IsMasterProtein	TGGT1_318370-t26_1-p1	transcript=TGGT1_318370-t26_1 | gene=TGGT1_318370 | organism=Toxoplasma_gondii_GT1 | gene_product=hypothetical protein | transcript_product=hypothetical protein | location=TGGT1_chrIV:1326607-1328217(-) | protein_length=536 | sequence_SO=chromosome | SO=protein_coding_gene | is_pseudo=false	0	10.603	5	2	3	2	536	58.3	5.88	11.2	2	1.006	1.185	0.954	1.039	0.852	0.784	0.642	0.602	0.652	75.4	75.8	89.4	71.9	78.3	64.2	59.1	48.4	45.4	49.2	High	High	High	High	High	High	High	High	High	High	1
4.39319e+18	FALSE	Medium	IsMasterProtein	TGGT1_314430-t26_1-p1	transcript=TGGT1_314430-t26_1 | gene=TGGT1_314430 | organism=Toxoplasma_gondii_GT1 | gene_product=TYR_PHOSPHATASE_2 domain-containing protein [Source:UniProtKB/TrEMBL;Acc:S7W2B2] | transcript_product=serine/threonine specific protein phosphatase | location=TGGT1_chrXI:4063083-4067125(+) | protein_length=479 | sequence_SO=chromosome | SO=protein_coding_gene | is_pseudo=false	0.018	1.932	2	1	1	1	479	53.7	8.51	2.12	1	1.103	1.012	0.811	0.682	0.451	0.409	0.287	0.305	0.327	75.4	83.2	76.3	61.2	51.4	34	30.9	21.7	23	24.6	High	High	High	High	High	High	High	High	High	High	1
-7.29773e+18	FALSE	High	IsMasterProtein	TGGT1_254610-t26_1-p1	transcript=TGGT1_254610-t26_1 | gene=TGGT1_254610 | organism=Toxoplasma_gondii_GT1 | gene_product=Mitochondrial import inner membrane translocase subunit [Source:UniProtKB/TrEMBL;Acc:S7UMY1] | transcript_product=Tim10/DDP family zinc finger superfamily protein | location=TGGT1_chrIII:1837560-1838967(-) | protein_length=91 | sequence_SO=chromosome | SO=protein_coding_gene | is_pseudo=false	0	15.934	24	1	3	1	91	10.2	5.4	15.37	1	1.296	1.629	1.288	1.366	1.239	1.286	1.116	1.219	1.306	75.8	98.2	123.5	97.6	103.6	93.9	97.5	84.6	92.4	99	High	High	High	High	High	High	High	High	High	High	1
-6.00684e+18	FALSE	High	IsMasterProtein	TGGT1_316200-t26_1-p1	transcript=TGGT1_316200-t26_1 | gene=TGGT1_316200 | organism=Toxoplasma_gondii_GT1 | gene_product=Phosphoglycerate mutase family protein [Source:UniProtKB/TrEMBL;Acc:S7UM57] | transcript_product=phosphoglycerate mutase family protein | location=TGGT1_chrXI:5126229-5130526(-) | protein_length=555 | sequence_SO=chromosome | SO=protein_coding_gene | is_pseudo=false	0.001	6.24	2	1	3	1	555	60.8	8.79	9.54	1	1.157	1.025	0.876	0.842	0.633	0.445	0.351	0.415	0.227	76	87.9	77.9	66.5	64	48.1	33.8	26.7	31.5	17.3	High	High	High	High	High	High	High	High	High	High	1
-5.99734e+18	FALSE	Medium	IsMasterProtein	TGGT1_233200-t26_1-p1	transcript=TGGT1_233200-t26_1 | gene=TGGT1_233200 | organism=Toxoplasma_gondii_GT1 | gene_product=Ubiquitin-related modifier 1 [Source:UniProtKB/TrEMBL;Acc:S7V323] | transcript_product=ubiquitin related modifier protein | location=TGGT1_chrVIII:2490651-2491175(-) | protein_length=174 | sequence_SO=chromosome | SO=protein_coding_gene | is_pseudo=false	0.019	1.847	4	1	1	1	174	18.6	4.68	2.39	1	0.989	1.182	0.889	0.923	0.889	0.553	0.535	0.603	0.542	76.1	75.3	90	67.7	70.3	67.7	42.1	40.7	45.9	41.2	High	High	High	High	High	High	High	High	High	High	1
6.82016e+17	FALSE	High	IsMasterProtein	TGGT1_253070-t26_1-p1	transcript=TGGT1_253070-t26_1 | gene=TGGT1_253070 | organism=Toxoplasma_gondii_GT1 | gene_product=Hydrolase, TatD family protein [Source:UniProtKB/TrEMBL;Acc:S7VVW3] | transcript_product=hydrolase, TatD family protein | location=TGGT1_chrIII:697423-702989(+) | protein_length=708 | sequence_SO=chromosome | SO=protein_coding_gene | is_pseudo=false	0	10.72	5	3	3	3	708	78.3	9.69	9.97	3	1.185	1.484	1.13	1.003	1.056	0.748	0.573	0.569	0.348	76.1	90.2	113	86	76.4	80.4	57	43.6	43.3	26.5	High	High	High	High	High	High	High	High	High	High	1
-7.80528e+18	FALSE	High	IsMasterProtein	TGGT1_285240-t26_1-p1	transcript=TGGT1_285240-t26_1 | gene=TGGT1_285240 | organism=Toxoplasma_gondii_GT1 | gene_product=S5A_REDUCTASE domain-containing protein [Source:UniProtKB/TrEMBL;Acc:A0A125YK59] | transcript_product=3-oxo-5-alpha-steroid 4-dehydrogenase | location=TGGT1_chrV:2347912-2353553(-) | protein_length=347 | sequence_SO=chromosome | SO=protein_coding_gene | is_pseudo=false	0.001	5.38	3	2	4	2	347	40.1	10.87	11.79	2	1.469	1.359	0.822	0.915	0.441	0.434	0.372	0.351	0.258	76.2	111.9	103.5	62.6	69.7	33.6	33.1	28.3	26.8	19.6	High	High	High	High	High	High	High	High	High	High	1
-4.70238e+18	FALSE	High	IsMasterProtein	TGGT1_205600-t26_1-p1	transcript=TGGT1_205600-t26_1 | gene=TGGT1_205600 | organism=Toxoplasma_gondii_GT1 | gene_product=RING-type domain-containing protein [Source:UniProtKB/TrEMBL;Acc:S7W335] | transcript_product=zinc finger, C3HC4 type (RING finger) domain-containing protein | location=TGGT1_chrVIIa:1192389-1196405(+) | protein_length=533 | sequence_SO=chromosome | SO=protein_coding_gene | is_pseudo=false	0.001	6.032	6	2	2	2	533	58	5.12	4.59	2	1.162	1.12	1.022	0.925	0.969	0.593	0.61	0.662	0.55	76.5	88.8	85.7	78.2	70.8	74.1	45.3	46.7	50.6	42.1	High	High	High	High	High	High	High	High	High	High	1
-3.27418e+18	FALSE	High	IsMasterProtein	TGGT1_200240-t26_1-p1	transcript=TGGT1_200240-t26_1 | gene=TGGT1_200240 | organism=Toxoplasma_gondii_GT1 | gene_product=Microneme protein MIC17B [Source:UniProtKB/TrEMBL;Acc:S7UFC4] | transcript_product=microneme protein MIC17B | location=AAQM03000392:4651-5706(+) | protein_length=351 | sequence_SO=contig | SO=protein_coding_gene | is_pseudo=false	0	97.068	31	10	56	1	351	38.8	7.78	180.79	10	1.18	1.461	0.975	1.138	1.206	1.069	0.856	0.976	0.956	76.9	90.7	112.3	75	87.5	92.7	82.2	65.8	75	73.5	High	High	High	High	High	High	High	High	High	High	1
-8.5384e+18	FALSE	High	IsMasterProtein	TGGT1_242700-t26_1-p1	transcript=TGGT1_242700-t26_1 | gene=TGGT1_242700 | organism=Toxoplasma_gondii_GT1 | gene_product=hypothetical protein | transcript_product=hypothetical protein | location=TGGT1_chrVI:2097764-2109765(-) | protein_length=2288 | sequence_SO=chromosome | SO=protein_coding_gene | is_pseudo=false	0	7.674	1	2	2	2	2288	246.2	7.43	5.37	2	1.396	1.679	0.831	0.996	0.912	0.681	0.72	0.618	0.79	76.9	107.3	129.1	63.9	76.6	70.1	52.4	55.3	47.5	60.8	High	High	High	High	High	High	High	High	High	High	1
7.89229e+18	FALSE	High	IsMasterProtein	TGGT1_222270-t26_1-p1	transcript=TGGT1_222270-t26_1 | gene=TGGT1_222270 | organism=Toxoplasma_gondii_GT1 | gene_product=hypothetical protein | transcript_product=hypothetical protein | location=TGGT1_chrII:987896-990436(+) | protein_length=387 | sequence_SO=chromosome | SO=protein_coding_gene | is_pseudo=false	0	13.585	16	3	4	3	387	41.6	6.79	14.05	3	1.213	1.356	1.061	1.066	0.861	0.68	0.46	0.49	0.472	77.3	93.7	104.8	82	82.4	66.5	52.6	35.5	37.9	36.5	High	High	High	High	High	High	High	High	High	High	1
2.88481e+18	FALSE	Low	IsMasterProtein	TGGT1_206310-t26_1-p1	transcript=TGGT1_206310-t26_1 | gene=TGGT1_206310 | organism=Toxoplasma_gondii_GT1 | gene_product=Prenyltransferase, UbiA family protein [Source:UniProtKB/TrEMBL;Acc:S7W9J3] | transcript_product=prenyltransferase, UbiA family protein | location=TGGT1_chrVIIa:1045454-1049984(+) | protein_length=929 | sequence_SO=chromosome | SO=protein_coding_gene | is_pseudo=false	0.066	1.147	1	1	1	1	929	100.3	8.91	1.68	1	0.904	1.225	1.278	0.699	0.97	0.432	0.287	0.334	0.247	77.4	69.9	94.8	98.8	54	75	33.4	22.2	25.8	19.1	High	High	High	High	High	High	High	High	High	High	1
-6.73683e+18	FALSE	High	IsMasterProtein	TGGT1_248480-t26_1-p1	transcript=TGGT1_248480-t26_1 | gene=TGGT1_248480 | organism=Toxoplasma_gondii_GT1 | gene_product=S4 RNA-binding domain-containing protein [Source:UniProtKB/TrEMBL;Acc:A0A125YWF5] | transcript_product=ribosomal protein RPS9 | location=TGGT1_chrXII:3816916-3818776(+) | protein_length=188 | sequence_SO=chromosome | SO=protein_coding_gene | is_pseudo=false	0	9.824	18	3	5	3	188	21.7	10.51	8.17	3	1.947	1.689	0.723	1.214	0.507	0.703	0.549	0.577	0.652	77.8	151.6	131.4	56.3	94.4	39.5	54.7	42.7	44.9	50.7	High	High	High	High	High	High	High	High	High	High	1
-2.9704e+18	FALSE	High	IsMasterProtein	TGGT1_301130-t26_1-p1	transcript=TGGT1_301130-t26_1 | gene=TGGT1_301130 | organism=Toxoplasma_gondii_GT1 | gene_product=hypothetical protein | transcript_product=hypothetical protein | location=TGGT1_chrIV:2168473-2169812(+) | protein_length=127 | sequence_SO=chromosome | SO=protein_coding_gene | is_pseudo=false	0.001	5.671	13	1	2	1	127	13.5	5.85	6.9	1	1.352	1.294	0.928	1.291	0.941	1.172	0.961	0.965	1.163	78.1	105.7	101.1	72.5	100.9	73.6	91.6	75.1	75.4	90.8	High	High	High	High	High	High	High	High	High	High	1	Phospho [S111]
-3570170721728500	FALSE	High	IsMasterProtein	TGGT1_245580-t26_1-p1	transcript=TGGT1_245580-t26_1 | gene=TGGT1_245580 | organism=Toxoplasma_gondii_GT1 | gene_product=Protein kinase domain-containing protein [Source:UniProtKB/TrEMBL;Acc:S7V1A4] | transcript_product=hypothetical protein | location=TGGT1_chrXII:2332712-2345516(+) | protein_length=2313 | sequence_SO=chromosome | SO=protein_coding_gene | is_pseudo=false	0.002	4.014	1	2	3	2	2313	246.4	8.6	4.79	2	1.229	1.429	0.947	0.928	0.834	0.639	0.535	0.58	0.601	78.5	96.4	112.1	74.3	72.8	65.5	50.2	42	45.5	47.2	High	High	High	High	High	High	High	High	High	High	1
-5.91273e+18	FALSE	Medium	IsMasterProtein	TGGT1_225720-t26_1-p1	transcript=TGGT1_225720-t26_1 | gene=TGGT1_225720 | organism=Toxoplasma_gondii_GT1 | gene_product=hypothetical protein | transcript_product=hypothetical protein | location=TGGT1_chrX:2017151-2019676(+) | protein_length=300 | sequence_SO=chromosome | SO=protein_coding_gene | is_pseudo=false	0.012	2.283	3	1	1	1	300	31.7	10.33	1.92	1	1.269	1.286	0.917	0.999	0.807	0.601	0.596	0.613	0.611	78.7	99.8	101.2	72.1	78.6	63.5	47.3	46.9	48.3	48.1	High	High	High	High	High	High	High	High	High	High	1
7.02292e+18	FALSE	High	IsMasterProtein	TGGT1_226270-t26_1-p1	transcript=TGGT1_226270-t26_1 | gene=TGGT1_226270 | organism=Toxoplasma_gondii_GT1 | gene_product=hypothetical protein | transcript_product=hypothetical protein | location=TGGT1_chrX:1657298-1661542(+) | protein_length=258 | sequence_SO=chromosome | SO=protein_coding_gene | is_pseudo=false	0.003	3.542	4	1	1	1	258	27.7	9.39	2.44	1	1.181	1.387	0.961	1.003	0.804	0.662	0.504	0.54	0.514	78.9	93.2	109.4	75.8	79.1	63.4	52.2	39.7	42.6	40.5	High	High	High	High	High	High	High	High	High	High	1
-8.60754e+18	FALSE	Medium	IsMasterProtein	TGGT1_232475-t26_1-p1	transcript=TGGT1_232475-t26_1 | gene=TGGT1_232475 | organism=Toxoplasma_gondii_GT1 | gene_product=hypothetical protein | transcript_product=hypothetical protein | location=TGGT1_chrVIII:2110037-2113638(+) | protein_length=808 | sequence_SO=chromosome | SO=protein_coding_gene | is_pseudo=false	0.014	2.046	1	1	1	1	808	90.2	6.29	2.48	1	1.175	1.638	1.055	1.06	1.178	0.81	0.722	0.72	0.751	79.2	93.1	129.7	83.5	84	93.3	64.2	57.2	57	59.5	High	High	High	High	High	High	High	High	High	High	1
2.06423e+18	FALSE	High	IsMasterProtein	TGGT1_236550-t26_1-p1	transcript=TGGT1_236550-t26_1 | gene=TGGT1_236550 | organism=Toxoplasma_gondii_GT1 | gene_product=hypothetical protein | transcript_product=hypothetical protein | location=TGGT1_chrX:5308357-5309874(-) | protein_length=165 | sequence_SO=chromosome | SO=protein_coding_gene | is_pseudo=false	0.003	3.937	7	1	3	1	165	18.2	9.67	8.16	1	1.098	1.357	1.036	1.036	0.875	0.697	0.623	0.598	0.455	79.4	87.1	107.7	82.3	82.2	69.5	55.3	49.4	47.5	36.1	High	High	High	High	High	High	High	High	High	High	1
-4.8076e+18	FALSE	High	IsMasterProtein	TGGT1_241000-t26_1-p1	transcript=TGGT1_241000-t26_1 | gene=TGGT1_241000 | organism=Toxoplasma_gondii_GT1 | gene_product=hypothetical protein | transcript_product=hypothetical protein | location=TGGT1_chrVI:1589096-1589797(-) | protein_length=233 | sequence_SO=chromosome | SO=protein_coding_gene | is_pseudo=false	0	29.294	10	1	5	1	233	25.4	4.88	28.34	1	1.15	1.467	1.059	1.277	0.988	0.707	0.788	0.747	0.621	79.6	91.6	116.8	84.3	101.6	78.7	56.3	62.7	59.5	49.5	High	High	High	High	High	High	High	High	High	High	1	Phospho [S226]
1.79954e+18	FALSE	High	IsMasterProtein	TGGT1_227150-t26_1-p1	transcript=TGGT1_227150-t26_1 | gene=TGGT1_227150 | organism=Toxoplasma_gondii_GT1 | gene_product=Glutaredoxin domain-containing protein [Source:UniProtKB/TrEMBL;Acc:A0A125YTU0] | transcript_product=putative glutaredoxin | location=TGGT1_chrX:973361-975393(+) | protein_length=332 | sequence_SO=chromosome | SO=protein_coding_gene | is_pseudo=false	0.008	2.584	3	1	1	1	332	36.1	9.04	3.68	1	1.225	1.825	1.267	0.947	0.928	0.649	0.52	0.608	0.681	79.6	97.5	145.3	100.9	75.4	73.9	51.6	41.4	48.4	54.3	High	High	High	High	High	High	High	High	High	High	1
-9.61923e+17	FALSE	High	IsMasterProtein	TGGT1_214600-t26_1-p1	transcript=TGGT1_214600-t26_1 | gene=TGGT1_214600 | organism=Toxoplasma_gondii_GT1 | gene_product=hypothetical protein | transcript_product=hypothetical protein | location=TGGT1_chrX:6286080-6303782(-) | protein_length=4050 | sequence_SO=chromosome | SO=protein_coding_gene | is_pseudo=false	0.004	3.318	1	2	3	2	4050	432.8	7.17	4.38	2	1.205	1.341	0.967	1.071	0.673	0.482	0.405	0.419	0.413	79.7	96.1	106.9	77.1	85.4	53.6	38.4	32.3	33.4	32.9	High	High	High	High	High	High	High	High	High	High	1
-5.71076e+18	FALSE	High	IsMasterProtein	TGGT1_264890-t26_1-p1	transcript=TGGT1_264890-t26_1 | gene=TGGT1_264890 | organism=Toxoplasma_gondii_GT1 | gene_product=hypothetical protein | transcript_product=hypothetical protein | location=TGGT1_chrIX:1738833-1746400(-) | protein_length=1944 | sequence_SO=chromosome | SO=protein_coding_gene | is_pseudo=false	0.001	6.69	1	2	2	2	1944	200.4	7.46	5.2	2	1.179	1.291	0.99	0.88	0.981	0.767	0.786	0.705	0.738	80	94.4	103.4	79.2	70.4	78.5	61.4	62.9	56.4	59.1	High	High	High	High	High	High	High	High	High	High	1
9.15865e+17	FALSE	High	IsMasterProtein	TGGT1_289780-t26_1-p1	transcript=TGGT1_289780-t26_1 | gene=TGGT1_289780 | organism=Toxoplasma_gondii_GT1 | gene_product=Putative ATP-dependent hsl protease ATP-binding subunit hslU [Source:UniProtKB/TrEMBL;Acc:S7UQ62] | transcript_product=putative ATP-dependent hsl protease ATP-binding subunit hslU | location=TGGT1_chrIX:3249835-3260280(-) | protein_length=938 | sequence_SO=chromosome | SO=protein_coding_gene | is_pse…	0	8.752	3	3	4	2	938	101.7	9.01	10.53	3	1.897	1.931	0.826	1.406	0.532	0.465	0.504	0.422	0.33	80	151.8	154.6	66.1	112.6	42.5	37.2	40.3	33.8	26.4	High	High	High	High	High	High	High	High	High	High	1
7.17544e+18	FALSE	High	IsMasterProtein	TGGT1_268260-t26_1-p1	transcript=TGGT1_268260-t26_1 | gene=TGGT1_268260 | organism=Toxoplasma_gondii_GT1 | gene_product=hypothetical protein | transcript_product=hypothetical protein | location=TGGT1_chrVIII:6589613-6599284(-) | protein_length=801 | sequence_SO=chromosome | SO=protein_coding_gene | is_pseudo=false	0.002	4.226	1	1	1	1	801	86.7	9.29	3.12	1	1.174	1.128	0.898	0.867	0.617	0.497	0.421	0.316	0.328	80.1	94.1	90.4	71.9	69.5	49.4	39.8	33.8	25.3	26.3	High	High	High	High	High	High	High	High	High	High	1
3.25535e+18	FALSE	High	IsMasterProtein	TGGT1_246030-t26_1-p1	transcript=TGGT1_246030-t26_1 | gene=TGGT1_246030 | organism=Toxoplasma_gondii_GT1 | gene_product=Mediator complex subunit MED17 [Source:UniProtKB/TrEMBL;Acc:S7V142] | transcript_product=mediator complex subunit MED17 | location=TGGT1_chrXII:2536393-2539086(+) | protein_length=897 | sequence_SO=chromosome | SO=protein_coding_gene | is_pseudo=false	0	13.474	5	3	3	3	897	96.5	6.19	9.95	3	1.124	1.199	0.992	0.967	0.827	0.637	0.564	0.524	0.574	80.2	90.1	96.1	79.6	77.6	66.3	51	45.3	42	46	High	High	High	High	High	High	High	High	High	High	1
-3.42332e+18	FALSE	High	IsMasterProtein	TGGT1_321540-t26_1-p1	transcript=TGGT1_321540-t26_1 | gene=TGGT1_321540 | organism=Toxoplasma_gondii_GT1 | gene_product=hypothetical protein | transcript_product=hypothetical protein | location=TGGT1_chrIb:1748937-1758091(+) | protein_length=1072 | sequence_SO=chromosome | SO=protein_coding_gene | is_pseudo=false	0	11.682	4	3	3	3	1072	116.6	5.91	8.69	3	1.126	1.341	0.92	0.716	0.706	0.576	0.549	0.549	0.445	80.3	90.4	107.7	73.9	57.4	56.7	46.2	44.1	44.1	35.7	High	High	High	High	High	High	High	High	High	High	1
6.5482e+18	FALSE	High	IsMasterProtein	TGGT1_275330-t26_1-p1	transcript=TGGT1_275330-t26_1 | gene=TGGT1_275330 | organism=Toxoplasma_gondii_GT1 | gene_product=Ribosomal protein RPL29 [Source:UniProtKB/TrEMBL;Acc:S7UPT4] | transcript_product=ribosomal protein RPL29 | location=TGGT1_chrX:7071284-7074489(-) | protein_length=877 | sequence_SO=chromosome | SO=protein_coding_gene | is_pseudo=false	0.002	4.075	1	1	2	1	877	95.5	10.08	7.21	1	1.257	1.501	1.144	1.231	0.971	0.531	0.443	0.494	0.469	80.8	101.6	121.3	92.4	99.4	78.4	42.9	35.8	39.9	37.9	High	High	High	High	High	High	High	High	High	High	1
-3.85357e+17	FALSE	High	IsMasterProtein	TGGT1_232680-t26_1-p1	transcript=TGGT1_232680-t26_1 | gene=TGGT1_232680 | organism=Toxoplasma_gondii_GT1 | gene_product=hypothetical protein | transcript_product=hypothetical protein | location=TGGT1_chrVIII:2216288-2225214(-) | protein_length=1738 | sequence_SO=chromosome | SO=protein_coding_gene | is_pseudo=false	0	7.762	1	2	2	2	1738	180.3	9.07	4.54	2	1.125	1.415	1.036	0.978	1.049	0.847	0.71	0.857	0.845	80.8	90.9	114.3	83.7	79	84.7	68.4	57.3	69.2	68.2	High	High	High	High	High	High	High	High	High	High	1
-1.46643e+18	FALSE	Medium	IsMasterProtein	TGGT1_297647-t26_1-p1	transcript=TGGT1_297647-t26_1 | gene=TGGT1_297647 | organism=Toxoplasma_gondii_GT1 | gene_product=hypothetical protein | transcript_product=hypothetical protein | location=TGGT1_chrII:1863823-1864841(-) | protein_length=172 | sequence_SO=chromosome | SO=protein_coding_gene | is_pseudo=false	0.018	1.944	5	1	2	1	172	19.3	10.49	6.19	1	1.396	1.608	1.044	1.208	0.827	0.553	0.387	0.509	0.538	81.1	113.2	130.4	84.7	98	67	44.9	31.4	41.3	43.7	High	High	High	High	High	High	High	High	High	High	1
-8.18413e+18	FALSE	Medium	IsMasterProtein	TGGT1_320470-t26_1-p1	transcript=TGGT1_320470-t26_1 | gene=TGGT1_320470 | organism=Toxoplasma_gondii_GT1 | gene_product=hypothetical protein | transcript_product=hypothetical protein | location=TGGT1_chrIV:266280-267005(+) | protein_length=241 | sequence_SO=chromosome | SO=protein_coding_gene | is_pseudo=false	0.022	1.785	3	1	1	1	241	27	9.32	1.99	1	1.147	1.137	1.003	0.931	0.778	0.594	0.54	0.565	0.51	82.1	94.1	93.4	82.4	76.4	63.9	48.8	44.3	46.3	41.9	High	High	High	High	High	High	High	High	High	High	1
-2.11094e+18	FALSE	High	IsMasterProtein	TGGT1_223840-t26_1-p1	transcript=TGGT1_223840-t26_1 | gene=TGGT1_223840 | organism=Toxoplasma_gondii_GT1 | gene_product=Putative ATP-citrate lyase [Source:UniProtKB/TrEMBL;Acc:S7UW82] | transcript_product=putative ATP-citrate lyase | location=TGGT1_chrX:3444517-3448806(-) | protein_length=1281 | sequence_SO=chromosome | SO=protein_coding_gene | is_pseudo=false	0.001	6.931	2	2	3	2	1281	139.7	6.57	7.69	2	1.236	1.441	0.888	0.821	0.786	0.552	0.498	0.569	0.504	82.3	101.6	118.5	73.1	67.6	64.7	45.4	41	46.8	41.4	High	High	High	High	High	High	High	High	High	High	1
1.05393e+18	FALSE	High	IsMasterProtein	TGGT1_230950-t26_1-p1	transcript=TGGT1_230950-t26_1 | gene=TGGT1_230950 | organism=Toxoplasma_gondii_GT1 | gene_product=hypothetical protein | transcript_product=hypothetical protein | location=TGGT1_chrVIII:1123267-1131311(+) | protein_length=2239 | sequence_SO=chromosome | SO=protein_coding_gene | is_pseudo=false	0	14.328	2	3	3	3	2239	240.4	7.91	12.05	3	1.302	1.396	1.008	1.078	0.832	0.647	0.555	0.602	0.519	82.6	107.5	115.3	83.2	89	68.7	53.4	45.8	49.7	42.9	High	High	High	High	High	High	High	High	High	High	1
-6.47247e+18	FALSE	High	IsMasterProtein	TGGT1_268182-t26_1-p1	transcript=TGGT1_268182-t26_1 | gene=TGGT1_268182 | organism=Toxoplasma_gondii_GT1 | gene_product=hypothetical protein | transcript_product=hypothetical protein | location=TGGT1_chrVIII:6659816-6662435(+) | protein_length=737 | sequence_SO=chromosome | SO=protein_coding_gene | is_pseudo=false	0	9.462	4	2	6	2	737	79.7	8.06	20.7	2	1.353	1.481	0.979	1.149	0.811	0.663	0.615	0.506	0.466	82.8	112	122.6	81	95.1	67.1	54.9	50.9	41.9	38.6	High	High	High	High	High	High	High	High	High	High	1
3.35986e+18	FALSE	High	IsMasterProtein	TGGT1_291330-t26_1-p1	transcript=TGGT1_291330-t26_1 | gene=TGGT1_291330 | organism=Toxoplasma_gondii_GT1 | gene_product=RRM domain-containing protein [Source:UniProtKB/TrEMBL;Acc:A0A125YM75] | transcript_product=RNA recognition motif-containing protein | location=TGGT1_chrIX:4055101-4057671(+) | protein_length=228 | sequence_SO=chromosome | SO=protein_coding_gene | is_pseudo=false	0.001	5.486	6	1	1	1	228	25.5	10.51	3.56	1	0.956	1.03	0.655	0.603	0.367	0.354	0.384	0.317	0.327	83.4	79.7	85.9	54.6	50.3	30.6	29.6	32	26.4	27.3	High	High	High	High	High	High	High	High	High	High	1
5.13342e+18	FALSE	High	IsMasterProtein	TGGT1_200430-t26_1-p1	transcript=TGGT1_200430-t26_1 | gene=TGGT1_200430 | organism=Toxoplasma_gondii_GT1 | gene_product=CMP/dCMP-type deaminase domain-containing protein [Source:UniProtKB/TrEMBL;Acc:S7V5S2] | transcript_product=cytidine and deoxycytidylate deaminase zinc-binding region domain-containing protein | location=TGGT1_chrVIII:6849719-6856851(-) | protein_length=514 | sequence_SO=chromosome | SO=protein_codin…	0	11.685	7	2	2	2	514	54.9	8.09	8.63	2	1.208	1.468	1.022	1.172	0.913	0.608	0.459	0.43	0.459	83.7	101.1	122.9	85.6	98.2	76.4	50.9	38.4	36	38.4	High	High	High	High	High	High	High	High	High	High	1
1.55449e+18	FALSE	High	IsMasterProtein	TGGT1_269340-t26_1-p1	transcript=TGGT1_269340-t26_1 | gene=TGGT1_269340 | organism=Toxoplasma_gondii_GT1 | gene_product=hypothetical protein | transcript_product=hypothetical protein | location=TGGT1_chrVIII:5882050-5885092(-) | protein_length=577 | sequence_SO=chromosome | SO=protein_coding_gene | is_pseudo=false	0.005	3.114	3	1	1	1	577	64.8	5.81	3.16	1	1.124	1.263	1.077	0.765	0.797	0.457	0.283	0.418	0.449	83.8	94.2	105.9	90.3	64.2	66.9	38.3	23.7	35.1	37.7	High	High	High	High	High	High	High	High	High	High	1
2.84517e+18	FALSE	High	IsMasterProtein	TGGT1_318170-t26_1-p1	transcript=TGGT1_318170-t26_1 | gene=TGGT1_318170 | organism=Toxoplasma_gondii_GT1 | gene_product=hypothetical protein | transcript_product=hypothetical protein | location=TGGT1_chrIV:1455031-1456750(-) | protein_length=411 | sequence_SO=chromosome | SO=protein_coding_gene | is_pseudo=false	0.006	2.814	2	1	2	1	411	43.7	8.31	3.95	1	0.984	1.065	1.222	0.693	1.151	0.543	0.465	0.702	0.467	84.6	83.2	90.1	103.3	58.6	97.3	45.9	39.3	59.4	39.5	High	High	High	High	High	High	High	High	High	High	1
7.37391e+17	FALSE	High	IsMasterProtein	TGGT1_222000-t26_1-p1	transcript=TGGT1_222000-t26_1 | gene=TGGT1_222000 | organism=Toxoplasma_gondii_GT1 | gene_product=Brix domain-containing protein [Source:UniProtKB/TrEMBL;Acc:S7UL49] | transcript_product=brix domain-containing protein | location=TGGT1_chrII:726106-731963(-) | protein_length=508 | sequence_SO=chromosome | SO=protein_coding_gene | is_pseudo=false	0	13.084	6	2	5	2	508	57.4	6.71	23.82	2	1.307	1.582	1.035	1.202	0.868	0.693	0.635	0.523	0.575	84.9	111	134.3	87.9	102.1	73.7	58.8	53.9	44.4	48.8	High	High	High	High	High	High	High	High	High	High	1
8.34812e+18	FALSE	High	IsMasterProtein	TGGT1_220430-t26_1-p1	transcript=TGGT1_220430-t26_1 | gene=TGGT1_220430 | organism=Toxoplasma_gondii_GT1 | gene_product=hypothetical protein | transcript_product=hypothetical protein | location=TGGT1_chrV:271542-276398(-) | protein_length=1618 | sequence_SO=chromosome | SO=protein_coding_gene | is_pseudo=false	0	16.16	2	2	3	2	1618	170.8	6.7	10.3	2	1.107	1.204	0.866	0.739	0.636	0.535	0.47	0.462	0.399	85	94.1	102.4	73.7	62.8	54	45.5	40	39.2	34	High	High	High	High	High	High	High	High	High	High	1
3.93265e+18	FALSE	High	IsMasterProtein	TGGT1_260340-t26_1-p1	transcript=TGGT1_260340-t26_1 | gene=TGGT1_260340 | organism=Toxoplasma_gondii_GT1 | gene_product=DNL-type domain-containing protein [Source:UniProtKB/TrEMBL;Acc:S7UYX5] | transcript_product=DNL zinc finger protein | location=TGGT1_chrVIIb:2318114-2320937(+) | protein_length=261 | sequence_SO=chromosome | SO=protein_coding_gene | is_pseudo=false	0	9.024	8	2	2	2	261	27	8.06	5.49	2	1.1	1.377	1.001	1.061	1.004	0.724	0.654	0.799	0.722	85.4	94	117.7	85.5	90.7	85.8	61.9	55.9	68.2	61.7	High	High	High	High	High	High	High	High	High	High	1
-7.26108e+18	FALSE	High	IsMasterProtein	TGGT1_314000-t26_1-p1	transcript=TGGT1_314000-t26_1 | gene=TGGT1_314000 | organism=Toxoplasma_gondii_GT1 | gene_product=Peptide-methionine (R)-S-oxide reductase [Source:UniProtKB/TrEMBL;Acc:S7UUH0] | transcript_product=putative peptide methionine sulfoxide reductase msrB | location=TGGT1_chrXI:3833817-3837738(-) | protein_length=242 | sequence_SO=chromosome | SO=protein_coding_gene | is_pseudo=false	0	7.884	8	2	2	2	242	26.8	9.57	6.18	2	1.044	1.3	1.005	1.003	0.855	0.763	0.637	0.585	0.552	85.4	89.2	111.1	85.8	85.7	73.1	65.2	54.4	50	47.2	High	High	High	High	High	High	High	High	High	High	1
1.76408e+18	FALSE	High	IsMasterProtein	TGGT1_227920-t26_1-p1	transcript=TGGT1_227920-t26_1 | gene=TGGT1_227920 | organism=Toxoplasma_gondii_GT1 | gene_product=hypothetical protein | transcript_product=hypothetical protein | location=TGGT1_chrX:647805-649182(-) | protein_length=85 | sequence_SO=chromosome | SO=protein_coding_gene | is_pseudo=false	0	7.057	24	2	2	2	85	9.5	9.83	5.38	2	2.205	2.429	0.663	2.612	0.811	1.524	1.181	0.786	0.855	85.5	188.6	207.8	56.7	223.4	69.4	130.4	101	67.3	73.1	High	High	High	High	High	High	High	High	High	High	1
9.14973e+18	FALSE	High	IsMasterProtein	TGGT1_208320-t26_1-p1	transcript=TGGT1_208320-t26_1 | gene=TGGT1_208320 | organism=Toxoplasma_gondii_GT1 | gene_product=Polynucleotide kinase 3 phosphatase [Source:UniProtKB/TrEMBL;Acc:S7UJT1] | transcript_product=polynucleotide kinase 3 phosphatase | location=TGGT1_chrIb:624423-626967(+) | protein_length=703 | sequence_SO=chromosome | SO=protein_coding_gene | is_pseudo=false	0	12.267	5	2	3	2	703	77.3	8.43	9.48	2	1.164	1.181	0.791	0.659	0.448	0.387	0.358	0.36	0.236	85.7	99.8	101.3	67.9	56.5	38.4	33.2	30.7	30.9	20.3	High	High	High	High	High	High	High	High	High	High	1
6.20394e+17	FALSE	High	IsMasterProtein	TGGT1_228010-t26_1-p1	transcript=TGGT1_228010-t26_1 | gene=TGGT1_228010 | organism=Toxoplasma_gondii_GT1 | gene_product=MitMem_reg domain-containing protein [Source:UniProtKB/TrEMBL;Acc:S7UWZ9] | transcript_product=hypothetical protein | location=TGGT1_chrX:579787-586069(+) | protein_length=566 | sequence_SO=chromosome | SO=protein_coding_gene | is_pseudo=false	0.007	2.679	2	1	1	1	566	60.3	7.25	2.36	1	1.169	1.481	0.998	0.933	0.705	0.573	0.429	0.404	0.405	85.9	100.3	127.2	85.7	80.1	60.5	49.2	36.8	34.7	34.7	High	High	High	High	High	High	High	High	High	High	1
-1.23519e+18	FALSE	Low	IsMasterProtein	TGGT1_208070-t26_1-p1	transcript=TGGT1_208070-t26_1 | gene=TGGT1_208070 | organism=Toxoplasma_gondii_GT1 | gene_product=Kinase [Source:UniProtKB/TrEMBL;Acc:S7UIU8] | transcript_product=inositol polyphosphate kinase | location=TGGT1_chrIb:592752-603778(-) | protein_length=2851 | sequence_SO=chromosome | SO=protein_coding_gene | is_pseudo=false	0.055	1.246	0	1	1	1	2851	305.8	7.33	2.03	1	1.276	1.281	0.992	1.104	0.805	0.789	0.622	0.658	0.464	85.9	109.6	110	85.1	94.8	69.1	67.7	53.4	56.5	39.8	High	High	High	High	High	High	High	High	High	High	1
-3.59127e+17	FALSE	High	IsMasterProtein	TGGT1_262460-t26_1-p1	transcript=TGGT1_262460-t26_1 | gene=TGGT1_262460 | organism=Toxoplasma_gondii_GT1 | gene_product=PX domain-containing protein [Source:UniProtKB/TrEMBL;Acc:S7W6N6] | transcript_product=hypothetical protein | location=TGGT1_chrVIIb:1194549-1206000(+) | protein_length=2502 | sequence_SO=chromosome | SO=protein_coding_gene | is_pseudo=false	0	7.414	1	1	1	1	2502	274.1	7.8	5.56	1	1.413	1.475	1.269	1.134	0.916	0.758	0.627	0.639	0.58	86.1	121.6	126.9	109.2	97.6	78.9	65.2	54	55	49.9	High	High	High	High	High	High	High	High	High	High	1
-5.89668e+18	FALSE	High	IsMasterProtein	TGGT1_202620-t26_1-p1	transcript=TGGT1_202620-t26_1 | gene=TGGT1_202620 | organism=Toxoplasma_gondii_GT1 | gene_product=hypothetical protein | transcript_product=hypothetical protein | location=TGGT1_chrVIIa:3063678-3064673(-) | protein_length=331 | sequence_SO=chromosome | SO=protein_coding_gene | is_pseudo=false	0.001	6.09	8	2	2	2	331	36.1	9.47	5.23	2	1.327	1.475	0.93	1.179	0.828	0.861	0.752	0.723	0.771	86.2	114.3	127.1	80.2	101.6	71.3	74.2	64.8	62.3	66.4	High	High	High	High	High	High	High	High	High	High	1
1.98265e+18	FALSE	High	IsMasterProtein	TGGT1_315230-t26_1-p1	transcript=TGGT1_315230-t26_1 | gene=TGGT1_315230 | organism=Toxoplasma_gondii_GT1 | gene_product=hypothetical protein | transcript_product=hypothetical protein | location=TGGT1_chrXI:4540396-4542282(+) | protein_length=628 | sequence_SO=chromosome | SO=protein_coding_gene | is_pseudo=false	0	12.552	4	2	4	2	628	68.2	7.03	13.42	2	1.234	1.191	0.986	0.888	0.572	0.405	0.379	0.347	0.299	86.3	106.5	102.8	85.1	76.6	49.4	35	32.7	29.9	25.8	High	High	High	High	High	High	High	High	High	High	1
4.93229e+18	FALSE	High	IsMasterProtein	TGGT1_284570-t26_1-p1	transcript=TGGT1_284570-t26_1 | gene=TGGT1_284570 | organism=Toxoplasma_gondii_GT1 | gene_product=hypothetical protein | transcript_product=hypothetical protein | location=TGGT1_chrV:2557912-2560776(-) | protein_length=277 | sequence_SO=chromosome | SO=protein_coding_gene | is_pseudo=false	0	9.417	10	2	2	2	277	31.3	6.81	7.4	2	1.143	1.291	1.076	0.993	0.705	0.549	0.405	0.477	0.307	86.6	99	111.8	93.1	86	61.1	47.5	35.1	41.3	26.5	High	High	High	High	High	High	High	High	High	High	1
-6.50529e+18	FALSE	High	IsMasterProtein	TGGT1_206690-t26_1-p1	transcript=TGGT1_206690-t26_1 | gene=TGGT1_206690 | organism=Toxoplasma_gondii_GT1 | gene_product=Glideosome-associated protein with multiple-membrane spans GAPM2B [Source:UniProtKB/TrEMBL;Acc:A0A125YVU7] | transcript_product=glideosome-associated protein with multiple-membrane spans GAPM2B | location=TGGT1_chrVIIa:697425-699242(+) | protein_length=426 | sequence_SO=chromosome | SO=protein_coding…	0.001	6.496	4	1	2	1	426	46.8	5.15	6.3	1	1.244	1.419	1.085	1.274	1.154	1.066	1.012	1.109	0.712	86.7	107.8	123	94	110.4	100.1	92.4	87.7	96.2	61.7	High	High	High	High	High	High	High	High	High	High	1
6.38782e+18	FALSE	High	IsMasterProtein	TGGT1_211060-t26_1-p1	transcript=TGGT1_211060-t26_1 | gene=TGGT1_211060 | organism=Toxoplasma_gondii_GT1 | gene_product=hypothetical protein | transcript_product=hypothetical protein | location=TGGT1_chrIV:1873858-1874178(+) | protein_length=106 | sequence_SO=chromosome | SO=protein_coding_gene | is_pseudo=false	0	9.387	24	1	4	1	106	11.6	9.83	21.27	1	1.285	1.237	0.985	0.745	0.654	0.5	0.345	0.368	0.292	87	111.8	107.6	85.7	64.8	56.9	43.5	30	32	25.4	High	High	High	High	High	High	High	High	High	High	1
6.59954e+17	FALSE	High	IsMasterProtein	TGGT1_255870-t26_1-p1	transcript=TGGT1_255870-t26_1 | gene=TGGT1_255870 | organism=Toxoplasma_gondii_GT1 | gene_product=WD domain, G-beta repeat-containing protein [Source:UniProtKB/TrEMBL;Acc:S7UZ94] | transcript_product=WD domain, G-beta repeat-containing protein | location=TGGT1_chrVIIb:4584177-4586714(+) | protein_length=845 | sequence_SO=chromosome | SO=protein_coding_gene | is_pseudo=false	0.002	4.239	1	1	2	1	845	89.6	8	6.02	1	1.321	1.572	1.176	1.367	0.983	0.846	0.627	0.717	0.654	87.1	115.1	137	102.4	119.1	85.6	73.7	54.6	62.5	56.9	High	High	High	High	High	High	High	High	High	High	1
7.2492e+18	FALSE	Low	IsMasterProtein	TGGT1_232540-t26_1-p1	transcript=TGGT1_232540-t26_1 | gene=TGGT1_232540 | organism=Toxoplasma_gondii_GT1 | gene_product=FAD binding domain-containing protein [Source:UniProtKB/TrEMBL;Acc:S7V2W2] | transcript_product=FAD binding domain-containing protein | location=TGGT1_chrVIII:2144088-2151414(-) | protein_length=1205 | sequence_SO=chromosome | SO=protein_coding_gene | is_pseudo=false	0.068	1.113	0	1	1	1	1205	132.7	8.19	0	1	1.109	1.125	0.81	0.698	0.494	0.343	0.242	0.268	0.179	87.5	97	98.4	70.8	61	43.2	30	21.1	23.4	15.7	High	High	High	High	High	High	High	High	High	High	1
5.53946e+18	FALSE	High	IsMasterProtein	TGGT1_304650-t26_1-p1	transcript=TGGT1_304650-t26_1 | gene=TGGT1_304650 | organism=Toxoplasma_gondii_GT1 | gene_product=PPIP5K2_N domain-containing protein [Source:UniProtKB/TrEMBL;Acc:S7UTW0] | transcript_product=histidine acid phosphatase superfamily protein | location=TGGT1_chrVIIa:565293-584527(-) | protein_length=2917 | sequence_SO=chromosome | SO=protein_coding_gene | is_pseudo=false	0	21.978	2	4	7	4	2917	305.8	6.86	27.52	4	1.193	1.386	0.982	1.072	1.031	0.72	0.597	0.657	0.668	87.6	104.6	121.5	86	94	90.3	63.1	52.3	57.6	58.5	High	High	High	High	High	High	High	High	High	High	1
-8.95225e+18	FALSE	High	IsMasterProtein	TGGT1_265360-t26_1-p1	transcript=TGGT1_265360-t26_1 | gene=TGGT1_265360 | organism=Toxoplasma_gondii_GT1 | gene_product=hypothetical protein | transcript_product=hypothetical protein | location=TGGT1_chrIX:1425874-1428243(+) | protein_length=516 | sequence_SO=chromosome | SO=protein_coding_gene | is_pseudo=false	0	10.899	6	2	4	2	516	57.8	8.88	14.69	2	1.287	1.369	0.911	1.015	0.791	0.612	0.512	0.488	0.48	87.8	113	120.1	79.9	89.1	69.4	53.7	45	42.8	42.1	High	High	High	High	High	High	High	High	High	High	1
1.21263e+18	FALSE	High	IsMasterProtein	TGGT1_288240-t26_1-p1	transcript=TGGT1_288240-t26_1 | gene=TGGT1_288240 | organism=Toxoplasma_gondii_GT1 | gene_product=GRIP domain-containing protein [Source:UniProtKB/TrEMBL;Acc:S7W4K7] | transcript_product=hypothetical protein | location=TGGT1_chrIX:2217026-2219947(+) | protein_length=921 | sequence_SO=chromosome | SO=protein_coding_gene | is_pseudo=false	0	12.694	5	3	4	3	921	97.8	5.12	11.53	3	1.08	1.189	0.955	0.873	0.862	0.631	0.493	0.622	0.608	88	95	104.6	84	76.8	75.8	55.5	43.4	54.7	53.5	High	High	High	High	High	High	High	High	High	High	1
-8.08992e+18	FALSE	High	IsMasterProtein	TGGT1_281980-t26_1-p1	transcript=TGGT1_281980-t26_1 | gene=TGGT1_281980 | organism=Toxoplasma_gondii_GT1 | gene_product=Phosphatidate cytidylyltransferase [Source:UniProtKB/TrEMBL;Acc:S7WBC8] | transcript_product=phosphatidate cytidylyltransferase | location=TGGT1_chrVIIa:4205847-4209053(-) | protein_length=1068 | sequence_SO=chromosome | SO=protein_coding_gene | is_pseudo=false	0	13.697	4	3	3	3	1068	114.6	7.5	8.36	3	1.285	1.515	1.14	1.08	0.831	0.606	0.396	0.415	0.486	88.2	113.3	133.6	100.5	95.3	73.3	53.5	34.9	36.6	42.9	High	High	High	High	High	High	High	High	High	High	1
9.06204e+18	FALSE	High	IsMasterProtein	TGGT1_206340-t26_1-p1	transcript=TGGT1_206340-t26_1 | gene=TGGT1_206340 | organism=Toxoplasma_gondii_GT1 | gene_product=hypothetical protein | transcript_product=hypothetical protein | location=TGGT1_chrVIIa:1029487-1030626(-) | protein_length=187 | sequence_SO=chromosome | SO=protein_coding_gene | is_pseudo=false	0.001	4.524	9	1	3	1	187	20	4.86	11.41	1	1.316	1.369	1.025	1.171	0.92	0.867	0.684	0.725	0.686	88.7	116.8	121.5	90.9	103.9	81.6	76.9	60.7	64.3	60.8	High	High	High	High	High	High	High	High	High	High	1
2.9528e+17	FALSE	High	IsMasterProtein	TGGT1_261720-t26_1-p1	transcript=TGGT1_261720-t26_1 | gene=TGGT1_261720 | organism=Toxoplasma_gondii_GT1 | gene_product=Metal cation transporter, ZIP family protein [Source:UniProtKB/TrEMBL;Acc:A0A125YGA4] | transcript_product=metal cation transporter, ZIP family protein | location=TGGT1_chrVIIb:1541048-1544147(-) | protein_length=448 | sequence_SO=chromosome | SO=protein_coding_gene | is_pseudo=false	0.001	6.768	4	1	1	1	448	47.4	5.03	2.94	1	0.678	1.59	0.543	0.401	0.351	0.221	0.156	0.172	0.15	89	60.3	141.5	48.3	35.7	31.3	19.6	13.9	15.3	13.4	High	High	High	High	High	High	High	High	High	High	1
2.01158e+18	FALSE	High	IsMasterProtein	TGGT1_287980-t26_1-p1	transcript=TGGT1_287980-t26_1 | gene=TGGT1_287980 | organism=Toxoplasma_gondii_GT1 | gene_product=FHA domain-containing protein [Source:UniProtKB/TrEMBL;Acc:S7VY20] | transcript_product=FHA domain-containing protein | location=TGGT1_chrIX:2088909-2097069(-) | protein_length=1141 | sequence_SO=chromosome | SO=protein_coding_gene | is_pseudo=false	0	14.58	4	3	4	3	1141	118.1	5.77	13.99	3	1.269	1.473	1.004	1.085	0.805	0.563	0.548	0.516	0.483	89.4	113.5	131.7	89.8	97.1	72	50.3	49	46.1	43.2	High	High	High	High	High	High	High	High	High	High	1
6.4548e+18	FALSE	High	IsMasterProtein	TGGT1_259640-t26_1-p1	transcript=TGGT1_259640-t26_1 | gene=TGGT1_259640 | organism=Toxoplasma_gondii_GT1 | gene_product=Peptidase S59 domain-containing protein [Source:UniProtKB/TrEMBL;Acc:S7UYU4] | transcript_product=nucleoporin autopeptidase | location=TGGT1_chrVIIb:2709338-2721341(-) | protein_length=2894 | sequence_SO=chromosome | SO=protein_coding_gene | is_pseudo=false	0	13.856	2	3	4	3	2894	302.1	6.65	11.74	3	1.377	1.61	1.075	1.341	0.771	0.857	0.765	0.685	0.714	89.7	123.6	144.5	96.5	120.3	69.2	76.9	68.6	61.5	64.1	High	High	High	High	High	High	High	High	High	High	1
-9.22223e+18	FALSE	High	IsMasterProtein	TGGT1_238040B-t26_1-p1	transcript=TGGT1_238040B-t26_1 | gene=TGGT1_238040B | organism=Toxoplasma_gondii_GT1 | gene_product=Thioredoxin domain-containing protein [Source:UniProtKB/TrEMBL;Acc:S7UQV0] | transcript_product=protein disulfide-isomerase domain-containing protein | location=TGGT1_chrVI:18696-19445(-) | protein_length=203 | sequence_SO=chromosome | SO=protein_coding_gene | is_pseudo=false	0	26.076	35	4	4	1	203	22.6	7.49	16.81	4	1.069	1.196	0.977	0.773	0.714	0.483	0.427	0.459	0.424	90	96.2	107.6	87.9	69.5	64.3	43.4	38.4	41.3	38.1	High	High	High	High	High	High	High	High	High	High	1
3.49102e+18	FALSE	High	IsMasterProtein	TGGT1_312670-t26_1-p1	transcript=TGGT1_312670-t26_1 | gene=TGGT1_312670 | organism=Toxoplasma_gondii_GT1 | gene_product=hypothetical protein | transcript_product=hypothetical protein | location=TGGT1_chrXI:2857960-2861467(-) | protein_length=636 | sequence_SO=chromosome | SO=protein_coding_gene | is_pseudo=false	0.001	6.006	3	2	2	2	636	67	7.11	4.73	2	1.201	1.275	0.834	0.994	0.705	0.581	0.601	0.586	0.571	90.2	108.4	115	75.2	89.6	63.6	52.4	54.2	52.8	51.6	High	High	High	High	High	High	High	High	High	High	1
-4.04047e+18	FALSE	High	IsMasterProtein	TGGT1_293190-t26_1-p1	transcript=TGGT1_293190-t26_1 | gene=TGGT1_293190 | organism=Toxoplasma_gondii_GT1 | gene_product=IPPc domain-containing protein [Source:UniProtKB/TrEMBL;Acc:A0A125YFF1] | transcript_product=endonuclease/exonuclease/phosphatase family protein | location=TGGT1_chrIa:133494-141236(+) | protein_length=682 | sequence_SO=chromosome | SO=protein_coding_gene | is_pseudo=false	0.002	4.246	1	1	2	1	682	76.2	5.47	5.29	1	1.161	1.264	1.12	0.956	0.696	0.618	0.512	0.413	0.311	90.5	105	114.4	101.3	86.5	63	55.9	46.3	37.3	28.1	High	High	High	High	High	High	High	High	High	High	1
2.08442e+18	FALSE	High	IsMasterProtein	TGGT1_311100-t26_1-p1	transcript=TGGT1_311100-t26_1 | gene=TGGT1_311100 | organism=Toxoplasma_gondii_GT1 | gene_product=Zinc finger (CCCH type) motif-containing protein [Source:UniProtKB/TrEMBL;Acc:S7UU40] | transcript_product=zinc finger (CCCH type) motif-containing protein | location=TGGT1_chrXI:1771325-1774934(+) | protein_length=919 | sequence_SO=chromosome | SO=protein_coding_gene | is_pseudo=false	0	8.869	3	2	2	2	919	98.7	8.6	6.28	2	1.196	1.401	1.09	1.097	0.817	0.758	0.62	0.753	0.557	90.8	108.6	127.2	99	99.6	74.2	68.8	56.3	68.4	50.6	High	High	High	High	High	High	High	High	High	High	1
3.69191e+18	FALSE	High	IsMasterProtein	TGGT1_261260B-t26_1-p1	transcript=TGGT1_261260B-t26_1 | gene=TGGT1_261260B | organism=Toxoplasma_gondii_GT1 | gene_product=Histone lysine demethylase JMJD6a [Source:UniProtKB/TrEMBL;Acc:S7WE60] | transcript_product=histone lysine demethylase JMJD6a | location=TGGT1_chrVIIb:1768608-1769345(-) | protein_length=245 | sequence_SO=chromosome | SO=protein_coding_gene | is_pseudo=false	0.003	3.74	4	1	1	1	245	25.7	4.79	2.54	1	1.132	1.338	0.84	0.901	0.723	0.454	0.377	0.463	0.425	90.9	102.9	121.7	76.3	81.9	65.7	41.3	34.3	42.1	38.6	High	High	High	High	High	High	High	High	High	High	1
4.54895e+18	FALSE	High	IsMasterProtein	TGGT1_212950-t26_1-p1	transcript=TGGT1_212950-t26_1 | gene=TGGT1_212950 | organism=Toxoplasma_gondii_GT1 | gene_product=Putative ADP-ribosylation factor family protein 2 [Source:UniProtKB/TrEMBL;Acc:A0A125YQC1] | transcript_product=putative ADP-ribosylation factor family protein 2 | location=TGGT1_chrV:589943-592814(+) | protein_length=185 | sequence_SO=chromosome | SO=protein_coding_gene | is_pseudo=false	0.002	4.468	6	1	1	1	185	21	6.8	3.3	1	1.2	1.45	0.923	1.012	0.702	0.461	0.367	0.378	0.279	91.2	109.5	132.3	84.2	92.3	64	42	33.5	34.5	25.5	High	High	High	High	High	High	High	High	High	High	1
2.04801e+17	FALSE	High	IsMasterProtein	TGGT1_249620-t26_1-p1	transcript=TGGT1_249620-t26_1 | gene=TGGT1_249620 | organism=Toxoplasma_gondii_GT1 | gene_product=Hist_deacetyl domain-containing protein [Source:UniProtKB/TrEMBL;Acc:S7W8W1] | transcript_product=histone deacetylase HDAC2 | location=TGGT1_chrXII:4629840-4636950(+) | protein_length=624 | sequence_SO=chromosome | SO=protein_coding_gene | is_pseudo=false	0.003	3.909	2	1	1	1	624	67.5	5.26	3.15	1	1.093	1.169	0.942	0.775	0.756	0.412	0.337	0.423	0.479	91.3	99.8	106.7	86	70.7	69	37.6	30.8	38.6	43.7	High	High	High	High	High	High	High	High	High	High	1
-8.23697e+18	FALSE	High	IsMasterProtein	TGGT1_309910-t26_1-p1	transcript=TGGT1_309910-t26_1 | gene=TGGT1_309910 | organism=Toxoplasma_gondii_GT1 | gene_product=Aa_trans domain-containing protein [Source:UniProtKB/TrEMBL;Acc:S7USW0] | transcript_product=hypothetical protein | location=TGGT1_chrXI:854394-862174(-) | protein_length=2131 | sequence_SO=chromosome | SO=protein_coding_gene | is_pseudo=false	0	25.058	3	5	7	5	2131	226.5	6.07	18.46	5	1.073	1.293	0.906	0.961	0.929	0.693	0.617	0.616	0.646	91.4	98.1	118.2	82.8	87.9	84.9	63.4	56.4	56.3	59	High	High	High	High	High	High	High	High	High	High	1
-8.34818e+18	FALSE	High	IsMasterProtein	TGGT1_244180-t26_1-p1	transcript=TGGT1_244180-t26_1 | gene=TGGT1_244180 | organism=Toxoplasma_gondii_GT1 | gene_product=Microneme-like protein [Source:UniProtKB/TrEMBL;Acc:S7VTY1] | transcript_product=microneme-like protein | location=TGGT1_chrVI:3005692-3007845(-) | protein_length=717 | sequence_SO=chromosome | SO=protein_coding_gene | is_pseudo=false	0.002	4.456	2	1	1	1	717	76	4.82	3.53	1	1.131	1.334	1.021	0.86	0.821	0.736	0.648	0.674	0.66	92	104	122.7	93.9	79.1	75.5	67.7	59.6	62	60.7	High	High	High	High	High	High	High	High	High	High	1
-8.21596e+18	FALSE	High	IsMasterProtein	TGGT1_253020-t26_1-p1	transcript=TGGT1_253020-t26_1 | gene=TGGT1_253020 | organism=Toxoplasma_gondii_GT1 | gene_product=hypothetical protein | transcript_product=hypothetical protein | location=TGGT1_chrIII:661421-667137(-) | protein_length=466 | sequence_SO=chromosome | SO=protein_coding_gene | is_pseudo=false	0.001	6.58	2	1	2	1	466	51.6	5.64	5.39	1	1.209	1.377	0.913	1.089	0.875	0.617	0.545	0.551	0.69	92	111.2	126.7	84	100.2	80.5	56.7	50.1	50.7	63.4	High	High	High	High	High	High	High	High	High	High	1
-8.91619e+18	FALSE	High	IsMasterProtein	TGGT1_221580-t26_1-p1	transcript=TGGT1_221580-t26_1 | gene=TGGT1_221580 | organism=Toxoplasma_gondii_GT1 | gene_product=FtsJ domain-containing protein [Source:UniProtKB/TrEMBL;Acc:S7ULK0] | transcript_product=ribosomal RNA large subunit methyltransferase J protein | location=TGGT1_chrII:434837-447724(+) | protein_length=2180 | sequence_SO=chromosome | SO=protein_coding_gene | is_pseudo=false	0.001	4.539	1	2	2	2	2180	233.5	6.71	4.35	2	1.37	1.334	0.87	1.215	0.686	0.763	0.625	0.537	0.506	92	126	122.7	80.1	111.7	63.1	70.2	57.5	49.4	46.6	High	High	High	High	High	High	High	High	High	High	1
1.2288e+18	FALSE	High	IsMasterProtein	TGGT1_212840-t26_1-p1	transcript=TGGT1_212840-t26_1 | gene=TGGT1_212840 | organism=Toxoplasma_gondii_GT1 | gene_product=HIT-type domain-containing protein [Source:UniProtKB/TrEMBL;Acc:S7VX77] | transcript_product=HIT zinc finger protein | location=TGGT1_chrV:509275-514927(-) | protein_length=588 | sequence_SO=chromosome | SO=protein_coding_gene | is_pseudo=false	0	9.807	4	2	4	2	588	64.5	5.47	12.89	2	1.219	1.29	0.968	0.986	0.909	0.748	0.6	0.551	0.524	92.4	112.7	119.3	89.4	91.1	84	69.2	55.5	50.9	48.4	High	High	High	High	High	High	High	High	High	High	1
4.82601e+18	FALSE	High	IsMasterProtein	TGGT1_269200-t26_1-p1	transcript=TGGT1_269200-t26_1 | gene=TGGT1_269200 | organism=Toxoplasma_gondii_GT1 | gene_product=Putative crooked neck family 1 protein isoform 2 [Source:UniProtKB/TrEMBL;Acc:S7V4C3] | transcript_product=putative crooked neck family 1 protein isoform 2 | location=TGGT1_chrVIII:5988095-5997726(-) | protein_length=686 | sequence_SO=chromosome | SO=protein_coding_gene | is_pseudo=false	0	10.432	3	2	5	2	686	81.6	8.28	12.84	2	1.194	1.291	0.921	0.751	0.619	0.442	0.385	0.389	0.385	92.4	110.4	119.4	85.1	69.5	57.2	40.8	35.6	35.9	35.6	High	High	High	High	High	High	High	High	High	High	1
-8.40529e+17	FALSE	High	IsMasterProtein	TGGT1_319610-t26_1-p1	transcript=TGGT1_319610-t26_1 | gene=TGGT1_319610 | organism=Toxoplasma_gondii_GT1 | gene_product=eIF2 kinase IF2K-D (Incomplete catalytic triad) [Source:UniProtKB/TrEMBL;Acc:S7VSV8] | transcript_product=eIF2 kinase IF2K-D (incomplete catalytic triad) | location=TGGT1_chrIV:783142-801696(+) | protein_length=2886 | sequence_SO=chromosome | SO=protein_coding_gene | is_pseudo=false	0.006	2.821	1	1	4	1	2886	305.3	7.85	7.29	1	1.13	1.115	0.86	0.964	0.601	0.516	0.466	0.325	0.441	92.6	104.7	103.3	79.7	89.3	55.7	47.8	43.2	30.1	40.9	High	High	High	High	High	High	High	High	High	High	1
1.37579e+18	FALSE	High	IsMasterProtein	TGGT1_202010-t26_1-p1	transcript=TGGT1_202010-t26_1 | gene=TGGT1_202010 | organism=Toxoplasma_gondii_GT1 | gene_product=hypothetical protein | transcript_product=hypothetical protein | location=TGGT1_chrVIIa:3608764-3611773(+) | protein_length=857 | sequence_SO=chromosome | SO=protein_coding_gene | is_pseudo=false	0.003	3.731	3	2	2	2	857	91.2	8.47	5.21	2	1.177	1.352	1.039	0.948	0.994	0.668	0.555	0.631	0.621	93.4	109.8	126.2	97	88.5	92.8	62.3	51.8	58.9	58	High	High	High	High	High	High	High	High	High	High	1
3.55765e+18	FALSE	High	IsMasterProtein	TGGT1_312380-t26_1-p1	transcript=TGGT1_312380-t26_1 | gene=TGGT1_312380 | organism=Toxoplasma_gondii_GT1 | gene_product=TPR_REGION domain-containing protein [Source:UniProtKB/TrEMBL;Acc:S7UTF8] | transcript_product=tetratricopeptide repeat-containing protein | location=TGGT1_chrXI:2610628-2618304(+) | protein_length=542 | sequence_SO=chromosome | SO=protein_coding_gene | is_pseudo=false	0	9.434	7	3	5	3	542	59.6	6.15	10.79	3	1.044	1.179	1.011	0.816	0.82	0.471	0.427	0.465	0.359	93.4	97.4	110	94.4	76.2	76.6	43.9	39.8	43.4	33.6	High	High	High	High	High	High	High	High	High	High	1
-1.70715e+18	FALSE	Low	IsMasterProtein	TGGT1_314920-t26_1-p1	transcript=TGGT1_314920-t26_1 | gene=TGGT1_314920 | organism=Toxoplasma_gondii_GT1 | gene_product=hypothetical protein | transcript_product=hypothetical protein | location=TGGT1_chrXI:4358172-4371476(+) | protein_length=3257 | sequence_SO=chromosome | SO=protein_coding_gene | is_pseudo=false	0.06	1.197	0	1	1	1	3257	344.8	8.6	2.56	1	1.09	1.32	0.738	0.962	0.538	0.337	0.199	0.301	0.31	93.4	101.7	123.3	68.9	89.8	50.2	31.5	18.6	28.1	29	High	High	High	High	High	High	High	High	High	High	1
-8.86854e+18	FALSE	High	IsMasterProtein	TGGT1_285750-t26_1-p1	transcript=TGGT1_285750-t26_1 | gene=TGGT1_285750 | organism=Toxoplasma_gondii_GT1 | gene_product=6,7-dihydropteridine reductase [Source:UniProtKB/TrEMBL;Acc:S7VWK1] | transcript_product=6,7-dihydropteridine reductase | location=TGGT1_chrV:2108594-2111262(+) | protein_length=460 | sequence_SO=chromosome | SO=protein_coding_gene | is_pseudo=false	0.001	6.574	4	1	1	1	460	50.1	8.44	4.3	1	1.288	1.336	0.948	0.912	0.696	0.507	0.412	0.553	0.426	93.7	120.7	125.2	88.8	85.5	65.2	47.5	38.6	51.8	39.9	High	High	High	High	High	High	High	High	High	High	1
8.78787e+18	FALSE	High	IsMasterProtein	TGGT1_252210-t26_1-p1	transcript=TGGT1_252210-t26_1 | gene=TGGT1_252210 | organism=Toxoplasma_gondii_GT1 | gene_product=PPR_long domain-containing protein [Source:UniProtKB/TrEMBL;Acc:S7W2F8] | transcript_product=pentatricopeptide repeat domain-containing protein | location=TGGT1_chrIII:378447-385902(-) | protein_length=1904 | sequence_SO=chromosome | SO=protein_coding_gene | is_pseudo=false	0.001	6.065	1	2	3	2	1904	201.2	6.87	5.93	2	0.913	1.157	0.995	0.741	0.744	0.595	0.511	0.507	0.508	94.1	85.9	108.9	93.7	69.7	70	56	48.1	47.7	47.8	High	High	High	High	High	High	High	High	High	High	1
8.3576e+18	FALSE	High	IsMasterProtein	TGGT1_264870-t26_1-p1	transcript=TGGT1_264870-t26_1 | gene=TGGT1_264870 | organism=Toxoplasma_gondii_GT1 | gene_product=Sodium:neurotransmitter symporter family protein [Source:UniProtKB/TrEMBL;Acc:S7VV37] | transcript_product=Sodium:neurotransmitter symporter family protein | location=TGGT1_chrIX:1763311-1766424(+) | protein_length=1037 | sequence_SO=chromosome | SO=protein_coding_gene | is_pseudo=false	0.001	4.837	1	1	3	1	1037	108.9	8.03	8.66	1	1.34	1.519	1.018	1.03	0.813	0.664	0.681	0.611	0.639	94.1	126.1	142.9	95.8	96.9	76.5	62.5	64	57.5	60.1	High	High	High	High	High	High	High	High	High	High	1
-5.43251e+18	FALSE	High	IsMasterProtein	TGGT1_314390-t26_1-p1	transcript=TGGT1_314390-t26_1 | gene=TGGT1_314390 | organism=Toxoplasma_gondii_GT1 | gene_product=hypothetical protein | transcript_product=hypothetical protein | location=TGGT1_chrXI:4017631-4021934(-) | protein_length=939 | sequence_SO=chromosome | SO=protein_coding_gene | is_pseudo=false	0	19.039	4	3	5	3	939	99.1	4.89	17.15	3	1.115	1.388	1.103	1.218	1.143	0.888	0.812	0.881	0.993	94.1	105	130.6	103.8	114.6	107.5	83.6	76.4	82.9	93.5	High	High	High	High	High	High	High	High	High	High	1
-5.86612e+18	FALSE	High	IsMasterProtein	TGGT1_273990-t26_1-p1	transcript=TGGT1_273990-t26_1 | gene=TGGT1_273990 | organism=Toxoplasma_gondii_GT1 | gene_product=cobW domain-containing protein [Source:UniProtKB/TrEMBL;Acc:S7WCJ7] | transcript_product=CobW/P47K family protein | location=TGGT1_chrVIII:3127369-3129381(-) | protein_length=670 | sequence_SO=chromosome | SO=protein_coding_gene | is_pseudo=false	0.001	6.773	3	2	2	2	670	72.7	5.03	5.34	2	1.206	1.293	1.257	0.916	1.018	0.922	0.73	0.94	0.682	94.2	113.6	121.8	118.4	86.2	95.9	86.8	68.8	88.6	64.2	High	High	High	High	High	High	High	High	High	High	1
-8.32148e+18	FALSE	High	IsMasterProtein	TGGT1_301430-t26_1-p1	transcript=TGGT1_301430-t26_1 | gene=TGGT1_301430 | organism=Toxoplasma_gondii_GT1 | gene_product=Putative septum formation protein maf [Source:UniProtKB/TrEMBL;Acc:S7UGJ6] | transcript_product=putative septum formation protein maf | location=TGGT1_chrIV:2359748-2361934(+) | protein_length=390 | sequence_SO=chromosome | SO=protein_coding_gene | is_pseudo=false	0	11.438	7	2	3	2	390	42.2	7.77	9.82	2	1.17	1.367	0.957	1.121	1.12	1.015	0.813	0.977	0.935	94.3	110.3	128.9	90.2	105.7	105.6	95.7	76.7	92.1	88.2	High	High	High	High	High	High	High	High	High	High	1
-2.07179e+18	FALSE	High	IsMasterProtein	TGGT1_313240-t26_1-p1	transcript=TGGT1_313240-t26_1 | gene=TGGT1_313240 | organism=Toxoplasma_gondii_GT1 | gene_product=Putative ethylene-responsive RNA helicase [Source:UniProtKB/TrEMBL;Acc:S7W881] | transcript_product=putative ethylene-responsive RNA helicase | location=TGGT1_chrXI:3172908-3178231(+) | protein_length=784 | sequence_SO=chromosome | SO=protein_coding_gene | is_pseudo=false	0.002	4.159	2	1	1	1	784	85.5	8.92	3.67	1	1.213	1.405	1.051	0.863	0.779	0.462	0.461	0.468	0.416	94.5	114.6	132.8	99.4	81.5	73.6	43.7	43.6	44.2	39.4	High	High	High	High	High	High	High	High	High	High	1
-5.80763e+16	FALSE	High	IsMasterProtein	TGGT1_310290-t26_1-p1	transcript=TGGT1_310290-t26_1 | gene=TGGT1_310290 | organism=Toxoplasma_gondii_GT1 | gene_product=Regulator of chromosome condensation (RCC1) repeat-containing protein [Source:UniProtKB/TrEMBL;Acc:S7US89] | transcript_product=regulator of chromosome condensation (RCC1) repeat-containing protein | location=TGGT1_chrXI:1194540-1202441(-) | protein_length=759 | sequence_SO=chromosome | SO=protein_co…	0	17.385	7	2	3	2	759	80.3	8.69	18.39	2	1.363	1.631	1.232	1.062	1.034	0.807	0.601	0.692	0.542	94.6	128.9	154.3	116.6	100.5	97.8	76.3	56.9	65.5	51.3	High	High	High	High	High	High	High	High	High	High	1
-5.34516e+18	FALSE	High	IsMasterProtein	TGGT1_220390-t26_1-p1	transcript=TGGT1_220390-t26_1 | gene=TGGT1_220390 | organism=Toxoplasma_gondii_GT1 | gene_product=hypothetical protein | transcript_product=hypothetical protein | location=TGGT1_chrV:248814-251802(+) | protein_length=274 | sequence_SO=chromosome | SO=protein_coding_gene | is_pseudo=false	0	11.283	9	2	3	2	274	29.2	8.72	11.86	2	1.092	1.379	0.99	0.977	0.935	0.695	0.546	0.54	0.633	94.7	103.4	130.6	93.8	92.6	88.6	65.9	51.7	51.2	59.9	High	High	High	High	High	High	High	High	High	High	1
6.79535e+18	FALSE	High	IsMasterProtein	TGGT1_205030-t26_1-p1	transcript=TGGT1_205030-t26_1 | gene=TGGT1_205030 | organism=Toxoplasma_gondii_GT1 | gene_product=t-SNARE coiled-coil homology domain-containing protein [Source:UniProtKB/TrEMBL;Acc:S7UUX1] | transcript_product=hypothetical protein | location=TGGT1_chrVIIa:1577188-1578694(+) | protein_length=113 | sequence_SO=chromosome | SO=protein_coding_gene | is_pseudo=false	0	17.82	19	1	7	1	113	13.1	7.14	33.4	1	1.077	1.346	0.912	1.019	0.805	0.814	0.714	0.661	0.712	95	102.3	127.9	86.6	96.8	76.5	77.3	67.8	62.8	67.6	High	High	High	High	High	High	High	High	High	High	1
8.11794e+18	FALSE	Medium	IsMasterProtein	TGGT1_268300-t26_1-p1	transcript=TGGT1_268300-t26_1 | gene=TGGT1_268300 | organism=Toxoplasma_gondii_GT1 | gene_product=hypothetical protein | transcript_product=hypothetical protein | location=TGGT1_chrVIII:6556944-6558048(-) | protein_length=124 | sequence_SO=chromosome | SO=protein_coding_gene | is_pseudo=false	0.011	2.3	6	1	2	1	124	14.2	9.1	3.99	1	1.177	1.431	0.88	1.23	1.14	1.064	0.97	1.03	1.127	95.5	112.4	136.6	84	117.4	108.8	101.5	92.6	98.3	107.6	High	High	High	High	High	High	High	High	High	High	1
-5.55417e+18	FALSE	High	IsMasterProtein	TGGT1_236930-t26_1-p1	transcript=TGGT1_236930-t26_1 | gene=TGGT1_236930 | organism=Toxoplasma_gondii_GT1 | gene_product=hypothetical protein | transcript_product=hypothetical protein | location=TGGT1_chrX:5467725-5489270(-) | protein_length=5651 | sequence_SO=chromosome | SO=protein_coding_gene | is_pseudo=false	0	11.169	1	2	2	2	5651	609.6	6.33	6.11	2	1.15	1.331	0.965	1.161	0.972	0.669	0.56	0.517	0.402	95.5	109.8	127.1	92.1	110.9	92.8	63.9	53.5	49.4	38.4	High	High	High	High	High	High	High	High	High	High	1
-8.42669e+17	FALSE	High	IsMasterProtein	TGGT1_272340-t26_1-p1	transcript=TGGT1_272340-t26_1 | gene=TGGT1_272340 | organism=Toxoplasma_gondii_GT1 | gene_product=Sde2_N_Ubi domain-containing protein [Source:UniProtKB/TrEMBL;Acc:S7WJI1] | transcript_product=hypothetical protein | location=TGGT1_chrVIII:4062889-4066981(+) | protein_length=684 | sequence_SO=chromosome | SO=protein_coding_gene | is_pseudo=false	0	16.044	3	1	3	1	684	74.4	8.19	15.05	1	1.185	1.449	0.944	1.348	1.171	0.954	0.927	0.857	0.877	96.1	113.9	139.3	90.7	129.6	112.5	91.7	89.1	82.3	84.2	High	High	High	High	High	High	High	High	High	High	1
5.74533e+18	FALSE	High	IsMasterProtein	TGGT1_210095-t26_1-p1	transcript=TGGT1_210095-t26_1 | gene=TGGT1_210095 | organism=Toxoplasma_gondii_GT1 | gene_product=hypothetical protein | transcript_product=hypothetical protein | location=TGGT1_chrIb:1629844-1631103(-) | protein_length=365 | sequence_SO=chromosome | SO=protein_coding_gene | is_pseudo=false	0	18.351	11	3	4	1	365	38.6	8.75	13.68	3	1.3	1.831	1.248	1.559	1.086	0.952	0.8	0.543	0.388	96.2	125.1	176.2	120.1	150	104.5	91.6	77	52.2	37.4	High	High	High	High	High	High	High	High	High	High	1
4.84525e+18	FALSE	High	IsMasterProtein	TGGT1_254090-t26_1-p1	transcript=TGGT1_254090-t26_1 | gene=TGGT1_254090 | organism=Toxoplasma_gondii_GT1 | gene_product=Cytochrome b5 heme-binding domain-containing protein [Source:UniProtKB/TrEMBL;Acc:S7VVH1] | transcript_product=hypothetical protein | location=TGGT1_chrIII:1424689-1426827(-) | protein_length=712 | sequence_SO=chromosome | SO=protein_coding_gene | is_pseudo=false	0.001	5.929	3	2	5	2	712	74.8	6.57	9.64	2	1.03	1.302	0.986	0.904	1.095	0.803	0.731	0.829	0.969	96.2	99.1	125.3	94.9	87	105.3	77.2	70.4	79.8	93.2	High	High	High	High	High	High	High	High	High	High	1
3.60268e+18	FALSE	High	IsMasterProtein	TGGT1_275460-t26_1-p1	transcript=TGGT1_275460-t26_1 | gene=TGGT1_275460 | organism=Toxoplasma_gondii_GT1 | gene_product=hypothetical protein | transcript_product=hypothetical protein | location=TGGT1_chrX:7169796-7170653(+) | protein_length=285 | sequence_SO=chromosome | SO=protein_coding_gene | is_pseudo=false	0	32.014	22	2	4	2	285	30.7	6.19	23.5	2	1.222	1.284	1.094	0.931	0.683	0.704	0.493	0.497	0.461	96.3	117.7	123.7	105.4	89.6	65.8	67.8	47.5	47.8	44.4	High	High	High	High	High	High	High	High	High	High	1
-5.27656e+18	FALSE	High	IsMasterProtein	TGGT1_304630-t26_1-p1	transcript=TGGT1_304630-t26_1 | gene=TGGT1_304630 | organism=Toxoplasma_gondii_GT1 | gene_product=ATG C terminal domain-containing protein [Source:UniProtKB/TrEMBL;Acc:S7W9P3] | transcript_product=ATG C terminal domain-containing protein | location=TGGT1_chrVIIa:524945-552364(+) | protein_length=8080 | sequence_SO=chromosome | SO=protein_coding_gene | is_pseudo=false	0.002	4.108	0	2	2	2	8080	874.3	6.99	4.34	2	1.256	1.338	1.052	1.038	0.964	0.774	0.756	0.749	0.751	96.4	121.1	129	101.4	100.1	92.9	74.6	72.9	72.2	72.4	High	High	High	High	High	High	High	High	High	High	1
-3.97294e+18	FALSE	High	IsMasterProtein	TGGT1_239630-t26_1-p1	transcript=TGGT1_239630-t26_1 | gene=TGGT1_239630 | organism=Toxoplasma_gondii_GT1 | gene_product=Cytidine and deoxycytidylate deaminase zinc-binding region domain-containing protein [Source:UniProtKB/TrEMBL;Acc:S7W6H2] | transcript_product=cytidine and deoxycytidylate deaminase zinc-binding region domain-containing protein | location=TGGT1_chrVI:807294-810888(+) | protein_length=445 | sequence_S…	0.001	5.416	3	1	4	1	445	47.4	6.8	12.95	1	1.031	1.162	0.793	0.787	0.749	0.39	0.278	0.48	0.379	96.5	99.5	112.1	76.5	76	72.3	37.6	26.9	46.3	36.5	High	High	High	High	High	High	High	High	High	High	1
-2.17155e+18	FALSE	High	IsMasterProtein	TGGT1_268650-t26_1-p1	transcript=TGGT1_268650-t26_1 | gene=TGGT1_268650 | organism=Toxoplasma_gondii_GT1 | gene_product=Putative chaperone clpB protein [Source:UniProtKB/TrEMBL;Acc:S7V473] | transcript_product=putative chaperone clpB protein | location=TGGT1_chrVIII:6373151-6376424(+) | protein_length=1020 | sequence_SO=chromosome | SO=protein_coding_gene | is_pseudo=false	0	9.919	3	3	4	2	1020	113.3	6.55	9.26	3	1.167	1.311	0.861	0.871	0.644	0.528	0.443	0.467	0.443	96.8	112.9	126.9	83.3	84.2	62.3	51	42.9	45.1	42.8	High	High	High	High	High	High	High	High	High	High	1
-2.11235e+18	FALSE	High	IsMasterProtein	TGGT1_247980-t26_1-p1	transcript=TGGT1_247980-t26_1 | gene=TGGT1_247980 | organism=Toxoplasma_gondii_GT1 | gene_product=Dolichyl-diphosphooligosaccharide-protein glycosyltransferase subunit OST5 [Source:UniProtKB/TrEMBL;Acc:S7W9Y6] | transcript_product=hypothetical protein | location=TGGT1_chrXII:3584208-3584570(-) | protein_length=120 | sequence_SO=chromosome | SO=protein_coding_gene | is_pseudo=false	0.002	4.39	9	1	1	1	120	13	10.49	3.09	1	1.294	1.494	1.019	1.428	1.069	0.792	0.587	0.753	0.956	96.9	125.4	144.8	98.8	138.4	103.7	76.8	56.9	73	92.7	High	High	High	High	High	High	High	High	High	High	1
-7.73921e+18	FALSE	Medium	IsMasterProtein	TGGT1_260540-t26_1-p1	transcript=TGGT1_260540-t26_1 | gene=TGGT1_260540 | organism=Toxoplasma_gondii_GT1 | gene_product=Alveolin domain containing intermediate filament IMC14 [Source:UniProtKB/TrEMBL;Acc:S7UYY7] | transcript_product=alveolin domain containing intermediate filament IMC14 | location=TGGT1_chrVIIb:2144399-2148137(+) | protein_length=733 | sequence_SO=chromosome | SO=protein_coding_gene | is_pseudo=false	0.019	1.86	1	1	1	1	733	83.3	8.44	2.1	1	1.206	1.369	1.103	1.195	0.963	0.853	0.581	0.58	0.534	96.9	116.9	132.7	106.9	115.9	93.4	82.7	56.3	56.3	51.7	High	High	High	High	High	High	High	High	High	High	1
-6.80562e+18	FALSE	Medium	IsMasterProtein	TGGT1_205200-t26_1-p1	transcript=TGGT1_205200-t26_1 | gene=TGGT1_205200 | organism=Toxoplasma_gondii_GT1 | gene_product=hypothetical protein | transcript_product=hypothetical protein | location=TGGT1_chrVIIa:1458781-1462626(-) | protein_length=1281 | sequence_SO=chromosome | SO=protein_coding_gene | is_pseudo=false	0.019	1.842	1	1	1	1	1281	138.7	9.09	0	1	1.067	1.413	0.84	1.022	0.721	0.39	0.342	0.215	0.209	97	103.5	137.1	81.5	99.2	69.9	37.9	33.2	20.9	20.3	High	High	High	High	High	High	High	High	High	High	1
7.31694e+18	FALSE	Medium	IsMasterProtein	TGGT1_269940-t26_1-p1	transcript=TGGT1_269940-t26_1 | gene=TGGT1_269940 | organism=Toxoplasma_gondii_GT1 | gene_product=ASCH domain-containing protein [Source:UniProtKB/TrEMBL;Acc:S7V3Y0] | transcript_product=zinc finger motif, C2HC5-type protein | location=TGGT1_chrVIII:5507751-5513794(+) | protein_length=1191 | sequence_SO=chromosome | SO=protein_coding_gene | is_pseudo=false	0.022	1.803	1	1	1	1	1191	132.7	5.58	1.77	1	0.915	1.375	0.839	0.708	0.584	0.558	0.458	0.452	0.386	97.4	89.1	133.9	81.7	69	56.9	54.3	44.6	44.1	37.6	High	High	High	High	High	High	High	High	High	High	1
-8.97416e+18	FALSE	High	IsMasterProtein	TGGT1_271910-t26_1-p1	transcript=TGGT1_271910-t26_1 | gene=TGGT1_271910 | organism=Toxoplasma_gondii_GT1 | gene_product=J domain-containing protein [Source:UniProtKB/TrEMBL;Acc:S7V3N8] | transcript_product=DnaJ domain-containing protein | location=TGGT1_chrVIII:4288083-4290069(+) | protein_length=520 | sequence_SO=chromosome | SO=protein_coding_gene | is_pseudo=false	0	9.313	4	2	2	2	520	56.2	8.37	5.47	2	1.279	1.351	0.926	1.188	0.745	0.907	0.751	0.655	0.622	97.8	125.1	132.1	90.5	116.1	72.9	88.6	73.4	64.1	60.9	High	High	High	High	High	High	High	High	High	High	1
5.42296e+18	FALSE	Low	IsMasterProtein	TGGT1_247050-t26_1-p1	transcript=TGGT1_247050-t26_1 | gene=TGGT1_247050 | organism=Toxoplasma_gondii_GT1 | gene_product=hypothetical protein | transcript_product=hypothetical protein | location=TGGT1_chrXII:3061422-3074479(+) | protein_length=2660 | sequence_SO=chromosome | SO=protein_coding_gene | is_pseudo=false	0.056	1.244	0	1	2	1	2660	287.1	6.68	4.17	1	0.824	0.986	0.847	0.428	0.636	0.214	0.162	0.272	0.124	98.1	80.8	96.7	83.1	42	62.4	21	15.9	26.7	12.2	High	High	High	High	High	High	High	High	High	High	1
-4.87552e+18	FALSE	High	IsMasterProtein	TGGT1_310280-t26_1-p1	transcript=TGGT1_310280-t26_1 | gene=TGGT1_310280 | organism=Toxoplasma_gondii_GT1 | gene_product=Phosphoethanolamine-cytidyltransferase [Source:UniProtKB/TrEMBL;Acc:S7UT77] | transcript_product=Phosphoethanolamine-cytidyltransferase | location=TGGT1_chrXI:1182233-1186804(+) | protein_length=1128 | sequence_SO=chromosome | SO=protein_coding_gene | is_pseudo=false	0	12.101	6	4	4	4	1128	121.2	6.65	9.8	4	1.277	1.481	1.038	0.947	0.875	0.644	0.489	0.568	0.665	98.1	125.3	145.3	101.8	92.9	85.9	63.1	48	55.7	65.3	High	High	High	High	High	High	High	High	High	High	1
2.54819e+17	FALSE	High	IsMasterProtein	TGGT1_214850-t26_1-p1	transcript=TGGT1_214850-t26_1 | gene=TGGT1_214850 | organism=Toxoplasma_gondii_GT1 | gene_product=Putative 1-deoxy-D-xylulose 5-phosphate reductoisomerase [Source:UniProtKB/TrEMBL;Acc:S7URH2] | transcript_product=putative 1-deoxy-D-xylulose 5-phosphate reductoisomerase | location=TGGT1_chrX:6435529-6442196(-) | protein_length=632 | sequence_SO=chromosome | SO=protein_coding_gene | is_pseudo=false	0.003	3.556	2	1	1	1	632	68.7	8.06	2.88	1	1.263	1.45	1.022	0.991	0.875	0.656	0.411	0.399	0.583	98.2	124	142.4	100.4	97.3	86	64.5	40.4	39.2	57.2	High	High	High	High	High	High	High	High	High	High	1
-5.37658e+18	FALSE	High	IsMasterProtein	TGGT1_244570-t26_1-p1	transcript=TGGT1_244570-t26_1 | gene=TGGT1_244570 | organism=Toxoplasma_gondii_GT1 | gene_product=hypothetical protein | transcript_product=hypothetical protein | location=TGGT1_chrVI:3278643-3285333(-) | protein_length=771 | sequence_SO=chromosome | SO=protein_coding_gene | is_pseudo=false	0	23.519	5	2	5	2	771	82.6	6.43	17.64	2	1.331	1.512	0.933	1.048	0.714	0.796	0.73	0.675	0.725	98.6	131.3	149.2	92.1	103.4	70.4	78.5	72.1	66.5	71.5	High	High	High	High	High	High	High	High	High	High	1
4.96692e+18	FALSE	High	IsMasterProtein	TGGT1_268280-t26_1-p1	transcript=TGGT1_268280-t26_1 | gene=TGGT1_268280 | organism=Toxoplasma_gondii_GT1 | gene_product=Chromo domain-containing protein [Source:UniProtKB/TrEMBL;Acc:S7V4G2] | transcript_product='chromo' (CHRromatin Organization MOdifier) domain-containing protein | location=TGGT1_chrVIII:6572791-6584129(-) | protein_length=1405 | sequence_SO=chromosome | SO=protein_coding_gene | is_pseudo=false	0.001	5.034	2	2	3	2	1405	154.2	5.96	6.64	2	1.244	1.233	0.929	1.075	1.069	0.786	0.567	0.604	0.561	98.8	122.8	121.8	91.8	106.2	105.6	77.7	56	59.7	55.4	High	High	High	High	High	High	High	High	High	High	1
6.111e+18	FALSE	High	IsMasterProtein	TGGT1_294180-t26_1-p1	transcript=TGGT1_294180-t26_1 | gene=TGGT1_294180 | organism=Toxoplasma_gondii_GT1 | gene_product=tRNA (guanine-N(7)-)-methyltransferase [Source:UniProtKB/TrEMBL;Acc:S7VX11] | transcript_product=tRNA -methyltransferase family protein | location=TGGT1_chrIa:663204-670077(-) | protein_length=325 | sequence_SO=chromosome | SO=protein_coding_gene | is_pseudo=false	0	12.871	10	2	2	2	325	36.3	8.56	9.98	2	1.261	1.611	0.983	1.258	0.985	0.689	0.619	0.543	0.501	99.1	124.9	159.5	97.4	124.6	97.6	68.3	61.3	53.8	49.6	High	High	High	High	High	High	High	High	High	High	1
-1.73595e+18	FALSE	High	IsMasterProtein	TGGT1_255930-t26_1-p1	transcript=TGGT1_255930-t26_1 | gene=TGGT1_255930 | organism=Toxoplasma_gondii_GT1 | gene_product=hypothetical protein | transcript_product=hypothetical protein | location=TGGT1_chrVIIb:4532716-4534241(+) | protein_length=439 | sequence_SO=chromosome | SO=protein_coding_gene | is_pseudo=false	0.001	6.639	4	2	3	2	439	47.8	4.89	8	2	1.069	1.34	0.965	1.003	0.925	0.799	0.667	0.796	0.83	99.4	106.3	133.1	95.9	99.7	91.9	79.4	66.3	79.1	82.4	High	High	High	High	High	High	High	High	High	High	1
-8.66396e+17	FALSE	High	IsMasterProtein	TGGT1_271390-t26_1-p1	transcript=TGGT1_271390-t26_1 | gene=TGGT1_271390 | organism=Toxoplasma_gondii_GT1 | gene_product=hypothetical protein | transcript_product=hypothetical protein | location=TGGT1_chrVIII:4512952-4514010(+) | protein_length=352 | sequence_SO=chromosome | SO=protein_coding_gene | is_pseudo=false	0.001	5.718	4	1	3	1	352	39.7	9.25	13.3	1	1.31	1.46	0.92	1.268	1.019	0.846	0.757	0.861	0.878	99.4	130.2	145.1	91.5	126	101.3	84	75.3	85.6	87.3	High	High	High	High	High	High	High	High	High	High	1
-3.23996e+18	FALSE	High	IsMasterProtein	TGGT1_264650-t26_1-p1	transcript=TGGT1_264650-t26_1 | gene=TGGT1_264650 | organism=Toxoplasma_gondii_GT1 | gene_product=Phosphoacetylglucosamine mutase [Source:UniProtKB/TrEMBL;Acc:S7UH29] | transcript_product=phosphoacetylglucosamine mutase | location=TGGT1_chrIX:1965907-1973225(+) | protein_length=985 | sequence_SO=chromosome | SO=protein_coding_gene | is_pseudo=false	0	10.795	2	2	2	2	985	107.7	5.64	7	2	1.164	1.218	0.998	1.05	0.893	0.665	0.576	0.666	0.625	99.8	116.1	121.5	99.6	104.8	89.1	66.4	57.5	66.5	62.4	High	High	High	High	High	High	High	High	High	High	1
2.04976e+18	FALSE	High	IsMasterProtein	TGGT1_242030-t26_1-p1	transcript=TGGT1_242030-t26_1 | gene=TGGT1_242030 | organism=Toxoplasma_gondii_GT1 | gene_product=hypothetical protein | transcript_product=hypothetical protein | location=TGGT1_chrVI:1774596-1784554(-) | protein_length=1220 | sequence_SO=chromosome | SO=protein_coding_gene | is_pseudo=false	0	15.92	3	2	3	2	1220	132.6	5.47	13.68	2	1.353	1.575	1.055	1.021	0.838	0.463	0.466	0.449	0.401	99.8	135	157.1	105.3	101.9	83.6	46.2	46.5	44.8	40	High	High	High	High	High	High	High	High	High	High	1
6.85572e+18	FALSE	High	IsMasterProtein	TGGT1_235610-t26_1-p1	transcript=TGGT1_235610-t26_1 | gene=TGGT1_235610 | organism=Toxoplasma_gondii_GT1 | gene_product=ATPase, AAA family protein [Source:UniProtKB/TrEMBL;Acc:S7VZQ6] | transcript_product=ATPase, AAA family protein | location=TGGT1_chrX:4867272-4876338(-) | protein_length=1254 | sequence_SO=chromosome | SO=protein_coding_gene | is_pseudo=false	0	18.768	2	2	12	1	1254	134.6	6.74	44.67	2	1.385	1.811	1.277	1.377	1.189	0.762	0.687	0.712	0.585	100	138.4	181.1	127.7	137.7	118.9	76.1	68.6	71.2	58.5	High	High	High	High	High	High	High	High	High	High	1
-7.6853e+18	FALSE	High	IsMasterProtein	TGGT1_265270-t26_1-p1	transcript=TGGT1_265270-t26_1 | gene=TGGT1_265270 | organism=Toxoplasma_gondii_GT1 | gene_product=hypothetical protein | transcript_product=hypothetical protein | location=TGGT1_chrIX:1457924-1460201(-) | protein_length=354 | sequence_SO=chromosome | SO=protein_coding_gene | is_pseudo=false	0.001	4.848	5	2	5	2	354	38.4	7.47	9.88	2	1.093	1.296	1.167	1.057	1.13	0.739	0.749	0.897	0.863	100.2	109.5	129.9	116.9	105.9	113.2	74	75.1	89.8	86.5	High	High	High	High	High	High	High	High	High	High	1
-6.92058e+18	FALSE	High	IsMasterProtein	TGGT1_313770-t26_1-p1	transcript=TGGT1_313770-t26_1 | gene=TGGT1_313770 | organism=Toxoplasma_gondii_GT1 | gene_product=hypothetical protein | transcript_product=hypothetical protein | location=TGGT1_chrXI:3641261-3649922(-) | protein_length=1480 | sequence_SO=chromosome | SO=protein_coding_gene | is_pseudo=false	0.001	5.342	2	2	2	2	1480	160	6.98	3.73	2	1.288	1.441	1.057	0.966	0.92	0.574	0.432	0.571	0.5	100.2	129	144.5	106	96.8	92.2	57.6	43.3	57.2	50.1	High	High	High	High	High	High	High	High	High	High	1
6.95767e+17	FALSE	High	IsMasterProtein	TGGT1_236080-t26_1-p1	transcript=TGGT1_236080-t26_1 | gene=TGGT1_236080 | organism=Toxoplasma_gondii_GT1 | gene_product=Replication factor-a protein 1 (Rpa1) subfamily protein [Source:UniProtKB/TrEMBL;Acc:S7VZM2] | transcript_product=replication factor-a protein 1 (rpa1) subfamily protein | location=TGGT1_chrX:5156311-5165323(-) | protein_length=904 | sequence_SO=chromosome | SO=protein_coding_gene | is_pseudo=false	0	13.813	3	2	2	2	904	98.8	7.31	8.24	2	1.002	1.235	1.065	0.54	0.839	0.513	0.439	0.602	0.472	100.3	100.5	123.9	106.8	54.2	84.2	51.4	44	60.4	47.4	High	High	High	High	High	High	High	High	High	High	1
7.25112e+18	FALSE	High	IsMasterProtein	TGGT1_294050-t26_1-p1	transcript=TGGT1_294050-t26_1 | gene=TGGT1_294050 | organism=Toxoplasma_gondii_GT1 | gene_product=hypothetical protein | transcript_product=hypothetical protein | location=TGGT1_chrIa:649262-650986(-) | protein_length=574 | sequence_SO=chromosome | SO=protein_coding_gene | is_pseudo=false	0	13.984	8	3	5	3	574	61.9	5.82	12.49	3	1.14	1.547	1.021	1.141	1.037	0.782	0.66	0.601	0.474	100.6	114.7	155.7	102.7	114.8	104.4	78.7	66.5	60.4	47.7	High	High	High	High	High	High	High	High	High	High	1
6.75313e+18	FALSE	High	IsMasterProtein	TGGT1_216120-t26_1-p1	transcript=TGGT1_216120-t26_1 | gene=TGGT1_216120 | organism=Toxoplasma_gondii_GT1 | gene_product=hypothetical protein | transcript_product=hypothetical protein | location=TGGT1_chrXI:6313282-6318525(-) | protein_length=834 | sequence_SO=chromosome | SO=protein_coding_gene | is_pseudo=false	0	8.368	5	3	3	3	834	90.3	7.12	6.24	3	0.982	1.102	0.882	0.794	0.807	0.42	0.356	0.428	0.463	100.8	99	111.1	88.9	80	81.4	42.4	35.9	43.1	46.7	High	High	High	High	High	High	High	High	High	High	1
-1.62544e+18	FALSE	High	IsMasterProtein	TGGT1_292235-t26_1-p1	transcript=TGGT1_292235-t26_1 | gene=TGGT1_292235 | organism=Toxoplasma_gondii_GT1 | gene_product=RING-type domain-containing protein [Source:UniProtKB/TrEMBL;Acc:S7UQ35] | transcript_product=hypothetical protein | location=TGGT1_chrIX:4439011-4446274(-) | protein_length=1451 | sequence_SO=chromosome | SO=protein_coding_gene | is_pseudo=false	0.001	4.713	1	2	2	2	1451	154.4	8.44	4.36	2	1.183	0.997	0.878	0.708	0.511	0.404	0.305	0.329	0.299	101.1	119.6	100.7	88.7	71.5	51.6	40.8	30.9	33.3	30.3	High	High	High	High	High	High	High	High	High	High	1
8.83266e+18	FALSE	High	IsMasterProtein	TGGT1_226220-t26_1-p1	transcript=TGGT1_226220-t26_1 | gene=TGGT1_226220 | organism=Toxoplasma_gondii_GT1 | gene_product=Alveolin domain containing intermediate filament IMC9 [Source:UniProtKB/TrEMBL;Acc:S7UX40] | transcript_product=alveolin domain containing intermediate filament IMC9 | location=TGGT1_chrX:1688557-1695197(+) | protein_length=756 | sequence_SO=chromosome | SO=protein_coding_gene | is_pseudo=false	0.002	4.037	1	1	1	1	756	83.2	7.5	2.88	1	1.163	1.275	1.342	1.006	1.084	1.17	1.15	1.439	1.309	101.2	117.6	129	135.8	101.8	109.7	118.3	116.4	145.5	132.4	High	High	High	High	High	High	High	High	High	High	1
4.63303e+18	FALSE	Medium	IsMasterProtein	TGGT1_300030-t26_1-p1	transcript=TGGT1_300030-t26_1 | gene=TGGT1_300030 | organism=Toxoplasma_gondii_GT1 | gene_product=hypothetical protein | transcript_product=hypothetical protein | location=TGGT1_chrXII:223017-230080(-) | protein_length=903 | sequence_SO=chromosome | SO=protein_coding_gene | is_pseudo=false	0.019	1.869	1	1	1	1	903	98.2	6.8	1.88	1	1.166	1.235	0.792	0.818	0.685	0.391	0.393	0.348	0.423	101.2	117.9	125	80.2	82.7	69.4	39.6	39.8	35.2	42.8	High	High	High	High	High	High	High	High	High	High	1
2.62476e+18	FALSE	Medium	IsMasterProtein	TGGT1_291040-t26_1-p1	transcript=TGGT1_291040-t26_1 | gene=TGGT1_291040 | organism=Toxoplasma_gondii_GT1 | gene_product=Lactate dehydrogenase LDH2 [Source:UniProtKB/TrEMBL;Acc:A0A125YPI4] | transcript_product=lactate dehydrogenase LDH2 | location=TGGT1_chrIX:3890037-3891605(+) | protein_length=326 | sequence_SO=chromosome | SO=protein_coding_gene | is_pseudo=false	0.041	1.41	2	1	1	1	326	35.3	6.98	1.81	1	1.209	1.143	0.913	0.844	0.815	0.731	0.562	0.677	0.386	101.3	122.4	115.8	92.5	85.5	82.5	74	56.9	68.6	39.1	High	High	High	High	High	High	High	High	High	High	1
3.52209e+18	FALSE	High	IsMasterProtein	TGGT1_203750-t26_1-p1	transcript=TGGT1_203750-t26_1 | gene=TGGT1_203750 | organism=Toxoplasma_gondii_GT1 | gene_product=hypothetical protein | transcript_product=hypothetical protein | location=TGGT1_chrVIIa:2165529-2180173(+) | protein_length=1382 | sequence_SO=chromosome | SO=protein_coding_gene | is_pseudo=false	0	10.374	2	2	7	2	1382	149.7	6.43	24.79	2	1.316	1.279	1.018	1.17	0.884	0.604	0.523	0.536	0.478	102.1	134.3	130.5	103.9	119.5	90.3	61.6	53.4	54.7	48.8	High	High	High	High	High	High	High	High	High	High	1
4.73722e+18	FALSE	High	IsMasterProtein	TGGT1_216600-t26_1-p1	transcript=TGGT1_216600-t26_1 | gene=TGGT1_216600 | organism=Toxoplasma_gondii_GT1 | gene_product=DNA-(apurinic or apyrimidinic site) lyase [Source:UniProtKB/TrEMBL;Acc:S7UKX1] | transcript_product=exonuclease III APE | location=TGGT1_chrXI:5970848-5978564(-) | protein_length=616 | sequence_SO=chromosome | SO=protein_coding_gene | is_pseudo=false	0.001	5.954	4	2	2	2	616	67.7	8.06	6	2	1.356	1.509	1.026	1.036	0.834	0.526	0.478	0.481	0.457	102.3	138.7	154.4	104.9	106.1	85.4	53.8	48.9	49.2	46.8	High	High	High	High	High	High	High	High	High	High	1
-4.57006e+16	FALSE	High	IsMasterProtein	TGGT1_297400-t26_1-p1	transcript=TGGT1_297400-t26_1 | gene=TGGT1_297400 | organism=Toxoplasma_gondii_GT1 | gene_product=hypothetical protein | transcript_product=hypothetical protein | location=TGGT1_chrII:1724989-1728872(+) | protein_length=417 | sequence_SO=chromosome | SO=protein_coding_gene | is_pseudo=false	0	15.486	13	2	5	2	417	46.5	6.06	23.45	2	1.242	1.313	0.795	1.22	1.033	0.848	0.789	0.859	1.004	102.5	127.3	134.5	81.4	124.9	105.8	86.9	80.8	88.1	102.8	High	High	High	High	High	High	High	High	High	High	1
-2.03081e+18	FALSE	High	IsMasterProtein	TGGT1_230705-t26_1-p1	transcript=TGGT1_230705-t26_1 | gene=TGGT1_230705 | organism=Toxoplasma_gondii_GT1 | gene_product=hypothetical protein | transcript_product=hypothetical protein | location=TGGT1_chrVIII:985569-986920(-) | protein_length=266 | sequence_SO=chromosome | SO=protein_coding_gene | is_pseudo=false	0	14.274	13	2	3	2	266	28.5	5.96	11.07	2	1.291	1.473	1.147	1.263	1.082	0.936	0.884	0.961	0.82	102.6	132.5	151.2	117.8	129.6	111	96.1	90.7	98.6	84.1	High	High	High	High	High	High	High	High	High	High	1
8.3058e+18	FALSE	High	IsMasterProtein	TGGT1_249870-t26_1-p1	transcript=TGGT1_249870-t26_1 | gene=TGGT1_249870 | organism=Toxoplasma_gondii_GT1 | gene_product=C2 domain-containing protein [Source:UniProtKB/TrEMBL;Acc:A0A125YU55] | transcript_product=hypothetical protein | location=TGGT1_chrXII:4850395-4853682(-) | protein_length=381 | sequence_SO=chromosome | SO=protein_coding_gene | is_pseudo=false	0	15.217	6	2	3	2	381	40.8	9.01	9.95	2	1.341	1.615	0.96	1.331	0.797	0.715	0.575	0.558	0.466	102.6	137.7	165.7	98.5	136.6	81.8	73.4	59	57.3	47.9	High	High	High	High	High	High	High	High	High	High	1
6.00803e+18	FALSE	High	IsMasterProtein	TGGT1_235130-t26_1-p1	transcript=TGGT1_235130-t26_1 | gene=TGGT1_235130 | organism=Toxoplasma_gondii_GT1 | gene_product=Transmembrane protein [Source:UniProtKB/TrEMBL;Acc:A0A125YYR0] | transcript_product=transmembrane protein | location=TGGT1_chrX:4523427-4527219(+) | protein_length=487 | sequence_SO=chromosome | SO=protein_coding_gene | is_pseudo=false	0	11.949	7	3	5	3	487	55.1	8.29	13.35	3	1.008	1.212	0.877	0.872	0.727	0.496	0.498	0.512	0.446	102.8	103.6	124.6	90.2	89.6	74.7	51	51.1	52.6	45.8	High	High	High	High	High	High	High	High	High	High	1
2.7185e+18	FALSE	High	IsMasterProtein	TGGT1_209860-t26_1-p1	transcript=TGGT1_209860-t26_1 | gene=TGGT1_209860 | organism=Toxoplasma_gondii_GT1 | gene_product=SRP40_C domain-containing protein [Source:UniProtKB/TrEMBL;Acc:S7VXU1] | transcript_product=SRP40, C-terminal domain-containing protein | location=TGGT1_chrIb:1509068-1514507(+) | protein_length=424 | sequence_SO=chromosome | SO=protein_coding_gene | is_pseudo=false	0	30.86	17	5	5	5	424	47.5	9.91	19.35	5	1.246	1.491	1.113	1.326	1.077	0.974	0.834	0.968	1.04	102.8	128	153.2	114.4	136.3	110.7	100.1	85.7	99.5	106.9	High	High	High	High	High	High	High	High	High	High	1
-7.46668e+18	FALSE	High	IsMasterProtein	TGGT1_291940-t26_1-p1	transcript=TGGT1_291940-t26_1 | gene=TGGT1_291940 | organism=Toxoplasma_gondii_GT1 | gene_product=hypothetical protein | transcript_product=hypothetical protein | location=TGGT1_chrIX:4219873-4224091(+) | protein_length=907 | sequence_SO=chromosome | SO=protein_coding_gene | is_pseudo=false	0.001	5.928	2	2	3	2	907	95.7	7.72	7.11	2	1.169	1.465	0.924	1.052	0.877	0.567	0.415	0.364	0.391	102.8	120.2	150.7	95	108.2	90.1	58.3	42.7	37.4	40.2	High	High	High	High	High	High	High	High	High	High	1
-4.61828e+18	FALSE	High	IsMasterProtein	TGGT1_310802-t26_1-p1	transcript=TGGT1_310802-t26_1 | gene=TGGT1_310802 | organism=Toxoplasma_gondii_GT1 | gene_product=CRAL-TRIO domain-containing protein [Source:UniProtKB/TrEMBL;Acc:S7W265] | transcript_product=CRAL/TRIO domain-containing protein | location=TGGT1_chrXI:1562990-1566501(+) | protein_length=499 | sequence_SO=chromosome | SO=protein_coding_gene | is_pseudo=false	0	12.728	7	2	2	2	499	55.7	8.79	7.43	2	1.141	1.354	0.99	0.879	0.893	0.55	0.447	0.455	0.356	103.6	118.3	140.4	102.6	91.1	92.5	57	46.3	47.2	36.9	High	High	High	High	High	High	High	High	High	High	1
1.81513e+18	FALSE	High	IsMasterProtein	TGGT1_315120-t26_1-p1	transcript=TGGT1_315120-t26_1 | gene=TGGT1_315120 | organism=Toxoplasma_gondii_GT1 | gene_product=hypothetical protein | transcript_product=hypothetical protein | location=TGGT1_chrXI:4429993-4431988(+) | protein_length=272 | sequence_SO=chromosome | SO=protein_coding_gene | is_pseudo=false	0.001	5.669	4	1	2	1	272	28.9	5.22	5.69	1	1.319	1.424	1.157	1.189	0.931	0.785	0.666	0.678	0.586	103.7	136.8	147.6	120	123.3	96.6	81.4	69.1	70.3	60.7	High	High	High	High	High	High	High	High	High	High	1
4.35011e+18	FALSE	High	IsMasterProtein	TGGT1_315920-t26_1-p1	transcript=TGGT1_315920-t26_1 | gene=TGGT1_315920 | organism=Toxoplasma_gondii_GT1 | gene_product=RNA_pol_L_2 domain-containing protein [Source:UniProtKB/TrEMBL;Acc:S7W157] | transcript_product=DNA-directed RNA polymerase II RPB11A | location=TGGT1_chrXI:5020461-5022963(-) | protein_length=178 | sequence_SO=chromosome | SO=protein_coding_gene | is_pseudo=false	0	17.168	22	2	2	2	178	19.8	8.84	7.19	2	1.35	1.7	1.188	1.199	0.925	0.63	0.49	0.505	0.4	104	140.5	176.8	123.6	124.7	96.2	65.5	50.9	52.6	41.6	High	High	High	High	High	High	High	High	High	High	1
8.43045e+18	FALSE	Medium	IsMasterProtein	TGGT1_224540-t26_1-p1	transcript=TGGT1_224540-t26_1 | gene=TGGT1_224540 | organism=Toxoplasma_gondii_GT1 | gene_product=hypothetical protein | transcript_product=hypothetical protein | location=TGGT1_chrX:2899044-2902293(-) | protein_length=969 | sequence_SO=chromosome | SO=protein_coding_gene | is_pseudo=false	0.017	1.983	2	1	1	1	969	99.4	4.96	2.17	1	1.114	1.356	0.873	0.934	1.013	0.683	0.596	0.762	0.7	104.6	116.6	141.9	91.4	97.8	106	71.5	62.4	79.8	73.3	High	High	High	High	High	High	High	High	High	High	1
-1.71705e+18	FALSE	High	IsMasterProtein	TGGT1_234510-t26_1-p1	transcript=TGGT1_234510-t26_1 | gene=TGGT1_234510 | organism=Toxoplasma_gondii_GT1 | gene_product=Ankyrin repeat-containing protein [Source:UniProtKB/TrEMBL;Acc:S7WBI1] | transcript_product=ankyrin repeat-containing protein | location=TGGT1_chrX:4327248-4329080(-) | protein_length=311 | sequence_SO=chromosome | SO=protein_coding_gene | is_pseudo=false	0	14.396	9	2	4	2	311	33.9	5.33	13.75	2	1.03	1.275	0.757	0.806	0.656	0.414	0.364	0.362	0.28	104.9	108	133.7	79.4	84.6	68.8	43.4	38.2	37.9	29.4	High	High	High	High	High	High	High	High	High	High	1
-8.02882e+18	FALSE	High	IsMasterProtein	TGGT1_246730-t26_1-p1	transcript=TGGT1_246730-t26_1 | gene=TGGT1_246730 | organism=Toxoplasma_gondii_GT1 | gene_product=hypothetical protein | transcript_product=hypothetical protein | location=TGGT1_chrXII:2879058-2882486(+) | protein_length=349 | sequence_SO=chromosome | SO=protein_coding_gene | is_pseudo=false	0.005	2.948	2	1	2	1	349	40	9.88	4.34	1	1.205	1.37	1.055	0.984	0.911	0.56	1.028	0.625	1.024	105.6	127.2	144.7	111.4	103.9	96.2	59.1	108.6	66	108.2	High	High	High	High	High	High	High	High	High	High	1
-7.3122e+17	FALSE	High	IsMasterProtein	TGGT1_224200-t26_1-p1	transcript=TGGT1_224200-t26_1 | gene=TGGT1_224200 | organism=Toxoplasma_gondii_GT1 | gene_product=PseudoU_synth_1 domain-containing protein [Source:UniProtKB/TrEMBL;Acc:S7UW42] | transcript_product=tRNA pseudouridine synthase | location=TGGT1_chrX:3153285-3160162(-) | protein_length=901 | sequence_SO=chromosome | SO=protein_coding_gene | is_pseudo=false	0	18.241	5	3	4	3	901	97.2	6.21	18.13	3	1.078	1.194	1.051	0.909	0.774	0.529	0.456	0.474	0.46	105.8	114.1	126.3	111.2	96.2	81.9	56	48.3	50.1	48.7	High	High	High	High	High	High	High	High	High	High	1
8.50347e+18	FALSE	High	IsMasterProtein	TGGT1_310190-t26_1-p1	transcript=TGGT1_310190-t26_1 | gene=TGGT1_310190 | organism=Toxoplasma_gondii_GT1 | gene_product=Protein kinase domain-containing protein [Source:UniProtKB/TrEMBL;Acc:S7W7W9] | transcript_product=PIK3R4 kinase-related protein (incomplete catalytic triad) | location=TGGT1_chrXI:1090626-1102523(-) | protein_length=3028 | sequence_SO=chromosome | SO=protein_coding_gene | is_pseudo=false	0	10.247	1	2	2	2	3028	316.9	7.88	8.07	2	1.261	1.529	1.027	0.921	0.902	0.445	0.311	0.45	0.44	105.9	133.6	162	108.8	97.5	95.6	47.1	32.9	47.6	46.6	High	High	High	High	High	High	High	High	High	High	1
6.51356e+18	FALSE	Medium	IsMasterProtein	TGGT1_219790B-t26_1-p1	transcript=TGGT1_219790B-t26_1 | gene=TGGT1_219790B | organism=Toxoplasma_gondii_GT1 | gene_product=Pre-mRNA processing factor PRP3 [Source:UniProtKB/TrEMBL;Acc:S7WAM1] | transcript_product=pre-mRNA processing factor PRP3 | location=TGGT1_chrXII:579057-586810(-) | protein_length=643 | sequence_SO=chromosome | SO=protein_coding_gene | is_pseudo=false	0.019	1.863	1	1	1	1	643	72.2	8.81	2.3	1	1.231	1.394	1.076	0.987	0.762	0.493	0.443	0.381	0.517	105.9	130.4	147.6	113.9	104.6	80.7	52.2	46.9	40.4	54.8	High	High	High	High	High	High	High	High	High	High	1
-6.30749e+18	FALSE	High	IsMasterProtein	TGGT1_200460-t26_1-p1	transcript=TGGT1_200460-t26_1 | gene=TGGT1_200460 | organism=Toxoplasma_gondii_GT1 | gene_product=hypothetical protein | transcript_product=hypothetical protein | location=TGGT1_chrVIII:6876799-6882770(-) | protein_length=436 | sequence_SO=chromosome | SO=protein_coding_gene | is_pseudo=false	0	10.021	6	2	2	2	436	48.5	6.95	5.83	2	1.325	1.491	1.096	1.203	1.039	0.731	0.544	0.526	0.459	106.7	141.3	159	116.9	128.3	110.8	78	58	56.2	48.9	High	High	High	High	High	High	High	High	High	High	1
-2.4161e+18	FALSE	High	IsMasterProtein	TGGT1_251885-t26_1-p1	transcript=TGGT1_251885-t26_1 | gene=TGGT1_251885 | organism=Toxoplasma_gondii_GT1 | gene_product=hypothetical protein | transcript_product=hypothetical protein | location=TGGT1_chrXII:5562782-5564509(+) | protein_length=215 | sequence_SO=chromosome | SO=protein_coding_gene | is_pseudo=false	0	14.28	20	3	4	3	215	24.1	9.44	16.35	3	1.273	1.414	1.052	1.132	0.926	0.861	0.865	0.887	0.833	107.1	136.3	151.4	112.7	121.2	99.2	92.2	92.7	95	89.2	High	High	High	High	High	High	High	High	High	High	1
9.10147e+18	FALSE	High	IsMasterProtein	TGGT1_270960-t26_1-p1	transcript=TGGT1_270960-t26_1 | gene=TGGT1_270960 | organism=Toxoplasma_gondii_GT1 | gene_product=hypothetical protein | transcript_product=hypothetical protein | location=TGGT1_chrVIII:4830509-4837142(+) | protein_length=1243 | sequence_SO=chromosome | SO=protein_coding_gene | is_pseudo=false	0	8.104	3	3	3	2	1243	138.6	5.2	5.16	3	0.82	0.928	0.868	0.692	0.809	0.384	0.344	0.342	0.364	107.4	88	99.6	93.2	74.3	86.9	41.2	37	36.8	39.1	High	High	High	High	High	High	High	High	High	High	1
-8.32012e+18	FALSE	High	IsMasterProtein	TGGT1_314020-t26_1-p1	transcript=TGGT1_314020-t26_1 | gene=TGGT1_314020 | organism=Toxoplasma_gondii_GT1 | gene_product=hypothetical protein | transcript_product=hypothetical protein | location=TGGT1_chrXI:3840878-3848889(-) | protein_length=1386 | sequence_SO=chromosome | SO=protein_coding_gene | is_pseudo=false	0.002	4.057	2	1	1	1	1386	151.7	6.95	5.13	1	1.338	1.513	1.157	1.145	0.884	0.853	0.733	0.531	0.5	107.8	144.2	163.1	124.7	123.5	95.3	92	79.1	57.2	53.9	High	High	High	High	High	High	High	High	High	High	1
2.32259e+18	FALSE	High	IsMasterProtein	TGGT1_250040-t26_1-p1	transcript=TGGT1_250040-t26_1 | gene=TGGT1_250040 | organism=Toxoplasma_gondii_GT1 | gene_product=hypothetical protein | transcript_product=hypothetical protein | location=TGGT1_chrXII:4931674-4933414(+) | protein_length=263 | sequence_SO=chromosome | SO=protein_coding_gene | is_pseudo=false	0	10.919	13	3	4	3	263	29.5	9.48	13.1	3	1.176	1.214	0.997	0.988	0.797	0.636	0.407	0.414	0.422	107.9	126.9	131	107.6	106.6	86	68.6	43.9	44.7	45.6	High	High	High	High	High	High	High	High	High	High	1
4.48428e+18	FALSE	High	IsMasterProtein	TGGT1_244260-t26_1-p1	transcript=TGGT1_244260-t26_1 | gene=TGGT1_244260 | organism=Toxoplasma_gondii_GT1 | gene_product=hypothetical protein | transcript_product=hypothetical protein | location=TGGT1_chrVI:3058707-3059210(+) | protein_length=167 | sequence_SO=chromosome | SO=protein_coding_gene | is_pseudo=false	0	6.96	8	1	1	1	167	18.9	7.4	4.16	1	1.063	1.348	1.01	0.881	1.104	0.717	0.644	0.741	0.739	108.2	115	145.9	109.4	95.4	119.5	77.6	69.7	80.2	80	High	High	High	High	High	High	High	High	High	High	1
5.5894e+18	FALSE	High	IsMasterProtein	TGGT1_295620-t26_1-p1	transcript=TGGT1_295620-t26_1 | gene=TGGT1_295620 | organism=Toxoplasma_gondii_GT1 | gene_product=C3H1-type domain-containing protein [Source:UniProtKB/TrEMBL;Acc:A0A125YIL5] | transcript_product=hypothetical protein | location=TGGT1_chrIa:1655687-1659951(+) | protein_length=1237 | sequence_SO=chromosome | SO=protein_coding_gene | is_pseudo=false	0.003	3.876	2	2	2	2	1237	128.4	6.86	2.31	2	1.103	1.379	1.102	0.963	0.889	0.678	0.733	0.706	0.623	108.7	119.8	149.8	119.8	104.7	96.6	73.6	79.6	76.7	67.7	High	High	High	High	High	High	High	High	High	High	1
6.57245e+18	FALSE	High	IsMasterProtein	TGGT1_267650-t26_1-p1	transcript=TGGT1_267650-t26_1 | gene=TGGT1_267650 | organism=Toxoplasma_gondii_GT1 | gene_product=hypothetical protein | transcript_product=hypothetical protein | location=TGGT1_chrIX:327815-341252(-) | protein_length=3030 | sequence_SO=chromosome | SO=protein_coding_gene | is_pseudo=false	0.005	3.188	0	1	1	1	3030	323.6	8.18	2.9	1	1.116	1.299	0.891	0.858	0.694	0.391	0.342	0.371	0.297	108.9	121.6	141.5	97.1	93.5	75.7	42.6	37.3	40.5	32.3	High	High	High	High	High	High	High	High	High	High	1
-2.94464e+18	FALSE	High	IsMasterProtein	TGGT1_224210-t26_1-p1	transcript=TGGT1_224210-t26_1 | gene=TGGT1_224210 | organism=Toxoplasma_gondii_GT1 | gene_product=C2 NT-type domain-containing protein [Source:UniProtKB/TrEMBL;Acc:S7WBT8] | transcript_product=hypothetical protein | location=TGGT1_chrX:3128859-3139913(-) | protein_length=1175 | sequence_SO=chromosome | SO=protein_coding_gene | is_pseudo=false	0	13.235	3	2	3	2	1175	129.4	7.71	10.93	2	1.11	1.314	0.911	0.997	0.764	0.603	0.515	0.492	0.481	109.1	121	143.3	99.3	108.7	83.3	65.8	56.2	53.6	52.4	High	High	High	High	High	High	High	High	High	High	1
5.34629e+18	FALSE	High	IsMasterProtein	TGGT1_224920-t26_1-p1	transcript=TGGT1_224920-t26_1 | gene=TGGT1_224920 | organism=Toxoplasma_gondii_GT1 | gene_product=hypothetical protein | transcript_product=hypothetical protein | location=TGGT1_chrX:2591104-2600842(-) | protein_length=1759 | sequence_SO=chromosome | SO=protein_coding_gene | is_pseudo=false	0.009	2.419	0	1	2	1	1759	190.5	7.88	4.55	1	1.298	1.224	0.961	0.854	0.591	0.493	0.505	0.519	0.428	109.2	141.7	133.6	105	93.2	64.6	53.8	55.2	56.7	46.7	High	High	High	High	High	High	High	High	High	High	1
[truncated: 2,590 more rows]

## Sheet: 4.2_input_noCa_R2
Proteins Unique Sequence ID	Protein FDR Confidence: Combined	Master	Accession	Description	Exp. q-value: Combined	Sum PEP Score	Coverage [%]	# Peptides	# PSMs	# Unique Peptides	MW [kDa]	Score Sequest HT: Sequest HT	# Peptides (by Search Engine): Sequest HT	Abundance Ratio: (41) / (37)	Abundance Ratio: (43) / (37)	Abundance Ratio: (47) / (37)	Abundance Ratio: (50) / (37)	Abundance Ratio: (53) / (37)	Abundance Ratio: (56) / (37)	Abundance Ratio: (59) / (37)	Abundance Ratio: (63) / (37)	Abundance Ratio: (67) / (37)	Abundances (Grouped): 37	Abundances (Grouped): 41	Abundances (Grouped): 43	Abundances (Grouped): 47	Abundances (Grouped): 50	Abundances (Grouped): 53	Abundances (Grouped): 56	Abundances (Grouped): 59	Abundances (Grouped): 63	Abundances (Grouped): 67	Abundance: F1: 126, Sample, 37	Abundance: F1: 127N, Sample, 41	Abundance: F1: 127C, Sample, 43	Abundance: F1: 128N, Sample, 47	Abundance: F1: 128C, Sample, 50	Abundance: F1: 129N, Sample, 53	Abundance: F1: 129C, Sample, 56	Abundance: F1: 130N, Sample, 59	Abundance: F1: 130C, Sample, 63	Abundance: F1: 131, Sample, 67	Found in Sample: [S1] F1: 126, Sample, 37	Found in Sample: [S3] F1: 127N, Sample, 41	Found in Sample: [S4] F1: 127C, Sample, 43	Found in Sample: [S5] F1: 128N, Sample, 47	Found in Sample: [S6] F1: 128C, Sample, 50	Found in Sample: [S7] F1: 129N, Sample, 53	Found in Sample: [S8] F1: 129C, Sample, 56
[truncated: 2,980 more rows]
[truncated: 5 more columns]

[truncated: 4 more sheets: 4.3_input_plusCa_R1, 4.4_input_plusCa_R2, 4.5_mineCETSA_curve_fits, 4.6_mineCETSA ED score]
