# Supplementary material for: Temporal and thermal profiling of the Toxoplasma proteome implicates parasite Protein Phosphatase 1 in the regulation of Ca2+-responsive pathways
Source: eLife. 2022 Aug 17;11:e80336. doi: 10.7554/eLife.80336 (PMC9436416; doi:10.7554/eLife.80336)
Supplement: Supplementary file 4. — 1. Protein and abundance assignments from Proteome Discoverer 2.4 for Experiment 1 samples with 54 °C, replicate 1. 2. Protein and abundance assignments from Proteome Discoverer 2.4 for Experiment 1 samples with 54 °C, replicate 2. 3. Protein and abundance assignments from Proteome Discoverer 2.4 for Experiment 1 samples with 58 °C, replicate 1. 4. Protein and abundance assignments from Proteome Discoverer 2.4 for Experiment 1 samples with 58 °C, replicate 2. 5. Curve fit output for concentration range Experiment 1 from the mineCETSA package. 6. Area under the curve score calculations from the mineCETSA package for concentration range Experiment 2. 7. Protein and abundance assignments from Proteome Discoverer 2.4 for Experiment 2 samples with 50 °C, replicate 1. 8. Protein and abundance assignments from Proteome Discoverer 2.4 for Experiment 2 samples with 50 °C, replicate 2. 8. Protein and abundance assignments from Proteome Discoverer 2.4 for Experiment 2 samples with 54 °C, replicate 1. 9. Protein and abundance assignments from Proteome Discoverer 2.4 for Experiment 2 samples with 54 °C, replicate 2. 10. Protein and abundance assignments from Proteome Discoverer 2.4 for Experiment 2 samples with 58 °C, replicate 1. 11. Protein and abundance assignments from Proteome Discoverer 2.4 for Experiment 2 samples with 58 °C, replicate 2. 12. Curve fit output for concentration range Experiment 2 from the mineCETSA package. 13. Area under the curve score calculations from the mineCETSA package for concentration range Experiment 2. [file elife-80336-supp4.xlsx]

## Sheet: 5.1_input_Exp1_R1_54C
Proteins Unique Sequence ID	Checked	Protein FDR Confidence: Combined	Master	Accession	Description	Exp. q-value: Combined	Sum PEP Score	Coverage [%]	# Peptides	# PSMs	# Unique Peptides	# AAs	MW [kDa]	calc. pI	Score Sequest HT: Sequest HT	# Peptides (by Search Engine): Sequest HT	Abundance Ratio: (10) / (0)	Abundance Ratio: (100) / (0)	Abundance Ratio: (250) / (0)	Abundance Ratio: (500) / (0)	Abundance Ratio: (750) / (0)	Abundance Ratio: (1000) / (0)	Abundance Ratio: (10000) / (0)	Abundance Ratio: (100000) / (0)	Abundance Ratio: (1000000) / (0)	Abundances (Grouped): 0	Abundances (Grouped): 10	Abundances (Grouped): 100	Abundances (Grouped): 250	Abundances (Grouped): 500	Abundances (Grouped): 750	Abundances (Grouped): 1000	Abundances (Grouped): 10000	Abundances (Grouped): 100000	Abundances (Grouped): 1000000	Abundances (Normalized): F1: 126, Control, 0	Abundances (Normalized): F1: 127N, Sample, 10	Abundances (Normalized): F1: 127C, Sample, 100	Abundances (Normalized): F1: 128N, Sample, 250	Abundances (Normalized): F1: 128C, Sample, 500	Abundances (Normalized): F1: 129N, Sample, 750	Abundances (Normalized): F1: 129C, Sample, 1000	Abundances (Normalized): F1: 130N, Sample, 10000	Abundances (Normalized): F1: 130C, Sample, 100000	Abundances (Normalized): F1: 131, Sample, 1000000	Found in Sample: [S1] F1: 126, Control, 0	Found in Sample: [S3] F1: 127N, Sample, 10	Found in Sample: [S4] F1: 127C, Sample, 100	Found in Sample: [S5] F1: 128N, Sample, 250
-4.68536e+18	FALSE	Medium	IsMasterProtein	TGGT1_257420-t26_1-p1	transcript=TGGT1_257420-t26_1 | gene=TGGT1_257420 | organism=Toxoplasma_gondii_GT1 | gene_product=hypothetical protein | transcript_product=hypothetical protein | location=TGGT1_chrVIIb:3995821-3997596(-) | protein_length=591 | sequence_SO=chromosome | SO=protein_coding_gene | is_pseudo=false	0.018	1.739	3	1	1	1	591	63.4	6.62	2.18	1																														High	High	High	High
2.89112e+18	FALSE	Medium	IsMasterProtein	TGGT1_240960-t26_1-p1	transcript=TGGT1_240960-t26_1 | gene=TGGT1_240960 | organism=Toxoplasma_gondii_GT1 | gene_product=GGACT domain-containing protein [Source:UniProtKB/TrEMBL;Acc:S7W6W7] | transcript_product=AIG2 family protein | location=TGGT1_chrVI:1554589-1556445(-) | protein_length=424 | sequence_SO=chromosome | SO=protein_coding_gene | is_pseudo=false	0.04	1.312	2	1	1	1	424	45.9	5.39	2.61	1																														High	High	High	High
-7.25259e+18	FALSE	High	IsMasterProtein	TGGT1_220450-t26_1-p1	transcript=TGGT1_220450-t26_1 | gene=TGGT1_220450 | organism=Toxoplasma_gondii_GT1 | gene_product=RNase H domain-containing protein [Source:UniProtKB/TrEMBL;Acc:S7UH82] | transcript_product=ribonuclease HI protein | location=TGGT1_chrV:288483-290660(-) | protein_length=657 | sequence_SO=chromosome | SO=protein_coding_gene | is_pseudo=false	0.007	2.365	2	1	1	1	657	71	6.32	0	1																														Not Found	Not Found	Not Found	Not Found
-2.14331e+18	FALSE	High	IsMasterProtein	TGGT1_211695-t26_1-p1	transcript=TGGT1_211695-t26_1 | gene=TGGT1_211695 | organism=Toxoplasma_gondii_GT1 | gene_product=hypothetical protein | transcript_product=hypothetical protein | location=TGGT1_chrIV:1527841-1529396(+) | protein_length=374 | sequence_SO=chromosome | SO=protein_coding_gene | is_pseudo=false	0.001	4.318	3	1	1	1	374	39.8	8.59	3.59	1																														High	High	High	High
-6.4851e+17	FALSE	Medium	IsMasterProtein	TGGT1_270330-t26_1-p1	transcript=TGGT1_270330-t26_1 | gene=TGGT1_270330 | organism=Toxoplasma_gondii_GT1 | gene_product=Protein kinase domain-containing protein [Source:UniProtKB/TrEMBL;Acc:S7V491] | transcript_product=putative cell-cycle-associated protein kinase | location=TGGT1_chrVIII:5267797-5269932(-) | protein_length=425 | sequence_SO=chromosome | SO=protein_coding_gene | is_pseudo=false	0.043	1.281	2	1	1	1	425	46.4	8.29	0	1																														High	High	High	High
-3.27564e+18	FALSE	High	IsMasterProtein	TGGT1_225710-t26_1-p1	transcript=TGGT1_225710-t26_1 | gene=TGGT1_225710 | organism=Toxoplasma_gondii_GT1 | gene_product=Mitochondrial import inner membrane translocase subunit TIM22 [Source:UniProtKB/TrEMBL;Acc:A0A125YKI6] | transcript_product=putative mitochondrial inner membrane translocase subunit TIM17 | location=TGGT1_chrX:2020388-2023064(-) | protein_length=229 | sequence_SO=chromosome | SO=protein_coding_gene |…	0.004	2.648	5	1	1	1	229	24.7	7.21	2.77	1																														High	High	High	High
-2.5173e+18	FALSE	High	IsMasterProtein	TGGT1_311660-t26_1-p1	transcript=TGGT1_311660-t26_1 | gene=TGGT1_311660 | organism=Toxoplasma_gondii_GT1 | gene_product=SET domain-containing protein [Source:UniProtKB/TrEMBL;Acc:S7W1X7] | transcript_product=putative histone lysine methyltransferase, SET | location=TGGT1_chrXI:2147717-2157389(-) | protein_length=1795 | sequence_SO=chromosome | SO=protein_coding_gene | is_pseudo=false	0.002	3.749	1	1	1	1	1795	195.4	7.39	2.69	1																														Not Found	Not Found	Not Found	Not Found
4.69128e+18	FALSE	High	IsMasterProtein	TGGT1_202480-t26_1-p1	transcript=TGGT1_202480-t26_1 | gene=TGGT1_202480 | organism=Toxoplasma_gondii_GT1 | gene_product=hypothetical protein | transcript_product=hypothetical protein | location=TGGT1_chrVIIa:3195653-3198003(+) | protein_length=430 | sequence_SO=chromosome | SO=protein_coding_gene | is_pseudo=false	0.003	2.855	2	1	1	1	430	43.6	7.01	2.46	1																														High	High	High	High
-6.55658e+18	FALSE	High	IsMasterProtein	TGGT1_237000-t26_1-p1	transcript=TGGT1_237000-t26_1 | gene=TGGT1_237000 | organism=Toxoplasma_gondii_GT1 | gene_product=CRAL-TRIO domain-containing protein [Source:UniProtKB/TrEMBL;Acc:A0A125YYL0] | transcript_product=putative polyphosphoinositide binding protein | location=TGGT1_chrX:5548842-5554225(-) | protein_length=335 | sequence_SO=chromosome | SO=protein_coding_gene | is_pseudo=false	0.008	2.226	2	1	1	1	335	38	7.88	2.53	1																														High	High	High	High
3.35946e+18	FALSE	High	IsMasterProtein	TGGT1_286550-t26_1-p1	transcript=TGGT1_286550-t26_1 | gene=TGGT1_286550 | organism=Toxoplasma_gondii_GT1 | gene_product=RNase_PH domain-containing protein [Source:UniProtKB/TrEMBL;Acc:S7W3A5] | transcript_product=hypothetical protein | location=TGGT1_chrV:1642526-1644017(+) | protein_length=223 | sequence_SO=chromosome | SO=protein_coding_gene | is_pseudo=false	0.003	2.915	12	1	1	1	223	23.9	5.16	2.77	1																														High	High	Not Found	High
-8.71469e+18	FALSE	High	IsMasterProtein	TGGT1_223855-t26_1-p1	transcript=TGGT1_223855-t26_1 | gene=TGGT1_223855 | organism=Toxoplasma_gondii_GT1 | gene_product=RRM domain-containing protein [Source:UniProtKB/TrEMBL;Acc:S7WBY7] | transcript_product=RNA recognition motif-containing protein | location=TGGT1_chrX:3429742-3436856(-) | protein_length=565 | sequence_SO=chromosome | SO=protein_coding_gene | is_pseudo=false	0	12.376	3	1	1	1	565	62.7	9.29	6.11	1																														High	High	High	High
8.37646e+18	FALSE	High	IsMasterProtein	TGGT1_213060-t26_1-p1	transcript=TGGT1_213060-t26_1 | gene=TGGT1_213060 | organism=Toxoplasma_gondii_GT1 | gene_product=WD_REPEATS_REGION domain-containing protein [Source:UniProtKB/TrEMBL;Acc:S7UP51] | transcript_product=WD domain, G-beta repeat-containing protein | location=TGGT1_chrV:694020-707306(+) | protein_length=3089 | sequence_SO=chromosome | SO=protein_coding_gene | is_pseudo=false	0.003	2.954	1	1	1	1	3089	328.1	7.15	2.25	1																														High	High	High	High
6.37614e+18	FALSE	Medium	IsMasterProtein	TGGT1_265460-t26_1-p1	transcript=TGGT1_265460-t26_1 | gene=TGGT1_265460 | organism=Toxoplasma_gondii_GT1 | gene_product=hypothetical protein | transcript_product=hypothetical protein | location=TGGT1_chrIX:1355045-1357966(-) | protein_length=521 | sequence_SO=chromosome | SO=protein_coding_gene | is_pseudo=false	0.012	2.001	3	1	1	1	521	53.7	7.71	3.16	1																														High	High	High	High
1.66855e+18	FALSE	High	IsMasterProtein	TGGT1_236220-t26_1-p1	transcript=TGGT1_236220-t26_1 | gene=TGGT1_236220 | organism=Toxoplasma_gondii_GT1 | gene_product=PCI domain-containing protein [Source:UniProtKB/TrEMBL;Acc:S7VZN2] | transcript_product=PCI domain-containing protein | location=TGGT1_chrX:5223328-5229647(-) | protein_length=678 | sequence_SO=chromosome | SO=protein_coding_gene | is_pseudo=false	0.001	4.542	1	1	1	1	678	75.4	5.82	2.68	1																														High	High	High	High
3.13495e+18	FALSE	High	IsMasterProtein	TGGT1_203170-t26_1-p1	transcript=TGGT1_203170-t26_1 | gene=TGGT1_203170 | organism=Toxoplasma_gondii_GT1 | gene_product=OB-fold nucleic acid binding domain-containing protein [Source:UniProtKB/TrEMBL;Acc:S7W3V1] | transcript_product=OB-fold nucleic acid binding domain-containing protein | location=TGGT1_chrVIIa:2609598-2619646(+) | protein_length=726 | sequence_SO=chromosome | SO=protein_coding_gene | is_pseudo=false	0.003	2.834	1	1	1	1	726	81.3	9.31	2.39	1																														High	High	High	High
7.80319e+18	FALSE	Medium	IsMasterProtein	TGGT1_226950-t26_1-p1	transcript=TGGT1_226950-t26_1 | gene=TGGT1_226950 | organism=Toxoplasma_gondii_GT1 | gene_product=IgA-specific metalloendopeptidase [Source:UniProtKB/TrEMBL;Acc:S7W5T7] | transcript_product=IgA-specific metalloendopeptidase | location=TGGT1_chrX:1106584-1115574(+) | protein_length=2042 | sequence_SO=chromosome | SO=protein_coding_gene | is_pseudo=false	0.024	1.59	1	1	1	1	2042	217.8	5.14	1.95	1																														High	High	High	High
6.82494e+18	FALSE	Low	IsMasterProtein	TGGT1_309940-t26_1-p1	transcript=TGGT1_309940-t26_1 | gene=TGGT1_309940 | organism=Toxoplasma_gondii_GT1 | gene_product=PLD phosphodiesterase domain-containing protein [Source:UniProtKB/TrEMBL;Acc:S7UT54] | transcript_product=phospholipase D active site domain-containing protein | location=TGGT1_chrXI:880938-890453(+) | protein_length=1186 | sequence_SO=chromosome | SO=protein_coding_gene | is_pseudo=false	0.058	1.124	1	1	1	1	1186	129.5	8.06	2.39	1																														High	High	High	High
8.61584e+18	FALSE	High	IsMasterProtein	TGGT1_231070-t26_1-p1	transcript=TGGT1_231070-t26_1 | gene=TGGT1_231070 | organism=Toxoplasma_gondii_GT1 | gene_product=Protein kinase domain-containing protein [Source:UniProtKB/TrEMBL;Acc:S7WIG3] | transcript_product=protein kinase | location=TGGT1_chrVIII:1218431-1222387(+) | protein_length=1318 | sequence_SO=chromosome | SO=protein_coding_gene | is_pseudo=false	0.004	2.682	1	1	1	1	1318	141.4	6.87	3.22	1																														High	High	High	High
4.41929e+18	FALSE	Medium	IsMasterProtein	TGGT1_205750-t26_1-p1	transcript=TGGT1_205750-t26_1 | gene=TGGT1_205750 | organism=Toxoplasma_gondii_GT1 | gene_product=HDAC_interact domain-containing protein [Source:UniProtKB/TrEMBL;Acc:S7UUL7] | transcript_product=histone deacetylase complex subunit Sin3 | location=TGGT1_chrVIIa:1085608-1090423(+) | protein_length=769 | sequence_SO=chromosome | SO=protein_coding_gene | is_pseudo=false	0.012	2.057	1	1	1	1	769	86.9	8.44	2.16	1																														High	High	High	High
1.39765e+18	FALSE	Medium	IsMasterProtein	TGGT1_285500-t26_1-p1	transcript=TGGT1_285500-t26_1 | gene=TGGT1_285500 | organism=Toxoplasma_gondii_GT1 | gene_product=hypothetical protein | transcript_product=hypothetical protein | location=TGGT1_chrV:2225125-2233785(+) | protein_length=1899 | sequence_SO=chromosome | SO=protein_coding_gene | is_pseudo=false	0.014	1.857	0	1	1	1	1899	206.3	7.18	2.41	1																														High	High	High	High
8.31622e+18	FALSE	High	IsMasterProtein	TGGT1_266030-t26_1-p1	transcript=TGGT1_266030-t26_1 | gene=TGGT1_266030 | organism=Toxoplasma_gondii_GT1 | gene_product=Pre-mRNA-splicing factor 38 [Source:UniProtKB/TrEMBL;Acc:S7UGR0] | transcript_product=putative pre-mRNA splicing factor | location=TGGT1_chrIX:1169984-1171558(-) | protein_length=524 | sequence_SO=chromosome | SO=protein_coding_gene | is_pseudo=false	0	12.36	2	1	2	1	524	63	8.88	7.97	1																														High	High	High	High
6.81512e+18	FALSE	High	IsMasterProtein	TGGT1_318720-t26_1-p1	transcript=TGGT1_318720-t26_1 | gene=TGGT1_318720 | organism=Toxoplasma_gondii_GT1 | gene_product=Pyridoxal phosphate homeostasis protein [Source:UniProtKB/TrEMBL;Acc:S7VYY5] | transcript_product=pyridoxal phosphate enzyme, YggS family protein | location=TGGT1_chrIV:1064618-1068972(-) | protein_length=548 | sequence_SO=chromosome | SO=protein_coding_gene | is_pseudo=false	0.002	3.934	3	1	1	1	548	60.5	8.69	3.48	1																														High	High	High	High
3.69999e+18	FALSE	High	IsMasterProtein	TGGT1_255635-t26_1-p1	transcript=TGGT1_255635-t26_1 | gene=TGGT1_255635 | organism=Toxoplasma_gondii_GT1 | gene_product=hypothetical protein | transcript_product=hypothetical protein | location=TGGT1_chrVIIb:4668387-4673772(-) | protein_length=642 | sequence_SO=chromosome | SO=protein_coding_gene | is_pseudo=false	0.002	3.833	2	1	1	1	642	68.4	8.24	2.73	1																														High	High	High	High
-7.33619e+18	FALSE	High	IsMasterProtein	TGGT1_270800-t26_1-p1	transcript=TGGT1_270800-t26_1 | gene=TGGT1_270800 | organism=Toxoplasma_gondii_GT1 | gene_product=GAF domain-containing protein [Source:UniProtKB/TrEMBL;Acc:S7V534] | transcript_product=GAF domain-containing protein | location=TGGT1_chrVIII:4984957-4987035(+) | protein_length=692 | sequence_SO=chromosome | SO=protein_coding_gene | is_pseudo=false	0.003	3.396	3	1	1	1	692	74.1	7.24	3.76	1																														High	High	High	High
-2.6948e+18	FALSE	Medium	IsMasterProtein	TGGT1_275840-t26_1-p1	transcript=TGGT1_275840-t26_1 | gene=TGGT1_275840 | organism=Toxoplasma_gondii_GT1 | gene_product=PPM-type phosphatase domain-containing protein [Source:UniProtKB/TrEMBL;Acc:S7UNL6] | transcript_product=protein phosphatase 2C domain-containing protein | location=TGGT1_chrIII:177308-186515(-) | protein_length=744 | sequence_SO=chromosome | SO=protein_coding_gene | is_pseudo=false	0.012	1.923	1	1	1	1	744	80.7	8.43	2.12	1																														High	High	High	High
8.53672e+18	FALSE	High	IsMasterProtein	TGGT1_275650-t26_1-p1	transcript=TGGT1_275650-t26_1 | gene=TGGT1_275650 | organism=Toxoplasma_gondii_GT1 | gene_product=hypothetical protein | transcript_product=hypothetical protein | location=TGGT1_chrIII:288290-290923(+) | protein_length=877 | sequence_SO=chromosome | SO=protein_coding_gene | is_pseudo=false	0.001	4.41	1	1	1	1	877	101.1	9.19	3.21	1																														High	High	High	High
-7.40918e+18	FALSE	High	IsMasterProtein	TGGT1_294860-t26_1-p1	transcript=TGGT1_294860-t26_1 | gene=TGGT1_294860 | organism=Toxoplasma_gondii_GT1 | gene_product=hypothetical protein | transcript_product=hypothetical protein | location=TGGT1_chrIa:1207560-1216549(+) | protein_length=2457 | sequence_SO=chromosome | SO=protein_coding_gene | is_pseudo=false	0.001	5.815	0	1	1	1	2457	254.7	6.65	3.3	1																														High	High	High	High
-7.07288e+17	FALSE	Low	IsMasterProtein	TGGT1_207590-t26_1-p1	transcript=TGGT1_207590-t26_1 | gene=TGGT1_207590 | organism=Toxoplasma_gondii_GT1 | gene_product=Protein phosphatase [Source:UniProtKB/TrEMBL;Acc:S7UJN4] | transcript_product=protein phosphatase 2C domain-containing protein | location=TGGT1_chrIb:157481-160091(+) | protein_length=533 | sequence_SO=chromosome | SO=protein_coding_gene | is_pseudo=false	0.065	1.078	2	1	1	1	533	57.8	5.91	2.16	1																														High	High	High	High
-4.03767e+18	FALSE	High	IsMasterProtein	TGGT1_291000-t26_1-p1	transcript=TGGT1_291000-t26_1 | gene=TGGT1_291000 | organism=Toxoplasma_gondii_GT1 | gene_product=PHD-finger domain-containing protein [Source:UniProtKB/TrEMBL;Acc:A0A125YKU0] | transcript_product=PHD-finger domain-containing protein | location=TGGT1_chrIX:3837626-3841934(+) | protein_length=527 | sequence_SO=chromosome | SO=protein_coding_gene | is_pseudo=false	0.003	3.15	2	1	1	1	527	57.1	6.68	2.78	1																														High	High	High	High
-7.21739e+18	FALSE	Medium	IsMasterProtein	TGGT1_308050-t26_1-p1	transcript=TGGT1_308050-t26_1 | gene=TGGT1_308050 | organism=Toxoplasma_gondii_GT1 | gene_product=Phosducin domain-containing protein [Source:UniProtKB/TrEMBL;Acc:A0A125YLZ9] | transcript_product=thioredoxin domain-containing protein | location=TGGT1_chrXII:478419-481148(+) | protein_length=198 | sequence_SO=chromosome | SO=protein_coding_gene | is_pseudo=false	0.021	1.655	4	1	1	1	198	22.6	6.32	2.15	1																														High	High	High	High
-5.53049e+18	FALSE	High	IsMasterProtein	TGGT1_216370-t26_1-p1	transcript=TGGT1_216370-t26_1 | gene=TGGT1_216370 | organism=Toxoplasma_gondii_GT1 | gene_product=hypothetical protein | transcript_product=hypothetical protein | location=TGGT1_chrXI:6125079-6126761(+) | protein_length=560 | sequence_SO=chromosome | SO=protein_coding_gene | is_pseudo=false	0	6.221	3	1	1	1	560	64.6	5.4	4.38	1																														High	High	High	High
2.0347e+18	FALSE	Medium	IsMasterProtein	TGGT1_261410-t26_1-p1	transcript=TGGT1_261410-t26_1 | gene=TGGT1_261410 | organism=Toxoplasma_gondii_GT1 | gene_product=DIX domain-containing protein [Source:UniProtKB/TrEMBL;Acc:S7W6W5] | transcript_product=protein-tyrosine-phosphatase | location=TGGT1_chrVIIb:1737178-1741612(+) | protein_length=440 | sequence_SO=chromosome | SO=protein_coding_gene | is_pseudo=false	0.012	2.059	3	1	1	1	440	47.8	7.18	2.86	1																														High	High	High	High
-8.46292e+18	FALSE	High	IsMasterProtein	TGGT1_263430-t26_1-p1	transcript=TGGT1_263430-t26_1 | gene=TGGT1_263430 | organism=Toxoplasma_gondii_GT1 | gene_product=3-hydroxyisobutyrate dehydrogenase [Source:UniProtKB/TrEMBL;Acc:S7UXD1] | transcript_product=3-hydroxyisobutyrate dehydrogenase | location=TGGT1_chrVIIb:530639-535283(+) | protein_length=320 | sequence_SO=chromosome | SO=protein_coding_gene | is_pseudo=false	0.002	3.919	3	1	1	1	320	34.1	7.5	3.08	1																														High	High	High	High
6.99497e+18	FALSE	High	IsMasterProtein	TGGT1_281950-t26_1-p1	transcript=TGGT1_281950-t26_1 | gene=TGGT1_281950 | organism=Toxoplasma_gondii_GT1 | gene_product=Putative membrane protein [Source:UniProtKB/TrEMBL;Acc:S7UW89] | transcript_product=putative membrane protein | location=TGGT1_chrVIIa:4183791-4186640(-) | protein_length=355 | sequence_SO=chromosome | SO=protein_coding_gene | is_pseudo=false	0	6.058	5	1	1	1	355	37.9	9.45	3.09	1																														High	High	High	High
7.93635e+18	FALSE	Low	IsMasterProtein	TGGT1_254250-t26_1-p1	transcript=TGGT1_254250-t26_1 | gene=TGGT1_254250 | organism=Toxoplasma_gondii_GT1 | gene_product=PRELI/MSF1 domain-containing protein [Source:UniProtKB/TrEMBL;Acc:S7W1Y0] | transcript_product=PRELI family protein | location=TGGT1_chrIII:1539597-1543028(-) | protein_length=485 | sequence_SO=chromosome | SO=protein_coding_gene | is_pseudo=false	0.059	1.108	2	1	1	1	485	53.6	8.5	2.33	1																														High	High	High	High
-4.24173e+18	FALSE	Medium	IsMasterProtein	TGGT1_278205-t26_1-p1	transcript=TGGT1_278205-t26_1 | gene=TGGT1_278205 | organism=Toxoplasma_gondii_GT1 | gene_product=hypothetical protein | transcript_product=hypothetical protein | location=TGGT1_chrXII:6140376-6167975(-) | protein_length=5626 | sequence_SO=chromosome | SO=protein_coding_gene | is_pseudo=false	0.05	1.219	0	1	1	1	5626	611.4	6.25	2.03	1																														High	High	High	High
7.95614e+18	FALSE	Medium	IsMasterProtein	TGGT1_211720-t26_1-p1	transcript=TGGT1_211720-t26_1 | gene=TGGT1_211720 | organism=Toxoplasma_gondii_GT1 | gene_product=AP2/ERF domain-containing protein [Source:UniProtKB/TrEMBL;Acc:S7VTE8] | transcript_product=AP2 domain transcription factor AP2IV-5 | location=TGGT1_chrIV:1499109-1505927(-) | protein_length=1966 | sequence_SO=chromosome | SO=protein_coding_gene | is_pseudo=false	0.012	1.965	0	1	1	1	1966	210.6	5.4	3.02	1																														High	High	High	High
-3.64176e+18	FALSE	High	IsMasterProtein	TGGT1_210778-t26_1-p1	transcript=TGGT1_210778-t26_1 | gene=TGGT1_210778 | organism=Toxoplasma_gondii_GT1 | gene_product=YccV-like domain-containing protein [Source:UniProtKB/TrEMBL;Acc:S7UKN8] | transcript_product=hemimethylated DNA binding domain-containing protein | location=TGGT1_chrIV:2010615-2016692(+) | protein_length=609 | sequence_SO=chromosome | SO=protein_coding_gene | is_pseudo=false	0.001	5.81	4	2	2	2	609	68.8	7.05	4.03	2																														High	High	High	High
2.06423e+18	FALSE	High	IsMasterProtein	TGGT1_236550-t26_1-p1	transcript=TGGT1_236550-t26_1 | gene=TGGT1_236550 | organism=Toxoplasma_gondii_GT1 | gene_product=hypothetical protein | transcript_product=hypothetical protein | location=TGGT1_chrX:5308357-5309874(-) | protein_length=165 | sequence_SO=chromosome | SO=protein_coding_gene | is_pseudo=false	0.003	2.863	7	1	1	1	165	18.2	9.67	2.64	1																														High	High	High	High
4.78891e+18	FALSE	High	IsMasterProtein	TGGT1_267480-t26_1-p1	transcript=TGGT1_267480-t26_1 | gene=TGGT1_267480 | organism=Toxoplasma_gondii_GT1 | gene_product=Putative tRNA (Guanine(26)-N(2))-dimethyltransferase [Source:UniProtKB/TrEMBL;Acc:S7UHU1] | transcript_product=putative tRNA (guanine(26)-N(2))-dimethyltransferase | location=TGGT1_chrIX:450756-457443(-) | protein_length=697 | sequence_SO=chromosome | SO=protein_coding_gene | is_pseudo=false	0	6.578	2	1	1	1	697	76.1	8.32	3.41	1																														High	High	High	High
-5.50272e+18	FALSE	High	IsMasterProtein	TGGT1_275568-t26_1-p1	transcript=TGGT1_275568-t26_1 | gene=TGGT1_275568 | organism=Toxoplasma_gondii_GT1 | gene_product=GPI transamidase subunit PIG-U protein [Source:UniProtKB/TrEMBL;Acc:S7UZZ5] | transcript_product=GPI transamidase subunit PIG-U protein | location=TGGT1_chrXII:6505394-6511917(-) | protein_length=548 | sequence_SO=chromosome | SO=protein_coding_gene | is_pseudo=false	0.003	3.466	2	1	1	1	548	60.9	8.35	2.71	1																														High	High	High	High
-3.0683e+18	FALSE	Low	IsMasterProtein	TGGT1_247280-t26_1-p1	transcript=TGGT1_247280-t26_1 | gene=TGGT1_247280 | organism=Toxoplasma_gondii_GT1 | gene_product=Rhodanese domain-containing protein [Source:UniProtKB/TrEMBL;Acc:S7WH43] | transcript_product=hypothetical protein | location=TGGT1_chrXII:3143508-3152898(-) | protein_length=2478 | sequence_SO=chromosome | SO=protein_coding_gene | is_pseudo=false	0.052	1.194	0	1	1	1	2478	269.4	6.28	1.86	1																														High	High	High	High
-5.23272e+17	FALSE	High	IsMasterProtein	TGGT1_255500-t26_1-p1	transcript=TGGT1_255500-t26_1 | gene=TGGT1_255500 | organism=Toxoplasma_gondii_GT1 | gene_product=hypothetical protein | transcript_product=hypothetical protein | location=TGGT1_chrVIIb:4692388-4695885(+) | protein_length=660 | sequence_SO=chromosome | SO=protein_coding_gene | is_pseudo=false	0.004	2.729	3	2	2	1	660	74.6	5.49	4.8	2																														High	High	High	High
-6.83268e+18	FALSE	Medium	IsMasterProtein	TGGT1_306630-t26_1-p1	transcript=TGGT1_306630-t26_1 | gene=TGGT1_306630 | organism=Toxoplasma_gondii_GT1 | gene_product=tRNA methyltransferase complex GCD14 subunit protein [Source:UniProtKB/TrEMBL;Acc:S7VWS2] | transcript_product=tRNA methyltransferase complex GCD14 subunit protein | location=TGGT1_chrIX:6008758-6013543(-) | protein_length=568 | sequence_SO=chromosome | SO=protein_coding_gene | is_pseudo=false	0.024	1.555	2	1	1	1	568	61.9	6.96	2.31	1																														High	High	High	High
-8.32012e+18	FALSE	High	IsMasterProtein	TGGT1_314020-t26_1-p1	transcript=TGGT1_314020-t26_1 | gene=TGGT1_314020 | organism=Toxoplasma_gondii_GT1 | gene_product=hypothetical protein | transcript_product=hypothetical protein | location=TGGT1_chrXI:3840878-3848889(-) | protein_length=1386 | sequence_SO=chromosome | SO=protein_coding_gene | is_pseudo=false	0.001	4.416	1	1	1	1	1386	151.7	6.95	2.87	1																														High	High	High	High
3.90911e+18	FALSE	Medium	IsMasterProtein	TGGT1_320040-t26_1-p1	transcript=TGGT1_320040-t26_1 | gene=TGGT1_320040 | organism=Toxoplasma_gondii_GT1 | gene_product=CHORD protein [Source:UniProtKB/TrEMBL;Acc:A0A125YV27] | transcript_product=CHORD protein | location=TGGT1_chrIV:504864-508157(-) | protein_length=196 | sequence_SO=chromosome | SO=protein_coding_gene | is_pseudo=false	0.033	1.404	4	1	1	1	196	22.1	7.47	2.15	1																														High	High	High	High
-2.37358e+18	FALSE	High	IsMasterProtein	TGGT1_300110-t26_1-p1	transcript=TGGT1_300110-t26_1 | gene=TGGT1_300110 | organism=Toxoplasma_gondii_GT1 | gene_product=hypothetical protein | transcript_product=hypothetical protein | location=TGGT1_chrXII:169162-172319(+) | protein_length=287 | sequence_SO=chromosome | SO=protein_coding_gene | is_pseudo=false	0.006	2.394	3	1	1	1	287	31.5	5.16	2.47	1																														High	High	High	High
6.90423e+18	FALSE	High	IsMasterProtein	TGGT1_231930-t26_1-p1	transcript=TGGT1_231930-t26_1 | gene=TGGT1_231930 | organism=Toxoplasma_gondii_GT1 | gene_product=RING-type domain-containing protein [Source:UniProtKB/TrEMBL;Acc:S7V3F4] | transcript_product=hypothetical protein | location=TGGT1_chrVIII:1647608-1653496(-) | protein_length=805 | sequence_SO=chromosome | SO=protein_coding_gene | is_pseudo=false	0.002	3.87	3	1	1	1	805	85.8	5.07	3.53	1																														High	High	High	High
-6.82232e+18	FALSE	High	IsMasterProtein	TGGT1_249800-t26_1-p1	transcript=TGGT1_249800-t26_1 | gene=TGGT1_249800 | organism=Toxoplasma_gondii_GT1 | gene_product=hypothetical protein | transcript_product=hypothetical protein | location=TGGT1_chrXII:4739984-4742611(-) | protein_length=753 | sequence_SO=chromosome | SO=protein_coding_gene | is_pseudo=false	0.001	5.815	3	1	1	1	753	80.5	4.61	4.95	1																														High	High	High	High
-3.59442e+18	FALSE	High	IsMasterProtein	TGGT1_213890-t26_1-p1	transcript=TGGT1_213890-t26_1 | gene=TGGT1_213890 | organism=Toxoplasma_gondii_GT1 | gene_product=SANT domain-containing protein [Source:UniProtKB/TrEMBL;Acc:S7UPD1] | transcript_product=Myb family DNA-binding domain-containing protein | location=TGGT1_chrV:1272830-1281627(+) | protein_length=1129 | sequence_SO=chromosome | SO=protein_coding_gene | is_pseudo=false	0.003	3.242	1	1	1	1	1129	118.2	9.23	2.94	1																														High	High	High	High
-6.81439e+18	FALSE	Medium	IsMasterProtein	TGGT1_260030-t26_1-p1	transcript=TGGT1_260030-t26_1 | gene=TGGT1_260030 | organism=Toxoplasma_gondii_GT1 | gene_product=Protein kinase domain-containing protein [Source:UniProtKB/TrEMBL;Acc:S7W765] | transcript_product=atypical MEK-related kinase (incomplete catalytic triad) | location=TGGT1_chrVIIb:2488342-2495420(-) | protein_length=814 | sequence_SO=chromosome | SO=protein_coding_gene | is_pseudo=false	0.014	1.855	1	1	1	1	814	88.5	5.91	2.02	1																														High	High	High	High
-5.75017e+18	FALSE	Medium	IsMasterProtein	TGGT1_225360-t26_1-p1	transcript=TGGT1_225360-t26_1 | gene=TGGT1_225360 | organism=Toxoplasma_gondii_GT1 | gene_product=hypothetical protein | transcript_product=hypothetical protein | location=TGGT1_chrX:2193035-2196689(-) | protein_length=756 | sequence_SO=chromosome | SO=protein_coding_gene | is_pseudo=false	0.015	1.83	1	1	1	1	756	82.2	6.3	2.43	1																														High	High	High	High
-4.5457e+18	FALSE	High	IsMasterProtein	TGGT1_293040-t26_1-p1	transcript=TGGT1_293040-t26_1 | gene=TGGT1_293040 | organism=Toxoplasma_gondii_GT1 | gene_product=hypothetical protein | transcript_product=hypothetical protein | location=TGGT1_chrIa:94058-94936(-) | protein_length=292 | sequence_SO=chromosome | SO=protein_coding_gene | is_pseudo=false	0.008	2.231	3	1	2	1	292	33.1	6.87	4.34	1																														High	High	High	High
-3.00724e+18	FALSE	Medium	IsMasterProtein	TGGT1_226890-t26_1-p1	transcript=TGGT1_226890-t26_1 | gene=TGGT1_226890 | organism=Toxoplasma_gondii_GT1 | gene_product=ORC_WH_C domain-containing protein [Source:UniProtKB/TrEMBL;Acc:S7WD02] | transcript_product=hypothetical protein | location=TGGT1_chrX:1166477-1173027(+) | protein_length=2068 | sequence_SO=chromosome | SO=protein_coding_gene | is_pseudo=false	0.04	1.319	0	1	1	1	2068	223.6	6.47	2.15	1																														High	High	High	High
-8.58649e+18	FALSE	Medium	IsMasterProtein	TGGT1_310610-t26_1-p1	transcript=TGGT1_310610-t26_1 | gene=TGGT1_310610 | organism=Toxoplasma_gondii_GT1 | gene_product=hypothetical protein | transcript_product=hypothetical protein | location=TGGT1_chrXI:1435011-1439063(-) | protein_length=435 | sequence_SO=chromosome | SO=protein_coding_gene | is_pseudo=false	0.012	1.929	2	1	1	1	435	43	5	2.75	1																														High	High	High	High
-3.58356e+18	FALSE	Low	IsMasterProtein	TGGT1_284610-t26_1-p1	transcript=TGGT1_284610-t26_1 | gene=TGGT1_284610 | organism=Toxoplasma_gondii_GT1 | gene_product=hypothetical protein | transcript_product=hypothetical protein | location=TGGT1_chrV:2524287-2525567(-) | protein_length=426 | sequence_SO=chromosome | SO=protein_coding_gene | is_pseudo=false	0.055	1.152	2	1	1	1	426	46.4	10.13	2.1	1																														High	High	High	High
-8.59301e+18	FALSE	Medium	IsMasterProtein	TGGT1_268660-t26_1-p1	transcript=TGGT1_268660-t26_1 | gene=TGGT1_268660 | organism=Toxoplasma_gondii_GT1 | gene_product=hypothetical protein | transcript_product=hypothetical protein | location=TGGT1_chrVIII:6371728-6372138(-) | protein_length=102 | sequence_SO=chromosome | SO=protein_coding_gene | is_pseudo=false	0.015	1.805	9	1	1	1	102	11.2	4.82	2.23	1																														High	High	High	High
-3.68255e+18	FALSE	High	IsMasterProtein	TGGT1_218880-t26_1-p1	transcript=TGGT1_218880-t26_1 | gene=TGGT1_218880 | organism=Toxoplasma_gondii_GT1 | gene_product=Putative SF-assemblin [Source:UniProtKB/TrEMBL;Acc:S7V259] | transcript_product=putative SF-assemblin | location=TGGT1_chrXII:1177534-1181051(-) | protein_length=268 | sequence_SO=chromosome | SO=protein_coding_gene | is_pseudo=false	0	7.173	9	2	2	2	268	30.6	5.26	5.49	2																														High	High	High	High
-4.30585e+17	FALSE	High	IsMasterProtein	TGGT1_246950-t26_1-p1	transcript=TGGT1_246950-t26_1 | gene=TGGT1_246950 | organism=Toxoplasma_gondii_GT1 | gene_product=hypothetical protein | transcript_product=hypothetical protein | location=TGGT1_chrXII:2962303-2964193(-) | protein_length=452 | sequence_SO=chromosome | SO=protein_coding_gene | is_pseudo=false	0.004	2.71	2	1	1	1	452	48.6	8.87	2.46	1																														High	High	High	High
-8.10357e+18	FALSE	High	IsMasterProtein	TGGT1_292320-t26_1-p1	transcript=TGGT1_292320-t26_1 | gene=TGGT1_292320 | organism=Toxoplasma_gondii_GT1 | gene_product=TGT domain-containing protein [Source:UniProtKB/TrEMBL;Acc:S7W3Z2] | transcript_product=hypothetical protein | location=TGGT1_chrIX:4486670-4489417(-) | protein_length=915 | sequence_SO=chromosome | SO=protein_coding_gene | is_pseudo=false	0.001	5.136	2	1	1	1	915	98.1	6.33	3.6	1																														High	High	High	High
2.16166e+18	FALSE	High	IsMasterProtein	TGGT1_311625-t26_1-p1	transcript=TGGT1_311625-t26_1 | gene=TGGT1_311625 | organism=Toxoplasma_gondii_GT1 | gene_product=WD domain, G-beta repeat-containing protein [Source:UniProtKB/TrEMBL;Acc:S7UTY8] | transcript_product=WD domain, G-beta repeat-containing protein | location=TGGT1_chrXI:2117911-2135414(-) | protein_length=4667 | sequence_SO=chromosome | SO=protein_coding_gene | is_pseudo=false	0.004	2.594	0	1	1	1	4667	501.9	6.46	3.04	1																														High	High	High	High
-6.41381e+18	FALSE	Medium	IsMasterProtein	TGGT1_259950-t26_1-p1	transcript=TGGT1_259950-t26_1 | gene=TGGT1_259950 | organism=Toxoplasma_gondii_GT1 | gene_product=Alpha-carbonic anhydrase domain-containing protein [Source:UniProtKB/TrEMBL;Acc:S7UY79] | transcript_product=carbonate dehydratase, eukaryotic-type domain-containing protein | location=TGGT1_chrVIIb:2572640-2576136(+) | protein_length=852 | sequence_SO=chromosome | SO=protein_coding_gene | is_pseudo=…	0.012	2.04	1	1	1	1	852	93.4	8.68	2.84	1																														High	High	High	High
1.14497e+18	FALSE	High	IsMasterProtein	TGGT1_310270-t26_1-p1	transcript=TGGT1_310270-t26_1 | gene=TGGT1_310270 | organism=Toxoplasma_gondii_GT1 | gene_product=hypothetical protein | transcript_product=hypothetical protein | location=TGGT1_chrXI:1165062-1173635(+) | protein_length=1357 | sequence_SO=chromosome | SO=protein_coding_gene | is_pseudo=false	0.003	2.994	1	1	1	1	1357	146	6.21	2.11	1																														High	High	High	High
1.12359e+18	FALSE	High	IsMasterProtein	TGGT1_244040-t26_1-p1	transcript=TGGT1_244040-t26_1 | gene=TGGT1_244040 | organism=Toxoplasma_gondii_GT1 | gene_product=HEAT repeat-containing protein [Source:UniProtKB/TrEMBL;Acc:S7UFP7] | transcript_product=HEAT repeat-containing protein | location=TGGT1_chrVI:2886249-2900429(-) | protein_length=1478 | sequence_SO=chromosome | SO=protein_coding_gene | is_pseudo=false	0.001	4.646	1	1	1	1	1478	164	6.02	3.06	1																														High	High	High	High
-4.04946e+18	FALSE	High	IsMasterProtein	TGGT1_271250-t26_1-p1	transcript=TGGT1_271250-t26_1 | gene=TGGT1_271250 | organism=Toxoplasma_gondii_GT1 | gene_product=KH domain-containing protein [Source:UniProtKB/TrEMBL;Acc:A0A125YXT3] | transcript_product=hypothetical protein | location=TGGT1_chrVIII:4617477-4618996(-) | protein_length=418 | sequence_SO=chromosome | SO=protein_coding_gene | is_pseudo=false	0.003	2.82	3	1	1	1	418	47.9	5.57	3.16	1																														High	High	High	High
7.41166e+18	FALSE	High	IsMasterProtein	TGGT1_262140-t26_1-p1	transcript=TGGT1_262140-t26_1 | gene=TGGT1_262140 | organism=Toxoplasma_gondii_GT1 | gene_product=Protein phosphatase methylesterase 1 [Source:UniProtKB/TrEMBL;Acc:A0A125YPW7] | transcript_product=putative chain a, pp2a-specific methylesterase apo form (pme) | location=TGGT1_chrVIIb:1319098-1324972(+) | protein_length=452 | sequence_SO=chromosome | SO=protein_coding_gene | is_pseudo=false	0.002	3.625	3	1	1	1	452	49.9	7.08	3.56	1																														High	High	High	High
-6.16062e+18	FALSE	High	IsMasterProtein	TGGT1_315910-t26_1-p1	transcript=TGGT1_315910-t26_1 | gene=TGGT1_315910 | organism=Toxoplasma_gondii_GT1 | gene_product=hypothetical protein | transcript_product=hypothetical protein | location=TGGT1_chrXI:5015685-5017412(+) | protein_length=575 | sequence_SO=chromosome | SO=protein_coding_gene | is_pseudo=false	0	9.706	3	1	2	1	575	62.7	4.16	9.95	1																														High	High	High	High
8.7286e+17	FALSE	High	IsMasterProtein	TGGT1_248400-t26_1-p1	transcript=TGGT1_248400-t26_1 | gene=TGGT1_248400 | organism=Toxoplasma_gondii_GT1 | gene_product=Lactoylglutathione lyase [Source:UniProtKB/TrEMBL;Acc:S7V0K3] | transcript_product=putative glyoxalase I | location=TGGT1_chrXII:3765918-3768100(-) | protein_length=336 | sequence_SO=chromosome | SO=protein_coding_gene | is_pseudo=false	0.002	4.091	4	1	1	1	336	38.5	6.33	3.85	1																														High	High	High	High
-2.23569e+18	FALSE	High	IsMasterProtein	TGGT1_276210-t26_1-p1	transcript=TGGT1_276210-t26_1 | gene=TGGT1_276210 | organism=Toxoplasma_gondii_GT1 | gene_product=Phosphoglycerate mutase family protein [Source:UniProtKB/TrEMBL;Acc:S7UNF6] | transcript_product=phosphoglycerate mutase family protein | location=TGGT1_chrIII:31225-34235(+) | protein_length=825 | sequence_SO=chromosome | SO=protein_coding_gene | is_pseudo=false	0	9.182	4	2	2	2	825	91.8	9.44	7.51	2																														High	High	High	High
-9.1015e+18	FALSE	High	IsMasterProtein	TGGT1_251590-t26_1-p1	transcript=TGGT1_251590-t26_1 | gene=TGGT1_251590 | organism=Toxoplasma_gondii_GT1 | gene_product=hypothetical protein | transcript_product=hypothetical protein | location=TGGT1_chrXII:5394097-5398047(-) | protein_length=825 | sequence_SO=chromosome | SO=protein_coding_gene | is_pseudo=false	0.001	5.603	1	1	1	1	825	88.6	7.47	2.75	1																														High	High	High	High
-1.07989e+18	FALSE	High	IsMasterProtein	TGGT1_273800-t26_1-p1	transcript=TGGT1_273800-t26_1 | gene=TGGT1_273800 | organism=Toxoplasma_gondii_GT1 | gene_product=WD_REPEATS_REGION domain-containing protein [Source:UniProtKB/TrEMBL;Acc:S7V3G9] | transcript_product=WD domain, G-beta repeat-containing protein | location=TGGT1_chrVIII:3241752-3255404(+) | protein_length=3633 | sequence_SO=chromosome | SO=protein_coding_gene | is_pseudo=false	0.004	2.568	0	1	1	1	3633	381.1	7.33	2.38	1																														High	High	High	High
8.91841e+18	FALSE	High	IsMasterProtein	TGGT1_258680-t26_1-p1	transcript=TGGT1_258680-t26_1 | gene=TGGT1_258680 | organism=Toxoplasma_gondii_GT1 | gene_product=TATA-box binding protein TBP2 [Source:UniProtKB/TrEMBL;Acc:S7UZ25] | transcript_product=TATA-box binding protein TBP2 | location=TGGT1_chrVIIb:3227470-3230255(+) | protein_length=549 | sequence_SO=chromosome | SO=protein_coding_gene | is_pseudo=false	0.005	2.502	2	1	1	1	549	57.8	5.19	2.39	1																														High	High	High	High
-6.09509e+18	FALSE	Medium	IsMasterProtein	TGGT1_249860-t26_1-p1	transcript=TGGT1_249860-t26_1 | gene=TGGT1_249860 | organism=Toxoplasma_gondii_GT1 | gene_product=hypothetical protein | transcript_product=hypothetical protein | location=TGGT1_chrXII:4841303-4848762(-) | protein_length=802 | sequence_SO=chromosome | SO=protein_coding_gene | is_pseudo=false	0.03	1.471	1	1	1	1	802	90.2	4.98	2.24	1																														High	High	High	High
-2.70047e+18	FALSE	Medium	IsMasterProtein	TGGT1_202550-t26_1-p1	transcript=TGGT1_202550-t26_1 | gene=TGGT1_202550 | organism=Toxoplasma_gondii_GT1 | gene_product=FCP1 homology domain-containing protein [Source:UniProtKB/TrEMBL;Acc:S7UV08] | transcript_product=NLI interacting factor family phosphatase | location=TGGT1_chrVIIa:3125453-3133382(+) | protein_length=2212 | sequence_SO=chromosome | SO=protein_coding_gene | is_pseudo=false	0.021	1.665	1	1	1	1	2212	232.8	6.96	2.41	1																														High	High	High	High
3.84534e+18	FALSE	Medium	IsMasterProtein	TGGT1_285445-t26_1-p1	transcript=TGGT1_285445-t26_1 | gene=TGGT1_285445 | organism=Toxoplasma_gondii_GT1 | gene_product=CULLIN_2 domain-containing protein [Source:UniProtKB/TrEMBL;Acc:S7UNQ1] | transcript_product=hypothetical protein | location=TGGT1_chrV:2266459-2279676(-) | protein_length=2442 | sequence_SO=chromosome | SO=protein_coding_gene | is_pseudo=false	0.036	1.363	0	1	1	1	2442	266.1	8.5	2.43	1																														High	High	High	High
4.55484e+18	FALSE	High	IsMasterProtein	TGGT1_288550-t26_1-p1	transcript=TGGT1_288550-t26_1 | gene=TGGT1_288550 | organism=Toxoplasma_gondii_GT1 | gene_product=hypothetical protein | transcript_product=hypothetical protein | location=TGGT1_chrIX:2421057-2424084(-) | protein_length=423 | sequence_SO=chromosome | SO=protein_coding_gene | is_pseudo=false	0.002	3.617	3	1	1	1	423	46.4	7.58	2.93	1																														High	High	High	High
-4.98983e+18	FALSE	High	IsMasterProtein	TGGT1_254420-t26_1-p1	transcript=TGGT1_254420-t26_1 | gene=TGGT1_254420 | organism=Toxoplasma_gondii_GT1 | gene_product=Phospholipase, patatin family protein [Source:UniProtKB/TrEMBL;Acc:S7VVK9] | transcript_product=phospholipase, patatin family protein | location=TGGT1_chrIII:1703961-1713345(+) | protein_length=1173 | sequence_SO=chromosome | SO=protein_coding_gene | is_pseudo=false	0.003	3.167	2	2	2	2	1173	127.2	6.77	5.6	2																														High	High	High	High
-9.13232e+18	FALSE	Medium	IsMasterProtein	TGGT1_297245-t26_1-p1	transcript=TGGT1_297245-t26_1 | gene=TGGT1_297245 | organism=Toxoplasma_gondii_GT1 | gene_product=Transporter, major facilitator family protein [Source:UniProtKB/TrEMBL;Acc:S7VZH2] | transcript_product=transporter, major facilitator family protein | location=TGGT1_chrII:1613632-1620479(-) | protein_length=652 | sequence_SO=chromosome | SO=protein_coding_gene | is_pseudo=false	0.031	1.445	2	1	1	1	652	68.7	8.53	2.78	1																														High	High	High	High
-9.13274e+18	FALSE	High	IsMasterProtein	TGGT1_209000-t26_1-p1	transcript=TGGT1_209000-t26_1 | gene=TGGT1_209000 | organism=Toxoplasma_gondii_GT1 | gene_product=HECT-domain (Ubiquitin-transferase) domain-containing protein [Source:UniProtKB/TrEMBL;Acc:S7UJI8] | transcript_product=HECT-domain (ubiquitin-transferase) domain-containing protein | location=TGGT1_chrIb:956370-995183(-) | protein_length=12302 | sequence_SO=chromosome | SO=protein_coding_gene | is_p…	0.006	2.424	0	1	1	1	12302	1311.2	7.09	2.56	1																														High	High	High	High
-7.9246e+18	FALSE	High	IsMasterProtein	TGGT1_319930-t26_1-p1	transcript=TGGT1_319930-t26_1 | gene=TGGT1_319930 | organism=Toxoplasma_gondii_GT1 | gene_product=hypothetical protein | transcript_product=hypothetical protein | location=TGGT1_chrIV:591656-600022(-) | protein_length=1134 | sequence_SO=chromosome | SO=protein_coding_gene | is_pseudo=false	0.002	3.772	1	1	2	1	1134	121.3	4.75	4.82	1																														High	High	High	High
7.64334e+18	FALSE	High	IsMasterProtein	TGGT1_290240-t26_1-p1	transcript=TGGT1_290240-t26_1 | gene=TGGT1_290240 | organism=Toxoplasma_gondii_GT1 | gene_product=hypothetical protein | transcript_product=hypothetical protein | location=TGGT1_chrIX:3470859-3474815(+) | protein_length=792 | sequence_SO=chromosome | SO=protein_coding_gene | is_pseudo=false	0.005	2.49	1	1	1	1	792	88.3	6.89	3.13	1																														High	High	High	High
5.57898e+18	FALSE	High	IsMasterProtein	TGGT1_227980-t26_1-p1	transcript=TGGT1_227980-t26_1 | gene=TGGT1_227980 | organism=Toxoplasma_gondii_GT1 | gene_product=hypothetical protein | transcript_product=hypothetical protein | location=TGGT1_chrX:604563-607952(+) | protein_length=802 | sequence_SO=chromosome | SO=protein_coding_gene | is_pseudo=false	0.003	3.206	1	1	1	1	802	82	7.75	2.59	1																														Not Found	Not Found	Not Found	Not Found
5.60917e+18	FALSE	Medium	IsMasterProtein	TGGT1_241150-t26_1-p1	transcript=TGGT1_241150-t26_1 | gene=TGGT1_241150 | organism=Toxoplasma_gondii_GT1 | gene_product=N2227 domain-containing protein [Source:UniProtKB/TrEMBL;Acc:S7W0D7] | transcript_product=hypothetical protein | location=TGGT1_chrVI:1620097-1626374(-) | protein_length=592 | sequence_SO=chromosome | SO=protein_coding_gene | is_pseudo=false	0.02	1.688	1	1	1	1	592	65.1	5.63	1.92	1																														High	High	High	High
1.6266e+16	FALSE	High	IsMasterProtein	TGGT1_271280-t26_1-p1	transcript=TGGT1_271280-t26_1 | gene=TGGT1_271280 | organism=Toxoplasma_gondii_GT1 | gene_product=60S ribosome subunit biogenesis protein NIP7 homolog [Source:UniProtKB/TrEMBL;Acc:A0A125YWY6] | transcript_product=putative 60S ribosome subunit biogenesis protein NIP7 | location=TGGT1_chrVIII:4602984-4605429(+) | protein_length=181 | sequence_SO=chromosome | SO=protein_coding_gene | is_pseudo=false	0.003	2.812	4	1	1	1	181	20.4	8.43	2.53	1																														High	High	High	High
-2.00901e+18	FALSE	Medium	IsMasterProtein	TGGT1_285220-t26_1-p1	transcript=TGGT1_285220-t26_1 | gene=TGGT1_285220 | organism=Toxoplasma_gondii_GT1 | gene_product=CAP-Gly domain-containing protein [Source:UniProtKB/TrEMBL;Acc:S7W2Z8] | transcript_product=CAP-Gly domain-containing protein | location=TGGT1_chrV:2368641-2377488(+) | protein_length=781 | sequence_SO=chromosome | SO=protein_coding_gene | is_pseudo=false	0.012	2	2	1	1	1	781	84.7	6.05	0	1																														High	High	High	High
9.69824e+17	FALSE	High	IsMasterProtein	TGGT1_263290-t26_1-p1	transcript=TGGT1_263290-t26_1 | gene=TGGT1_263290 | organism=Toxoplasma_gondii_GT1 | gene_product=RHOMBOID-like protein [Source:UniProtKB/TrEMBL;Acc:S7UXN0] | transcript_product=rhomboid protease ROM2 | location=TGGT1_chrVIIb:625248-629940(-) | protein_length=283 | sequence_SO=chromosome | SO=protein_coding_gene | is_pseudo=false	0.002	3.87	4	1	1	1	283	30.6	7.05	3.33	1																														High	High	High	High
-7.80528e+18	FALSE	High	IsMasterProtein	TGGT1_285240-t26_1-p1	transcript=TGGT1_285240-t26_1 | gene=TGGT1_285240 | organism=Toxoplasma_gondii_GT1 | gene_product=S5A_REDUCTASE domain-containing protein [Source:UniProtKB/TrEMBL;Acc:A0A125YK59] | transcript_product=3-oxo-5-alpha-steroid 4-dehydrogenase | location=TGGT1_chrV:2347912-2353553(-) | protein_length=347 | sequence_SO=chromosome | SO=protein_coding_gene | is_pseudo=false	0.006	2.449	3	1	1	1	347	40.1	10.87	0	1																														Not Found	Not Found	Not Found	Not Found
2.19337e+18	FALSE	High	IsMasterProtein	TGGT1_314700-t26_1-p1	transcript=TGGT1_314700-t26_1 | gene=TGGT1_314700 | organism=Toxoplasma_gondii_GT1 | gene_product=hypothetical protein | transcript_product=hypothetical protein | location=TGGT1_chrXI:4176267-4180811(-) | protein_length=1237 | sequence_SO=chromosome | SO=protein_coding_gene | is_pseudo=false	0	9.112	2	1	1	1	1237	134.6	7.06	5.7	1																														High	High	High	High
8.25594e+16	FALSE	High	IsMasterProtein	TGGT1_411470-t26_1-p1	transcript=TGGT1_411470-t26_1 | gene=TGGT1_411470 | organism=Toxoplasma_gondii_GT1 | gene_product=Putative transmembrane protein [Source:UniProtKB/TrEMBL;Acc:S7UG13] | transcript_product=putative transmembrane protein | location=AAQM03000493:218-1321(-) | protein_length=367 | sequence_SO=contig | SO=protein_coding_gene | is_pseudo=false	0	83.646	30	9	28	1	367	40.3	7.44	131.95	9																														High	High	High	High
6.67355e+18	FALSE	High	IsMasterProtein	TGGT1_277990-t26_1-p1	transcript=TGGT1_277990-t26_1 | gene=TGGT1_277990 | organism=Toxoplasma_gondii_GT1 | gene_product=OTU domain-containing protein [Source:UniProtKB/TrEMBL;Acc:S7V096] | transcript_product=OTU family cysteine protease | location=TGGT1_chrXII:6282649-6284331(-) | protein_length=506 | sequence_SO=chromosome | SO=protein_coding_gene | is_pseudo=false	0.001	5.252	5	2	2	2	506	55.5	7.5	5.7	2																														High	High	High	High
-5.68587e+18	FALSE	Medium	IsMasterProtein	TGGT1_237410-t26_1-p1	transcript=TGGT1_237410-t26_1 | gene=TGGT1_237410 | organism=Toxoplasma_gondii_GT1 | gene_product=PPM-type phosphatase domain-containing protein [Source:UniProtKB/TrEMBL;Acc:S7W5F9] | transcript_product=protein phosphatase 2C domain-containing protein | location=TGGT1_chrX:5736246-5740962(-) | protein_length=1497 | sequence_SO=chromosome | SO=protein_coding_gene | is_pseudo=false	0.011	2.114	1	1	1	1	1497	160.4	6.73	0	1																														Not Found	Not Found	Not Found	Not Found
-7.59209e+17	FALSE	High	IsMasterProtein	TGGT1_262990-t26_1-p1	transcript=TGGT1_262990-t26_1 | gene=TGGT1_262990 | organism=Toxoplasma_gondii_GT1 | gene_product=hypothetical protein | transcript_product=hypothetical protein | location=TGGT1_chrVIIb:851355-857400(-) | protein_length=1634 | sequence_SO=chromosome | SO=protein_coding_gene | is_pseudo=false	0.004	2.591	1	1	1	1	1634	176.1	6.65	3.28	1																														High	High	High	High
-2.11094e+18	FALSE	High	IsMasterProtein	TGGT1_223840-t26_1-p1	transcript=TGGT1_223840-t26_1 | gene=TGGT1_223840 | organism=Toxoplasma_gondii_GT1 | gene_product=Putative ATP-citrate lyase [Source:UniProtKB/TrEMBL;Acc:S7UW82] | transcript_product=putative ATP-citrate lyase | location=TGGT1_chrX:3444517-3448806(-) | protein_length=1281 | sequence_SO=chromosome | SO=protein_coding_gene | is_pseudo=false	0.004	2.675	1	1	1	1	1281	139.7	6.57	2.6	1																														High	High	High	High
4.76836e+18	FALSE	High	IsMasterProtein	TGGT1_243390-t26_1-p1	transcript=TGGT1_243390-t26_1 | gene=TGGT1_243390 | organism=Toxoplasma_gondii_GT1 | gene_product=DUF2012 domain-containing protein [Source:UniProtKB/TrEMBL;Acc:S7UEE2] | transcript_product=hypothetical protein | location=TGGT1_chrVI:2520721-2521734(+) | protein_length=337 | sequence_SO=chromosome | SO=protein_coding_gene | is_pseudo=false	0.007	2.372	4	1	1	1	337	36.6	7.21	2.67	1																														High	High	High	High
3.93265e+18	FALSE	High	IsMasterProtein	TGGT1_260340-t26_1-p1	transcript=TGGT1_260340-t26_1 | gene=TGGT1_260340 | organism=Toxoplasma_gondii_GT1 | gene_product=DNL-type domain-containing protein [Source:UniProtKB/TrEMBL;Acc:S7UYX5] | transcript_product=DNL zinc finger protein | location=TGGT1_chrVIIb:2318114-2320937(+) | protein_length=261 | sequence_SO=chromosome | SO=protein_coding_gene | is_pseudo=false	0.009	2.214	3	1	1	1	261	27	8.06	2.47	1																														High	High	High	High
1.28529e+18	FALSE	High	IsMasterProtein	TGGT1_201790-t26_1-p1	transcript=TGGT1_201790-t26_1 | gene=TGGT1_201790 | organism=Toxoplasma_gondii_GT1 | gene_product=FHA domain-containing protein [Source:UniProtKB/TrEMBL;Acc:S7UV44] | transcript_product=FHA domain-containing protein | location=TGGT1_chrVIIa:3683201-3688810(-) | protein_length=556 | sequence_SO=chromosome | SO=protein_coding_gene | is_pseudo=false	0.001	5.7	3	1	1	1	556	62.6	9.55	4.25	1																														High	High	High	High
5.96586e+18	FALSE	Medium	IsMasterProtein	TGGT1_209250-t26_1-p1	transcript=TGGT1_209250-t26_1 | gene=TGGT1_209250 | organism=Toxoplasma_gondii_GT1 | gene_product=hypothetical protein | transcript_product=hypothetical protein | location=TGGT1_chrIb:1161236-1166853(+) | protein_length=1018 | sequence_SO=chromosome | SO=protein_coding_gene | is_pseudo=false	0.033	1.393	1	1	1	1	1018	108.8	7.08	1.69	1																														High	High	High	High
3.03825e+18	FALSE	High	IsMasterProtein	TGGT1_312490-t26_1-p1	transcript=TGGT1_312490-t26_1 | gene=TGGT1_312490 | organism=Toxoplasma_gondii_GT1 | gene_product=hypothetical protein | transcript_product=hypothetical protein | location=TGGT1_chrXI:2688508-2693146(+) | protein_length=443 | sequence_SO=chromosome | SO=protein_coding_gene | is_pseudo=false	0.001	4.984	4	2	3	2	443	49	11	7.43	2																														High	High	High	High
-8.09701e+18	FALSE	Medium	IsMasterProtein	TGGT1_311830-t26_1-p1	transcript=TGGT1_311830-t26_1 | gene=TGGT1_311830 | organism=Toxoplasma_gondii_GT1 | gene_product=hypothetical protein | transcript_product=hypothetical protein | location=TGGT1_chrXI:2276009-2277160(+) | protein_length=145 | sequence_SO=chromosome | SO=protein_coding_gene | is_pseudo=false	0.049	1.22	5	1	1	1	145	16.3	9.73	2.5	1																														High	High	High	High
-8.09645e+18	FALSE	High	IsMasterProtein	TGGT1_288620-t26_1-p1	transcript=TGGT1_288620-t26_1 | gene=TGGT1_288620 | organism=Toxoplasma_gondii_GT1 | gene_product=Sulfhydryl oxidase [Source:UniProtKB/TrEMBL;Acc:A0A125YQC5] | transcript_product=Erv1 / Alr family protein | location=TGGT1_chrIX:2451913-2453502(-) | protein_length=204 | sequence_SO=chromosome | SO=protein_coding_gene | is_pseudo=false	0.002	3.713	5	1	1	1	204	22.2	6.43	2.94	1																														High	High	High	High
-7.45744e+18	FALSE	Medium	IsMasterProtein	TGGT1_264690-t26_1-p1	transcript=TGGT1_264690-t26_1 | gene=TGGT1_264690 | organism=Toxoplasma_gondii_GT1 | gene_product=Putative cyclin 4 [Source:UniProtKB/TrEMBL;Acc:S7UFU0] | transcript_product=putative cyclin 4 | location=TGGT1_chrIX:1927814-1932076(-) | protein_length=634 | sequence_SO=chromosome | SO=protein_coding_gene | is_pseudo=false	0.023	1.614	1	1	1	1	634	69.9	9.16	2.42	1																														High	High	High	High
5.86203e+18	FALSE	Medium	IsMasterProtein	TGGT1_256880-t26_1-p1	transcript=TGGT1_256880-t26_1 | gene=TGGT1_256880 | organism=Toxoplasma_gondii_GT1 | gene_product=Protein kinase domain-containing protein [Source:UniProtKB/TrEMBL;Acc:S7UZK5] | transcript_product=protein kinase domain-containing protein | location=TGGT1_chrVIIb:4312559-4321139(+) | protein_length=1898 | sequence_SO=chromosome | SO=protein_coding_gene | is_pseudo=false	0.021	1.654	0	1	1	1	1898	207.1	7.4	2.23	1																														High	High	High	High
1.22734e+18	FALSE	Low	IsMasterProtein	TGGT1_291080-t26_1-p1	transcript=TGGT1_291080-t26_1 | gene=TGGT1_291080 | organism=Toxoplasma_gondii_GT1 | gene_product=TATA-box binding protein TBP1 [Source:UniProtKB/TrEMBL;Acc:A0A125YP74] | transcript_product=TATA-box binding protein TBP1 | location=TGGT1_chrIX:3916076-3917860(-) | protein_length=288 | sequence_SO=chromosome | SO=protein_coding_gene | is_pseudo=false	0.056	1.135	3	1	1	1	288	31.5	6.23	0	1																														Not Found	High	High	High
-8.01614e+18	FALSE	High	IsMasterProtein	TGGT1_213240-t26_1-p1	transcript=TGGT1_213240-t26_1 | gene=TGGT1_213240 | organism=Toxoplasma_gondii_GT1 | gene_product=hypothetical protein | transcript_product=hypothetical protein | location=TGGT1_chrV:737995-741306(-) | protein_length=781 | sequence_SO=chromosome | SO=protein_coding_gene | is_pseudo=false	0.003	3.338	1	1	1	1	781	82.4	10.02	3.39	1																														High	High	High	High
7.79488e+18	FALSE	High	IsMasterProtein	TGGT1_294720-t26_1-p1	transcript=TGGT1_294720-t26_1 | gene=TGGT1_294720 | organism=Toxoplasma_gondii_GT1 | gene_product=RING-type domain-containing protein [Source:UniProtKB/TrEMBL;Acc:A0A125YW84] | transcript_product=hypothetical protein | location=TGGT1_chrIa:1077965-1080988(+) | protein_length=1007 | sequence_SO=chromosome | SO=protein_coding_gene | is_pseudo=false	0.004	2.615	1	1	1	1	1007	107.3	4.75	2.25	1																														High	High	High	High
-7.57831e+18	FALSE	High	IsMasterProtein	TGGT1_212990-t26_1-p1	transcript=TGGT1_212990-t26_1 | gene=TGGT1_212990 | organism=Toxoplasma_gondii_GT1 | gene_product=hypothetical protein | transcript_product=hypothetical protein | location=TGGT1_chrV:626448-635544(+) | protein_length=1064 | sequence_SO=chromosome | SO=protein_coding_gene | is_pseudo=false	0.004	2.649	1	1	1	1	1064	113.6	8.4	2.87	1																														Not Found	Not Found	Not Found	Not Found
-2.55715e+18	FALSE	High	IsMasterProtein	TGGT1_306380-t26_1-p1	transcript=TGGT1_306380-t26_1 | gene=TGGT1_306380 | organism=Toxoplasma_gondii_GT1 | gene_product=Matrin-type domain-containing protein [Source:UniProtKB/TrEMBL;Acc:A0A125YKT8] | transcript_product=U1 zinc finger protein | location=TGGT1_chrIX:5823122-5824942(-) | protein_length=215 | sequence_SO=chromosome | SO=protein_coding_gene | is_pseudo=false	0.003	2.985	4	1	1	1	215	22.1	10.77	3.06	1																														High	High	High	High
-3.31027e+18	FALSE	High	IsMasterProtein	TGGT1_271800-t26_1-p1	transcript=TGGT1_271800-t26_1 | gene=TGGT1_271800 | organism=Toxoplasma_gondii_GT1 | gene_product=DUF676 domain-containing protein [Source:UniProtKB/TrEMBL;Acc:S7V3M8] | transcript_product=serine esterase (DUF676) protein | location=TGGT1_chrVIII:4352307-4357737(-) | protein_length=820 | sequence_SO=chromosome | SO=protein_coding_gene | is_pseudo=false	0.001	4.98	1	1	1	1	820	87.5	4.78	3.49	1																														High	High	High	High
-2.94359e+18	FALSE	High	IsMasterProtein	TGGT1_218070-t26_1-p1	transcript=TGGT1_218070-t26_1 | gene=TGGT1_218070 | organism=Toxoplasma_gondii_GT1 | gene_product=NOC3p domain-containing protein [Source:UniProtKB/TrEMBL;Acc:S7V1Z3] | transcript_product=hypothetical protein | location=TGGT1_chrXII:1669273-1677304(-) | protein_length=1742 | sequence_SO=chromosome | SO=protein_coding_gene | is_pseudo=false	0.002	3.628	1	1	2	1	1742	185.7	7.55	4.59	1																														High	High	High	High
-5.26365e+18	FALSE	High	IsMasterProtein	TGGT1_227952-t26_1-p1	transcript=TGGT1_227952-t26_1 | gene=TGGT1_227952 | organism=Toxoplasma_gondii_GT1 | gene_product=14_3_3 domain-containing protein [Source:UniProtKB/TrEMBL;Acc:S7WD67] | transcript_product=14-3-3 superfamily protein | location=TGGT1_chrX:621123-624301(+) | protein_length=422 | sequence_SO=chromosome | SO=protein_coding_gene | is_pseudo=false	0.004	2.634	2	1	1	1	422	48	9.45	1.94	1																														High	High	High	High
-7.58389e+18	FALSE	High	IsMasterProtein	TGGT1_230990-t26_1-p1	transcript=TGGT1_230990-t26_1 | gene=TGGT1_230990 | organism=Toxoplasma_gondii_GT1 | gene_product=hypothetical protein | transcript_product=hypothetical protein | location=TGGT1_chrVIII:1171049-1174495(+) | protein_length=1148 | sequence_SO=chromosome | SO=protein_coding_gene | is_pseudo=false	0.001	5.759	2	1	1	1	1148	124.9	6.7	4.8	1																														High	High	High	High
5.8591e+18	FALSE	Medium	IsMasterProtein	TGGT1_220320-t26_1-p1	transcript=TGGT1_220320-t26_1 | gene=TGGT1_220320 | organism=Toxoplasma_gondii_GT1 | gene_product=BSD domain-containing protein [Source:UniProtKB/TrEMBL;Acc:S7VPC6] | transcript_product=BSD domain-containing protein | location=TGGT1_chrV:190287-194052(+) | protein_length=319 | sequence_SO=chromosome | SO=protein_coding_gene | is_pseudo=false	0.016	1.757	3	1	1	1	319	34.2	5.15	2.84	1																														High	High	High	High
1.55589e+18	FALSE	High	IsMasterProtein	TGGT1_263323-t26_1-p1	transcript=TGGT1_263323-t26_1 | gene=TGGT1_263323 | organism=Toxoplasma_gondii_GT1 | gene_product=TPR_REGION domain-containing protein [Source:UniProtKB/TrEMBL;Acc:S7W678] | transcript_product=putative tetratricopeptide repeat protein 11 | location=TGGT1_chrVIIb:606619-611392(+) | protein_length=144 | sequence_SO=chromosome | SO=protein_coding_gene | is_pseudo=false	0.003	3.468	10	2	3	1	144	16.4	6.16	7.11	2																														High	High	High	High
-4.64208e+18	FALSE	High	IsMasterProtein	TGGT1_244290-t26_1-p1	transcript=TGGT1_244290-t26_1 | gene=TGGT1_244290 | organism=Toxoplasma_gondii_GT1 | gene_product=AP4E_app_platf domain-containing protein [Source:UniProtKB/TrEMBL;Acc:S7UFM1] | transcript_product=adapter-related protein | location=TGGT1_chrVI:3073224-3084978(-) | protein_length=1116 | sequence_SO=chromosome | SO=protein_coding_gene | is_pseudo=false	0.001	4.233	2	1	1	1	1116	119.9	7.15	3.5	1																														High	High	High	High
-8.04897e+18	FALSE	High	IsMasterProtein	TGGT1_249310-t26_1-p1	transcript=TGGT1_249310-t26_1 | gene=TGGT1_249310 | organism=Toxoplasma_gondii_GT1 | gene_product=hypothetical protein | transcript_product=hypothetical protein | location=TGGT1_chrXII:4380897-4384574(+) | protein_length=337 | sequence_SO=chromosome | SO=protein_coding_gene | is_pseudo=false	0	8.198	6	1	1	1	337	36.1	5.44	3.55	1																														High	High	High	High
-7.56836e+18	FALSE	High	IsMasterProtein	TGGT1_240830-t26_1-p1	transcript=TGGT1_240830-t26_1 | gene=TGGT1_240830 | organism=Toxoplasma_gondii_GT1 | gene_product=AB hydrolase-1 domain-containing protein [Source:UniProtKB/TrEMBL;Acc:S7US86] | transcript_product=hydrolase, alpha/beta fold family protein | location=TGGT1_chrVI:1433325-1435100(-) | protein_length=591 | sequence_SO=chromosome | SO=protein_coding_gene | is_pseudo=false	0.004	2.564	2	1	1	1	591	65.1	9.82	2.01	1																														High	High	High	High
-4.93051e+18	FALSE	Medium	IsMasterProtein	TGGT1_313540-t26_1-p1	transcript=TGGT1_313540-t26_1 | gene=TGGT1_313540 | organism=Toxoplasma_gondii_GT1 | gene_product=hypothetical protein | transcript_product=hypothetical protein | location=TGGT1_chrXI:3428424-3432563(-) | protein_length=1274 | sequence_SO=chromosome | SO=protein_coding_gene | is_pseudo=false	0.024	1.575	1	1	1	1	1274	134.5	8.56	1.62	1																														High	High	High	High
-9.74122e+16	FALSE	Medium	IsMasterProtein	TGGT1_226560-t26_1-p1	transcript=TGGT1_226560-t26_1 | gene=TGGT1_226560 | organism=Toxoplasma_gondii_GT1 | gene_product=Zinc finger (CCCH type) motif-containing protein [Source:UniProtKB/TrEMBL;Acc:S7W5M6] | transcript_product=zinc finger (CCCH type) motif-containing protein | location=TGGT1_chrX:1444286-1446900(+) | protein_length=401 | sequence_SO=chromosome | SO=protein_coding_gene | is_pseudo=false	0.027	1.524	2	1	1	1	401	45.2	6.02	1.93	1																														High	High	High	High
-2.88196e+17	FALSE	High	IsMasterProtein	TGGT1_243490-t26_1-p1	transcript=TGGT1_243490-t26_1 | gene=TGGT1_243490 | organism=Toxoplasma_gondii_GT1 | gene_product=Putative BCS1 family isoform 9 [Source:UniProtKB/TrEMBL;Acc:S7VMQ8] | transcript_product=putative BCS1 family isoform 9 | location=TGGT1_chrVI:2588794-2597407(+) | protein_length=533 | sequence_SO=chromosome | SO=protein_coding_gene | is_pseudo=false	0.004	2.635	2	1	1	1	533	58.7	8.25	0	1	0.606	0.955	1.046	1.012	0.862	0.622	1.142	1.051	1.303	6.9	4.2	6.6	7.2	7	5.9	4.3	7.9	7.2	9	6.9	4.2	6.6	7.2	7	5.9	4.3	7.9	7.2	9	High	High	High	High
-2.23768e+18	FALSE	High	IsMasterProtein	TGGT1_306890-t26_1-p1	transcript=TGGT1_306890-t26_1 | gene=TGGT1_306890 | organism=Toxoplasma_gondii_GT1 | gene_product=hypothetical protein | transcript_product=hypothetical protein | location=TGGT1_chrXI:190868-195019(+) | protein_length=1383 | sequence_SO=chromosome | SO=protein_coding_gene | is_pseudo=false	0.004	2.528	1	1	1	1	1383	147.5	6.14	2.03	1	0.694	0.986	0.821	0.792	0.809	0.908	0.494	0.683	0.686	42.6	29.6	42	35	33.8	34.5	38.7	21.1	29.1	29.3	42.6	29.6	42	35	33.8	34.5	38.7	21.1	29.1	29.3	High	High	High	High
1.84316e+18	FALSE	High	IsMasterProtein	TGGT1_212310-t26_1-p1	transcript=TGGT1_212310-t26_1 | gene=TGGT1_212310 | organism=Toxoplasma_gondii_GT1 | gene_product=V-type proton ATPase proteolipid subunit [Source:UniProtKB/TrEMBL;Acc:S7WBL3] | transcript_product=vacuolar ATP synthetase | location=TGGT1_chrX:3830850-3833361(-) | protein_length=170 | sequence_SO=chromosome | SO=protein_coding_gene | is_pseudo=false	0	14.132	10	3	9	3	170	17.5	7.96	29.71	3	0.734	0.83	0.855	0.929	1.018	0.982	0.917	0.988	1.169	3262.3	2396.1	2707.9	2787.7	3031.8	3320.9	3202.6	2991.2	3222.1	3815.1	3262.3	2396.1	2707.9	2787.7	3031.8	3320.9	3202.6	2991.2	3222.1	3815.1	High	High	High	High
3.61477e+18	FALSE	High	IsMasterProtein	TGGT1_263740-t26_1-p1	transcript=TGGT1_263740-t26_1 | gene=TGGT1_263740 | organism=Toxoplasma_gondii_GT1 | gene_product=ABC transporter transmembrane region domain-containing protein [Source:UniProtKB/TrEMBL;Acc:S7WDN9] | transcript_product=ABC transporter transmembrane region domain-containing protein | location=TGGT1_chrVIIb:318578-328338(+) | protein_length=1005 | sequence_SO=chromosome | SO=protein_coding_gene | i…	0.001	5.745	2	1	1	1	1005	105.3	8.82	4.44	1	0.739	0.788	0.938	0.741	0.782	0.935	0.895	0.993	1.047	21.8	16.1	17.2	20.5	16.2	17.1	20.4	19.5	21.7	22.8	21.8	16.1	17.2	20.5	16.2	17.1	20.4	19.5	21.7	22.8	High	High	High	High
-4.96801e+18	FALSE	High	IsMasterProtein	TGGT1_216270-t26_1-p1	transcript=TGGT1_216270-t26_1 | gene=TGGT1_216270 | organism=Toxoplasma_gondii_GT1 | gene_product=Methyltranfer_dom domain-containing protein [Source:UniProtKB/TrEMBL;Acc:S7ULT8] | transcript_product=hypothetical protein | location=TGGT1_chrXI:6187356-6189468(+) | protein_length=279 | sequence_SO=chromosome | SO=protein_coding_gene | is_pseudo=false	0.007	2.372	5	1	1	1	279	30.3	5.39	2.61	1	0.76	0.943	0.86	0.969	0.75	0.883	0.973	0.684	0.809	57.2	43.4	53.9	49.2	55.4	42.9	50.5	55.6	39.1	46.2	57.2	43.4	53.9	49.2	55.4	42.9	50.5	55.6	39.1	46.2	High	High	High	High
-5.28652e+18	FALSE	High	IsMasterProtein	TGGT1_281990-t26_1-p1	transcript=TGGT1_281990-t26_1 | gene=TGGT1_281990 | organism=Toxoplasma_gondii_GT1 | gene_product=Isochorismatase domain-containing protein [Source:UniProtKB/TrEMBL;Acc:S7UW84] | transcript_product=Nicotinamidase | location=TGGT1_chrVIIa:4212345-4214588(+) | protein_length=589 | sequence_SO=chromosome | SO=protein_coding_gene | is_pseudo=false	0	23.073	8	4	5	4	589	63.6	5.24	20.27	4	0.783	1.006	0.817	0.795	0.815	0.816	0.794	0.786	0.782	1257.6	985	1265.4	1027.9	999.6	1024.5	1026.3	999	988	983	1257.6	985	1265.4	1027.9	999.6	1024.5	1026.3	999	988	983	High	High	High	High
-2.00306e+18	FALSE	High	IsMasterProtein	TGGT1_319640-t26_1-p1	transcript=TGGT1_319640-t26_1 | gene=TGGT1_319640 | organism=Toxoplasma_gondii_GT1 | gene_product=hypothetical protein | transcript_product=hypothetical protein | location=TGGT1_chrIV:758309-763358(+) | protein_length=915 | sequence_SO=chromosome | SO=protein_coding_gene | is_pseudo=false	0.004	2.589	1	1	1	1	915	101.5	6.09	2.74	1	0.785	1.039	0.957	0.8	0.936	0.881	0.772	0.769	0.83	146.5	115	152.1	140.1	117.1	137	129	113	112.6	121.6	146.5	115	152.1	140.1	117.1	137	129	113	112.6	121.6	High	High	High	High
-4.92141e+18	FALSE	High	IsMasterProtein	TGGT1_235150-t26_1-p1	transcript=TGGT1_235150-t26_1 | gene=TGGT1_235150 | organism=Toxoplasma_gondii_GT1 | gene_product=MFS domain-containing protein [Source:UniProtKB/TrEMBL;Acc:S7UW99] | transcript_product=transporter, major facilitator family protein | location=TGGT1_chrX:4537454-4539145(+) | protein_length=563 | sequence_SO=chromosome | SO=protein_coding_gene | is_pseudo=false	0	9.036	5	1	1	1	563	60.5	5.8	6.39	1	0.797	0.813	0.947	0.843	0.991	0.788	1.261	0.954	1.05	56.1	44.7	45.6	53.1	47.3	55.6	44.2	70.8	53.5	58.9	56.1	44.7	45.6	53.1	47.3	55.6	44.2	70.8	53.5	58.9	High	High	High	High
-4.4348e+18	FALSE	High	IsMasterProtein	TGGT1_210270-t26_1-p1	transcript=TGGT1_210270-t26_1 | gene=TGGT1_210270 | organism=Toxoplasma_gondii_GT1 | gene_product=hypothetical protein | transcript_product=hypothetical protein | location=TGGT1_chrIX:4700324-4707522(+) | protein_length=2051 | sequence_SO=chromosome | SO=protein_coding_gene | is_pseudo=false	0	11.436	1	1	1	1	2051	226.7	5.19	6.82	1	0.804	0.742	0.961	1.03	0.93	0.941	0.856	0.839	0.898	22.5	18.1	16.7	21.6	23.1	20.9	21.1	19.2	18.8	20.2	22.5	18.1	16.7	21.6	23.1	20.9	21.1	19.2	18.8	20.2	High	High	High	High
4.6563e+18	FALSE	High	IsMasterProtein	TGGT1_213067-t26_1-p1	transcript=TGGT1_213067-t26_1 | gene=TGGT1_213067 | organism=Toxoplasma_gondii_GT1 | gene_product=hypothetical protein | transcript_product=hypothetical protein | location=TGGT1_chrV:709637-710995(-) | protein_length=452 | sequence_SO=chromosome | SO=protein_coding_gene | is_pseudo=false	0.002	3.79	4	1	1	1	452	50.1	9.47	3.75	1	0.807	1.2	1.266	1.165	1.165	0.539	1.2	1.155	1.579	10.1	8.1	12.1	12.7	11.7	11.7	5.4	12.1	11.6	15.9	10.1	8.1	12.1	12.7	11.7	11.7	5.4	12.1	11.6	15.9	High	High	High	High
-4.78424e+18	FALSE	High	IsMasterProtein	TGGT1_320592-t26_1-p1	transcript=TGGT1_320592-t26_1 | gene=TGGT1_320592 | organism=Toxoplasma_gondii_GT1 | gene_product=hypothetical protein | transcript_product=hypothetical protein | location=TGGT1_chrIV:159159-176441(+) | protein_length=2072 | sequence_SO=chromosome | SO=protein_coding_gene | is_pseudo=false	0	6.342	1	1	1	1	2072	222.5	8.02	4.04	1	0.816	0.973	0.928	1.036	0.791	0.943	0.951	0.679	0.966	34	27.8	33.1	31.6	35.2	26.9	32.1	32.4	23.1	32.9	34	27.8	33.1	31.6	35.2	26.9	32.1	32.4	23.1	32.9	High	High	High	High
-5.59744e+18	FALSE	High	IsMasterProtein	TGGT1_202190-t26_1-p1	transcript=TGGT1_202190-t26_1 | gene=TGGT1_202190 | organism=Toxoplasma_gondii_GT1 | gene_product=Tub domain-containing protein [Source:UniProtKB/TrEMBL;Acc:S7UUG2] | transcript_product=hypothetical protein | location=TGGT1_chrVIIa:3433795-3441702(-) | protein_length=1024 | sequence_SO=chromosome | SO=protein_coding_gene | is_pseudo=false	0	8.663	2	1	1	1	1024	111.6	6.6	5.91	1	0.819	1.003	1.057	1.006	1.041	0.744	0.899	1.02	0.797	20.6	16.9	20.7	21.8	20.8	21.5	15.3	18.5	21.1	16.5	20.6	16.9	20.7	21.8	20.8	21.5	15.3	18.5	21.1	16.5	High	High	High	High
7.61596e+18	FALSE	Medium	IsMasterProtein	TGGT1_311040-t26_1-p1	transcript=TGGT1_311040-t26_1 | gene=TGGT1_311040 | organism=Toxoplasma_gondii_GT1 | gene_product=hypothetical protein | transcript_product=hypothetical protein | location=TGGT1_chrXI:1712492-1713547(+) | protein_length=351 | sequence_SO=chromosome | SO=protein_coding_gene | is_pseudo=false	0.015	1.779	2	1	1	1	351	38.1	6.54	2.2	1	0.819	0.929	0.858	0.764	0.78	0.863	0.642	0.781	0.757	376.7	308.6	349.8	323.1	287.7	293.9	325.3	242	294.4	285.1	376.7	308.6	349.8	323.1	287.7	293.9	325.3	242	294.4	285.1	High	High	High	High
-7.6853e+18	FALSE	High	IsMasterProtein	TGGT1_265270-t26_1-p1	transcript=TGGT1_265270-t26_1 | gene=TGGT1_265270 | organism=Toxoplasma_gondii_GT1 | gene_product=hypothetical protein | transcript_product=hypothetical protein | location=TGGT1_chrIX:1457924-1460201(-) | protein_length=354 | sequence_SO=chromosome | SO=protein_coding_gene | is_pseudo=false	0.001	4.202	7	3	3	3	354	38.4	7.47	6.5	3	0.822	1.045	0.928	0.951	1.074	0.939	1.03	0.966	0.938	45.6	37.5	47.7	42.3	43.4	49	42.8	47	44.1	42.8	45.6	37.5	47.7	42.3	43.4	49	42.8	47	44.1	42.8	High	High	High	High
-5.0524e+18	FALSE	High	IsMasterProtein	TGGT1_286740-t26_1-p1	transcript=TGGT1_286740-t26_1 | gene=TGGT1_286740 | organism=Toxoplasma_gondii_GT1 | gene_product=Microneme-like protein [Source:UniProtKB/TrEMBL;Acc:S7W387] | transcript_product=microneme-like protein | location=TGGT1_chrV:1554594-1556873(+) | protein_length=759 | sequence_SO=chromosome | SO=protein_coding_gene | is_pseudo=false	0	9.262	3	2	2	2	759	79.7	5.08	6.02	2	0.826	0.962	1.07	0.894	0.9	0.992	0.81	0.95	1.125	67.3	55.6	64.7	72	60.2	60.6	66.7	54.5	63.9	75.7	67.3	55.6	64.7	72	60.2	60.6	66.7	54.5	63.9	75.7	High	High	High	High
2.41818e+18	FALSE	Medium	IsMasterProtein	TGGT1_263340-t26_1-p1	transcript=TGGT1_263340-t26_1 | gene=TGGT1_263340 | organism=Toxoplasma_gondii_GT1 | gene_product=RNA methyltransferase, TrmH family protein [Source:UniProtKB/TrEMBL;Acc:S7WDJ8] | transcript_product=RNA methyltransferase, TrmH family protein | location=TGGT1_chrVIIb:590554-592170(-) | protein_length=538 | sequence_SO=chromosome | SO=protein_coding_gene | is_pseudo=false	0.015	1.837	3	1	1	1	538	57.9	6.39	2.34	1	0.828	1.021	1.613	0.761	1.194	1.5	1.359	1.351	1.231	10.3	8.6	10.6	16.7	7.9	12.3	15.5	14	14	12.7	10.3	8.6	10.6	16.7	7.9	12.3	15.5	14	14	12.7	High	High	High	High
-8.89503e+18	FALSE	High	IsMasterProtein	TGGT1_297520-t26_1-p1	transcript=TGGT1_297520-t26_1 | gene=TGGT1_297520 | organism=Toxoplasma_gondii_GT1 | gene_product=Proteophosphoglycan PPG1 [Source:UniProtKB/TrEMBL;Acc:S7UKZ6] | transcript_product=proteophosphoglycan PPG1 | location=TGGT1_chrII:1824333-1834988(-) | protein_length=1495 | sequence_SO=chromosome | SO=protein_coding_gene | is_pseudo=false	0	7.053	1	1	1	1	1495	160.6	7.74	4.38	1	0.832	0.816	0.695	0.973	0.994	0.949	1.193	0.966	0.945	26.2	21.8	21.4	18.2	25.5	26	24.9	31.3	25.3	24.8	26.2	21.8	21.4	18.2	25.5	26	24.9	31.3	25.3	24.8	High	High	High	High
-8.72437e+18	FALSE	Medium	IsMasterProtein	TGGT1_286230-t26_1-p1	transcript=TGGT1_286230-t26_1 | gene=TGGT1_286230 | organism=Toxoplasma_gondii_GT1 | gene_product=hypothetical protein | transcript_product=hypothetical protein | location=TGGT1_chrV:1753645-1764533(-) | protein_length=2622 | sequence_SO=chromosome | SO=protein_coding_gene | is_pseudo=false	0.024	1.551	0	1	1	1	2622	279.2	5.66	2.32	1	0.835	0.889	0.893	0.883	0.92	0.922	1.696	1.077	1.189	120.7	100.8	107.2	107.7	106.6	111.1	111.3	204.7	130	143.5	120.7	100.8	107.2	107.7	106.6	111.1	111.3	204.7	130	143.5	High	High	High	High
-3.45084e+18	FALSE	High	IsMasterProtein	TGGT1_287480-t26_1-p1	transcript=TGGT1_287480-t26_1 | gene=TGGT1_287480 | organism=Toxoplasma_gondii_GT1 | gene_product=hypothetical protein | transcript_product=hypothetical protein | location=TGGT1_chrV:410863-428566(+) | protein_length=4703 | sequence_SO=chromosome | SO=protein_coding_gene | is_pseudo=false	0	17.956	1	4	5	4	4703	502.4	6.48	15.06	4	0.842	1.189	0.806	0.855	0.686	0.645	0.773	0.68	0.709	259.9	218.9	309.2	209.5	222.1	178.3	167.7	201	176.8	184.2	259.9	218.9	309.2	209.5	222.1	178.3	167.7	201	176.8	184.2	High	High	High	High
2.34846e+18	FALSE	High	IsMasterProtein	TGGT1_275740-t26_1-p1	transcript=TGGT1_275740-t26_1 | gene=TGGT1_275740 | organism=Toxoplasma_gondii_GT1 | gene_product=hypothetical protein | transcript_product=hypothetical protein | location=TGGT1_chrIII:240424-247727(+) | protein_length=1362 | sequence_SO=chromosome | SO=protein_coding_gene | is_pseudo=false	0	9.175	2	2	4	1	1362	147.3	6.44	9.53	2	0.843	1.297	1.207	1.099	0.728	1.018	1.446	1.718	1.674	6.2	5.2	8.1	7.5	6.8	4.5	6.3	9	10.7	10.4	6.2	5.2	8.1	7.5	6.8	4.5	6.3	9	10.7	10.4	High	High	High	High
-1.01372e+16	FALSE	High	IsMasterProtein	TGGT1_253360-t26_1-p1	transcript=TGGT1_253360-t26_1 | gene=TGGT1_253360 | organism=Toxoplasma_gondii_GT1 | gene_product=t-SNARE coiled-coil homology domain-containing protein [Source:UniProtKB/TrEMBL;Acc:A0A125YRN5] | transcript_product=hypothetical protein | location=TGGT1_chrIII:852946-857015(-) | protein_length=391 | sequence_SO=chromosome | SO=protein_coding_gene | is_pseudo=false	0.001	4.95	3	1	2	1	391	43.6	6.58	5.39	1	0.851	0.767	0.823	0.86	0.89	0.973	0.902	0.824	0.835	365.8	311.3	280.6	301.1	314.8	325.7	356	330.1	301.3	305.4	365.8	311.3	280.6	301.1	314.8	325.7	356	330.1	301.3	305.4	High	High	High	High
7.30795e+18	FALSE	High	IsMasterProtein	TGGT1_202568-t26_1-p1	transcript=TGGT1_202568-t26_1 | gene=TGGT1_202568 | organism=Toxoplasma_gondii_GT1 | gene_product=hypothetical protein | transcript_product=hypothetical protein | location=TGGT1_chrVIIa:3117710-3119010(-) | protein_length=148 | sequence_SO=chromosome | SO=protein_coding_gene | is_pseudo=false	0	10.53	19	1	1	1	148	17.4	6.39	6.03	1	0.852	0.979	1.125	1.059	1.177	1.02	1.124	1.283	1.31	54.2	46.2	53	61	57.4	63.8	55.3	60.9	69.5	71	54.2	46.2	53	61	57.4	63.8	55.3	60.9	69.5	71	High	High	High	High
-8.29956e+18	FALSE	High	IsMasterProtein	TGGT1_299200-t26_1-p1	transcript=TGGT1_299200-t26_1 | gene=TGGT1_299200 | organism=Toxoplasma_gondii_GT1 | gene_product=Trafficking protein particle complex subunit [Source:UniProtKB/TrEMBL;Acc:A0A125YTG7] | transcript_product=putative Bet3 transport protein | location=TGGT1_chrIII:2102262-2105060(-) | protein_length=187 | sequence_SO=chromosome | SO=protein_coding_gene | is_pseudo=false	0.006	2.424	4	1	1	1	187	21.2	4.6	2.29	1	0.853	0.734	0.71	0.859	0.92	0.861	0.909	1.064	0.866	18.4	15.7	13.5	13.1	15.8	16.9	15.8	16.7	19.6	15.9	18.4	15.7	13.5	13.1	15.8	16.9	15.8	16.7	19.6	15.9	High	High	High	High
1.5161e+18	FALSE	High	IsMasterProtein	TGGT1_218590-t26_1-p1	transcript=TGGT1_218590-t26_1 | gene=TGGT1_218590 | organism=Toxoplasma_gondii_GT1 | gene_product=PPM-type phosphatase domain-containing protein [Source:UniProtKB/TrEMBL;Acc:S7WA48] | transcript_product=protein phosphatase 2C domain-containing protein | location=TGGT1_chrXII:1332729-1338512(-) | protein_length=901 | sequence_SO=chromosome | SO=protein_coding_gene | is_pseudo=false	0.007	2.318	2	1	1	1	901	97.6	9.22	2.08	1	0.856	0.974	1.15	1.31	1.252	1.077	1.528	1.48	1.324	26.5	22.7	25.8	30.5	34.7	33.2	28.5	40.5	39.2	35.1	26.5	22.7	25.8	30.5	34.7	33.2	28.5	40.5	39.2	35.1	High	High	High	High
-5.71993e+18	FALSE	High	IsMasterProtein	TGGT1_263520-t26_1-p1	transcript=TGGT1_263520-t26_1 | gene=TGGT1_263520 | organism=Toxoplasma_gondii_GT1 | gene_product=Microtubule associated protein SPM1 [Source:UniProtKB/TrEMBL;Acc:S7UXQ8] | transcript_product=microtubule associated protein SPM1 | location=TGGT1_chrVIIb:473105-475119(+) | protein_length=351 | sequence_SO=chromosome | SO=protein_coding_gene | is_pseudo=false	0	29.24	21	7	15	7	351	38.7	7.9	49.19	7	0.856	1.158	1.152	1.163	1.031	1.1	0.867	0.884	1.102	4769	4082.7	5520.3	5492.7	5547	4916.4	5247.9	4135.6	4213.7	5254.2	4769	4082.7	5520.3	5492.7	5547	4916.4	5247.9	4135.6	4213.7	5254.2	High	High	High	High
2.80889e+18	FALSE	Medium	IsMasterProtein	TGGT1_272383-t26_1-p1	transcript=TGGT1_272383-t26_1 | gene=TGGT1_272383 | organism=Toxoplasma_gondii_GT1 | gene_product=hypothetical protein | transcript_product=hypothetical protein | location=TGGT1_chrVIII:4012805-4017508(+) | protein_length=431 | sequence_SO=chromosome | SO=protein_coding_gene | is_pseudo=false	0.024	1.569	2	1	1	1	431	45.6	6.27	2.33	1	0.859	0.914	0.729	0.916	0.864	0.867	0.957	0.873	1.01	69	59.3	63.1	50.3	63.2	59.6	59.9	66.1	60.2	69.7	69	59.3	63.1	50.3	63.2	59.6	59.9	66.1	60.2	69.7	High	High	High	High
1.76376e+18	FALSE	High	IsMasterProtein	TGGT1_293200-t26_1-p1	transcript=TGGT1_293200-t26_1 | gene=TGGT1_293200 | organism=Toxoplasma_gondii_GT1 | gene_product=hypothetical protein | transcript_product=hypothetical protein | location=TGGT1_chrIa:144300-147612(+) | protein_length=112 | sequence_SO=chromosome | SO=protein_coding_gene | is_pseudo=false	0.002	4.056	15	1	1	1	112	12.1	9.28	2.98	1	0.861	1.042	0.751	0.932	0.922	0.909	0.939	0.972	0.999	23.7	20.4	24.7	17.8	22.1	21.9	21.5	22.3	23	23.7	23.7	20.4	24.7	17.8	22.1	21.9	21.5	22.3	23	23.7	High	High	High	High
7.52448e+18	FALSE	Low	IsMasterProtein	TGGT1_295690-t26_1-p1	transcript=TGGT1_295690-t26_1 | gene=TGGT1_295690 | organism=Toxoplasma_gondii_GT1 | gene_product=2-methoxy-6-polyprenyl-1,4-benzoquinol methylase, mitochondrial [Source:UniProtKB/TrEMBL;Acc:A0A125YN53] | transcript_product=ubiquinone/menaquinone biosynthesis methyltransferase subfamily protein | location=TGGT1_chrIa:1591963-1593588(-) | protein_length=541 | sequence_SO=chromosome | SO=protein_co…	0.056	1.145	1	1	1	1	541	59	9.06	1.75	1	0.862	0.92	0.967	0.987	0.926	1	0.643	0.873	0.599	113	97.4	104	109.3	111.6	104.6	113	72.7	98.6	67.7	113	97.4	104	109.3	111.6	104.6	113	72.7	98.6	67.7	High	High	High	High
-6.08705e+18	FALSE	High	IsMasterProtein	TGGT1_231380-t26_1-p1	transcript=TGGT1_231380-t26_1 | gene=TGGT1_231380 | organism=Toxoplasma_gondii_GT1 | gene_product=RPOL4c domain-containing protein [Source:UniProtKB/TrEMBL;Acc:S7WAZ8] | transcript_product=DNA-directed RNA polymerase II RPB4 | location=TGGT1_chrVIII:1384344-1386156(+) | protein_length=130 | sequence_SO=chromosome | SO=protein_coding_gene | is_pseudo=false	0	17.381	14	1	2	1	130	14.9	8.94	10.19	1	0.863	0.925	1.042	0.953	0.971	0.948	0.837	0.941	1.348	394.2	340	364.5	410.8	375.6	382.8	373.9	329.9	370.9	531.4	394.2	340	364.5	410.8	375.6	382.8	373.9	329.9	370.9	531.4	High	High	High	High
-6.03846e+17	FALSE	High	IsMasterProtein	TGGT1_241010-t26_1-p1	transcript=TGGT1_241010-t26_1 | gene=TGGT1_241010 | organism=Toxoplasma_gondii_GT1 | gene_product=BTB domain-containing protein [Source:UniProtKB/TrEMBL;Acc:S7W6V8] | transcript_product=K+ channel tetramerisation domain-containing protein | location=TGGT1_chrVI:1592344-1594134(+) | protein_length=336 | sequence_SO=chromosome | SO=protein_coding_gene | is_pseudo=false	0	6.774	4	1	1	1	336	35.8	5.64	3.92	1	0.865	1.015	1.035	1.059	1.173	1.027	1.081	1.027	1.063	101.7	88	103.2	105.3	107.7	119.3	104.4	109.9	104.4	108.1	101.7	88	103.2	105.3	107.7	119.3	104.4	109.9	104.4	108.1	High	High	High	High
7.1106e+18	FALSE	High	IsMasterProtein	TGGT1_204490-t26_1-p1	transcript=TGGT1_204490-t26_1 | gene=TGGT1_204490 | organism=Toxoplasma_gondii_GT1 | gene_product=hypothetical protein | transcript_product=hypothetical protein | location=TGGT1_chrVIIa:1651032-1653481(-) | protein_length=272 | sequence_SO=chromosome | SO=protein_coding_gene | is_pseudo=false	0	18.91	10	2	4	2	272	31.4	10.1	16.05	2	0.867	0.896	0.971	0.96	0.97	0.951	0.872	0.838	0.126	369.7	320.7	331.1	358.9	355	358.7	351.6	322.5	309.7	46.6	369.7	320.7	331.1	358.9	355	358.7	351.6	322.5	309.7	46.6	High	High	High	High
-2.82383e+18	FALSE	High	IsMasterProtein	TGGT1_225470-t26_1-p1	transcript=TGGT1_225470-t26_1 | gene=TGGT1_225470 | organism=Toxoplasma_gondii_GT1 | gene_product=PMSR domain-containing protein [Source:UniProtKB/TrEMBL;Acc:A0A125YIM6] | transcript_product=peptide methionine sulfoxide reductase | location=TGGT1_chrX:2131925-2133032(+) | protein_length=269 | sequence_SO=chromosome | SO=protein_coding_gene | is_pseudo=false	0	7.814	7	2	2	2	269	30.4	8.75	6.54	2	0.87	0.952	0.868	0.827	0.8	0.777	0.912	0.819	0.839	946.5	823.7	900.9	821.9	782.6	757.4	735.2	863	774.8	794.3	946.5	823.7	900.9	821.9	782.6	757.4	735.2	863	774.8	794.3	High	High	High	High
-5.15559e+18	FALSE	High	IsMasterProtein	TGGT1_309390-t26_1-p1	transcript=TGGT1_309390-t26_1 | gene=TGGT1_309390 | organism=Toxoplasma_gondii_GT1 | gene_product=hypothetical protein | transcript_product=hypothetical protein | location=TGGT1_chrXI:623150-625134(+) | protein_length=493 | sequence_SO=chromosome | SO=protein_coding_gene | is_pseudo=false	0	6.65	5	2	2	2	493	54.2	8.44	6.07	2	0.876	0.626	0.955	0.965	1.03	1.21	1.103	0.779	0.811	293.7	257.3	184	280.6	283.3	302.4	355.5	324.1	228.7	238.2	293.7	257.3	184	280.6	283.3	302.4	355.5	324.1	228.7	238.2	High	High	High	High
5.33141e+18	FALSE	High	IsMasterProtein	TGGT1_248260-t26_1-p1	transcript=TGGT1_248260-t26_1 | gene=TGGT1_248260 | organism=Toxoplasma_gondii_GT1 | gene_product=hypothetical protein | transcript_product=hypothetical protein | location=TGGT1_chrXII:3698912-3699508(+) | protein_length=198 | sequence_SO=chromosome | SO=protein_coding_gene | is_pseudo=false	0	7.102	15	2	2	2	198	21.2	11.25	6.16	2	0.876	0.835	1.018	1.034	1.031	1.171	1.117	0.93	0.963	1095.4	959.8	914.7	1115	1133	1129.9	1282.6	1223.4	1018.9	1054.8	1095.4	959.8	914.7	1115	1133	1129.9	1282.6	1223.4	1018.9	1054.8	High	High	High	High
5.38915e+18	FALSE	High	IsMasterProtein	TGGT1_268430-t26_1-p1	transcript=TGGT1_268430-t26_1 | gene=TGGT1_268430 | organism=Toxoplasma_gondii_GT1 | gene_product=hypothetical protein | transcript_product=hypothetical protein | location=TGGT1_chrVIII:6448098-6451578(+) | protein_length=997 | sequence_SO=chromosome | SO=protein_coding_gene | is_pseudo=false	0	7.307	2	1	1	1	997	107.8	5.44	5.72	1	0.878	0.951	0.925	1.016	0.967	0.993	0.942	0.812	0.952	131.7	115.6	125.2	121.8	133.7	127.3	130.7	124	106.9	125.3	131.7	115.6	125.2	121.8	133.7	127.3	130.7	124	106.9	125.3	High	High	High	High
1.36632e+18	FALSE	Medium	IsMasterProtein	TGGT1_213690-t26_1-p1	transcript=TGGT1_213690-t26_1 | gene=TGGT1_213690 | organism=Toxoplasma_gondii_GT1 | gene_product=RING-type domain-containing protein [Source:UniProtKB/TrEMBL;Acc:S7UPA4] | transcript_product=ring box protein 1 family protein | location=TGGT1_chrV:1109257-1110407(+) | protein_length=127 | sequence_SO=chromosome | SO=protein_coding_gene | is_pseudo=false	0.015	1.771	11	1	1	1	127	13.8	5.43	0	1	0.879	1.024	1.004	0.904	1.084	0.982	1.109	1.015	1.177	34.2	30	35	34.3	30.9	37	33.6	37.9	34.7	40.2	34.2	30	35	34.3	30.9	37	33.6	37.9	34.7	40.2	High	High	High	High
4.17537e+18	FALSE	High	IsMasterProtein	TGGT1_298020-t26_1-p1	transcript=TGGT1_298020-t26_1 | gene=TGGT1_298020 | organism=Toxoplasma_gondii_GT1 | gene_product=DEAD-family helicase [Source:UniProtKB/TrEMBL;Acc:S7VTJ1] | transcript_product=DEAD-family helicase | location=TGGT1_chrII:2173899-2186012(+) | protein_length=1158 | sequence_SO=chromosome | SO=protein_coding_gene | is_pseudo=false	0	10.435	3	2	3	2	1158	130.9	8.13	9.62	2	0.88	0.943	0.945	0.993	0.974	1.032	0.945	0.923	0.912	469.8	413.4	443.1	444	466.5	457.6	484.7	444.2	433.4	428.4	469.8	413.4	443.1	444	466.5	457.6	484.7	444.2	433.4	428.4	High	High	High	High
3.71194e+18	FALSE	Medium	IsMasterProtein	TGGT1_230070-t26_1-p1	transcript=TGGT1_230070-t26_1 | gene=TGGT1_230070 | organism=Toxoplasma_gondii_GT1 | gene_product=BolA family protein [Source:UniProtKB/TrEMBL;Acc:S7WBE0] | transcript_product=BolA family protein | location=TGGT1_chrVIII:570537-570812(-) | protein_length=91 | sequence_SO=chromosome | SO=protein_coding_gene | is_pseudo=false	0.027	1.529	9	1	1	1	91	10	7.3	2.2	1	0.881	0.895	1.011	1.08	0.981	1.157	0.798	0.959	1.108	227.4	200.4	203.5	229.9	245.6	223.1	263.1	181.4	218.1	251.9	227.4	200.4	203.5	229.9	245.6	223.1	263.1	181.4	218.1	251.9	High	High	High	High
9.21349e+18	FALSE	High	IsMasterProtein	TGGT1_234980-t26_1-p1	transcript=TGGT1_234980-t26_1 | gene=TGGT1_234980 | organism=Toxoplasma_gondii_GT1 | gene_product=hypothetical protein | transcript_product=hypothetical protein | location=TGGT1_chrX:4475059-4477709(-) | protein_length=760 | sequence_SO=chromosome | SO=protein_coding_gene | is_pseudo=false	0	9.279	2	1	1	1	760	81.2	7.36	4.82	1	0.882	0.875	0.887	0.87	0.926	1.053	0.989	0.89	0.911	102.3	90.2	89.5	90.8	89	94.7	107.7	101.2	91.1	93.2	102.3	90.2	89.5	90.8	89	94.7	107.7	101.2	91.1	93.2	High	High	High	High
4.60389e+18	FALSE	High	IsMasterProtein	TGGT1_218000-t26_1-p1	transcript=TGGT1_218000-t26_1 | gene=TGGT1_218000 | organism=Toxoplasma_gondii_GT1 | gene_product=hypothetical protein | transcript_product=hypothetical protein | location=TGGT1_chrXII:1679464-1693828(-) | protein_length=3282 | sequence_SO=chromosome | SO=protein_coding_gene | is_pseudo=false	0.004	2.544	0	1	1	1	3282	352.1	7.96	2.02	1	0.884	0.976	1.132	1.048	0.96	1.087	1.169	1.163	0.94	68	60.2	66.4	77	71.3	65.3	74	79.6	79.1	64	68	60.2	66.4	77	71.3	65.3	74	79.6	79.1	64	High	High	High	High
-7.46556e+18	FALSE	High	IsMasterProtein	TGGT1_291120-t26_1-p1	transcript=TGGT1_291120-t26_1 | gene=TGGT1_291120 | organism=Toxoplasma_gondii_GT1 | gene_product=Trafficking protein mon1 subfamily protein [Source:UniProtKB/TrEMBL;Acc:S7W4I0] | transcript_product=trafficking protein mon1 subfamily protein | location=TGGT1_chrIX:3938096-3949369(+) | protein_length=1086 | sequence_SO=chromosome | SO=protein_coding_gene | is_pseudo=false	0	7.265	2	1	1	1	1086	116.4	5.41	3.89	1	0.885	0.957	0.901	0.893	0.942	0.57	0.917	0.983	1.021	38.1	33.7	36.5	34.4	34.1	35.9	21.8	35	37.5	38.9	38.1	33.7	36.5	34.4	34.1	35.9	21.8	35	37.5	38.9	High	High	High	High
6.00803e+18	FALSE	High	IsMasterProtein	TGGT1_235130-t26_1-p1	transcript=TGGT1_235130-t26_1 | gene=TGGT1_235130 | organism=Toxoplasma_gondii_GT1 | gene_product=Transmembrane protein [Source:UniProtKB/TrEMBL;Acc:A0A125YYR0] | transcript_product=transmembrane protein | location=TGGT1_chrX:4523427-4527219(+) | protein_length=487 | sequence_SO=chromosome | SO=protein_coding_gene | is_pseudo=false	0.001	5.433	4	2	2	2	487	55.1	8.29	5.53	2	0.887	0.794	0.805	1.164	1.357	0.966	1.065	1.002	0.982	8.2	7.3	6.6	6.6	9.6	11.2	8	8.8	8.3	8.1	8.2	7.3	6.6	6.6	9.6	11.2	8	8.8	8.3	8.1	High	High	High	High
-5.99924e+18	FALSE	High	IsMasterProtein	TGGT1_315780-t26_1-p1	transcript=TGGT1_315780-t26_1 | gene=TGGT1_315780 | organism=Toxoplasma_gondii_GT1 | gene_product=Putative myosin regulatory light chain [Source:UniProtKB/TrEMBL;Acc:A0A125YT28] | transcript_product=putative myosin regulatory light chain | location=TGGT1_chrXI:4923626-4926382(+) | protein_length=206 | sequence_SO=chromosome | SO=protein_coding_gene | is_pseudo=false	0	44.877	44	8	19	8	206	23.1	7.49	73.53	8	0.893	1.103	1.055	1.022	1.098	1.113	0.913	0.976	1.124	4089.6	3650.9	4509.3	4312.5	4180.7	4491.3	4551.5	3732.4	3992.9	4594.8	4089.6	3650.9	4509.3	4312.5	4180.7	4491.3	4551.5	3732.4	3992.9	4594.8	High	High	High	High
-1.6879e+18	FALSE	High	IsMasterProtein	TGGT1_305760-t26_1-p1	transcript=TGGT1_305760-t26_1 | gene=TGGT1_305760 | organism=Toxoplasma_gondii_GT1 | gene_product=SP-RING-type domain-containing protein [Source:UniProtKB/TrEMBL;Acc:S7VQI5] | transcript_product=hypothetical protein | location=TGGT1_chrIX:5333566-5337379(-) | protein_length=334 | sequence_SO=chromosome | SO=protein_coding_gene | is_pseudo=false	0	8.468	6	1	1	1	334	37.2	4.94	4.3	1	0.894	0.902	0.699	1.164	1.013	1.007	0.997	1.008	1.2	30.6	27.4	27.6	21.4	35.7	31	30.8	30.5	30.9	36.7	30.6	27.4	27.6	21.4	35.7	31	30.8	30.5	30.9	36.7	High	High	High	High
-1.66203e+18	FALSE	High	IsMasterProtein	TGGT1_269442-t26_1-p1	transcript=TGGT1_269442-t26_1 | gene=TGGT1_269442 | organism=Toxoplasma_gondii_GT1 | gene_product=Putative calmodulin [Source:UniProtKB/TrEMBL;Acc:S7V4T6] | transcript_product=putative calmodulin | location=TGGT1_chrVIII:5794616-5795668(-) | protein_length=87 | sequence_SO=chromosome | SO=protein_coding_gene | is_pseudo=false	0	22.001	33	3	20	3	87	9.8	4.72	75.2	3	0.9	0.849	0.947	0.916	0.936	0.957	0.585	0.887	0.978	12428.2	11181	10547.4	11771.6	11384.9	11627.3	11895.6	7270	11024.4	12151.4	12428.2	11181	10547.4	11771.6	11384.9	11627.3	11895.6	7270	11024.4	12151.4	High	High	High	High
8.37988e+18	FALSE	High	IsMasterProtein	TGGT1_231980-t26_1-p1	transcript=TGGT1_231980-t26_1 | gene=TGGT1_231980 | organism=Toxoplasma_gondii_GT1 | gene_product=hypothetical protein | transcript_product=hypothetical protein | location=TGGT1_chrVIII:1695076-1703809(-) | protein_length=1692 | sequence_SO=chromosome | SO=protein_coding_gene | is_pseudo=false	0	8.235	2	2	3	2	1692	184.3	7.44	8.77	2	0.9	1.033	0.987	1.013	0.875	1.084	0.906	0.941	0.786	82.9	74.6	85.7	81.9	84	72.6	89.9	75.1	78.1	65.2	82.9	74.6	85.7	81.9	84	72.6	89.9	75.1	78.1	65.2	High	High	High	High
6.33524e+18	FALSE	High	IsMasterProtein	TGGT1_212850-t26_1-p1	transcript=TGGT1_212850-t26_1 | gene=TGGT1_212850 | organism=Toxoplasma_gondii_GT1 | gene_product=PI31_Prot_C domain-containing protein [Source:UniProtKB/TrEMBL;Acc:S7UPF2] | transcript_product=hypothetical protein | location=TGGT1_chrV:515723-519063(+) | protein_length=456 | sequence_SO=chromosome | SO=protein_coding_gene | is_pseudo=false	0	13.882	5	2	6	2	456	48.2	5.71	24.73	2	0.901	0.81	0.975	1.04	0.898	1.046	0.958	0.997	1.197	377.2	340	305.4	367.8	392.2	338.8	394.6	361.5	376	451.6	377.2	340	305.4	367.8	392.2	338.8	394.6	361.5	376	451.6	High	High	High	High
-2.31095e+18	FALSE	High	IsMasterProtein	TGGT1_249950-t26_1-p1	transcript=TGGT1_249950-t26_1 | gene=TGGT1_249950 | organism=Toxoplasma_gondii_GT1 | gene_product=Protein MAK16 homolog [Source:UniProtKB/TrEMBL;Acc:S7WGB9] | transcript_product=Mak16 protein | location=TGGT1_chrXII:4889188-4892763(-) | protein_length=333 | sequence_SO=chromosome | SO=protein_coding_gene | is_pseudo=false	0	14.793	5	1	1	1	333	38.7	5.41	6.34	1	0.903	1.207	1.116	1.054	0.997	1.051	0.959	0.894	0.696	248.6	224.4	300	277.3	262.1	248	261.2	238.5	222.1	172.9	248.6	224.4	300	277.3	262.1	248	261.2	238.5	222.1	172.9	High	High	High	High
-6.81871e+18	FALSE	High	IsMasterProtein	TGGT1_259200A-t26_1-p1	transcript=TGGT1_259200A-t26_1 | gene=TGGT1_259200A | organism=Toxoplasma_gondii_GT1 | gene_product=Na_H_Exchanger domain-containing protein [Source:UniProtKB/TrEMBL;Acc:S7UZ33] | transcript_product=Na+/H+ exchanger NHE1 | location=TGGT1_chrVIIb:2850485-2855582(-) | protein_length=847 | sequence_SO=chromosome | SO=protein_coding_gene | is_pseudo=false	0	12.84	4	2	2	2	847	92.1	6.74	6.89	2	0.903	0.831	0.91	1.158	0.964	0.962	1.22	1.071	0.949	72.1	65.1	59.9	65.6	83.5	69.5	69.3	88	77.2	68.4	72.1	65.1	59.9	65.6	83.5	69.5	69.3	88	77.2	68.4	High	High	High	High
-6.56332e+18	FALSE	High	IsMasterProtein	TGGT1_243580-t26_1-p1	transcript=TGGT1_243580-t26_1 | gene=TGGT1_243580 | organism=Toxoplasma_gondii_GT1 | gene_product=HIT domain-containing protein [Source:UniProtKB/TrEMBL;Acc:A0A125YTN5] | transcript_product=putative Hit family protein involved in cell-cycle regulation | location=TGGT1_chrVI:2645473-2647229(+) | protein_length=276 | sequence_SO=chromosome | SO=protein_coding_gene | is_pseudo=false	0	61.121	35	6	24	6	276	30.5	9.58	101.49	6	0.905	0.998	1.017	0.973	1.066	1.066	0.896	0.956	0.983	4751.4	4300.6	4744.3	4833.6	4624	5062.7	5066.8	4258.1	4540.8	4669.5	4751.4	4300.6	4744.3	4833.6	4624	5062.7	5066.8	4258.1	4540.8	4669.5	High	High	High	High
-6.0352e+18	FALSE	High	IsMasterProtein	TGGT1_274100-t26_1-p1	transcript=TGGT1_274100-t26_1 | gene=TGGT1_274100 | organism=Toxoplasma_gondii_GT1 | gene_product=hypothetical protein | transcript_product=hypothetical protein | location=TGGT1_chrVIII:3026268-3028549(-) | protein_length=511 | sequence_SO=chromosome | SO=protein_coding_gene | is_pseudo=false	0	9.741	4	1	1	1	511	56.7	9.35	4.98	1	0.906	0.828	1.054	0.98	0.91	0.939	1.046	0.988	0.971	82.2	74.5	68.1	86.7	80.6	74.8	77.2	86	81.2	79.8	82.2	74.5	68.1	86.7	80.6	74.8	77.2	86	81.2	79.8	High	High	High	High
-4.83969e+18	FALSE	High	IsMasterProtein	TGGT1_226040-t26_1-p1	transcript=TGGT1_226040-t26_1 | gene=TGGT1_226040 | organism=Toxoplasma_gondii_GT1 | gene_product=EF hand domain-containing protein [Source:UniProtKB/TrEMBL;Acc:A0A125YWI4] | transcript_product=EF hand domain-containing protein | location=TGGT1_chrX:1759538-1760047(+) | protein_length=169 | sequence_SO=chromosome | SO=protein_coding_gene | is_pseudo=false	0.001	5.099	8	1	1	1	169	19	5.05	3.3	1	0.906	0.862	0.852	0.911	0.887	0.955	0.704	0.66	0.708	32.2	29.1	27.7	27.4	29.3	28.5	30.7	22.7	21.2	22.8	32.2	29.1	27.7	27.4	29.3	28.5	30.7	22.7	21.2	22.8	High	High	High	High
-3.86587e+18	FALSE	High	IsMasterProtein	TGGT1_313380-t26_1-p1	transcript=TGGT1_313380-t26_1 | gene=TGGT1_313380 | organism=Toxoplasma_gondii_GT1 | gene_product=hypothetical protein | transcript_product=hypothetical protein | location=TGGT1_chrXI:3292372-3294103(+) | protein_length=274 | sequence_SO=chromosome | SO=protein_coding_gene | is_pseudo=false	0	83.587	43	12	38	12	274	31.5	5.58	137.92	12	0.907	1.117	1.183	1.188	1.066	1.142	1.061	0.922	1.014	12383.6	11229.3	13836.1	14653.6	14717.5	13198.1	14147.5	13134.3	11423.5	12559.5	12383.6	11229.3	13836.1	14653.6	14717.5	13198.1	14147.5	13134.3	11423.5	12559.5	High	High	High	High
6.98958e+18	FALSE	High	IsMasterProtein	TGGT1_214930-t26_1-p1	transcript=TGGT1_214930-t26_1 | gene=TGGT1_214930 | organism=Toxoplasma_gondii_GT1 | gene_product=hypothetical protein | transcript_product=hypothetical protein | location=TGGT1_chrX:6492717-6493133(-) | protein_length=138 | sequence_SO=chromosome | SO=protein_coding_gene | is_pseudo=false	0	9.118	20	3	5	3	138	15.1	7.28	15.39	3	0.907	0.925	0.944	0.856	0.877	0.822	0.542	0.828	0.848	2929.8	2658.3	2708.6	2765.9	2506.8	2569.2	2407.3	1588.9	2426.2	2485	2929.8	2658.3	2708.6	2765.9	2506.8	2569.2	2407.3	1588.9	2426.2	2485	High	High	High	High
-1.74559e+17	FALSE	High	IsMasterProtein	TGGT1_239320-t26_1-p1	transcript=TGGT1_239320-t26_1 | gene=TGGT1_239320 | organism=Toxoplasma_gondii_GT1 | gene_product=BolA family protein [Source:UniProtKB/TrEMBL;Acc:S7UR55] | transcript_product=BolA family protein | location=TGGT1_chrVI:540807-543071(-) | protein_length=286 | sequence_SO=chromosome | SO=protein_coding_gene | is_pseudo=false	0	7.553	6	1	1	1	286	31	9.57	4.07	1	0.908	0.925	0.948	1.01	1.009	1.021	0.925	0.916	1.014	96.9	88	89.7	91.8	97.9	97.8	99	89.6	88.8	98.3	96.9	88	89.7	91.8	97.9	97.8	99	89.6	88.8	98.3	High	High	High	High
-3.99329e+18	FALSE	High	IsMasterProtein	TGGT1_310600-t26_1-p1	transcript=TGGT1_310600-t26_1 | gene=TGGT1_310600 | organism=Toxoplasma_gondii_GT1 | gene_product=Heat shock factor binding protein 1 protein [Source:UniProtKB/TrEMBL;Acc:S7UTD3] | transcript_product=heat shock factor binding protein 1 protein | location=TGGT1_chrXI:1431866-1433068(+) | protein_length=188 | sequence_SO=chromosome | SO=protein_coding_gene | is_pseudo=false	0	9.908	11	1	1	1	188	18.7	4.7	6.08	1	0.908	0.931	1	1.14	1.038	0.938	1.095	0.995	1.138	53.7	48.7	50	53.6	61.2	55.7	50.4	58.8	53.4	61.1	53.7	48.7	50	53.6	61.2	55.7	50.4	58.8	53.4	61.1	High	High	High	High
6.42078e+18	FALSE	High	IsMasterProtein	TGGT1_315570-t26_1-p1	transcript=TGGT1_315570-t26_1 | gene=TGGT1_315570 | organism=Toxoplasma_gondii_GT1 | gene_product=hypothetical protein | transcript_product=hypothetical protein | location=TGGT1_chrXI:4757280-4758139(+) | protein_length=91 | sequence_SO=chromosome | SO=protein_coding_gene | is_pseudo=false	0	8.679	22	2	7	2	91	9.3	11.68	16.9	2	0.91	0.95	0.912	0.874	0.856	0.897	0.846	0.802	0.597	3290.8	2994.2	3127.5	3000.9	2877.7	2815.5	2950.5	2783.3	2638.9	1965.3	3290.8	2994.2	3127.5	3000.9	2877.7	2815.5	2950.5	2783.3	2638.9	1965.3	High	High	High	High
-8.91886e+18	FALSE	Low	IsMasterProtein	TGGT1_222240-t26_1-p1	transcript=TGGT1_222240-t26_1 | gene=TGGT1_222240 | organism=Toxoplasma_gondii_GT1 | gene_product=hypothetical protein | transcript_product=hypothetical protein | location=TGGT1_chrII:970146-973217(+) | protein_length=1023 | sequence_SO=chromosome | SO=protein_coding_gene | is_pseudo=false	0.053	1.184	1	1	1	1	1023	107.8	5.76	0	1	0.911	0.742	0.952	1.063	1.02	1.227	0.828	0.863	0.933	256.1	233.2	190	243.8	272.1	261.1	314.2	212.1	221.1	238.9	256.1	233.2	190	243.8	272.1	261.1	314.2	212.1	221.1	238.9	High	High	High	High
5.79495e+18	FALSE	High	IsMasterProtein	TGGT1_270310-t26_1-p1	transcript=TGGT1_270310-t26_1 | gene=TGGT1_270310 | organism=Toxoplasma_gondii_GT1 | gene_product=Carrier domain-containing protein [Source:UniProtKB/TrEMBL;Acc:S7WD68] | transcript_product=hypothetical protein | location=TGGT1_chrVIII:5282975-5284826(-) | protein_length=241 | sequence_SO=chromosome | SO=protein_coding_gene | is_pseudo=false	0	6.639	5	1	2	1	241	26.6	5.57	7.82	1	0.911	1.019	1.091	1.035	1.12	1.094	1.051	1.049	1.079	1068.9	974.1	1089.2	1166.6	1106.7	1197.2	1169.1	1123.3	1121.3	1153.2	1068.9	974.1	1089.2	1166.6	1106.7	1197.2	1169.1	1123.3	1121.3	1153.2	High	High	High	High
1.93587e+18	FALSE	High	IsMasterProtein	TGGT1_219430-t26_1-p1	transcript=TGGT1_219430-t26_1 | gene=TGGT1_219430 | organism=Toxoplasma_gondii_GT1 | gene_product=AA_TRNA_LIGASE_II domain-containing protein [Source:UniProtKB/TrEMBL;Acc:S7WHW0] | transcript_product=tRNA ligase class II core domain (G, H, P, S and T) domain-containing protein | location=TGGT1_chrXII:890626-897747(+) | protein_length=1203 | sequence_SO=chromosome | SO=protein_coding_gene | is_pse…	0.003	2.967	1	1	1	1	1203	131.5	9.47	2.39	1	0.913	0.979	1.008	1.093	1.013	1.176	1.054	1.026	0.871	146	133.2	142.8	147.2	159.5	147.8	171.6	153.9	149.8	127.2	146	133.2	142.8	147.2	159.5	147.8	171.6	153.9	149.8	127.2	High	High	High	High
8.32854e+18	FALSE	Medium	IsMasterProtein	TGGT1_260150-t26_1-p1	transcript=TGGT1_260150-t26_1 | gene=TGGT1_260150 | organism=Toxoplasma_gondii_GT1 | gene_product=TPR_REGION domain-containing protein [Source:UniProtKB/TrEMBL;Acc:S7UY88] | transcript_product=tetratricopeptide repeat-containing protein | location=TGGT1_chrVIIb:2469236-2479231(-) | protein_length=3293 | sequence_SO=chromosome | SO=protein_coding_gene | is_pseudo=false	0.027	1.528	0	1	1	1	3293	349.2	8.28	3.14	1	0.913	1.051	1.08	1.108	0.892	0.968	0.897	0.981	1.093	81.4	74.4	85.6	87.9	90.2	72.6	78.8	73	79.9	89	81.4	74.4	85.6	87.9	90.2	72.6	78.8	73	79.9	89	High	High	High	High
-9.22131e+17	FALSE	Low	IsMasterProtein	TGGT1_242600-t26_1-p1	transcript=TGGT1_242600-t26_1 | gene=TGGT1_242600 | organism=Toxoplasma_gondii_GT1 | gene_product=6-phosphogluconate dehydrogenase, decarboxylating [Source:UniProtKB/TrEMBL;Acc:S7USE3] | transcript_product=6-phosphogluconate dehydrogenase | location=TGGT1_chrVI:2005915-2008474(-) | protein_length=506 | sequence_SO=chromosome | SO=protein_coding_gene | is_pseudo=false	0.054	1.173	1	1	1	1	506	55.6	6.7	2.42	1	0.913	0.991	0.972	0.989	1.066	1.067	0.867	1.029	1.06	665.4	607.8	659.4	646.5	657.9	709.2	710	577.2	685.1	705.1	665.4	607.8	659.4	646.5	657.9	709.2	710	577.2	685.1	705.1	High	High	High	High
-2.75545e+18	FALSE	Medium	IsMasterProtein	TGGT1_257180-t26_1-p1	transcript=TGGT1_257180-t26_1 | gene=TGGT1_257180 | organism=Toxoplasma_gondii_GT1 | gene_product=AAA_23 domain-containing protein [Source:UniProtKB/TrEMBL;Acc:S7WF28] | transcript_product=RecF/RecN/SMC N terminal domain-containing protein | location=TGGT1_chrVIIb:4089474-4106651(-) | protein_length=1588 | sequence_SO=chromosome | SO=protein_coding_gene | is_pseudo=false	0.014	1.866	0	1	1	1	1588	181.2	6.7	2.11	1	0.913	1.1	0.972	1.215	1.269	1.42	2.756	1.574	2.455	461.9	421.8	508.1	449	561.3	585.9	655.9	1273	726.9	1133.7	461.9	421.8	508.1	449	561.3	585.9	655.9	1273	726.9	1133.7	High	High	High	High
6.47684e+18	FALSE	High	IsMasterProtein	TGGT1_233710-t26_1-p1	transcript=TGGT1_233710-t26_1 | gene=TGGT1_233710 | organism=Toxoplasma_gondii_GT1 | gene_product=Inorganic anion transporter, sulfate permease (SulP) family protein [Source:UniProtKB/TrEMBL;Acc:S7V3U4] | transcript_product=inorganic anion transporter, sulfate permease (SulP) family protein | location=TGGT1_chrVIII:2731831-2741058(+) | protein_length=1490 | sequence_SO=chromosome | SO=protein_cod…	0	7.051	1	1	1	1	1490	158.6	8.22	4.22	1	0.914	0.827	0.878	0.905	0.78	0.883	0.906	0.668	0.954	175.9	160.8	145.5	154.4	159.1	137.1	155.3	159.4	117.4	167.8	175.9	160.8	145.5	154.4	159.1	137.1	155.3	159.4	117.4	167.8	High	High	High	High
2.4158e+18	FALSE	High	IsMasterProtein	TGGT1_200280-t26_1-p1	transcript=TGGT1_200280-t26_1 | gene=TGGT1_200280 | organism=Toxoplasma_gondii_GT1 | gene_product=WD domain, G-beta repeat-containing protein [Source:UniProtKB/TrEMBL;Acc:S7V4I8] | transcript_product=WD domain, G-beta repeat-containing protein | location=TGGT1_chrVIII:6745388-6748234(-) | protein_length=948 | sequence_SO=chromosome | SO=protein_coding_gene | is_pseudo=false	0	8.648	2	2	3	2	948	102	7.28	10.54	2	0.914	0.944	0.926	0.952	0.957	0.976	0.931	0.939	0.769	381.6	348.9	360.2	353.4	363.1	365.2	372.3	355.4	358.4	293.3	381.6	348.9	360.2	353.4	363.1	365.2	372.3	355.4	358.4	293.3	High	High	High	High
4.86278e+18	FALSE	High	IsMasterProtein	TGGT1_232410-t26_1-p1	transcript=TGGT1_232410-t26_1 | gene=TGGT1_232410 | organism=Toxoplasma_gondii_GT1 | gene_product=Thioredoxin-like_fold domain-containing protein [Source:UniProtKB/TrEMBL;Acc:A0A125YMM2] | transcript_product=PDI family protein | location=TGGT1_chrVIII:2074655-2076392(-) | protein_length=220 | sequence_SO=chromosome | SO=protein_coding_gene | is_pseudo=false	0	82.164	60	11	36	11	220	24.9	6.4	115.59	11	0.916	1.062	1.051	1.11	1.033	1.046	0.98	0.873	1.016	11851.5	10859.9	12591.1	12460	13151.3	12247	12396.9	11619.5	10351.8	12040.4	11851.5	10859.9	12591.1	12460	13151.3	12247	12396.9	11619.5	10351.8	12040.4	High	High	High	High
-6.33001e+17	FALSE	High	IsMasterProtein	TGGT1_311010-t26_1-p1	transcript=TGGT1_311010-t26_1 | gene=TGGT1_311010 | organism=Toxoplasma_gondii_GT1 | gene_product=hypothetical protein | transcript_product=hypothetical protein | location=TGGT1_chrXI:1687767-1688366(-) | protein_length=199 | sequence_SO=chromosome | SO=protein_coding_gene | is_pseudo=false	0	13.602	18	3	5	3	199	21.5	6.89	15.72	3	0.917	0.932	1.049	1.101	1.082	1.189	1.01	1.008	1.076	880.2	807.1	820.3	923.1	968.7	952.5	1046.4	889.3	887.2	947.2	880.2	807.1	820.3	923.1	968.7	952.5	1046.4	889.3	887.2	947.2	High	High	High	High
1.18508e+18	FALSE	Medium	IsMasterProtein	TGGT1_222050-t26_1-p1	transcript=TGGT1_222050-t26_1 | gene=TGGT1_222050 | organism=Toxoplasma_gondii_GT1 | gene_product=hypothetical protein | transcript_product=hypothetical protein | location=TGGT1_chrII:769157-774451(-) | protein_length=1477 | sequence_SO=chromosome | SO=protein_coding_gene | is_pseudo=false	0.024	1.553	1	1	1	1	1477	155.8	6.1	2.61	1	0.917	1.045	1.118	0.933	1.08	1.041	0.819	0.999	1.031	103.3	94.8	107.9	115.5	96.4	111.6	107.6	84.6	103.3	106.6	103.3	94.8	107.9	115.5	96.4	111.6	107.6	84.6	103.3	106.6	High	High	High	High
-5.9582e+18	FALSE	High	IsMasterProtein	TGGT1_215070-t26_1-p1	transcript=TGGT1_215070-t26_1 | gene=TGGT1_215070 | organism=Toxoplasma_gondii_GT1 | gene_product=Ferredoxin [Source:UniProtKB/TrEMBL;Acc:S7URI7] | transcript_product=ferodoxin FD | location=TGGT1_chrX:6620031-6622031(-) | protein_length=325 | sequence_SO=chromosome | SO=protein_coding_gene | is_pseudo=false	0.004	2.545	3	1	1	1	325	34.2	7.75	2.98	1	0.918	0.937	1.056	1.009	1.057	1.031	0.802	0.9	0.94	812.9	746.2	761.7	858.2	820.6	859.5	838.4	652.1	731.9	763.8	812.9	746.2	761.7	858.2	820.6	859.5	838.4	652.1	731.9	763.8	High	High	High	High
-3.17718e+18	FALSE	High	IsMasterProtein	TGGT1_291810-t26_1-p1	transcript=TGGT1_291810-t26_1 | gene=TGGT1_291810 | organism=Toxoplasma_gondii_GT1 | gene_product=Thioredoxin domain-containing protein [Source:UniProtKB/TrEMBL;Acc:A0A125YQ96] | transcript_product=thioredoxin domain-containing protein | location=TGGT1_chrIX:4167333-4170545(+) | protein_length=218 | sequence_SO=chromosome | SO=protein_coding_gene | is_pseudo=false	0	14.566	7	1	3	1	218	24.9	5.83	13.31	1	0.918	1.01	0.964	1.059	1.051	1.057	1.109	0.918	1.005	259.2	238	261.9	249.8	274.6	272.4	273.9	287.5	238	260.4	259.2	238	261.9	249.8	274.6	272.4	273.9	287.5	238	260.4	High	High	High	High
-6.73286e+18	FALSE	High	IsMasterProtein	TGGT1_240660-t26_1-p1	transcript=TGGT1_240660-t26_1 | gene=TGGT1_240660 | organism=Toxoplasma_gondii_GT1 | gene_product=hypothetical protein | transcript_product=hypothetical protein | location=TGGT1_chrVI:1347017-1351752(-) | protein_length=483 | sequence_SO=chromosome | SO=protein_coding_gene | is_pseudo=false	0	10.46	3	1	1	1	483	54.5	9.85	6.19	1	0.92	0.784	1.02	1.065	1.052	1.107	0.988	0.797	0.588	261.1	240.2	204.6	266.4	278.2	274.7	289.2	258	208.2	153.5	261.1	240.2	204.6	266.4	278.2	274.7	289.2	258	208.2	153.5	High	High	High	High
1.21035e+18	FALSE	High	IsMasterProtein	TGGT1_271178-t26_1-p1	transcript=TGGT1_271178-t26_1 | gene=TGGT1_271178 | organism=Toxoplasma_gondii_GT1 | gene_product=hypothetical protein | transcript_product=hypothetical protein | location=TGGT1_chrVIII:4650157-4650555(+) | protein_length=132 | sequence_SO=chromosome | SO=protein_coding_gene | is_pseudo=false	0.003	3.075	10	2	2	2	132	16	8.9	3.87	2	0.921	0.969	0.978	0.959	1	1.032	0.882	0.832	0.898	254.4	234.2	246.5	248.9	243.9	254.3	262.4	224.3	211.7	228.5	254.4	234.2	246.5	248.9	243.9	254.3	262.4	224.3	211.7	228.5	High	High	High	High
8.0365e+18	FALSE	High	IsMasterProtein	TGGT1_215300-t26_1-p1	transcript=TGGT1_215300-t26_1 | gene=TGGT1_215300 | organism=Toxoplasma_gondii_GT1 | gene_product=hypothetical protein | transcript_product=hypothetical protein | location=TGGT1_chrX:6777250-6779867(+) | protein_length=593 | sequence_SO=chromosome | SO=protein_coding_gene | is_pseudo=false	0	13.334	5	3	4	3	593	64.8	4.23	13	3	0.921	1.042	1.074	1.042	1.03	1.108	0.963	0.999	0.973	555.7	511.7	578.8	597	579	572.5	615.7	535.4	555.3	540.9	555.7	511.7	578.8	597	579	572.5	615.7	535.4	555.3	540.9	High	High	High	High
8.5846e+18	FALSE	High	IsMasterProtein	TGGT1_277080-t26_1-p1	transcript=TGGT1_277080-t26_1 | gene=TGGT1_277080 | organism=Toxoplasma_gondii_GT1 | gene_product=Microneme protein MIC5 [Source:UniProtKB/TrEMBL;Acc:S7W847] | transcript_product=microneme protein MIC5 | location=TGGT1_chrXII:6631512-6633486(-) | protein_length=181 | sequence_SO=chromosome | SO=protein_coding_gene | is_pseudo=false	0	206.233	71	15	122	15	181	19.9	4.94	498.01	15	0.921	1.005	1.072	1.028	1.061	1.046	0.909	1.047	1.078	39247.5	36161.8	39439.4	42067.1	40338.7	41641.1	41038	35689.3	41080.7	42317.2	39247.5	36161.8	39439.4	42067.1	40338.7	41641.1	41038	35689.3	41080.7	42317.2	High	High	High	High
-5.24855e+18	FALSE	High	IsMasterProtein	TGGT1_270220-t26_1-p1	transcript=TGGT1_270220-t26_1 | gene=TGGT1_270220 | organism=Toxoplasma_gondii_GT1 | gene_product=hypothetical protein | transcript_product=hypothetical protein | location=TGGT1_chrVIII:5324535-5328853(+) | protein_length=1296 | sequence_SO=chromosome | SO=protein_coding_gene | is_pseudo=false	0.001	4.502	1	1	1	1	1296	142.5	9.09	3.3	1	0.921	0.595	0.76	0.909	0.744	0.803	0.851	0.743	0.897	337.9	311.4	201	256.9	307.2	251.5	271.2	287.5	251	303.2	337.9	311.4	201	256.9	307.2	251.5	271.2	287.5	251	303.2	High	High	High	High
5.18526e+18	FALSE	High	IsMasterProtein	TGGT1_307830-t26_1-p1	transcript=TGGT1_307830-t26_1 | gene=TGGT1_307830 | organism=Toxoplasma_gondii_GT1 | gene_product=hypothetical protein | transcript_product=hypothetical protein | location=TGGT1_chrXII:381213-382937(-) | protein_length=219 | sequence_SO=chromosome | SO=protein_coding_gene | is_pseudo=false	0.001	5.625	7	2	4	2	219	24.1	4.87	11.58	2	0.922	0.944	1.012	0.963	0.976	1.027	0.773	0.886	0.905	658.9	607.2	622.3	666.7	634.5	642.9	676.9	509.5	584	596	658.9	607.2	622.3	666.7	634.5	642.9	676.9	509.5	584	596	High	High	High	High
6.19983e+18	FALSE	High	IsMasterProtein	TGGT1_269885A-t26_1-p1	transcript=TGGT1_269885A-t26_1 | gene=TGGT1_269885A | organism=Toxoplasma_gondii_GT1 | gene_product=Rhoptry metalloprotease toxolysin TLN1 [Source:UniProtKB/TrEMBL;Acc:S7V3X7] | transcript_product=rhoptry metalloprotease toxolysin TLN1 | location=TGGT1_chrVIII:5561686-5568242(+) | protein_length=1291 | sequence_SO=chromosome | SO=protein_coding_gene | is_pseudo=false	0	9.251	2	3	5	2	1291	142.2	6.92	12.07	3	0.922	0.832	0.916	0.944	0.914	0.95	1.041	0.778	0.914	63.3	58.3	52.6	58	59.7	57.9	60.1	65.8	49.2	57.8	63.3	58.3	52.6	58	59.7	57.9	60.1	65.8	49.2	57.8	High	High	High	High
-6.28334e+18	FALSE	High	IsMasterProtein	TGGT1_232760-t26_1-p1	transcript=TGGT1_232760-t26_1 | gene=TGGT1_232760 | organism=Toxoplasma_gondii_GT1 | gene_product=Protein phosphatase inhibitor IPP2 [Source:UniProtKB/TrEMBL;Acc:A0A125YXL4] | transcript_product=protein phosphatase inhibitor IPP2 | location=TGGT1_chrVIII:2246948-2248139(+) | protein_length=145 | sequence_SO=chromosome | SO=protein_coding_gene | is_pseudo=false	0	25.685	24	4	5	4	145	16.6	5.71	19.19	4	0.922	1.118	1.041	1.067	1.109	1.141	0.816	1.041	0.93	674.3	621.9	753.6	702	719.4	747.6	769.5	550.3	701.9	626.9	674.3	621.9	753.6	702	719.4	747.6	769.5	550.3	701.9	626.9	High	High	High	High
-1.4285e+18	FALSE	High	IsMasterProtein	TGGT1_234550-t26_1-p1	transcript=TGGT1_234550-t26_1 | gene=TGGT1_234550 | organism=Toxoplasma_gondii_GT1 | gene_product=60S ribosomal protein L29 [Source:UniProtKB/TrEMBL;Acc:A0A125YQ82] | transcript_product=ribosomal protein RPL29 | location=TGGT1_chrX:4345310-4346680(-) | protein_length=54 | sequence_SO=chromosome | SO=protein_coding_gene | is_pseudo=false	0	19.776	19	2	8	2	54	6.4	11.77	24.6	2	0.922	1.043	1.056	1.023	0.99	1.006	0.963	0.867	0.286	762.6	703.5	795.6	805.6	780.2	755	767	734.2	661.4	217.9	762.6	703.5	795.6	805.6	780.2	755	767	734.2	661.4	217.9	High	High	High	High
-3.01635e+18	FALSE	High	IsMasterProtein	TGGT1_305050-t26_1-p1	transcript=TGGT1_305050-t26_1 | gene=TGGT1_305050 | organism=Toxoplasma_gondii_GT1 | gene_product=Putative calmodulin [Source:UniProtKB/TrEMBL;Acc:A0A125YT25] | transcript_product=putative calmodulin | location=TGGT1_chrIX:4983149-4983550(+) | protein_length=133 | sequence_SO=chromosome | SO=protein_coding_gene | is_pseudo=false	0	94.744	80	10	60	10	133	15.3	5.05	238.33	10	0.923	0.974	1.021	0.995	1.019	1.013	0.673	0.955	1.033	17578	16224.1	17116	17952.5	17487	17904.4	17801.2	11830.9	16782.5	18160	17578	16224.1	17116	17952.5	17487	17904.4	17801.2	11830.9	16782.5	18160	High	High	High	High
-7.07621e+18	FALSE	Medium	IsMasterProtein	TGGT1_286070-t26_1-p1	transcript=TGGT1_286070-t26_1 | gene=TGGT1_286070 | organism=Toxoplasma_gondii_GT1 | gene_product=hypothetical protein | transcript_product=hypothetical protein | location=TGGT1_chrV:1876336-1877142(-) | protein_length=86 | sequence_SO=chromosome | SO=protein_coding_gene | is_pseudo=false	0.012	2.011	8	1	1	1	86	10	8.72	2.34	1	0.923	0.884	0.91	0.888	0.968	1.045	0.57	0.923	1.015	287.8	265.7	254.4	261.9	255.6	278.7	300.7	163.9	265.7	292	287.8	265.7	254.4	261.9	255.6	278.7	300.7	163.9	265.7	292	High	High	High	High
5.74378e+18	FALSE	High	IsMasterProtein	TGGT1_280750-t26_1-p1	transcript=TGGT1_280750-t26_1 | gene=TGGT1_280750 | organism=Toxoplasma_gondii_GT1 | gene_product=Enhancer of rudimentary homolog [Source:UniProtKB/TrEMBL;Acc:A0A125YUB6] | transcript_product=putative rudimentary enhancer | location=TGGT1_chrVIIa:103117-104812(+) | protein_length=101 | sequence_SO=chromosome | SO=protein_coding_gene | is_pseudo=false	0	17.026	41	3	5	3	101	11.8	6.9	21.24	3	0.923	1.002	1.043	1.036	1.045	1.056	0.891	1.033	0.984	968	893.7	969.5	1009.3	1002.6	1011.8	1022.6	862.8	1000.3	952.3	968	893.7	969.5	1009.3	1002.6	1011.8	1022.6	862.8	1000.3	952.3	High	High	High	High
-2.02465e+17	FALSE	Low	IsMasterProtein	TGGT1_240310B-t26_1-p1	transcript=TGGT1_240310B-t26_1 | gene=TGGT1_240310B | organism=Toxoplasma_gondii_GT1 | gene_product=Toxoplasma gondii family E protein [Source:UniProtKB/TrEMBL;Acc:S7URY3] | transcript_product=Toxoplasma gondii family E protein | location=TGGT1_chrVI:1154144-1156738(-) | protein_length=864 | sequence_SO=chromosome | SO=protein_coding_gene | is_pseudo=false	0.064	1.08	1	1	1	1	864	90.3	7.17	2.04	1	0.924	1.003	0.98	0.977	0.954	1.032	0.958	0.901	0.805	243.1	224.5	243.8	238.4	237.6	231.9	251	233	219.1	195.6	243.1	224.5	243.8	238.4	237.6	231.9	251	233	219.1	195.6	High	High	High	High
8.94346e+18	FALSE	High	IsMasterProtein	TGGT1_222220-t26_1-p1	transcript=TGGT1_222220-t26_1 | gene=TGGT1_222220 | organism=Toxoplasma_gondii_GT1 | gene_product=Alveolin domain containing intermediate filament IMC7 [Source:UniProtKB/TrEMBL;Acc:A0A125YVP0] | transcript_product=alveolin domain containing intermediate filament IMC7 | location=TGGT1_chrII:949239-952716(+) | protein_length=429 | sequence_SO=chromosome | SO=protein_coding_gene | is_pseudo=false	0	56.915	34	9	21	9	429	46.8	5.1	85.14	9	0.924	1.06	1.087	1.074	1.03	1.053	1.016	0.927	0.971	5750.9	5312.2	6097.3	6248.4	6173.7	5921.5	6054.1	5842.9	5332.4	5586.7	5750.9	5312.2	6097.3	6248.4	6173.7	5921.5	6054.1	5842.9	5332.4	5586.7	High	High	High	High
-3.38774e+18	FALSE	Medium	IsMasterProtein	TGGT1_234640-t26_1-p1	transcript=TGGT1_234640-t26_1 | gene=TGGT1_234640 | organism=Toxoplasma_gondii_GT1 | gene_product=Not3 domain-containing protein [Source:UniProtKB/TrEMBL;Acc:S7W4I1] | transcript_product=hypothetical protein | location=TGGT1_chrX:4400226-4410048(+) | protein_length=1761 | sequence_SO=chromosome | SO=protein_coding_gene | is_pseudo=false	0.01	2.145	1	1	1	1	1761	184.5	6.87	0	1	0.924	0.973	1.089	1.008	0.944	0.931	1.111	0.45	0.996	576.2	532.5	560.8	627.4	581	543.9	536.4	640	259.3	573.7	576.2	532.5	560.8	627.4	581	543.9	536.4	640	259.3	573.7	High	High	High	High
3.97737e+18	FALSE	High	IsMasterProtein	TGGT1_211630-t26_1-p1	transcript=TGGT1_211630-t26_1 | gene=TGGT1_211630 | organism=Toxoplasma_gondii_GT1 | gene_product=hypothetical protein | transcript_product=hypothetical protein | location=TGGT1_chrIV:1587042-1589369(+) | protein_length=213 | sequence_SO=chromosome | SO=protein_coding_gene | is_pseudo=false	0	29.748	21	3	5	3	213	23.6	9.01	29.3	3	0.924	1.013	1.002	0.975	1.031	0.981	0.893	0.905	0.976	2968.7	2743.7	3006.7	2974.4	2893.9	3060.4	2910.9	2649.6	2687.5	2896.2	2968.7	2743.7	3006.7	2974.4	2893.9	3060.4	2910.9	2649.6	2687.5	2896.2	High	High	High	High
4.77039e+18	FALSE	High	IsMasterProtein	TGGT1_279100-t26_1-p1	transcript=TGGT1_279100-t26_1 | gene=TGGT1_279100 | organism=Toxoplasma_gondii_GT1 | gene_product=hypothetical protein | transcript_product=hypothetical protein | location=AAQM03000427:32-1883(+) | protein_length=435 | sequence_SO=contig | SO=protein_coding_gene | is_pseudo=false	0	101.733	33	12	38	1	435	48	7.5	159.91	12	0.925	0.98	0.966	1.012	0.916	1.099	1.106	0.985	1.138	96.8	89.5	94.9	93.5	97.9	88.7	106.4	107	95.3	110.1	96.8	89.5	94.9	93.5	97.9	88.7	106.4	107	95.3	110.1	High	High	High	High
3.5643e+18	FALSE	High	IsMasterProtein	TGGT1_263710-t26_1-p1	transcript=TGGT1_263710-t26_1 | gene=TGGT1_263710 | organism=Toxoplasma_gondii_GT1 | gene_product=O-acyltransferase [Source:UniProtKB/TrEMBL;Acc:A0A125YIA6] | transcript_product=acyl-CoA:cholesterol acyltransferase alpha ACAT1-alpha | location=TGGT1_chrVIIb:346380-356116(-) | protein_length=650 | sequence_SO=chromosome | SO=protein_coding_gene | is_pseudo=false	0	12.866	5	2	2	2	650	72.6	7.83	10.22	2	0.925	0.975	1.012	1.004	0.991	0.95	1.121	0.929	0.947	183.5	169.8	178.8	185.7	184.2	181.8	174.4	205.6	170.4	173.8	183.5	169.8	178.8	185.7	184.2	181.8	174.4	205.6	170.4	173.8	High	High	High	High
-8.80338e+18	FALSE	High	IsMasterProtein	TGGT1_293710-t26_1-p1	transcript=TGGT1_293710-t26_1 | gene=TGGT1_293710 | organism=Toxoplasma_gondii_GT1 | gene_product=Zn-finger in Ran binding protein and others domain-containing protein [Source:UniProtKB/TrEMBL;Acc:A0A125YUP5] | transcript_product=Zn-finger in Ran binding protein and others domain-containing protein | location=TGGT1_chrIa:505713-507776(-) | protein_length=687 | sequence_SO=chromosome | SO=protein_…	0	11.93	5	2	2	2	687	70.6	6.48	7.46	2	0.925	1.001	1.046	1.005	1.034	1.062	0.962	0.923	1.001	286.6	265.2	287	299.9	288.2	296.3	304.3	275.7	264.4	286.9	286.6	265.2	287	299.9	288.2	296.3	304.3	275.7	264.4	286.9	High	High	High	High
-6.93004e+17	FALSE	High	IsMasterProtein	TGGT1_309210-t26_1-p1	transcript=TGGT1_309210-t26_1 | gene=TGGT1_309210 | organism=Toxoplasma_gondii_GT1 | gene_product=Thioredoxin domain-containing protein [Source:UniProtKB/TrEMBL;Acc:S7W128] | transcript_product=putative peroxiredoxin 6 | location=TGGT1_chrXI:521482-524360(-) | protein_length=402 | sequence_SO=chromosome | SO=protein_coding_gene | is_pseudo=false	0	127.012	41	17	94	17	402	44.1	8.44	347.5	17	0.926	1.073	1.043	1.007	1.072	1.08	0.86	0.954	1.03	33038.6	30587.7	35435.3	34452.2	33262.8	35407.8	35673.7	28398	31520.1	34037	33038.6	30587.7	35435.3	34452.2	33262.8	35407.8	35673.7	28398	31520.1	34037	High	High	High	High
-1.61149e+18	FALSE	High	IsMasterProtein	TGGT1_305140-t26_1-p1	transcript=TGGT1_305140-t26_1 | gene=TGGT1_305140 | organism=Toxoplasma_gondii_GT1 | gene_product=PNPLA domain-containing protein [Source:UniProtKB/TrEMBL;Acc:S7UI90] | transcript_product=phospholipase, patatin family protein | location=TGGT1_chrIX:5010164-5021415(+) | protein_length=2574 | sequence_SO=chromosome | SO=protein_coding_gene | is_pseudo=false	0	16.47	1	2	2	2	2574	276.4	6.8	10.36	2	0.926	0.987	1.057	1.029	1.01	1.01	0.998	0.975	1.003	220.9	204.6	218.1	233.6	227.4	223	223.1	220.4	215.4	221.5	220.9	204.6	218.1	233.6	227.4	223	223.1	220.4	215.4	221.5	High	High	High	High
-5.72834e+18	FALSE	High	IsMasterProtein	TGGT1_247360-t26_1-p1	transcript=TGGT1_247360-t26_1 | gene=TGGT1_247360 | organism=Toxoplasma_gondii_GT1 | gene_product=acidPPc domain-containing protein [Source:UniProtKB/TrEMBL;Acc:A0A125YJ69] | transcript_product=PAP2 superfamily protein | location=TGGT1_chrXII:3212089-3213051(-) | protein_length=320 | sequence_SO=chromosome | SO=protein_coding_gene | is_pseudo=false	0	10.212	8	2	6	2	320	35	5.91	21.1	2	0.926	1.106	0.988	0.979	0.986	0.987	0.919	1.031	1.015	1240.1	1148.5	1371.8	1224.8	1213.6	1223	1224.2	1139.2	1278.2	1258.3	1240.1	1148.5	1371.8	1224.8	1213.6	1223	1224.2	1139.2	1278.2	1258.3	High	High	High	High
-3570170721728500	FALSE	Medium	IsMasterProtein	TGGT1_245580-t26_1-p1	transcript=TGGT1_245580-t26_1 | gene=TGGT1_245580 | organism=Toxoplasma_gondii_GT1 | gene_product=Protein kinase domain-containing protein [Source:UniProtKB/TrEMBL;Acc:S7V1A4] | transcript_product=hypothetical protein | location=TGGT1_chrXII:2332712-2345516(+) | protein_length=2313 | sequence_SO=chromosome | SO=protein_coding_gene | is_pseudo=false	0.03	1.46	0	1	1	1	2313	246.4	8.6	2.21	1	0.926	0.952	0.99	1.056	1.048	1.114	0.978	1.017	0.643	237.8	220.3	226.3	235.3	251.2	249.2	264.9	232.6	241.9	152.8	237.8	220.3	226.3	235.3	251.2	249.2	264.9	232.6	241.9	152.8	High	High	High	High
-3.17017e+18	FALSE	High	IsMasterProtein	TGGT1_217550-t26_1-p1	transcript=TGGT1_217550-t26_1 | gene=TGGT1_217550 | organism=Toxoplasma_gondii_GT1 | gene_product=hypothetical protein | transcript_product=hypothetical protein | location=TGGT1_chrXII:1839426-1841786(+) | protein_length=194 | sequence_SO=chromosome | SO=protein_coding_gene | is_pseudo=false	0.001	4.236	5	1	1	1	194	20.4	6.52	3.13	1	0.927	0.91	0.951	1.006	0.931	0.963	0.953	0.919	0.888	256.2	237.5	233.3	243.7	257.7	238.6	246.9	244.2	235.5	227.5	256.2	237.5	233.3	243.7	257.7	238.6	246.9	244.2	235.5	227.5	High	High	High	High
7.86578e+18	FALSE	High	IsMasterProtein	TGGT1_266460-t26_1-p1	transcript=TGGT1_266460-t26_1 | gene=TGGT1_266460 | organism=Toxoplasma_gondii_GT1 | gene_product=Ubiquitin-like domain-containing protein [Source:UniProtKB/TrEMBL;Acc:A0A125YUS7] | transcript_product=putative small ubiquitin family modifier | location=TGGT1_chrIX:944091-944969(-) | protein_length=91 | sequence_SO=chromosome | SO=protein_coding_gene | is_pseudo=false	0	11.227	29	3	10	3	91	10.3	5.97	31.01	3	0.927	0.966	0.975	0.943	0.982	0.97	0.679	0.859	0.866	5610.7	5200.2	5421.6	5473	5291.6	5508.4	5443.8	3811.5	4818.4	4858	5610.7	5200.2	5421.6	5473	5291.6	5508.4	5443.8	3811.5	4818.4	4858	High	High	High	High
4.42221e+17	FALSE	High	IsMasterProtein	TGGT1_315280-t26_1-p1	transcript=TGGT1_315280-t26_1 | gene=TGGT1_315280 | organism=Toxoplasma_gondii_GT1 | gene_product=hypothetical protein | transcript_product=hypothetical protein | location=TGGT1_chrXI:4568379-4573221(+) | protein_length=1076 | sequence_SO=chromosome | SO=protein_coding_gene | is_pseudo=false	0	14.192	4	4	5	4	1076	117.7	6.2	14.6	4	0.927	0.934	0.956	1	0.971	0.994	0.977	0.876	0.884	484.1	449	452	462.8	483.9	470.1	481	473	424.2	428	484.1	449	452	462.8	483.9	470.1	481	473	424.2	428	High	High	High	High
-5.74008e+16	FALSE	High	IsMasterProtein	TGGT1_310760-t26_1-p1	transcript=TGGT1_310760-t26_1 | gene=TGGT1_310760 | organism=Toxoplasma_gondii_GT1 | gene_product=PPM-type phosphatase domain-containing protein [Source:UniProtKB/TrEMBL;Acc:S7W916] | transcript_product=protein phosphatase 2C domain-containing protein | location=TGGT1_chrXI:1539107-1545094(+) | protein_length=344 | sequence_SO=chromosome | SO=protein_coding_gene | is_pseudo=false	0	10.949	8	2	2	2	344	37.6	7.12	7.15	2	0.929	1.015	0.983	1.29	1.007	1.055	1.106	1.01	1.321	89	82.7	90.3	87.5	114.9	89.6	93.9	98.5	90	117.6	89	82.7	90.3	87.5	114.9	89.6	93.9	98.5	90	117.6	High	High	High	High
6.77984e+18	FALSE	High	IsMasterProtein	TGGT1_248360-t26_1-p1	transcript=TGGT1_248360-t26_1 | gene=TGGT1_248360 | organism=Toxoplasma_gondii_GT1 | gene_product=hypothetical protein | transcript_product=hypothetical protein | location=TGGT1_chrXII:3757559-3758993(-) | protein_length=247 | sequence_SO=chromosome | SO=protein_coding_gene | is_pseudo=false	0	22.496	22	3	4	3	247	27.1	4.56	18.46	3	0.929	1.049	1.03	1.023	1.031	1.091	0.854	0.985	1.001	1281.2	1190.1	1344.1	1319.5	1310.8	1321.3	1397.6	1094.3	1261.6	1282.9	1281.2	1190.1	1344.1	1319.5	1310.8	1321.3	1397.6	1094.3	1261.6	1282.9	High	High	High	High
-1.25577e+18	FALSE	High	IsMasterProtein	TGGT1_277230-t26_1-p1	transcript=TGGT1_277230-t26_1 | gene=TGGT1_277230 | organism=Toxoplasma_gondii_GT1 | gene_product=hypothetical protein | transcript_product=hypothetical protein | location=TGGT1_chrXII:6607725-6609011(+) | protein_length=428 | sequence_SO=chromosome | SO=protein_coding_gene | is_pseudo=false	0	10.883	5	1	2	1	428	44.9	4.28	10.58	1	0.929	0.965	1.005	0.99	1.089	1.088	0.932	0.896	1.059	133.9	124.4	129.2	134.6	132.6	145.8	145.7	124.7	120	141.7	133.9	124.4	129.2	134.6	132.6	145.8	145.7	124.7	120	141.7	High	High	High	High
-7.64538e+18	FALSE	High	IsMasterProtein	TGGT1_203860-t26_1-p1	transcript=TGGT1_203860-t26_1 | gene=TGGT1_203860 | organism=Toxoplasma_gondii_GT1 | gene_product=hypothetical protein | transcript_product=hypothetical protein | location=TGGT1_chrVIIa:2078127-2080127(-) | protein_length=495 | sequence_SO=chromosome | SO=protein_coding_gene | is_pseudo=false	0	15.397	6	2	2	2	495	51.3	6.89	10.81	2	0.93	0.889	1.013	1.027	1.044	1.102	1.025	0.89	0.966	760	707.1	675.9	770.3	780.9	793.4	837.6	779.4	676.4	734.2	760	707.1	675.9	770.3	780.9	793.4	837.6	779.4	676.4	734.2	High	High	High	High
7.47032e+18	FALSE	High	IsMasterProtein	TGGT1_201880-t26_1-p1	transcript=TGGT1_201880-t26_1 | gene=TGGT1_201880 | organism=Toxoplasma_gondii_GT1 | gene_product=hypothetical protein | transcript_product=hypothetical protein | location=TGGT1_chrVIIa:3628377-3629768(+) | protein_length=128 | sequence_SO=chromosome | SO=protein_coding_gene | is_pseudo=false	0	21.243	36	6	16	6	128	15.3	9.38	44.83	6	0.931	0.938	0.953	0.91	0.945	0.93	0.797	0.885	0.842	6622	6165.3	6208.2	6308	6023.6	6260.5	6159.1	5278.7	5860.8	5572.5	6622	6165.3	6208.2	6308	6023.6	6260.5	6159.1	5278.7	5860.8	5572.5	High	High	High	High
6.40107e+18	FALSE	High	IsMasterProtein	TGGT1_312600-t26_1-p1	transcript=TGGT1_312600-t26_1 | gene=TGGT1_312600 | organism=Toxoplasma_gondii_GT1 | gene_product=SHSP domain-containing protein [Source:UniProtKB/TrEMBL;Acc:S7UTP6] | transcript_product=heat shock protein HSP21 | location=TGGT1_chrXI:2781847-2783667(+) | protein_length=195 | sequence_SO=chromosome | SO=protein_coding_gene | is_pseudo=false	0	48.997	31	6	31	6	195	21.3	6.61	109.94	6	0.931	0.94	0.956	0.919	0.971	0.945	0.821	0.847	0.761	8573.6	7984.6	8057.3	8197.6	7877	8325.8	8103.9	7035.7	7264.8	6524.6	8573.6	7984.6	8057.3	8197.6	7877	8325.8	8103.9	7035.7	7264.8	6524.6	High	High	High	High
5.42296e+18	FALSE	Low	IsMasterProtein	TGGT1_247050-t26_1-p1	transcript=TGGT1_247050-t26_1 | gene=TGGT1_247050 | organism=Toxoplasma_gondii_GT1 | gene_product=hypothetical protein | transcript_product=hypothetical protein | location=TGGT1_chrXII:3061422-3074479(+) | protein_length=2660 | sequence_SO=chromosome | SO=protein_coding_gene | is_pseudo=false	0.061	1.099	1	1	1	1	2660	287.1	6.68	2.3	1	0.932	0.934	0.937	0.89	0.973	1.042	0.963	0.812	1.003	41.8	38.9	39	39.2	37.2	40.6	43.5	40.2	33.9	41.9	41.8	38.9	39	39.2	37.2	40.6	43.5	40.2	33.9	41.9	High	High	High	High
-3.83471e+18	FALSE	High	IsMasterProtein	TGGT1_299670-t26_1-p1	transcript=TGGT1_299670-t26_1 | gene=TGGT1_299670 | organism=Toxoplasma_gondii_GT1 | gene_product=hypothetical protein | transcript_product=hypothetical protein | location=TGGT1_chrXII:312905-318735(+) | protein_length=592 | sequence_SO=chromosome | SO=protein_coding_gene | is_pseudo=false	0	20.552	8	3	3	3	592	65.6	10.84	13.81	3	0.932	0.899	1.003	0.982	0.993	1.096	1.005	0.92	0.843	454.1	423	408.4	455.4	446.1	450.9	497.8	456.5	417.8	382.9	454.1	423	408.4	455.4	446.1	450.9	497.8	456.5	417.8	382.9	High	High	High	High
-3.48371e+18	FALSE	Medium	IsMasterProtein	TGGT1_215890-t26_1-p1	transcript=TGGT1_215890-t26_1 | gene=TGGT1_215890 | organism=Toxoplasma_gondii_GT1 | gene_product=hypothetical protein | transcript_product=hypothetical protein | location=TGGT1_chrXI:6486186-6496186(+) | protein_length=1427 | sequence_SO=chromosome | SO=protein_coding_gene | is_pseudo=false	0.016	1.761	1	1	1	1	1427	155	6.01	2.16	1	0.932	0.958	0.998	1.141	0.983	1.05	1.123	0.983	1.037	158.2	147.4	151.5	157.9	180.5	155.6	166.1	177.7	155.5	164	158.2	147.4	151.5	157.9	180.5	155.6	166.1	177.7	155.5	164	High	High	High	High
-7.06876e+18	FALSE	High	IsMasterProtein	TGGT1_308870-t26_1-p1	transcript=TGGT1_308870-t26_1 | gene=TGGT1_308870 | organism=Toxoplasma_gondii_GT1 | gene_product=C3H1-type domain-containing protein [Source:UniProtKB/TrEMBL;Acc:S7US37] | transcript_product=hypothetical protein | location=TGGT1_chrXI:276950-282861(+) | protein_length=693 | sequence_SO=chromosome | SO=protein_coding_gene | is_pseudo=false	0	30.601	11	6	13	6	693	75	7.99	50.52	6	0.932	1.028	1.048	1.037	1.06	1.098	1.005	1.025	1.05	2513.9	2343.3	2583.7	2635.7	2606.9	2664	2759.9	2526.8	2577.5	2638.6	2513.9	2343.3	2583.7	2635.7	2606.9	2664	2759.9	2526.8	2577.5	2638.6	High	High	High	High
8.33104e+18	FALSE	Low	IsMasterProtein	TGGT1_276940-t26_1-p1	transcript=TGGT1_276940-t26_1 | gene=TGGT1_276940 | organism=Toxoplasma_gondii_GT1 | gene_product=Putative ribosome associated membrane protein RAMP4 [Source:UniProtKB/TrEMBL;Acc:A0A125YJA2] | transcript_product=putative ribosome associated membrane protein RAMP4 | location=TGGT1_chrXII:6746134-6746942(+) | protein_length=68 | sequence_SO=chromosome | SO=protein_coding_gene | is_pseudo=false	0.051	1.212	9	1	3	1	68	7.6	10.52	7.75	1	0.932	0.986	1.006	0.968	0.973	0.992	0.866	0.948	0.998	1520.5	1417.4	1499.2	1529.8	1471.2	1479.6	1508.9	1316.9	1441.9	1517.1	1520.5	1417.4	1499.2	1529.8	1471.2	1479.6	1508.9	1316.9	1441.9	1517.1	High	High	High	High
-2.27191e+18	FALSE	High	IsMasterProtein	TGGT1_205330-t26_1-p1	transcript=TGGT1_205330-t26_1 | gene=TGGT1_205330 | organism=Toxoplasma_gondii_GT1 | gene_product=hypothetical protein | transcript_product=hypothetical protein | location=TGGT1_chrVIIa:1382464-1383827(-) | protein_length=331 | sequence_SO=chromosome | SO=protein_coding_gene | is_pseudo=false	0	13.913	9	2	4	2	331	35.3	5.69	20.24	2	0.933	1.032	0.987	1.008	1.056	1.045	0.928	0.954	0.918	1331.6	1241.9	1373.6	1314.1	1342.2	1406.8	1391.5	1235.7	1270.2	1222.2	1331.6	1241.9	1373.6	1314.1	1342.2	1406.8	1391.5	1235.7	1270.2	1222.2	High	High	High	High
-5.76429e+18	FALSE	High	IsMasterProtein	TGGT1_295370-t26_1-p1	transcript=TGGT1_295370-t26_1 | gene=TGGT1_295370 | organism=Toxoplasma_gondii_GT1 | gene_product=hypothetical protein | transcript_product=hypothetical protein | location=TGGT1_chrIa:1786369-1788292(+) | protein_length=273 | sequence_SO=chromosome | SO=protein_coding_gene | is_pseudo=false	0	17.889	11	3	8	3	273	29.7	6.33	25.89	3	0.933	0.934	0.947	0.97	0.981	1.007	0.857	0.866	0.836	941.6	878.3	879.2	891.7	913.4	924.1	948.5	806.8	815.9	786.9	941.6	878.3	879.2	891.7	913.4	924.1	948.5	806.8	815.9	786.9	High	High	High	High
-8.80251e+18	FALSE	High	IsMasterProtein	TGGT1_297080-t26_1-p1	transcript=TGGT1_297080-t26_1 | gene=TGGT1_297080 | organism=Toxoplasma_gondii_GT1 | gene_product=Pyridoxal kinase [Source:UniProtKB/TrEMBL;Acc:S7UKZ9] | transcript_product=pyridoxal kinase | location=TGGT1_chrII:1498035-1500080(+) | protein_length=616 | sequence_SO=chromosome | SO=protein_coding_gene | is_pseudo=false	0	11.094	3	1	1	1	616	66.7	6.89	5.37	1	0.933	0.983	1.002	0.968	0.916	0.968	0.847	0.777	0.76	338.6	316	332.9	339.2	327.8	310.2	327.8	286.9	263.2	257.2	338.6	316	332.9	339.2	327.8	310.2	327.8	286.9	263.2	257.2	High	High	High	High
7.11847e+18	FALSE	High	IsMasterProtein	TGGT1_237015-t26_1-p1	transcript=TGGT1_237015-t26_1 | gene=TGGT1_237015 | organism=Toxoplasma_gondii_GT1 | gene_product=hypothetical protein | transcript_product=hypothetical protein | location=TGGT1_chrX:5566838-5567632(-) | protein_length=264 | sequence_SO=chromosome | SO=protein_coding_gene | is_pseudo=false	0	29.858	20	4	8	4	264	29.3	8.73	27.21	4	0.934	0.86	0.969	0.99	0.971	0.956	1.102	1.034	0.98	462	431.3	397.4	447.7	457.5	448.5	441.5	509.2	477.8	452.9	462	431.3	397.4	447.7	457.5	448.5	441.5	509.2	477.8	452.9	High	High	High	High
-1.51911e+17	FALSE	High	IsMasterProtein	TGGT1_251950-t26_1-p1	transcript=TGGT1_251950-t26_1 | gene=TGGT1_251950 | organism=Toxoplasma_gondii_GT1 | gene_product=Ribosomal_L12 domain-containing protein [Source:UniProtKB/TrEMBL;Acc:S7V029] | transcript_product=ribosomal protein l7/l12 c-terminal domain-containing protein | location=TGGT1_chrXII:5601980-5605121(+) | protein_length=354 | sequence_SO=chromosome | SO=protein_coding_gene | is_pseudo=false	0	38.735	21	7	17	7	354	36.7	8.92	62.23	7	0.934	1.041	1.024	1.05	1.032	1.041	0.974	0.959	1.034	7212.2	6734.6	7506.9	7385.4	7572.5	7444.3	7510.7	7026.2	6920.1	7458.3	7212.2	6734.6	7506.9	7385.4	7572.5	7444.3	7510.7	7026.2	6920.1	7458.3	High	High	High	High
5.5894e+18	FALSE	High	IsMasterProtein	TGGT1_295620-t26_1-p1	transcript=TGGT1_295620-t26_1 | gene=TGGT1_295620 | organism=Toxoplasma_gondii_GT1 | gene_product=C3H1-type domain-containing protein [Source:UniProtKB/TrEMBL;Acc:A0A125YIL5] | transcript_product=hypothetical protein | location=TGGT1_chrIa:1655687-1659951(+) | protein_length=1237 | sequence_SO=chromosome | SO=protein_coding_gene | is_pseudo=false	0.001	4.574	1	1	1	1	1237	128.4	6.86	3.68	1	0.934	0.931	0.942	1.059	0.978	1.003	0.967	0.945	0.879	351.6	328.4	327.3	331.3	372.3	344	352.5	339.8	332.2	309	351.6	328.4	327.3	331.3	372.3	344	352.5	339.8	332.2	309	High	High	High	High
-1.06094e+17	FALSE	High	IsMasterProtein	TGGT1_233480-t26_1-p1	transcript=TGGT1_233480-t26_1 | gene=TGGT1_233480 | organism=Toxoplasma_gondii_GT1 | gene_product=SAG-related sequence SRS29C [Source:UniProtKB/TrEMBL;Acc:S7WBY8] | transcript_product=SAG-related sequence SRS29C | location=TGGT1_chrVIII:2667297-2668415(+) | protein_length=372 | sequence_SO=chromosome | SO=protein_coding_gene | is_pseudo=false	0	81.723	24	7	118	7	372	39.2	7.52	508.82	7	0.934	0.994	1.003	0.95	0.983	0.978	0.844	0.911	0.875	27981	26138.5	27801.3	28074.3	26585.2	27501.5	27358.5	23611	25485	24485.2	27981	26138.5	27801.3	28074.3	26585.2	27501.5	27358.5	23611	25485	24485.2	High	High	High	High
8.36253e+18	FALSE	Low	IsMasterProtein	TGGT1_314370-t26_1-p1	transcript=TGGT1_314370-t26_1 | gene=TGGT1_314370 | organism=Toxoplasma_gondii_GT1 | gene_product=hypothetical protein | transcript_product=hypothetical protein | location=TGGT1_chrXI:4009722-4013794(-) | protein_length=844 | sequence_SO=chromosome | SO=protein_coding_gene | is_pseudo=false	0.056	1.14	1	1	1	1	844	87.8	9.13	2.2	1	0.934	0.912	0.981	0.922	0.784	0.862	0.888	1.004	0.9	142.1	132.8	129.6	139.4	131.1	111.3	122.5	126.1	142.7	127.8	142.1	132.8	129.6	139.4	131.1	111.3	122.5	126.1	142.7	127.8	High	High	High	High
7.96196e+18	FALSE	High	IsMasterProtein	TGGT1_252310-t26_1-p1	transcript=TGGT1_252310-t26_1 | gene=TGGT1_252310 | organism=Toxoplasma_gondii_GT1 | gene_product=hypothetical protein | transcript_product=hypothetical protein | location=TGGT1_chrIII:470184-470903(-) | protein_length=239 | sequence_SO=chromosome | SO=protein_coding_gene | is_pseudo=false	0.003	3.277	4	1	1	1	239	25.1	4.64	2.92	1	0.935	1.105	1.079	1.079	1.024	1.18	0.978	1.026	0.961	245.8	229.8	271.6	265.3	265.2	251.8	290.1	240.4	252.2	236.2	245.8	229.8	271.6	265.3	265.2	251.8	290.1	240.4	252.2	236.2	High	High	High	High
-7.29411e+18	FALSE	High	IsMasterProtein	TGGT1_225230-t26_1-p1	transcript=TGGT1_225230-t26_1 | gene=TGGT1_225230 | organism=Toxoplasma_gondii_GT1 | gene_product=hypothetical protein | transcript_product=hypothetical protein | location=TGGT1_chrX:2296184-2298591(-) | protein_length=744 | sequence_SO=chromosome | SO=protein_coding_gene | is_pseudo=false	0.004	2.78	3	2	2	2	744	76.7	9.28	4.86	2	0.935	1.078	0.931	1.026	1.041	1.137	1.08	0.84	1.079	53.7	50.2	57.9	50	55.1	55.9	61	58	45.1	57.9	53.7	50.2	57.9	50	55.1	55.9	61	58	45.1	57.9	High	High	High	High
8.15448e+18	FALSE	High	IsMasterProtein	TGGT1_273950-t26_1-p1	transcript=TGGT1_273950-t26_1 | gene=TGGT1_273950 | organism=Toxoplasma_gondii_GT1 | gene_product=Putative replication factor C subunit 5 [Source:UniProtKB/TrEMBL;Acc:A0A125YX47] | transcript_product=putative replication factor C subunit 5 | location=TGGT1_chrVIII:3148051-3151105(-) | protein_length=396 | sequence_SO=chromosome | SO=protein_coding_gene | is_pseudo=false	0.001	4.498	3	1	1	1	396	43.4	9.17	3.15	1	0.935	0.675	0.774	1.053	0.963	0.819	1.018	0.84	0.898	97.5	91.1	65.8	75.4	102.6	93.8	79.8	99.2	81.9	87.5	97.5	91.1	65.8	75.4	102.6	93.8	79.8	99.2	81.9	87.5	High	High	High	High
-4.25205e+18	FALSE	High	IsMasterProtein	TGGT1_248700-t26_1-p1	transcript=TGGT1_248700-t26_1 | gene=TGGT1_248700 | organism=Toxoplasma_gondii_GT1 | gene_product=Alveolin domain containing intermediate filament IMC12 [Source:UniProtKB/TrEMBL;Acc:S7WGS9] | transcript_product=alveolin domain containing intermediate filament IMC12 | location=TGGT1_chrXII:4033434-4035280(+) | protein_length=277 | sequence_SO=chromosome | SO=protein_coding_gene | is_pseudo=false	0	23.467	22	6	18	6	277	29.8	5.34	53.69	6	0.935	1.104	1.093	1.107	1.042	1.105	1.07	0.981	1.087	4559.5	4262.9	5032.9	4983.3	5046.1	4749.2	5038.6	4878.1	4471.4	4957.3	4559.5	4262.9	5032.9	4983.3	5046.1	4749.2	5038.6	4878.1	4471.4	4957.3	High	High	High	High
4.01113e+18	FALSE	High	IsMasterProtein	TGGT1_320600-t26_1-p1	transcript=TGGT1_320600-t26_1 | gene=TGGT1_320600 | organism=Toxoplasma_gondii_GT1 | gene_product=CSD_1 domain-containing protein [Source:UniProtKB/TrEMBL;Acc:S7VSL4] | transcript_product=cold-shock DNA-binding domain-containing protein | location=TGGT1_chrIV:154209-155894(+) | protein_length=209 | sequence_SO=chromosome | SO=protein_coding_gene | is_pseudo=false	0	73.331	33	8	91	8	209	23.1	9.82	343.42	8	0.935	1.059	1.028	0.99	1.023	1.034	0.88	0.884	0.934	19823.9	18537	20989.6	20369.7	19626.9	20274.4	20489.1	17438.3	17534.1	18515.6	19823.9	18537	20989.6	20369.7	19626.9	20274.4	20489.1	17438.3	17534.1	18515.6	High	High	High	High
-2.87785e+18	FALSE	High	IsMasterProtein	TGGT1_217560-t26_1-p1	transcript=TGGT1_217560-t26_1 | gene=TGGT1_217560 | organism=Toxoplasma_gondii_GT1 | gene_product=DNA-directed RNA polymerase II RPB10 [Source:UniProtKB/TrEMBL;Acc:A0A125YU82] | transcript_product=DNA-directed RNA polymerase II RPB10 | location=TGGT1_chrXII:1849703-1850903(-) | protein_length=72 | sequence_SO=chromosome | SO=protein_coding_gene | is_pseudo=false	0	6.496	24	2	2	2	72	8.5	5.41	6.59	2	0.935	0.935	0.893	0.861	0.831	0.8	0.758	0.796	0.801	1248	1167.1	1167.2	1114.6	1074.3	1037.4	998.3	945.6	993.1	1000.1	1248	1167.1	1167.2	1114.6	1074.3	1037.4	998.3	945.6	993.1	1000.1	High	High	High	High
5.54149e+17	FALSE	High	IsMasterProtein	TGGT1_240550-t26_1-p1	transcript=TGGT1_240550-t26_1 | gene=TGGT1_240550 | organism=Toxoplasma_gondii_GT1 | gene_product=Putative copper chaperone COX17-1 [Source:UniProtKB/TrEMBL;Acc:S7W0A5] | transcript_product=putative copper chaperone COX17-1 | location=TGGT1_chrVI:1289164-1289397(+) | protein_length=77 | sequence_SO=chromosome | SO=protein_coding_gene | is_pseudo=false	0	6.952	22	2	3	2	77	8.2	7.59	8.42	2	0.935	0.837	0.939	0.964	0.951	1.011	0.626	1.008	1.246	2238.2	2093.7	1873.5	2101.1	2157.7	2128.6	2262.9	1400.6	2255	2789.2	2238.2	2093.7	1873.5	2101.1	2157.7	2128.6	2262.9	1400.6	2255	2789.2	High	High	High	High
6.34242e+18	FALSE	High	IsMasterProtein	TGGT1_225050-t26_1-p1	transcript=TGGT1_225050-t26_1 | gene=TGGT1_225050 | organism=Toxoplasma_gondii_GT1 | gene_product=Adenosylhomocysteinase [Source:UniProtKB/TrEMBL;Acc:S7UW44] | transcript_product=putative adenosylhomocysteinase | location=TGGT1_chrX:2464799-2467238(-) | protein_length=588 | sequence_SO=chromosome | SO=protein_coding_gene | is_pseudo=false	0	199.766	47	26	100	26	588	64.1	7.71	367.69	26	0.936	1.079	1.058	1.043	1.085	1.122	1.066	1.209	1.215	33224.8	31086.4	35839.2	35142.6	34663.6	36053.2	37291.1	35418.6	40164.2	40363.8	33224.8	31086.4	35839.2	35142.6	34663.6	36053.2	37291.1	35418.6	40164.2	40363.8	High	High	High	High
6.07129e+18	FALSE	High	IsMasterProtein	TGGT1_271810-t26_1-p1	transcript=TGGT1_271810-t26_1 | gene=TGGT1_271810 | organism=Toxoplasma_gondii_GT1 | gene_product=Putative lanp [Source:UniProtKB/TrEMBL;Acc:S7V3U0] | transcript_product=putative lanp | location=TGGT1_chrVIII:4346960-4348612(-) | protein_length=283 | sequence_SO=chromosome | SO=protein_coding_gene | is_pseudo=false	0	88.04	46	12	38	12	283	32	4.23	145.17	12	0.936	1.04	1.041	1.015	1.057	1.051	0.915	1.039	1.047	14729.7	13787.5	15315.5	15333.4	14950.1	15563.6	15485.7	13482.4	15299.5	15416.2	14729.7	13787.5	15315.5	15333.4	14950.1	15563.6	15485.7	13482.4	15299.5	15416.2	High	High	High	High
-8.69939e+18	FALSE	High	IsMasterProtein	TGGT1_215680-t26_1-p1	transcript=TGGT1_215680-t26_1 | gene=TGGT1_215680 | organism=Toxoplasma_gondii_GT1 | gene_product=SAG-related sequence SRS18 [Source:UniProtKB/TrEMBL;Acc:S7UPZ0] | transcript_product=SAG-related sequence SRS18 | location=TGGT1_chrX:6976284-6977972(-) | protein_length=368 | sequence_SO=chromosome | SO=protein_coding_gene | is_pseudo=false	0	24.901	13	4	6	4	368	39.4	4.98	25.88	4	0.936	0.991	1.013	0.986	1.034	1.043	0.964	0.948	0.944	2474.1	2316	2452.9	2505.5	2439.8	2557.9	2579.9	2384.9	2345	2334.3	2474.1	2316	2452.9	2505.5	2439.8	2557.9	2579.9	2384.9	2345	2334.3	High	High	High	High
1.53039e+18	FALSE	High	IsMasterProtein	TGGT1_293740-t26_1-p1	transcript=TGGT1_293740-t26_1 | gene=TGGT1_293740 | organism=Toxoplasma_gondii_GT1 | gene_product=hypothetical protein | transcript_product=hypothetical protein | location=TGGT1_chrIa:526546-528232(+) | protein_length=96 | sequence_SO=chromosome | SO=protein_coding_gene | is_pseudo=false	0	37.709	64	6	16	6	96	10.6	5.52	56.47	6	0.936	0.905	0.954	0.923	0.904	0.921	0.55	0.778	0.835	7165.3	6708.4	6483.4	6838.6	6612.1	6480.7	6601.3	3939.7	5577.6	5981	7165.3	6708.4	6483.4	6838.6	6612.1	6480.7	6601.3	3939.7	5577.6	5981	High	High	High	High
-8.57452e+18	FALSE	High	IsMasterProtein	TGGT1_318140-t26_1-p1	transcript=TGGT1_318140-t26_1 | gene=TGGT1_318140 | organism=Toxoplasma_gondii_GT1 | gene_product=SART-1 family protein [Source:UniProtKB/TrEMBL;Acc:S7UKH3] | transcript_product=SART-1 family protein | location=TGGT1_chrIV:1468174-1476334(+) | protein_length=861 | sequence_SO=chromosome | SO=protein_coding_gene | is_pseudo=false	0	80.78	23	16	24	16	861	97.6	5.59	75.58	16	0.936	1.015	1.038	1.051	1.1	1.135	1.355	1.062	1.054	5219.4	4887.7	5295.4	5415.6	5483.4	5742.9	5922.1	7070.2	5544.1	5503.4	5219.4	4887.7	5295.4	5415.6	5483.4	5742.9	5922.1	7070.2	5544.1	5503.4	High	High	High	High
-5.66262e+18	FALSE	High	IsMasterProtein	TGGT1_273850-t26_1-p1	transcript=TGGT1_273850-t26_1 | gene=TGGT1_273850 | organism=Toxoplasma_gondii_GT1 | gene_product=Nsp1_C domain-containing protein [Source:UniProtKB/TrEMBL;Acc:S7V3H4] | transcript_product=hypothetical protein | location=TGGT1_chrVIII:3220664-3222886(-) | protein_length=723 | sequence_SO=chromosome | SO=protein_coding_gene | is_pseudo=false	0	29.952	8	5	7	5	723	68.6	5.76	25.97	5	0.937	1.044	1.032	1.025	1.021	1.046	0.997	0.946	0.991	1821.5	1706	1902	1879.7	1867.8	1858.9	1905.5	1815.7	1722.9	1804.3	1821.5	1706	1902	1879.7	1867.8	1858.9	1905.5	1815.7	1722.9	1804.3	High	High	High	High
6.55757e+18	FALSE	High	IsMasterProtein	TGGT1_215230-t26_1-p1	transcript=TGGT1_215230-t26_1 | gene=TGGT1_215230 | organism=Toxoplasma_gondii_GT1 | gene_product=RRM domain-containing protein [Source:UniProtKB/TrEMBL;Acc:S7VYN7] | transcript_product=RNA recognition motif-containing protein | location=TGGT1_chrX:6720798-6728105(-) | protein_length=728 | sequence_SO=chromosome | SO=protein_coding_gene | is_pseudo=false	0	97.26	31	16	26	16	728	80.7	4.82	93.36	16	0.937	0.95	0.942	0.997	0.966	0.948	0.928	0.904	0.891	5517.2	5168.3	5242.3	5197.3	5499.1	5332.4	5228.1	5122.6	4987.2	4915.9	5517.2	5168.3	5242.3	5197.3	5499.1	5332.4	5228.1	5122.6	4987.2	4915.9	High	High	High	High
-3.25519e+18	FALSE	High	IsMasterProtein	TGGT1_314470-t26_1-p1	transcript=TGGT1_314470-t26_1 | gene=TGGT1_314470 | organism=Toxoplasma_gondii_GT1 | gene_product=hypothetical protein | transcript_product=hypothetical protein | location=TGGT1_chrXI:4080284-4082872(+) | protein_length=362 | sequence_SO=chromosome | SO=protein_coding_gene | is_pseudo=false	0	9.388	5	1	1	1	362	39.7	7.44	5.27	1	0.937	0.994	1.182	1.444	1.124	1.104	1.335	1.022	1.106	50.1	47	49.8	59.2	72.3	56.3	55.3	66.9	51.2	55.4	50.1	47	49.8	59.2	72.3	56.3	55.3	66.9	51.2	55.4	High	High	High	High
5.4778e+18	FALSE	High	IsMasterProtein	TGGT1_216770-t26_1-p1	transcript=TGGT1_216770-t26_1 | gene=TGGT1_216770 | organism=Toxoplasma_gondii_GT1 | gene_product=hypothetical protein | transcript_product=hypothetical protein | location=TGGT1_chrXI:5822150-5822641(+) | protein_length=163 | sequence_SO=chromosome | SO=protein_coding_gene | is_pseudo=false	0	7.166	17	3	4	3	163	17.6	9.88	12.17	3	0.937	0.945	0.998	1.022	1.049	1.07	1.272	1.036	1.038	1324.2	1241.3	1251.6	1320.9	1352.9	1389.5	1417	1685	1372.2	1375.1	1324.2	1241.3	1251.6	1320.9	1352.9	1389.5	1417	1685	1372.2	1375.1	High	High	High	High
4.53649e+18	FALSE	High	IsMasterProtein	TGGT1_202890-t26_1-p1	transcript=TGGT1_202890-t26_1 | gene=TGGT1_202890 | organism=Toxoplasma_gondii_GT1 | gene_product=hypothetical protein | transcript_product=hypothetical protein | location=TGGT1_chrVIIa:2858390-2859523(-) | protein_length=377 | sequence_SO=chromosome | SO=protein_coding_gene | is_pseudo=false	0	52.858	27	10	21	10	377	39.3	4.86	74.76	10	0.938	1.059	1.029	1.037	1.016	1.035	1.198	0.988	1.162	6875	6449.5	7280.3	7074.7	7131.4	6984	7114.4	8237.5	6792.3	7991.2	6875	6449.5	7280.3	7074.7	7131.4	6984	7114.4	8237.5	6792.3	7991.2	High	High	High	High
-2.81875e+17	FALSE	High	IsMasterProtein	TGGT1_254520-t26_1-p1	transcript=TGGT1_254520-t26_1 | gene=TGGT1_254520 | organism=Toxoplasma_gondii_GT1 | gene_product=Mediator complex subunit MED11 [Source:UniProtKB/TrEMBL;Acc:A0A125YY51] | transcript_product=mediator complex subunit MED11 | location=TGGT1_chrIII:1782437-1785137(+) | protein_length=153 | sequence_SO=chromosome | SO=protein_coding_gene | is_pseudo=false	0	75.65	59	8	41	8	153	16.4	9.31	169.89	8	0.938	1.095	1.08	1.045	1.108	1.105	0.834	1.043	1.163	8149.9	7646.4	8925.8	8798	8516.1	9032.6	9006.9	6797.4	8498.5	9482.3	8149.9	7646.4	8925.8	8798	8516.1	9032.6	9006.9	6797.4	8498.5	9482.3	High	High	High	High
-1.76158e+18	FALSE	High	IsMasterProtein	TGGT1_264710-t26_1-p1	transcript=TGGT1_264710-t26_1 | gene=TGGT1_264710 | organism=Toxoplasma_gondii_GT1 | gene_product=BCNT-C domain-containing protein [Source:UniProtKB/TrEMBL;Acc:S7VP80] | transcript_product=bucentaur or craniofacial development domain-containing protein | location=TGGT1_chrIX:1916751-1921917(+) | protein_length=451 | sequence_SO=chromosome | SO=protein_coding_gene | is_pseudo=false	0	10.703	5	2	3	2	451	49.6	6.35	9.92	2	0.939	0.991	1.012	1.031	1.013	1.043	0.968	0.991	1.056	794.4	745.7	787.2	804.1	819.4	804.5	828.7	768.8	787.2	839.2	794.4	745.7	787.2	804.1	819.4	804.5	828.7	768.8	787.2	839.2	High	High	High	High
-4.7718e+18	FALSE	High	IsMasterProtein	TGGT1_288570-t26_1-p1	transcript=TGGT1_288570-t26_1 | gene=TGGT1_288570 | organism=Toxoplasma_gondii_GT1 | gene_product=hypothetical protein | transcript_product=hypothetical protein | location=TGGT1_chrIX:2433882-2435903(-) | protein_length=417 | sequence_SO=chromosome | SO=protein_coding_gene | is_pseudo=false	0	7.408	3	1	1	1	417	44.9	8.07	4.01	1	0.939	0.866	0.948	0.937	0.917	0.866	0.975	0.933	0.42	294.7	276.7	255.1	279.5	276.2	270.2	255.3	287.3	274.9	123.6	294.7	276.7	255.1	279.5	276.2	270.2	255.3	287.3	274.9	123.6	High	High	High	High
-4.04047e+18	FALSE	Medium	IsMasterProtein	TGGT1_293190-t26_1-p1	transcript=TGGT1_293190-t26_1 | gene=TGGT1_293190 | organism=Toxoplasma_gondii_GT1 | gene_product=IPPc domain-containing protein [Source:UniProtKB/TrEMBL;Acc:A0A125YFF1] | transcript_product=endonuclease/exonuclease/phosphatase family protein | location=TGGT1_chrIa:133494-141236(+) | protein_length=682 | sequence_SO=chromosome | SO=protein_coding_gene | is_pseudo=false	0.011	2.12	1	1	1	1	682	76.2	5.47	2.47	1	0.939	1.05	1.03	0.981	0.996	1.076	1.076	0.927	0.964	296.9	278.8	311.8	305.8	291.1	295.6	319.5	319.4	275.2	286.4	296.9	278.8	311.8	305.8	291.1	295.6	319.5	319.4	275.2	286.4	High	High	High	High
-5.55998e+18	FALSE	High	IsMasterProtein	TGGT1_306195-t26_1-p1	transcript=TGGT1_306195-t26_1 | gene=TGGT1_306195 | organism=Toxoplasma_gondii_GT1 | gene_product=hypothetical protein | transcript_product=hypothetical protein | location=TGGT1_chrIX:5606455-5607689(-) | protein_length=236 | sequence_SO=chromosome | SO=protein_coding_gene | is_pseudo=false	0.008	2.228	4	1	1	1	236	25.6	9.77	2.64	1	0.939	0.967	1.011	1.064	1.028	1.019	1.041	0.984	0.863	585.9	550.4	566.5	592.6	623.4	602.3	597.2	610.2	576.6	505.5	585.9	550.4	566.5	592.6	623.4	602.3	597.2	610.2	576.6	505.5	High	High	High	High
2.06991e+18	FALSE	High	IsMasterProtein	TGGT1_229630-t26_1-p1	transcript=TGGT1_229630-t26_1 | gene=TGGT1_229630 | organism=Toxoplasma_gondii_GT1 | gene_product=Protein kinase domain-containing protein [Source:UniProtKB/TrEMBL;Acc:S7V372] | transcript_product=eIF2 kinase IF2K-A (incomplete catalytic triad) | location=TGGT1_chrVIII:323939-342025(+) | protein_length=4638 | sequence_SO=chromosome | SO=protein_coding_gene | is_pseudo=false	0	6.019	0	2	2	2	4638	492.8	8.02	4.89	2	0.939	0.931	0.996	1.035	0.946	1.049	1.002	1.005	0.971	219	205.7	203.9	218.2	226.7	207.1	229.7	219.4	220.2	212.7	219	205.7	203.9	218.2	226.7	207.1	229.7	219.4	220.2	212.7	High	High	High	High
-4.38507e+18	FALSE	High	IsMasterProtein	TGGT1_260670-t26_1-p1	transcript=TGGT1_260670-t26_1 | gene=TGGT1_260670 | organism=Toxoplasma_gondii_GT1 | gene_product=Putative centrin [Source:UniProtKB/TrEMBL;Acc:S7W7A1] | transcript_product=putative centrin | location=TGGT1_chrVIIb:2043964-2046959(-) | protein_length=238 | sequence_SO=chromosome | SO=protein_coding_gene | is_pseudo=false	0	19.087	17	4	11	4	238	26.6	6.42	31.18	4	0.939	1.026	1.003	0.977	1.016	1.011	0.841	0.903	0.895	3328.8	3127.4	3415	3339.2	3253.3	3382	3365.6	2798.6	3004.3	2980.9	3328.8	3127.4	3415	3339.2	3253.3	3382	3365.6	2798.6	3004.3	2980.9	High	High	High	High
-1.61245e+18	FALSE	High	IsMasterProtein	TGGT1_268980-t26_1-p1	transcript=TGGT1_268980-t26_1 | gene=TGGT1_268980 | organism=Toxoplasma_gondii_GT1 | gene_product=hypothetical protein | transcript_product=hypothetical protein | location=TGGT1_chrVIII:6168360-6169294(-) | protein_length=185 | sequence_SO=chromosome | SO=protein_coding_gene | is_pseudo=false	0	12.346	15	2	4	2	185	19.9	9.52	13.6	2	0.94	1.004	1.005	1	1.011	0.985	0.9	0.874	0.906	721.6	677.9	724.3	725.5	721.5	729.6	710.8	649.3	630.7	653.6	721.6	677.9	724.3	725.5	721.5	729.6	710.8	649.3	630.7	653.6	High	High	High	High
-6.94485e+18	FALSE	High	IsMasterProtein	TGGT1_287040-t26_1-p1	transcript=TGGT1_287040-t26_1 | gene=TGGT1_287040 | organism=Toxoplasma_gondii_GT1 | gene_product=hypothetical protein | transcript_product=hypothetical protein | location=TGGT1_chrV:1431859-1433429(+) | protein_length=336 | sequence_SO=chromosome | SO=protein_coding_gene | is_pseudo=false	0.001	4.147	3	1	3	1	336	35	4.23	8.28	1	0.94	1.146	1.077	1.063	1.047	1.09	1.028	0.974	0.98	318.3	299.2	364.7	343	338.4	333.2	347	327.1	310	312.1	318.3	299.2	364.7	343	338.4	333.2	347	327.1	310	312.1	High	High	High	High
5.23114e+17	FALSE	High	IsMasterProtein	TGGT1_270690-t26_1-p1	transcript=TGGT1_270690-t26_1 | gene=TGGT1_270690 | organism=Toxoplasma_gondii_GT1 | gene_product=Arginyl-tRNA synthetase [Source:UniProtKB/TrEMBL;Acc:A0A125YS10] | transcript_product=arginyl-tRNA synthetase | location=TGGT1_chrVIII:5067864-5080628(-) | protein_length=1174 | sequence_SO=chromosome | SO=protein_coding_gene | is_pseudo=false	0	9.499	2	1	1	1	1174	130.2	6.58	7.97	1	0.94	0.979	0.918	1.24	1.08	1.081	0.966	0.837	1.393	26.2	24.6	25.7	24.1	32.5	28.3	28.3	25.3	21.9	36.5	26.2	24.6	25.7	24.1	32.5	28.3	28.3	25.3	21.9	36.5	High	High	High	High
-4.23354e+18	FALSE	High	IsMasterProtein	TGGT1_289600-t26_1-p1	transcript=TGGT1_289600-t26_1 | gene=TGGT1_289600 | organism=Toxoplasma_gondii_GT1 | gene_product=SHSP domain-containing protein [Source:UniProtKB/TrEMBL;Acc:A0A125YQI3] | transcript_product=heat shock protein HSP29 | location=TGGT1_chrIX:3148428-3149703(-) | protein_length=272 | sequence_SO=chromosome | SO=protein_coding_gene | is_pseudo=false	0	134.785	61	18	57	18	272	29.6	5.77	208.45	18	0.94	1.006	1.004	0.958	1.004	1.003	0.909	0.927	0.901	26182.4	24614.4	26343.2	26297	25072.2	26274.3	26267.2	23788.6	24265.5	23589.9	26182.4	24614.4	26343.2	26297	25072.2	26274.3	26267.2	23788.6	24265.5	23589.9	High	High	High	High
-2.53011e+18	FALSE	High	IsMasterProtein	TGGT1_309050-t26_1-p1	transcript=TGGT1_309050-t26_1 | gene=TGGT1_309050 | organism=Toxoplasma_gondii_GT1 | gene_product=hypothetical protein | transcript_product=hypothetical protein | location=TGGT1_chrXI:423266-426389(-) | protein_length=784 | sequence_SO=chromosome | SO=protein_coding_gene | is_pseudo=false	0	30.529	11	5	6	5	784	82.7	5.25	27.03	5	0.94	1.03	1.054	1.055	1.096	1.151	1.042	1.117	1.058	318.6	299.6	328.2	335.7	336.2	349.2	366.8	331.9	355.7	337.2	318.6	299.6	328.2	335.7	336.2	349.2	366.8	331.9	355.7	337.2	High	High	High	High
-1.97239e+18	FALSE	High	IsMasterProtein	TGGT1_232260-t26_1-p1	transcript=TGGT1_232260-t26_1 | gene=TGGT1_232260 | organism=Toxoplasma_gondii_GT1 | gene_product=hypothetical protein | transcript_product=hypothetical protein | location=TGGT1_chrVIII:1978812-1980484(-) | protein_length=306 | sequence_SO=chromosome | SO=protein_coding_gene | is_pseudo=false	0	10.395	9	2	2	2	306	32.3	7.96	8.07	2	0.941	1.007	0.977	1.077	1.143	1.181	1.188	1.119	1.277	249.3	234.5	251.1	243.5	268.6	285	294.3	296.2	279.1	318.3	249.3	234.5	251.1	243.5	268.6	285	294.3	296.2	279.1	318.3	High	High	High	High
-3.32906e+18	FALSE	High	IsMasterProtein	TGGT1_316310-t26_1-p1	transcript=TGGT1_316310-t26_1 | gene=TGGT1_316310 | organism=Toxoplasma_gondii_GT1 | gene_product=Superoxide dismutase [Source:UniProtKB/TrEMBL;Acc:A0A125YQN9] | transcript_product=superoxide dismutase | location=TGGT1_chrXI:5175968-5177674(-) | protein_length=201 | sequence_SO=chromosome | SO=protein_coding_gene | is_pseudo=false	0	147.346	65	14	145	14	201	22.5	7.06	512.87	14	0.941	1.083	1.038	0.956	1.019	1.021	0.781	0.943	0.985	47410.5	44604.6	51358	49199.7	45311.5	48317.2	48384.8	37019.9	44721	46721	47410.5	44604.6	51358	49199.7	45311.5	48317.2	48384.8	37019.9	44721	46721	High	High	High	High
-2.5902e+18	FALSE	High	IsMasterProtein	TGGT1_220140-t26_1-p1	transcript=TGGT1_220140-t26_1 | gene=TGGT1_220140 | organism=Toxoplasma_gondii_GT1 | gene_product=EF hand domain-containing protein [Source:UniProtKB/TrEMBL;Acc:S7UGW6] | transcript_product=EF hand domain-containing protein | location=TGGT1_chrV:62947-64752(+) | protein_length=244 | sequence_SO=chromosome | SO=protein_coding_gene | is_pseudo=false	0	10.303	12	3	3	3	244	25.9	5.01	9.48	3	0.941	1.069	0.999	1.013	1.02	1.009	0.94	0.967	0.972	1142.4	1075	1220.6	1141.7	1157.5	1165.1	1153	1073.5	1104.9	1110.7	1142.4	1075	1220.6	1141.7	1157.5	1165.1	1153	1073.5	1104.9	1110.7	High	High	High	High
-6.87443e+17	FALSE	High	IsMasterProtein	TGGT1_315750-t26_1-p1	transcript=TGGT1_315750-t26_1 | gene=TGGT1_315750 | organism=Toxoplasma_gondii_GT1 | gene_product=hypothetical protein | transcript_product=hypothetical protein | location=TGGT1_chrXI:4888664-4890249(-) | protein_length=231 | sequence_SO=chromosome | SO=protein_coding_gene | is_pseudo=false	0	16.959	21	5	7	5	231	25.7	5.14	21.23	5	0.941	1.122	1.095	1.123	1.029	1.065	0.999	0.98	1.07	1946.7	1832.2	2185.2	2131.6	2186	2002.5	2074.2	1944.4	1907.7	2083	1946.7	1832.2	2185.2	2131.6	2186	2002.5	2074.2	1944.4	1907.7	2083	High	High	High	High
1.88885e+18	FALSE	High	IsMasterProtein	TGGT1_258770-t26_1-p1	transcript=TGGT1_258770-t26_1 | gene=TGGT1_258770 | organism=Toxoplasma_gondii_GT1 | gene_product=Ricin B-type lectin domain-containing protein [Source:UniProtKB/TrEMBL;Acc:A0A125YL07] | transcript_product=putative polypeptide n-acetylgalactosaminyltransferase 12 | location=TGGT1_chrVIIb:3160046-3167254(+) | protein_length=692 | sequence_SO=chromosome | SO=protein_coding_gene | is_pseudo=false	0.001	4.289	2	1	2	1	692	78.9	7.46	5.74	1	0.941	0.926	0.742	0.837	0.742	0.662	0.968	0.799	0.98	46.6	43.9	43.2	34.6	39	34.6	30.9	45.2	37.3	45.7	46.6	43.9	43.2	34.6	39	34.6	30.9	45.2	37.3	45.7	High	High	High	High
8.50065e+18	FALSE	High	IsMasterProtein	TGGT1_210408-t26_1-p1	transcript=TGGT1_210408-t26_1 | gene=TGGT1_210408 | organism=Toxoplasma_gondii_GT1 | gene_product=HMG box domain-containing protein [Source:UniProtKB/TrEMBL;Acc:S7UPQ8] | transcript_product=HMG (high mobility group) box domain-containing protein | location=TGGT1_chrIX:4609915-4610199(+) | protein_length=94 | sequence_SO=chromosome | SO=protein_coding_gene | is_pseudo=false	0	30.281	62	10	101	9	94	10.7	10.1	210.35	10	0.942	0.993	0.981	0.952	0.98	1.007	0.869	0.929	0.903	35125.3	33073	34877	34458.5	33448.1	34428.3	35355.9	30535.3	32641.3	31724.5	35125.3	33073	34877	34458.5	33448.1	34428.3	35355.9	30535.3	32641.3	31724.5	High	High	High	High
5.38282e+18	FALSE	High	IsMasterProtein	TGGT1_306600-t26_1-p1	transcript=TGGT1_306600-t26_1 | gene=TGGT1_306600 | organism=Toxoplasma_gondii_GT1 | gene_product=RRM domain-containing protein [Source:UniProtKB/TrEMBL;Acc:A0A125YLJ1] | transcript_product=RNA recognition motif-containing protein | location=TGGT1_chrIX:5986467-5988759(-) | protein_length=189 | sequence_SO=chromosome | SO=protein_coding_gene | is_pseudo=false	0	8.291	11	2	4	2	189	21.2	11.3	14.08	2	0.942	0.987	1.003	0.936	0.948	0.981	0.884	0.893	0.523	1746	1644.7	1722.7	1751.6	1633.4	1655.2	1712	1542.8	1558.4	913.4	1746	1644.7	1722.7	1751.6	1633.4	1655.2	1712	1542.8	1558.4	913.4	High	High	High	High
-8.58853e+18	FALSE	High	IsMasterProtein	TGGT1_251550-t26_1-p1	transcript=TGGT1_251550-t26_1 | gene=TGGT1_251550 | organism=Toxoplasma_gondii_GT1 | gene_product=ACB domain-containing protein [Source:UniProtKB/TrEMBL;Acc:A0A125YSH3] | transcript_product=acyl-coa-binding protein | location=TGGT1_chrXII:5375924-5376869(-) | protein_length=95 | sequence_SO=chromosome | SO=protein_coding_gene | is_pseudo=false	0.001	5.486	12	1	2	1	95	10.8	8.07	8.21	1	0.942	1.078	1.099	1.052	1.142	1.144	0.847	1.041	1.075	893	841.3	962.3	981.6	939.9	1019.8	1021.3	755.9	930	959.8	893	841.3	962.3	981.6	939.9	1019.8	1021.3	755.9	930	959.8	High	High	High	High
1.21619e+17	FALSE	High	IsMasterProtein	TGGT1_258940-t26_1-p1	transcript=TGGT1_258940-t26_1 | gene=TGGT1_258940 | organism=Toxoplasma_gondii_GT1 | gene_product=Acylphosphatase [Source:UniProtKB/TrEMBL;Acc:A0A125YRH8] | transcript_product=acylphosphatase family protein | location=TGGT1_chrVIIb:3046946-3047287(-) | protein_length=113 | sequence_SO=chromosome | SO=protein_coding_gene | is_pseudo=false	0	18.709	33	3	9	3	113	12.5	8.85	32.61	3	0.942	0.952	0.966	0.957	0.999	1.033	0.921	0.957	0.901	2151.8	2027.6	2049	2079.2	2059.5	2149.9	2223.2	1982.9	2059.5	1938.2	2151.8	2027.6	2049	2079.2	2059.5	2149.9	2223.2	1982.9	2059.5	1938.2	High	High	High	High
-2.68248e+18	FALSE	High	IsMasterProtein	TGGT1_257070-t26_1-p1	transcript=TGGT1_257070-t26_1 | gene=TGGT1_257070 | organism=Toxoplasma_gondii_GT1 | gene_product=hypothetical protein | transcript_product=hypothetical protein | location=TGGT1_chrVIIb:4176004-4180213(-) | protein_length=484 | sequence_SO=chromosome | SO=protein_coding_gene | is_pseudo=false	0	34.279	14	7	10	7	484	49.9	9.79	36.67	7	0.942	1.055	1.069	1.061	1.09	1.099	1.014	1.022	1.059	3650.2	3439.9	3850	3903.8	3873.4	3980.3	4010.9	3702.3	3729.3	3865.5	3650.2	3439.9	3850	3903.8	3873.4	3980.3	4010.9	3702.3	3729.3	3865.5	High	High	High	High
6.97131e+18	FALSE	High	IsMasterProtein	TGGT1_214940-t26_1-p1	transcript=TGGT1_214940-t26_1 | gene=TGGT1_214940 | organism=Toxoplasma_gondii_GT1 | gene_product=MIC2-associated protein M2AP [Source:UniProtKB/TrEMBL;Acc:A0A125YM06] | transcript_product=MIC2-associated protein M2AP | location=TGGT1_chrX:6494811-6496996(+) | protein_length=330 | sequence_SO=chromosome | SO=protein_coding_gene | is_pseudo=false	0	151.993	34	10	139	10	330	34.6	4.39	595.61	10	0.942	1.106	1.072	1.01	1.056	1.034	0.94	1.008	1.035	40033	37726.8	44268.8	42904.4	40440.7	42283.8	41377.7	37634	40349.3	41441.7	40033	37726.8	44268.8	42904.4	40440.7	42283.8	41377.7	37634	40349.3	41441.7	High	High	High	High
-4.37179e+18	FALSE	High	IsMasterProtein	TGGT1_228360-t26_1-p1	transcript=TGGT1_228360-t26_1 | gene=TGGT1_228360 | organism=Toxoplasma_gondii_GT1 | gene_product=Peptidylprolyl isomerase [Source:UniProtKB/TrEMBL;Acc:S7UXV4] | transcript_product=putative peptidyl-prolyl isomerase FKBP12 | location=TGGT1_chrX:286110-288045(+) | protein_length=362 | sequence_SO=chromosome | SO=protein_coding_gene | is_pseudo=false	0	38.633	26	5	10	5	362	38.2	9.38	55.13	5	0.943	0.76	1.018	1.067	1.095	1.232	1.078	0.933	0.949	1642.4	1548	1247.6	1672.6	1752.4	1798.8	2023.1	1770.9	1532.2	1559.3	1642.4	1548	1247.6	1672.6	1752.4	1798.8	2023.1	1770.9	1532.2	1559.3	High	High	High	High
8.69773e+17	FALSE	High	IsMasterProtein	TGGT1_279400-t26_1-p1	transcript=TGGT1_279400-t26_1 | gene=TGGT1_279400 | organism=Toxoplasma_gondii_GT1 | gene_product=Glutaredoxin domain-containing protein [Source:UniProtKB/TrEMBL;Acc:S7VQ27] | transcript_product=putative glutaredoxin | location=TGGT1_chrIX:38768-40339(+) | protein_length=146 | sequence_SO=chromosome | SO=protein_coding_gene | is_pseudo=false	0	36.056	29	6	21	6	146	16.2	9.01	77.69	6	0.943	0.998	1.046	1.02	1.062	1.084	0.87	1.011	1.045	11392.9	10738.9	11369.7	11915.2	11621.3	12095.4	12348.3	9912.6	11519.9	11902.6	11392.9	10738.9	11369.7	11915.2	11621.3	12095.4	12348.3	9912.6	11519.9	11902.6	High	High	High	High
-6.57994e+17	FALSE	High	IsMasterProtein	TGGT1_301410-t26_1-p1	transcript=TGGT1_301410-t26_1 | gene=TGGT1_301410 | organism=Toxoplasma_gondii_GT1 | gene_product=hypothetical protein | transcript_product=hypothetical protein | location=TGGT1_chrIV:2344797-2350279(+) | protein_length=1033 | sequence_SO=chromosome | SO=protein_coding_gene | is_pseudo=false	0	13.84	4	3	3	3	1033	106.2	7.2	12.16	3	0.943	0.849	1.017	1.037	1.117	1.002	1.07	0.874	0.882	129.9	122.4	110.2	132.2	134.6	145.1	130.1	139	113.5	114.6	129.9	122.4	110.2	132.2	134.6	145.1	130.1	139	113.5	114.6	High	High	High	High
7.17784e+18	FALSE	High	IsMasterProtein	TGGT1_263990-t26_1-p1	transcript=TGGT1_263990-t26_1 | gene=TGGT1_263990 | organism=Toxoplasma_gondii_GT1 | gene_product=hypothetical protein | transcript_product=hypothetical protein | location=TGGT1_chrVIIb:226389-227659(-) | protein_length=134 | sequence_SO=chromosome | SO=protein_coding_gene | is_pseudo=false	0	20.007	34	5	17	5	134	15.4	7.99	46.7	5	0.943	0.98	1.034	1.036	1.085	1.095	0.663	1.026	1.22	3937	3711.2	3858.7	4072.3	4080.5	4272.5	4309	2609.9	4037.9	4803	3937	3711.2	3858.7	4072.3	4080.5	4272.5	4309	2609.9	4037.9	4803	High	High	High	High
2.99627e+18	FALSE	High	IsMasterProtein	TGGT1_272770-t26_1-p1	transcript=TGGT1_272770-t26_1 | gene=TGGT1_272770 | organism=Toxoplasma_gondii_GT1 | gene_product=hypothetical protein | transcript_product=hypothetical protein | location=TGGT1_chrVIII:3732907-3743449(+) | protein_length=697 | sequence_SO=chromosome | SO=protein_coding_gene | is_pseudo=false	0	42.152	10	4	7	4	697	78.2	4.86	27.94	4	0.943	0.884	0.975	1.031	0.937	0.983	0.959	0.901	0.906	539.8	508.9	477.2	526.5	556.4	505.8	530.8	517.5	486.3	489.1	539.8	508.9	477.2	526.5	556.4	505.8	530.8	517.5	486.3	489.1	High	High	High	High
1.59926e+18	FALSE	High	IsMasterProtein	TGGT1_315610-t26_1-p1	transcript=TGGT1_315610-t26_1 | gene=TGGT1_315610 | organism=Toxoplasma_gondii_GT1 | gene_product=hypothetical protein | transcript_product=hypothetical protein | location=TGGT1_chrXI:4798811-4799287(+) | protein_length=158 | sequence_SO=chromosome | SO=protein_coding_gene | is_pseudo=false	0	25.409	25	6	30	6	158	16	11.78	75.14	6	0.943	1.032	1.012	0.99	0.985	0.999	0.977	0.949	0.637	8375.5	7898.9	8645.2	8479.4	8290.5	8249.2	8367.4	8185.6	7945.3	5335.5	8375.5	7898.9	8645.2	8479.4	8290.5	8249.2	8367.4	8185.6	7945.3	5335.5	High	High	High	High
-1.46852e+16	FALSE	High	IsMasterProtein	TGGT1_251810-t26_1-p1	transcript=TGGT1_251810-t26_1 | gene=TGGT1_251810 | organism=Toxoplasma_gondii_GT1 | gene_product=Eukaryotic translation initiation factor 5A [Source:UniProtKB/TrEMBL;Acc:A0A125YIS3] | transcript_product=putative translation initiation factor eIF-5A | location=TGGT1_chrXII:5518720-5519205(-) | protein_length=161 | sequence_SO=chromosome | SO=protein_coding_gene | is_pseudo=false	0	188.923	68	13	140	13	161	17.5	5.39	572.9	13	0.943	1.124	1.078	0.997	1.065	1.071	0.974	0.986	1.054	45857.1	43257	51562.3	49444	45722.3	48846	49130.2	44658.7	45233.4	48340.4	45857.1	43257	51562.3	49444	45722.3	48846	49130.2	44658.7	45233.4	48340.4	High	High	High	High
-9.9991e+17	FALSE	High	IsMasterProtein	TGGT1_205720-t26_1-p1	transcript=TGGT1_205720-t26_1 | gene=TGGT1_205720 | organism=Toxoplasma_gondii_GT1 | gene_product=A_deaminase domain-containing protein [Source:UniProtKB/TrEMBL;Acc:A0A125YQL8] | transcript_product=Adenosine/AMP deaminase domain-containing protein | location=TGGT1_chrVIIa:1110639-1113876(-) | protein_length=366 | sequence_SO=chromosome | SO=protein_coding_gene | is_pseudo=false	0.001	4.872	4	2	2	2	366	41.1	5.53	5.32	2	0.943	0.943	0.979	0.993	0.981	0.96	0.902	0.943	0.922	614.4	579.6	579.1	601.4	610.2	602.6	589.5	554	579.6	566.6	614.4	579.6	579.1	601.4	610.2	602.6	589.5	554	579.6	566.6	High	High	High	High
3.40755e+18	FALSE	High	IsMasterProtein	TGGT1_291930-t26_1-p1	transcript=TGGT1_291930-t26_1 | gene=TGGT1_291930 | organism=Toxoplasma_gondii_GT1 | gene_product=RNA recognition motif-containing protein [Source:UniProtKB/TrEMBL;Acc:S7W432] | transcript_product=RNA recognition motif-containing protein | location=TGGT1_chrIX:4212023-4217780(+) | protein_length=705 | sequence_SO=chromosome | SO=protein_coding_gene | is_pseudo=false	0	204.402	33	26	135	26	705	73.1	5.43	524.27	26	0.944	1.001	1.017	1	1.014	1.043	0.987	0.961	0.335	51104.6	48221.3	51132.3	51952.6	51087.9	51838.7	53289.4	50441.5	49106.6	17120.3	51104.6	48221.3	51132.3	51952.6	51087.9	51838.7	53289.4	50441.5	49106.6	17120.3	High	High	High	High
1.86558e+18	FALSE	High	IsMasterProtein	TGGT1_273350-t26_1-p1	transcript=TGGT1_273350-t26_1 | gene=TGGT1_273350 | organism=Toxoplasma_gondii_GT1 | gene_product=Molybdopterin converting factor, subunit 2 protein [Source:UniProtKB/TrEMBL;Acc:S7WCD7] | transcript_product=molybdopterin converting factor, subunit 2 protein | location=TGGT1_chrVIII:3576639-3578667(+) | protein_length=489 | sequence_SO=chromosome | SO=protein_coding_gene | is_pseudo=false	0.006	2.45	2	1	2	1	489	52.5	6.34	4.18	1	0.944	0.919	0.94	0.985	0.878	0.911	0.866	0.774	0.871	66.7	62.9	61.2	62.7	65.7	58.6	60.7	57.7	51.6	58.1	66.7	62.9	61.2	62.7	65.7	58.6	60.7	57.7	51.6	58.1	High	High	High	High
-1.79919e+18	FALSE	High	IsMasterProtein	TGGT1_311260-t26_1-p1	transcript=TGGT1_311260-t26_1 | gene=TGGT1_311260 | organism=Toxoplasma_gondii_GT1 | gene_product=EF-hand domain-containing protein [Source:UniProtKB/TrEMBL;Acc:A0A125YRC4] | transcript_product=putative myosin light chain MLC1 | location=TGGT1_chrXI:1892320-1893145(+) | protein_length=137 | sequence_SO=chromosome | SO=protein_coding_gene | is_pseudo=false	0.002	4.045	7	1	3	1	137	14.3	4.7	8.58	1	0.944	0.938	0.986	1.046	1.043	1.055	0.739	0.961	0.976	1627	1535.5	1526.6	1604.9	1701.1	1696.9	1716.2	1202.4	1564.1	1588.3	1627	1535.5	1526.6	1604.9	1701.1	1696.9	1716.2	1202.4	1564.1	1588.3	High	High	High	High
4.71699e+18	FALSE	High	IsMasterProtein	TGGT1_249240-t26_1-p1	transcript=TGGT1_249240-t26_1 | gene=TGGT1_249240 | organism=Toxoplasma_gondii_GT1 | gene_product=Calmodulin [Source:UniProtKB/TrEMBL;Acc:A0A125YS28] | transcript_product=putative calmodulin | location=TGGT1_chrXII:4324350-4325995(-) | protein_length=149 | sequence_SO=chromosome | SO=protein_coding_gene | is_pseudo=false	0	97.117	56	10	212	10	149	16.8	4.22	851.41	10	0.944	1.017	1.063	0.993	1.011	0.983	0.622	0.564	0.513	61378.2	57928.6	62443.6	65266.9	60955	62081.5	60306.5	38172.1	34633	31483.4	61378.2	57928.6	62443.6	65266.9	60955	62081.5	60306.5	38172.1	34633	31483.4	High	High	High	High
6.16967e+18	FALSE	High	IsMasterProtein	TGGT1_289290-t26_1-p1	transcript=TGGT1_289290-t26_1 | gene=TGGT1_289290 | organism=Toxoplasma_gondii_GT1 | gene_product=hypothetical protein | transcript_product=hypothetical protein | location=TGGT1_chrIX:2957612-2961198(-) | protein_length=510 | sequence_SO=chromosome | SO=protein_coding_gene | is_pseudo=false	0	41.86	22	10	15	10	510	55.4	8.87	48.85	10	0.944	0.995	1.001	1.021	1.008	1.027	0.927	0.94	0.569	4700.5	4436.8	4678.1	4706.7	4797.8	4739.2	4827.9	4356.9	4418.4	2673.3	4700.5	4436.8	4678.1	4706.7	4797.8	4739.2	4827.9	4356.9	4418.4	2673.3	High	High	High	High
5.44143e+18	FALSE	High	IsMasterProtein	TGGT1_301180-t26_1-p1	transcript=TGGT1_301180-t26_1 | gene=TGGT1_301180 | organism=Toxoplasma_gondii_GT1 | gene_product=SAG-related sequence SRS19F [Source:UniProtKB/TrEMBL;Acc:S7VPV0] | transcript_product=SAG-related sequence SRS19F | location=TGGT1_chrIV:2185215-2186390(-) | protein_length=391 | sequence_SO=chromosome | SO=protein_coding_gene | is_pseudo=false	0	77.675	39	15	44	10	391	40.9	6.55	145.95	15	0.944	0.998	0.997	0.991	1.004	1.024	0.911	0.952	0.94	14222	13426	14199	14174.1	14092.8	14285.2	14557.9	12951.2	13542.9	13365.8	14222	13426	14199	14174.1	14092.8	14285.2	14557.9	12951.2	13542.9	13365.8	High	High	High	High
8.71895e+18	FALSE	High	IsMasterProtein	TGGT1_221922-t26_1-p1	transcript=TGGT1_221922-t26_1 | gene=TGGT1_221922 | organism=Toxoplasma_gondii_GT1 | gene_product=NifU domain-containing protein [Source:UniProtKB/TrEMBL;Acc:S7ULE4] | transcript_product=NifU family domain-containing protein | location=TGGT1_chrII:679360-682896(+) | protein_length=483 | sequence_SO=chromosome | SO=protein_coding_gene | is_pseudo=false	0	12.978	8	3	4	3	483	51.8	5.68	11.91	3	0.944	1.02	1.075	1.054	1.115	1.171	1.068	1.148	1.163	534.1	504.2	544.9	574.1	562.8	595.7	625.4	570.6	613.3	621.1	534.1	504.2	544.9	574.1	562.8	595.7	625.4	570.6	613.3	621.1	High	High	High	High
-1.44564e+18	FALSE	Medium	IsMasterProtein	TGGT1_305610-t26_1-p1	transcript=TGGT1_305610-t26_1 | gene=TGGT1_305610 | organism=Toxoplasma_gondii_GT1 | gene_product=hypothetical protein | transcript_product=hypothetical protein | location=TGGT1_chrIX:5280437-5285939(-) | protein_length=481 | sequence_SO=chromosome | SO=protein_coding_gene | is_pseudo=false	0.015	1.78	1	1	1	1	481	52	5.38	2.04	1	0.944	1.105	1.012	1.028	0.985	0.95	0.988	1.034	0.999	345.7	326.4	381.9	350	355.4	340.4	328.5	341.5	357.6	345.2	345.7	326.4	381.9	350	355.4	340.4	328.5	341.5	357.6	345.2	High	High	High	High
-6734595257302100	FALSE	High	IsMasterProtein	TGGT1_217010-t26_1-p1	transcript=TGGT1_217010-t26_1 | gene=TGGT1_217010 | organism=Toxoplasma_gondii_GT1 | gene_product=GYF domain-containing protein [Source:UniProtKB/TrEMBL;Acc:S7W0V5] | transcript_product=hypothetical protein | location=TGGT1_chrXI:5644864-5649332(-) | protein_length=572 | sequence_SO=chromosome | SO=protein_coding_gene | is_pseudo=false	0	30.452	14	7	10	7	572	65	4.82	26.9	7	0.944	1.014	0.986	1.004	1.007	1.016	0.977	0.933	0.954	2521.1	2381	2555.3	2486.5	2531.4	2539.7	2560.4	2463.1	2351.7	2406.1	2521.1	2381	2555.3	2486.5	2531.4	2539.7	2560.4	2463.1	2351.7	2406.1	High	High	High	High
8.35421e+18	FALSE	High	IsMasterProtein	TGGT1_215600-t26_1-p1	transcript=TGGT1_215600-t26_1 | gene=TGGT1_215600 | organism=Toxoplasma_gondii_GT1 | gene_product=hypothetical protein | transcript_product=hypothetical protein | location=TGGT1_chrX:6935886-6937960(+) | protein_length=329 | sequence_SO=chromosome | SO=protein_coding_gene | is_pseudo=false	0.001	5.295	3	1	1	1	329	34.1	4.61	3.64	1	0.945	0.973	0.989	1.135	1.087	1.02	0.994	0.985	1.017	221.5	209.2	215.5	219	251.4	240.7	225.8	220.2	218.2	225.3	221.5	209.2	215.5	219	251.4	240.7	225.8	220.2	218.2	225.3	High	High	High	High
2.41664e+18	FALSE	High	IsMasterProtein	TGGT1_212410-t26_1-p1	transcript=TGGT1_212410-t26_1 | gene=TGGT1_212410 | organism=Toxoplasma_gondii_GT1 | gene_product=Dense granule protein GRA11 [Source:UniProtKB/TrEMBL;Acc:S7UG79] | transcript_product=dense granule protein GRA11 | location=AAQM03000406:691-2823(-) | protein_length=710 | sequence_SO=contig | SO=protein_coding_gene | is_pseudo=false	0	34.224	10	4	7	4	710	75.5	4.06	31.89	4	0.945	1.011	0.955	1.019	1.004	1.043	0.948	1.016	0.974	405.4	383	410	387.3	413	407	422.8	384.5	411.9	395.1	405.4	383	410	387.3	413	407	422.8	384.5	411.9	395.1	High	High	High	High
3.7463e+18	FALSE	High	IsMasterProtein	TGGT1_247520-t26_1-p1	transcript=TGGT1_247520-t26_1 | gene=TGGT1_247520 | organism=Toxoplasma_gondii_GT1 | gene_product=hypothetical protein | transcript_product=hypothetical protein | location=TGGT1_chrXII:3323216-3323986(-) | protein_length=256 | sequence_SO=chromosome | SO=protein_coding_gene | is_pseudo=false	0	52.25	29	6	81	6	256	26.3	11.06	316.32	6	0.945	1.012	1.03	1.003	1.034	1.07	0.712	0.966	0.988	31341.6	29609.2	31703.6	32285.8	31448.8	32407.2	33531.4	22301.8	30265.2	30969.2	31341.6	29609.2	31703.6	32285.8	31448.8	32407.2	33531.4	22301.8	30265.2	30969.2	High	High	High	High
6.66709e+18	FALSE	High	IsMasterProtein	TGGT1_233230-t26_1-p1	transcript=TGGT1_233230-t26_1 | gene=TGGT1_233230 | organism=Toxoplasma_gondii_GT1 | gene_product=RRM domain-containing protein [Source:UniProtKB/TrEMBL;Acc:S7V3Q8] | transcript_product=RNA-binding protein 8A family protein | location=TGGT1_chrVIII:2518761-2521941(+) | protein_length=162 | sequence_SO=chromosome | SO=protein_coding_gene | is_pseudo=false	0	39.104	49	6	21	6	162	18.4	6.83	81.94	6	0.945	1.004	1.038	1.008	1.065	1.053	0.984	0.961	0.96	4393.3	4150.9	4412.3	4558.7	4427.8	4680.7	4624.1	4324.3	4223.7	4217.5	4393.3	4150.9	4412.3	4558.7	4427.8	4680.7	4624.1	4324.3	4223.7	4217.5	High	High	High	High
-4.62062e+18	FALSE	High	IsMasterProtein	TGGT1_286440-t26_1-p1	transcript=TGGT1_286440-t26_1 | gene=TGGT1_286440 | organism=Toxoplasma_gondii_GT1 | gene_product=Tudor domain-containing protein [Source:UniProtKB/TrEMBL;Acc:A0A125YY59] | transcript_product=malic enzyme | location=TGGT1_chrV:1681686-1685375(-) | protein_length=370 | sequence_SO=chromosome | SO=protein_coding_gene | is_pseudo=false	0	19.254	10	3	3	3	370	41.8	5.62	12.27	3	0.945	1.093	0.942	1.032	1.104	1.038	0.88	0.954	0.953	155.5	147	169.9	146.5	160.4	171.6	161.3	136.8	148.3	148.1	155.5	147	169.9	146.5	160.4	171.6	161.3	136.8	148.3	148.1	High	High	High	High
4.67386e+18	FALSE	High	IsMasterProtein	TGGT1_250710-t26_1-p1	transcript=TGGT1_250710-t26_1 | gene=TGGT1_250710 | organism=Toxoplasma_gondii_GT1 | gene_product=Microneme protein MIC10 [Source:UniProtKB/TrEMBL;Acc:A0A125YLT8] | transcript_product=microneme protein MIC10 | location=TGGT1_chrXII:5071359-5071955(+) | protein_length=198 | sequence_SO=chromosome | SO=protein_coding_gene | is_pseudo=false	0	268.2	60	25	215	25	198	23.1	5.87	932.21	25	0.945	1.008	1.028	1	1.01	1.025	0.8	0.961	0.971	67054.9	63387	67596.1	68949.2	67084.1	67758.2	68759.2	53643.9	64421.6	65089.7	67054.9	63387	67596.1	68949.2	67084.1	67758.2	68759.2	53643.9	64421.6	65089.7	High	High	High	High
8.71008e+18	FALSE	High	IsMasterProtein	TGGT1_247350-t26_1-p1	transcript=TGGT1_247350-t26_1 | gene=TGGT1_247350 | organism=Toxoplasma_gondii_GT1 | gene_product=Thioredoxin domain-containing protein [Source:UniProtKB/TrEMBL;Acc:A0A125YFL3] | transcript_product=thioredoxin domain-containing protein | location=TGGT1_chrXII:3207736-3209852(-) | protein_length=312 | sequence_SO=chromosome | SO=protein_coding_gene | is_pseudo=false	0	68.341	25	6	64	5	312	33.7	9.1	254.51	6	0.945	0.962	1.01	0.968	1.008	1.027	0.889	0.925	0.864	25369.5	23982.1	24394.4	25634.2	24565.3	25566.6	26059.7	22559.5	23457.1	21922.7	25369.5	23982.1	24394.4	25634.2	24565.3	25566.6	26059.7	22559.5	23457.1	21922.7	High	High	High	High
1.68203e+18	FALSE	High	IsMasterProtein	TGGT1_243430-t26_1-p1	transcript=TGGT1_243430-t26_1 | gene=TGGT1_243430 | organism=Toxoplasma_gondii_GT1 | gene_product=OTU domain-containing protein [Source:UniProtKB/TrEMBL;Acc:S7UED7] | transcript_product=OTU family cysteine protease | location=TGGT1_chrVI:2539114-2545055(-) | protein_length=1395 | sequence_SO=chromosome | SO=protein_coding_gene | is_pseudo=false	0	6.966	1	1	1	1	1395	147.2	8.16	3.38	1	0.945	1.141	1.089	1.159	1.059	0.964	1.108	1.012	0.962	73.3	69.3	83.7	79.8	85	77.7	70.7	81.3	74.2	70.5	73.3	69.3	83.7	79.8	85	77.7	70.7	81.3	74.2	70.5	High	High	High	High
3.69523e+18	FALSE	High	IsMasterProtein	TGGT1_247610-t26_1-p1	transcript=TGGT1_247610-t26_1 | gene=TGGT1_247610 | organism=Toxoplasma_gondii_GT1 | gene_product=U6 snRNA-associated Sm-like protein LSm5 [Source:UniProtKB/TrEMBL;Acc:A0A125YYF1] | transcript_product=putative small nuclear ribonucleoprotein E | location=TGGT1_chrXII:3376784-3377500(-) | protein_length=119 | sequence_SO=chromosome | SO=protein_coding_gene | is_pseudo=false	0	15.519	29	2	2	2	119	12.4	4.72	9.99	2	0.945	0.987	1.014	1.056	1.066	1.111	0.994	0.963	0.953	809.7	765.5	799.5	821.3	855	863.2	899.7	804.6	780	771.4	809.7	765.5	799.5	821.3	855	863.2	899.7	804.6	780	771.4	High	High	High	High
6.73255e+17	FALSE	High	IsMasterProtein	TGGT1_201250-t26_1-p1	transcript=TGGT1_201250-t26_1 | gene=TGGT1_201250 | organism=Toxoplasma_gondii_GT1 | gene_product=Putative histone lysine methyltransferase, SET [Source:UniProtKB/TrEMBL;Acc:S7UV73] | transcript_product=putative histone lysine methyltransferase, SET | location=TGGT1_chrVIIa:3839435-3846508(+) | protein_length=1635 | sequence_SO=chromosome | SO=protein_coding_gene | is_pseudo=false	0	8.259	2	4	6	3	1635	177.9	6.3	11.89	4	0.945	1.086	0.984	0.935	0.882	0.877	1.035	0.995	0.993	251	237.4	272.6	247	234.7	221.4	220.1	259.9	249.7	249.3	251	237.4	272.6	247	234.7	221.4	220.1	259.9	249.7	249.3	High	High	High	High
-7.07421e+18	FALSE	High	IsMasterProtein	TGGT1_223490-t26_1-p1	transcript=TGGT1_223490-t26_1 | gene=TGGT1_223490 | organism=Toxoplasma_gondii_GT1 | gene_product=hypothetical protein | transcript_product=hypothetical protein | location=TGGT1_chrX:3686851-3687786(+) | protein_length=311 | sequence_SO=chromosome | SO=protein_coding_gene | is_pseudo=false	0	29.527	24	6	8	6	311	34.6	9.76	26	6	0.946	0.982	0.992	1.025	1.01	1.035	0.944	0.985	0.895	949.6	898	932.8	941.9	973	959.5	982.9	896.7	935.5	850	949.6	898	932.8	941.9	973	959.5	982.9	896.7	935.5	850	High	High	High	High
6.24723e+18	FALSE	High	IsMasterProtein	TGGT1_208010-t26_1-p1	transcript=TGGT1_208010-t26_1 | gene=TGGT1_208010 | organism=Toxoplasma_gondii_GT1 | gene_product=hypothetical protein | transcript_product=hypothetical protein | location=TGGT1_chrIb:526454-530738(+) | protein_length=472 | sequence_SO=chromosome | SO=protein_coding_gene | is_pseudo=false	0	6.198	4	1	1	1	472	50.6	5.33	4.16	1	0.946	0.98	0.786	0.964	0.821	1.037	1.068	0.823	1.07	7.6	7.2	7.5	6	7.3	6.3	7.9	8.1	6.3	8.1	7.6	7.2	7.5	6	7.3	6.3	7.9	8.1	6.3	8.1	High	High	High	High
-8.03114e+18	FALSE	High	IsMasterProtein	TGGT1_201140-t26_1-p1	transcript=TGGT1_201140-t26_1 | gene=TGGT1_201140 | organism=Toxoplasma_gondii_GT1 | gene_product=hypothetical protein | transcript_product=hypothetical protein | location=TGGT1_chrVIIa:3909741-3917284(+) | protein_length=1051 | sequence_SO=chromosome | SO=protein_coding_gene | is_pseudo=false	0	40.644	9	10	14	10	1051	113.8	6.99	47.13	10	0.946	0.974	0.987	1.016	0.994	1.026	0.95	0.914	0.963	2416.3	2285.6	2353.6	2384.8	2453.8	2400.8	2479.5	2294.7	2209.2	2327.5	2416.3	2285.6	2353.6	2384.8	2453.8	2400.8	2479.5	2294.7	2209.2	2327.5	High	High	High	High
8.41052e+18	FALSE	High	IsMasterProtein	TGGT1_214950-t26_1-p1	transcript=TGGT1_214950-t26_1 | gene=TGGT1_214950 | organism=Toxoplasma_gondii_GT1 | gene_product=hypothetical protein | transcript_product=hypothetical protein | location=TGGT1_chrX:6501033-6502602(+) | protein_length=195 | sequence_SO=chromosome | SO=protein_coding_gene | is_pseudo=false	0	26.932	13	2	20	2	195	21.5	3.68	92.02	2	0.946	1.056	1.063	0.983	1.036	0.989	0.793	0.97	0.968	11191.1	10588.6	11817.6	11892.3	10995.9	11592.5	11065.6	8875	10855	10831.1	11191.1	10588.6	11817.6	11892.3	10995.9	11592.5	11065.6	8875	10855	10831.1	High	High	High	High
5.75767e+18	FALSE	High	IsMasterProtein	TGGT1_269970-t26_1-p1	transcript=TGGT1_269970-t26_1 | gene=TGGT1_269970 | organism=Toxoplasma_gondii_GT1 | gene_product=hypothetical protein | transcript_product=hypothetical protein | location=TGGT1_chrVIII:5489937-5490308(-) | protein_length=123 | sequence_SO=chromosome | SO=protein_coding_gene | is_pseudo=false	0	12.441	17	3	6	3	123	13.1	4.37	22.42	3	0.946	1.039	1.135	1.113	1.115	1.153	0.925	1.192	1.226	1377.4	1303.3	1430.8	1563.7	1533.6	1535.3	1588.3	1273.9	1642.2	1689.1	1377.4	1303.3	1430.8	1563.7	1533.6	1535.3	1588.3	1273.9	1642.2	1689.1	High	High	High	High
-8.09942e+18	FALSE	High	IsMasterProtein	TGGT1_244080-t26_1-p1	transcript=TGGT1_244080-t26_1 | gene=TGGT1_244080 | organism=Toxoplasma_gondii_GT1 | gene_product=hypothetical protein | transcript_product=hypothetical protein | location=TGGT1_chrVI:2922506-2924683(+) | protein_length=376 | sequence_SO=chromosome | SO=protein_coding_gene | is_pseudo=false	0	12.395	3	1	5	1	376	39.7	8.69	17.86	1	0.946	0.887	1.056	1.097	1.097	1.08	0.849	0.994	1.096	880.8	833.5	781.1	930	966.4	966.5	951.2	747.7	875.7	965.3	880.8	833.5	781.1	930	966.4	966.5	951.2	747.7	875.7	965.3	High	High	High	High
6.46219e+18	FALSE	High	IsMasterProtein	TGGT1_308020-t26_1-p1	transcript=TGGT1_308020-t26_1 | gene=TGGT1_308020 | organism=Toxoplasma_gondii_GT1 | gene_product=SAG-related sequence SRS57 [Source:UniProtKB/TrEMBL;Acc:A0A125YU72] | transcript_product=SAG-related sequence SRS57 | location=TGGT1_chrXII:456740-457897(-) | protein_length=385 | sequence_SO=chromosome | SO=protein_coding_gene | is_pseudo=false	0	207.296	62	16	148	16	385	41.7	7.14	656.84	16	0.947	0.995	1.045	1.003	1.044	1.058	0.973	0.972	0.945	36474.4	34523.8	36280.5	38099.9	36580.1	38070.5	38605.6	35501.6	35471.2	34456.6	36474.4	34523.8	36280.5	38099.9	36580.1	38070.5	38605.6	35501.6	35471.2	34456.6	High	High	High	High
7.36696e+18	FALSE	High	IsMasterProtein	TGGT1_246670-t26_1-p1	transcript=TGGT1_246670-t26_1 | gene=TGGT1_246670 | organism=Toxoplasma_gondii_GT1 | gene_product=hypothetical protein | transcript_product=hypothetical protein | location=TGGT1_chrXII:2851344-2853405(+) | protein_length=358 | sequence_SO=chromosome | SO=protein_coding_gene | is_pseudo=false	0	14.231	4	1	2	1	358	37.3	5.34	9.11	1	0.947	1.044	0.91	1.028	0.964	1.054	0.998	0.873	1.019	68.1	64.5	71.1	62	70	65.7	71.8	68	59.5	69.4	68.1	64.5	71.1	62	70	65.7	71.8	68	59.5	69.4	High	High	High	High
8.82274e+18	FALSE	High	IsMasterProtein	TGGT1_228300-t26_1-p1	transcript=TGGT1_228300-t26_1 | gene=TGGT1_228300 | organism=Toxoplasma_gondii_GT1 | gene_product=NFACT-R_1 domain-containing protein [Source:UniProtKB/TrEMBL;Acc:S7WDD0] | transcript_product=CCDC25 protein | location=TGGT1_chrX:340069-344804(-) | protein_length=222 | sequence_SO=chromosome | SO=protein_coding_gene | is_pseudo=false	0	14.511	15	3	4	3	222	26.3	6.2	14.6	3	0.947	1.019	1.007	0.982	1.044	1.007	0.976	0.948	0.933	1725.2	1634	1758.8	1737.7	1694.8	1801.5	1736.6	1683	1635.9	1610.1	1725.2	1634	1758.8	1737.7	1694.8	1801.5	1736.6	1683	1635.9	1610.1	High	High	High	High
3.52478e+17	FALSE	High	IsMasterProtein	TGGT1_268760-t26_1-p1	transcript=TGGT1_268760-t26_1 | gene=TGGT1_268760 | organism=Toxoplasma_gondii_GT1 | gene_product=hypothetical protein | transcript_product=hypothetical protein | location=TGGT1_chrVIII:6327416-6328769(-) | protein_length=292 | sequence_SO=chromosome | SO=protein_coding_gene | is_pseudo=false	0	96.287	45	13	62	13	292	32	7.33	261.42	13	0.947	1.028	1.036	1.004	1.019	1.031	0.933	0.997	0.883	14801.9	14022.4	15213.8	15333.5	14864.2	15081.3	15267.4	13816.6	14755.3	13069.3	14801.9	14022.4	15213.8	15333.5	14864.2	15081.3	15267.4	13816.6	14755.3	13069.3	High	High	High	High
-4.34842e+18	FALSE	High	IsMasterProtein	TGGT1_264430-t26_1-p1	transcript=TGGT1_264430-t26_1 | gene=TGGT1_264430 | organism=Toxoplasma_gondii_GT1 | gene_product=hypothetical protein | transcript_product=hypothetical protein | location=TGGT1_chrIX:2067836-2071288(+) | protein_length=1151 | sequence_SO=chromosome | SO=protein_coding_gene | is_pseudo=false	0	33.595	7	6	11	6	1151	118.5	8.1	36.33	6	0.947	1.02	1.034	1.023	1.011	1.058	0.949	1.01	1.03	4044	3831.5	4125.2	4182.5	4138.7	4088.1	4276.8	3839.2	4082.5	4166	4044	3831.5	4125.2	4182.5	4138.7	4088.1	4276.8	3839.2	4082.5	4166	High	High	High	High
5.77618e+18	FALSE	High	IsMasterProtein	TGGT1_306640-t26_1-p1	transcript=TGGT1_306640-t26_1 | gene=TGGT1_306640 | organism=Toxoplasma_gondii_GT1 | gene_product=t-SNARE coiled-coil homology domain-containing protein [Source:UniProtKB/TrEMBL;Acc:S7UID7] | transcript_product=hypothetical protein | location=TGGT1_chrIX:6015453-6017604(-) | protein_length=376 | sequence_SO=chromosome | SO=protein_coding_gene | is_pseudo=false	0	17.962	11	3	4	3	376	41.1	5.82	14.01	3	0.947	0.96	1.014	0.988	1.009	1.007	0.921	0.934	0.938	946.4	896.7	908.9	960	935.2	955	953.1	871.3	884.3	888	946.4	896.7	908.9	960	935.2	955	953.1	871.3	884.3	888	High	High	High	High
2.29865e+18	FALSE	High	IsMasterProtein	TGGT1_293690-t26_1-p1	transcript=TGGT1_293690-t26_1 | gene=TGGT1_293690 | organism=Toxoplasma_gondii_GT1 | gene_product=Profilin [Source:UniProtKB/TrEMBL;Acc:S7UIQ6] | transcript_product=profilin PRF | location=TGGT1_chrIa:496750-498091(-) | protein_length=165 | sequence_SO=chromosome | SO=protein_coding_gene | is_pseudo=false	0	160.985	66	11	99	11	165	17.7	4.58	465.85	11	0.948	1.079	1.076	1.025	1.065	1.072	1.011	1.021	1.007	36893	34960	39817.9	39698.7	37820.1	39274.4	39534.8	37297.3	37662.3	37141.7	36893	34960	39817.9	39698.7	37820.1	39274.4	39534.8	37297.3	37662.3	37141.7	High	High	High	High
7.21298e+18	FALSE	High	IsMasterProtein	TGGT1_249370-t26_1-p1	transcript=TGGT1_249370-t26_1 | gene=TGGT1_249370 | organism=Toxoplasma_gondii_GT1 | gene_product=SUI1 domain-containing protein [Source:UniProtKB/TrEMBL;Acc:S7V0U2] | transcript_product=putative translation initiation factor SUI1 | location=TGGT1_chrXII:4430669-4432717(-) | protein_length=325 | sequence_SO=chromosome | SO=protein_coding_gene | is_pseudo=false	0	22.092	6	3	20	1	325	36.5	9.85	82.24	3	0.948	1.069	1.103	1.097	1.152	1.163	1.185	1.083	1.199	2251.6	2133.7	2406.2	2484.3	2469.5	2593	2618.7	2667.4	2438.1	2699.8	2251.6	2133.7	2406.2	2484.3	2469.5	2593	2618.7	2667.4	2438.1	2699.8	High	High	High	High
6.58536e+18	FALSE	High	IsMasterProtein	TGGT1_209420-t26_1-p1	transcript=TGGT1_209420-t26_1 | gene=TGGT1_209420 | organism=Toxoplasma_gondii_GT1 | gene_product=hypothetical protein | transcript_product=hypothetical protein | location=TGGT1_chrIb:1224171-1225667(-) | protein_length=250 | sequence_SO=chromosome | SO=protein_coding_gene | is_pseudo=false	0	82.607	60	14	32	14	250	26.8	5.72	122.21	14	0.948	1.014	1.017	0.975	0.995	1.019	0.882	0.951	0.951	15325.7	14524.4	15541.8	15593.4	14940.7	15254.4	15610.1	13521.2	14582.1	14580	15325.7	14524.4	15541.8	15593.4	14940.7	15254.4	15610.1	13521.2	14582.1	14580	High	High	High	High
8.71025e+18	FALSE	High	IsMasterProtein	TGGT1_290300-t26_1-p1	transcript=TGGT1_290300-t26_1 | gene=TGGT1_290300 | organism=Toxoplasma_gondii_GT1 | gene_product=hypothetical protein | transcript_product=hypothetical protein | location=TGGT1_chrIX:3500533-3501630(+) | protein_length=365 | sequence_SO=chromosome | SO=protein_coding_gene | is_pseudo=false	0	58.179	25	7	18	7	365	38.2	5.85	76.62	7	0.948	0.996	1.059	1.05	1.063	1.069	1.012	1.027	1.041	5841.7	5537.5	5819.7	6184.7	6135.4	6207.6	6243.6	5909.5	5999.7	6083.4	5841.7	5537.5	5819.7	6184.7	6135.4	6207.6	6243.6	5909.5	5999.7	6083.4	High	High	High	High
-7.02011e+18	FALSE	High	IsMasterProtein	TGGT1_266930-t26_1-p1	transcript=TGGT1_266930-t26_1 | gene=TGGT1_266930 | organism=Toxoplasma_gondii_GT1 | gene_product=General transcription factor IIH polypeptide 3 GTF2H3 [Source:UniProtKB/TrEMBL;Acc:S7UG72] | transcript_product=general transcription factor IIH polypeptide 3 GTF2H3 | location=TGGT1_chrIX:727026-731937(+) | protein_length=549 | sequence_SO=chromosome | SO=protein_coding_gene | is_pseudo=false	0.001	4.298	3	1	1	1	549	57.3	8.12	3.25	1	0.948	1.012	1.006	1.052	0.937	1.055	1.041	0.914	0.918	122.5	116.1	124	123.3	128.8	114.8	129.2	127.5	112	112.5	122.5	116.1	124	123.3	128.8	114.8	129.2	127.5	112	112.5	High	High	High	High
-3.1073e+17	FALSE	High	IsMasterProtein	TGGT1_280800-t26_1-p1	transcript=TGGT1_280800-t26_1 | gene=TGGT1_280800 | organism=Toxoplasma_gondii_GT1 | gene_product=SWI2/SNF2 SRCAP/Ino80 [Source:UniProtKB/TrEMBL;Acc:S7W9I8] | transcript_product=SWI2/SNF2 SRCAP/Ino80 | location=TGGT1_chrVIIa:44179-60341(-) | protein_length=2894 | sequence_SO=chromosome | SO=protein_coding_gene | is_pseudo=false	0	7.54	0	1	2	1	2894	316.8	5.2	6.82	1	0.948	0.763	0.882	0.854	1.005	0.911	0.927	0.832	1.004	49.7	47.1	37.9	43.8	42.5	50	45.3	46.1	41.4	49.9	49.7	47.1	37.9	43.8	42.5	50	45.3	46.1	41.4	49.9	High	High	High	High
-4.365e+18	FALSE	High	IsMasterProtein	TGGT1_290710-t26_1-p1	transcript=TGGT1_290710-t26_1 | gene=TGGT1_290710 | organism=Toxoplasma_gondii_GT1 | gene_product=hypothetical protein | transcript_product=hypothetical protein | location=TGGT1_chrIX:3661898-3664530(-) | protein_length=236 | sequence_SO=chromosome | SO=protein_coding_gene | is_pseudo=false	0	22.318	22	5	10	5	236	26.8	10.76	34.66	5	0.948	0.862	0.968	0.988	0.979	0.99	0.574	0.937	1.123	7227.2	6852.8	6227.1	6998.3	7137.7	7076.3	7153.7	4149	6768.7	8113.5	7227.2	6852.8	6227.1	6998.3	7137.7	7076.3	7153.7	4149	6768.7	8113.5	High	High	High	High
8.8784e+18	FALSE	High	IsMasterProtein	TGGT1_311750-t26_1-p1	transcript=TGGT1_311750-t26_1 | gene=TGGT1_311750 | organism=Toxoplasma_gondii_GT1 | gene_product=Mago-bind domain-containing protein [Source:UniProtKB/TrEMBL;Acc:A0A125YLG3] | transcript_product=mago binding protein | location=TGGT1_chrXI:2211180-2214199(+) | protein_length=250 | sequence_SO=chromosome | SO=protein_coding_gene | is_pseudo=false	0	26.754	27	7	18	7	250	28.1	9.55	59.01	7	0.948	1.008	1.012	1.016	1.035	1.04	0.966	0.968	1.006	5705	5409.5	5748.9	5771.6	5794.9	5902.1	5930.6	5511.7	5521.2	5737.3	5705	5409.5	5748.9	5771.6	5794.9	5902.1	5930.6	5511.7	5521.2	5737.3	High	High	High	High
-5.83182e+18	FALSE	High	IsMasterProtein	TGGT1_309010-t26_1-p1	transcript=TGGT1_309010-t26_1 | gene=TGGT1_309010 | organism=Toxoplasma_gondii_GT1 | gene_product=EFP domain-containing protein [Source:UniProtKB/TrEMBL;Acc:S7UT07] | transcript_product=putative elongation factor P | location=TGGT1_chrXI:397290-400221(-) | protein_length=242 | sequence_SO=chromosome | SO=protein_coding_gene | is_pseudo=false	0	8.902	9	2	2	2	242	26	9.07	8.05	2	0.949	1.014	1.022	1.029	1.057	1.134	1.083	1.058	1.045	1061.5	1006.8	1076.5	1085.3	1091.8	1122.2	1203.9	1149.1	1122.8	1109.4	1061.5	1006.8	1076.5	1085.3	1091.8	1122.2	1203.9	1149.1	1122.8	1109.4	High	High	High	High
5.14141e+18	FALSE	Medium	IsMasterProtein	TGGT1_203480-t26_1-p1	transcript=TGGT1_203480-t26_1 | gene=TGGT1_203480 | organism=Toxoplasma_gondii_GT1 | gene_product=hypothetical protein | transcript_product=hypothetical protein | location=TGGT1_chrVIIa:2381334-2390648(-) | protein_length=1403 | sequence_SO=chromosome | SO=protein_coding_gene | is_pseudo=false	0.015	1.837	1	1	1	1	1403	145.7	7.02	3.05	1	0.949	0.895	0.912	0.989	1.006	0.953	0.979	0.997	0.872	104.7	99.3	93.7	95.4	103.5	105.3	99.8	102.4	104.4	91.3	104.7	99.3	93.7	95.4	103.5	105.3	99.8	102.4	104.4	91.3	High	High	High	High
-1.12747e+18	FALSE	High	IsMasterProtein	TGGT1_316340-t26_1-p1	transcript=TGGT1_316340-t26_1 | gene=TGGT1_316340 | organism=Toxoplasma_gondii_GT1 | gene_product=hypothetical protein | transcript_product=hypothetical protein | location=TGGT1_chrXI:5191484-5192942(+) | protein_length=243 | sequence_SO=chromosome | SO=protein_coding_gene | is_pseudo=false	0	23.635	16	4	9	4	243	26.8	4.92	31.45	4	0.949	1.039	1.124	1.191	1.047	1.132	0.91	1.002	1.188	2788.8	2646	2898.8	3134.6	3320.1	2921.2	3156.7	2537.5	2794	3314.2	2788.8	2646	2898.8	3134.6	3320.1	2921.2	3156.7	2537.5	2794	3314.2	High	High	High	High
6.60518e+18	FALSE	High	IsMasterProtein	TGGT1_208990-t26_1-p1	transcript=TGGT1_208990-t26_1 | gene=TGGT1_208990 | organism=Toxoplasma_gondii_GT1 | gene_product=G-patch_2 domain-containing protein [Source:UniProtKB/TrEMBL;Acc:S7UIL4] | transcript_product=hypothetical protein | location=TGGT1_chrIb:952817-954097(+) | protein_length=426 | sequence_SO=chromosome | SO=protein_coding_gene | is_pseudo=false	0	26.117	15	3	3	3	426	45.9	5.85	17.06	3	0.949	0.956	0.903	0.962	0.969	1.035	0.98	0.98	0.972	297	281.8	284	268.2	285.8	287.8	307.4	291.2	291	288.6	297	281.8	284	268.2	285.8	287.8	307.4	291.2	291	288.6	High	High	High	High
2.15233e+18	FALSE	High	IsMasterProtein	TGGT1_295340-t26_1-p1	transcript=TGGT1_295340-t26_1 | gene=TGGT1_295340 | organism=Toxoplasma_gondii_GT1 | gene_product=UV excision repair protein RAD23 [Source:UniProtKB/TrEMBL;Acc:A0A125YYY8] | transcript_product=UV excision repair protein Rad23 protein | location=TGGT1_chrIa:1797323-1802019(+) | protein_length=380 | sequence_SO=chromosome | SO=protein_coding_gene | is_pseudo=false	0	114.419	50	15	41	15	380	39.7	4.53	182.64	15	0.949	1	1.007	0.985	0.991	1.008	0.87	0.931	0.915	11184.5	10612.2	11187.4	11261.2	11016.3	11086.2	11271.6	9731	10408.1	10233.2	11184.5	10612.2	11187.4	11261.2	11016.3	11086.2	11271.6	9731	10408.1	10233.2	High	High	High	High
-3.15262e+18	FALSE	High	IsMasterProtein	TGGT1_248830-t26_1-p1	transcript=TGGT1_248830-t26_1 | gene=TGGT1_248830 | organism=Toxoplasma_gondii_GT1 | gene_product=Phosphoinositide phospholipase C [Source:UniProtKB/TrEMBL;Acc:S7V0V3] | transcript_product=phosphoinositide phospholipase PIPLC | location=TGGT1_chrXII:4131545-4144034(-) | protein_length=1097 | sequence_SO=chromosome | SO=protein_coding_gene | is_pseudo=false	0	15.147	3	2	2	2	1097	121.9	7.69	9.76	2	0.949	0.887	1.037	1.245	0.929	1.044	1.231	0.91	1.037	88.2	83.7	78.3	91.5	109.9	82	92.1	108.6	80.3	91.5	88.2	83.7	78.3	91.5	109.9	82	92.1	108.6	80.3	91.5	High	High	High	High
2.06172e+17	FALSE	High	IsMasterProtein	TGGT1_276110-t26_1-p1	transcript=TGGT1_276110-t26_1 | gene=TGGT1_276110 | organism=Toxoplasma_gondii_GT1 | gene_product=Cytochrome b5 heme-binding domain-containing protein [Source:UniProtKB/TrEMBL;Acc:A0A125YGL6] | transcript_product=cytochrome b5 family heme/steroid binding domain-containing protein | location=TGGT1_chrIII:129843-131513(+) | protein_length=143 | sequence_SO=chromosome | SO=protein_coding_gene | is_p…	0	25.391	41	4	8	4	143	15.2	6.67	32.83	4	0.949	0.992	0.991	0.932	0.975	0.976	0.857	0.927	0.95	4529.6	4299.3	4492.9	4486.8	4221.5	4417.1	4420.8	3882.6	4200.5	4302.6	4529.6	4299.3	4492.9	4486.8	4221.5	4417.1	4420.8	3882.6	4200.5	4302.6	High	High	High	High
2.48485e+18	FALSE	High	IsMasterProtein	TGGT1_221200B-t26_1-p1	transcript=TGGT1_221200B-t26_1 | gene=TGGT1_221200B | organism=Toxoplasma_gondii_GT1 | gene_product=CW-type Zinc Finger protein [Source:UniProtKB/TrEMBL;Acc:S7W0D8] | transcript_product=CW-type Zinc Finger protein | location=TGGT1_chrII:103063-106965(-) | protein_length=1300 | sequence_SO=chromosome | SO=protein_coding_gene | is_pseudo=false	0	23.411	12	5	7	4	1300	136.6	5.2	27.76	5	0.949	1.001	1.023	1.026	1.085	1.032	1.033	0.983	0.881	632.8	600.7	633.6	647.2	649.2	686.5	652.8	653.7	621.9	557.7	632.8	600.7	633.6	647.2	649.2	686.5	652.8	653.7	621.9	557.7	High	High	High	High
-2.49897e+18	FALSE	High	IsMasterProtein	TGGT1_297140-t26_1-p1	transcript=TGGT1_297140-t26_1 | gene=TGGT1_297140 | organism=Toxoplasma_gondii_GT1 | gene_product=U6 snRNA-associated Sm-like protein LSm2 [Source:UniProtKB/TrEMBL;Acc:S7UK25] | transcript_product=putative U6 snRNA-associated sm family protein Lsm2 | location=TGGT1_chrII:1541219-1542559(+) | protein_length=101 | sequence_SO=chromosome | SO=protein_coding_gene | is_pseudo=false	0	6.73	19	2	4	2	101	11.6	7.91	11.13	2	0.949	0.979	1.015	0.991	1.035	1.042	0.939	0.916	0.935	1276.6	1212	1249.1	1296.2	1264.6	1321	1329.7	1198.2	1168.7	1193.8	1276.6	1212	1249.1	1296.2	1264.6	1321	1329.7	1198.2	1168.7	1193.8	High	High	High	High
6.3251e+18	FALSE	High	IsMasterProtein	TGGT1_207830-t26_1-p1	transcript=TGGT1_207830-t26_1 | gene=TGGT1_207830 | organism=Toxoplasma_gondii_GT1 | gene_product=MORN repeat-containing protein [Source:UniProtKB/TrEMBL;Acc:A0A125YQH1] | transcript_product=MORN repeat-containing protein | location=TGGT1_chrIb:337658-340812(+) | protein_length=366 | sequence_SO=chromosome | SO=protein_coding_gene | is_pseudo=false	0	40.931	16	5	8	5	366	39.8	5.85	29.96	5	0.949	0.927	0.978	0.998	0.992	0.965	0.975	0.92	0.914	2363.4	2244.1	2191.7	2312.4	2358.4	2344.1	2280.5	2305	2173.3	2160.9	2363.4	2244.1	2191.7	2312.4	2358.4	2344.1	2280.5	2305	2173.3	2160.9	High	High	High	High
-4.8574e+18	FALSE	High	IsMasterProtein	TGGT1_316330-t26_1-p1	transcript=TGGT1_316330-t26_1 | gene=TGGT1_316330 | organism=Toxoplasma_gondii_GT1 | gene_product=Superoxide dismutase SOD2 [Source:UniProtKB/TrEMBL;Acc:S7UM71] | transcript_product=superoxide dismutase SOD2 | location=TGGT1_chrXI:5187948-5189870(-) | protein_length=287 | sequence_SO=chromosome | SO=protein_coding_gene | is_pseudo=false	0	99.186	41	10	30	10	287	31.4	7.58	140.52	10	0.95	1.04	1.012	0.982	1.025	1.032	0.893	0.958	0.99	12342	11719.4	12831.9	12488.4	12114.8	12652	12743.1	11024.4	11825.4	12223.5	12342	11719.4	12831.9	12488.4	12114.8	12652	12743.1	11024.4	11825.4	12223.5	High	High	High	High
-4.06332e+17	FALSE	High	IsMasterProtein	TGGT1_270230-t26_1-p1	transcript=TGGT1_270230-t26_1 | gene=TGGT1_270230 | organism=Toxoplasma_gondii_GT1 | gene_product=hypothetical protein | transcript_product=hypothetical protein | location=TGGT1_chrVIII:5313538-5322232(-) | protein_length=1811 | sequence_SO=chromosome | SO=protein_coding_gene | is_pseudo=false	0.004	2.587	1	2	2	2	1811	192.7	5.33	4.38	2	0.95	1.109	1.043	1.126	1.01	1.169	1.512	1.042	1.156	198.6	188.6	220.3	207.2	223.6	200.6	232.2	300.2	207	229.5	198.6	188.6	220.3	207.2	223.6	200.6	232.2	300.2	207	229.5	High	High	High	High
-7.65754e+18	FALSE	High	IsMasterProtein	TGGT1_211850-t26_1-p1	transcript=TGGT1_211850-t26_1 | gene=TGGT1_211850 | organism=Toxoplasma_gondii_GT1 | gene_product=hypothetical protein | transcript_product=hypothetical protein | location=TGGT1_chrX:4062162-4062901(-) | protein_length=173 | sequence_SO=chromosome | SO=protein_coding_gene | is_pseudo=false	0	9.962	12	2	2	2	173	18.4	7.64	6.84	2	0.95	1.206	1.147	1.102	1.215	1.202	1.054	1.108	1.205	562.4	534.1	678.3	644.9	619.6	683.2	675.8	592.7	623	677.8	562.4	534.1	678.3	644.9	619.6	683.2	675.8	592.7	623	677.8	High	High	High	High
7.61954e+17	FALSE	High	IsMasterProtein	TGGT1_202750-t26_1-p1	transcript=TGGT1_202750-t26_1 | gene=TGGT1_202750 | organism=Toxoplasma_gondii_GT1 | gene_product=3' exoribonuclease family, domain 1 domain-containing protein [Source:UniProtKB/TrEMBL;Acc:S7WAK7] | transcript_product=3' exoribonuclease family, domain 1 domain-containing protein | location=TGGT1_chrVIIa:2955721-2960686(+) | protein_length=344 | sequence_SO=chromosome | SO=protein_coding_gene | is…	0	24.347	18	3	4	3	344	35.8	4.93	18.85	3	0.95	0.943	0.944	1.052	1.125	0.955	0.979	1	1.03	149.7	142.2	141.1	141.4	157.5	168.5	143	146.6	149.8	154.2	149.7	142.2	141.1	141.4	157.5	168.5	143	146.6	149.8	154.2	High	High	High	High
-7.80362e+18	FALSE	High	IsMasterProtein	TGGT1_285268-t26_1-p1	transcript=TGGT1_285268-t26_1 | gene=TGGT1_285268 | organism=Toxoplasma_gondii_GT1 | gene_product=J domain-containing protein [Source:UniProtKB/TrEMBL;Acc:S7W2Z3] | transcript_product=DnaJ domain-containing protein | location=TGGT1_chrV:2325671-2330428(+) | protein_length=432 | sequence_SO=chromosome | SO=protein_coding_gene | is_pseudo=false	0	39.679	20	9	16	9	432	49.3	5.16	52.57	9	0.95	1.014	1.024	1.025	1.037	1.026	0.981	1.006	1.004	5348.5	5079.5	5422.6	5476.5	5481.6	5544.9	5485.5	5247	5380	5369.3	5348.5	5079.5	5422.6	5476.5	5481.6	5544.9	5485.5	5247	5380	5369.3	High	High	High	High
-8.85285e+18	FALSE	High	IsMasterProtein	TGGT1_208030-t26_1-p1	transcript=TGGT1_208030-t26_1 | gene=TGGT1_208030 | organism=Toxoplasma_gondii_GT1 | gene_product=Microneme protein MIC4 [Source:UniProtKB/TrEMBL;Acc:A0A125YP10] | transcript_product=microneme protein MIC4 | location=TGGT1_chrIb:547335-549077(+) | protein_length=580 | sequence_SO=chromosome | SO=protein_coding_gene | is_pseudo=false	0	266.155	49	24	198	24	580	63	5.22	758.76	24	0.95	0.978	1.019	0.982	1.007	1.018	0.906	0.939	0.953	76444.4	72600.3	74783.9	77905.7	75093.6	76943.7	77843.7	69286.7	71794	72839.6	76444.4	72600.3	74783.9	77905.7	75093.6	76943.7	77843.7	69286.7	71794	72839.6	High	High	High	High
8.43045e+18	FALSE	High	IsMasterProtein	TGGT1_224540-t26_1-p1	transcript=TGGT1_224540-t26_1 | gene=TGGT1_224540 | organism=Toxoplasma_gondii_GT1 | gene_product=hypothetical protein | transcript_product=hypothetical protein | location=TGGT1_chrX:2899044-2902293(-) | protein_length=969 | sequence_SO=chromosome | SO=protein_coding_gene | is_pseudo=false	0	6.515	3	2	2	2	969	99.4	4.96	5.42	2	0.95	0.959	0.932	0.926	0.953	0.958	0.832	0.84	0.829	1931.7	1834.6	1852.3	1800.4	1788.1	1841.1	1850.2	1606.3	1623.1	1602.2	1931.7	1834.6	1852.3	1800.4	1788.1	1841.1	1850.2	1606.3	1623.1	1602.2	High	High	High	High
-2.42684e+18	FALSE	High	IsMasterProtein	TGGT1_247230-t26_1-p1	transcript=TGGT1_247230-t26_1 | gene=TGGT1_247230 | organism=Toxoplasma_gondii_GT1 | gene_product=Centrin [Source:UniProtKB/TrEMBL;Acc:A0A125YHX6] | transcript_product=centrin | location=TGGT1_chrXII:3112753-3115530(+) | protein_length=169 | sequence_SO=chromosome | SO=protein_coding_gene | is_pseudo=false	0	15.526	15	4	8	4	169	19.3	4.89	23.96	4	0.95	0.978	0.933	0.922	0.908	0.897	0.777	0.852	0.804	4421.6	4201	4323.5	4127.3	4077.5	4013.3	3965.3	3433.8	3766.1	3556	4421.6	4201	4323.5	4127.3	4077.5	4013.3	3965.3	3433.8	3766.1	3556	High	High	High	High
3.72087e+17	FALSE	High	IsMasterProtein	TGGT1_246560-t26_1-p1	transcript=TGGT1_246560-t26_1 | gene=TGGT1_246560 | organism=Toxoplasma_gondii_GT1 | gene_product=V-type proton ATPase subunit G [Source:UniProtKB/TrEMBL;Acc:A0A125YRR8] | transcript_product=putative vacuolar ATP synthase subunit g | location=TGGT1_chrXII:2787836-2789911(+) | protein_length=131 | sequence_SO=chromosome | SO=protein_coding_gene | is_pseudo=false	0	83.541	54	10	37	10	131	14.8	5.08	157.37	10	0.95	1.038	1.022	1.018	1.028	1.032	0.85	0.991	1.011	10628.7	10099.1	11034.9	10860	10818	10924.2	10966.1	9033.5	10536.4	10742.7	10628.7	10099.1	11034.9	10860	10818	10924.2	10966.1	9033.5	10536.4	10742.7	High	High	High	High
6.20075e+18	FALSE	Medium	IsMasterProtein	TGGT1_224240-t26_1-p1	transcript=TGGT1_224240-t26_1 | gene=TGGT1_224240 | organism=Toxoplasma_gondii_GT1 | gene_product=PPM-type phosphatase domain-containing protein [Source:UniProtKB/TrEMBL;Acc:S7W4N8] | transcript_product=protein phosphatase 2C domain-containing protein | location=TGGT1_chrX:3090391-3097123(+) | protein_length=1147 | sequence_SO=chromosome | SO=protein_coding_gene | is_pseudo=false	0.011	2.12	1	1	1	1	1147	122.6	7.21	2.57	1	0.95	1.009	0.951	0.99	0.891	0.904	1.003	1.021	0.929	425.2	404	429	404.4	420.8	378.9	384.5	426.5	434.2	395.1	425.2	404	429	404.4	420.8	378.9	384.5	426.5	434.2	395.1	High	High	High	High
-7.02302e+18	FALSE	High	IsMasterProtein	TGGT1_289620-t26_1-p1	transcript=TGGT1_289620-t26_1 | gene=TGGT1_289620 | organism=Toxoplasma_gondii_GT1 | gene_product=Pept_C1 domain-containing protein [Source:UniProtKB/TrEMBL;Acc:S7UPV8] | transcript_product=cathepsin CPC1 | location=TGGT1_chrIX:3159262-3164695(-) | protein_length=733 | sequence_SO=chromosome | SO=protein_coding_gene | is_pseudo=false	0.001	5.662	2	1	2	1	733	79.2	5.85	7.1	1	0.95	1.015	1.003	0.925	1.008	0.992	0.845	0.923	0.933	891.6	847.2	905.2	894.1	825	898.9	884.7	753.7	823.1	832.1	891.6	847.2	905.2	894.1	825	898.9	884.7	753.7	823.1	832.1	High	High	High	High
-1.18411e+17	FALSE	High	IsMasterProtein	TGGT1_219690-t26_1-p1	transcript=TGGT1_219690-t26_1 | gene=TGGT1_219690 | organism=Toxoplasma_gondii_GT1 | gene_product=hypothetical protein | transcript_product=hypothetical protein | location=TGGT1_chrXII:662698-665306(-) | protein_length=208 | sequence_SO=chromosome | SO=protein_coding_gene | is_pseudo=false	0	46.725	25	7	50	7	208	23.3	8.95	148.76	7	0.95	0.91	1.01	0.966	0.972	0.994	0.619	0.948	1.009	19067.3	18117.7	17357.7	19256.6	18419.3	18530.3	18958.6	11803.2	18082.8	19247	19067.3	18117.7	17357.7	19256.6	18419.3	18530.3	18958.6	11803.2	18082.8	19247	High	High	High	High
5.2775e+16	FALSE	High	IsMasterProtein	TGGT1_285700-t26_1-p1	transcript=TGGT1_285700-t26_1 | gene=TGGT1_285700 | organism=Toxoplasma_gondii_GT1 | gene_product=Ubiquitin fusion degradation protein UFD1AP [Source:UniProtKB/TrEMBL;Acc:S7W333] | transcript_product=ubiquitin fusion degradation protein UFD1AP | location=TGGT1_chrV:2132793-2138253(-) | protein_length=732 | sequence_SO=chromosome | SO=protein_coding_gene | is_pseudo=false	0.001	4.726	1	1	1	1	732	80.5	8.57	3.08	1	0.951	1.051	1.069	0.983	1.107	1.055	1.138	0.945	1.002	48.7	46.3	51.2	52.1	47.9	54	51.4	55.4	46	48.8	48.7	46.3	51.2	52.1	47.9	54	51.4	55.4	46	48.8	High	High	High	High
5.38646e+18	FALSE	High	IsMasterProtein	TGGT1_295450-t26_1-p1	transcript=TGGT1_295450-t26_1 | gene=TGGT1_295450 | organism=Toxoplasma_gondii_GT1 | gene_product=Sjoegren syndrome nuclear autoantigen 1 family protein [Source:UniProtKB/TrEMBL;Acc:A0A125YRV2] | transcript_product=sjoegren syndrome nuclear autoantigen 1 family protein | location=TGGT1_chrIa:1731693-1733202(+) | protein_length=150 | sequence_SO=chromosome | SO=protein_coding_gene | is_pseudo=false	0	5.975	7	1	1	1	150	16.9	8.63	4.93	1	0.951	1.105	1.136	1.065	1.098	1.176	1.009	1.071	1.071	231.6	220.1	255.9	263.1	246.6	254.3	272.2	233.6	248	248.1	231.6	220.1	255.9	263.1	246.6	254.3	272.2	233.6	248	248.1	High	High	High	High
6.90694e+18	FALSE	High	IsMasterProtein	TGGT1_233340-t26_1-p1	transcript=TGGT1_233340-t26_1 | gene=TGGT1_233340 | organism=Toxoplasma_gondii_GT1 | gene_product=hypothetical protein | transcript_product=hypothetical protein | location=TGGT1_chrVIII:2595706-2600761(-) | protein_length=877 | sequence_SO=chromosome | SO=protein_coding_gene | is_pseudo=false	0.001	4.422	1	1	1	1	877	95.9	5.53	3.42	1	0.951	1.027	1.014	1.008	1.039	1.132	1.138	1.043	1.139	187.9	178.6	193	190.6	189.5	195.2	212.8	213.9	196	214.1	187.9	178.6	193	190.6	189.5	195.2	212.8	213.9	196	214.1	High	High	High	High
-7.65234e+18	FALSE	High	IsMasterProtein	TGGT1_289690-t26_1-p1	transcript=TGGT1_289690-t26_1 | gene=TGGT1_289690 | organism=Toxoplasma_gondii_GT1 | gene_product=Glyceraldehyde-3-phosphate dehydrogenase [Source:UniProtKB/TrEMBL;Acc:S7UQ54] | transcript_product=glyceraldehyde-3-phosphate dehydrogenase GAPDH1 | location=TGGT1_chrIX:3189155-3191218(-) | protein_length=489 | sequence_SO=chromosome | SO=protein_coding_gene | is_pseudo=false	0	234.072	54	21	345	21	489	53.3	8.31	1315.44	21	0.951	0.94	0.982	0.941	1.003	1.002	0.916	0.973	0.941	87710.5	83372.3	82491.3	86094	82538.6	87935.1	87889.9	80328.8	85307.9	82558.1	87710.5	83372.3	82491.3	86094	82538.6	87935.1	87889.9	80328.8	85307.9	82558.1	High	High	High	High
-4.556e+16	FALSE	High	IsMasterProtein	TGGT1_273320-t26_1-p1	transcript=TGGT1_273320-t26_1 | gene=TGGT1_273320 | organism=Toxoplasma_gondii_GT1 | gene_product=hypothetical protein | transcript_product=hypothetical protein | location=TGGT1_chrVIII:3591254-3594418(-) | protein_length=238 | sequence_SO=chromosome | SO=protein_coding_gene | is_pseudo=false	0	10.852	10	2	4	2	238	25.5	4.6	15.2	2	0.951	1.033	1.14	1.178	1.179	1.146	1.09	1.013	1.205	1141.8	1085.5	1179.7	1302.2	1344.8	1346	1308.4	1244.2	1157.2	1375.7	1141.8	1085.5	1179.7	1302.2	1344.8	1346	1308.4	1244.2	1157.2	1375.7	High	High	High	High
-4.52446e+18	FALSE	High	IsMasterProtein	TGGT1_248250-t26_1-p1	transcript=TGGT1_248250-t26_1 | gene=TGGT1_248250 | organism=Toxoplasma_gondii_GT1 | gene_product=Putative translation initiation factor IF-2 [Source:UniProtKB/TrEMBL;Acc:A0A125YKX3] | transcript_product=putative translation initiation factor IF-2 | location=TGGT1_chrXII:3694858-3697062(-) | protein_length=112 | sequence_SO=chromosome | SO=protein_coding_gene | is_pseudo=false	0	21.325	54	6	13	6	112	12.6	8.29	38.35	6	0.951	1.092	1.061	1.066	1.071	1.089	0.952	1.105	1.156	4417.4	4199.7	4823	4688.6	4707.1	4732.1	4810.1	4204.7	4879.2	5107.3	4417.4	4199.7	4823	4688.6	4707.1	4732.1	4810.1	4204.7	4879.2	5107.3	High	High	High	High
-3.03742e+17	FALSE	High	IsMasterProtein	TGGT1_258360-t26_1-p1	transcript=TGGT1_258360-t26_1 | gene=TGGT1_258360 | organism=Toxoplasma_gondii_GT1 | gene_product=hypothetical protein | transcript_product=hypothetical protein | location=TGGT1_chrVIIb:3419215-3422759(-) | protein_length=537 | sequence_SO=chromosome | SO=protein_coding_gene | is_pseudo=false	0	96.846	38	20	34	19	537	58.9	5.03	120.66	20	0.951	1.038	1.031	1.014	1.033	1.041	1.005	0.979	0.996	15155.5	14411.9	15732.7	15628.2	15367.3	15649.5	15782.2	15225.2	14836.1	15099.1	15155.5	14411.9	15732.7	15628.2	15367.3	15649.5	15782.2	15225.2	14836.1	15099.1	High	High	High	High
-6.14478e+18	FALSE	High	IsMasterProtein	TGGT1_286650-t26_1-p1	transcript=TGGT1_286650-t26_1 | gene=TGGT1_286650 | organism=Toxoplasma_gondii_GT1 | gene_product=hypothetical protein | transcript_product=hypothetical protein | location=TGGT1_chrV:1595089-1595646(-) | protein_length=185 | sequence_SO=chromosome | SO=protein_coding_gene | is_pseudo=false	0	23.609	24	5	10	5	185	20.2	9.16	36.54	5	0.951	0.961	1	1.003	1.006	1.035	1.046	1.032	0.989	2504.5	2381.6	2405.6	2503.9	2513	2520.7	2592.5	2619.4	2585.1	2477.9	2504.5	2381.6	2405.6	2503.9	2513	2520.7	2592.5	2619.4	2585.1	2477.9	High	High	High	High
6.21944e+18	FALSE	High	IsMasterProtein	TGGT1_235700-t26_1-p1	transcript=TGGT1_235700-t26_1 | gene=TGGT1_235700 | organism=Toxoplasma_gondii_GT1 | gene_product=FBPase domain-containing protein [Source:UniProtKB/TrEMBL;Acc:A0A125YJ67] | transcript_product=sedoheptulose-1,7-bisphosphatase | location=TGGT1_chrX:4954156-4957661(-) | protein_length=330 | sequence_SO=chromosome | SO=protein_coding_gene | is_pseudo=false	0	28.293	19	5	5	5	330	35.8	5.55	20.53	5	0.951	1.014	1.047	1.017	1.025	1.043	0.847	0.723	0.666	2410.8	2292.6	2443.8	2524.5	2452.1	2470.9	2513.4	2041.7	1742.3	1605.2	2410.8	2292.6	2443.8	2524.5	2452.1	2470.9	2513.4	2041.7	1742.3	1605.2	High	High	High	High
4.99221e+18	FALSE	High	IsMasterProtein	TGGT1_301160-t26_1-p1	transcript=TGGT1_301160-t26_1 | gene=TGGT1_301160 | organism=Toxoplasma_gondii_GT1 | gene_product=SAG-related sequence SRS19C [Source:UniProtKB/TrEMBL;Acc:S7UHG9] | transcript_product=SAG-related sequence SRS19C | location=TGGT1_chrIV:2175696-2176886(-) | protein_length=396 | sequence_SO=chromosome | SO=protein_coding_gene | is_pseudo=false	0	36.218	17	5	12	5	396	41.8	6.09	50	5	0.951	1.018	1.015	0.994	1.033	1.021	0.99	0.934	0.984	3172.4	3017	3229.2	3219.6	3154.8	3278	3237.6	3140.6	2963.9	3120.8	3172.4	3017	3229.2	3219.6	3154.8	3278	3237.6	3140.6	2963.9	3120.8	High	High	High	High
-6.69586e+17	FALSE	High	IsMasterProtein	TGGT1_205340-t26_1-p1	transcript=TGGT1_205340-t26_1 | gene=TGGT1_205340 | organism=Toxoplasma_gondii_GT1 | gene_product=40S ribosomal protein S12 [Source:UniProtKB/TrEMBL;Acc:A0A125YN62] | transcript_product=ribosomal protein RPS12 | location=TGGT1_chrVIIa:1379775-1380954(+) | protein_length=142 | sequence_SO=chromosome | SO=protein_coding_gene | is_pseudo=false	0	183.232	76	13	120	13	142	15.4	5.01	461.86	13	0.951	1.04	1.04	1.015	1.045	1.065	0.86	0.952	0.981	37051	35245.2	38547.6	38545.4	37598.7	38724.8	39473.5	31867	35275.7	36352.4	37051	35245.2	38547.6	38545.4	37598.7	38724.8	39473.5	31867	35275.7	36352.4	High	High	High	High
-4.9823e+18	FALSE	High	IsMasterProtein	TGGT1_258470-t26_1-p1	transcript=TGGT1_258470-t26_1 | gene=TGGT1_258470 | organism=Toxoplasma_gondii_GT1 | gene_product=hypothetical protein | transcript_product=hypothetical protein | location=TGGT1_chrVIIb:3369823-3371292(+) | protein_length=284 | sequence_SO=chromosome | SO=protein_coding_gene | is_pseudo=false	0.001	5.456	7	2	3	2	284	31.7	7.8	8.19	2	0.951	1.072	1.161	1.203	1.092	1.163	1.147	1.038	1.103	2022.4	1924.1	2167.4	2348.1	2432.1	2209	2352	2319.6	2100	2231.3	2022.4	1924.1	2167.4	2348.1	2432.1	2209	2352	2319.6	2100	2231.3	High	High	High	High
-5.9068e+18	FALSE	High	IsMasterProtein	TGGT1_210810-t26_1-p1	transcript=TGGT1_210810-t26_1 | gene=TGGT1_210810 | organism=Toxoplasma_gondii_GT1 | gene_product=hypothetical protein | transcript_product=hypothetical protein | location=TGGT1_chrIV:1968347-1970259(+) | protein_length=107 | sequence_SO=chromosome | SO=protein_coding_gene | is_pseudo=false	0	8.634	17	2	2	2	107	11.9	5.5	6.31	2	0.951	1.198	1.142	1.126	1.211	1.24	1.215	1.349	1.557	1268.8	1207.1	1520.3	1448.6	1428.1	1536.9	1573.4	1541.8	1711.7	1975.4	1268.8	1207.1	1520.3	1448.6	1428.1	1536.9	1573.4	1541.8	1711.7	1975.4	High	High	High	High
-5.44088e+18	FALSE	High	IsMasterProtein	TGGT1_315490-t26_1-p1	transcript=TGGT1_315490-t26_1 | gene=TGGT1_315490 | organism=Toxoplasma_gondii_GT1 | gene_product=Rhoptry protein ROP10 [Source:UniProtKB/TrEMBL;Acc:S7VV52] | transcript_product=rhoptry protein ROP10 | location=TGGT1_chrXI:4696632-4698392(-) | protein_length=586 | sequence_SO=chromosome | SO=protein_coding_gene | is_pseudo=false	0	110.645	34	14	54	14	586	60.8	4.32	225.82	14	0.951	1.001	1.015	1.01	1.008	1.022	0.817	0.96	0.966	17040.3	16212.1	17062.7	17296.1	17207.2	17180.6	17419.8	13914	16362	16467.5	17040.3	16212.1	17062.7	17296.1	17207.2	17180.6	17419.8	13914	16362	16467.5	High	High	High	High
-4.88033e+18	FALSE	High	IsMasterProtein	TGGT1_226800-t26_1-p1	transcript=TGGT1_226800-t26_1 | gene=TGGT1_226800 | organism=Toxoplasma_gondii_GT1 | gene_product=GSH_synthase domain-containing protein [Source:UniProtKB/TrEMBL;Acc:S7UWP8] | transcript_product=eukaryotic glutathione synthase, atp binding domain-containing protein | location=TGGT1_chrX:1260324-1264727(-) | protein_length=1467 | sequence_SO=chromosome | SO=protein_coding_gene | is_pseudo=false	0	6.004	2	2	2	2	1467	160.5	7.36	5.65	2	0.952	0.948	1.188	1.092	1.047	1.18	1.255	0.976	0.947	163.2	155.3	154.6	193.9	178.2	170.9	192.5	204.7	159.3	154.5	163.2	155.3	154.6	193.9	178.2	170.9	192.5	204.7	159.3	154.5	High	High	High	High
-7.42665e+18	FALSE	High	IsMasterProtein	TGGT1_214790-t26_1-p1	transcript=TGGT1_214790-t26_1 | gene=TGGT1_214790 | organism=Toxoplasma_gondii_GT1 | gene_product=Glycoprotein [Source:UniProtKB/TrEMBL;Acc:A0A125YXQ6] | transcript_product=glycoprotein | location=TGGT1_chrX:6386376-6388397(+) | protein_length=283 | sequence_SO=chromosome | SO=protein_coding_gene | is_pseudo=false	0	70.589	30	8	68	8	283	31.4	4.77	218.18	8	0.952	0.982	1.027	0.979	1.018	1.016	0.896	0.894	0.871	21130.9	20111.2	20742.1	21695.6	20684.4	21501.5	21473.8	18940.4	18886.2	18396.9	21130.9	20111.2	20742.1	21695.6	20684.4	21501.5	21473.8	18940.4	18886.2	18396.9	High	High	High	High
8.00852e+18	FALSE	High	IsMasterProtein	TGGT1_301480A-t26_1-p1	transcript=TGGT1_301480A-t26_1 | gene=TGGT1_301480A | organism=Toxoplasma_gondii_GT1 | gene_product=hypothetical protein | transcript_product=hypothetical protein | location=AAQM03000332:604-2331(+) | protein_length=576 | sequence_SO=contig | SO=protein_coding_gene | is_pseudo=false	0	16.355	5	2	5	2	576	58.8	4.64	21.73	2	0.952	0.93	0.959	1.056	0.994	1.021	1.042	0.906	0.983	538.4	512.4	500.8	516.3	568.6	534.9	549.6	560.9	488.1	529.1	538.4	512.4	500.8	516.3	568.6	534.9	549.6	560.9	488.1	529.1	High	High	High	High
-3.7347e+18	FALSE	High	IsMasterProtein	TGGT1_220270-t26_1-p1	transcript=TGGT1_220270-t26_1 | gene=TGGT1_220270 | organism=Toxoplasma_gondii_GT1 | gene_product=Alveolin domain containing intermediate filament IMC6 [Source:UniProtKB/TrEMBL;Acc:S7VPD3] | transcript_product=alveolin domain containing intermediate filament IMC6 | location=TGGT1_chrV:152699-154033(-) | protein_length=444 | sequence_SO=chromosome | SO=protein_coding_gene | is_pseudo=false	0	19.196	14	5	12	5	444	48.6	5.1	33.61	5	0.952	1	1.063	1.083	1.008	1.055	0.935	0.931	0.949	2060	1960.8	2059.5	2190.8	2231.7	2075.7	2174.3	1925.1	1918.6	1955.5	2060	1960.8	2059.5	2190.8	2231.7	2075.7	2174.3	1925.1	1918.6	1955.5	High	High	High	High
8.87237e+18	FALSE	High	IsMasterProtein	TGGT1_216720-t26_1-p1	transcript=TGGT1_216720-t26_1 | gene=TGGT1_216720 | organism=Toxoplasma_gondii_GT1 | gene_product=hypothetical protein | transcript_product=hypothetical protein | location=TGGT1_chrXI:5865264-5865815(+) | protein_length=183 | sequence_SO=chromosome | SO=protein_coding_gene | is_pseudo=false	0	13.507	15	3	3	3	183	20	6.54	10.95	3	0.952	1.044	0.996	0.972	1.024	0.983	0.958	1.037	1.036	1081.9	1029.8	1129	1077.2	1051.2	1108.4	1063.3	1036.4	1122.3	1120.8	1081.9	1029.8	1129	1077.2	1051.2	1108.4	1063.3	1036.4	1122.3	1120.8	High	High	High	High
-7.88042e+18	FALSE	High	IsMasterProtein	TGGT1_271050-t26_1-p1	transcript=TGGT1_271050-t26_1 | gene=TGGT1_271050 | organism=Toxoplasma_gondii_GT1 | gene_product=SAG domain-containing protein [Source:UniProtKB/TrEMBL;Acc:A0A125YVU5] | transcript_product=SAG-related sequence SRS34A | location=TGGT1_chrVIII:4754604-4755164(+) | protein_length=186 | sequence_SO=chromosome | SO=protein_coding_gene | is_pseudo=false	0	152.07	59	13	572	13	186	19	7.97	2091.7	13	0.952	1.059	1.091	0.987	1.041	1.046	0.911	1.004	0.959	137058	130475	145162	149544	135321	142684	143379	124799	137625	131461	137058	130475	145162	149544	135321	142684	143379	124799	137625	131461	High	High	High	High
5.27772e+18	FALSE	High	IsMasterProtein	TGGT1_293870-t26_1-p1	transcript=TGGT1_293870-t26_1 | gene=TGGT1_293870 | organism=Toxoplasma_gondii_GT1 | gene_product=Thioredoxin [Source:UniProtKB/TrEMBL;Acc:A0A125YIY2] | transcript_product=putative thioredoxin | location=TGGT1_chrIa:604538-605891(+) | protein_length=106 | sequence_SO=chromosome | SO=protein_coding_gene | is_pseudo=false	0	85.855	55	7	185	7	106	12	5.11	723.02	7	0.952	1.017	1.064	1.039	1.061	1.09	0.883	1.039	1.053	40806.9	38848.7	41501.4	43434.9	42383.4	43312.6	44485.6	36024.3	42390.3	42973.7	40806.9	38848.7	41501.4	43434.9	42383.4	43312.6	44485.6	36024.3	42390.3	42973.7	High	High	High	High
-6.5861e+18	FALSE	High	IsMasterProtein	TGGT1_262930-t26_1-p1	transcript=TGGT1_262930-t26_1 | gene=TGGT1_262930 | organism=Toxoplasma_gondii_GT1 | gene_product=Dolichol-phosphate mannosyltransferase subunit 3 [Source:UniProtKB/TrEMBL;Acc:A0A125YQ48] | transcript_product=hypothetical protein | location=TGGT1_chrVIIb:894005-895468(-) | protein_length=114 | sequence_SO=chromosome | SO=protein_coding_gene | is_pseudo=false	0	14.104	21	2	6	2	114	12.7	9.09	24.73	2	0.952	0.933	0.983	1.012	1.005	1.06	0.798	0.946	1.035	1716.1	1633.7	1601.5	1687.3	1737.5	1724.5	1819.4	1369.4	1623.4	1776.3	1716.1	1633.7	1601.5	1687.3	1737.5	1724.5	1819.4	1369.4	1623.4	1776.3	High	High	High	High
-7.58669e+18	FALSE	High	IsMasterProtein	TGGT1_247700-t26_1-p1	transcript=TGGT1_247700-t26_1 | gene=TGGT1_247700 | organism=Toxoplasma_gondii_GT1 | gene_product=AP2/ERF domain-containing protein [Source:UniProtKB/TrEMBL;Acc:S7V1L6] | transcript_product=AP2 domain transcription factor AP2XII-4 | location=TGGT1_chrXII:3439195-3451035(-) | protein_length=3831 | sequence_SO=chromosome | SO=protein_coding_gene | is_pseudo=false	0	10.663	1	4	8	4	3831	400.8	7.53	21.07	4	0.952	0.998	1.007	1.021	1.04	1.031	0.929	1.018	1.016	3509.5	3341.4	3503.2	3533.4	3582.7	3650.7	3617	3258.7	3571.7	3567	3509.5	3341.4	3503.2	3533.4	3582.7	3650.7	3617	3258.7	3571.7	3567	High	High	High	High
5.82095e+18	FALSE	High	IsMasterProtein	TGGT1_213030-t26_1-p1	transcript=TGGT1_213030-t26_1 | gene=TGGT1_213030 | organism=Toxoplasma_gondii_GT1 | gene_product=Clathrin light chain [Source:UniProtKB/TrEMBL;Acc:S7UPA7] | transcript_product=hypothetical protein | location=TGGT1_chrV:673145-674534(+) | protein_length=324 | sequence_SO=chromosome | SO=protein_coding_gene | is_pseudo=false	0	123.929	60	14	48	14	324	35.2	4.69	202.6	14	0.952	1.017	1.063	1.051	1.058	1.08	0.919	1.003	1.019	14704.3	14002.4	14959.7	15626	15447.6	15561.3	15881.7	13518.6	14753.3	14984.8	14704.3	14002.4	14959.7	15626	15447.6	15561.3	15881.7	13518.6	14753.3	14984.8	High	High	High	High
7.38164e+18	FALSE	High	IsMasterProtein	TGGT1_278530-t26_1-p1	transcript=TGGT1_278530-t26_1 | gene=TGGT1_278530 | organism=Toxoplasma_gondii_GT1 | gene_product=HTH cro/C1-type domain-containing protein [Source:UniProtKB/TrEMBL;Acc:A0A125YYC2] | transcript_product=putative multiprotein bridging factor type 1 family transcriptional co-activator | location=TGGT1_chrXII:5951968-5953739(+) | protein_length=144 | sequence_SO=chromosome | SO=protein_coding_gene | …	0	58.157	44	11	40	11	144	16.1	9.8	124.63	11	0.952	0.998	1.043	1.022	1.039	1.052	0.822	1.033	1.02	16687.2	15892.4	16661.9	17405.5	17059.6	17334.9	17554.5	13719.7	17239.4	17025	16687.2	15892.4	16661.9	17405.5	17059.6	17334.9	17554.5	13719.7	17239.4	17025	High	High	High	High
7.71588e+18	FALSE	High	IsMasterProtein	TGGT1_260440-t26_1-p1	transcript=TGGT1_260440-t26_1 | gene=TGGT1_260440 | organism=Toxoplasma_gondii_GT1 | gene_product=NPL domain-containing protein [Source:UniProtKB/TrEMBL;Acc:S7UYY1] | transcript_product=nuclear factor NF3 | location=TGGT1_chrVIIb:2242975-2247472(-) | protein_length=312 | sequence_SO=chromosome | SO=protein_coding_gene | is_pseudo=false	0	141.413	44	21	106	21	312	34.1	4.31	337.21	21	0.953	1.027	0.994	0.944	0.966	0.973	0.916	0.91	0.873	46974.1	44747.6	48251.2	46670.7	44326.6	45388	45683.5	43044.8	42730.5	41015	46974.1	44747.6	48251.2	46670.7	44326.6	45388	45683.5	43044.8	42730.5	41015	High	High	High	High
-2.4161e+18	FALSE	High	IsMasterProtein	TGGT1_251885-t26_1-p1	transcript=TGGT1_251885-t26_1 | gene=TGGT1_251885 | organism=Toxoplasma_gondii_GT1 | gene_product=hypothetical protein | transcript_product=hypothetical protein | location=TGGT1_chrXII:5562782-5564509(+) | protein_length=215 | sequence_SO=chromosome | SO=protein_coding_gene | is_pseudo=false	0	33.468	38	6	8	6	215	24.1	9.44	36.68	6	0.953	0.989	1.027	1.043	1.031	1.005	0.868	0.919	0.931	2997.6	2855.8	2965.4	3077.5	3126.7	3090.3	3013.5	2602.5	2755.2	2791.8	2997.6	2855.8	2965.4	3077.5	3126.7	3090.3	3013.5	2602.5	2755.2	2791.8	High	High	High	High
-8.72813e+17	FALSE	High	IsMasterProtein	TGGT1_310180-t26_1-p1	transcript=TGGT1_310180-t26_1 | gene=TGGT1_310180 | organism=Toxoplasma_gondii_GT1 | gene_product=hypothetical protein | transcript_product=hypothetical protein | location=TGGT1_chrXI:1084986-1087575(+) | protein_length=92 | sequence_SO=chromosome | SO=protein_coding_gene | is_pseudo=false	0	8.234	23	2	6	2	92	10.4	8.18	22.57	2	0.953	0.794	0.937	0.976	0.969	0.961	0.731	0.942	1.065	2420.6	2306.6	1921.3	2268.7	2361.3	2344.6	2325.7	1768.9	2279.5	2578.5	2420.6	2306.6	1921.3	2268.7	2361.3	2344.6	2325.7	1768.9	2279.5	2578.5	High	High	High	High
6.84036e+17	FALSE	High	IsMasterProtein	TGGT1_311110-t26_1-p1	transcript=TGGT1_311110-t26_1 | gene=TGGT1_311110 | organism=Toxoplasma_gondii_GT1 | gene_product=Putative Ubiquitin-fold modifier 1 family protein [Source:UniProtKB/TrEMBL;Acc:A0A125YFZ1] | transcript_product=putative Ubiquitin-fold modifier 1 precursor family protein | location=TGGT1_chrXI:1777787-1778994(+) | protein_length=91 | sequence_SO=chromosome | SO=protein_coding_gene | is_pseudo=false	0	14.747	33	3	10	3	91	9.5	8.91	32.97	3	0.953	0.958	0.999	1.008	1.032	1.034	0.828	0.973	0.982	5566.9	5305	5331.6	5558.9	5608.9	5745.1	5755.2	4608.3	5414.1	5466.1	5566.9	5305	5331.6	5558.9	5608.9	5745.1	5755.2	4608.3	5414.1	5466.1	High	High	High	High
7.05303e+18	FALSE	High	IsMasterProtein	TGGT1_267740-t26_1-p1	transcript=TGGT1_267740-t26_1 | gene=TGGT1_267740 | organism=Toxoplasma_gondii_GT1 | gene_product=hypothetical protein | transcript_product=hypothetical protein | location=TGGT1_chrIX:229747-230769(+) | protein_length=340 | sequence_SO=chromosome | SO=protein_coding_gene | is_pseudo=false	0	17.68	13	3	3	3	340	37	9.36	8.94	3	0.953	1.085	1.104	1.068	1.096	1.087	1.092	1.127	1.031	848.9	809.1	920.7	937.1	906.5	930	923.2	927	956.8	874.8	848.9	809.1	920.7	937.1	906.5	930	923.2	927	956.8	874.8	High	High	High	High
7.71553e+16	FALSE	High	IsMasterProtein	TGGT1_285230-t26_1-p1	transcript=TGGT1_285230-t26_1 | gene=TGGT1_285230 | organism=Toxoplasma_gondii_GT1 | gene_product=PRP38 family protein [Source:UniProtKB/TrEMBL;Acc:A0A125YPV8] | transcript_product=PRP38 family protein | location=TGGT1_chrV:2356663-2366520(-) | protein_length=614 | sequence_SO=chromosome | SO=protein_coding_gene | is_pseudo=false	0	5.972	3	2	2	2	614	68.7	9.66	5.65	2	0.953	0.944	1.02	1.02	0.993	0.956	1.066	0.93	0.779	467.4	445.5	441.2	476.6	476.8	464.2	447	498.4	434.9	364.2	467.4	445.5	441.2	476.6	476.8	464.2	447	498.4	434.9	364.2	High	High	High	High
-7.63739e+18	FALSE	High	IsMasterProtein	TGGT1_248370-t26_1-p1	transcript=TGGT1_248370-t26_1 | gene=TGGT1_248370 | organism=Toxoplasma_gondii_GT1 | gene_product=Putative prefoldin subunit 6 [Source:UniProtKB/TrEMBL;Acc:A0A125YIJ0] | transcript_product=putative prefoldin subunit 6 | location=TGGT1_chrXII:3759827-3760756(+) | protein_length=123 | sequence_SO=chromosome | SO=protein_coding_gene | is_pseudo=false	0	40.008	47	7	19	7	123	14.4	8.1	65.18	7	0.953	1.042	1.041	1.026	1.06	1.059	0.8	1.021	1.116	10458.7	9969.1	10901.7	10889.6	10726.2	11087.8	11077.5	8367.8	10675.8	11672.4	10458.7	9969.1	10901.7	10889.6	10726.2	11087.8	11077.5	8367.8	10675.8	11672.4	High	High	High	High
-7.11706e+18	FALSE	High	IsMasterProtein	TGGT1_213940-t26_1-p1	transcript=TGGT1_213940-t26_1 | gene=TGGT1_213940 | organism=Toxoplasma_gondii_GT1 | gene_product=CHCH domain-containing protein [Source:UniProtKB/TrEMBL;Acc:A0A125YH05] | transcript_product=CHCH domain-containing protein | location=TGGT1_chrV:1321940-1324413(-) | protein_length=149 | sequence_SO=chromosome | SO=protein_coding_gene | is_pseudo=false	0	42.56	54	5	14	5	149	14.9	8.95	72.08	5	0.953	0.945	1.064	1.049	1.043	1.064	0.984	0.947	0.983	4205.6	4009.4	3976.3	4474.9	4411.4	4386.5	4476.7	4136.8	3983.5	4133	4205.6	4009.4	3976.3	4474.9	4411.4	4386.5	4476.7	4136.8	3983.5	4133	High	High	High	High
-1.74978e+18	FALSE	High	IsMasterProtein	TGGT1_218520-t26_1-p1	transcript=TGGT1_218520-t26_1 | gene=TGGT1_218520 | organism=Toxoplasma_gondii_GT1 | gene_product=Microneme protein MIC6 [Source:UniProtKB/TrEMBL;Acc:S7V1D9] | transcript_product=microneme protein MIC6 | location=TGGT1_chrXII:1418869-1419918(-) | protein_length=349 | sequence_SO=chromosome | SO=protein_coding_gene | is_pseudo=false	0	223.68	54	23	176	23	349	36.6	4.69	805.81	23	0.953	0.942	1.005	0.988	0.995	1.022	0.961	0.916	0.921	37575.8	35823.4	35414.2	37761.5	37112.5	37402.3	38409.5	36111.4	34411.5	34622.8	37575.8	35823.4	35414.2	37761.5	37112.5	37402.3	38409.5	36111.4	34411.5	34622.8	High	High	High	High
-4.36223e+18	FALSE	High	IsMasterProtein	TGGT1_205700-t26_1-p1	transcript=TGGT1_205700-t26_1 | gene=TGGT1_205700 | organism=Toxoplasma_gondii_GT1 | gene_product=PPIase cyclophilin-type domain-containing protein [Source:UniProtKB/TrEMBL;Acc:A0A125YTE9] | transcript_product=cyclophilin precursor | location=TGGT1_chrVIIa:1122121-1123167(+) | protein_length=348 | sequence_SO=chromosome | SO=protein_coding_gene | is_pseudo=false	0	109.574	43	14	185	12	348	38.2	8.75	550.68	14	0.954	0.902	0.989	0.936	0.986	0.966	0.584	0.925	0.89	57393.1	54736.6	51788.5	56774.5	53732.7	56605.2	55452.3	33513.4	53105.1	51099.4	57393.1	54736.6	51788.5	56774.5	53732.7	56605.2	55452.3	33513.4	53105.1	51099.4	High	High	High	High
-6.00719e+18	FALSE	High	IsMasterProtein	TGGT1_270120-t26_1-p1	transcript=TGGT1_270120-t26_1 | gene=TGGT1_270120 | organism=Toxoplasma_gondii_GT1 | gene_product=Thioredoxin domain-containing protein [Source:UniProtKB/TrEMBL;Acc:A0A125YR39] | transcript_product=thioredoxin-like protein TLP1 | location=TGGT1_chrVIII:5390053-5393229(+) | protein_length=244 | sequence_SO=chromosome | SO=protein_coding_gene | is_pseudo=false	0	56.71	23	7	22	7	244	26.9	8.25	83.54	7	0.954	1.065	1.05	1.018	1.056	1.076	0.89	0.966	1.002	9204.1	8778.2	9804.7	9659.7	9370.7	9721.5	9903.6	8188.2	8894	9218.1	9204.1	8778.2	9804.7	9659.7	9370.7	9721.5	9903.6	8188.2	8894	9218.1	High	High	High	High
6.04125e+18	FALSE	High	IsMasterProtein	TGGT1_214080-t26_1-p1	transcript=TGGT1_214080-t26_1 | gene=TGGT1_214080 | organism=Toxoplasma_gondii_GT1 | gene_product=Toxofilin [Source:UniProtKB/TrEMBL;Acc:A0A125YQJ5] | transcript_product=toxofilin | location=TGGT1_chrX:5904318-5905055(+) | protein_length=245 | sequence_SO=chromosome | SO=protein_coding_gene | is_pseudo=false	0	244.435	74	21	252	20	245	27.1	9.57	1024.81	21	0.954	0.978	1.032	1.02	1.036	1.062	0.82	0.978	0.992	61903.1	59041	60570.5	63896.4	63129.1	64102.1	65766.6	50775.5	60516.6	61422.7	61903.1	59041	60570.5	63896.4	63129.1	64102.1	65766.6	50775.5	60516.6	61422.7	High	High	High	High
7.45559e+18	FALSE	High	IsMasterProtein	TGGT1_319730-t26_1-p1	transcript=TGGT1_319730-t26_1 | gene=TGGT1_319730 | organism=Toxoplasma_gondii_GT1 | gene_product=YOU2 family C2C2 zinc finger protein [Source:UniProtKB/TrEMBL;Acc:A0A125YRU4] | transcript_product=YOU2 family C2C2 zinc finger protein | location=TGGT1_chrIV:701308-702682(-) | protein_length=149 | sequence_SO=chromosome | SO=protein_coding_gene | is_pseudo=false	0	57.086	72	12	36	12	149	17.1	6.33	123.7	12	0.954	1.05	1.04	1.023	1.077	1.101	0.793	1.002	1.097	14945.9	14255.1	15689.2	15549.5	15285.2	16101.1	16456.1	11857.1	14971.8	16399.1	14945.9	14255.1	15689.2	15549.5	15285.2	16101.1	16456.1	11857.1	14971.8	16399.1	High	High	High	High
-1.28876e+18	FALSE	High	IsMasterProtein	TGGT1_297800-t26_1-p1	transcript=TGGT1_297800-t26_1 | gene=TGGT1_297800 | organism=Toxoplasma_gondii_GT1 | gene_product=Structural maintenance of chromosomes protein [Source:UniProtKB/TrEMBL;Acc:S7UJW5] | transcript_product=RecF/RecN/SMC N terminal domain-containing protein | location=TGGT1_chrII:1983196-2001446(-) | protein_length=1225 | sequence_SO=chromosome | SO=protein_coding_gene | is_pseudo=false	0	8.874	2	2	7	2	1225	139.4	8.27	17.15	2	0.954	1.15	1.067	1.053	1.09	1.097	1.229	1.218	1.19	3999.5	3815	4600.9	4268.4	4210.9	4360.1	4387.6	4917	4871.6	4757.6	3999.5	3815	4600.9	4268.4	4210.9	4360.1	4387.6	4917	4871.6	4757.6	High	High	High	High
2.5709e+18	FALSE	High	IsMasterProtein	TGGT1_258100-t26_1-p1	transcript=TGGT1_258100-t26_1 | gene=TGGT1_258100 | organism=Toxoplasma_gondii_GT1 | gene_product=TPR repeat region protein [Source:UniProtKB/TrEMBL;Acc:S7W7F7] | transcript_product=TPR repeat region protein | location=TGGT1_chrVIIb:3539297-3541605(-) | protein_length=215 | sequence_SO=chromosome | SO=protein_coding_gene | is_pseudo=false	0	17.514	7	1	2	1	215	23.1	8.02	10.84	1	0.954	1.087	1.055	1.09	1.12	1.041	0.939	1.048	0.992	265.3	253.1	288.4	279.8	289.2	297.1	276.1	249.1	278.2	263.3	265.3	253.1	288.4	279.8	289.2	297.1	276.1	249.1	278.2	263.3	High	High	High	High
8.37865e+18	FALSE	High	IsMasterProtein	TGGT1_208530-t26_1-p1	transcript=TGGT1_208530-t26_1 | gene=TGGT1_208530 | organism=Toxoplasma_gondii_GT1 | gene_product=Nicotinate phosphoribosyltransferase [Source:UniProtKB/TrEMBL;Acc:S7UJM2] | transcript_product=nicotinate phosphoribosyltransferase | location=TGGT1_chrIb:766715-777045(+) | protein_length=589 | sequence_SO=chromosome | SO=protein_coding_gene | is_pseudo=false	0	72.362	25	13	40	13	589	65.5	7.14	144.93	13	0.954	0.965	0.989	0.992	1.011	1.027	1.012	1.001	0.99	13410.2	12795.2	12945	13266.3	13300.3	13561.6	13766	13565.2	13427.7	13277.9	13410.2	12795.2	12945	13266.3	13300.3	13561.6	13766	13565.2	13427.7	13277.9	High	High	High	High
-2.2683e+18	FALSE	High	IsMasterProtein	TGGT1_287170-t26_1-p1	transcript=TGGT1_287170-t26_1 | gene=TGGT1_287170 | organism=Toxoplasma_gondii_GT1 | gene_product=hypothetical protein | transcript_product=hypothetical protein | location=TGGT1_chrV:1407962-1410454(-) | protein_length=363 | sequence_SO=chromosome | SO=protein_coding_gene | is_pseudo=false	0	41.273	21	7	20	7	363	38.5	5.22	81.08	7	0.954	1.023	1.03	1.054	1.06	1.079	0.894	0.992	1.029	3583.3	3419.1	3664.1	3689.5	3776.3	3799.8	3866.3	3202.3	3555.5	3687.1	3583.3	3419.1	3664.1	3689.5	3776.3	3799.8	3866.3	3202.3	3555.5	3687.1	High	High	High	High
7.46073e+18	FALSE	High	IsMasterProtein	TGGT1_218600-t26_1-p1	transcript=TGGT1_218600-t26_1 | gene=TGGT1_218600 | organism=Toxoplasma_gondii_GT1 | gene_product=RRM domain-containing protein [Source:UniProtKB/TrEMBL;Acc:S7WHH5] | transcript_product=RNA recognition motif-containing protein | location=TGGT1_chrXII:1316835-1323130(+) | protein_length=752 | sequence_SO=chromosome | SO=protein_coding_gene | is_pseudo=false	0.003	2.911	1	1	2	1	752	84.1	10.21	4.69	1	0.954	1.02	0.934	1.475	1.012	1.092	1.176	1.05	1.162	61.2	58.4	62.4	57.1	90.2	61.9	66.8	71.9	64.2	71.1	61.2	58.4	62.4	57.1	90.2	61.9	66.8	71.9	64.2	71.1	High	High	High	High
1.5829e+18	FALSE	High	IsMasterProtein	TGGT1_211420-t26_1-p1	transcript=TGGT1_211420-t26_1 | gene=TGGT1_211420 | organism=Toxoplasma_gondii_GT1 | gene_product=RRM domain-containing protein [Source:UniProtKB/TrEMBL;Acc:S7VTD0] | transcript_product=RNA recognition motif-containing protein | location=TGGT1_chrIV:1661239-1664919(-) | protein_length=189 | sequence_SO=chromosome | SO=protein_coding_gene | is_pseudo=false	0	82.548	60	15	60	15	189	22.8	7.03	213.85	15	0.954	1.092	1.058	1.036	1.054	1.067	1.014	0.979	1.048	11117.1	10608.9	12140.9	11762.5	11522.6	11720.1	11866	11269	10880.1	11651.2	11117.1	10608.9	12140.9	11762.5	11522.6	11720.1	11866	11269	10880.1	11651.2	High	High	High	High
-1.46129e+18	FALSE	High	IsMasterProtein	TGGT1_255410-t26_1-p1	transcript=TGGT1_255410-t26_1 | gene=TGGT1_255410 | organism=Toxoplasma_gondii_GT1 | gene_product=hypothetical protein | transcript_product=hypothetical protein | location=TGGT1_chrVIIb:4749702-4751393(-) | protein_length=165 | sequence_SO=chromosome | SO=protein_coding_gene | is_pseudo=false	0	24.738	17	2	9	2	165	17.5	4.84	43.87	2	0.954	0.932	1.036	1.058	1.069	1.093	1.086	1.022	1.115	1823.5	1740.2	1699.4	1889.5	1929.9	1949.4	1992.4	1981.1	1864.5	2033.8	1823.5	1740.2	1699.4	1889.5	1929.9	1949.4	1992.4	1981.1	1864.5	2033.8	High	High	High	High
6.49246e+18	FALSE	High	IsMasterProtein	TGGT1_245490-t26_1-p1	transcript=TGGT1_245490-t26_1 | gene=TGGT1_245490 | organism=Toxoplasma_gondii_GT1 | gene_product=Microneme protein MIC8 [Source:UniProtKB/TrEMBL;Acc:A0A125YJZ7] | transcript_product=microneme protein MIC8 | location=TGGT1_chrXII:2242495-2244549(+) | protein_length=684 | sequence_SO=chromosome | SO=protein_coding_gene | is_pseudo=false	0	248.099	49	30	113	30	684	74.5	5.43	493	30	0.954	1.012	1.03	0.999	1.041	1.043	0.978	0.949	0.959	48280	46075.4	48849.7	49732.6	48214.9	50268	50358.3	47227.1	45809	46281.6	48280	46075.4	48849.7	49732.6	48214.9	50268	50358.3	47227.1	45809	46281.6	High	High	High	High
2.10235e+18	FALSE	High	IsMasterProtein	TGGT1_236270-t26_1-p1	transcript=TGGT1_236270-t26_1 | gene=TGGT1_236270 | organism=Toxoplasma_gondii_GT1 | gene_product=RING-type domain-containing protein [Source:UniProtKB/TrEMBL;Acc:S7URM1] | transcript_product=hypothetical protein | location=TGGT1_chrX:5261682-5264457(+) | protein_length=384 | sequence_SO=chromosome | SO=protein_coding_gene | is_pseudo=false	0	7.662	9	2	4	2	384	39.8	5.96	14.95	2	0.954	0.99	0.982	0.913	0.944	0.979	0.819	0.917	0.958	1946.7	1857.9	1927.8	1912	1776.5	1838.2	1905.4	1595.2	1785.3	1864.7	1946.7	1857.9	1927.8	1912	1776.5	1838.2	1905.4	1595.2	1785.3	1864.7	High	High	High	High
-3.17152e+18	FALSE	High	IsMasterProtein	TGGT1_261470-t26_1-p1	transcript=TGGT1_261470-t26_1 | gene=TGGT1_261470 | organism=Toxoplasma_gondii_GT1 | gene_product=Sm domain-containing protein [Source:UniProtKB/TrEMBL;Acc:S7W6X0] | transcript_product=putative U6 snRNA-associated Sm family protein LSm6 | location=TGGT1_chrVIIb:1697188-1698703(-) | protein_length=82 | sequence_SO=chromosome | SO=protein_coding_gene | is_pseudo=false	0	29.722	55	4	10	4	82	8.9	5.06	38.19	4	0.954	0.987	0.993	0.976	0.993	1.005	0.968	0.951	0.964	3193.2	3047.7	3153	3171.1	3116.2	3171.1	3208.4	3090.3	3035.4	3078.4	3193.2	3047.7	3153	3171.1	3116.2	3171.1	3208.4	3090.3	3035.4	3078.4	High	High	High	High
-4.62387e+17	FALSE	High	IsMasterProtein	TGGT1_277050-t26_1-p1	transcript=TGGT1_277050-t26_1 | gene=TGGT1_277050 | organism=Toxoplasma_gondii_GT1 | gene_product=SPRY domain-containing protein [Source:UniProtKB/TrEMBL;Acc:S7WFG8] | transcript_product=hypothetical protein | location=TGGT1_chrXII:6665124-6670775(+) | protein_length=1883 | sequence_SO=chromosome | SO=protein_coding_gene | is_pseudo=false	0.003	3.296	1	1	1	1	1883	202	8.81	3.82	1	0.955	0.995	1.114	1.087	1.031	1.06	1.307	1.023	0.915	86.4	82.4	86	96.2	93.9	89	91.6	112.9	88.4	79	86.4	82.4	86	96.2	93.9	89	91.6	112.9	88.4	79	High	High	High	High
3.15532e+18	FALSE	High	IsMasterProtein	TGGT1_308090-t26_1-p1	transcript=TGGT1_308090-t26_1 | gene=TGGT1_308090 | organism=Toxoplasma_gondii_GT1 | gene_product=Protein kinase domain-containing protein [Source:UniProtKB/TrEMBL;Acc:A0A125YX85] | transcript_product=rhoptry protein ROP5 | location=AAQM03000031:206-1855(-) | protein_length=549 | sequence_SO=contig | SO=protein_coding_gene | is_pseudo=false	0	421.754	73	33	746	16	549	60.7	9.25	2934.27	33	0.955	0.939	0.984	0.966	0.964	0.982	0.889	0.888	0.881	51433	49093.4	48312.9	50612.2	49660.1	49606.3	50506	45727.6	45691.3	45337.7	51433	49093.4	48312.9	50612.2	49660.1	49606.3	50506	45727.6	45691.3	45337.7	High	High	High	High
7.5134e+18	FALSE	High	IsMasterProtein	TGGT1_219300-t26_1-p1	transcript=TGGT1_219300-t26_1 | gene=TGGT1_219300 | organism=Toxoplasma_gondii_GT1 | gene_product=Ran binding protein [Source:UniProtKB/TrEMBL;Acc:A0A125YHI6] | transcript_product=ran binding protein | location=TGGT1_chrXII:925272-926375(+) | protein_length=367 | sequence_SO=chromosome | SO=protein_coding_gene | is_pseudo=false	0	25.537	28	6	9	6	367	38.4	11.08	35.24	6	0.955	1.012	1.032	1.046	1.034	1.065	0.967	0.976	0.687	1795.6	1714	1817.6	1853.2	1879	1856.5	1912.2	1737.2	1752.5	1233.4	1795.6	1714	1817.6	1853.2	1879	1856.5	1912.2	1737.2	1752.5	1233.4	High	High	High	High
4.02255e+18	FALSE	High	IsMasterProtein	TGGT1_211030-t26_1-p1	transcript=TGGT1_211030-t26_1 | gene=TGGT1_211030 | organism=Toxoplasma_gondii_GT1 | gene_product=hypothetical protein | transcript_product=hypothetical protein | location=TGGT1_chrIV:1889471-1891938(-) | protein_length=191 | sequence_SO=chromosome | SO=protein_coding_gene | is_pseudo=false	0	147.835	82	15	137	15	191	22.2	5.82	484.21	15	0.955	0.983	1.005	0.973	0.997	1.002	0.92	0.957	0.943	48757.7	46542	47942.1	49015.7	47438.7	48623.6	48850.7	44837.9	46636.8	45970.1	48757.7	46542	47942.1	49015.7	47438.7	48623.6	48850.7	44837.9	46636.8	45970.1	High	High	High	High
-4.25813e+18	FALSE	High	IsMasterProtein	TGGT1_220610-t26_1-p1	transcript=TGGT1_220610-t26_1 | gene=TGGT1_220610 | organism=Toxoplasma_gondii_GT1 | gene_product=PPM-type phosphatase domain-containing protein [Source:UniProtKB/TrEMBL;Acc:S7UH67] | transcript_product=protein phosphatase 2C domain-containing protein | location=TGGT1_chrV:387984-391883(-) | protein_length=548 | sequence_SO=chromosome | SO=protein_coding_gene | is_pseudo=false	0	6.392	3	2	4	2	548	58.1	6.15	13.02	2	0.955	0.921	0.955	0.982	0.989	1.008	1.077	0.969	0.973	2185.6	2087	2014	2086.9	2146.4	2160.8	2203.1	2354.3	2117	2127.5	2185.6	2087	2014	2086.9	2146.4	2160.8	2203.1	2354.3	2117	2127.5	High	High	High	High
-7.45081e+18	FALSE	High	IsMasterProtein	TGGT1_221710-t26_1-p1	transcript=TGGT1_221710-t26_1 | gene=TGGT1_221710 | organism=Toxoplasma_gondii_GT1 | gene_product=Rab-GAP TBC domain-containing protein [Source:UniProtKB/TrEMBL;Acc:S7VU19] | transcript_product=TBC domain-containing protein | location=TGGT1_chrII:581382-588632(-) | protein_length=1707 | sequence_SO=chromosome | SO=protein_coding_gene | is_pseudo=false	0.002	4.025	1	2	2	2	1707	181.9	5.76	5.22	2	0.955	0.901	0.972	1.322	1.019	0.973	1.203	0.786	1.087	251.1	239.9	226.3	244	332.1	256	244.4	302	197.5	273	251.1	239.9	226.3	244	332.1	256	244.4	302	197.5	273	High	High	High	High
-1.45415e+18	FALSE	Medium	IsMasterProtein	TGGT1_216435-t26_1-p1	transcript=TGGT1_216435-t26_1 | gene=TGGT1_216435 | organism=Toxoplasma_gondii_GT1 | gene_product=hypothetical protein | transcript_product=hypothetical protein | location=TGGT1_chrXI:6068037-6070827(+) | protein_length=350 | sequence_SO=chromosome | SO=protein_coding_gene | is_pseudo=false	0.018	1.731	2	1	1	1	350	38.3	10.49	2.65	1	0.955	1.009	1.054	1.032	1.026	1.025	0.999	0.955	0.792	680.6	650.1	686.4	717.6	702.4	698	697.7	680	649.9	539	680.6	650.1	686.4	717.6	702.4	698	697.7	680	649.9	539	High	High	High	High
6.39354e+17	FALSE	High	IsMasterProtein	TGGT1_285870-t26_1-p1	transcript=TGGT1_285870-t26_1 | gene=TGGT1_285870 | organism=Toxoplasma_gondii_GT1 | gene_product=SAG domain-containing protein [Source:UniProtKB/TrEMBL;Acc:S7UNS7] | transcript_product=SAG-related sequence SRS20A | location=TGGT1_chrV:2015649-2017548(-) | protein_length=328 | sequence_SO=chromosome | SO=protein_coding_gene | is_pseudo=false	0	146.033	61	16	114	16	328	34.9	7.77	448.99	16	0.955	1.054	1.038	1	1.026	1.032	0.948	0.983	0.97	49785.5	47554.2	52490.9	51670.5	49791.4	51096.8	51382.4	47197.5	48942.5	48294	49785.5	47554.2	52490.9	51670.5	49791.4	51096.8	51382.4	47197.5	48942.5	48294	High	High	High	High
4.0293e+18	FALSE	High	IsMasterProtein	TGGT1_286240-t26_1-p1	transcript=TGGT1_286240-t26_1 | gene=TGGT1_286240 | organism=Toxoplasma_gondii_GT1 | gene_product=BTB domain-containing protein [Source:UniProtKB/TrEMBL;Acc:A0A125YGP0] | transcript_product=putative kelch repeat protein | location=TGGT1_chrV:1748542-1751447(+) | protein_length=625 | sequence_SO=chromosome | SO=protein_coding_gene | is_pseudo=false	0	14.275	5	2	3	2	625	67.4	6.57	13.28	2	0.955	0.907	0.842	0.903	0.933	0.949	1.031	0.922	0.921	516.7	493.6	468.9	435.2	466.7	482	490.6	532.5	476.6	476	516.7	493.6	468.9	435.2	466.7	482	490.6	532.5	476.6	476	High	High	High	High
4.72816e+18	FALSE	High	IsMasterProtein	TGGT1_203990-t26_1-p1	transcript=TGGT1_203990-t26_1 | gene=TGGT1_203990 | organism=Toxoplasma_gondii_GT1 | gene_product=Rhoptry protein ROP12 [Source:UniProtKB/TrEMBL;Acc:S7UUD9] | transcript_product=rhoptry protein ROP12 | location=TGGT1_chrVIIa:1957210-1959051(-) | protein_length=236 | sequence_SO=chromosome | SO=protein_coding_gene | is_pseudo=false	0	74.679	44	6	56	6	236	25.4	4.61	225.44	6	0.955	0.957	0.969	0.986	0.963	0.969	0.909	0.94	0.976	11188.2	10688.8	10709.4	10837	11031.2	10775.2	10846.8	10169.5	10518.5	10916.4	11188.2	10688.8	10709.4	10837	11031.2	10775.2	10846.8	10169.5	10518.5	10916.4	High	High	High	High
-8.26904e+18	FALSE	High	IsMasterProtein	TGGT1_313640-t26_1-p1	transcript=TGGT1_313640-t26_1 | gene=TGGT1_313640 | organism=Toxoplasma_gondii_GT1 | gene_product=hypothetical protein | transcript_product=hypothetical protein | location=TGGT1_chrXI:3542451-3543056(+) | protein_length=201 | sequence_SO=chromosome | SO=protein_coding_gene | is_pseudo=false	0	77.502	42	8	46	8	201	22.3	6.39	180.79	8	0.955	0.985	1.008	0.982	1.005	0.994	0.878	0.874	0.928	18625.4	17794.1	18337.3	18772.7	18295.2	18726.8	18512.7	16355	16275.6	17283.3	18625.4	17794.1	18337.3	18772.7	18295.2	18726.8	18512.7	16355	16275.6	17283.3	High	High	High	High
7.83021e+18	FALSE	High	IsMasterProtein	TGGT1_216060-t26_1-p1	transcript=TGGT1_216060-t26_1 | gene=TGGT1_216060 | organism=Toxoplasma_gondii_GT1 | gene_product=hypothetical protein | transcript_product=hypothetical protein | location=TGGT1_chrXI:6344229-6346967(-) | protein_length=784 | sequence_SO=chromosome | SO=protein_coding_gene | is_pseudo=false	0	74.537	21	12	18	12	784	84.3	7.24	73.66	12	0.955	1.036	1.029	1.025	1.027	1.045	0.953	0.978	1.028	8898.2	8501.5	9221.8	9153.2	9124.6	9134.7	9300.6	8476.7	8706.3	9149	8898.2	8501.5	9221.8	9153.2	9124.6	9134.7	9300.6	8476.7	8706.3	9149	High	High	High	High
4.33608e+17	FALSE	High	IsMasterProtein	TGGT1_321680-t26_1-p1	transcript=TGGT1_321680-t26_1 | gene=TGGT1_321680 | organism=Toxoplasma_gondii_GT1 | gene_product=HABP4_PAI-RBP1 domain-containing protein [Source:UniProtKB/TrEMBL;Acc:A0A125YT80] | transcript_product=hypothetical protein | location=TGGT1_chrIb:1645852-1649258(-) | protein_length=372 | sequence_SO=chromosome | SO=protein_coding_gene | is_pseudo=false	0	254.209	55	27	133	27	372	40.7	6.16	597.71	27	0.956	1.056	1.053	1.027	1.037	1.045	0.947	1.017	1.029	42572.9	40687.2	44957.2	44839.7	43717.9	44164	44487.3	40332.5	43306.2	43817.8	42572.9	40687.2	44957.2	44839.7	43717.9	44164	44487.3	40332.5	43306.2	43817.8	High	High	High	High
-5.02134e+18	FALSE	High	IsMasterProtein	TGGT1_319620-t26_1-p1	transcript=TGGT1_319620-t26_1 | gene=TGGT1_319620 | organism=Toxoplasma_gondii_GT1 | gene_product=hypothetical protein | transcript_product=hypothetical protein | location=TGGT1_chrIV:769634-778192(+) | protein_length=878 | sequence_SO=chromosome | SO=protein_coding_gene | is_pseudo=false	0.003	2.964	1	1	2	1	878	94.7	6.83	4.81	1	0.956	0.81	0.933	1.013	0.984	0.95	1.173	1.001	0.839	90.5	86.5	73.3	84.5	91.7	89	86	106.2	90.6	75.9	90.5	86.5	73.3	84.5	91.7	89	86	106.2	90.6	75.9	High	High	High	High
1.70856e+18	FALSE	High	IsMasterProtein	TGGT1_311140-t26_1-p1	transcript=TGGT1_311140-t26_1 | gene=TGGT1_311140 | organism=Toxoplasma_gondii_GT1 | gene_product=hypothetical protein | transcript_product=hypothetical protein | location=TGGT1_chrXI:1780327-1790674(-) | protein_length=1718 | sequence_SO=chromosome | SO=protein_coding_gene | is_pseudo=false	0.002	3.751	1	1	1	1	1718	187.1	6	2.76	1	0.956	0.997	1.084	1.126	1.121	0.89	0.911	0.887	0.83	58.5	56	58.4	63.5	65.9	65.7	52.1	53.3	51.9	48.6	58.5	56	58.4	63.5	65.9	65.7	52.1	53.3	51.9	48.6	High	High	High	High
-7.21171e+17	FALSE	High	IsMasterProtein	TGGT1_202690-t26_1-p1	transcript=TGGT1_202690-t26_1 | gene=TGGT1_202690 | organism=Toxoplasma_gondii_GT1 | gene_product=TFIIS-type domain-containing protein [Source:UniProtKB/TrEMBL;Acc:S7UVK2] | transcript_product=DNA-directed RNA polymerase II RPB9 | location=TGGT1_chrVIIa:3001544-3004286(+) | protein_length=250 | sequence_SO=chromosome | SO=protein_coding_gene | is_pseudo=false	0	47.783	38	8	18	8	250	28.2	4.48	68.62	8	0.956	1.043	1.073	1.082	1.066	1.078	0.973	1.038	1.083	4112	3930.5	4287.4	4411.5	4447.4	4384	4433	4002	4268.7	4454.5	4112	3930.5	4287.4	4411.5	4447.4	4384	4433	4002	4268.7	4454.5	High	High	High	High
-7.29773e+18	FALSE	High	IsMasterProtein	TGGT1_254610-t26_1-p1	transcript=TGGT1_254610-t26_1 | gene=TGGT1_254610 | organism=Toxoplasma_gondii_GT1 | gene_product=Mitochondrial import inner membrane translocase subunit [Source:UniProtKB/TrEMBL;Acc:S7UMY1] | transcript_product=Tim10/DDP family zinc finger superfamily protein | location=TGGT1_chrIII:1837560-1838967(-) | protein_length=91 | sequence_SO=chromosome | SO=protein_coding_gene | is_pseudo=false	0	28.674	69	4	4	4	91	10.2	5.4	17.82	4	0.956	1.019	0.997	0.968	0.968	1.024	0.889	0.948	0.947	781.5	747.1	796.1	779.3	756.3	756.1	800.5	695	740.6	740	781.5	747.1	796.1	779.3	756.3	756.1	800.5	695	740.6	740	High	High	High	High
4.96355e+18	FALSE	High	IsMasterProtein	TGGT1_212860-t26_1-p1	transcript=TGGT1_212860-t26_1 | gene=TGGT1_212860 | organism=Toxoplasma_gondii_GT1 | gene_product=hypothetical protein | transcript_product=hypothetical protein | location=TGGT1_chrV:522401-525373(+) | protein_length=990 | sequence_SO=chromosome | SO=protein_coding_gene | is_pseudo=false	0	29.03	6	7	10	7	990	110.1	10.26	28.19	7	0.956	0.955	0.965	0.937	0.938	0.94	0.912	0.862	0.44	5045.7	4823.3	4817.5	4868.7	4728.1	4733.2	4744.6	4603.3	4350.5	2218.7	5045.7	4823.3	4817.5	4868.7	4728.1	4733.2	4744.6	4603.3	4350.5	2218.7	High	High	High	High
4.6736e+18	FALSE	High	IsMasterProtein	TGGT1_211040-t26_1-p1	transcript=TGGT1_211040-t26_1 | gene=TGGT1_211040 | organism=Toxoplasma_gondii_GT1 | gene_product=Protein transport protein Sec61 subunit beta [Source:UniProtKB/TrEMBL;Acc:A0A125YP58] | transcript_product=Sec61beta family protein | location=TGGT1_chrIV:1885778-1887505(+) | protein_length=99 | sequence_SO=chromosome | SO=protein_coding_gene | is_pseudo=false	0	32.829	44	4	32	4	99	10.1	10.87	116.04	4	0.956	0.955	0.999	0.956	0.98	0.985	0.662	0.898	0.898	13491.8	12898.1	12891	13482.4	12896	13226.8	13288	8928.9	12111.6	12114.9	13491.8	12898.1	12891	13482.4	12896	13226.8	13288	8928.9	12111.6	12114.9	High	High	High	High
3.27602e+18	FALSE	High	IsMasterProtein	TGGT1_289970-t26_1-p1	transcript=TGGT1_289970-t26_1 | gene=TGGT1_289970 | organism=Toxoplasma_gondii_GT1 | gene_product=hypothetical protein | transcript_product=hypothetical protein | location=TGGT1_chrIX:3366173-3367777(+) | protein_length=232 | sequence_SO=chromosome | SO=protein_coding_gene | is_pseudo=false	0	64.577	57	11	23	11	232	24.5	11.66	68.52	11	0.956	1.037	1.05	1.035	1.02	1.048	0.986	1.005	0.894	6642.6	6351.6	6885.2	6976.1	6873.5	6775.4	6963.9	6552.1	6673	5937.8	6642.6	6351.6	6885.2	6976.1	6873.5	6775.4	6963.9	6552.1	6673	5937.8	High	High	High	High
8.02558e+17	FALSE	High	IsMasterProtein	TGGT1_219150-t26_1-p1	transcript=TGGT1_219150-t26_1 | gene=TGGT1_219150 | organism=Toxoplasma_gondii_GT1 | gene_product=ZZ-type domain-containing protein [Source:UniProtKB/TrEMBL;Acc:S7WAE6] | transcript_product=zinc finger, zz type domain-containing protein | location=TGGT1_chrXII:1042433-1047423(-) | protein_length=843 | sequence_SO=chromosome | SO=protein_coding_gene | is_pseudo=false	0	56.888	13	8	10	8	843	96	5.34	47.43	8	0.956	1.019	1.041	1.019	1.006	1.047	0.965	0.962	0.528	3312	3167.1	3374.1	3447.2	3373.8	3331.1	3469.1	3194.8	3186.7	1747.3	3312	3167.1	3374.1	3447.2	3373.8	3331.1	3469.1	3194.8	3186.7	1747.3	High	High	High	High
7.21478e+18	FALSE	High	IsMasterProtein	TGGT1_233460-t26_1-p1	transcript=TGGT1_233460-t26_1 | gene=TGGT1_233460 | organism=Toxoplasma_gondii_GT1 | gene_product=SAG-related sequence SRS29B [Source:UniProtKB/TrEMBL;Acc:A0A125YG48] | transcript_product=SAG-related sequence SRS29B | location=TGGT1_chrVIII:2660455-2661465(+) | protein_length=336 | sequence_SO=chromosome | SO=protein_coding_gene | is_pseudo=false	0	346.961	70	22	1193	22	336	34.8	8.02	4846.01	22	0.956	1.015	1.067	1.003	1.042	1.068	0.95	0.984	0.945	265714	254116	269747	283474	266426	276813	283759	252521	261417	251158	265714	254116	269747	283474	266426	276813	283759	252521	261417	251158	High	High	High	High
-8.46366e+18	FALSE	High	IsMasterProtein	TGGT1_270560-t26_1-p1	transcript=TGGT1_270560-t26_1 | gene=TGGT1_270560 | organism=Toxoplasma_gondii_GT1 | gene_product=Peptidyl-prolyl cis-trans isomerase [Source:UniProtKB/TrEMBL;Acc:A0A125YV50] | transcript_product=peptidyl-prolyl cis-trans isomerase family 1 | location=TGGT1_chrVIII:5188031-5189216(+) | protein_length=195 | sequence_SO=chromosome | SO=protein_coding_gene | is_pseudo=false	0	26.016	21	3	7	3	195	20.8	7.42	21.33	3	0.956	1.07	1.032	1.028	1.063	1.013	1.038	1.016	1.048	1119.7	1070.9	1198.4	1156	1151.4	1189.9	1134.2	1162.7	1138	1173.2	1119.7	1070.9	1198.4	1156	1151.4	1189.9	1134.2	1162.7	1138	1173.2	High	High	High	High
1.97151e+18	FALSE	High	IsMasterProtein	TGGT1_264970-t26_1-p1	transcript=TGGT1_264970-t26_1 | gene=TGGT1_264970 | organism=Toxoplasma_gondii_GT1 | gene_product=hypothetical protein | transcript_product=hypothetical protein | location=TGGT1_chrIX:1693077-1700464(+) | protein_length=1299 | sequence_SO=chromosome | SO=protein_coding_gene | is_pseudo=false	0	15.162	3	2	2	2	1299	139.2	5.58	10.35	2	0.956	0.961	0.888	1.007	0.947	1.009	1.006	0.974	0.886	120.8	115.5	116.1	107.3	121.6	114.3	121.8	121.6	117.7	107.1	120.8	115.5	116.1	107.3	121.6	114.3	121.8	121.6	117.7	107.1	High	High	High	High
5.17886e+17	FALSE	High	IsMasterProtein	TGGT1_297430-t26_1-p1	transcript=TGGT1_297430-t26_1 | gene=TGGT1_297430 | organism=Toxoplasma_gondii_GT1 | gene_product=FoP_duplication domain-containing protein [Source:UniProtKB/TrEMBL;Acc:S7UK03] | transcript_product=hypothetical protein | location=TGGT1_chrII:1749482-1752364(+) | protein_length=248 | sequence_SO=chromosome | SO=protein_coding_gene | is_pseudo=false	0	83.822	37	9	44	9	248	25.3	11.63	193.49	9	0.957	0.986	1.01	1.01	1.011	1.025	0.992	1.023	1.085	12524.5	11980	12354.1	12651.5	12643.7	12667	12834.6	12428.6	12813.4	13583.1	12524.5	11980	12354.1	12651.5	12643.7	12667	12834.6	12428.6	12813.4	13583.1	High	High	High	High
-7.99698e+18	FALSE	High	IsMasterProtein	TGGT1_207170-t26_1-p1	transcript=TGGT1_207170-t26_1 | gene=TGGT1_207170 | organism=Toxoplasma_gondii_GT1 | gene_product=hypothetical protein | transcript_product=hypothetical protein | location=TGGT1_chrX:7297038-7299283(+) | protein_length=141 | sequence_SO=chromosome | SO=protein_coding_gene | is_pseudo=false	0	24.514	38	4	29	4	141	15.2	10.4	107.47	4	0.957	1.008	1.015	0.989	0.998	1.001	0.738	0.932	0.985	11109.1	10626.4	11194.4	11273.9	10983.7	11082.3	11125	8195.1	10355.2	10942.3	11109.1	10626.4	11194.4	11273.9	10983.7	11082.3	11125	8195.1	10355.2	10942.3	High	High	High	High
3.18954e+18	FALSE	High	IsMasterProtein	TGGT1_295350-t26_1-p1	transcript=TGGT1_295350-t26_1 | gene=TGGT1_295350 | organism=Toxoplasma_gondii_GT1 | gene_product=Nucleoside diphosphate kinase [Source:UniProtKB/TrEMBL;Acc:A0A125YXT7] | transcript_product=putative nucleoside diphosphate kinase | location=TGGT1_chrIa:1794066-1795458(-) | protein_length=155 | sequence_SO=chromosome | SO=protein_coding_gene | is_pseudo=false	0	99.17	68	11	45	11	155	17.6	6.79	182.39	11	0.957	0.932	1.073	1.19	1.213	1.275	1.066	1.316	1.548	11003	10527.1	10256	11803.7	13095.8	13352	14028.5	11730.9	14477.8	17033.2	11003	10527.1	10256	11803.7	13095.8	13352	14028.5	11730.9	14477.8	17033.2	High	High	High	High
3.06501e+17	FALSE	High	IsMasterProtein	TGGT1_215040-t26_1-p1	transcript=TGGT1_215040-t26_1 | gene=TGGT1_215040 | organism=Toxoplasma_gondii_GT1 | gene_product=TIP120 domain-containing protein [Source:UniProtKB/TrEMBL;Acc:S7VZF7] | transcript_product=HEAT repeat-containing protein | location=TGGT1_chrX:6593584-6609735(-) | protein_length=1697 | sequence_SO=chromosome | SO=protein_coding_gene | is_pseudo=false	0	19.141	4	5	6	5	1697	181.8	5.3	16.39	5	0.957	0.993	1.071	1.12	1.119	1.04	1.108	1.148	1.088	718.5	687.5	713.4	769.4	805	804.4	747.3	796.1	824.6	781.4	718.5	687.5	713.4	769.4	805	804.4	747.3	796.1	824.6	781.4	High	High	High	High
2.65635e+18	FALSE	High	IsMasterProtein	TGGT1_225840-t26_1-p1	transcript=TGGT1_225840-t26_1 | gene=TGGT1_225840 | organism=Toxoplasma_gondii_GT1 | gene_product=hypothetical protein | transcript_product=hypothetical protein | location=TGGT1_chrX:1921606-1924485(+) | protein_length=686 | sequence_SO=chromosome | SO=protein_coding_gene | is_pseudo=false	0	6.338	2	1	1	1	686	73.3	4.91	3.97	1	0.957	0.935	0.808	1.018	0.874	0.981	1.123	1.055	0.958	74.6	71.4	69.7	60.3	76	65.2	73.2	83.8	78.7	71.5	74.6	71.4	69.7	60.3	76	65.2	73.2	83.8	78.7	71.5	High	High	High	High
-3.49425e+18	FALSE	High	IsMasterProtein	TGGT1_294330-t26_1-p1	transcript=TGGT1_294330-t26_1 | gene=TGGT1_294330 | organism=Toxoplasma_gondii_GT1 | gene_product=EGF family domain-containing protein [Source:UniProtKB/TrEMBL;Acc:S7UIL3] | transcript_product=EGF family domain-containing protein | location=TGGT1_chrIa:788197-794012(+) | protein_length=1148 | sequence_SO=chromosome | SO=protein_coding_gene | is_pseudo=false	0	64.403	10	10	15	10	1148	122.7	5.3	62.22	10	0.957	0.98	1.01	1.023	1.016	1.027	1.001	0.956	0.982	5474.6	5239.6	5367	5531.7	5599	5561.7	5624.2	5480.3	5234.9	5376.7	5474.6	5239.6	5367	5531.7	5599	5561.7	5624.2	5480.3	5234.9	5376.7	High	High	High	High
-1.72947e+18	FALSE	High	IsMasterProtein	TGGT1_230210-t26_1-p1	transcript=TGGT1_230210-t26_1 | gene=TGGT1_230210 | organism=Toxoplasma_gondii_GT1 | gene_product=Alveolin domain containing intermediate filament IMC10 [Source:UniProtKB/TrEMBL;Acc:S7WBA5] | transcript_product=alveolin domain containing intermediate filament IMC10 | location=TGGT1_chrVIII:682439-685345(+) | protein_length=560 | sequence_SO=chromosome | SO=protein_coding_gene | is_pseudo=false	0	196.926	45	20	92	18	560	61.1	4.79	372.28	20	0.957	1.017	1.065	1.066	1.049	1.059	0.9	0.963	0.988	22644.5	21675.1	23031.7	24107.1	24130	23765.2	23980.1	20378.6	21816.2	22366.7	22644.5	21675.1	23031.7	24107.1	24130	23765.2	23980.1	20378.6	21816.2	22366.7	High	High	High	High
5.95403e+18	FALSE	High	IsMasterProtein	TGGT1_245450-t26_1-p1	transcript=TGGT1_245450-t26_1 | gene=TGGT1_245450 | organism=Toxoplasma_gondii_GT1 | gene_product=hypothetical protein | transcript_product=hypothetical protein | location=TGGT1_chrXII:2216329-2217608(+) | protein_length=134 | sequence_SO=chromosome | SO=protein_coding_gene | is_pseudo=false	0	16.905	35	6	15	6	134	15.4	7.43	41.97	6	0.957	1.036	1.019	1.007	1.025	1.051	0.885	0.957	1.072	7211.2	6902.7	7471.2	7348.4	7258.9	7392.5	7578.2	6385.2	6902.3	7731.9	7211.2	6902.7	7471.2	7348.4	7258.9	7392.5	7578.2	6385.2	6902.3	7731.9	High	High	High	High
-8.62549e+18	FALSE	High	IsMasterProtein	TGGT1_251840-t26_1-p1	transcript=TGGT1_251840-t26_1 | gene=TGGT1_251840 | organism=Toxoplasma_gondii_GT1 | gene_product=hypothetical protein | transcript_product=hypothetical protein | location=TGGT1_chrXII:5528592-5531006(+) | protein_length=477 | sequence_SO=chromosome | SO=protein_coding_gene | is_pseudo=false	0	6.112	5	3	3	3	477	51.1	4.92	7.59	3	0.957	0.968	0.984	1.004	0.994	1.009	0.889	0.929	0.975	921.5	882.1	892.4	906.5	924.9	915.7	930	819.7	856.2	898.8	921.5	882.1	892.4	906.5	924.9	915.7	930	819.7	856.2	898.8	High	High	High	High
-9.07674e+18	FALSE	High	IsMasterProtein	TGGT1_207930-t26_1-p1	transcript=TGGT1_207930-t26_1 | gene=TGGT1_207930 | organism=Toxoplasma_gondii_GT1 | gene_product=Phosphatidylethanolamine-binding protein [Source:UniProtKB/TrEMBL;Acc:S7UJQ8] | transcript_product=phosphatidylethanolamine-binding protein | location=TGGT1_chrIb:459678-462290(-) | protein_length=207 | sequence_SO=chromosome | SO=protein_coding_gene | is_pseudo=false	0	16.868	16	3	6	3	207	22.6	8.72	15.06	3	0.957	1.004	0.998	1.002	1.013	1.013	0.908	1.023	1.024	1875	1794.9	1881.8	1871.9	1878.1	1899.6	1899	1701.8	1917.3	1919.7	1875	1794.9	1881.8	1871.9	1878.1	1899.6	1899	1701.8	1917.3	1919.7	High	High	High	High
-4.03931e+18	FALSE	Medium	IsMasterProtein	TGGT1_311080-t26_1-p1	transcript=TGGT1_311080-t26_1 | gene=TGGT1_311080 | organism=Toxoplasma_gondii_GT1 | gene_product=Ion_trans domain-containing protein [Source:UniProtKB/TrEMBL;Acc:S7W232] | transcript_product=transporter, cation channel family protein | location=TGGT1_chrXI:1748172-1757111(-) | protein_length=1502 | sequence_SO=chromosome | SO=protein_coding_gene | is_pseudo=false	0.015	1.783	1	1	6	1	1502	160.1	6.73	11.44	1	0.957	1.014	1.1	1.023	1.119	1.095	1.208	1.343	1.326	565.3	541.1	573.2	621.7	578.2	632.7	618.8	682.7	759.2	749.4	565.3	541.1	573.2	621.7	578.2	632.7	618.8	682.7	759.2	749.4	High	High	High	High
-6.86445e+18	FALSE	High	IsMasterProtein	TGGT1_229930-t26_1-p1	transcript=TGGT1_229930-t26_1 | gene=TGGT1_229930 | organism=Toxoplasma_gondii_GT1 | gene_product=p25-alpha family protein [Source:UniProtKB/TrEMBL;Acc:A0A125YYS4] | transcript_product=p25-alpha family protein | location=TGGT1_chrVIII:470700-471465(+) | protein_length=163 | sequence_SO=chromosome | SO=protein_coding_gene | is_pseudo=false	0	72.028	49	7	38	7	163	17.3	8.32	159.36	7	0.957	1.067	1.065	1.037	1.085	1.099	0.87	1.027	1.067	13836.4	13247	14767.1	14735.2	14345	15011.7	15207	12036.2	14214.1	14758.1	13836.4	13247	14767.1	14735.2	14345	15011.7	15207	12036.2	14214.1	14758.1	High	High	High	High
6.42656e+18	FALSE	High	IsMasterProtein	TGGT1_260140-t26_1-p1	transcript=TGGT1_260140-t26_1 | gene=TGGT1_260140 | organism=Toxoplasma_gondii_GT1 | gene_product=Phosphomannose isomerase type I protein [Source:UniProtKB/TrEMBL;Acc:S7UYK9] | transcript_product=phosphomannose isomerase type I protein | location=TGGT1_chrVIIb:2482518-2486228(-) | protein_length=756 | sequence_SO=chromosome | SO=protein_coding_gene | is_pseudo=false	0	25.903	8	5	6	5	756	82.1	6.89	21.41	5	0.957	1.051	1.033	1.121	1.049	1.021	1.117	1.045	1.07	359.9	344.6	378.2	371.7	403.3	377.7	367.5	402.2	376	385	359.9	344.6	378.2	371.7	403.3	377.7	367.5	402.2	376	385	High	High	High	High
-5.84552e+18	FALSE	High	IsMasterProtein	TGGT1_260820-t26_1-p1	transcript=TGGT1_260820-t26_1 | gene=TGGT1_260820 | organism=Toxoplasma_gondii_GT1 | gene_product=ISP1_C domain-containing protein [Source:UniProtKB/TrEMBL;Acc:A0A125YZB3] | transcript_product=IMC sub-compartment protein ISP1 | location=TGGT1_chrVIIb:2000787-2002966(-) | protein_length=176 | sequence_SO=chromosome | SO=protein_coding_gene | is_pseudo=false	0	111.004	63	9	47	9	176	19.4	7.69	241.35	9	0.958	1.011	1.048	1	1.062	1.065	0.963	0.989	0.973	13635.8	13056.3	13788.1	14297	13632.6	14485.9	14524.9	13131.6	13489.2	13268.3	13635.8	13056.3	13788.1	14297	13632.6	14485.9	14524.9	13131.6	13489.2	13268.3	High	High	High	High
-4.98272e+18	FALSE	High	IsMasterProtein	TGGT1_237140-t26_1-p1	transcript=TGGT1_237140-t26_1 | gene=TGGT1_237140 | organism=Toxoplasma_gondii_GT1 | gene_product=SOR_SNZ domain-containing protein [Source:UniProtKB/TrEMBL;Acc:S7UQ24] | transcript_product=putative ethylene inducible protein | location=TGGT1_chrX:5625979-5630291(+) | protein_length=307 | sequence_SO=chromosome | SO=protein_coding_gene | is_pseudo=false	0	76.096	44	16	29	16	307	32.7	5.74	109.41	16	0.958	1.002	1.105	1.13	1.12	1.123	1.288	1.303	1.448	5731.7	5488.3	5742.7	6330.7	6475.9	6420.4	6438.8	7381.2	7470.4	8302.3	5731.7	5488.3	5742.7	6330.7	6475.9	6420.4	6438.8	7381.2	7470.4	8302.3	High	High	High	High
7.34317e+18	FALSE	High	IsMasterProtein	TGGT1_258850-t26_1-p1	transcript=TGGT1_258850-t26_1 | gene=TGGT1_258850 | organism=Toxoplasma_gondii_GT1 | gene_product=hypothetical protein | transcript_product=hypothetical protein | location=TGGT1_chrVIIb:3094822-3099514(+) | protein_length=276 | sequence_SO=chromosome | SO=protein_coding_gene | is_pseudo=false	0	7.363	7	2	2	2	276	32.8	9.7	6.69	2	0.958	0.999	0.995	1.042	0.99	0.947	0.904	0.964	0.578	243.2	232.8	242.9	241.9	253.3	240.7	230.2	219.8	234.5	140.4	243.2	232.8	242.9	241.9	253.3	240.7	230.2	219.8	234.5	140.4	High	High	High	High
4.42539e+18	FALSE	High	IsMasterProtein	TGGT1_306390-t26_1-p1	transcript=TGGT1_306390-t26_1 | gene=TGGT1_306390 | organism=Toxoplasma_gondii_GT1 | gene_product=hypothetical protein | transcript_product=hypothetical protein | location=TGGT1_chrIX:5825686-5828653(+) | protein_length=182 | sequence_SO=chromosome | SO=protein_coding_gene | is_pseudo=false	0	32.391	23	3	9	3	182	21.1	8.59	37.81	3	0.958	0.993	1.11	1.073	1.158	1.122	0.809	0.967	1.267	1638.9	1569.3	1627.7	1819.3	1757.8	1898.5	1838.2	1326.5	1585.3	2077.2	1638.9	1569.3	1627.7	1819.3	1757.8	1898.5	1838.2	1326.5	1585.3	2077.2	High	High	High	High
-5.3997e+16	FALSE	High	IsMasterProtein	TGGT1_313270-t26_1-p1	transcript=TGGT1_313270-t26_1 | gene=TGGT1_313270 | organism=Toxoplasma_gondii_GT1 | gene_product=hypothetical protein | transcript_product=hypothetical protein | location=TGGT1_chrXI:3183953-3196338(+) | protein_length=2799 | sequence_SO=chromosome | SO=protein_coding_gene | is_pseudo=false	0	266.074	24	51	74	51	2799	281	9.51	295.6	51	0.958	0.996	1	1.014	1.008	1.019	0.962	0.953	0.961	17288.5	16555	17222.6	17285.8	17528.1	17426.6	17615.5	16625.8	16477	16608.6	17288.5	16555	17222.6	17285.8	17528.1	17426.6	17615.5	16625.8	16477	16608.6	High	High	High	High
8.32643e+18	FALSE	High	IsMasterProtein	TGGT1_278950-t26_1-p1	transcript=TGGT1_278950-t26_1 | gene=TGGT1_278950 | organism=Toxoplasma_gondii_GT1 | gene_product=U6 snRNA-associated Sm-like protein LSm4 [Source:UniProtKB/TrEMBL;Acc:S7UZU9] | transcript_product=LSM domain-containing protein | location=TGGT1_chrXII:5645101-5648089(+) | protein_length=121 | sequence_SO=chromosome | SO=protein_coding_gene | is_pseudo=false	0	26.267	40	5	6	5	121	13.3	9.99	22.95	5	0.958	0.982	0.991	0.959	0.986	0.989	0.895	0.928	0.916	4285	4103.2	4207.5	4244.5	4109.5	4225.9	4238.4	3836	3977.4	3925.9	4285	4103.2	4207.5	4244.5	4109.5	4225.9	4238.4	3836	3977.4	3925.9	High	High	High	High
6.42454e+18	FALSE	High	IsMasterProtein	TGGT1_226000-t26_1-p1	transcript=TGGT1_226000-t26_1 | gene=TGGT1_226000 | organism=Toxoplasma_gondii_GT1 | gene_product=ATP-synt_DE_N domain-containing protein [Source:UniProtKB/TrEMBL;Acc:A0A125YRE2] | transcript_product=putative ATP synthase | location=TGGT1_chrX:1780321-1782432(-) | protein_length=183 | sequence_SO=chromosome | SO=protein_coding_gene | is_pseudo=false	0	75.261	58	8	22	8	183	19.4	5.99	101.78	8	0.958	1.066	1.032	1.003	1.02	1.059	0.959	0.96	0.965	4099.3	3925.6	4368.2	4229.6	4111.6	4180.6	4339.3	3930.6	3935	3955.7	4099.3	3925.6	4368.2	4229.6	4111.6	4180.6	4339.3	3930.6	3935	3955.7	High	High	High	High
8.11794e+18	FALSE	Medium	IsMasterProtein	TGGT1_268300-t26_1-p1	transcript=TGGT1_268300-t26_1 | gene=TGGT1_268300 | organism=Toxoplasma_gondii_GT1 | gene_product=hypothetical protein | transcript_product=hypothetical protein | location=TGGT1_chrVIII:6556944-6558048(-) | protein_length=124 | sequence_SO=chromosome | SO=protein_coding_gene | is_pseudo=false	0.011	2.127	6	1	3	1	124	14.2	9.1	7.95	1	0.958	0.913	1.047	1.026	1.036	1.006	0.645	0.947	1.017	3609.7	3457.1	3296.3	3777.6	3703.8	3739.7	3632.9	2328.7	3417.3	3672.1	3609.7	3457.1	3296.3	3777.6	3703.8	3739.7	3632.9	2328.7	3417.3	3672.1	High	High	High	High
-2.61803e+18	FALSE	High	IsMasterProtein	TGGT1_260500-t26_1-p1	transcript=TGGT1_260500-t26_1 | gene=TGGT1_260500 | organism=Toxoplasma_gondii_GT1 | gene_product=Putative COPI associated protein [Source:UniProtKB/TrEMBL;Acc:A0A125YRK9] | transcript_product=putative COPI associated protein | location=TGGT1_chrVIIb:2175003-2177830(+) | protein_length=270 | sequence_SO=chromosome | SO=protein_coding_gene | is_pseudo=false	0	46.979	30	7	31	7	270	29.9	8.63	102.24	7	0.958	0.97	0.961	0.956	1.012	1.004	0.982	0.985	0.94	11022.7	10559.2	10690.8	10594.1	10537.5	11152.5	11071.4	10826.2	10860.5	10358.9	11022.7	10559.2	10690.8	10594.1	10537.5	11152.5	11071.4	10826.2	10860.5	10358.9	High	High	High	High
1.19931e+18	FALSE	High	IsMasterProtein	TGGT1_309200-t26_1-p1	transcript=TGGT1_309200-t26_1 | gene=TGGT1_309200 | organism=Toxoplasma_gondii_GT1 | gene_product=Zinc finger (CCCH type) motif-containing protein [Source:UniProtKB/TrEMBL;Acc:S7USU6] | transcript_product=zinc finger (CCCH type) motif-containing protein | location=TGGT1_chrXI:516747-519899(+) | protein_length=1050 | sequence_SO=chromosome | SO=protein_coding_gene | is_pseudo=false	0	80.937	15	11	17	11	1050	101.6	8.73	68.34	11	0.958	0.998	1.034	1.037	1.017	1.045	0.943	0.964	0.997	4685.1	4488.2	4674.3	4842.6	4859.7	4766.3	4897.3	4419.4	4516	4670.5	4685.1	4488.2	4674.3	4842.6	4859.7	4766.3	4897.3	4419.4	4516	4670.5	High	High	High	High
3.55533e+18	FALSE	High	IsMasterProtein	TGGT1_265510-t26_1-p1	transcript=TGGT1_265510-t26_1 | gene=TGGT1_265510 | organism=Toxoplasma_gondii_GT1 | gene_product=hypothetical protein | transcript_product=hypothetical protein | location=TGGT1_chrIX:1334263-1336643(+) | protein_length=272 | sequence_SO=chromosome | SO=protein_coding_gene | is_pseudo=false	0	22.004	28	5	6	5	272	29.7	3.97	28.84	5	0.958	0.988	0.985	0.996	0.995	0.983	1.009	1.006	0.933	1700.3	1628.8	1679.5	1674.1	1693.2	1691.3	1670.6	1715	1710.3	1586.1	1700.3	1628.8	1679.5	1674.1	1693.2	1691.3	1670.6	1715	1710.3	1586.1	High	High	High	High
-2.37212e+18	FALSE	High	IsMasterProtein	TGGT1_262720-t26_1-p1	transcript=TGGT1_262720-t26_1 | gene=TGGT1_262720 | organism=Toxoplasma_gondii_GT1 | gene_product=S1-like domain-containing protein [Source:UniProtKB/TrEMBL;Acc:A0A125YPW3] | transcript_product=putative eukaryotic initiation factor-1A | location=TGGT1_chrVIIb:1033429-1037458(-) | protein_length=159 | sequence_SO=chromosome | SO=protein_coding_gene | is_pseudo=false	0	66.653	50	13	48	13	159	17.9	5.02	154.11	13	0.958	1.026	1.03	1.001	1.033	1.052	0.977	0.966	0.839	23253.6	22283.1	23857.8	23945	23287.2	24011.3	24453.5	22725.9	22467	19501.2	23253.6	22283.1	23857.8	23945	23287.2	24011.3	24453.5	22725.9	22467	19501.2	High	High	High	High
4.55911e+17	FALSE	Medium	IsMasterProtein	TGGT1_309100-t26_1-p1	transcript=TGGT1_309100-t26_1 | gene=TGGT1_309100 | organism=Toxoplasma_gondii_GT1 | gene_product=hypothetical protein | transcript_product=hypothetical protein | location=TGGT1_chrXI:462313-466311(-) | protein_length=1332 | sequence_SO=chromosome | SO=protein_coding_gene | is_pseudo=false	0.012	2.005	1	1	1	1	1332	146.3	5.34	2.2	1	0.958	0.967	1.057	1.071	1.002	1.104	1.285	1.226	1.13	307.1	294.3	296.9	324.6	328.8	307.9	339.1	394.7	376.4	347.2	307.1	294.3	296.9	324.6	328.8	307.9	339.1	394.7	376.4	347.2	High	High	High	High
7.73334e+18	FALSE	High	IsMasterProtein	TGGT1_208300-t26_1-p1	transcript=TGGT1_208300-t26_1 | gene=TGGT1_208300 | organism=Toxoplasma_gondii_GT1 | gene_product=hypothetical protein | transcript_product=hypothetical protein | location=TGGT1_chrIb:619209-619974(+) | protein_length=105 | sequence_SO=chromosome | SO=protein_coding_gene | is_pseudo=false	0.004	2.55	9	1	2	1	105	11.9	7.18	4.52	1	0.958	0.961	1.158	0.974	1.069	1.097	0.967	0.94	0.922	322	308.6	309.3	372.8	313.6	344.2	353.3	311.4	302.8	297	322	308.6	309.3	372.8	313.6	344.2	353.3	311.4	302.8	297	High	High	High	High
-1.89886e+18	FALSE	High	IsMasterProtein	TGGT1_212270-t26_1-p1	transcript=TGGT1_212270-t26_1 | gene=TGGT1_212270 | organism=Toxoplasma_gondii_GT1 | gene_product=hypothetical protein | transcript_product=hypothetical protein | location=TGGT1_chrX:3855671-3857610(+) | protein_length=370 | sequence_SO=chromosome | SO=protein_coding_gene | is_pseudo=false	0	50.229	25	11	46	11	370	40.9	6.55	146.65	11	0.958	1.035	1.033	1.018	1.048	1.049	0.75	1.022	1.048	16341.6	15661.8	16919.5	16875	16630.5	17132.3	17146.9	12249	16698	17125.9	16341.6	15661.8	16919.5	16875	16630.5	17132.3	17146.9	12249	16698	17125.9	High	High	High	High
3.14641e+18	FALSE	High	IsMasterProtein	TGGT1_272490-t26_1-p1	transcript=TGGT1_272490-t26_1 | gene=TGGT1_272490 | organism=Toxoplasma_gondii_GT1 | gene_product=Protoporphyrinogen oxidase [Source:UniProtKB/TrEMBL;Acc:A0A125YHL0] | transcript_product=protoporphyrinogen oxidase | location=TGGT1_chrVIII:3936780-3939866(-) | protein_length=1028 | sequence_SO=chromosome | SO=protein_coding_gene | is_pseudo=false	0	29.621	5	3	4	3	1028	109.3	7.69	18.42	3	0.958	0.978	1.011	1.047	1.018	1.057	1.138	0.904	1.074	198.1	189.9	193.8	200.4	207.6	201.6	209.5	225.6	179.2	212.9	198.1	189.9	193.8	200.4	207.6	201.6	209.5	225.6	179.2	212.9	High	High	High	High
-6.87887e+18	FALSE	High	IsMasterProtein	TGGT1_261740-t26_1-p1	transcript=TGGT1_261740-t26_1 | gene=TGGT1_261740 | organism=Toxoplasma_gondii_GT1 | gene_product=hypothetical protein | transcript_product=hypothetical protein | location=TGGT1_chrVIIb:1528797-1529192(-) | protein_length=131 | sequence_SO=chromosome | SO=protein_coding_gene | is_pseudo=false	0	130.101	56	17	158	17	131	14.2	9.06	466.47	17	0.958	1.01	1.038	1.007	1.036	1.068	0.973	1.031	1.09	51291.7	49161.5	51789.4	53254.8	51639.6	53131.8	54773.4	49899.1	52870.2	55901	51291.7	49161.5	51789.4	53254.8	51639.6	53131.8	54773.4	49899.1	52870.2	55901	High	High	High	High
7.21989e+18	FALSE	High	IsMasterProtein	TGGT1_289210-t26_1-p1	transcript=TGGT1_289210-t26_1 | gene=TGGT1_289210 | organism=Toxoplasma_gondii_GT1 | gene_product=Prefoldin subunit protein [Source:UniProtKB/TrEMBL;Acc:S7UQQ5] | transcript_product=prefoldin subunit protein | location=TGGT1_chrIX:2890306-2891984(-) | protein_length=330 | sequence_SO=chromosome | SO=protein_coding_gene | is_pseudo=false	0	39.244	16	6	29	6	330	37.9	7.77	143.47	6	0.958	1.017	1.065	1.054	1.073	1.081	0.856	1.007	1.012	6416.9	6150.5	6525.2	6832.6	6761.6	6888.2	6935.5	5494.4	6463.1	6496.3	6416.9	6150.5	6525.2	6832.6	6761.6	6888.2	6935.5	5494.4	6463.1	6496.3	High	High	High	High
6.46654e+18	FALSE	High	IsMasterProtein	TGGT1_273445-t26_1-p1	transcript=TGGT1_273445-t26_1 | gene=TGGT1_273445 | organism=Toxoplasma_gondii_GT1 | gene_product=SufB/sufD domain-containing protein [Source:UniProtKB/TrEMBL;Acc:S7V472] | transcript_product=sufB/sufD domain-containing protein | location=TGGT1_chrVIII:3498826-3510099(-) | protein_length=1860 | sequence_SO=chromosome | SO=protein_coding_gene | is_pseudo=false	0	7.358	2	2	2	2	1860	202	8.53	5.84	2	0.959	0.975	1.087	1.131	1.063	1.112	1.163	1.061	1.079	336.1	322.2	327.7	365.3	380.2	357.2	373.7	390.8	356.7	362.7	336.1	322.2	327.7	365.3	380.2	357.2	373.7	390.8	356.7	362.7	High	High	High	High
7.90045e+18	FALSE	High	IsMasterProtein	TGGT1_294790-t26_1-p1	transcript=TGGT1_294790-t26_1 | gene=TGGT1_294790 | organism=Toxoplasma_gondii_GT1 | gene_product=hypothetical protein | transcript_product=hypothetical protein | location=TGGT1_chrIa:1130567-1131622(-) | protein_length=351 | sequence_SO=chromosome | SO=protein_coding_gene | is_pseudo=false	0	99.816	26	12	58	12	351	37.7	4.78	230.77	12	0.959	1.068	1.069	1.033	1.063	1.054	0.933	1.045	1.071	23132.5	22175.2	24695.4	24739.6	23888.3	24586.2	24377.7	21593	24181.6	24766	23132.5	22175.2	24695.4	24739.6	23888.3	24586.2	24377.7	21593	24181.6	24766	High	High	High	High
8.50578e+18	FALSE	High	IsMasterProtein	TGGT1_297940-t26_1-p1	transcript=TGGT1_297940-t26_1 | gene=TGGT1_297940 | organism=Toxoplasma_gondii_GT1 | gene_product=Single-strand binding protein [Source:UniProtKB/TrEMBL;Acc:S7UKT9] | transcript_product=single-strand binding protein | location=TGGT1_chrII:2100854-2104951(-) | protein_length=555 | sequence_SO=chromosome | SO=protein_coding_gene | is_pseudo=false	0	32.194	11	6	15	6	555	58.8	9.54	50.49	6	0.959	1.044	1.063	1.055	1.066	1.094	1.087	1.06	1.047	4418.1	4235.4	4614.2	4695.5	4663	4710.9	4835.2	4800.8	4683.3	4624.4	4418.1	4235.4	4614.2	4695.5	4663	4710.9	4835.2	4800.8	4683.3	4624.4	High	High	High	High
-4.29046e+18	FALSE	High	IsMasterProtein	TGGT1_262560-t26_1-p1	transcript=TGGT1_262560-t26_1 | gene=TGGT1_262560 | organism=Toxoplasma_gondii_GT1 | gene_product=hypothetical protein | transcript_product=hypothetical protein | location=TGGT1_chrVIIb:1134862-1136586(+) | protein_length=283 | sequence_SO=chromosome | SO=protein_coding_gene | is_pseudo=false	0	21.958	17	4	5	4	283	29	7.09	18.15	4	0.959	0.97	0.976	0.995	1.013	1.014	0.891	0.938	0.936	1719.9	1648.9	1668.4	1678	1710.6	1742.9	1743.4	1533.3	1613.3	1610.4	1719.9	1648.9	1668.4	1678	1710.6	1742.9	1743.4	1533.3	1613.3	1610.4	High	High	High	High
-1.50296e+18	FALSE	High	IsMasterProtein	TGGT1_206470-t26_1-p1	transcript=TGGT1_206470-t26_1 | gene=TGGT1_206470 | organism=Toxoplasma_gondii_GT1 | gene_product=Dihydrolipoyl dehydrogenase [Source:UniProtKB/TrEMBL;Acc:A0A125YH62] | transcript_product=pyruvate dehydrogenase complex subunit PDH-E3II | location=TGGT1_chrVIIa:922416-929013(+) | protein_length=519 | sequence_SO=chromosome | SO=protein_coding_gene | is_pseudo=false	0	209.629	57	27	117	27	519	55.1	7.03	433.25	27	0.959	1.022	1.005	0.996	1.006	1.02	0.963	0.954	0.964	44556.1	42721.6	45555.9	44777	44371.1	44809.1	45429.4	42927.5	42488.6	42969.1	44556.1	42721.6	45555.9	44777	44371.1	44809.1	45429.4	42927.5	42488.6	42969.1	High	High	High	High
-5.09703e+18	FALSE	High	IsMasterProtein	TGGT1_273860-t26_1-p1	transcript=TGGT1_273860-t26_1 | gene=TGGT1_273860 | organism=Toxoplasma_gondii_GT1 | gene_product=hypothetical protein | transcript_product=hypothetical protein | location=TGGT1_chrVIII:3215892-3216923(+) | protein_length=343 | sequence_SO=chromosome | SO=protein_coding_gene | is_pseudo=false	0	95.446	30	9	26	9	343	37.8	5.81	104.75	9	0.959	1.039	1.044	1.014	1.029	1.053	0.898	1.014	0.991	5584.4	5354.6	5803.9	5829.9	5661.2	5745.6	5877.7	5015.5	5661	5534.8	5584.4	5354.6	5803.9	5829.9	5661.2	5745.6	5877.7	5015.5	5661	5534.8	High	High	High	High
-8.56059e+18	FALSE	High	IsMasterProtein	TGGT1_244280-t26_1-p1	transcript=TGGT1_244280-t26_1 | gene=TGGT1_244280 | organism=Toxoplasma_gondii_GT1 | gene_product=hypothetical protein | transcript_product=hypothetical protein | location=TGGT1_chrVI:3070946-3071335(+) | protein_length=129 | sequence_SO=chromosome | SO=protein_coding_gene | is_pseudo=false	0	129.131	52	8	36	8	129	14.2	4.32	201.16	8	0.959	1.054	1.096	1.116	1.123	1.163	0.953	1.136	1.237	7169.5	6875.3	7557.3	7855.1	7998.3	8051	8338.3	6832	8141.7	8871.5	7169.5	6875.3	7557.3	7855.1	7998.3	8051	8338.3	6832	8141.7	8871.5	High	High	High	High
-8.28344e+18	FALSE	High	IsMasterProtein	TGGT1_310060-t26_1-p1	transcript=TGGT1_310060-t26_1 | gene=TGGT1_310060 | organism=Toxoplasma_gondii_GT1 | gene_product=Exonuclease domain-containing protein [Source:UniProtKB/TrEMBL;Acc:S7W7Y6] | transcript_product=small nuclease | location=TGGT1_chrXI:998254-999357(+) | protein_length=367 | sequence_SO=chromosome | SO=protein_coding_gene | is_pseudo=false	0	24.445	10	4	8	4	367	41.3	7.58	36.35	4	0.959	1.056	1.08	1.016	1.068	1.065	0.987	1.05	0.981	1281.6	1229.1	1353.4	1383.7	1302.1	1368.5	1365.3	1265.4	1345.6	1257.5	1281.6	1229.1	1353.4	1383.7	1302.1	1368.5	1365.3	1265.4	1345.6	1257.5	High	High	High	High
-2.52403e+17	FALSE	High	IsMasterProtein	TGGT1_316140-t26_1-p1	transcript=TGGT1_316140-t26_1 | gene=TGGT1_316140 | organism=Toxoplasma_gondii_GT1 | gene_product=hypothetical protein | transcript_product=hypothetical protein | location=TGGT1_chrXI:5094944-5098981(-) | protein_length=263 | sequence_SO=chromosome | SO=protein_coding_gene | is_pseudo=false	0	47.173	31	7	39	7	263	27.8	8.88	132.22	7	0.959	0.995	1.036	1.029	1.029	1.046	0.983	0.98	0.981	16178.7	15517.3	16091.7	16765.6	16653	16642	16918.7	15901.8	15850.2	15873.6	16178.7	15517.3	16091.7	16765.6	16653	16642	16918.7	15901.8	15850.2	15873.6	High	High	High	High
-2.50886e+18	FALSE	High	IsMasterProtein	TGGT1_280550-t26_1-p1	transcript=TGGT1_280550-t26_1 | gene=TGGT1_280550 | organism=Toxoplasma_gondii_GT1 | gene_product=Coatomer subunit zeta [Source:UniProtKB/TrEMBL;Acc:S7W2M6] | transcript_product=clathrin adaptor complex small chain subfamily protein | location=TGGT1_chrVIIa:287174-289721(+) | protein_length=207 | sequence_SO=chromosome | SO=protein_coding_gene | is_pseudo=false	0	12.929	14	2	4	2	207	21.6	4.56	15.57	2	0.959	0.85	0.899	0.963	0.935	0.958	0.792	0.898	0.898	1652.4	1584.9	1403.9	1485.1	1590.8	1544.6	1582.3	1309.3	1484.2	1484.1	1652.4	1584.9	1403.9	1485.1	1590.8	1544.6	1582.3	1309.3	1484.2	1484.1	High	High	High	High
2.13631e+18	FALSE	High	IsMasterProtein	TGGT1_297070-t26_1-p1	transcript=TGGT1_297070-t26_1 | gene=TGGT1_297070 | organism=Toxoplasma_gondii_GT1 | gene_product=Alpha-carbonic anhydrase domain-containing protein [Source:UniProtKB/TrEMBL;Acc:A0A125YMC5] | transcript_product=hypothetical protein | location=TGGT1_chrII:1492810-1494671(-) | protein_length=519 | sequence_SO=chromosome | SO=protein_coding_gene | is_pseudo=false	0	97.079	27	12	51	12	519	58.1	6.33	178.88	12	0.959	1.021	1.039	0.998	1.022	1.046	0.933	0.996	0.963	14986.5	14377.3	15307.1	15573.5	14959	15312.5	15672.5	13980.4	14925	14427.3	14986.5	14377.3	15307.1	15573.5	14959	15312.5	15672.5	13980.4	14925	14427.3	High	High	High	High
-6.63848e+16	FALSE	High	IsMasterProtein	TGGT1_208450-t26_1-p1	transcript=TGGT1_208450-t26_1 | gene=TGGT1_208450 | organism=Toxoplasma_gondii_GT1 | gene_product=Protease inhibitor PI2 [Source:UniProtKB/TrEMBL;Acc:A0A125YJP6] | transcript_product=protease inhibitor PI2 | location=TGGT1_chrIb:728877-731848(-) | protein_length=318 | sequence_SO=chromosome | SO=protein_coding_gene | is_pseudo=false	0	128.629	48	12	52	12	318	35.3	5.16	238.98	12	0.959	1.043	1.049	1.019	1.061	1.084	0.891	0.988	1.009	9699.2	9304.9	10116.5	10176.5	9887.8	10287.9	10514.7	8641.7	9580.1	9782.5	9699.2	9304.9	10116.5	10176.5	9887.8	10287.9	10514.7	8641.7	9580.1	9782.5	High	High	High	High
-5.20507e+17	FALSE	High	IsMasterProtein	TGGT1_247530-t26_1-p1	transcript=TGGT1_247530-t26_1 | gene=TGGT1_247530 | organism=Toxoplasma_gondii_GT1 | gene_product=hypothetical protein | transcript_product=hypothetical protein | location=TGGT1_chrXII:3326216-3326857(-) | protein_length=213 | sequence_SO=chromosome | SO=protein_coding_gene | is_pseudo=false	0	10.801	10	2	4	2	213	22.8	10.35	15.84	2	0.959	1.082	1.051	1.001	1.041	1.131	0.822	1.032	1.162	1335.3	1281	1444.3	1402.9	1337.1	1390.6	1510.3	1098.2	1377.8	1552.1	1335.3	1281	1444.3	1402.9	1337.1	1390.6	1510.3	1098.2	1377.8	1552.1	High	High	High	High
-7.79634e+18	FALSE	High	IsMasterProtein	TGGT1_289180-t26_1-p1	transcript=TGGT1_289180-t26_1 | gene=TGGT1_289180 | organism=Toxoplasma_gondii_GT1 | gene_product=Thioredoxin domain-containing protein [Source:UniProtKB/TrEMBL;Acc:A0A125YMW4] | transcript_product=putative thioredoxin family redox-active protein | location=TGGT1_chrIX:2853589-2856673(-) | protein_length=208 | sequence_SO=chromosome | SO=protein_coding_gene | is_pseudo=false	0.003	2.967	4	1	1	1	208	22.7	8.28	2.46	1	0.959	0.929	0.946	1.001	1.058	1.019	0.879	0.984	0.9	282.4	270.9	262.4	267.2	282.6	298.8	287.8	248.3	277.8	254	282.4	270.9	262.4	267.2	282.6	298.8	287.8	248.3	277.8	254	High	High	High	High
6.58121e+17	FALSE	High	IsMasterProtein	TGGT1_205650-t26_1-p1	transcript=TGGT1_205650-t26_1 | gene=TGGT1_205650 | organism=Toxoplasma_gondii_GT1 | gene_product=AP2 domain transcription factor AP2VIIa-3 [Source:UniProtKB/TrEMBL;Acc:S7W340] | transcript_product=AP2 domain transcription factor AP2VIIa-3 | location=TGGT1_chrVIIa:1146601-1151044(-) | protein_length=998 | sequence_SO=chromosome | SO=protein_coding_gene | is_pseudo=false	0	6.711	2	2	3	2	998	105.8	6.71	8.65	2	0.959	0.908	0.908	0.988	0.872	0.987	0.924	0.986	0.956	323.6	310.5	294	293.8	319.8	282.3	319.4	299.2	319	309.4	323.6	310.5	294	293.8	319.8	282.3	319.4	299.2	319	309.4	High	High	High	High
-8.1557e+18	FALSE	High	IsMasterProtein	TGGT1_270360-t26_1-p1	transcript=TGGT1_270360-t26_1 | gene=TGGT1_270360 | organism=Toxoplasma_gondii_GT1 | gene_product=hypothetical protein | transcript_product=hypothetical protein | location=TGGT1_chrVIII:5246790-5248031(+) | protein_length=252 | sequence_SO=chromosome | SO=protein_coding_gene | is_pseudo=false	0	34.611	28	8	20	8	252	28.2	9.09	56.23	8	0.96	0.903	1.008	1.025	1.036	1.072	0.606	0.986	1.161	9813.8	9416.4	8861.9	9892.7	10062.2	10163.4	10518	5948.5	9673.1	11397.6	9813.8	9416.4	8861.9	9892.7	10062.2	10163.4	10518	5948.5	9673.1	11397.6	High	High	High	High
6.41827e+18	FALSE	High	IsMasterProtein	TGGT1_248110-t26_1-p1	transcript=TGGT1_248110-t26_1 | gene=TGGT1_248110 | organism=Toxoplasma_gondii_GT1 | gene_product=hypothetical protein | transcript_product=hypothetical protein | location=TGGT1_chrXII:3594425-3597355(-) | protein_length=493 | sequence_SO=chromosome | SO=protein_coding_gene | is_pseudo=false	0.003	2.951	2	1	1	1	493	53.7	5.08	4.64	1	0.96	0.977	0.949	0.987	0.966	0.946	1.097	0.979	1.023	415.8	399	406.3	394.6	410.5	401.6	393.3	456.2	407	425.6	415.8	399	406.3	394.6	410.5	401.6	393.3	456.2	407	425.6	High	High	High	High
-8.53955e+17	FALSE	High	IsMasterProtein	TGGT1_252220-t26_1-p1	transcript=TGGT1_252220-t26_1 | gene=TGGT1_252220 | organism=Toxoplasma_gondii_GT1 | gene_product=TPR_REGION domain-containing protein [Source:UniProtKB/TrEMBL;Acc:S7VVZ4] | transcript_product=tetratricopeptide repeat domain containing protein | location=TGGT1_chrIII:391134-397188(+) | protein_length=565 | sequence_SO=chromosome | SO=protein_coding_gene | is_pseudo=false	0	208.567	51	29	80	29	565	63.4	6.51	288.36	29	0.96	1.037	1.038	1.008	1.038	1.035	0.951	1.001	0.985	29783.9	28582.6	30899.3	30909.3	30034.8	30919	30826.9	28334.2	29812.8	29323.6	29783.9	28582.6	30899.3	30909.3	30034.8	30919	30826.9	28334.2	29812.8	29323.6	High	High	High	High
5.13342e+18	FALSE	High	IsMasterProtein	TGGT1_200430-t26_1-p1	transcript=TGGT1_200430-t26_1 | gene=TGGT1_200430 | organism=Toxoplasma_gondii_GT1 | gene_product=CMP/dCMP-type deaminase domain-containing protein [Source:UniProtKB/TrEMBL;Acc:S7V5S2] | transcript_product=cytidine and deoxycytidylate deaminase zinc-binding region domain-containing protein | location=TGGT1_chrVIII:6849719-6856851(-) | protein_length=514 | sequence_SO=chromosome | SO=protein_codin…	0	9.113	3	1	2	1	514	54.9	8.09	7.61	1	0.96	0.897	1.043	1.087	1.012	1.024	1.072	1.01	1.071	343.8	329.9	308.2	358.7	373.6	348	352.1	368.6	347.4	368.1	343.8	329.9	308.2	358.7	373.6	348	352.1	368.6	347.4	368.1	High	High	High	High
-4.58441e+17	FALSE	High	IsMasterProtein	TGGT1_205558-t26_1-p1	transcript=TGGT1_205558-t26_1 | gene=TGGT1_205558 | organism=Toxoplasma_gondii_GT1 | gene_product=NAC-A/B domain-containing protein [Source:UniProtKB/TrEMBL;Acc:S7W330] | transcript_product=NAC domain-containing protein | location=TGGT1_chrVIIa:1246583-1248351(+) | protein_length=189 | sequence_SO=chromosome | SO=protein_coding_gene | is_pseudo=false	0	131.044	68	9	105	9	189	20.5	5.49	366.16	9	0.96	1.017	1.062	1.07	1.077	1.084	1.046	1.131	1.209	20764.6	19929.1	21123	22054.8	22227	22364.9	22507.5	21721	23489.7	25113.7	20764.6	19929.1	21123	22054.8	22227	22364.9	22507.5	21721	23489.7	25113.7	High	High	High	High
6.13037e+18	FALSE	High	IsMasterProtein	TGGT1_239260-t26_1-p1	transcript=TGGT1_239260-t26_1 | gene=TGGT1_239260 | organism=Toxoplasma_gondii_GT1 | gene_product=Histone H4 [Source:UniProtKB/TrEMBL;Acc:A0A125YHU3] | transcript_product=histone H4 | location=TGGT1_chrVI:491746-492057(-) | protein_length=103 | sequence_SO=chromosome | SO=protein_coding_gene | is_pseudo=false	0	55.497	51	6	261	6	103	11.4	11.36	851.31	6	0.96	0.977	0.984	0.949	0.943	0.947	0.908	0.819	0.732	44823.9	43023.6	43772.8	44104.2	42522.7	42252	42465.7	40679.6	36698.2	32818.1	44823.9	43023.6	43772.8	44104.2	42522.7	42252	42465.7	40679.6	36698.2	32818.1	High	High	High	High
5.13966e+18	FALSE	High	IsMasterProtein	TGGT1_203780-t26_1-p1	transcript=TGGT1_203780-t26_1 | gene=TGGT1_203780 | organism=Toxoplasma_gondii_GT1 | gene_product=hypothetical protein | transcript_product=hypothetical protein | location=TGGT1_chrVIIa:2142786-2147213(+) | protein_length=1475 | sequence_SO=chromosome | SO=protein_coding_gene | is_pseudo=false	0	98.78	16	17	27	17	1475	145.1	7.24	90.64	17	0.96	0.975	1.004	1.04	1.041	1.083	1.059	0.969	1.034	10331.2	9916.5	10072.2	10370.1	10742.8	10759.1	11189.2	10940.2	10008.8	10684.7	10331.2	9916.5	10072.2	10370.1	10742.8	10759.1	11189.2	10940.2	10008.8	10684.7	High	High	High	High
6.19485e+18	FALSE	High	IsMasterProtein	TGGT1_212210-t26_1-p1	transcript=TGGT1_212210-t26_1 | gene=TGGT1_212210 | organism=Toxoplasma_gondii_GT1 | gene_product=hypothetical protein | transcript_product=hypothetical protein | location=TGGT1_chrX:3883183-3884263(-) | protein_length=280 | sequence_SO=chromosome | SO=protein_coding_gene | is_pseudo=false	0	87.921	43	7	31	7	280	28.9	4.13	187.16	7	0.96	1.067	1.079	1.063	1.088	1.1	0.91	1.094	1.115	7267.4	6975.7	7755.1	7840	7726.1	7903.5	7993.4	6609.9	7953.3	8105.5	7267.4	6975.7	7755.1	7840	7726.1	7903.5	7993.4	6609.9	7953.3	8105.5	High	High	High	High
-8.64897e+18	FALSE	High	IsMasterProtein	TGGT1_278270-t26_1-p1	transcript=TGGT1_278270-t26_1 | gene=TGGT1_278270 | organism=Toxoplasma_gondii_GT1 | gene_product=Putative nucleolar protein, structural component of H/ACA snoRNP [Source:UniProtKB/TrEMBL;Acc:A0A125YM51] | transcript_product=putative nucleolar protein, structural component of H/ACA snoRNP | location=TGGT1_chrXII:6093021-6093957(+) | protein_length=64 | sequence_SO=chromosome | SO=protein_coding_g…	0	14.75	48	4	9	4	64	7.5	9.63	29.38	4	0.96	0.964	0.955	0.941	0.95	0.947	0.67	0.843	0.73	4274.7	4103.9	4119.9	4082	4024	4060.7	4046.5	2862.8	3602.1	3118.4	4274.7	4103.9	4119.9	4082	4024	4060.7	4046.5	2862.8	3602.1	3118.4	High	High	High	High
-3.4643e+18	FALSE	High	IsMasterProtein	TGGT1_225320-t26_1-p1	transcript=TGGT1_225320-t26_1 | gene=TGGT1_225320 | organism=Toxoplasma_gondii_GT1 | gene_product=hypothetical protein | transcript_product=hypothetical protein | location=TGGT1_chrX:2223221-2225369(+) | protein_length=504 | sequence_SO=chromosome | SO=protein_coding_gene | is_pseudo=false	0	20.716	10	3	8	3	504	54.4	5.97	29.48	3	0.96	0.993	1.009	0.995	1.027	1.036	0.988	0.979	0.994	3982.3	3823.8	3955.7	4020.1	3962.3	4090.2	4127.4	3934.5	3898.5	3958.4	3982.3	3823.8	3955.7	4020.1	3962.3	4090.2	4127.4	3934.5	3898.5	3958.4	High	High	High	High
4.81159e+18	FALSE	High	IsMasterProtein	TGGT1_292260-t26_1-p1	transcript=TGGT1_292260-t26_1 | gene=TGGT1_292260 | organism=Toxoplasma_gondii_GT1 | gene_product=SAG-related sequence SRS36B [Source:UniProtKB/TrEMBL;Acc:A0A125YQ15] | transcript_product=SAG-related sequence SRS36B | location=TGGT1_chrIX:4456134-4457222(+) | protein_length=362 | sequence_SO=chromosome | SO=protein_coding_gene | is_pseudo=false	0	7.852	6	2	2	2	362	38.8	5.45	5.81	2	0.96	1.024	1.008	0.997	1.065	1.042	1.005	0.96	0.961	541.7	520.1	554.8	545.8	540.2	576.7	564.6	544.2	519.9	520.5	541.7	520.1	554.8	545.8	540.2	576.7	564.6	544.2	519.9	520.5	High	High	High	High
6.0758e+18	FALSE	High	IsMasterProtein	TGGT1_267300-t26_1-p1	transcript=TGGT1_267300-t26_1 | gene=TGGT1_267300 | organism=Toxoplasma_gondii_GT1 | gene_product=hypothetical protein | transcript_product=hypothetical protein | location=TGGT1_chrIX:568020-572078(-) | protein_length=265 | sequence_SO=chromosome | SO=protein_coding_gene | is_pseudo=false	0	21.579	18	5	13	5	265	28.9	5.92	35.87	5	0.96	0.98	0.989	1.022	1.003	1.029	0.966	0.959	0.97	1865.2	1791.4	1827.6	1844.7	1906.2	1870.7	1918.7	1801.4	1788.3	1808.4	1865.2	1791.4	1827.6	1844.7	1906.2	1870.7	1918.7	1801.4	1788.3	1808.4	High	High	High	High
1.7702e+18	FALSE	High	IsMasterProtein	TGGT1_247780-t26_1-p1	transcript=TGGT1_247780-t26_1 | gene=TGGT1_247780 | organism=Toxoplasma_gondii_GT1 | gene_product=hypothetical protein | transcript_product=hypothetical protein | location=TGGT1_chrXII:3515889-3518645(-) | protein_length=267 | sequence_SO=chromosome | SO=protein_coding_gene | is_pseudo=false	0.003	3.493	3	1	1	1	267	29	7.12	3.32	1	0.96	0.939	0.954	0.92	0.937	0.961	0.871	0.933	0.902	999.8	960.2	938.8	954.1	920	937.3	961.3	870.9	933	902.1	999.8	960.2	938.8	954.1	920	937.3	961.3	870.9	933	902.1	High	High	High	High
-1.25913e+18	FALSE	High	IsMasterProtein	TGGT1_261710-t26_1-p1	transcript=TGGT1_261710-t26_1 | gene=TGGT1_261710 | organism=Toxoplasma_gondii_GT1 | gene_product=ANK_REP_REGION domain-containing protein [Source:UniProtKB/TrEMBL;Acc:A0A125YR37] | transcript_product=ankyrin repeat-containing protein | location=TGGT1_chrVIIb:1547897-1550011(+) | protein_length=224 | sequence_SO=chromosome | SO=protein_coding_gene | is_pseudo=false	0	66.427	50	10	44	10	224	23.4	5.29	148.09	10	0.96	1.05	1.031	1.006	1.027	1.036	0.95	0.99	0.993	15644	15025.3	16433.4	16131.2	15743.6	16072.5	16208	14858.6	15494.1	15528.7	15644	15025.3	16433.4	16131.2	15743.6	16072.5	16208	14858.6	15494.1	15528.7	High	High	High	High
-4.20107e+17	FALSE	High	IsMasterProtein	TGGT1_313290-t26_1-p1	transcript=TGGT1_313290-t26_1 | gene=TGGT1_313290 | organism=Toxoplasma_gondii_GT1 | gene_product=MORN repeat-containing protein [Source:UniProtKB/TrEMBL;Acc:S7W874] | transcript_product=MORN repeat-containing protein | location=TGGT1_chrXI:3208385-3212332(-) | protein_length=429 | sequence_SO=chromosome | SO=protein_coding_gene | is_pseudo=false	0	125.049	48	16	32	16	429	46	6.93	120.33	16	0.96	1.013	1.065	1.033	1.065	1.073	1.042	1.059	1.017	9366.3	8996	9483.5	9978.2	9679.9	9977	10047.9	9756.4	9923.3	9523.6	9366.3	8996	9483.5	9978.2	9679.9	9977	10047.9	9756.4	9923.3	9523.6	High	High	High	High
5.80346e+18	FALSE	High	IsMasterProtein	TGGT1_262935-t26_1-p1	transcript=TGGT1_262935-t26_1 | gene=TGGT1_262935 | organism=Toxoplasma_gondii_GT1 | gene_product=hypothetical protein | transcript_product=hypothetical protein | location=TGGT1_chrVIIb:884077-886490(-) | protein_length=681 | sequence_SO=chromosome | SO=protein_coding_gene | is_pseudo=false	0	17.704	8	5	5	5	681	76.6	11.11	17.03	5	0.96	0.964	1.026	1.057	1.043	1.069	1.034	0.984	0.92	2220.6	2132.8	2139.8	2277.8	2348.2	2316.2	2374.8	2295.6	2185.9	2042.1	2220.6	2132.8	2139.8	2277.8	2348.2	2316.2	2374.8	2295.6	2185.9	2042.1	High	High	High	High
6.11827e+18	FALSE	High	IsMasterProtein	TGGT1_291890-t26_1-p1	transcript=TGGT1_291890-t26_1 | gene=TGGT1_291890 | organism=Toxoplasma_gondii_GT1 | gene_product=TgMIC1 domain-containing protein [Source:UniProtKB/TrEMBL;Acc:S7VXI3] | transcript_product=microneme protein MIC1 | location=TGGT1_chrIX:4200849-4203191(-) | protein_length=456 | sequence_SO=chromosome | SO=protein_coding_gene | is_pseudo=false	0	360.31	86	30	310	30	456	48.6	5.34	1277.49	30	0.961	0.972	1.001	0.979	0.996	0.995	0.968	0.936	0.925	85604.2	82223.9	83177.1	85677.7	83805.8	85245.6	85155.2	82856.1	80099.3	79202.7	85604.2	82223.9	83177.1	85677.7	83805.8	85245.6	85155.2	82856.1	80099.3	79202.7	High	High	High	High
-6.37111e+18	FALSE	High	IsMasterProtein	TGGT1_249590-t26_1-p1	transcript=TGGT1_249590-t26_1 | gene=TGGT1_249590 | organism=Toxoplasma_gondii_GT1 | gene_product=Proteasome subunit alpha type [Source:UniProtKB/TrEMBL;Acc:A0A125YVM8] | transcript_product=putative proteasome subunit alpha type 5-2 | location=TGGT1_chrXII:4602436-4606174(+) | protein_length=258 | sequence_SO=chromosome | SO=protein_coding_gene | is_pseudo=false	0	87.343	52	12	48	12	258	28.3	5.08	166.74	12	0.961	0.988	0.95	0.984	0.947	0.949	1.009	0.932	0.991	15352.8	14747.2	15164.6	14580.9	15111.6	14545	14574.7	15497.9	14308.5	15214.2	15352.8	14747.2	15164.6	14580.9	15111.6	14545	14574.7	15497.9	14308.5	15214.2	High	High	High	High
7.80081e+18	FALSE	High	IsMasterProtein	TGGT1_310850-t26_1-p1	transcript=TGGT1_310850-t26_1 | gene=TGGT1_310850 | organism=Toxoplasma_gondii_GT1 | gene_product=MYND-type domain-containing protein [Source:UniProtKB/TrEMBL;Acc:S7W257] | transcript_product=MYND finger domain-containing protein | location=TGGT1_chrXI:1589279-1592505(+) | protein_length=253 | sequence_SO=chromosome | SO=protein_coding_gene | is_pseudo=false	0	20.395	22	5	9	5	253	28.3	7.62	30.15	5	0.961	0.994	1.002	1.004	1.022	0.99	0.956	0.967	0.957	3049.5	2929.7	3030.5	3055.2	3061.8	3117.4	3018.7	2916.1	2948.1	2917.7	3049.5	2929.7	3030.5	3055.2	3061.8	3117.4	3018.7	2916.1	2948.1	2917.7	High	High	High	High
-6.96579e+18	FALSE	High	IsMasterProtein	TGGT1_223668-t26_1-p1	transcript=TGGT1_223668-t26_1 | gene=TGGT1_223668 | organism=Toxoplasma_gondii_GT1 | gene_product=zf-LYAR domain-containing protein [Source:UniProtKB/TrEMBL;Acc:S7UWQ1] | transcript_product=LYAR-type C2HC zinc finger protein | location=TGGT1_chrX:3569887-3571751(+) | protein_length=219 | sequence_SO=chromosome | SO=protein_coding_gene | is_pseudo=false	0	24.977	26	5	8	5	219	24.6	9.25	27.96	5	0.961	0.979	1.023	0.994	0.996	1.011	0.983	0.934	0.858	3633	3490.4	3557.6	3716.8	3611.9	3620.2	3673.6	3571.5	3392.4	3116.9	3633	3490.4	3557.6	3716.8	3611.9	3620.2	3673.6	3571.5	3392.4	3116.9	High	High	High	High
6.20637e+18	FALSE	High	IsMasterProtein	TGGT1_247960-t26_1-p1	transcript=TGGT1_247960-t26_1 | gene=TGGT1_247960 | organism=Toxoplasma_gondii_GT1 | gene_product=hypothetical protein | transcript_product=hypothetical protein | location=TGGT1_chrXII:3571959-3574697(-) | protein_length=351 | sequence_SO=chromosome | SO=protein_coding_gene | is_pseudo=false	0	8.316	5	2	2	2	351	37.5	8.02	6.68	2	0.961	1.124	1.03	1.022	1.024	1.007	0.946	1.022	0.965	988.3	949.6	1110.5	1018.3	1009.7	1011.7	995.6	934.8	1009.7	953.6	988.3	949.6	1110.5	1018.3	1009.7	1011.7	995.6	934.8	1009.7	953.6	High	High	High	High
3.46761e+18	FALSE	High	IsMasterProtein	TGGT1_250340-t26_1-p1	transcript=TGGT1_250340-t26_1 | gene=TGGT1_250340 | organism=Toxoplasma_gondii_GT1 | gene_product=Centrin 2 [Source:UniProtKB/TrEMBL;Acc:S7V0C6] | transcript_product=centrin 2 | location=TGGT1_chrXII:4993747-4995535(-) | protein_length=170 | sequence_SO=chromosome | SO=protein_coding_gene | is_pseudo=false	0	90.629	76	11	36	11	170	19.1	4.67	163.3	11	0.961	1.076	1.067	1.046	1.066	1.072	0.862	1.028	1.078	8099	7781.6	8710.6	8639	8471.8	8635.2	8683.7	6984.1	8328.1	8728.6	8099	7781.6	8710.6	8639	8471.8	8635.2	8683.7	6984.1	8328.1	8728.6	High	High	High	High
5.11409e+18	FALSE	High	IsMasterProtein	TGGT1_286560-t26_1-p1	transcript=TGGT1_286560-t26_1 | gene=TGGT1_286560 | organism=Toxoplasma_gondii_GT1 | gene_product=Sm domain-containing protein [Source:UniProtKB/TrEMBL;Acc:A0A125YNH5] | transcript_product=U6 snRNA-associated Sm family protein | location=TGGT1_chrV:1638606-1640043(+) | protein_length=99 | sequence_SO=chromosome | SO=protein_coding_gene | is_pseudo=false	0	27.825	72	5	13	4	99	10.9	5.03	47.35	5	0.961	1.019	1.014	0.976	0.997	0.989	0.898	1.005	0.961	1857.6	1784.9	1893.1	1884.5	1813.3	1852.2	1837.5	1668.8	1867.3	1785.3	1857.6	1784.9	1893.1	1884.5	1813.3	1852.2	1837.5	1668.8	1867.3	1785.3	High	High	High	High
-6.15383e+18	FALSE	High	IsMasterProtein	TGGT1_229480-t26_1-p1	transcript=TGGT1_229480-t26_1 | gene=TGGT1_229480 | organism=Toxoplasma_gondii_GT1 | gene_product=Putative calcium binding protein [Source:UniProtKB/TrEMBL;Acc:S7V2K1] | transcript_product=putative calcium binding protein precursor | location=TGGT1_chrVIII:289042-291582(-) | protein_length=335 | sequence_SO=chromosome | SO=protein_coding_gene | is_pseudo=false	0	302.093	68	21	303	21	335	38.3	4.69	1282.61	21	0.961	1.059	1.07	1.032	1.07	1.081	0.963	1.05	1.092	59519.6	57190.7	63016.9	63687.3	61396.5	63687	64333.1	57319.7	62468.2	64983.7	59519.6	57190.7	63016.9	63687.3	61396.5	63687	64333.1	57319.7	62468.2	64983.7	High	High	High	High
-6.99254e+16	FALSE	High	IsMasterProtein	TGGT1_291620-t26_1-p1	transcript=TGGT1_291620-t26_1 | gene=TGGT1_291620 | organism=Toxoplasma_gondii_GT1 | gene_product=hypothetical protein | transcript_product=hypothetical protein | location=TGGT1_chrIX:4099622-4107729(+) | protein_length=1497 | sequence_SO=chromosome | SO=protein_coding_gene | is_pseudo=false	0	58.493	8	9	11	9	1497	160.5	5.17	39.07	9	0.961	0.988	1.044	1.053	1.019	1.017	0.996	0.958	0.93	1388.4	1334.2	1371.7	1449.4	1461.4	1415.4	1411.7	1382.3	1330.1	1290.8	1388.4	1334.2	1371.7	1449.4	1461.4	1415.4	1411.7	1382.3	1330.1	1290.8	High	High	High	High
5.67296e+18	FALSE	High	IsMasterProtein	TGGT1_215350-t26_1-p1	transcript=TGGT1_215350-t26_1 | gene=TGGT1_215350 | organism=Toxoplasma_gondii_GT1 | gene_product=hypothetical protein | transcript_product=hypothetical protein | location=TGGT1_chrX:6812523-6813631(-) | protein_length=145 | sequence_SO=chromosome | SO=protein_coding_gene | is_pseudo=false	0	23.962	34	6	26	6	145	16.1	9.07	73.78	6	0.961	1.119	1.085	1.061	1.14	1.142	0.974	1.108	1.222	10877.6	10452.6	12171.7	11799.1	11544.7	12401.9	12426.6	10590	12051.1	13291	10877.6	10452.6	12171.7	11799.1	11544.7	12401.9	12426.6	10590	12051.1	13291	High	High	High	High
-5.3382e+18	FALSE	High	IsMasterProtein	TGGT1_244700-t26_1-p1	transcript=TGGT1_244700-t26_1 | gene=TGGT1_244700 | organism=Toxoplasma_gondii_GT1 | gene_product=NAD(+)/NADH kinase domain-containing protein [Source:UniProtKB/TrEMBL;Acc:S7W7F5] | transcript_product=NAD(+)/NADH kinase domain-containing protein | location=TGGT1_chrVI:3371487-3383046(+) | protein_length=2109 | sequence_SO=chromosome | SO=protein_coding_gene | is_pseudo=false	0	10.687	1	2	5	2	2109	228.8	7.06	18.27	2	0.961	1.01	0.987	1.056	0.964	1.016	1.01	0.977	1.049	482.9	464.1	487.8	476.5	509.9	465.8	490.9	487.7	471.9	506.5	482.9	464.1	487.8	476.5	509.9	465.8	490.9	487.7	471.9	506.5	High	High	High	High
-3.52337e+18	FALSE	High	IsMasterProtein	TGGT1_216580-t26_1-p1	transcript=TGGT1_216580-t26_1 | gene=TGGT1_216580 | organism=Toxoplasma_gondii_GT1 | gene_product=hypothetical protein | transcript_product=hypothetical protein | location=TGGT1_chrXI:5993384-5998282(-) | protein_length=1327 | sequence_SO=chromosome | SO=protein_coding_gene | is_pseudo=false	0	51.411	10	10	10	10	1327	130.4	9.89	41.07	10	0.961	1.018	1.002	0.991	0.983	1.014	0.901	0.973	1.014	2459	2363.4	2502.4	2464.5	2435.7	2416.3	2494.4	2214.5	2392.8	2494.1	2459	2363.4	2502.4	2464.5	2435.7	2416.3	2494.4	2214.5	2392.8	2494.1	High	High	High	High
2.27053e+18	FALSE	High	IsMasterProtein	TGGT1_228080-t26_1-p1	transcript=TGGT1_228080-t26_1 | gene=TGGT1_228080 | organism=Toxoplasma_gondii_GT1 | gene_product=tRNA-dihydrouridine(47) synthase [NAD(P)(+)] [Source:UniProtKB/TrEMBL;Acc:S7W5V4] | transcript_product=dihydrouridine synthase (dus) protein | location=TGGT1_chrX:504526-514341(+) | protein_length=1220 | sequence_SO=chromosome | SO=protein_coding_gene | is_pseudo=false	0.001	5.707	1	1	1	1	1220	131.3	6.95	4.71	1	0.961	0.979	1.042	1.004	1.014	0.899	1.101	1.077	1.109	111.1	106.8	108.8	115.8	111.6	112.6	99.9	122.3	119.6	123.3	111.1	106.8	108.8	115.8	111.6	112.6	99.9	122.3	119.6	123.3	High	High	High	High
-1.68321e+18	FALSE	Medium	IsMasterProtein	TGGT1_299990-t26_1-p1	transcript=TGGT1_299990-t26_1 | gene=TGGT1_299990 | organism=Toxoplasma_gondii_GT1 | gene_product=Archease domain-containing protein [Source:UniProtKB/TrEMBL;Acc:S7UFJ5] | transcript_product=archease family protein | location=TGGT1_chrXII:257118-257999(-) | protein_length=293 | sequence_SO=chromosome | SO=protein_coding_gene | is_pseudo=false	0.019	1.7	3	1	1	1	293	32.3	5.66	0	1	0.961	1.189	0.93	0.994	0.888	1.013	0.978	1.024	0.7	476.2	457.7	566.2	442.8	473.1	422.8	482.1	465.6	487.5	333.2	476.2	457.7	566.2	442.8	473.1	422.8	482.1	465.6	487.5	333.2	High	High	High	High
6.20394e+17	FALSE	High	IsMasterProtein	TGGT1_228010-t26_1-p1	transcript=TGGT1_228010-t26_1 | gene=TGGT1_228010 | organism=Toxoplasma_gondii_GT1 | gene_product=MitMem_reg domain-containing protein [Source:UniProtKB/TrEMBL;Acc:S7UWZ9] | transcript_product=hypothetical protein | location=TGGT1_chrX:579787-586069(+) | protein_length=566 | sequence_SO=chromosome | SO=protein_coding_gene | is_pseudo=false	0.003	3.141	2	1	1	1	566	60.3	7.25	2.88	1	0.961	1.033	0.97	0.966	0.974	0.868	0.954	0.93	1.04	148.7	142.9	153.5	144.2	143.6	144.7	129	141.9	138.2	154.6	148.7	142.9	153.5	144.2	143.6	144.7	129	141.9	138.2	154.6	High	High	High	High
-2.61477e+17	FALSE	High	IsMasterProtein	TGGT1_215380-t26_1-p1	transcript=TGGT1_215380-t26_1 | gene=TGGT1_215380 | organism=Toxoplasma_gondii_GT1 | gene_product=hypothetical protein | transcript_product=hypothetical protein | location=TGGT1_chrX:6826641-6829034(-) | protein_length=797 | sequence_SO=chromosome | SO=protein_coding_gene | is_pseudo=false	0	31.217	8	4	8	4	797	85.3	4.86	44.6	4	0.961	0.975	1.046	1.074	1.1	1.106	1.081	0.978	1.011	1609.5	1547	1568.9	1684.1	1728.1	1770.4	1780.5	1739.3	1573.6	1627	1609.5	1547	1568.9	1684.1	1728.1	1770.4	1780.5	1739.3	1573.6	1627	High	High	High	High
-4.64958e+18	FALSE	High	IsMasterProtein	TGGT1_229680-t26_1-p1	transcript=TGGT1_229680-t26_1 | gene=TGGT1_229680 | organism=Toxoplasma_gondii_GT1 | gene_product=hypothetical protein | transcript_product=hypothetical protein | location=TGGT1_chrVIII:373292-373774(-) | protein_length=160 | sequence_SO=chromosome | SO=protein_coding_gene | is_pseudo=false	0.001	4.737	5	1	2	1	160	17.8	5.12	5.55	1	0.961	0.868	0.982	0.956	0.957	0.935	0.858	0.929	0.941	866	832.5	751.5	850.5	827.9	828.3	809.6	743.1	804.1	814.6	866	832.5	751.5	850.5	827.9	828.3	809.6	743.1	804.1	814.6	High	High	High	High
8.5978e+18	FALSE	High	IsMasterProtein	TGGT1_272630-t26_1-p1	transcript=TGGT1_272630-t26_1 | gene=TGGT1_272630 | organism=Toxoplasma_gondii_GT1 | gene_product=U6 snRNA-associated Sm-like protein LSm8 [Source:UniProtKB/TrEMBL;Acc:S7WJL9] | transcript_product=putative U6 snRNA-associated Sm family protein LSm8 | location=TGGT1_chrVIII:3831286-3832866(+) | protein_length=129 | sequence_SO=chromosome | SO=protein_coding_gene | is_pseudo=false	0.002	3.644	7	1	3	1	129	14.5	7.87	10.05	1	0.961	0.979	0.984	0.981	0.99	1.014	0.921	0.947	0.928	962.4	925.3	942.1	947.5	944.3	953.1	975.6	886	910.9	893.1	962.4	925.3	942.1	947.5	944.3	953.1	975.6	886	910.9	893.1	High	High	High	High
5.3404e+18	FALSE	Low	IsMasterProtein	TGGT1_295590-t26_1-p1	transcript=TGGT1_295590-t26_1 | gene=TGGT1_295590 | organism=Toxoplasma_gondii_GT1 | gene_product=hypothetical protein | transcript_product=hypothetical protein | location=TGGT1_chrIa:1690834-1699723(-) | protein_length=1506 | sequence_SO=chromosome | SO=protein_coding_gene | is_pseudo=false	0.058	1.114	1	1	1	1	1506	165.7	7.59	2.4	1	0.962	0.863	0.777	1.181	0.95	0.911	6.217	0.839	0.844	20.1	19.4	17.4	15.6	23.8	19.1	18.3	125.1	16.9	17	20.1	19.4	17.4	15.6	23.8	19.1	18.3	125.1	16.9	17	High	High	High	High
-8.51127e+18	FALSE	Medium	IsMasterProtein	TGGT1_206680-t26_1-p1	transcript=TGGT1_206680-t26_1 | gene=TGGT1_206680 | organism=Toxoplasma_gondii_GT1 | gene_product=hypothetical protein | transcript_product=hypothetical protein | location=TGGT1_chrVIIa:700484-702157(-) | protein_length=216 | sequence_SO=chromosome | SO=protein_coding_gene | is_pseudo=false	0.018	1.715	4	1	4	1	216	23.9	5.47	10.67	1	0.962	1.038	0.994	1.014	1.167	1.085	1.065	1.079	1.077	204.3	196.5	212.2	203.1	207.1	238.4	221.7	217.7	220.6	220.1	204.3	196.5	212.2	203.1	207.1	238.4	221.7	217.7	220.6	220.1	High	High	High	High
-3.40232e+18	FALSE	High	IsMasterProtein	TGGT1_273120-t26_1-p1	transcript=TGGT1_273120-t26_1 | gene=TGGT1_273120 | organism=Toxoplasma_gondii_GT1 | gene_product=SAG-related sequence SRS30C [Source:UniProtKB/TrEMBL;Acc:S7V443] | transcript_product=SAG-related sequence SRS30C | location=TGGT1_chrVIII:3643884-3645008(-) | protein_length=374 | sequence_SO=chromosome | SO=protein_coding_gene | is_pseudo=false	0	73.478	35	11	37	9	374	39.8	6.1	135.34	11	0.962	1.045	1.056	1.038	1.045	1.076	0.998	1.033	1.004	8367.8	8048	8741	8834.3	8682.6	8742.5	9003.4	8353.1	8643.5	8400	8367.8	8048	8741	8834.3	8682.6	8742.5	9003.4	8353.1	8643.5	8400	High	High	High	High
8.73907e+18	FALSE	High	IsMasterProtein	TGGT1_315740-t26_1-p1	transcript=TGGT1_315740-t26_1 | gene=TGGT1_315740 | organism=Toxoplasma_gondii_GT1 | gene_product=SAG-related sequence SRS54 [Source:UniProtKB/TrEMBL;Acc:S7UMC2] | transcript_product=SAG-related sequence SRS54 | location=TGGT1_chrXI:4886190-4887359(+) | protein_length=389 | sequence_SO=chromosome | SO=protein_coding_gene | is_pseudo=false	0	77.124	38	13	30	13	389	41.7	5.91	100.59	13	0.962	1.021	1.037	1.021	1.036	1.048	0.994	0.983	0.982	11355.4	10921.7	11592.8	11779	11596.9	11766.5	11903.8	11284.4	11164	11147.4	11355.4	10921.7	11592.8	11779	11596.9	11766.5	11903.8	11284.4	11164	11147.4	High	High	High	High
-5.5552e+18	FALSE	High	IsMasterProtein	TGGT1_202870-t26_1-p1	transcript=TGGT1_202870-t26_1 | gene=TGGT1_202870 | organism=Toxoplasma_gondii_GT1 | gene_product=SAP domain-containing protein [Source:UniProtKB/TrEMBL;Acc:S7W3P9] | transcript_product=SAP domain-containing protein | location=TGGT1_chrVIIa:2870446-2874438(+) | protein_length=394 | sequence_SO=chromosome | SO=protein_coding_gene | is_pseudo=false	0	106.323	35	12	46	12	394	42.3	9.61	176.52	12	0.962	1.027	1.023	1.01	1.024	1.026	0.87	0.973	0.984	16301	15680.9	16733.1	16680.9	16458	16690.4	16719.5	14183.4	15856.2	16033	16301	15680.9	16733.1	16680.9	16458	16690.4	16719.5	14183.4	15856.2	16033	High	High	High	High
-8.65627e+18	FALSE	High	IsMasterProtein	TGGT1_267140-t26_1-p1	transcript=TGGT1_267140-t26_1 | gene=TGGT1_267140 | organism=Toxoplasma_gondii_GT1 | gene_product=SAG-related sequence SRS38B [Source:UniProtKB/TrEMBL;Acc:S7UH64] | transcript_product=SAG-related sequence SRS38B | location=TGGT1_chrIX:600940-602112(+) | protein_length=390 | sequence_SO=chromosome | SO=protein_coding_gene | is_pseudo=false	0	55.963	29	12	28	11	390	41	5.76	94.19	12	0.962	1.026	1.028	0.984	1.02	1.031	0.987	0.988	0.981	13251	12747.3	13594.8	13622.3	13036	13509.4	13664.7	13075.9	13096.9	12995.6	13251	12747.3	13594.8	13622.3	13036	13509.4	13664.7	13075.9	13096.9	12995.6	High	High	High	High
-3.76034e+17	FALSE	High	IsMasterProtein	TGGT1_318210-t26_1-p1	transcript=TGGT1_318210-t26_1 | gene=TGGT1_318210 | organism=Toxoplasma_gondii_GT1 | gene_product=hypothetical protein | transcript_product=hypothetical protein | location=TGGT1_chrIV:1423684-1427283(-) | protein_length=1199 | sequence_SO=chromosome | SO=protein_coding_gene | is_pseudo=false	0	11.958	3	2	2	2	1199	126.5	5.2	8.91	2	0.962	0.931	1.027	1.049	1.064	1.068	0.957	0.966	0.946	149.9	144.2	139.5	154	157.2	159.4	160	143.5	144.8	141.8	149.9	144.2	139.5	154	157.2	159.4	160	143.5	144.8	141.8	High	High	High	High
-4.70443e+18	FALSE	High	IsMasterProtein	TGGT1_223040-t26_1-p1	transcript=TGGT1_223040-t26_1 | gene=TGGT1_223040 | organism=Toxoplasma_gondii_GT1 | gene_product=hypothetical protein | transcript_product=hypothetical protein | location=TGGT1_chrII:1361784-1363339(-) | protein_length=239 | sequence_SO=chromosome | SO=protein_coding_gene | is_pseudo=false	0	68.768	54	13	52	13	239	27.4	7.25	170.88	13	0.962	1.032	1.028	1.006	1.025	1.038	0.804	0.957	0.989	18758.5	18047.3	19361.8	19291.2	18878.4	19224.6	19468.9	15079.3	17943.8	18556.5	18758.5	18047.3	19361.8	19291.2	18878.4	19224.6	19468.9	15079.3	17943.8	18556.5	High	High	High	High
-2.03737e+18	FALSE	High	IsMasterProtein	TGGT1_319560-t26_1-p1	transcript=TGGT1_319560-t26_1 | gene=TGGT1_319560 | organism=Toxoplasma_gondii_GT1 | gene_product=EGF-like domain-containing protein [Source:UniProtKB/TrEMBL;Acc:S7VSV0] | transcript_product=microneme protein MIC3 | location=TGGT1_chrIV:856315-857588(+) | protein_length=383 | sequence_SO=chromosome | SO=protein_coding_gene | is_pseudo=false	0	293.392	66	21	418	21	383	40.5	6.64	1922.62	21	0.962	1.039	1.064	1.028	1.042	1.058	0.966	0.973	0.989	120045	115499	124744	127733	123415	125088	127057	116023	116772	118727	120045	115499	124744	127733	123415	125088	127057	116023	116772	118727	High	High	High	High
-8.17154e+18	FALSE	High	IsMasterProtein	TGGT1_208850-t26_1-p1	transcript=TGGT1_208850-t26_1 | gene=TGGT1_208850 | organism=Toxoplasma_gondii_GT1 | gene_product=SAG domain-containing protein [Source:UniProtKB/TrEMBL;Acc:A0A125YN91] | transcript_product=SAG-related sequence SRS11 | location=TGGT1_chrIb:924676-925248(+) | protein_length=190 | sequence_SO=chromosome | SO=protein_coding_gene | is_pseudo=false	0	21.414	25	3	9	3	190	19.5	7.91	34.96	3	0.962	1.045	1.009	0.981	0.973	0.999	0.839	0.814	0.811	3037.5	2922.7	3173.2	3066.4	2980.3	2956.3	3034.2	2547.2	2471.2	2462	3037.5	2922.7	3173.2	3066.4	2980.3	2956.3	3034.2	2547.2	2471.2	2462	High	High	High	High
-6.39205e+18	FALSE	High	IsMasterProtein	TGGT1_270250-t26_1-p1	transcript=TGGT1_270250-t26_1 | gene=TGGT1_270250 | organism=Toxoplasma_gondii_GT1 | gene_product=Dense granule protein GRA1 [Source:UniProtKB/TrEMBL;Acc:A0A125YRV6] | transcript_product=dense granule protein GRA1 | location=TGGT1_chrVIII:5308049-5308756(-) | protein_length=190 | sequence_SO=chromosome | SO=protein_coding_gene | is_pseudo=false	0	178.093	54	13	680	13	190	20.1	4.28	2485.88	13	0.962	1.018	1.036	1.017	1.032	1.05	0.764	0.942	0.941	150042	144392	152704	155449	152606	154830	157586	114632	141296	141253	150042	144392	152704	155449	152606	154830	157586	114632	141296	141253	High	High	High	High
-8.19535e+18	FALSE	High	IsMasterProtein	TGGT1_264900-t26_1-p1	transcript=TGGT1_264900-t26_1 | gene=TGGT1_264900 | organism=Toxoplasma_gondii_GT1 | gene_product=hypothetical protein | transcript_product=hypothetical protein | location=TGGT1_chrIX:1729306-1733861(-) | protein_length=887 | sequence_SO=chromosome | SO=protein_coding_gene | is_pseudo=false	0	8.601	2	2	2	2	887	94.8	6.49	5.52	2	0.962	0.945	1.045	1.046	1.039	1.129	1.182	1.053	1.126	252.4	242.9	238.6	263.7	264	262.2	285	298.2	265.6	284.3	252.4	242.9	238.6	263.7	264	262.2	285	298.2	265.6	284.3	High	High	High	High
-8.94317e+18	FALSE	High	IsMasterProtein	TGGT1_213280-t26_1-p1	transcript=TGGT1_213280-t26_1 | gene=TGGT1_213280 | organism=Toxoplasma_gondii_GT1 | gene_product=SAG-related sequence SRS25 [Source:UniProtKB/TrEMBL;Acc:A0A125YZD2] | transcript_product=SAG-related sequence SRS25 | location=TGGT1_chrV:764647-765222(-) | protein_length=191 | sequence_SO=chromosome | SO=protein_coding_gene | is_pseudo=false	0	66.802	37	4	42	4	191	20.8	6.06	183.23	4	0.962	1.026	1.048	1.004	1.046	1.063	0.91	0.96	0.976	19255.7	18531.3	19748.3	20183.9	19331.5	20140.6	20475.7	17528.9	18491.5	18784.3	19255.7	18531.3	19748.3	20183.9	19331.5	20140.6	20475.7	17528.9	18491.5	18784.3	High	High	High	High
-7.14775e+18	FALSE	High	IsMasterProtein	TGGT1_203460-t26_1-p1	transcript=TGGT1_203460-t26_1 | gene=TGGT1_203460 | organism=Toxoplasma_gondii_GT1 | gene_product=hypothetical protein | transcript_product=hypothetical protein | location=TGGT1_chrVIIa:2392698-2393577(+) | protein_length=119 | sequence_SO=chromosome | SO=protein_coding_gene | is_pseudo=false	0.002	3.91	8	1	1	1	119	13.2	6.15	3.47	1	0.963	0.969	0.999	1.056	1.018	1.062	0.844	0.927	0.994	580.5	558.8	562.5	579.9	612.8	591	616.6	489.7	538.2	576.9	580.5	558.8	562.5	579.9	612.8	591	616.6	489.7	538.2	576.9	High	High	High	High
-3.0991e+17	FALSE	High	IsMasterProtein	TGGT1_238010-t26_1-p1	transcript=TGGT1_238010-t26_1 | gene=TGGT1_238010 | organism=Toxoplasma_gondii_GT1 | gene_product=Ribosomal_L23eN domain-containing protein [Source:UniProtKB/TrEMBL;Acc:S7W653] | transcript_product=ribosomal protein RPL23A | location=TGGT1_chrVI:8631-10722(+) | protein_length=167 | sequence_SO=chromosome | SO=protein_coding_gene | is_pseudo=false	0	31.414	38	6	12	6	167	18.6	10.4	39.58	6	0.963	1.009	1.031	0.999	0.986	1.022	0.969	0.875	0.683	4966.2	4780.3	5008.4	5121.3	4960.3	4895.6	5076.5	4810.1	4346.9	3391.3	4966.2	4780.3	5008.4	5121.3	4960.3	4895.6	5076.5	4810.1	4346.9	3391.3	High	High	High	High
-4.09969e+18	FALSE	High	IsMasterProtein	TGGT1_263320-t26_1-p1	transcript=TGGT1_263320-t26_1 | gene=TGGT1_263320 | organism=Toxoplasma_gondii_GT1 | gene_product=hypothetical protein | transcript_product=hypothetical protein | location=TGGT1_chrVIIb:613192-614403(-) | protein_length=403 | sequence_SO=chromosome | SO=protein_coding_gene | is_pseudo=false	0	8.522	5	2	3	2	403	42.1	12.21	8.16	2	0.963	0.969	0.998	1.029	0.965	0.986	0.934	0.959	1.137	1050.7	1011.4	1017.8	1048.3	1081.4	1014.3	1036.2	981.1	1007.2	1194.3	1050.7	1011.4	1017.8	1048.3	1081.4	1014.3	1036.2	981.1	1007.2	1194.3	High	High	High	High
-6.51045e+18	FALSE	High	IsMasterProtein	TGGT1_217555-t26_1-p1	transcript=TGGT1_217555-t26_1 | gene=TGGT1_217555 | organism=Toxoplasma_gondii_GT1 | gene_product=hypothetical protein | transcript_product=hypothetical protein | location=TGGT1_chrXII:1846906-1848251(+) | protein_length=108 | sequence_SO=chromosome | SO=protein_coding_gene | is_pseudo=false	0	13.163	30	2	2	2	108	11.6	8.29	9.63	2	0.963	0.99	1.062	1.092	1.089	1.082	0.644	0.985	1.094	482.5	464.5	477.9	512.6	527	525.7	522.1	310.8	475.3	527.6	482.5	464.5	477.9	512.6	527	525.7	522.1	310.8	475.3	527.6	High	High	High	High
-3.46785e+18	FALSE	High	IsMasterProtein	TGGT1_230410-t26_1-p1	transcript=TGGT1_230410-t26_1 | gene=TGGT1_230410 | organism=Toxoplasma_gondii_GT1 | gene_product=Thioredoxin domain-containing protein [Source:UniProtKB/TrEMBL;Acc:S7V2Y3] | transcript_product=peroxiredoxin PRX3 | location=TGGT1_chrVIII:753559-755687(-) | protein_length=283 | sequence_SO=chromosome | SO=protein_coding_gene | is_pseudo=false	0	89.573	42	13	82	13	283	30.4	8.78	279.9	13	0.963	1.043	1.02	0.979	1	1.002	0.931	0.943	0.935	29744.9	28633.8	31031.3	30344.4	29113.8	29745.3	29811.8	27685.6	28053.9	27798.7	29744.9	28633.8	31031.3	30344.4	29113.8	29745.3	29811.8	27685.6	28053.9	27798.7	High	High	High	High
-5.33563e+18	FALSE	High	IsMasterProtein	TGGT1_258730-t26_1-p1	transcript=TGGT1_258730-t26_1 | gene=TGGT1_258730 | organism=Toxoplasma_gondii_GT1 | gene_product=hypothetical protein | transcript_product=hypothetical protein | location=TGGT1_chrVIIb:3186289-3187859(+) | protein_length=151 | sequence_SO=chromosome | SO=protein_coding_gene | is_pseudo=false	0	29.897	42	9	18	9	151	16.7	9.06	64.36	9	0.963	0.995	0.99	0.927	0.981	0.971	0.831	0.913	0.896	6373.4	6135.3	6344.2	6306.7	5906.6	6254.6	6189.3	5299	5821.3	5708.8	6373.4	6135.3	6344.2	6306.7	5906.6	6254.6	6189.3	5299	5821.3	5708.8	High	High	High	High
-7.72993e+18	FALSE	High	IsMasterProtein	TGGT1_311210-t26_1-p1	transcript=TGGT1_311210-t26_1 | gene=TGGT1_311210 | organism=Toxoplasma_gondii_GT1 | gene_product=hypothetical protein | transcript_product=hypothetical protein | location=TGGT1_chrXI:1821719-1832040(+) | protein_length=1817 | sequence_SO=chromosome | SO=protein_coding_gene | is_pseudo=false	0	20.782	3	4	4	4	1817	192.1	6.48	14.99	4	0.963	0.993	1.015	1.052	0.996	1.011	1.088	1.04	1.039	660.4	635.8	656	670.3	694.9	657.7	667.8	718.4	686.6	686.5	660.4	635.8	656	670.3	694.9	657.7	667.8	718.4	686.6	686.5	High	High	High	High
-2.37228e+18	FALSE	High	IsMasterProtein	TGGT1_257380-t26_1-p1	transcript=TGGT1_257380-t26_1 | gene=TGGT1_257380 | organism=Toxoplasma_gondii_GT1 | gene_product=hypothetical protein | transcript_product=hypothetical protein | location=TGGT1_chrVIIb:4013607-4015889(+) | protein_length=218 | sequence_SO=chromosome | SO=protein_coding_gene | is_pseudo=false	0	87.462	59	8	38	8	218	23.8	6.93	159.75	8	0.963	0.999	1.072	1.035	1.088	1.097	0.982	0.945	0.966	7842.2	7550	7837.8	8410.4	8116.3	8531.6	8599.8	7702.8	7409.8	7575	7842.2	7550	7837.8	8410.4	8116.3	8531.6	8599.8	7702.8	7409.8	7575	High	High	High	High
4.57363e+18	FALSE	High	IsMasterProtein	TGGT1_305930-t26_1-p1	transcript=TGGT1_305930-t26_1 | gene=TGGT1_305930 | organism=Toxoplasma_gondii_GT1 | gene_product=hypothetical protein | transcript_product=hypothetical protein | location=TGGT1_chrIX:5457389-5459694(-) | protein_length=234 | sequence_SO=chromosome | SO=protein_coding_gene | is_pseudo=false	0.008	2.28	6	1	1	1	234	26.1	6.84	3.31	1	0.963	1.177	1.133	1.173	1.043	0.956	1.036	0.941	1.101	47	45.2	55.3	53.2	55.1	49	44.9	48.7	44.2	51.7	47	45.2	55.3	53.2	55.1	49	44.9	48.7	44.2	51.7	High	High	High	High
8.6898e+18	FALSE	High	IsMasterProtein	TGGT1_269650-t26_1-p1	transcript=TGGT1_269650-t26_1 | gene=TGGT1_269650 | organism=Toxoplasma_gondii_GT1 | gene_product=FFD and TFG box motifs protein [Source:UniProtKB/TrEMBL;Acc:A0A125YUH5] | transcript_product=FFD and TFG box motifs protein | location=TGGT1_chrVIII:5714889-5717952(+) | protein_length=492 | sequence_SO=chromosome | SO=protein_coding_gene | is_pseudo=false	0	88.55	27	11	35	11	492	51.4	7.14	138.78	11	0.963	1.033	1.024	1.008	1.018	1.024	0.808	0.954	0.953	10666.8	10271.2	11022.1	10920.1	10749.4	10855.8	10923	8622	10179.1	10165.8	10666.8	10271.2	11022.1	10920.1	10749.4	10855.8	10923	8622	10179.1	10165.8	High	High	High	High
-7.84963e+18	FALSE	High	IsMasterProtein	TGGT1_315690-t26_1-p1	transcript=TGGT1_315690-t26_1 | gene=TGGT1_315690 | organism=Toxoplasma_gondii_GT1 | gene_product=J domain-containing protein [Source:UniProtKB/TrEMBL;Acc:S7UM22] | transcript_product=DnaJ domain-containing protein | location=TGGT1_chrXI:4848691-4851649(+) | protein_length=294 | sequence_SO=chromosome | SO=protein_coding_gene | is_pseudo=false	0	63.451	44	11	21	11	294	34.3	8.9	87.63	11	0.963	1.012	1.001	0.989	1.025	1.033	0.964	0.977	0.919	10772.9	10374.1	10900.5	10783.4	10658.2	11044.7	11131.4	10390.4	10527	9902.4	10772.9	10374.1	10900.5	10783.4	10658.2	11044.7	11131.4	10390.4	10527	9902.4	High	High	High	High
-8.19715e+18	FALSE	High	IsMasterProtein	TGGT1_255890-t26_1-p1	transcript=TGGT1_255890-t26_1 | gene=TGGT1_255890 | organism=Toxoplasma_gondii_GT1 | gene_product=Pyr_redox_2 domain-containing protein [Source:UniProtKB/TrEMBL;Acc:S7WFC7] | transcript_product=pyridine nucleotide-disulfide oxidoreductase domain-containing protein | location=TGGT1_chrVIIb:4557209-4567068(-) | protein_length=787 | sequence_SO=chromosome | SO=protein_coding_gene | is_pseudo=false	0	82.188	22	14	23	14	787	85.8	6.02	85.81	14	0.963	1.001	1.022	1.013	1.022	1.047	1.011	0.964	0.986	7735.6	7449.3	7746.7	7904.7	7839.4	7905.7	8102.3	7821.4	7456.6	7630.7	7735.6	7449.3	7746.7	7904.7	7839.4	7905.7	8102.3	7821.4	7456.6	7630.7	High	High	High	High
7.30051e+18	FALSE	High	IsMasterProtein	TGGT1_224130-t26_1-p1	transcript=TGGT1_224130-t26_1 | gene=TGGT1_224130 | organism=Toxoplasma_gondii_GT1 | gene_product=RRM domain-containing protein [Source:UniProtKB/TrEMBL;Acc:A0A125YI44] | transcript_product=hypothetical protein | location=TGGT1_chrX:3217756-3218599(-) | protein_length=154 | sequence_SO=chromosome | SO=protein_coding_gene | is_pseudo=false	0	20.027	25	2	4	2	154	16.6	5.01	19.41	2	0.963	1.051	1.07	1.038	1.034	1.031	0.983	0.985	1.07	967.7	932	1017.3	1035.1	1004.1	1000.9	997.3	951.1	953.1	1035.7	967.7	932	1017.3	1035.1	1004.1	1000.9	997.3	951.1	953.1	1035.7	High	High	High	High
4.0564e+18	FALSE	High	IsMasterProtein	TGGT1_310070-t26_1-p1	transcript=TGGT1_310070-t26_1 | gene=TGGT1_310070 | organism=Toxoplasma_gondii_GT1 | gene_product=Methyltranfer_dom domain-containing protein [Source:UniProtKB/TrEMBL;Acc:A0A125YVY5] | transcript_product=putative methyltransferase | location=TGGT1_chrXI:1000351-1003674(-) | protein_length=224 | sequence_SO=chromosome | SO=protein_coding_gene | is_pseudo=false	0	122.869	71	13	46	13	224	25.3	5.68	188.25	13	0.963	1.031	1.045	1.026	1.07	1.074	1.031	1.019	0.998	13846.3	13335.2	14273.7	14468	14208.5	14819.5	14867.4	14282	14109.8	13814.3	13846.3	13335.2	14273.7	14468	14208.5	14819.5	14867.4	14282	14109.8	13814.3	High	High	High	High
-3.5831e+18	FALSE	High	IsMasterProtein	TGGT1_204530-t26_1-p1	transcript=TGGT1_204530-t26_1 | gene=TGGT1_204530 | organism=Toxoplasma_gondii_GT1 | gene_product=Microneme protein MIC11 [Source:UniProtKB/TrEMBL;Acc:A0A125YJF7] | transcript_product=microneme protein MIC11 | location=TGGT1_chrVIIa:1632334-1633282(-) | protein_length=204 | sequence_SO=chromosome | SO=protein_coding_gene | is_pseudo=false	0	140.609	60	17	351	17	204	22.4	5.19	1442.45	17	0.963	0.985	0.997	0.994	0.992	1.027	0.808	0.934	0.922	60942.3	58694.7	60046.1	60755.2	60574.4	60438	62565.8	49223.2	56914.4	56198.6	60942.3	58694.7	60046.1	60755.2	60574.4	60438	62565.8	49223.2	56914.4	56198.6	High	High	High	High
-9.10547e+18	FALSE	High	IsMasterProtein	TGGT1_217890-t26_1-p1	transcript=TGGT1_217890-t26_1 | gene=TGGT1_217890 | organism=Toxoplasma_gondii_GT1 | gene_product=Peroxiredoxin [Source:UniProtKB/TrEMBL;Acc:A0A125YNG7] | transcript_product=putative alkyl hydroperoxide reductase/ Thiol specific antioxidant/ Mal allergen | location=TGGT1_chrXII:2143499-2144089(-) | protein_length=196 | sequence_SO=chromosome | SO=protein_coding_gene | is_pseudo=false	0	159.96	68	16	192	16	196	21.7	6.87	620.27	16	0.963	1.009	1.027	0.985	1.017	1.037	0.978	1.002	0.958	53013.4	51059.2	53467.4	54420.2	52203.8	53909.9	54988	51861.6	53095.6	50805.6	53013.4	51059.2	53467.4	54420.2	52203.8	53909.9	54988	51861.6	53095.6	50805.6	High	High	High	High
-6.96893e+18	FALSE	High	IsMasterProtein	TGGT1_310900-t26_1-p1	transcript=TGGT1_310900-t26_1 | gene=TGGT1_310900 | organism=Toxoplasma_gondii_GT1 | gene_product=AP2 domain transcription factor AP2XI-2 [Source:UniProtKB/TrEMBL;Acc:S7UT79] | transcript_product=AP2 domain transcription factor AP2XI-2 | location=TGGT1_chrXI:1609168-1617013(-) | protein_length=2243 | sequence_SO=chromosome | SO=protein_coding_gene | is_pseudo=false	0	124.716	14	23	29	23	2243	232.6	6.24	109.76	23	0.963	0.983	0.984	1.002	0.965	0.983	1.027	0.947	1.003	5016.9	4832.4	4932.3	4934.7	5028.9	4842.2	4931.1	5151	4753.4	5032	5016.9	4832.4	4932.3	4934.7	5028.9	4842.2	4931.1	5151	4753.4	5032	High	High	High	High
-3.51938e+18	FALSE	High	IsMasterProtein	TGGT1_265250-t26_1-p1	transcript=TGGT1_265250-t26_1 | gene=TGGT1_265250 | organism=Toxoplasma_gondii_GT1 | gene_product=RRM domain-containing protein [Source:UniProtKB/TrEMBL;Acc:S7UGW5] | transcript_product=RNA recognition motif-containing protein | location=TGGT1_chrIX:1478253-1487922(+) | protein_length=1564 | sequence_SO=chromosome | SO=protein_coding_gene | is_pseudo=false	0	326.873	41	51	107	51	1564	160.1	8.51	424.91	51	0.963	1	1.034	1.028	1.022	1.049	1.013	0.985	0.988	28575.1	27527.6	28565.3	29534.2	29361.1	29209.6	29967.7	28957.3	28155.6	28230.7	28575.1	27527.6	28565.3	29534.2	29361.1	29209.6	29967.7	28957.3	28155.6	28230.7	High	High	High	High
-7.75028e+18	FALSE	High	IsMasterProtein	TGGT1_224730-t26_1-p1	transcript=TGGT1_224730-t26_1 | gene=TGGT1_224730 | organism=Toxoplasma_gondii_GT1 | gene_product=hypothetical protein | transcript_product=hypothetical protein | location=TGGT1_chrX:2757445-2761255(+) | protein_length=339 | sequence_SO=chromosome | SO=protein_coding_gene | is_pseudo=false	0	19.988	16	4	5	4	339	36.1	4.79	15.75	4	0.963	1.004	0.959	0.939	0.984	0.966	0.865	0.918	0.908	1556.6	1499.6	1562.8	1492.4	1462.1	1531.8	1503	1346.2	1428.3	1413.9	1556.6	1499.6	1562.8	1492.4	1462.1	1531.8	1503	1346.2	1428.3	1413.9	High	High	High	High
-4.39268e+18	FALSE	High	IsMasterProtein	TGGT1_257060-t26_1-p1	transcript=TGGT1_257060-t26_1 | gene=TGGT1_257060 | organism=Toxoplasma_gondii_GT1 | gene_product=SUI1 domain-containing protein [Source:UniProtKB/TrEMBL;Acc:A0A125YVW8] | transcript_product=translation initiation factor sui1 protein | location=TGGT1_chrVIIb:4182663-4185551(+) | protein_length=282 | sequence_SO=chromosome | SO=protein_coding_gene | is_pseudo=false	0	33.562	20	6	13	6	282	30.3	5.26	40.78	6	0.963	1.021	1.014	0.989	0.985	1.014	0.965	0.931	0.917	5443.1	5244.4	5559.8	5519.1	5385.1	5361.4	5518.9	5250.1	5066.7	4991.1	5443.1	5244.4	5559.8	5519.1	5385.1	5361.4	5518.9	5250.1	5066.7	4991.1	High	High	High	High
4.26284e+18	FALSE	High	IsMasterProtein	TGGT1_251680-t26_1-p1	transcript=TGGT1_251680-t26_1 | gene=TGGT1_251680 | organism=Toxoplasma_gondii_GT1 | gene_product=TCTP domain-containing protein [Source:UniProtKB/TrEMBL;Acc:A0A125YGX3] | transcript_product=putative histamine-releasing factor | location=TGGT1_chrXII:5449838-5451669(-) | protein_length=171 | sequence_SO=chromosome | SO=protein_coding_gene | is_pseudo=false	0	88.626	72	11	128	11	171	19.2	4.69	566.02	11	0.964	1.011	0.973	0.949	0.976	0.995	0.883	0.881	0.85	24132.9	23255.5	24395.9	23484.7	22898.2	23558.5	24007.7	21309.6	21261.1	20503.2	24132.9	23255.5	24395.9	23484.7	22898.2	23558.5	24007.7	21309.6	21261.1	20503.2	High	High	High	High
9.99664e+17	FALSE	High	IsMasterProtein	TGGT1_268970-t26_1-p1	transcript=TGGT1_268970-t26_1 | gene=TGGT1_268970 | organism=Toxoplasma_gondii_GT1 | gene_product=hypothetical protein | transcript_product=hypothetical protein | location=TGGT1_chrVIII:6173540-6174541(+) | protein_length=333 | sequence_SO=chromosome | SO=protein_coding_gene | is_pseudo=false	0	18.781	8	2	4	2	333	36.2	8.24	16.86	2	0.964	0.904	1.023	1.032	0.959	1	0.997	0.98	1.007	885.2	853.1	800.4	905.3	913.9	848.8	884.9	882.8	867.1	891.8	885.2	853.1	800.4	905.3	913.9	848.8	884.9	882.8	867.1	891.8	High	High	High	High
-3.4367e+18	FALSE	High	IsMasterProtein	TGGT1_211290-t26_1-p1	transcript=TGGT1_211290-t26_1 | gene=TGGT1_211290 | organism=Toxoplasma_gondii_GT1 | gene_product=Rhoptry protein ROP15 [Source:UniProtKB/TrEMBL;Acc:S7UKJ6] | transcript_product=rhoptry protein ROP15 | location=TGGT1_chrIV:1780392-1782862(-) | protein_length=333 | sequence_SO=chromosome | SO=protein_coding_gene | is_pseudo=false	0	135.661	52	14	97	14	333	36.6	8.7	381.47	14	0.964	1.028	1.01	0.986	1.011	1.02	0.933	0.922	0.887	31872.2	30716.3	32765	32184.1	31426.8	32234.8	32515.1	29724	29379.7	28282.5	31872.2	30716.3	32765	32184.1	31426.8	32234.8	32515.1	29724	29379.7	28282.5	High	High	High	High
1.9654e+18	FALSE	High	IsMasterProtein	TGGT1_244530-t26_1-p1	transcript=TGGT1_244530-t26_1 | gene=TGGT1_244530 | organism=Toxoplasma_gondii_GT1 | gene_product=hypothetical protein | transcript_product=hypothetical protein | location=TGGT1_chrVI:3259589-3261391(-) | protein_length=600 | sequence_SO=chromosome | SO=protein_coding_gene | is_pseudo=false	0	99.238	28	12	24	12	600	64	4.73	104.97	12	0.964	0.995	1.016	1.04	1.043	1.058	0.983	0.954	0.993	5280.5	5089.6	5253.5	5364.1	5493	5505	5587.4	5192.7	5035.3	5241.6	5280.5	5089.6	5253.5	5364.1	5493	5505	5587.4	5192.7	5035.3	5241.6	High	High	High	High
7.43162e+18	FALSE	High	IsMasterProtein	TGGT1_209800-t26_1-p1	transcript=TGGT1_209800-t26_1 | gene=TGGT1_209800 | organism=Toxoplasma_gondii_GT1 | gene_product=Formate/nitrite transporter protein [Source:UniProtKB/TrEMBL;Acc:A0A125YSC6] | transcript_product=formate/nitrite transporter protein | location=TGGT1_chrIb:1476667-1477905(+) | protein_length=412 | sequence_SO=chromosome | SO=protein_coding_gene | is_pseudo=false	0	40.907	25	10	33	10	412	44.3	5.52	98.88	10	0.964	0.981	0.99	0.992	1	1.026	1.004	1.001	0.979	11266.2	10859.3	11055.7	11157.3	11174	11266	11563.6	11314.1	11272.4	11033.7	11266.2	10859.3	11055.7	11157.3	11174	11266	11563.6	11314.1	11272.4	11033.7	High	High	High	High
-2.63919e+18	FALSE	High	IsMasterProtein	TGGT1_229420-t26_1-p1	transcript=TGGT1_229420-t26_1 | gene=TGGT1_229420 | organism=Toxoplasma_gondii_GT1 | gene_product=Cytochrome c domain-containing protein [Source:UniProtKB/TrEMBL;Acc:A0A125YS53] | transcript_product=putative cytochrome c | location=TGGT1_chrVIII:244283-245274(-) | protein_length=163 | sequence_SO=chromosome | SO=protein_coding_gene | is_pseudo=false	0	32.847	33	4	21	4	163	18.1	8.6	89.74	4	0.964	1.018	1.018	1.005	1.058	1.075	0.925	1.016	1.037	2812.8	2711.4	2864.2	2864.3	2825.8	2975.9	3025.2	2602.1	2858.5	2917.4	2812.8	2711.4	2864.2	2864.3	2825.8	2975.9	3025.2	2602.1	2858.5	2917.4	High	High	High	High
-6.66377e+18	FALSE	High	IsMasterProtein	TGGT1_320120-t26_1-p1	transcript=TGGT1_320120-t26_1 | gene=TGGT1_320120 | organism=Toxoplasma_gondii_GT1 | gene_product=HIT domain-containing protein [Source:UniProtKB/TrEMBL;Acc:A0A125YWX1] | transcript_product=diadenosine tetraphosphatase family protein | location=TGGT1_chrIV:426737-428308(+) | protein_length=228 | sequence_SO=chromosome | SO=protein_coding_gene | is_pseudo=false	0	16.276	12	3	3	3	228	25.4	8.76	11.26	3	0.964	0.96	0.967	0.985	0.975	1.072	1.036	1.002	1.04	537.1	517.7	515.5	519.4	529.3	523.4	575.7	556.6	538.4	558.5	537.1	517.7	515.5	519.4	529.3	523.4	575.7	556.6	538.4	558.5	High	High	High	High
-4.26055e+17	FALSE	High	IsMasterProtein	TGGT1_203630-t26_1-p1	transcript=TGGT1_203630-t26_1 | gene=TGGT1_203630 | organism=Toxoplasma_gondii_GT1 | gene_product=Ribosomal protein RPL44 [Source:UniProtKB/TrEMBL;Acc:A0A125YNY0] | transcript_product=ribosomal protein RPL44 | location=TGGT1_chrVIIa:2292915-2293974(-) | protein_length=105 | sequence_SO=chromosome | SO=protein_coding_gene | is_pseudo=false	0	6.517	15	2	6	2	105	12.1	10.56	18.02	2	0.964	1	1.018	0.966	0.962	0.96	0.992	0.986	0.598	3800.9	3664.2	3799.5	3869.2	3671	3657.5	3650.7	3770.7	3746.4	2273.4	3800.9	3664.2	3799.5	3869.2	3671	3657.5	3650.7	3770.7	3746.4	2273.4	High	High	High	High
3.56001e+18	FALSE	High	IsMasterProtein	TGGT1_308840-t26_1-p1	transcript=TGGT1_308840-t26_1 | gene=TGGT1_308840 | organism=Toxoplasma_gondii_GT1 | gene_product=SAG-related sequence SRS51 [Source:UniProtKB/TrEMBL;Acc:S7W107] | transcript_product=SAG-related sequence SRS51 | location=TGGT1_chrXI:258885-259967(+) | protein_length=360 | sequence_SO=chromosome | SO=protein_coding_gene | is_pseudo=false	0	177.603	44	14	167	14	360	38	6.2	762.41	14	0.964	1.06	1.073	1.012	1.047	1.046	0.977	1.039	0.996	49509.5	47729.8	52493.7	53101.6	50093.5	51834.3	51763.1	48355.1	51420.8	49313.5	49509.5	47729.8	52493.7	53101.6	50093.5	51834.3	51763.1	48355.1	51420.8	49313.5	High	High	High	High
-3.52212e+18	FALSE	High	IsMasterProtein	TGGT1_300240-t26_1-p1	transcript=TGGT1_300240-t26_1 | gene=TGGT1_300240 | organism=Toxoplasma_gondii_GT1 | gene_product=t-SNARE coiled-coil homology domain-containing protein [Source:UniProtKB/TrEMBL;Acc:A0A125YUL5] | transcript_product=putative syntaxin 6 protein | location=TGGT1_chrXII:99372-102470(-) | protein_length=237 | sequence_SO=chromosome | SO=protein_coding_gene | is_pseudo=false	0	9.344	11	3	4	3	237	26.9	6.54	11.73	3	0.964	1.034	1.081	1.078	1.08	1.08	1.142	1.121	1.106	2440.5	2353	2524.3	2638.6	2630.8	2636.2	2636.5	2786.1	2734.6	2698.5	2440.5	2353	2524.3	2638.6	2630.8	2636.2	2636.5	2786.1	2734.6	2698.5	High	High	High	High
-4.04854e+18	FALSE	High	IsMasterProtein	TGGT1_294890-t26_1-p1	transcript=TGGT1_294890-t26_1 | gene=TGGT1_294890 | organism=Toxoplasma_gondii_GT1 | gene_product=hypothetical protein | transcript_product=hypothetical protein | location=TGGT1_chrIa:1232009-1234201(+) | protein_length=630 | sequence_SO=chromosome | SO=protein_coding_gene | is_pseudo=false	0	15.635	6	3	4	3	630	68.9	8.88	13.21	3	0.964	1.026	1.017	1.042	1.023	1.001	0.95	0.976	0.992	913.1	880.4	936.5	929	951.6	933.8	913.7	867.8	891.2	906.1	913.1	880.4	936.5	929	951.6	933.8	913.7	867.8	891.2	906.1	High	High	High	High
6.02739e+16	FALSE	High	IsMasterProtein	TGGT1_284630-t26_1-p1	transcript=TGGT1_284630-t26_1 | gene=TGGT1_284630 | organism=Toxoplasma_gondii_GT1 | gene_product=hypothetical protein | transcript_product=hypothetical protein | location=TGGT1_chrV:2499413-2499643(-) | protein_length=76 | sequence_SO=chromosome | SO=protein_coding_gene | is_pseudo=false	0	25.085	43	4	7	4	76	8.9	9.5	23.34	4	0.964	1.07	1.095	1.052	1.093	1.085	0.982	1.05	1.092	3017.7	2909.6	3229.4	3305.7	3173.8	3298	3275.5	2964.3	3168.1	3294.7	3017.7	2909.6	3229.4	3305.7	3173.8	3298	3275.5	2964.3	3168.1	3294.7	High	High	High	High
8.73317e+18	FALSE	High	IsMasterProtein	TGGT1_270740-t26_1-p1	transcript=TGGT1_270740-t26_1 | gene=TGGT1_270740 | organism=Toxoplasma_gondii_GT1 | gene_product=Cwf15/Cwc15 cell cycle control protein [Source:UniProtKB/TrEMBL;Acc:A0A125YMX9] | transcript_product=Cwf15/Cwc15 cell cycle control protein | location=TGGT1_chrVIII:5026969-5030327(-) | protein_length=210 | sequence_SO=chromosome | SO=protein_coding_gene | is_pseudo=false	0	20.637	18	6	11	6	210	24	6.6	33.87	6	0.964	1.009	1.056	1.052	1.05	1.086	0.856	0.996	1.018	2592.1	2499.5	2614.7	2738.3	2725.7	2721.5	2816.2	2218.9	2582.4	2638	2592.1	2499.5	2614.7	2738.3	2725.7	2721.5	2816.2	2218.9	2582.4	2638	High	High	High	High
6.26801e+18	FALSE	High	IsMasterProtein	TGGT1_273130-t26_1-p1	transcript=TGGT1_273130-t26_1 | gene=TGGT1_273130 | organism=Toxoplasma_gondii_GT1 | gene_product=SAG-related sequence SRS30A [Source:UniProtKB/TrEMBL;Acc:S7WJQ2] | transcript_product=SAG-related sequence SRS30A | location=TGGT1_chrVIII:3638958-3640118(-) | protein_length=362 | sequence_SO=chromosome | SO=protein_coding_gene | is_pseudo=false	0	157.051	55	18	66	18	362	38.5	5.33	258.47	18	0.964	1.021	1.046	1.025	1.047	1.064	0.974	0.991	0.978	23847.1	22996.3	24340.9	24943.1	24437	24979.3	25377.9	23227.1	23640.4	23333.4	23847.1	22996.3	24340.9	24943.1	24437	24979.3	25377.9	23227.1	23640.4	23333.4	High	High	High	High
-3.55587e+18	FALSE	High	IsMasterProtein	TGGT1_248290-t26_1-p1	transcript=TGGT1_248290-t26_1 | gene=TGGT1_248290 | organism=Toxoplasma_gondii_GT1 | gene_product=WD domain, G-beta repeat-containing protein [Source:UniProtKB/TrEMBL;Acc:S7V0K5] | transcript_product=WD domain, G-beta repeat-containing protein | location=TGGT1_chrXII:3712991-3725587(+) | protein_length=3345 | sequence_SO=chromosome | SO=protein_coding_gene | is_pseudo=false	0	11.456	1	4	5	4	3345	358.3	7.59	12.68	4	0.964	1.078	1.039	0.982	1.06	1.033	1.138	1.062	1.029	455.3	439.1	490.6	472.9	447	482.8	470.3	517.9	483.6	468.5	455.3	439.1	490.6	472.9	447	482.8	470.3	517.9	483.6	468.5	High	High	High	High
-1.46906e+18	FALSE	High	IsMasterProtein	TGGT1_234930-t26_1-p1	transcript=TGGT1_234930-t26_1 | gene=TGGT1_234930 | organism=Toxoplasma_gondii_GT1 | gene_product=SAG-related sequence SRS43 [Source:UniProtKB/TrEMBL;Acc:S7UWE3] | transcript_product=SAG-related sequence SRS43 | location=TGGT1_chrX:4446445-4447602(-) | protein_length=385 | sequence_SO=chromosome | SO=protein_coding_gene | is_pseudo=false	0	77.448	32	12	38	11	385	40.8	6.7	128.31	12	0.964	1.069	1.041	1.02	1.053	1.068	1.035	1.009	1.017	7810.2	7532.7	8347.4	8130.3	7966.1	8222.5	8342.7	8084.8	7878	7942.9	7810.2	7532.7	8347.4	8130.3	7966.1	8222.5	8342.7	8084.8	7878	7942.9	High	High	High	High
-6.67145e+18	FALSE	High	IsMasterProtein	TGGT1_219750-t26_1-p1	transcript=TGGT1_219750-t26_1 | gene=TGGT1_219750 | organism=Toxoplasma_gondii_GT1 | gene_product=Cytochrome c domain-containing protein [Source:UniProtKB/TrEMBL;Acc:A0A125YIF4] | transcript_product=putative cytochrome c | location=TGGT1_chrXII:601202-602193(-) | protein_length=115 | sequence_SO=chromosome | SO=protein_coding_gene | is_pseudo=false	0	81.997	71	9	105	9	115	12.4	9.19	325.15	9	0.965	1.008	1.013	0.985	1.022	1.024	0.735	0.933	0.974	36057.2	34784	36338.9	36530.5	35507.6	36838.8	36914.3	26515	33635.2	35124	36057.2	34784	36338.9	36530.5	35507.6	36838.8	36914.3	26515	33635.2	35124	High	High	High	High
-5.38468e+18	FALSE	High	IsMasterProtein	TGGT1_220500-t26_1-p1	transcript=TGGT1_220500-t26_1 | gene=TGGT1_220500 | organism=Toxoplasma_gondii_GT1 | gene_product=UBX domain-containing protein [Source:UniProtKB/TrEMBL;Acc:S7UH77] | transcript_product=UBX domain-containing protein | location=TGGT1_chrV:321412-325538(+) | protein_length=387 | sequence_SO=chromosome | SO=protein_coding_gene | is_pseudo=false	0	84.68	42	18	57	18	387	43.1	8.56	202.07	18	0.965	1.025	1.02	0.988	1.003	1.011	0.868	0.94	0.956	15701.2	15147	16096	16013	15518	15752.4	15869.4	13625.8	14753.8	15006.4	15701.2	15147	16096	16013	15518	15752.4	15869.4	13625.8	14753.8	15006.4	High	High	High	High
1.95447e+18	FALSE	High	IsMasterProtein	TGGT1_309590-t26_1-p1	transcript=TGGT1_309590-t26_1 | gene=TGGT1_309590 | organism=Toxoplasma_gondii_GT1 | gene_product=Rhoptry protein ROP1 [Source:UniProtKB/TrEMBL;Acc:S7W7R3] | transcript_product=rhoptry protein ROP1 | location=TGGT1_chrXI:707942-709312(+) | protein_length=456 | sequence_SO=chromosome | SO=protein_coding_gene | is_pseudo=false	0	110.666	32	15	318	15	456	49.5	5.22	1322.71	15	0.965	0.963	0.99	0.974	0.968	1	0.957	0.959	0.964	57212.8	55194.6	55073.5	56612.9	55731.8	55388.9	57191.4	54764.8	54878.8	55127.6	57212.8	55194.6	55073.5	56612.9	55731.8	55388.9	57191.4	54764.8	54878.8	55127.6	High	High	High	High
3.87662e+18	FALSE	High	IsMasterProtein	TGGT1_228230-t26_1-p1	transcript=TGGT1_228230-t26_1 | gene=TGGT1_228230 | organism=Toxoplasma_gondii_GT1 | gene_product=hypothetical protein | transcript_product=hypothetical protein | location=TGGT1_chrX:378932-383473(+) | protein_length=1256 | sequence_SO=chromosome | SO=protein_coding_gene | is_pseudo=false	0	12.867	3	3	5	3	1256	128.7	4.83	16.75	3	0.965	1.265	1.106	1.101	1.003	0.994	1.098	0.955	0.975	54.8	52.9	69.4	60.7	60.4	55	54.5	60.2	52.4	53.5	54.8	52.9	69.4	60.7	60.4	55	54.5	60.2	52.4	53.5	High	High	High	High
-1.59467e+18	FALSE	High	IsMasterProtein	TGGT1_310420-t26_1-p1	transcript=TGGT1_310420-t26_1 | gene=TGGT1_310420 | organism=Toxoplasma_gondii_GT1 | gene_product=hypothetical protein | transcript_product=hypothetical protein | location=TGGT1_chrXI:1293202-1295045(-) | protein_length=210 | sequence_SO=chromosome | SO=protein_coding_gene | is_pseudo=false	0	28.407	15	2	20	2	210	22.9	5.33	92.85	2	0.965	0.95	1.009	0.962	0.995	1.004	0.787	0.971	1.167	8680.6	8374.8	8246.4	8759.8	8353.7	8635.1	8718.9	6831.5	8426.7	10132.6	8680.6	8374.8	8246.4	8759.8	8353.7	8635.1	8718.9	6831.5	8426.7	10132.6	High	High	High	High
4.78522e+17	FALSE	High	IsMasterProtein	TGGT1_316600-t26_1-p1	transcript=TGGT1_316600-t26_1 | gene=TGGT1_316600 | organism=Toxoplasma_gondii_GT1 | gene_product=hypothetical protein | transcript_product=hypothetical protein | location=TGGT1_chrXI:5359580-5361336(+) | protein_length=131 | sequence_SO=chromosome | SO=protein_coding_gene | is_pseudo=false	0	10.773	17	1	1	1	131	13.7	11.41	5.97	1	0.965	1.001	1.062	1.085	1.014	1.105	0.919	0.984	1.062	239.9	231.5	240.2	254.8	260.3	243.4	265.2	220.4	236	254.7	239.9	231.5	240.2	254.8	260.3	243.4	265.2	220.4	236	254.7	High	High	High	High
-8.06444e+18	FALSE	High	IsMasterProtein	TGGT1_311480-t26_1-p1	transcript=TGGT1_311480-t26_1 | gene=TGGT1_311480 | organism=Toxoplasma_gondii_GT1 | gene_product=hypothetical protein | transcript_product=hypothetical protein | location=TGGT1_chrXI:2071805-2077652(-) | protein_length=386 | sequence_SO=chromosome | SO=protein_coding_gene | is_pseudo=false	0	104.612	39	13	42	13	386	42.4	5.02	163.53	13	0.965	1.021	1.052	1.038	1.043	1.071	1.033	1.016	1.01	10503.5	10135.7	10720.8	11048.3	10898.3	10958.9	11245	10845.9	10673.8	10612.3	10503.5	10135.7	10720.8	11048.3	10898.3	10958.9	11245	10845.9	10673.8	10612.3	High	High	High	High
-5.72551e+18	FALSE	High	IsMasterProtein	TGGT1_257340-t26_1-p1	transcript=TGGT1_257340-t26_1 | gene=TGGT1_257340 | organism=Toxoplasma_gondii_GT1 | gene_product=Ras family protein [Source:UniProtKB/TrEMBL;Acc:A0A125YZS8] | transcript_product=Ras family protein | location=TGGT1_chrVIIb:4052097-4056284(+) | protein_length=214 | sequence_SO=chromosome | SO=protein_coding_gene | is_pseudo=false	0	9.242	17	3	7	2	214	23.6	8.15	24.02	3	0.965	1.001	0.99	1.108	1.084	1.049	1.216	0.995	1.04	259.4	250.3	259.8	256.7	287.4	281.3	272.1	315.5	258	269.8	259.4	250.3	259.8	256.7	287.4	281.3	272.1	315.5	258	269.8	High	High	High	High
3.2192e+17	FALSE	High	IsMasterProtein	TGGT1_267050-t26_1-p1	transcript=TGGT1_267050-t26_1 | gene=TGGT1_267050 | organism=Toxoplasma_gondii_GT1 | gene_product=Hydrolase_4 domain-containing protein [Source:UniProtKB/TrEMBL;Acc:A0A125YZJ0] | transcript_product=hydrolase, alpha/beta fold family protein | location=TGGT1_chrIX:638270-640900(+) | protein_length=308 | sequence_SO=chromosome | SO=protein_coding_gene | is_pseudo=false	0	77.186	54	12	24	12	308	34	7.02	98.97	12	0.965	1.057	1.03	1.017	1.021	1.029	0.974	0.984	0.999	8205.8	7919.5	8670.5	8450.6	8344.9	8377.9	8443.1	7991.8	8075.8	8198.7	8205.8	7919.5	8670.5	8450.6	8344.9	8377.9	8443.1	7991.8	8075.8	8198.7	High	High	High	High
-4.86781e+18	FALSE	High	IsMasterProtein	TGGT1_313480-t26_1-p1	transcript=TGGT1_313480-t26_1 | gene=TGGT1_313480 | organism=Toxoplasma_gondii_GT1 | gene_product=hypothetical protein | transcript_product=hypothetical protein | location=TGGT1_chrXI:3385333-3400705(+) | protein_length=1381 | sequence_SO=chromosome | SO=protein_coding_gene | is_pseudo=false	0.001	5.587	3	3	3	3	1381	152.5	5.62	4.32	3	0.965	0.93	0.956	1.029	1.008	0.979	0.913	0.972	0.944	285.9	276	266.1	273.4	294.3	288.3	279.8	261.1	277.8	269.9	285.9	276	266.1	273.4	294.3	288.3	279.8	261.1	277.8	269.9	High	High	High	High
9.21307e+18	FALSE	High	IsMasterProtein	TGGT1_221390-t26_1-p1	transcript=TGGT1_221390-t26_1 | gene=TGGT1_221390 | organism=Toxoplasma_gondii_GT1 | gene_product=hypothetical protein | transcript_product=hypothetical protein | location=TGGT1_chrII:286177-292066(-) | protein_length=875 | sequence_SO=chromosome | SO=protein_coding_gene | is_pseudo=false	0	16.387	5	4	4	4	875	96.4	5.25	15.68	4	0.965	0.969	1.049	1.082	1.016	1.032	1.039	0.924	0.892	1530.1	1477.2	1483.4	1605.5	1655.9	1554.4	1579.3	1589.3	1413.9	1365.3	1530.1	1477.2	1483.4	1605.5	1655.9	1554.4	1579.3	1589.3	1413.9	1365.3	High	High	High	High
-4.76797e+18	FALSE	High	IsMasterProtein	TGGT1_293060-t26_1-p1	transcript=TGGT1_293060-t26_1 | gene=TGGT1_293060 | organism=Toxoplasma_gondii_GT1 | gene_product=B30.2/SPRY domain-containing protein [Source:UniProtKB/TrEMBL;Acc:A0A125YSA4] | transcript_product=SPRY domain-containing protein | location=TGGT1_chrIa:99024-107884(+) | protein_length=740 | sequence_SO=chromosome | SO=protein_coding_gene | is_pseudo=false	0	14.06	5	3	5	3	740	80.2	5.53	17.74	3	0.966	0.995	1.024	1.049	1.009	1.002	0.956	0.96	1.012	806.9	779.1	802.5	826.6	846.5	814.4	808.7	771.3	774.8	816.4	806.9	779.1	802.5	826.6	846.5	814.4	808.7	771.3	774.8	816.4	High	High	High	High
-1.32394e+18	FALSE	High	IsMasterProtein	TGGT1_261750-t26_1-p1	transcript=TGGT1_261750-t26_1 | gene=TGGT1_261750 | organism=Toxoplasma_gondii_GT1 | gene_product=Rhoptry neck protein RON10 [Source:UniProtKB/TrEMBL;Acc:A0A125YWP1] | transcript_product=rhoptry neck protein RON10 | location=TGGT1_chrVIIb:1521076-1525837(-) | protein_length=835 | sequence_SO=chromosome | SO=protein_coding_gene | is_pseudo=false	0	137.643	29	19	45	19	835	91.3	5.06	169.94	19	0.966	0.977	0.962	0.968	0.985	0.976	0.961	0.962	0.95	13864.4	13387.8	13549.9	13343.8	13415.3	13653.2	13538.4	13323.7	13342.9	13166	13864.4	13387.8	13549.9	13343.8	13415.3	13653.2	13538.4	13323.7	13342.9	13166	High	High	High	High
-8.906e+18	FALSE	High	IsMasterProtein	TGGT1_247730-t26_1-p1	transcript=TGGT1_247730-t26_1 | gene=TGGT1_247730 | organism=Toxoplasma_gondii_GT1 | gene_product=AP2 domain transcription factor AP2XII-5 [Source:UniProtKB/TrEMBL;Acc:S7V143] | transcript_product=AP2 domain transcription factor AP2XII-5 | location=TGGT1_chrXII:3468697-3473688(-) | protein_length=1502 | sequence_SO=chromosome | SO=protein_coding_gene | is_pseudo=false	0	10.152	2	1	1	1	1502	161.6	5.85	4.05	1	0.966	0.937	1.045	1.06	0.862	0.905	1.101	1.103	0.978	13	12.6	12.2	13.6	13.8	11.2	11.8	14.3	14.3	12.7	13	12.6	12.2	13.6	13.8	11.2	11.8	14.3	14.3	12.7	High	High	High	High
-1.05859e+17	FALSE	High	IsMasterProtein	TGGT1_319350-t26_1-p1	transcript=TGGT1_319350-t26_1 | gene=TGGT1_319350 | organism=Toxoplasma_gondii_GT1 | gene_product=SAG domain-containing protein [Source:UniProtKB/TrEMBL;Acc:A0A125YRK7] | transcript_product=SAG-related sequence SRS17B | location=TGGT1_chrIV:957373-958987(+) | protein_length=379 | sequence_SO=chromosome | SO=protein_coding_gene | is_pseudo=false	0	115.885	49	15	40	15	379	39.4	5.02	164.95	15	0.966	1.048	1.031	0.998	1.033	1.065	0.945	0.971	0.967	10582.1	10219.6	11087.6	10915.1	10555.9	10933.3	11274.2	10000.8	10277.2	10235.6	10582.1	10219.6	11087.6	10915.1	10555.9	10933.3	11274.2	10000.8	10277.2	10235.6	High	High	High	High
-7.54574e+18	FALSE	High	IsMasterProtein	TGGT1_314790-t26_1-p1	transcript=TGGT1_314790-t26_1 | gene=TGGT1_314790 | organism=Toxoplasma_gondii_GT1 | gene_product=Small nuclear ribonucleoprotein G [Source:UniProtKB/TrEMBL;Acc:A0A125YU69] | transcript_product=putative small nuclear ribonucleoprotein G | location=TGGT1_chrXI:4249536-4250830(-) | protein_length=93 | sequence_SO=chromosome | SO=protein_coding_gene | is_pseudo=false	0	41.52	53	4	14	4	93	10.2	8.87	55.28	4	0.966	0.972	0.992	1.009	1.011	1.053	0.987	0.987	1.008	3298.4	3185.5	3206.3	3273	3328.4	3334	3473	3254.3	3255.3	3323.5	3298.4	3185.5	3206.3	3273	3328.4	3334	3473	3254.3	3255.3	3323.5	High	High	High	High
6.82016e+17	FALSE	High	IsMasterProtein	TGGT1_253070-t26_1-p1	transcript=TGGT1_253070-t26_1 | gene=TGGT1_253070 | organism=Toxoplasma_gondii_GT1 | gene_product=Hydrolase, TatD family protein [Source:UniProtKB/TrEMBL;Acc:S7VVW3] | transcript_product=hydrolase, TatD family protein | location=TGGT1_chrIII:697423-702989(+) | protein_length=708 | sequence_SO=chromosome | SO=protein_coding_gene | is_pseudo=false	0	29.254	9	7	8	7	708	78.3	9.69	26.55	7	0.966	1.001	0.988	0.962	1.006	0.981	0.822	0.967	0.966	2802.3	2706.5	2806.3	2768.5	2696.9	2819.5	2749.9	2303	2710.8	2708.3	2802.3	2706.5	2806.3	2768.5	2696.9	2819.5	2749.9	2303	2710.8	2708.3	High	High	High	High
3.84098e+18	FALSE	High	IsMasterProtein	TGGT1_314260-t26_1-p1	transcript=TGGT1_314260-t26_1 | gene=TGGT1_314260 | organism=Toxoplasma_gondii_GT1 | gene_product=hypothetical protein | transcript_product=hypothetical protein | location=TGGT1_chrXI:3928370-3929011(+) | protein_length=213 | sequence_SO=chromosome | SO=protein_coding_gene | is_pseudo=false	0	41.36	28	4	16	4	213	23.8	10.01	59.61	4	0.966	1.064	1.052	1.015	1.066	1.057	1.011	1.057	0.355	4803.7	4639.8	5112.1	5055.2	4876.5	5121.3	5076.3	4854.9	5076.8	1707.5	4803.7	4639.8	5112.1	5055.2	4876.5	5121.3	5076.3	4854.9	5076.8	1707.5	High	High	High	High
3.65856e+18	FALSE	High	IsMasterProtein	TGGT1_316240-t26_1-p1	transcript=TGGT1_316240-t26_1 | gene=TGGT1_316240 | organism=Toxoplasma_gondii_GT1 | gene_product=hypothetical protein | transcript_product=hypothetical protein | location=TGGT1_chrXI:5150102-5152171(+) | protein_length=689 | sequence_SO=chromosome | SO=protein_coding_gene | is_pseudo=false	0	27.604	13	6	10	6	689	74.8	5.34	35.22	6	0.966	0.964	0.987	1.029	1.02	1.05	1.034	0.972	0.978	1491	1440.5	1438	1471.1	1534.8	1521.3	1565.4	1541.7	1449.8	1458.2	1491	1440.5	1438	1471.1	1534.8	1521.3	1565.4	1541.7	1449.8	1458.2	High	High	High	High
1.92695e+18	FALSE	High	IsMasterProtein	TGGT1_216000-t26_1-p1	transcript=TGGT1_216000-t26_1 | gene=TGGT1_216000 | organism=Toxoplasma_gondii_GT1 | gene_product=Alveolin domain containing intermediate filament IMC3 [Source:UniProtKB/TrEMBL;Acc:A0A125YIN0] | transcript_product=alveolin domain containing intermediate filament IMC3 | location=TGGT1_chrXI:6395592-6397208(+) | protein_length=538 | sequence_SO=chromosome | SO=protein_coding_gene | is_pseudo=false	0	28.519	9	4	9	4	538	58	5.34	42.15	4	0.966	0.997	1.051	1.031	0.969	1.027	0.934	0.909	0.952	1606.8	1552.5	1601.9	1688.4	1656.1	1556.3	1650.5	1500.6	1460.7	1529	1606.8	1552.5	1601.9	1688.4	1656.1	1556.3	1650.5	1500.6	1460.7	1529	High	High	High	High
-7.95467e+18	FALSE	Medium	IsMasterProtein	TGGT1_243310-t26_1-p1	transcript=TGGT1_243310-t26_1 | gene=TGGT1_243310 | organism=Toxoplasma_gondii_GT1 | gene_product=hypothetical protein | transcript_product=hypothetical protein | location=TGGT1_chrVI:2455507-2460208(+) | protein_length=1266 | sequence_SO=chromosome | SO=protein_coding_gene | is_pseudo=false	0.033	1.404	0	1	2	1	1266	132.4	8.54	4.6	1	0.966	0.998	1.027	1.116	0.986	0.99	1.046	1.016	1.053	100.1	96.7	100	102.8	111.7	98.7	99.1	104.8	101.7	105.4	100.1	96.7	100	102.8	111.7	98.7	99.1	104.8	101.7	105.4	High	High	High	High
8.37476e+18	FALSE	High	IsMasterProtein	TGGT1_315320-t26_1-p1	transcript=TGGT1_315320-t26_1 | gene=TGGT1_315320 | organism=Toxoplasma_gondii_GT1 | gene_product=SAG-related sequence SRS52A [Source:UniProtKB/TrEMBL;Acc:S7UMK1] | transcript_product=SAG-related sequence SRS52A | location=TGGT1_chrXI:4594837-4596241(+) | protein_length=329 | sequence_SO=chromosome | SO=protein_coding_gene | is_pseudo=false	0	206.144	71	16	150	16	329	34.2	5.52	693.6	16	0.966	1.055	1.044	1.008	1.032	1.045	0.954	0.975	0.956	47387.4	45792.6	50016.9	49485.1	47743.3	48898.6	49507.1	45192.1	46212.2	45315.3	47387.4	45792.6	50016.9	49485.1	47743.3	48898.6	49507.1	45192.1	46212.2	45315.3	High	High	High	High
6.68711e+18	FALSE	High	IsMasterProtein	TGGT1_294980-t26_1-p1	transcript=TGGT1_294980-t26_1 | gene=TGGT1_294980 | organism=Toxoplasma_gondii_GT1 | gene_product=hypothetical protein | transcript_product=hypothetical protein | location=TGGT1_chrIa:1287876-1289315(+) | protein_length=270 | sequence_SO=chromosome | SO=protein_coding_gene | is_pseudo=false	0	11.995	14	3	4	3	270	29.2	11.37	13.72	3	0.966	0.959	1.047	1.019	1.053	1.042	0.86	1.002	1.007	770.1	744.2	738.9	806.3	784.8	810.6	802.9	662	771.8	775.3	770.1	744.2	738.9	806.3	784.8	810.6	802.9	662	771.8	775.3	High	High	High	High
2.60087e+18	FALSE	High	IsMasterProtein	TGGT1_283740-t26_1-p1	transcript=TGGT1_283740-t26_1 | gene=TGGT1_283740 | organism=Toxoplasma_gondii_GT1 | gene_product=RRM domain-containing protein [Source:UniProtKB/TrEMBL;Acc:S7W2V3] | transcript_product=RNA recognition motif-containing protein | location=TGGT1_chrV:2834742-2838439(+) | protein_length=615 | sequence_SO=chromosome | SO=protein_coding_gene | is_pseudo=false	0.003	3.439	1	1	2	1	615	64.5	9.58	5.61	1	0.966	1.027	0.991	0.994	0.958	1.059	1.04	0.961	1.127	254.8	246.2	261.6	252.4	253.4	244	269.9	265	245	287.2	254.8	246.2	261.6	252.4	253.4	244	269.9	265	245	287.2	High	High	High	High
-7.80087e+18	FALSE	High	IsMasterProtein	TGGT1_236870-t26_1-p1	transcript=TGGT1_236870-t26_1 | gene=TGGT1_236870 | organism=Toxoplasma_gondii_GT1 | gene_product=hypothetical protein | transcript_product=hypothetical protein | location=TGGT1_chrX:5454717-5455361(-) | protein_length=214 | sequence_SO=chromosome | SO=protein_coding_gene | is_pseudo=false	0.004	2.721	4	1	1	1	214	23.8	7.68	2.55	1	0.966	1.099	1.051	1.027	1.031	0.978	0.782	1.029	1.071	803.5	776.6	883	844.7	824.8	828.6	785.6	628	826.6	860.8	803.5	776.6	883	844.7	824.8	828.6	785.6	628	826.6	860.8	High	High	High	High
1.60855e+18	FALSE	High	IsMasterProtein	TGGT1_247580-t26_1-p1	transcript=TGGT1_247580-t26_1 | gene=TGGT1_247580 | organism=Toxoplasma_gondii_GT1 | gene_product=Glutaredoxin domain-containing protein [Source:UniProtKB/TrEMBL;Acc:S7WH76] | transcript_product=glutaredoxin domain-containing protein | location=TGGT1_chrXII:3356004-3357311(-) | protein_length=312 | sequence_SO=chromosome | SO=protein_coding_gene | is_pseudo=false	0.001	5.49	4	1	1	1	312	34.3	7.53	3.72	1	0.966	0.997	1.05	1.066	1.055	1.074	0.991	0.986	1.014	237.5	229.5	236.8	249.5	253.2	250.6	255	235.4	234.1	240.9	237.5	229.5	236.8	249.5	253.2	250.6	255	235.4	234.1	240.9	High	High	High	High
1.98964e+17	FALSE	High	IsMasterProtein	TGGT1_273070-t26_1-p1	transcript=TGGT1_273070-t26_1 | gene=TGGT1_273070 | organism=Toxoplasma_gondii_GT1 | gene_product=Arf-GAP domain-containing protein [Source:UniProtKB/TrEMBL;Acc:S7V3B8] | transcript_product=putative GTPase activating protein for adp ribosylation factor | location=TGGT1_chrVIII:3675277-3682823(+) | protein_length=501 | sequence_SO=chromosome | SO=protein_coding_gene | is_pseudo=false	0	7.966	3	1	1	1	501	51.9	8.5	5.82	1	0.966	1.123	1.089	1.123	1.225	1.137	1.089	1.301	1.314	205.1	198.2	230.3	223.3	230.4	251.3	233.1	223.3	266.9	269.6	205.1	198.2	230.3	223.3	230.4	251.3	233.1	223.3	266.9	269.6	High	High	High	High
2.2371e+18	FALSE	High	IsMasterProtein	TGGT1_211670-t26_1-p1	transcript=TGGT1_211670-t26_1 | gene=TGGT1_211670 | organism=Toxoplasma_gondii_GT1 | gene_product=S1 RNA binding domain-containing protein [Source:UniProtKB/TrEMBL;Acc:A0A125YJ43] | transcript_product=S1 RNA binding domain-containing protein | location=TGGT1_chrIV:1560254-1562332(-) | protein_length=378 | sequence_SO=chromosome | SO=protein_coding_gene | is_pseudo=false	0	8.976	4	1	1	1	378	42.2	9.41	5.55	1	0.966	1.063	1.07	1.101	1.219	1.15	1.129	1.116	0.577	115	111.1	122.2	123	126.6	140.2	132.2	129.8	128.3	66.3	115	111.1	122.2	123	126.6	140.2	132.2	129.8	128.3	66.3	High	High	High	High
-2.56058e+18	FALSE	High	IsMasterProtein	TGGT1_233080-t26_1-p1	transcript=TGGT1_233080-t26_1 | gene=TGGT1_233080 | organism=Toxoplasma_gondii_GT1 | gene_product=G-patch domain-containing protein [Source:UniProtKB/TrEMBL;Acc:S7WC26] | transcript_product=G-patch domain-containing protein | location=TGGT1_chrVIII:2391965-2397097(+) | protein_length=1496 | sequence_SO=chromosome | SO=protein_coding_gene | is_pseudo=false	0	12.436	2	1	1	1	1496	166.6	7.27	7.59	1	0.966	0.852	0.815	0.896	0.852	0.801	1.079	0.769	0.977	21.3	20.6	18.2	17.4	19.1	18.2	17.1	23	16.4	20.8	21.3	20.6	18.2	17.4	19.1	18.2	17.1	23	16.4	20.8	High	High	High	High
6.55351e+18	FALSE	High	IsMasterProtein	TGGT1_224910-t26_1-p1	transcript=TGGT1_224910-t26_1 | gene=TGGT1_224910 | organism=Toxoplasma_gondii_GT1 | gene_product=Divalent cation tolerance protein, CutA1 family protein [Source:UniProtKB/TrEMBL;Acc:S7WC96] | transcript_product=divalent cation tolerance protein, CutA1 family protein | location=TGGT1_chrX:2603114-2606370(+) | protein_length=255 | sequence_SO=chromosome | SO=protein_coding_gene | is_pseudo=false	0	25.808	20	5	11	5	255	27.6	8.44	47.31	5	0.966	0.974	1.059	1.024	1.064	1.049	0.783	1.04	1.041	5112.9	4941.5	4982.5	5414.8	5238	5437.6	5362.4	4002.7	5317.4	5322.5	5112.9	4941.5	4982.5	5414.8	5238	5437.6	5362.4	4002.7	5317.4	5322.5	High	High	High	High
-6.07643e+18	FALSE	High	IsMasterProtein	TGGT1_268790-t26_1-p1	transcript=TGGT1_268790-t26_1 | gene=TGGT1_268790 | organism=Toxoplasma_gondii_GT1 | gene_product=hypothetical protein | transcript_product=hypothetical protein | location=TGGT1_chrVIII:6289367-6290125(+) | protein_length=252 | sequence_SO=chromosome | SO=protein_coding_gene | is_pseudo=false	0	53.967	43	9	21	9	252	27.3	5.03	85.27	9	0.966	0.951	1.018	1.019	0.987	1.011	0.769	0.935	0.983	5556.2	5369.9	5284	5655.6	5662.9	5486.1	5615.9	4275.3	5196.5	5462.5	5556.2	5369.9	5284	5655.6	5662.9	5486.1	5615.9	4275.3	5196.5	5462.5	High	High	High	High
6.78756e+18	FALSE	High	IsMasterProtein	TGGT1_307810-t26_1-p1	transcript=TGGT1_307810-t26_1 | gene=TGGT1_307810 | organism=Toxoplasma_gondii_GT1 | gene_product=hypothetical protein | transcript_product=hypothetical protein | location=TGGT1_chrXII:366832-371762(-) | protein_length=433 | sequence_SO=chromosome | SO=protein_coding_gene | is_pseudo=false	0	93.149	32	14	32	14	433	45.2	9.52	124.27	14	0.967	1.007	1.013	1.035	1.021	1.045	0.966	0.956	0.971	8538.6	8255.2	8598.4	8652.7	8836.8	8713.9	8919.4	8246.8	8166.7	8295.2	8538.6	8255.2	8598.4	8652.7	8836.8	8713.9	8919.4	8246.8	8166.7	8295.2	High	High	High	High
7.5433e+17	FALSE	High	IsMasterProtein	TGGT1_319090-t26_1-p1	transcript=TGGT1_319090-t26_1 | gene=TGGT1_319090 | organism=Toxoplasma_gondii_GT1 | gene_product=IgA-specific serine endopeptidase [Source:UniProtKB/TrEMBL;Acc:S7VYV1] | transcript_product=IgA-specific serine endopeptidase | location=TGGT1_chrIV:1027216-1030871(+) | protein_length=604 | sequence_SO=chromosome | SO=protein_coding_gene | is_pseudo=false	0	14.205	6	2	5	2	604	62.9	4.16	24.14	2	0.967	0.849	1.062	1.124	0.965	0.989	0.787	0.875	0.948	253.9	245.5	215.6	269.6	285.3	245	251.1	199.9	222.1	240.7	253.9	245.5	215.6	269.6	285.3	245	251.1	199.9	222.1	240.7	High	High	High	High
6.73769e+18	FALSE	High	IsMasterProtein	TGGT1_204060-t26_1-p1	transcript=TGGT1_204060-t26_1 | gene=TGGT1_204060 | organism=Toxoplasma_gondii_GT1 | gene_product=t-SNARE coiled-coil homology domain-containing protein [Source:UniProtKB/TrEMBL;Acc:S7W3C9] | transcript_product=SNARE domain-containing protein | location=TGGT1_chrVIIa:1922878-1928958(+) | protein_length=494 | sequence_SO=chromosome | SO=protein_coding_gene | is_pseudo=false	0	39.826	18	7	13	7	494	53.5	6.49	48.09	7	0.967	1.012	1.034	1.077	1.046	1.064	1.015	1	1.02	2736.9	2646.5	2769	2829.1	2948.3	2864.1	2910.9	2777.7	2736.3	2791.5	2736.9	2646.5	2769	2829.1	2948.3	2864.1	2910.9	2777.7	2736.3	2791.5	High	High	High	High
-2.39135e+18	FALSE	High	IsMasterProtein	TGGT1_225890-t26_1-p1	transcript=TGGT1_225890-t26_1 | gene=TGGT1_225890 | organism=Toxoplasma_gondii_GT1 | gene_product=hypothetical protein | transcript_product=hypothetical protein | location=TGGT1_chrX:1864237-1871724(-) | protein_length=2111 | sequence_SO=chromosome | SO=protein_coding_gene | is_pseudo=false	0	27.643	3	5	7	5	2111	222.9	9.67	21.87	5	0.967	0.946	0.973	0.941	0.967	0.975	0.959	0.946	0.558	2100.5	2031.2	1987.6	2044	1977.2	2031.6	2048.1	2013.7	1987	1171.9	2100.5	2031.2	1987.6	2044	1977.2	2031.6	2048.1	2013.7	1987	1171.9	High	High	High	High
3.47712e+18	FALSE	High	IsMasterProtein	TGGT1_218240-t26_1-p1	transcript=TGGT1_218240-t26_1 | gene=TGGT1_218240 | organism=Toxoplasma_gondii_GT1 | gene_product=hypothetical protein | transcript_product=hypothetical protein | location=TGGT1_chrXII:1592419-1596488(-) | protein_length=1249 | sequence_SO=chromosome | SO=protein_coding_gene | is_pseudo=false	0	177.72	25	24	72	24	1249	132.5	5.21	268.67	24	0.967	1.015	1.037	1.034	1.041	1.055	0.863	0.99	1.017	25541.3	24699.4	25913.8	26486.6	26408.7	26581.1	26938.6	22032.1	25298.4	25967.3	25541.3	24699.4	25913.8	26486.6	26408.7	26581.1	26938.6	22032.1	25298.4	25967.3	High	High	High	High
6.70216e+18	FALSE	High	IsMasterProtein	TGGT1_312640-t26_1-p1	transcript=TGGT1_312640-t26_1 | gene=TGGT1_312640 | organism=Toxoplasma_gondii_GT1 | gene_product=PUB domain-containing protein [Source:UniProtKB/TrEMBL;Acc:S7UTP0] | transcript_product=hypothetical protein | location=TGGT1_chrXI:2830072-2831896(+) | protein_length=290 | sequence_SO=chromosome | SO=protein_coding_gene | is_pseudo=false	0	17.149	12	3	7	3	290	31.6	9.86	25.26	3	0.967	1.007	1.008	1.074	1.042	1.041	1.053	1.091	1.101	1107.7	1071.2	1115.4	1116.7	1190.1	1154.1	1153.4	1166.4	1208.9	1219.7	1107.7	1071.2	1115.4	1116.7	1190.1	1154.1	1153.4	1166.4	1208.9	1219.7	High	High	High	High
9.04082e+18	FALSE	High	IsMasterProtein	TGGT1_216650-t26_1-p1	transcript=TGGT1_216650-t26_1 | gene=TGGT1_216650 | organism=Toxoplasma_gondii_GT1 | gene_product=S15 sporozoite-expressed protein [Source:UniProtKB/TrEMBL;Acc:S7UKW3] | transcript_product=S15 sporozoite-expressed protein | location=TGGT1_chrXI:5902644-5904672(-) | protein_length=400 | sequence_SO=chromosome | SO=protein_coding_gene | is_pseudo=false	0	127.575	46	18	126	18	400	45.1	7.28	398.88	18	0.967	1.002	0.976	0.953	0.997	1.019	0.947	0.951	0.932	36951.7	35735.6	37041.4	36055.2	35215.7	36824.8	37654.7	34975.7	35137.4	34451	36951.7	35735.6	37041.4	36055.2	35215.7	36824.8	37654.7	34975.7	35137.4	34451	High	High	High	High
-9.09758e+18	FALSE	High	IsMasterProtein	TGGT1_202950-t26_1-p1	transcript=TGGT1_202950-t26_1 | gene=TGGT1_202950 | organism=Toxoplasma_gondii_GT1 | gene_product=hypothetical protein | transcript_product=hypothetical protein | location=TGGT1_chrVIIa:2821568-2833732(+) | protein_length=1414 | sequence_SO=chromosome | SO=protein_coding_gene | is_pseudo=false	0.001	4.295	1	1	1	1	1414	151.8	5.57	4.34	1	0.967	0.961	0.948	1.033	1.011	1.036	1.151	0.881	1.021	239.8	231.9	230.4	227.2	247.6	242.4	248.4	276.1	211.2	244.8	239.8	231.9	230.4	227.2	247.6	242.4	248.4	276.1	211.2	244.8	High	High	High	High
9.28455e+17	FALSE	High	IsMasterProtein	TGGT1_254410-t26_1-p1	transcript=TGGT1_254410-t26_1 | gene=TGGT1_254410 | organism=Toxoplasma_gondii_GT1 | gene_product=Protein phosphatase [Source:UniProtKB/TrEMBL;Acc:S7W1Z8] | transcript_product=putative protein phosphatase 2C | location=TGGT1_chrIII:1695545-1701599(-) | protein_length=626 | sequence_SO=chromosome | SO=protein_coding_gene | is_pseudo=false	0	9.809	4	3	4	3	626	67.4	8.51	12.79	3	0.967	0.979	1.023	1.08	1.088	1.037	1.179	1.132	1.176	1032.2	998.3	1010.8	1055.9	1114.3	1123.1	1070	1217.3	1168.6	1213.4	1032.2	998.3	1010.8	1055.9	1114.3	1123.1	1070	1217.3	1168.6	1213.4	High	High	High	High
3.98369e+18	FALSE	High	IsMasterProtein	TGGT1_273930-t26_1-p1	transcript=TGGT1_273930-t26_1 | gene=TGGT1_273930 | organism=Toxoplasma_gondii_GT1 | gene_product=SWIB domain-containing protein [Source:UniProtKB/TrEMBL;Acc:S7V4C1] | transcript_product=DNA topoisomerase domain-containing protein | location=TGGT1_chrVIII:3163479-3165871(+) | protein_length=254 | sequence_SO=chromosome | SO=protein_coding_gene | is_pseudo=false	0	44.944	23	9	30	9	254	28	10.3	80.22	9	0.967	1.03	1.026	0.991	1.014	1	0.782	0.956	0.979	7364.5	7122.7	7585.8	7558	7296.4	7469.4	7366.6	5756.6	7037.9	7208.4	7364.5	7122.7	7585.8	7558	7296.4	7469.4	7366.6	5756.6	7037.9	7208.4	High	High	High	High
-3.78052e+18	FALSE	High	IsMasterProtein	TGGT1_245730-t26_1-p1	transcript=TGGT1_245730-t26_1 | gene=TGGT1_245730 | organism=Toxoplasma_gondii_GT1 | gene_product=PIPK domain-containing protein [Source:UniProtKB/TrEMBL;Acc:S7V190] | transcript_product=phosphatidylinositol-4-phosphate 5-Kinase | location=TGGT1_chrXII:2437394-2453879(+) | protein_length=2139 | sequence_SO=chromosome | SO=protein_coding_gene | is_pseudo=false	0	13.48	2	3	3	3	2139	231.9	7.66	6.26	3	0.967	0.97	0.994	1.113	1.001	1.007	1.032	0.948	0.9	494.1	477.9	479.4	491.3	549.9	494.7	497.7	509.7	468.2	444.5	494.1	477.9	479.4	491.3	549.9	494.7	497.7	509.7	468.2	444.5	High	High	High	High
-2.38582e+18	FALSE	High	IsMasterProtein	TGGT1_214990-t26_1-p1	transcript=TGGT1_214990-t26_1 | gene=TGGT1_214990 | organism=Toxoplasma_gondii_GT1 | gene_product=hypothetical protein | transcript_product=hypothetical protein | location=TGGT1_chrX:6550174-6562207(-) | protein_length=3441 | sequence_SO=chromosome | SO=protein_coding_gene | is_pseudo=false	0	22.267	2	6	6	6	3441	356	7.14	15.83	6	0.967	1.053	1.01	1.002	0.951	0.957	0.984	0.995	0.986	835.2	807.8	879.1	843.5	836.5	794.3	799.7	822.1	831.4	823.8	835.2	807.8	879.1	843.5	836.5	794.3	799.7	822.1	831.4	823.8	High	High	High	High
6.04304e+18	FALSE	High	IsMasterProtein	TGGT1_220900-t26_1-p1	transcript=TGGT1_220900-t26_1 | gene=TGGT1_220900 | organism=Toxoplasma_gondii_GT1 | gene_product=hypothetical protein | transcript_product=hypothetical protein | location=TGGT1_chrII:27409-29529(+) | protein_length=706 | sequence_SO=chromosome | SO=protein_coding_gene | is_pseudo=false	0	141.694	30	20	40	20	706	78.1	6.62	174.66	20	0.967	1.021	1.047	1.045	1.062	1.087	1.326	1.043	1.037	8197	7928.5	8366.1	8584.5	8562.1	8708.6	8914.1	10866.9	8552.5	8499.4	8197	7928.5	8366.1	8584.5	8562.1	8708.6	8914.1	10866.9	8552.5	8499.4	High	High	High	High
8.21223e+18	FALSE	High	IsMasterProtein	TGGT1_306270-t26_1-p1	transcript=TGGT1_306270-t26_1 | gene=TGGT1_306270 | organism=Toxoplasma_gondii_GT1 | gene_product=hypothetical protein | transcript_product=hypothetical protein | location=TGGT1_chrIX:5685303-5685746(-) | protein_length=147 | sequence_SO=chromosome | SO=protein_coding_gene | is_pseudo=false	0	11.235	21	3	4	3	147	16.1	7.43	12.28	3	0.967	0.991	1.015	1.026	1.034	1.039	0.94	0.984	0.972	1806.7	1747.5	1791.1	1833.4	1854.4	1867.3	1876.9	1698.3	1778	1755.8	1806.7	1747.5	1791.1	1833.4	1854.4	1867.3	1876.9	1698.3	1778	1755.8	High	High	High	High
4.73003e+18	FALSE	High	IsMasterProtein	TGGT1_314070-t26_1-p1	transcript=TGGT1_314070-t26_1 | gene=TGGT1_314070 | organism=Toxoplasma_gondii_GT1 | gene_product=hypothetical protein | transcript_product=hypothetical protein | location=TGGT1_chrXI:3869843-3870803(-) | protein_length=205 | sequence_SO=chromosome | SO=protein_coding_gene | is_pseudo=false	0	31.529	38	6	17	6	205	22.8	5.31	68.85	6	0.967	1.073	1.071	1.043	1.078	1.067	1.049	1.062	1.11	5619.7	5436.3	6029.4	6017.5	5858.8	6059.8	5997.5	5893.4	5970.3	6239.9	5619.7	5436.3	6029.4	6017.5	5858.8	6059.8	5997.5	5893.4	5970.3	6239.9	High	High	High	High
-8.44363e+17	FALSE	High	IsMasterProtein	TGGT1_216900-t26_1-p1	transcript=TGGT1_216900-t26_1 | gene=TGGT1_216900 | organism=Toxoplasma_gondii_GT1 | gene_product=Anamorsin homolog [Source:UniProtKB/TrEMBL;Acc:S7ULY0] | transcript_product=cytokine induced apoptosis inhibitor 1 family protein | location=TGGT1_chrXI:5717643-5721591(-) | protein_length=443 | sequence_SO=chromosome | SO=protein_coding_gene | is_pseudo=false	0	80.136	38	14	26	14	443	47.5	6.57	99.54	14	0.967	0.985	0.995	0.992	0.977	1.003	0.957	0.952	0.962	7056.7	6826.5	6953.7	7022.3	6999.9	6893.5	7079.9	6754.8	6715.8	6790.6	7056.7	6826.5	6953.7	7022.3	6999.9	6893.5	7079.9	6754.8	6715.8	6790.6	High	High	High	High
4.75572e+18	FALSE	High	IsMasterProtein	TGGT1_216220-t26_1-p1	transcript=TGGT1_216220-t26_1 | gene=TGGT1_216220 | organism=Toxoplasma_gondii_GT1 | gene_product=AP2/ERF domain-containing protein [Source:UniProtKB/TrEMBL;Acc:S7ULU5] | transcript_product=AP2 domain transcription factor AP2XI-5 | location=TGGT1_chrXI:6230908-6234153(-) | protein_length=868 | sequence_SO=chromosome | SO=protein_coding_gene | is_pseudo=false	0	30.713	9	7	8	7	868	89.4	5.64	23.82	7	0.968	0.957	0.994	1	0.987	1.004	1	1.002	0.975	2190.5	2119.4	2095.7	2176.3	2189.6	2161.6	2198.8	2191	2194.6	2135	2190.5	2119.4	2095.7	2176.3	2189.6	2161.6	2198.8	2191	2194.6	2135	High	High	High	High
-4.70026e+18	FALSE	High	IsMasterProtein	TGGT1_310790-t26_1-p1	transcript=TGGT1_310790-t26_1 | gene=TGGT1_310790 | organism=Toxoplasma_gondii_GT1 | gene_product=hypothetical protein | transcript_product=hypothetical protein | location=TGGT1_chrXI:1556574-1558606(+) | protein_length=219 | sequence_SO=chromosome | SO=protein_coding_gene | is_pseudo=false	0	132.754	55	13	78	13	219	24.7	4.92	280.69	13	0.968	1.034	1.053	1.019	1.055	1.057	0.782	1.017	1.017	22914.3	22171.1	23699.1	24127.7	23339.3	24169.5	24225.9	17924.1	23301.7	23312.1	22914.3	22171.1	23699.1	24127.7	23339.3	24169.5	24225.9	17924.1	23301.7	23312.1	High	High	High	High
3.95205e+18	FALSE	High	IsMasterProtein	TGGT1_230940-t26_1-p1	transcript=TGGT1_230940-t26_1 | gene=TGGT1_230940 | organism=Toxoplasma_gondii_GT1 | gene_product=hypothetical protein | transcript_product=hypothetical protein | location=TGGT1_chrVIII:1112065-1119747(+) | protein_length=1523 | sequence_SO=chromosome | SO=protein_coding_gene | is_pseudo=false	0	364.052	37	45	156	45	1523	155.1	9.44	633.53	45	0.968	1.013	1.029	1.026	1.03	1.055	0.962	0.984	1.005	51905.2	50222.4	52561.4	53411.5	53229.6	53448.5	54753.3	49934.2	51079	52143.7	51905.2	50222.4	52561.4	53411.5	53229.6	53448.5	54753.3	49934.2	51079	52143.7	High	High	High	High
-5.00219e+18	FALSE	High	IsMasterProtein	TGGT1_203540-t26_1-p1	transcript=TGGT1_203540-t26_1 | gene=TGGT1_203540 | organism=Toxoplasma_gondii_GT1 | gene_product=Putative RNA binding protein [Source:UniProtKB/TrEMBL;Acc:S7UV06] | transcript_product=putative RNA binding protein | location=TGGT1_chrVIIa:2333721-2341250(-) | protein_length=1127 | sequence_SO=chromosome | SO=protein_coding_gene | is_pseudo=false	0.001	4.93	2	1	1	1	1127	118.6	6.51	4.67	1	0.968	0.915	1.009	1.108	1	0.99	1.084	0.928	0.947	193.6	187.3	177.1	195.3	214.6	193.6	191.7	209.9	179.7	183.3	193.6	187.3	177.1	195.3	214.6	193.6	191.7	209.9	179.7	183.3	High	High	High	High
7.17947e+18	FALSE	High	IsMasterProtein	TGGT1_257680-t26_1-p1	transcript=TGGT1_257680-t26_1 | gene=TGGT1_257680 | organism=Toxoplasma_gondii_GT1 | gene_product=EF-hand domain-containing protein [Source:UniProtKB/TrEMBL;Acc:A0A125YYD3] | transcript_product=myosin light chain MLC1 | location=TGGT1_chrVIIb:3843366-3845688(+) | protein_length=213 | sequence_SO=chromosome | SO=protein_coding_gene | is_pseudo=false	0	121.373	69	11	99	11	213	24.1	4.65	364.68	11	0.968	1.032	1.025	0.983	1.012	1.01	0.927	0.977	0.998	37444.5	36231.5	38659.1	38379	36818.4	37879.9	37807.9	34697.5	36568.6	37359.2	37444.5	36231.5	38659.1	38379	36818.4	37879.9	37807.9	34697.5	36568.6	37359.2	High	High	High	High
5.78423e+18	FALSE	High	IsMasterProtein	TGGT1_232660-t26_1-p1	transcript=TGGT1_232660-t26_1 | gene=TGGT1_232660 | organism=Toxoplasma_gondii_GT1 | gene_product=TPR_REGION domain-containing protein [Source:UniProtKB/TrEMBL;Acc:S7WBV4] | transcript_product=Hsp70 interacting protein HIP | location=TGGT1_chrVIII:2206171-2208838(-) | protein_length=425 | sequence_SO=chromosome | SO=protein_coding_gene | is_pseudo=false	0	109.886	35	19	74	19	425	45.2	5.31	235.64	19	0.968	1.021	1.021	0.996	1.026	1.044	0.92	0.985	0.961	26758.3	25892.2	27319	27321.2	26657.7	27452	27927.4	24614.2	26350.7	25714.2	26758.3	25892.2	27319	27321.2	26657.7	27452	27927.4	24614.2	26350.7	25714.2	High	High	High	High
6.92121e+18	FALSE	High	IsMasterProtein	TGGT1_301170-t26_1-p1	transcript=TGGT1_301170-t26_1 | gene=TGGT1_301170 | organism=Toxoplasma_gondii_GT1 | gene_product=SAG-related sequence SRS19D [Source:UniProtKB/TrEMBL;Acc:S7VVT3] | transcript_product=SAG-related sequence SRS19D | location=TGGT1_chrIV:2178932-2180101(-) | protein_length=389 | sequence_SO=chromosome | SO=protein_coding_gene | is_pseudo=false	0	45.601	21	8	18	3	389	40.4	7.11	63.52	8	0.968	1.035	1.03	1.023	1.055	1.033	0.931	0.973	0.983	1475.7	1428	1526.7	1519.6	1509.1	1556.3	1524	1374.5	1435.6	1451.1	1475.7	1428	1526.7	1519.6	1509.1	1556.3	1524	1374.5	1435.6	1451.1	High	High	High	High
2.13048e+18	FALSE	High	IsMasterProtein	TGGT1_321630-t26_1-p1	transcript=TGGT1_321630-t26_1 | gene=TGGT1_321630 | organism=Toxoplasma_gondii_GT1 | gene_product=RNA recognition motif-containing protein [Source:UniProtKB/TrEMBL;Acc:S7UIB8] | transcript_product=RNA recognition motif-containing protein | location=TGGT1_chrIb:1684762-1692366(-) | protein_length=400 | sequence_SO=chromosome | SO=protein_coding_gene | is_pseudo=false	0.004	2.644	2	1	1	1	400	45.7	9.17	2.56	1	0.968	0.867	0.934	0.997	0.983	0.946	1.176	0.908	0.906	240.7	233	208.7	224.8	239.8	236.6	227.6	283.1	218.5	218.1	240.7	233	208.7	224.8	239.8	236.6	227.6	283.1	218.5	218.1	High	High	High	High
7.80747e+18	FALSE	High	IsMasterProtein	TGGT1_306650-t26_1-p1	transcript=TGGT1_306650-t26_1 | gene=TGGT1_306650 | organism=Toxoplasma_gondii_GT1 | gene_product=hypothetical protein | transcript_product=hypothetical protein | location=TGGT1_chrIX:6020484-6022587(-) | protein_length=286 | sequence_SO=chromosome | SO=protein_coding_gene | is_pseudo=false	0	80.261	38	9	33	9	286	31.4	7.25	132.77	9	0.968	0.966	1.016	1.004	1.026	1.041	0.994	0.937	0.976	13924.9	13481.5	13449.7	14143.8	13981	14291.7	14489.1	13846.6	13046.5	13585.3	13924.9	13481.5	13449.7	14143.8	13981	14291.7	14489.1	13846.6	13046.5	13585.3	High	High	High	High
-2.45141e+18	FALSE	High	IsMasterProtein	TGGT1_244550-t26_1-p1	transcript=TGGT1_244550-t26_1 | gene=TGGT1_244550 | organism=Toxoplasma_gondii_GT1 | gene_product=hypothetical protein | transcript_product=hypothetical protein | location=TGGT1_chrVI:3267042-3268937(-) | protein_length=631 | sequence_SO=chromosome | SO=protein_coding_gene | is_pseudo=false	0	8.879	3	2	3	2	631	65.7	5.24	8.51	2	0.968	0.863	0.954	1.094	1.038	1.099	1.243	1.026	1.081	347.7	336.7	300	331.7	380.3	360.8	382.1	432.2	356.9	376	347.7	336.7	300	331.7	380.3	360.8	382.1	432.2	356.9	376	High	High	High	High
5.14249e+18	FALSE	High	IsMasterProtein	TGGT1_230880-t26_1-p1	transcript=TGGT1_230880-t26_1 | gene=TGGT1_230880 | organism=Toxoplasma_gondii_GT1 | gene_product=hypothetical protein | transcript_product=hypothetical protein | location=TGGT1_chrVIII:1069605-1072751(+) | protein_length=1048 | sequence_SO=chromosome | SO=protein_coding_gene | is_pseudo=false	0	13.418	3	3	3	3	1048	112.2	5	9.26	3	0.968	1.057	1.033	1.059	0.958	1.015	1.057	1.035	0.984	402.6	389.9	425.6	415.8	426.4	385.7	408.8	425.6	416.7	396.3	402.6	389.9	425.6	415.8	426.4	385.7	408.8	425.6	416.7	396.3	High	High	High	High
8.3061e+18	FALSE	High	IsMasterProtein	TGGT1_262390-t26_1-p1	transcript=TGGT1_262390-t26_1 | gene=TGGT1_262390 | organism=Toxoplasma_gondii_GT1 | gene_product=TLDc domain-containing protein [Source:UniProtKB/TrEMBL;Acc:S7UYB4] | transcript_product=TLD protein | location=TGGT1_chrVIIb:1280695-1289391(+) | protein_length=1392 | sequence_SO=chromosome | SO=protein_coding_gene | is_pseudo=false	0	12.766	2	2	2	2	1392	148	6.24	9.7	2	0.968	0.961	1.019	1.014	1.068	1.106	1.042	0.974	1.021	349.8	338.7	336.3	356.6	354.8	373.4	386.7	364.5	340.6	357.2	349.8	338.7	336.3	356.6	354.8	373.4	386.7	364.5	340.6	357.2	High	High	High	High
2.09082e+18	FALSE	High	IsMasterProtein	TGGT1_283850-t26_1-p1	transcript=TGGT1_283850-t26_1 | gene=TGGT1_283850 | organism=Toxoplasma_gondii_GT1 | gene_product=Peptidylprolyl isomerase [Source:UniProtKB/TrEMBL;Acc:S7UMS7] | transcript_product=peptidyl-prolyl cis-trans isomerase | location=TGGT1_chrV:2748825-2756049(-) | protein_length=503 | sequence_SO=chromosome | SO=protein_coding_gene | is_pseudo=false	0	192.255	49	29	144	28	503	55.5	5.59	514.07	29	0.968	1.012	1.022	1.01	1.023	1.033	0.971	0.967	0.967	46504	45038.4	47070.6	47536.8	46968.9	47551	48038.2	45161.7	44962.3	44952.8	46504	45038.4	47070.6	47536.8	46968.9	47551	48038.2	45161.7	44962.3	44952.8	High	High	High	High
-3.27653e+18	FALSE	High	IsMasterProtein	TGGT1_227970-t26_1-p1	transcript=TGGT1_227970-t26_1 | gene=TGGT1_227970 | organism=Toxoplasma_gondii_GT1 | gene_product=Histone family DNA-binding protein [Source:UniProtKB/TrEMBL;Acc:S7UX05] | transcript_product=histone family DNA-binding protein | location=TGGT1_chrX:610022-611286(+) | protein_length=235 | sequence_SO=chromosome | SO=protein_coding_gene | is_pseudo=false	0	46.483	36	7	27	7	235	25.1	6.96	108.21	7	0.968	1.151	1.081	1.035	1.071	1.086	0.953	0.987	1.097	6839.1	6623.6	7873.7	7395	7078.8	7324.7	7428.9	6518.5	6753.6	7504	6839.1	6623.6	7873.7	7395	7078.8	7324.7	7428.9	6518.5	6753.6	7504	High	High	High	High
-4.18561e+18	FALSE	High	IsMasterProtein	TGGT1_228100-t26_1-p1	transcript=TGGT1_228100-t26_1 | gene=TGGT1_228100 | organism=Toxoplasma_gondii_GT1 | gene_product=hypothetical protein | transcript_product=hypothetical protein | location=TGGT1_chrX:493043-502437(-) | protein_length=1314 | sequence_SO=chromosome | SO=protein_coding_gene | is_pseudo=false	0	8.213	2	2	2	2	1314	139.3	8.31	6.29	2	0.969	0.963	0.954	1.01	0.963	0.959	0.939	0.922	0.827	305.6	296	294.2	291.6	308.6	294.3	292.9	286.8	281.6	252.8	305.6	296	294.2	291.6	308.6	294.3	292.9	286.8	281.6	252.8	High	High	High	High
-8.24421e+18	FALSE	High	IsMasterProtein	TGGT1_275370-t26_1-p1	transcript=TGGT1_275370-t26_1 | gene=TGGT1_275370 | organism=Toxoplasma_gondii_GT1 | gene_product=SAG-related sequence SRS47C [Source:UniProtKB/TrEMBL;Acc:S7UQN6] | transcript_product=SAG-related sequence SRS47C | location=TGGT1_chrX:7094944-7096601(-) | protein_length=357 | sequence_SO=chromosome | SO=protein_coding_gene | is_pseudo=false	0	59.304	25	8	14	8	357	38.5	5.24	68.03	8	0.969	1.068	1.038	1.027	1.032	1.034	0.946	0.953	0.988	4959.5	4803.7	5295.8	5146.7	5093.3	5115.9	5129.1	4690.4	4724.1	4898.4	4959.5	4803.7	5295.8	5146.7	5093.3	5115.9	5129.1	4690.4	4724.1	4898.4	High	High	High	High
-5.07527e+18	FALSE	High	IsMasterProtein	TGGT1_249970-t26_1-p1	transcript=TGGT1_249970-t26_1 | gene=TGGT1_249970 | organism=Toxoplasma_gondii_GT1 | gene_product=PH domain-containing protein [Source:UniProtKB/TrEMBL;Acc:S7V0B0] | transcript_product=hypothetical protein | location=TGGT1_chrXII:4900104-4901997(+) | protein_length=229 | sequence_SO=chromosome | SO=protein_coding_gene | is_pseudo=false	0	67.51	61	11	52	11	229	24.7	9.58	159.27	11	0.969	1.029	1.019	0.98	1.034	1.039	0.961	0.98	0.903	17306.4	16763.4	17803.4	17631.1	16964.7	17894.2	17985.8	16630.1	16958.2	15630.3	17306.4	16763.4	17803.4	17631.1	16964.7	17894.2	17985.8	16630.1	16958.2	15630.3	High	High	High	High
7.94753e+18	FALSE	Low	IsMasterProtein	TGGT1_263570-t26_1-p1	transcript=TGGT1_263570-t26_1 | gene=TGGT1_263570 | organism=Toxoplasma_gondii_GT1 | gene_product=hypothetical protein | transcript_product=hypothetical protein | location=TGGT1_chrVIIb:443920-449327(-) | protein_length=394 | sequence_SO=chromosome | SO=protein_coding_gene | is_pseudo=false	0.065	1.07	2	1	2	1	394	46.2	8.43	5.06	1	0.969	1.009	0.995	1.028	1.026	1.06	1.143	1.029	1.101	1456.3	1410.7	1469	1448.6	1496.6	1493.6	1543.9	1664.3	1498.7	1602.9	1456.3	1410.7	1469	1448.6	1496.6	1493.6	1543.9	1664.3	1498.7	1602.9	High	High	High	High
3.45769e+17	FALSE	High	IsMasterProtein	TGGT1_289950-t26_1-p1	transcript=TGGT1_289950-t26_1 | gene=TGGT1_289950 | organism=Toxoplasma_gondii_GT1 | gene_product=hypothetical protein | transcript_product=hypothetical protein | location=TGGT1_chrIX:3349566-3356638(+) | protein_length=544 | sequence_SO=chromosome | SO=protein_coding_gene | is_pseudo=false	0.001	4.765	3	2	3	2	544	60	5.38	8.87	2	0.969	1.028	1.046	1.04	1.08	1.085	1.077	1.079	1.038	1309.5	1268.5	1345.9	1369.4	1362.4	1413.9	1421.3	1409.9	1412.4	1359.5	1309.5	1268.5	1345.9	1369.4	1362.4	1413.9	1421.3	1409.9	1412.4	1359.5	High	High	High	High
-2.94464e+18	FALSE	High	IsMasterProtein	TGGT1_224210-t26_1-p1	transcript=TGGT1_224210-t26_1 | gene=TGGT1_224210 | organism=Toxoplasma_gondii_GT1 | gene_product=C2 NT-type domain-containing protein [Source:UniProtKB/TrEMBL;Acc:S7WBT8] | transcript_product=hypothetical protein | location=TGGT1_chrX:3128859-3139913(-) | protein_length=1175 | sequence_SO=chromosome | SO=protein_coding_gene | is_pseudo=false	0.004	2.622	1	1	1	1	1175	129.4	7.71	2.37	1	0.969	0.916	0.954	0.992	0.971	0.962	1.133	0.912	1.017	421.3	408.1	385.9	401.9	418.1	409	405.4	477.4	384.4	428.4	421.3	408.1	385.9	401.9	418.1	409	405.4	477.4	384.4	428.4	High	High	High	High
-3.26178e+18	FALSE	High	IsMasterProtein	TGGT1_264940-t26_1-p1	transcript=TGGT1_264940-t26_1 | gene=TGGT1_264940 | organism=Toxoplasma_gondii_GT1 | gene_product=Kelch repeat-containing protein [Source:UniProtKB/TrEMBL;Acc:S7VV31] | transcript_product=kelch repeat-containing protein | location=TGGT1_chrIX:1716679-1727049(+) | protein_length=2048 | sequence_SO=chromosome | SO=protein_coding_gene | is_pseudo=false	0	19.413	3	3	3	3	2048	215.7	5.99	12.65	3	0.969	0.948	0.955	0.977	0.935	0.901	1.032	0.966	0.881	158.4	153.5	150.2	151.2	154.8	148.2	142.7	163.5	153	139.6	158.4	153.5	150.2	151.2	154.8	148.2	142.7	163.5	153	139.6	High	High	High	High
3.2277e+18	FALSE	High	IsMasterProtein	TGGT1_232350-t26_1-p1	transcript=TGGT1_232350-t26_1 | gene=TGGT1_232350 | organism=Toxoplasma_gondii_GT1 | gene_product=Lactate dehydrogenase LDH1 [Source:UniProtKB/TrEMBL;Acc:A0A125YWC8] | transcript_product=lactate dehydrogenase LDH1 | location=TGGT1_chrVIII:2023599-2025126(+) | protein_length=329 | sequence_SO=chromosome | SO=protein_coding_gene | is_pseudo=false	0	379.403	90	26	880	26	329	35.5	6.38	3623.93	26	0.969	1.01	1.006	0.978	1.004	1.028	0.95	0.962	0.953	155772	150949	157340	156732	152408	156390	160189	147971	149901	148390	155772	150949	157340	156732	152408	156390	160189	147971	149901	148390	High	High	High	High
2.28707e+18	FALSE	High	IsMasterProtein	TGGT1_243780-t26_1-p1	transcript=TGGT1_243780-t26_1 | gene=TGGT1_243780 | organism=Toxoplasma_gondii_GT1 | gene_product=hypothetical protein | transcript_product=hypothetical protein | location=TGGT1_chrVI:2766156-2769552(+) | protein_length=845 | sequence_SO=chromosome | SO=protein_coding_gene | is_pseudo=false	0	6.764	1	1	1	1	845	91.4	7.08	4.18	1	0.969	1.022	0.878	0.941	0.968	0.941	1.161	1.055	0.725	221.8	214.9	226.7	194.6	208.8	214.8	208.6	257.5	234	160.7	221.8	214.9	226.7	194.6	208.8	214.8	208.6	257.5	234	160.7	High	High	High	High
9.07966e+18	FALSE	High	IsMasterProtein	TGGT1_308810A-t26_1-p1	transcript=TGGT1_308810A-t26_1 | gene=TGGT1_308810A | organism=Toxoplasma_gondii_GT1 | gene_product=Rhoptry neck protein RON9 [Source:UniProtKB/TrEMBL;Acc:S7W0X1] | transcript_product=rhoptry neck protein RON9 | location=TGGT1_chrXI:238804-240535(+) | protein_length=577 | sequence_SO=chromosome | SO=protein_coding_gene | is_pseudo=false	0	93.053	32	11	29	6	577	62.6	5.27	115.16	11	0.969	1.052	1.047	1.016	1.033	1.001	1.323	1.053	1.075	2956.7	2865.2	3109.8	3095.5	3003.5	3055.7	2961.1	3912.8	3113.1	3179.1	2956.7	2865.2	3109.8	3095.5	3003.5	3055.7	2961.1	3912.8	3113.1	3179.1	High	High	High	High
9.21836e+17	FALSE	High	IsMasterProtein	TGGT1_224460-t26_1-p1	transcript=TGGT1_224460-t26_1 | gene=TGGT1_224460 | organism=Toxoplasma_gondii_GT1 | gene_product=Putative aminopeptidase n [Source:UniProtKB/TrEMBL;Acc:S7UWT6] | transcript_product=putative aminopeptidase n | location=TGGT1_chrX:2956872-2964821(+) | protein_length=970 | sequence_SO=chromosome | SO=protein_coding_gene | is_pseudo=false	0	149.222	32	27	54	25	970	108.7	5.92	196.7	27	0.969	1.002	1.001	1.004	1.005	1.011	0.95	0.968	0.956	16627.6	16113.4	16660.2	16648	16687.3	16707	16815.2	15802.2	16091	15896.3	16627.6	16113.4	16660.2	16648	16687.3	16707	16815.2	15802.2	16091	15896.3	High	High	High	High
8.83606e+18	FALSE	High	IsMasterProtein	TGGT1_272660-t26_1-p1	transcript=TGGT1_272660-t26_1 | gene=TGGT1_272660 | organism=Toxoplasma_gondii_GT1 | gene_product=hypothetical protein | transcript_product=hypothetical protein | location=TGGT1_chrVIII:3808733-3810272(+) | protein_length=258 | sequence_SO=chromosome | SO=protein_coding_gene | is_pseudo=false	0	115.101	54	17	70	17	258	28	6.43	275.5	17	0.969	1	0.994	0.966	1.004	0.993	0.942	0.959	0.943	26758.1	25933.2	26745.4	26607	25843.9	26869.3	26567.1	25200.4	25650.5	25244	26758.1	25933.2	26745.4	26607	25843.9	26869.3	26567.1	25200.4	25650.5	25244	High	High	High	High
-8.14086e+18	FALSE	High	IsMasterProtein	TGGT1_286630-t26_1-p1	transcript=TGGT1_286630-t26_1 | gene=TGGT1_286630 | organism=Toxoplasma_gondii_GT1 | gene_product=Peroxiredoxin [Source:UniProtKB/TrEMBL;Acc:S7VWS3] | transcript_product=redoxin domain-containing protein | location=TGGT1_chrV:1606591-1607469(+) | protein_length=292 | sequence_SO=chromosome | SO=protein_coding_gene | is_pseudo=false	0	112.034	47	15	98	15	292	31.1	8.79	359.92	15	0.969	1.05	1.019	0.986	1.033	1.003	0.933	0.995	0.947	20006.9	19390.2	21012.2	20392.7	19719.1	20671.6	20071.3	18669.1	19906	18951.2	20006.9	19390.2	21012.2	20392.7	19719.1	20671.6	20071.3	18669.1	19906	18951.2	High	High	High	High
-5.1217e+18	FALSE	High	IsMasterProtein	TGGT1_298970-t26_1-p1	transcript=TGGT1_298970-t26_1 | gene=TGGT1_298970 | organism=Toxoplasma_gondii_GT1 | gene_product=U6 snRNA-associated Sm-like protein LSm3 [Source:UniProtKB/TrEMBL;Acc:A0A125YZE5] | transcript_product=LSM3, U6 small nuclear RNA associated isoform 2 family protein | location=TGGT1_chrIII:2271735-2273392(+) | protein_length=96 | sequence_SO=chromosome | SO=protein_coding_gene | is_pseudo=false	0.002	3.748	15	2	4	2	96	10.7	5.94	9.34	2	0.969	0.995	1.041	1.029	1.026	1.06	0.943	0.986	1.001	1036.6	1004.7	1031.3	1079	1066.8	1063.7	1099.1	977.2	1022.5	1037.9	1036.6	1004.7	1031.3	1079	1066.8	1063.7	1099.1	977.2	1022.5	1037.9	High	High	High	High
3.83445e+16	FALSE	High	IsMasterProtein	TGGT1_232250-t26_1-p1	transcript=TGGT1_232250-t26_1 | gene=TGGT1_232250 | organism=Toxoplasma_gondii_GT1 | gene_product=Catalase [Source:UniProtKB/TrEMBL;Acc:S7V3B9] | transcript_product=catalase | location=TGGT1_chrVIII:1969434-1975537(-) | protein_length=502 | sequence_SO=chromosome | SO=protein_coding_gene | is_pseudo=false	0	83.216	32	18	24	18	502	57.2	7.2	78.18	18	0.969	0.969	0.976	1.017	0.975	0.989	1.142	1.021	1.16	12700.3	12309.5	12306.1	12399.5	12911.5	12384	12565.9	14506	12963.6	14727.4	12700.3	12309.5	12306.1	12399.5	12911.5	12384	12565.9	14506	12963.6	14727.4	High	High	High	High
4.50871e+18	FALSE	High	IsMasterProtein	TGGT1_262520-t26_1-p1	transcript=TGGT1_262520-t26_1 | gene=TGGT1_262520 | organism=Toxoplasma_gondii_GT1 | gene_product=PPIase cyclophilin-type domain-containing protein [Source:UniProtKB/TrEMBL;Acc:S7UY14] | transcript_product=putative cyclophilin | location=TGGT1_chrVIIb:1173800-1177155(-) | protein_length=311 | sequence_SO=chromosome | SO=protein_coding_gene | is_pseudo=false	0.003	3.396	3	1	1	1	311	34.6	9.28	2.63	1	0.969	1.048	1.038	1.087	1.056	0.961	1.158	0.968	1.055	145.2	140.7	152.2	150.7	157.8	153.4	139.5	168.1	140.5	153.2	145.2	140.7	152.2	150.7	157.8	153.4	139.5	168.1	140.5	153.2	High	High	High	High
-2.02465e+18	FALSE	High	IsMasterProtein	TGGT1_223940-t26_1-p1	transcript=TGGT1_223940-t26_1 | gene=TGGT1_223940 | organism=Toxoplasma_gondii_GT1 | gene_product=GAP45 protein [Source:UniProtKB/TrEMBL;Acc:A0A125YXT6] | transcript_product=GAP45 protein | location=TGGT1_chrX:3344621-3345358(-) | protein_length=245 | sequence_SO=chromosome | SO=protein_coding_gene | is_pseudo=false	0	186.81	76	25	171	25	245	27.3	5.07	595.83	25	0.969	0.996	1.001	0.998	0.987	1.012	0.898	0.931	0.949	55397.4	53697.7	55191.7	55451.8	55265.1	54658.4	56069.2	49723.7	51602.2	52594.1	55397.4	53697.7	55191.7	55451.8	55265.1	54658.4	56069.2	49723.7	51602.2	52594.1	High	High	High	High
-7.60319e+18	FALSE	High	IsMasterProtein	TGGT1_232280-t26_1-p1	transcript=TGGT1_232280-t26_1 | gene=TGGT1_232280 | organism=Toxoplasma_gondii_GT1 | gene_product=IMP2_N domain-containing protein [Source:UniProtKB/TrEMBL;Acc:S7WBN4] | transcript_product=hypothetical protein | location=TGGT1_chrVIII:1988375-1990326(+) | protein_length=275 | sequence_SO=chromosome | SO=protein_coding_gene | is_pseudo=false	0	136.444	61	19	81	18	275	30.1	6.11	294.84	19	0.969	0.996	0.994	0.993	1.007	1.026	0.933	0.928	0.934	32805.7	31801.4	32690.1	32622.5	32579.3	33027.8	33674.4	30616.4	30446.3	30634.7	32805.7	31801.4	32690.1	32622.5	32579.3	33027.8	33674.4	30616.4	30446.3	30634.7	High	High	High	High
8.20917e+18	FALSE	High	IsMasterProtein	TGGT1_293180-t26_1-p1	transcript=TGGT1_293180-t26_1 | gene=TGGT1_293180 | organism=Toxoplasma_gondii_GT1 | gene_product=ELFV_dehydrog domain-containing protein [Source:UniProtKB/TrEMBL;Acc:S7VXB8] | transcript_product=NADP-specific glutamate dehydrogenase | location=TGGT1_chrIa:124576-129868(-) | protein_length=578 | sequence_SO=chromosome | SO=protein_coding_gene | is_pseudo=false	0	254.579	59	29	204	29	578	63.8	8.18	740.02	29	0.969	0.999	0.987	0.972	0.977	0.983	0.948	0.953	0.945	70271.9	68121	70198.5	69359.3	68298.5	68658.3	69077.4	66584.5	66978	66397.3	70271.9	68121	70198.5	69359.3	68298.5	68658.3	69077.4	66584.5	66978	66397.3	High	High	High	High
-2.51119e+18	FALSE	High	IsMasterProtein	TGGT1_214340-t26_1-p1	transcript=TGGT1_214340-t26_1 | gene=TGGT1_214340 | organism=Toxoplasma_gondii_GT1 | gene_product=hypothetical protein | transcript_product=hypothetical protein | location=TGGT1_chrX:6144306-6147671(+) | protein_length=326 | sequence_SO=chromosome | SO=protein_coding_gene | is_pseudo=false	0	25.908	17	4	4	4	326	36.5	5.22	15.3	4	0.969	1.075	1.037	1.028	1.031	1.084	0.969	1.034	1.06	1575.6	1527.4	1694	1633.9	1619.5	1623.9	1707.6	1527.3	1628.5	1669.4	1575.6	1527.4	1694	1633.9	1619.5	1623.9	1707.6	1527.3	1628.5	1669.4	High	High	High	High
1.76315e+18	FALSE	High	IsMasterProtein	TGGT1_239530-t26_1-p1	transcript=TGGT1_239530-t26_1 | gene=TGGT1_239530 | organism=Toxoplasma_gondii_GT1 | gene_product=Aminotran_5 domain-containing protein [Source:UniProtKB/TrEMBL;Acc:S7W031] | transcript_product=alanine-glyoxylate aminotransferase | location=TGGT1_chrVI:730926-732071(+) | protein_length=381 | sequence_SO=chromosome | SO=protein_coding_gene | is_pseudo=false	0	70.677	38	11	16	11	381	41.8	7.21	60.54	11	0.969	1.033	1.017	0.998	1.027	1.046	0.98	0.976	0.967	6979.6	6766.2	7208.9	7099.5	6964.1	7167.3	7297.3	6837.5	6815.3	6750.2	6979.6	6766.2	7208.9	7099.5	6964.1	7167.3	7297.3	6837.5	6815.3	6750.2	High	High	High	High
-3.69779e+18	FALSE	High	IsMasterProtein	TGGT1_213930-t26_1-p1	transcript=TGGT1_213930-t26_1 | gene=TGGT1_213930 | organism=Toxoplasma_gondii_GT1 | gene_product=RNase_PH domain-containing protein [Source:UniProtKB/TrEMBL;Acc:S7VX62] | transcript_product=3' exoribonuclease family, domain 1 domain-containing protein | location=TGGT1_chrV:1313787-1320289(+) | protein_length=536 | sequence_SO=chromosome | SO=protein_coding_gene | is_pseudo=false	0	9.624	5	2	2	2	536	57.9	6.32	7.05	2	0.969	1.084	0.962	1.048	1.003	1.096	1.072	1.023	1.071	408.5	396.1	442.7	393	428	410	447.7	438.2	417.9	437.5	408.5	396.1	442.7	393	428	410	447.7	438.2	417.9	437.5	High	High	High	High
-7.56903e+18	FALSE	High	IsMasterProtein	TGGT1_211690-t26_1-p1	transcript=TGGT1_211690-t26_1 | gene=TGGT1_211690 | organism=Toxoplasma_gondii_GT1 | gene_product=DRBM domain-containing protein [Source:UniProtKB/TrEMBL;Acc:S7UKM4] | transcript_product=AAA family protein | location=TGGT1_chrIV:1531700-1551811(-) | protein_length=1538 | sequence_SO=chromosome | SO=protein_coding_gene | is_pseudo=false	0.001	4.302	1	2	3	2	1538	167.1	8.87	6.03	2	0.969	0.956	1.045	1.021	0.901	0.835	0.932	0.847	1.06	45.1	43.7	43.1	47.1	46	40.6	37.6	42	38.2	47.8	45.1	43.7	43.1	47.1	46	40.6	37.6	42	38.2	47.8	High	High	High	High
2.74489e+17	FALSE	High	IsMasterProtein	TGGT1_286090-t26_1-p1	transcript=TGGT1_286090-t26_1 | gene=TGGT1_286090 | organism=Toxoplasma_gondii_GT1 | gene_product=SUI1 domain-containing protein [Source:UniProtKB/TrEMBL;Acc:A0A125YYZ3] | transcript_product=putative translation initiation factor SUI1 | location=TGGT1_chrV:1856609-1857164(+) | protein_length=114 | sequence_SO=chromosome | SO=protein_coding_gene | is_pseudo=false	0	23.071	24	4	21	2	114	12.5	8.06	78.2	4	0.97	0.985	1.013	1.009	0.998	1.041	0.908	0.872	0.897	2353.6	2281.8	2318	2384.8	2375.6	2347.9	2449.1	2135.9	2053.2	2111.5	2353.6	2281.8	2318	2384.8	2375.6	2347.9	2449.1	2135.9	2053.2	2111.5	High	High	High	High
-3.38023e+18	FALSE	High	IsMasterProtein	TGGT1_259240-t26_1-p1	transcript=TGGT1_259240-t26_1 | gene=TGGT1_259240 | organism=Toxoplasma_gondii_GT1 | gene_product=40S ribosomal protein S21 [Source:UniProtKB/TrEMBL;Acc:S7WEL7] | transcript_product=ribosomal protein RPS21 | location=TGGT1_chrVIIb:2808644-2809838(-) | protein_length=82 | sequence_SO=chromosome | SO=protein_coding_gene | is_pseudo=false	0	65.401	71	6	56	6	82	9	8.05	223.64	6	0.97	1.031	1.053	1.043	1.073	1.106	1.028	1.016	1.088	9324.2	9040.2	9617.4	9818.8	9725.1	10008.4	10310.1	9586.3	9470.8	10149.2	9324.2	9040.2	9617.4	9818.8	9725.1	10008.4	10310.1	9586.3	9470.8	10149.2	High	High	High	High
-8.99232e+18	FALSE	High	IsMasterProtein	TGGT1_218260-t26_1-p1	transcript=TGGT1_218260-t26_1 | gene=TGGT1_218260 | organism=Toxoplasma_gondii_GT1 | gene_product=Histone H3 [Source:UniProtKB/TrEMBL;Acc:A0A125YLK7] | transcript_product=histone H3.3 | location=TGGT1_chrXII:1578063-1578473(+) | protein_length=136 | sequence_SO=chromosome | SO=protein_coding_gene | is_pseudo=false	0	38.021	38	9	118	9	136	15.4	11.3	336.23	9	0.97	1.015	1.005	0.961	0.97	0.977	0.969	0.896	0.826	46679.4	45261.2	47392.3	46926.4	44863.2	45281.9	45584.7	45220.1	41845.8	38550.3	46679.4	45261.2	47392.3	46926.4	44863.2	45281.9	45584.7	45220.1	41845.8	38550.3	High	High	High	High
-3.30852e+18	FALSE	High	IsMasterProtein	TGGT1_246920-t26_1-p1	transcript=TGGT1_246920-t26_1 | gene=TGGT1_246920 | organism=Toxoplasma_gondii_GT1 | gene_product=Glutathione reductase [Source:UniProtKB/TrEMBL;Acc:S7WH14] | transcript_product=glutathione reductase | location=TGGT1_chrXII:2948008-2954537(+) | protein_length=487 | sequence_SO=chromosome | SO=protein_coding_gene | is_pseudo=false	0	62.035	27	11	17	11	487	52.5	7.83	66.16	11	0.97	1.001	0.985	1.003	0.991	1.004	0.949	0.951	0.929	5004.4	4852.6	5009.5	4930.2	5019.3	4957.8	5023.3	4748.5	4756.8	4648.2	5004.4	4852.6	5009.5	4930.2	5019.3	4957.8	5023.3	4748.5	4756.8	4648.2	High	High	High	High
1.6309e+17	FALSE	Medium	IsMasterProtein	TGGT1_294550-t26_1-p1	transcript=TGGT1_294550-t26_1 | gene=TGGT1_294550 | organism=Toxoplasma_gondii_GT1 | gene_product=Dynein heavy chain [Source:UniProtKB/TrEMBL;Acc:S7VWW7] | transcript_product=dynein heavy chain | location=TGGT1_chrIa:919161-949027(+) | protein_length=4974 | sequence_SO=chromosome | SO=protein_coding_gene | is_pseudo=false	0.027	1.53	0	1	1	1	4974	558.3	5.73	2.17	1	0.97	0.872	0.912	1.063	0.993	1.132	1.165	0.95	1.008	354.4	343.7	309.2	323.1	376.9	351.8	401.2	412.8	336.7	357.2	354.4	343.7	309.2	323.1	376.9	351.8	401.2	412.8	336.7	357.2	High	High	High	High
-1.33701e+18	FALSE	High	IsMasterProtein	TGGT1_214290-t26_1-p1	transcript=TGGT1_214290-t26_1 | gene=TGGT1_214290 | organism=Toxoplasma_gondii_GT1 | gene_product=DJ-1_PfpI domain-containing protein [Source:UniProtKB/TrEMBL;Acc:A0A125YQ11] | transcript_product=DJ-1 family protein | location=TGGT1_chrX:6106825-6108652(+) | protein_length=256 | sequence_SO=chromosome | SO=protein_coding_gene | is_pseudo=false	0	138.728	60	12	169	12	256	27.9	9.04	620.49	12	0.97	1.007	1.003	0.997	1.024	1.055	0.968	0.994	0.982	23342.1	22636.5	23500.9	23420.5	23264.7	23894	24634.9	22605.8	23198.2	22929.8	23342.1	22636.5	23500.9	23420.5	23264.7	23894	24634.9	22605.8	23198.2	22929.8	High	High	High	High
1.39341e+18	FALSE	High	IsMasterProtein	TGGT1_249570-t26_1-p1	transcript=TGGT1_249570-t26_1 | gene=TGGT1_249570 | organism=Toxoplasma_gondii_GT1 | gene_product=hypothetical protein | transcript_product=hypothetical protein | location=TGGT1_chrXII:4585448-4592008(-) | protein_length=262 | sequence_SO=chromosome | SO=protein_coding_gene | is_pseudo=false	0	32.861	18	5	6	5	262	30.2	10.23	21.15	5	0.97	0.979	1.021	1.089	1.021	1.031	0.97	0.882	0.627	261.3	253.5	256	266.9	284.7	266.9	269.6	253.6	230.5	163.9	261.3	253.5	256	266.9	284.7	266.9	269.6	253.6	230.5	163.9	High	High	High	High
6.11964e+18	FALSE	High	IsMasterProtein	TGGT1_218920-t26_1-p1	transcript=TGGT1_218920-t26_1 | gene=TGGT1_218920 | organism=Toxoplasma_gondii_GT1 | gene_product=Proteasome subunit beta [Source:UniProtKB/TrEMBL;Acc:A0A125YL45] | transcript_product=putative proteasome subunit beta type | location=TGGT1_chrXII:1150482-1155225(+) | protein_length=309 | sequence_SO=chromosome | SO=protein_coding_gene | is_pseudo=false	0	54.129	32	8	19	8	309	33.7	6.68	69.5	8	0.97	1.02	1.009	1.001	0.97	0.99	1.058	1.001	1.034	6663.2	6463.2	6799.2	6720.8	6668.5	6463.3	6598.7	7046.6	6672.1	6891.2	6663.2	6463.2	6799.2	6720.8	6668.5	6463.3	6598.7	7046.6	6672.1	6891.2	High	High	High	High
-6.7451e+18	FALSE	High	IsMasterProtein	TGGT1_218820-t26_1-p1	transcript=TGGT1_218820-t26_1 | gene=TGGT1_218820 | organism=Toxoplasma_gondii_GT1 | gene_product=Alba domain-containing protein [Source:UniProtKB/TrEMBL;Acc:A0A125YFQ6] | transcript_product=alba 2 | location=TGGT1_chrXII:1217304-1219105(+) | protein_length=148 | sequence_SO=chromosome | SO=protein_coding_gene | is_pseudo=false	0	62.623	55	9	50	9	148	15.4	8.43	164.98	9	0.97	1.068	1.024	0.997	1.044	1.028	0.983	1.013	1.028	21634.7	20985.4	23102	22161.5	21559	22578.2	22230.3	21273.3	21923.6	22247.6	21634.7	20985.4	23102	22161.5	21559	22578.2	22230.3	21273.3	21923.6	22247.6	High	High	High	High
2.43673e+18	FALSE	High	IsMasterProtein	TGGT1_231440-t26_1-p1	transcript=TGGT1_231440-t26_1 | gene=TGGT1_231440 | organism=Toxoplasma_gondii_GT1 | gene_product=LsmAD domain-containing protein [Source:UniProtKB/TrEMBL;Acc:S7WJ46] | transcript_product=LsmAD domain-containing protein | location=TGGT1_chrVIII:1418874-1426956(-) | protein_length=1524 | sequence_SO=chromosome | SO=protein_coding_gene | is_pseudo=false	0	159.121	21	24	49	24	1524	148	9.44	181.41	24	0.97	1.029	1.02	1.009	1.025	1.037	0.963	0.972	0.981	13456	13053.5	13841.1	13730.2	13579.1	13790.6	13948.7	12960.2	13076.2	13196.6	13456	13053.5	13841.1	13730.2	13579.1	13790.6	13948.7	12960.2	13076.2	13196.6	High	High	High	High
-1.20734e+18	FALSE	High	IsMasterProtein	TGGT1_225940-t26_1-p1	transcript=TGGT1_225940-t26_1 | gene=TGGT1_225940 | organism=Toxoplasma_gondii_GT1 | gene_product=IMP2_N domain-containing protein [Source:UniProtKB/TrEMBL;Acc:S7UWV2] | transcript_product=hypothetical protein | location=TGGT1_chrX:1829329-1830851(-) | protein_length=315 | sequence_SO=chromosome | SO=protein_coding_gene | is_pseudo=false	0	61.233	29	9	19	9	315	33.7	5.05	63.67	9	0.97	1.002	0.993	0.978	1.007	1.039	0.94	0.949	0.911	8672.7	8414.5	8686.4	8612.8	8484.3	8730.3	9009.9	8148.4	8226.1	7902.2	8672.7	8414.5	8686.4	8612.8	8484.3	8730.3	9009.9	8148.4	8226.1	7902.2	High	High	High	High
1.87214e+18	FALSE	High	IsMasterProtein	TGGT1_292280-t26_1-p1	transcript=TGGT1_292280-t26_1 | gene=TGGT1_292280 | organism=Toxoplasma_gondii_GT1 | gene_product=SAG-related sequence SRS36D [Source:UniProtKB/TrEMBL;Acc:A0A125YQN8] | transcript_product=SAG-related sequence SRS36D | location=AAQM03000442:1288-2391(-) | protein_length=367 | sequence_SO=contig | SO=protein_coding_gene | is_pseudo=false	0	115.219	45	14	54	14	367	39.1	6.06	227.94	14	0.97	1.059	1.035	0.996	1.035	1.047	0.92	0.991	0.996	18860.1	18298.6	19976	19513.4	18789.9	19514.4	19745.2	17343	18683.9	18790.7	18860.1	18298.6	19976	19513.4	18789.9	19514.4	19745.2	17343	18683.9	18790.7	High	High	High	High
4.07539e+18	FALSE	High	IsMasterProtein	TGGT1_273660-t26_1-p1	transcript=TGGT1_273660-t26_1 | gene=TGGT1_273660 | organism=Toxoplasma_gondii_GT1 | gene_product=AP2/ERF domain-containing protein [Source:UniProtKB/TrEMBL;Acc:S7WJU8] | transcript_product=AP2 domain transcription factor AP2VIII-3 | location=TGGT1_chrVIII:3323793-3331330(-) | protein_length=2084 | sequence_SO=chromosome | SO=protein_coding_gene | is_pseudo=false	0	10.434	2	2	2	2	2084	215.8	6.13	8.77	2	0.97	1.054	1.089	1.304	0.984	0.991	1.108	1.105	1.093	150.5	146	158.6	163.9	196.3	148.1	149.2	166.8	166.3	164.5	150.5	146	158.6	163.9	196.3	148.1	149.2	166.8	166.3	164.5	High	High	High	High
8.78757e+18	FALSE	High	IsMasterProtein	TGGT1_313580-t26_1-p1	transcript=TGGT1_313580-t26_1 | gene=TGGT1_313580 | organism=Toxoplasma_gondii_GT1 | gene_product=Cytochrome b5 heme-binding domain-containing protein [Source:UniProtKB/TrEMBL;Acc:S7W282] | transcript_product=cytochrome b5 family heme/steroid binding domain-containing protein | location=TGGT1_chrXI:3449132-3451848(-) | protein_length=431 | sequence_SO=chromosome | SO=protein_coding_gene | is_pseu…	0	23.795	15	6	18	6	431	45.1	7.23	56.46	6	0.97	0.977	0.959	0.952	0.94	0.946	0.952	0.923	0.873	2838.6	2754.4	2772.6	2721.3	2702	2668.7	2683.9	2703.7	2619.2	2479.2	2838.6	2754.4	2772.6	2721.3	2702	2668.7	2683.9	2703.7	2619.2	2479.2	High	High	High	High
-7.18666e+17	FALSE	High	IsMasterProtein	TGGT1_251760-t26_1-p1	transcript=TGGT1_251760-t26_1 | gene=TGGT1_251760 | organism=Toxoplasma_gondii_GT1 | gene_product=PA28_beta domain-containing protein [Source:UniProtKB/TrEMBL;Acc:S7WG14] | transcript_product=putative subunit of proteaseome activator complex | location=TGGT1_chrXII:5486831-5490570(-) | protein_length=269 | sequence_SO=chromosome | SO=protein_coding_gene | is_pseudo=false	0	60.236	31	8	22	8	269	30.7	7.02	77.67	8	0.97	1.003	0.973	0.97	0.993	0.989	0.935	0.934	0.951	2843.6	2759.2	2853	2767.7	2756.9	2824.9	2811.2	2658.2	2656.9	2703.4	2843.6	2759.2	2853	2767.7	2756.9	2824.9	2811.2	2658.2	2656.9	2703.4	High	High	High	High
7.46252e+18	FALSE	High	IsMasterProtein	TGGT1_286770-t26_1-p1	transcript=TGGT1_286770-t26_1 | gene=TGGT1_286770 | organism=Toxoplasma_gondii_GT1 | gene_product=hypothetical protein | transcript_product=hypothetical protein | location=TGGT1_chrV:1537551-1538012(+) | protein_length=153 | sequence_SO=chromosome | SO=protein_coding_gene | is_pseudo=false	0	8.405	8	1	1	1	153	17.2	5.8	5.41	1	0.97	0.779	0.912	0.98	1	1.046	0.979	1.039	1.12	481.4	467.2	375.2	439.2	471.8	481.4	503.3	471.3	500.1	539.1	481.4	467.2	375.2	439.2	471.8	481.4	503.3	471.3	500.1	539.1	High	High	High	High
-3.36315e+18	FALSE	High	IsMasterProtein	TGGT1_211680-t26_1-p1	transcript=TGGT1_211680-t26_1 | gene=TGGT1_211680 | organism=Toxoplasma_gondii_GT1 | gene_product=Protein disulfide-isomerase [Source:UniProtKB/TrEMBL;Acc:A0A125YQI9] | transcript_product=protein disulfide isomerase | location=TGGT1_chrIV:1556190-1558014(+) | protein_length=471 | sequence_SO=chromosome | SO=protein_coding_gene | is_pseudo=false	0	440.514	73	41	787	39	471	52.8	5.22	2853.39	41	0.971	1.027	1.028	0.982	1.019	1.022	0.928	0.95	0.914	226932	220250	233090	233359	222755	231328	231886	210504	215512	207486	226932	220250	233090	233359	222755	231328	231886	210504	215512	207486	High	High	High	High
-4.47687e+18	FALSE	High	IsMasterProtein	TGGT1_221980-t26_1-p1	transcript=TGGT1_221980-t26_1 | gene=TGGT1_221980 | organism=Toxoplasma_gondii_GT1 | gene_product=U1 zinc finger protein [Source:UniProtKB/TrEMBL;Acc:S7VZU8] | transcript_product=U1 zinc finger protein | location=TGGT1_chrII:717248-720524(+) | protein_length=558 | sequence_SO=chromosome | SO=protein_coding_gene | is_pseudo=false	0	7.179	5	3	5	3	558	59.9	6.35	11.99	3	0.971	0.955	0.999	1.106	1.043	1.024	1.019	0.934	0.981	561.1	544.6	536.1	560.3	620.7	585	574.8	572	523.8	550.4	561.1	544.6	536.1	560.3	620.7	585	574.8	572	523.8	550.4	High	High	High	High
[truncated: 2,253 more rows]
[truncated: 8 more columns]

## Sheet: 5.2_input_Exp1_R2_54C
Proteins Unique Sequence ID	Checked	Protein FDR Confidence: Combined	Master	Accession	Description	Exp. q-value: Combined	Sum PEP Score	Coverage [%]	# Peptides	# PSMs	# Unique Peptides	# AAs	MW [kDa]	calc. pI	Score Sequest HT: Sequest HT	# Peptides (by Search Engine): Sequest HT	Abundance Ratio: (10) / (0)	Abundance Ratio: (100) / (0)	Abundance Ratio: (250) / (0)	Abundance Ratio: (500) / (0)	Abundance Ratio: (750) / (0)	Abundance Ratio: (1000) / (0)	Abundance Ratio: (10000) / (0)	Abundance Ratio: (100000) / (0)	Abundance Ratio: (1000000) / (0)	Abundances (Grouped): 0	Abundances (Grouped): 10	Abundances (Grouped): 100	Abundances (Grouped): 250	Abundances (Grouped): 500	Abundances (Grouped): 750	Abundances (Grouped): 1000	Abundances (Grouped): 10000	Abundances (Grouped): 100000	Abundances (Grouped): 1000000	Abundances (Normalized): F1: 126, Sample, 0	Abundances (Normalized): F1: 127N, Sample, 10	Abundances (Normalized): F1: 127C, Sample, 100	Abundances (Normalized): F1: 128N, Sample, 250	Abundances (Normalized): F1: 128C, Sample, 500	Abundances (Normalized): F1: 129N, Sample, 750	Abundances (Normalized): F1: 129C, Sample, 1000	Abundances (Normalized): F1: 130N, Sample, 10000	Abundances (Normalized): F1: 130C, Sample, 100000	Abundances (Normalized): F1: 131, Sample, 1000000	Found in Sample: [S1] F1: 126, Sample, 0	Found in Sample: [S3] F1: 127N, Sample, 10	Found in Sample: [S4] F1: 127C, Sample, 100	Found in Sample: [S5] F1: 128N, Sample, 250
[truncated: 2,579 more rows]
[truncated: 8 more columns]

[truncated: 12 more sheets: 5.3_input_Exp1_R1_58C, 5.4_input_Exp1_R2_58C, 5.5_Exp1_mineCETSA_fits, 5.5_Exp1_mineCETSA_AUC, 5.6_input_Exp2_R1_50C, 5.7_input_Exp2_R2_50C, 5.8_input_Exp2_R1_54C, 5.9_input_Exp2_R2_54C, 5.10_input_Exp2_R1_58C, 5.11_input_Exp2_R2_58C, 5.12_Exp2_mineCETSA_fits, 5.13_Exp2_mineCETSA_AUC]
