# Supplementary material for: Temporal and thermal profiling of the Toxoplasma proteome implicates parasite Protein Phosphatase 1 in the regulation of Ca2+-responsive pathways
Source: eLife. 2022 Aug 17;11:e80336. doi: 10.7554/eLife.80336 (PMC9436416; doi:10.7554/eLife.80336)
Supplement: Supplementary file 7. [file elife-80336-supp7.xlsx]

## Sheet: Oligonucleotides
Primer publication ID	Primer name	Sequence	Use
P1	oALH426	tgcattcgctccggttttgcacagccgttctgtctcacgagaacgcatagtgttcgtccg	Primer to amplify MIC2 5'UTR with 40 bp of homology to neutral locus 1
P2	oALH091	tgtcggtgggtgccggctcgtctgtcgcaggtggcctgcagtgtcactgtagcctgccag	oligo with homology to DHFR 3'UTR and neutral locus 1
P3	oALH199	TGGGGATGTCAAGTTGCTTTCACGTCGTGGTAATCTGTTTaAGAGCTAtgctgGAAAcagcaTAGCAAGTTtAAATAAGGCTAGTCCGTTATCAACTTGAAAAAGTGGCACCGAGTCGGTGCTTTTTTTTTCTTTTTCtctagaggtacCATGCATctaACCACTTTGTGTCGCTGTGGCAGCTACGCCATAGCCACTGAGAGACCGGTCTCAGCCTCCTGTCACGGGCACCATGGACCCTTTCACGTCGTGGTCTGGAAGTGAAACG	C-terminal cutting unit for TGGT1_226030 (PKA-C1)
P4	oALH224	TGGGGATGTCAAGTTGTGCAGCTTCTCTCTGAGACAGTTTaAGAGCTAtgctgGAAAcagcaTAGCAAGTTtAAATAAGGCTAGTCCGTTATCAACTTGAAAAAGTGGCACCGAGTCGGTGCTTTTTTTTTCTTTTTCtctagaggtacCATGCATctaAGAAAAGAAATCCCAATTTCTGACGGCAGACAAGGCTCTGAGAGACCGGTCTCAGCCCGTCGCGGGTTTACGCGGTCTTGCTGCAGCTTCTCTCTCTGGAAGTGAAACG	C-terminal cutting unit for TGGT1_227800 (Eps15)
P5	oALH545	TGGGGATGTCAAGTTGCGACGATATAACAAGACCTTGTTTaAGAGCTAtgctgGAAAcagcaTAGCAAGTTtAAATAAGGCTAGTCCGTTATCAACTTGAAAAAGTGGCACCGAGTCGGTGCTTTTTTTTTCTTTTTCtctagaggtacCATGCATctaCTGTTACATTTGATTCCTTTTCGCCGGGGTTGGGTTCCCTAGAGACCGGTCTCAACGGGCGCACGAACAGTTTGGTTACCGAGAAATAACTGCCTCTGGAAGTGAAACG	C-terminal cutting unit for TGGT1_286710
P6	oALH493	TGGGGATGTCAAGTTGGAAAATAAAAAGTATTAGTGTTTaAGAGCTAtgctgGAAAcagcaTAGCAAGTTtAAATAAGGCTAGTCCGTTATCAACTTGAAAAAGTGGCACCGAGTCGGTGCTTTTTTTTTCTTTTTCtctagaggtacCATGCATctaTTGCATGTGGAGAACTCAGGCATTTTCAACTTGTCTAAATAGAGACCGGTCTCACGCCAAGCTGGACGCTCAGAACCAACAAGATGCGGGAAAATCTGGAAGTGAAACG	C-terminal cutting unit for TGGT1_309290
P7	oALH407	TGGGGATGTCAAGTTGTAAAACAATCGTCGTGAGCTGTTTaAGAGCTAtgctgGAAAcagcaTAGCAAGTTtAAATAAGGCTAGTCCGTTATCAACTTGAAAAAGTGGCACCGAGTCGGTGCTTTTTTTTTCTTTTTCtctagaggtacCATGCATctaCGACAGAAGACTGACGGGTCCACGGTGGAAAGGTTTCGGGAGAGACCGGTCTCAGACACAAGCTTTCCTCGACGATAAGACTATTGTGGTCTCCTCTGGAAGTGAAACG	C-terminal cutting unit for TGGT1_321650 (RON13)
P8	oALH428	TGGGGATGTCAAGTTGAGGCATGGCCAAATAAACGAGTTTaAGAGCTAtgctgGAAAcagcaTAGCAAGTTtAAATAAGGCTAGTCCGTTATCAACTTGAAAAAGTGGCACCGAGTCGGTGCTTTTTTTTTCTTTTTCtctagaggtacCATGCATctaGAGAGTGCCCTCGGGAATATCTTTCGTTATAAATACGCTGAGAGACCGGTCTCAgATCCTCAAACCAGTGGAAAAGAAGAAAGGCATGGCCAAATCTGGAAGTGAAACG	C-terminal cutting unit for TGGT1_310700 (PP1)

## Sheet: Plasmids
Plasmid name	GenBank ID	Use
pMIC2_MIC2Gluc_myc_P2A_GCaMP6f_DHFR3′UTR	ON312866	template to amplify pMIC2-MIC2-Gluc-myc-P2A-GCaMP6f-3'DHFR
pBM041	MN019116.1	gRNA/Cas9 plasmid targeting the neutral genomic locus
pALH083	ON312867	V5-mCherry-mAID-Ty tagging vector
pALH052	OM863784	V5-mCherry-mAID-HA tagging vector
pALH047	ON312868	V5-3xHA tagging vector
pGL015	OM640005	V5-mNG-mAID-Ty agging vector
pEC341	OM863788	HA-loxP-U1 tagging vector
pALH086	ON312869	V5-mAID-HA tagging vector
pSS014	OM640002	Cas9-expression plasmid
